# Supplementary material for: Desarrollo sustentable, medio ambiente y minería. Distrito Pichidegua, Provincia Cachapoal, VI Región
Source: Royal Society of Chemistry journal article supplement (doi:10.1039/d4an00301b), 2001-01-01
Supplement: d4an00301b1.pdf [file d4an00301b1.pdf]

## Supplementary Figures

The ANN model (Figure S1) consisted of 1 densely connected hidden layer with 100 nodes each and a ‘Rectified Linear Unit’ (relu) as the activation function [`keras.layers.Dense(100, activation = 'relu')`], 1 hidden layer with 100 nodes, and ‘Dropout’ as the activation function [`keras.layers.Dropout`], and 1 densely connected hidden layer with 100 nodes and ‘Sigmoid’ as the activation function [`keras.layers.Dense(100, activation = 'sigmoid')`] (Figure S1). The purpose of the dropout layer is to remove all the unnecessary nodes and connections that were created during the development of the model but did not play a significant role in the outcome. The removal of these nodes decreases the computational processing time and reduces the potential for over-fitting. The optimal number of hidden layers was determined by comparing four model scenarios with an increasing number of hidden layers, 3, 4, 5, and 6 (Figure S3). We examined the MAE at the end of the training cycle at 500 epochs and the overall minimum MAE. As shown in Figure S3, we did not observe large differences between the four scenarios.

The optimizer used was ‘AdamOptimizer’ with 0.001 as the training step [`tf.train.AdamOptimizer(0.001)`]. We ran the model for 500 epochs to identify the time point at which the model reaches the minimum MAE for the testing set and we set the model’s training patience to that number [`early_stop = keras.callbacks.EarlyStopping (monitor = 'val_loss', patience = 100)`] (Figure S3), approximately 100 epochs. The model then uses its algorithm to identify the appropriate time to stop the training after 100 epochs. (Figure S2).

**Figure S1.** Schematic diagram of the ANN model showing the hidden layers, number of nodes, and the activation functions. The model consisted of 1 densely connected hidden layer with 100 nodes each and ‘Rectified Linear Unit’ (relu) as the activation function, 1 hidden layer with 100 nodes and ‘Dropout’ as the activation function, and 1 densely connected hidden layer with 100 nodes and ‘Sigmoid’ as the activation function. The purpose of the dropout layer is to remove all the unnecessary nodes and connections that were created during the development of the model but did not play a significant role in the outcome. The removal of these nodes decreases the computational processing time and reduces the potential for over-fitting.

**Figure S2.** MAE during the optimization of the ANN model for the training (blue) and testing sets (orange). We ran the model for 500 epochs (A) to identify the time point at which the validation MAE reached its minimum and we set the training patience of the model to that point, approximately 100 epochs. Using its supportive algorithm, the model then identified the appropriate time to stop the training after 100 epochs, which, in this case, was approximately 120 epochs (B).

**Figure S3.** MAE for the training and testing set of the ANN for four different numbers of hidden layers: (A) 3 hidden layers, (B) 7 hidden layers, (C) 11 hidden layers, and (D) 21 hidden layers. The dashed gray line shows the MAE of the testing set at 500 epochs. It is important to note that the model also contains a function (EarlyStopping) for identifying the time point with the smallest MAE for the testing set and it will stop the training automatically at that point. For example, in plot (C), the MAE at 500 epochs is 0.33, however, the minimum MAE is 0.31, which is located at approximately 120 epochs.

**Figure S4.** A typical chromatogram, and M2 spectra of several typical compounds in foods.

Figure S1

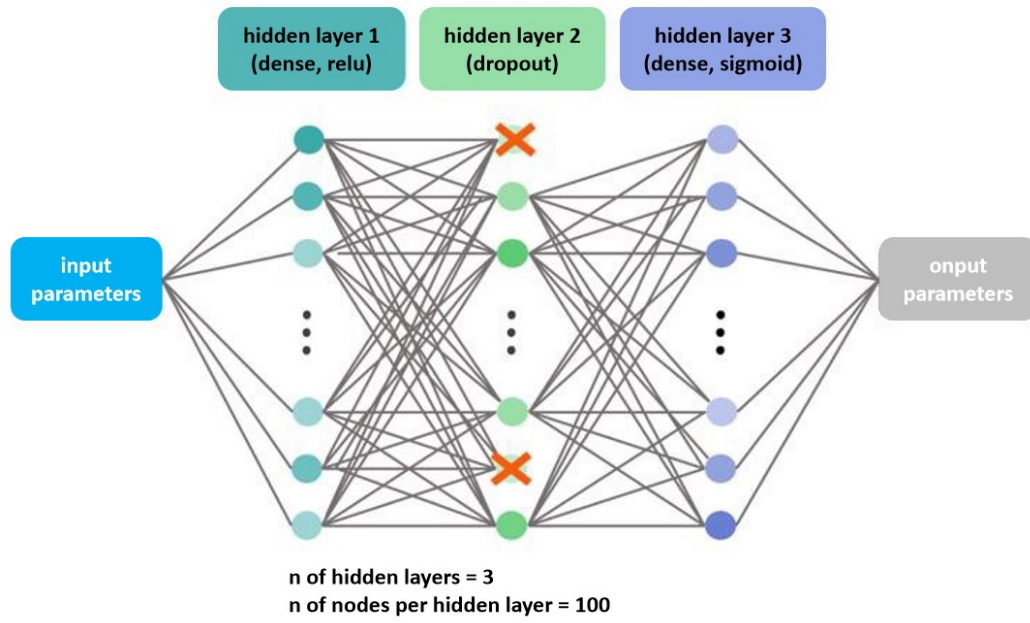

Figure S2

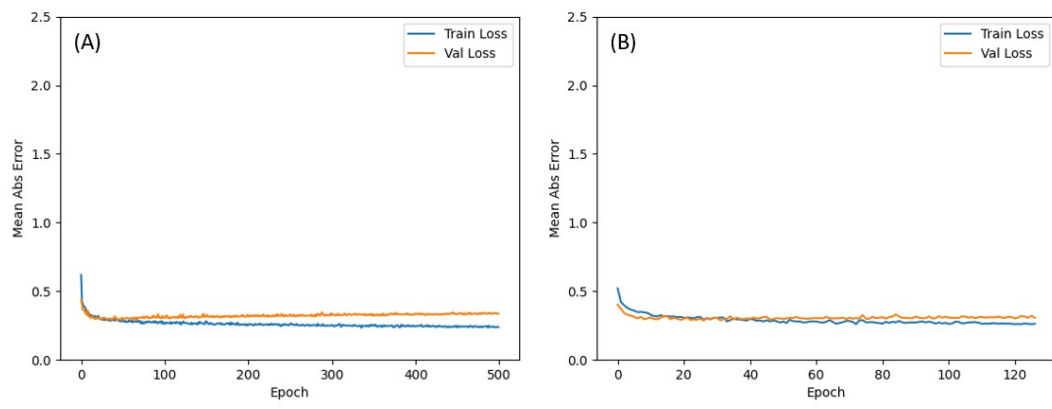

Figure S3

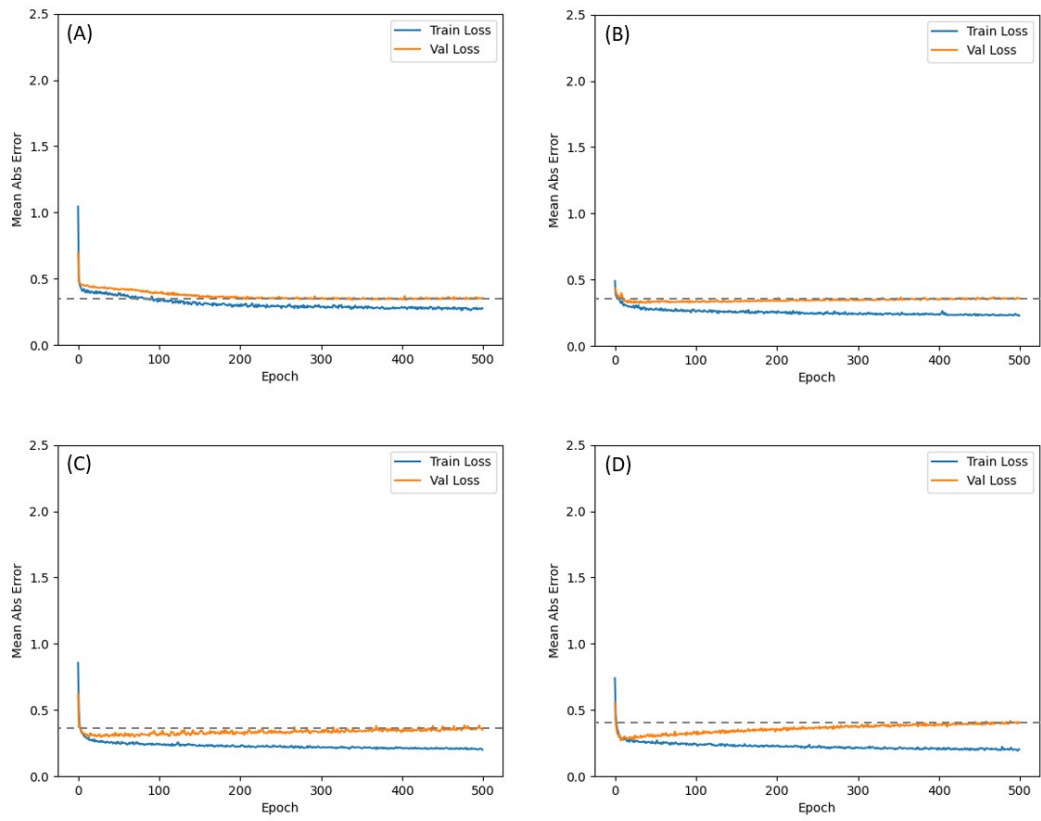

Figure S4

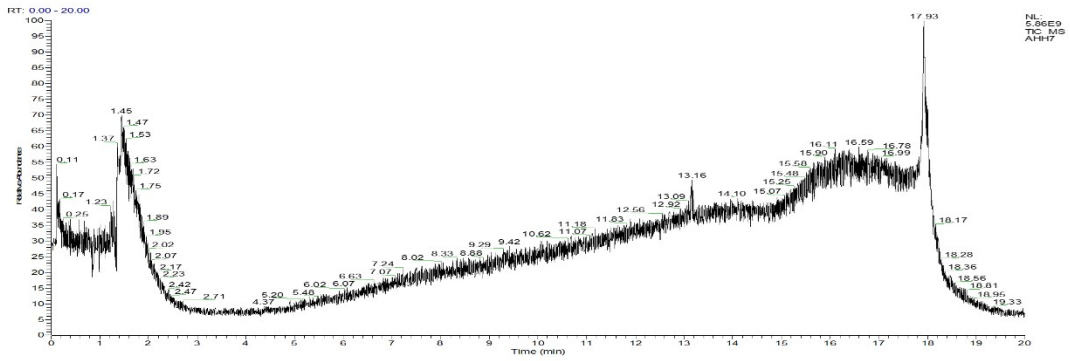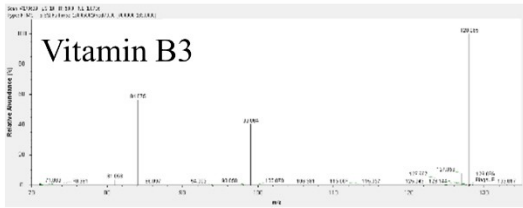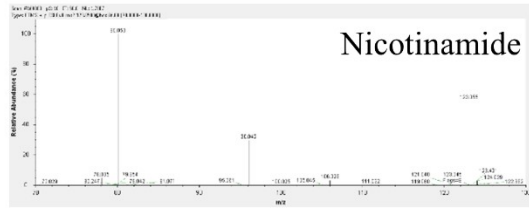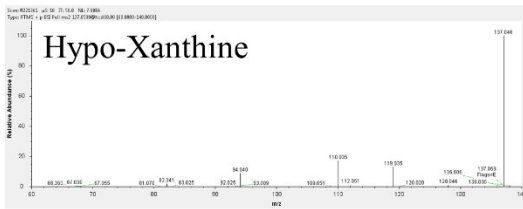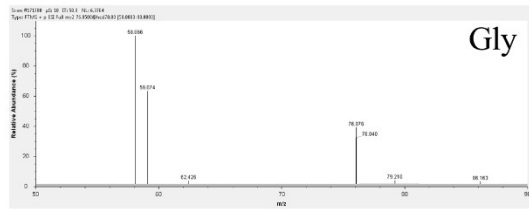

## **Supplementary Tables**

### **Table S1: Detailed information of material.**

There is detailed information on the 70 compounds covered in the article (e.g. classification, name, manufacturer, origin, purity, formula, m/z, CAS, and SMILES).

### **Table S2: Detailed information on liquid chromatography and mass spectrometry conditions.**

There is detailed information on the liquid chromatography and mass spectrometry conditions used in the article (e.g. scan mode, source parameters, liquid chromatography column, mobile phase (A/B), elution mode, etc.).

Table S1

| Classification | Name                     | Manufacturer                        | Origin             | Purity        | Formula    | m/z      | CAS                      | SMILES                           |
|----------------|--------------------------|-------------------------------------|--------------------|---------------|------------|----------|--------------------------|----------------------------------|
| Amino acid     | Glycine                  | Sigma Aldrich                       | St. Louis, MO, USA | 99.00%        | C2H5NO2    | 76.04    | 56-40-6                  | OC(CN)=O                         |
|                | Alanine                  | Sigma Aldrich                       | St. Louis, MO, USA | 99.00%        | C3H7NO2    | 90.056   | 56-41-7                  | OC([C@H](C)N)=O                  |
|                | Leucine                  | Sigma Aldrich                       | St. Louis, MO, USA | 98.00%        | C6H13NO2   | 132.102  | 61-90-5                  | OC([C@H](CC(C)C)N)=O             |
|                | Isoleucine               | Sigma Aldrich                       | St. Louis, MO, USA | ≥98.00%       | C6H13NO2   | 132.102  | 73-32-5                  | OC([C@@H](N)[C@@H](C)CC)=O       |
|                | Valine                   | Sigma Aldrich                       | St. Louis, MO, USA | ≥98.00%       | C5H11NO2   | 118.087  | 72-18-4                  | OC([C@@H](N)C(C)C)=O             |
|                | Proline                  | Sigma Aldrich                       | St. Louis, MO, USA | ≥99.00%       | C5H9NO2    | 116.071  | 147-85-3                 | OC([C@H]1NCCC1)=O                |
|                | Phenylalanine            | Aladdin Reagent Co., Ltd            | Shanghai, China    | 99.00%        | C9H11NO2   | 166.086  | 63-91-2                  | OC([C@H](N)CC1=CC=CC=C1)=O       |
|                | Methionine               | Sigma Aldrich                       | St. Louis, MO, USA | 99.00%        | C5H11NO2S  | 150.059  | 63-68-3                  | OC([C@H](CCSC)N)=O               |
|                | Tryptophan               | Sigma Aldrich                       | St. Louis, MO, USA | 98.00%        | C11H12N2O2 | 205.097  | 73-22-3                  | OC([C@H](N)CC1=CNC2=CC=CC=C21)=O |
|                | Serine                   | Sigma Aldrich                       | St. Louis, MO, USA | 99.00%        | C3H7NO3    | 106.05   | 56-45-1                  | OC([C@H](CO)N)=O                 |
|                | Glutamine                | Aladdin Reagent Co., Ltd            | Shanghai, China    | 99.00%        | C5H10N2O3  | 147.077  | 56-85-9                  | OC([C@H](CCC(N)=O)N)=O           |
|                | Threonine                | Sigma Aldrich                       | St. Louis, MO, USA | ≥98.00%       | C4H9NO3    | 120.066  | 72-19-5                  | O=C(O)[C@H](N)[C@H](O)C          |
|                | Cysteine                 | Sigma Aldrich                       | St. Louis, MO, USA | 97.00%        | C3H7NO2S   | 122.027  | 52-90-4                  | OC([C@H](CS)N)=O                 |
|                | Asparagine               | Sigma Aldrich                       | St. Louis, MO, USA | 98.00%        | C4H8N2O3   | 133.061  | 70-47-3                  | O=C(O)[C@H](N)CC(N)=O            |
|                | Tyrosine                 | Aladdin Reagent Co., Ltd            | Shanghai, China    | ≥99.00%       | C9H11NO3   | 182.081  | 60-18-4                  | OC([C@H](N)CC1=CC=C(O)C=C1)=O    |
|                | Aspartic acid            | Sigma Aldrich                       | St. Louis, MO, USA | 99.00%        | C4H7NO4    | 134.045  | 56-84-8                  | O=C(O)[C@H](N)CC(O)=O            |
|                | Glutamic acid            | Sigma Aldrich                       | St. Louis, MO, USA | 98.00%        | C5H9NO4    | 148.061  | 56-86-0                  | OC([C@H](CCC(O)=O)N)=O           |
|                | Lysine                   | Sigma Aldrich                       | St. Louis, MO, USA | 98.00%        | C6H14N2O2  | 147.113  | 56-87-1                  | OC([C@H](CCCCN)N)=O              |
|                | Arginine                 | Sigma Aldrich                       | St. Louis, MO, USA | 98.00%        | C6H14N4O2  | 175.119  | 74-79-3                  | OC([C@H](CCC/N=C(N)N)N)=O        |
|                | Histidine                | Sinopharm Chemical Reagent Co., Ltd | Shanghai, China    | 99.00%        | C6H9N3O2   | 156.077  | 71-00-1                  | O=C(O)[C@H](N)CC1=CN=CN1         |
| Citrulline     | Aladdin Reagent Co., Ltd | Shanghai, China                     | 98.00%             | C6H13N3O3     | 176.103    | 372-75-8 | OC([C@H](CCCNC(N)=O)N)=O |                                  |
| Taurine        | Aladdin Reagent Co., Ltd | Shanghai, China                     | 98.00%             | C2H7NO3S      | 126.022    | 107-35-7 | NCCS(O)(=O)=O            |                                  |
| Metabolites    | Hypotaurine              | Sigma Aldrich                       | St. Louis, MO, USA | ≥98.00% (TLC) | C2H7NO2S   | 110.027  | 300-84-5                 | NCCS(O)=O                        |



|                    |                         |                              |                    |                          |            |         |           |                                                                        |
|--------------------|-------------------------|------------------------------|--------------------|--------------------------|------------|---------|-----------|------------------------------------------------------------------------|
|                    | L-Hydroxyproline        | Solarbio Reagent Co., Ltd    | Shanghai, China    | ≥99.0%                   | C5H9NO3    | 132.066 | 51-35-4   | <chem>O[C@H]1CN[C@H](C(O)=O)C1</chem>                                  |
|                    | Spermidine              | Aladdin Reagent Co., Ltd     | Shanghai, China    | 99.00%                   | C7H19N3    | 146.165 | 124-20-9  | <chem>NCCCCCCCN</chem>                                                 |
|                    | N-omega-acetylhistamine | Sigma Aldrich                | St. Louis, MO, USA | 98.00%                   | C7H11N3O   | 154.097 | 673-49-4  | <chem>CC(NCCCC=CN=CN1)=O</chem>                                        |
|                    | L-pyroglutamic acid     | Sigma Aldrich                | St. Louis, MO, USA | 98.00%                   | C5H7NO3    | 130.05  | 98-79-3   | <chem>OC([C@H]1NC(C(=O)O)=O)</chem>                                    |
|                    | Tyramine                | Sigma Aldrich                | St. Louis, MO, USA | ≥98.50% (GC)             | C8H11NO    | 138.091 | 51-67-2   | <chem>NCCCC=CC(=O)C=C1</chem>                                          |
|                    | Histamine               | Sigma Aldrich                | St. Louis, MO, USA | ≥99%                     | C5H9N3     | 112.087 | 51-45-6   | <chem>NCCCC=CN=CN1</chem>                                              |
|                    | Creatinine              | Aladdin Reagent Co., Ltd     | Shanghai, China    | 99.00%                   | C4H7N3O    | 114.067 | 60-27-5   | <chem>O=C1CN(C)C(N)=N1</chem>                                          |
|                    | L-Dihydroorotic acid    | Sigma Aldrich                | St. Louis, MO, USA | ≥99.00%                  | C5H6N2O4   | 159.04  | 5988-19-2 | <chem>O=C(C[C@H](C(O)=O)N)NC1=O</chem>                                 |
|                    | L-Carnosine             | Aladdin Reagent Co., Ltd     | Shanghai, China    | 98.00%                   | C9H14N4O3  | 227.114 | 305-84-0  | <chem>OC([C@H](NC(CCN)=O)CC1=CN=CN1)=O</chem>                          |
|                    | Uric acid               | Aladdin Reagent Co., Ltd     | Shanghai, China    | 99.00%                   | C5H4N4O3   | 169.036 | 69-93-2   | <chem>O=C(N1)NC2=C1NC(NC2=O)=O</chem>                                  |
|                    | Betaine                 | Aladdin Reagent Co., Ltd     | Shanghai, China    | 99.00%                   | C5H11NO2   | 118.086 | 107-43-7  | <chem>[O-]C(C[N+](C)(C)C)=O</chem>                                     |
|                    | Sarcosine               | Macklin Biochemical Co., Ltd | Shanghai, China    | 99.00%                   | C3H7NO2    | 90.056  | 107-97-1  | <chem>OC(CNC)=O</chem>                                                 |
| <b>Nucleobases</b> | Cytosine                | Sigma Aldrich                | St. Louis, MO, USA | ≥99.0%                   | C4H5N3O    | 112.051 | 71-30-7   | <chem>NC(N1)=CC=NC1=O</chem>                                           |
|                    | Hypoxanthine            | Macklin Biochemical Co., Ltd | Shanghai, China    | 99.00%                   | C5H4N4O    | 137.046 | 68-94-0   | <chem>O=C1C2=C(N=CN2)N=CN1</chem>                                      |
|                    | Xanthine                | Aladdin Reagent Co., Ltd     | Shanghai, China    | ≥99.5% (HPLC)            | C5H4N4O2   | 153.041 | 69-89-6   | <chem>O=C(N1)NC(C2=C1N=CN2)=O</chem>                                   |
|                    | Guanine                 | Aladdin Reagent Co., Ltd     | Shanghai, China    | 99.00%                   | C5H5N5O    | 152.057 | 73-40-5   | <chem>O=C1C2=C(N=CN2)N=C(N)N1</chem>                                   |
|                    | Uracil                  | Aladdin Reagent Co., Ltd     | Shanghai, China    | 99.00%                   | C4H4N2O2   | 113.035 | 66-22-8   | <chem>O=C(N1)C=CNC1=O</chem>                                           |
|                    | Adenine                 | Aladdin Reagent Co., Ltd     | Shanghai, China    | ≥99.5% (HPLC)            | C5H5N5     | 136.062 | 73-24-5   | <chem>NC1=C2C(N=CN2)=NC=N1</chem>                                      |
| <b>Nucleosides</b> | Beta-Thymidine          | Aladdin Reagent Co., Ltd     | Shanghai, China    | 99.00%                   | C10H14N2O5 | 243.097 | 50-89-5   | <chem>O=C(C(C)=C1)NC(N1[C@H]2C[C@H](O)[C@@H](CO)O2)=O</chem>           |
|                    | Cytidine                | Aladdin Reagent Co., Ltd     | Shanghai, China    | ≥99.0% (HPLC)            | C9H13N3O5  | 244.093 | 65-46-3   | <chem>O=C(N=C(N)C=C1)N1[C@H]2[C@H](O)[C@H](O)[C@@H](CO)O2</chem>       |
|                    | Inosine                 | Sigma Aldrich                | St. Louis, MO, USA | ≥99.0% (HPLC)            | C10H12N4O5 | 269.088 | 58-63-9   | <chem>O[C@H]1[C@@H](O)[C@H](N2C(N=CNC3=O)=C3N=C2)O[C@@H]1CO</chem>     |
|                    | Xanthosine              | Aladdin Reagent Co., Ltd     | Shanghai, China    | ≥98.00% (HPLC)           | C10H12N4O6 | 285.083 | 146-80-5  | <chem>O[C@H]1[C@@H](O)[C@H](N2C(NC(NC3=O)=O)=C3N=C2)O[C@@H]1CO</chem>  |
|                    | Guanosine               | Aladdin Reagent Co., Ltd     | Shanghai, China    | 98.00%, for cell culture | C10H13N5O5 | 284.099 | 118-00-3  | <chem>O[C@@H]1[C@H](CO)O[C@@H](N2C(N=C(N)NC3=O)=C3N=C2)[C@@H]1O</chem> |
|                    | Uridine                 | Aladdin Reagent Co., Ltd     | Shanghai, China    | 99.00%, for cell culture | C9H12N2O6  | 245.077 | 58-96-8   | <chem>O[C@H]1[C@@H](O)[C@H](N2C(NC(C=O)=O)=O)O[C@@H]1CO</chem>         |
|                    | Adenosine               | Aladdin Reagent Co., Ltd     | Shanghai, China    | >99.50% (HPLC)           | C10H13N5O4 | 268.104 | 58-61-7   | <chem>O[C@@H]1[C@@H](CO)O[C@@H](N2C3=NC=NC(N)=C3N=C2)[C@@H]1O</chem>   |
| <b>Vitamins</b>    | Pyridoxine              | Sigma Aldrich                | St. Louis, MO, USA | ≥99.00%                  | C8H11NO3   | 170.081 | 65-23-6   | <chem>OCC1=C(CO)C=NC(C)=C1O</chem>                                     |

|                            |                    |                              |                    |                     |              |         |             |                                                               |
|----------------------------|--------------------|------------------------------|--------------------|---------------------|--------------|---------|-------------|---------------------------------------------------------------|
|                            | Pyridoxal          | Bide Pharmatech Ltd.         | Shanghai, China    | ≥99.00%             | C8H9NO3      | 168.066 | 66-72-8     | <chem>OCC1=C(C=O)C(O)=C(C)N=C1</chem>                         |
|                            | Pyridoxamine       | Medchemexpress               | New Jersey, USA    | ≥99.00%             | C8H12N2O2    | 169.097 | 85-87-0     | <chem>NCC1=C(CO)C=NC(C)=C1O</chem>                            |
|                            | Thiamine           | Macklin Biochemical Co., Ltd | Shanghai, China    | 98.00%              | C12H17CIN4OS | 265.112 | 59-43-8     | <chem>NC1=NC(C)=NC=C1C[N+]2=CSC(CCO)=C2C</chem>               |
|                            | Biotin             | Sigma Aldrich                | St. Louis, MO, USA | ≥98.00%             | C10H16N2O3S  | 245.096 | 58-85-5     | <chem>O=C1N[C@@]2([H])[C@]([C@H](CCCC(O)=O)SC2)([H])N1</chem> |
|                            | D-Pantothenic acid | Macklin Biochemical Co., Ltd | Shanghai, China    | ≥98.00%             | C9H17NO5     | 220.118 | 79-83-4     | <chem>CC(C)(CO)C(C(=O)NCCC(=O)O)O</chem>                      |
|                            | Nicotinic acid     | Macklin Biochemical Co., Ltd | Shanghai, China    | ≥99.50% (HPLC)      | C6H5NO2      | 124.04  | 59-67-6     | <chem>O=C(O)C1=CN=CC=C1</chem>                                |
|                            | Niacinamide        | Aladdin Reagent Co., Ltd     | Shanghai, China    | ≥99.80%             | C6H6N2O      | 123.055 | 98-92-0     | <chem>NC(C1=CN=CC=C1)=O</chem>                                |
| <b>Heterocyclic amines</b> | Harman             | TRC                          | Toronto, Canada    | 95.00%              | C12H10N2     | 183.092 | 486-84-0    | <chem>CC1=NC=C2=C1NC3=CC=CC=C23</chem>                        |
|                            | DMIP               | TRC                          | Toronto, Canada    | 98.00%              | C8H10N4      | 163.098 | 132898-04-5 | <chem>CC1=CC2=C(N=C1)N=C(N2C)N</chem>                         |
|                            | PhIP               | TRC                          | Toronto, Canada    | 98.00%              | C13H12N4     | 225.113 | 105650-23-5 | <chem>CN1C2=C(N=CC(=C2)C3=CC=CC=C3)N=C1N</chem>               |
|                            | IQ[4,5-b]          | TRC                          | Toronto, Canada    | 98.00%              | C11H10N4     | 199.098 | 156215-58-6 | <chem>CN1C2=CC3=CC=CC=C3N=C2N=C1N</chem>                      |
|                            | MeIQ               | TRC                          | Toronto, Canada    | 98.00%              | C12H12N4     | 213.114 | 77094-11-2  | <chem>CC1=CC2=C(C=CC=N2)C3=C1N(C(=N3)N)C</chem>               |
|                            | 7,8-DiMeIQx        | TRC                          | Toronto, Canada    | 98.00%              | C12H13N5     | 228.124 | 92180-79-5  | <chem>CC1=C(N=C2C(=N1)C=CC3=C2N=C(N3C)N)C</chem>              |
|                            | 8-MeIQx            | TRC                          | Toronto, Canada    | 98.00%              | C11H11N5     | 214.109 | 77500-04-0  | <chem>CC1=CN=C2C=CC3=C(C2=N1)N=C(N3C)N</chem>                 |
|                            | MeAaC              | TRC                          | Toronto, Canada    | 98.00%              | C12H11N3     | 198.103 | 68006-83-7  | <chem>CC1=CC2=C(NC3=CC=CC=C32)N=C1N</chem>                    |
|                            | IQ                 | TRC                          | Toronto, Canada    | 98.00%              | C11H10N4     | 199.098 | 76180-96-6  | <chem>CN1C2=C(C3=C(C=C2)N=CC=C3)N=C1N</chem>                  |
|                            | IQx                | TRC                          | Toronto, Canada    | 98.00%              | C10H9N5      | 200.093 | 108354-47-8 | <chem>CN1C2=C(C3=NC=CN=C3C=C2)N=C1N</chem>                    |
|                            | Phe-p-1            | TRC                          | Toronto, Canada    | 97.00%              | C11H10N2     | 171.092 | 33421-40-8  | <chem>C1=CC=C(C=C1)C2=CN=C(C=C2)N</chem>                      |
|                            | AaC                | TRC                          | Toronto, Canada    | 98.00%              | C11H9N3      | 184.087 | 26148-68-5  | <chem>C1=CC=C2C(=C1)C3=C(N2)N=C(C=C3)N</chem>                 |
|                            | Norharman          | TRC                          | Toronto, Canada    | ≥98.00%             | C11H8N2      | 169.076 | 244-63-3    | <chem>C1=CC=C2C(=C1)C3=C(N2)C=NC=C3</chem>                    |
| <b>Internal standard</b>   | Hypoxanthine-d3    | CIL                          | USA                | 2,8,9-D3, OD,98.00% | C5HD3N4O     | 139.058 | NA          | <chem>C1=NC2=C(N1)C(=O)NC=N2</chem>                           |

Table S2

| Mass spectrometry conditions                      |                                 |                                          |
|---------------------------------------------------|---------------------------------|------------------------------------------|
| Mass spectrometer                                 | Scan mode                       | Source parameters                        |
| Q Exactive HF-X                                   | ESI(+) Full MS                  | Sheath gas flow rate: 50 psi             |
|                                                   |                                 | Auxiliary gas flow rate: 1 arb           |
|                                                   |                                 | Auxiliary gas heater temperature: 370 °C |
|                                                   |                                 | Funnel RF level: 50.0                    |
|                                                   |                                 | Spray voltage: +3.6 kV                   |
| Capillary temperature: 360 °C                     |                                 |                                          |
| Liquid phase conditions                           |                                 |                                          |
| Liquid chromatography column                      | Mobile phase (A/B)              | Elution mode                             |
| Waters HSS T3 column (2.1 mm × 100 mm,<br>1.8 μm) | A: Pure water; B: Pure methanol | 5% B isocratic elution 20 min            |
|                                                   |                                 | 20% B isocratic elution 20 min           |
|                                                   |                                 | 35% B isocratic elution 20 min           |
|                                                   |                                 | 50% B isocratic elution 20 min           |
|                                                   |                                 | 65% B isocratic elution 20 min           |
|                                                   |                                 | 80% B isocratic elution 20 min           |

---

95% B isocratic elution 20 min

---

1% B: 0-1.5 min; 1-99% B: 1.5-16.5 min; 99% B: 16.5-20min

gradient elution

5% B isocratic elution 20 min

20% B isocratic elution 20 min

35% B isocratic elution 20 min

50% B isocratic elution 20 min

A: 0.1% formic acid water; B: 0.1% formic acid  
methanol

65% B isocratic elution 20 min

80% B isocratic elution 20 min

95% B isocratic elution 20 min

1% B: 0-1.5 min; 1-99% B: 1.5-16.5 min; 99% B: 16.5-20min

gradient elution

---

**Table S3: Detailed information on the training set for each model. (Excel)**

There is detailed information on the training set for each model (e.g. predicted\_values, true\_values, all selected descriptors, and original data).

**Table S4: Detailed information on the testing set for each model. (Excel)**

There is detailed information on the testing set for each model (e.g. predicted\_values, true\_values, all selected descriptors, and original data).

**Table S5: Detailed information on the outliers outside the application domain of each model. (Excel)**

There is detailed information on the outliers outside the application domain of each model (e.g. standardized residuals, leverage Value, and measured information).

**Table S6: correlation between IE of compounds and the content of organic modifiers. (Excel)**

There is a correlation between the IE of compounds and the content of organic modifiers. Correlation parameters were obtained from the correlation between the content (from 5% to 95%) of the isocratic elution mobile phase B (y-axis) and the mass spectral IE (x-axis) of the compound under this condition. Asterisks indicate that the point used for regression under this condition is less than or equal to 2.
