# Supplementary material for: Prediction of mass spectrometry ionization efficiency based on COSMO-RS and machine learning algorithms
Source: Royal Society of Chemistry journal article supplement (doi:10.1039/d4an00301b), 2024-01-01
Supplement: d4an00301b2.xlsx [file d4an00301b2.xlsx]

## Sheet: MLR-C
Compounds	Mobile phase A	Mobile phase B	Elution conditions	predicted_values	true_values	ln(gamma)	log(pv)	Total mean interaction energy in the mix (H_int)	H-Bond interaction energy in the mix (H_HB)	VdW interaction energy in the mix (H_vdW)	Gas liquid transition energy in the mix (H_glt)	w_RS	log10(S_RS)	Solvent_MolWeight	XLogP3	Hydrogen Bond Donor Count	Hydrogen Bond Acceptor Count	Rotatable Bond Count	Heavy Atom Count	Complexity	Atomic weights	E_gas	E_diel	Averaging corr dE	Area	Volume	Log(MV)	Total COSMO charge	Dipole moment t_value	Sigma2	Sigma3	Sigma4	Sigma5	H-bond moment (accept)	H-bond moment (donor)	PKA(25,H2O)	PKA(25,MeCN)	logD	WANS*10^5	丨d丨(dipole moment)	Polar Surface Area	Nitrogen Heterocycle Count	Ring Count	Nitrogen Count	Sulfur Count
D-Pantothenic acid	Pure water	Pure methanol	5% B isocratic elution	-1.18352	-0.98	-0.09	1.6	1.29	-2.7	-6.79	1.14	0	-3.82	18.72	-1.1	4	5	6	15	239	1.11e+31	-492236	-26.02	1.56	247.96	269.32	2.43	0	7.46	186	7.26	354	-39.4	8.13	8.95	6.22	23.15	-1.05	-7.18	4.69	107	0	0	1	0
niacinamide	Pure water	Pure methanol	5% B isocratic elution	0.779716	0.81	0.26	3.02	0.25	-1.35	-4.4	-0.01	0	-2.98	18.72	-0.4	1	2	1	9	114	111000000000000	-261773	-16.8	0.79	152.74	146.35	2.17	0	2.95	112	27.7	215	95.8	7.01	3.68	5.08	12.91	-3.24	-5.1	4.94	56	1	1	2	0
Pyridoxal	Pure water	Pure methanol	5% B isocratic elution	0.464718	1.03	0.89	2.47	0.7	-1.63	-5.16	-0.01	0	-3.01	18.72	0	2	4	2	12	162	1.11e+20	-370806	-16.87	1.08	190.02	193.09	2.29	0.01	3.53	121	8.31	226	-19.7	4.94	5.51	5.04	18.08	-1.4	-2.71	3.58	70.4	1	1	1	0
Pyridoxine	Pure water	Pure methanol	5% B isocratic elution	0.977008	1.43	0.3	1.77	0.21	-1.94	-5.34	-0.01	0	-3.1	18.72	-0.8	3	4	2	12	142	1.11e+22	-371565	-22.39	1.06	195.11	198.18	2.3	0	9.44	137	11.5	264	32	6.46	6.06	11.25	32	0.01	-3.22	2.9	73.6	1	1	1	0
Pyridoxamine	Pure water	Pure methanol	5% B isocratic elution	0.917549	1.22	0.41	2.14	0.28	-2.06	-5.53	-0.01	0	-3.07	18.72	-1	3	4	2	12	143	1.11e+23	-359090	-19.85	1.23	199.15	205.79	2.31	0.01	2.37	144	49.5	321	233	9.73	4.96	8.51	18.04	-0.23	-3.37	4.35	79.4	1	1	2	0
Nicotinicacid	Pure water	Pure methanol	5% B isocratic elution	0.194251	0.6	1.1	3.56	0.73	-1.23	-4.01	-0.01	0	-2.86	18.72	0.4	1	3	1	9	114	11100000000000	-274248	-12.08	0.77	149.15	142	2.15	0	0.88	92.9	1.16	177	-39.1	3.37	4.37	3.73	20.67	-2.73	-2.8	3.67	50.2	1	1	1	0
Alanine	Pure water	Pure methanol	5% B isocratic elution	-0.216748	0.13	0.61	3.79	1.39	-1.45	-3.28	1.14	0	-3.31	18.72	-3	2	3	1	6	61.8	1110000000000	-203245	-12.07	0.88	123.86	112.49	2.05	0	1.93	103	20.6	223	81.1	5.25	4.15	6.92	15.51	-0.69	-4.07	2.88	63.3	0	0	1	0
Leucine	Pure water	Pure methanol	5% B isocratic elution	0.0598065	0.56	1.54	3.98	2.19	-1.28	-4.98	1.14	0	-3.37	18.72	-1.5	2	3	3	9	101	1.11e+21	-277279	-11.49	0.91	176.64	178.51	2.25	0	1.75	97.3	10	188	15.9	4.1	4.03	4.32	23.12	-1.46	-4.42	4.6	63.3	0	0	1	0
Isoleucine	Pure water	Pure methanol	5% B isocratic elution	0.170558	0.62	1.54	3.99	2.17	-1.24	-4.94	1.14	0	-3.33	18.72	-1.7	2	3	3	9	103	1.11e+21	-277278	-11.39	0.9	174.76	177.8	2.25	0	1.86	95.2	4.07	178	-13.2	3.66	4.06	5.29	24.73	-0.48	-4.81	8.21	63.3	0	0	1	0
Valine	Pure water	Pure methanol	5% B isocratic elution	0.436837	0.55	0.76	3.48	2.07	-0.91	-4.4	1.14	0	-3.45	18.72	-2.3	2	3	2	8	90.4	1.11e+18	-252603	-16.64	0.58	154.87	154.22	2.19	0	7.95	86.9	30.2	126	74.6	3.87	1.16	5.48	13.49	-1.89	-5.23	8.12	63.3	0	0	1	0
Proline	Pure water	Pure methanol	5% B isocratic elution	0.101247	0.72	0.86	3.62	0.74	-1.34	-4.07	0.18	0	-2.99	18.72	-2.5	2	3	1	8	103	1.11e+16	-251835	-13.13	0.77	147.6	142.26	2.15	0	3.61	94.9	18	192	36.7	4.47	4	3.51	21.36	-3.35	-4.13	3.48	49.3	1	1	1	0
Phenylalanine	Pure water	Pure methanol	5% B isocratic elution	0.281921	0.48	0.96	2.97	1.09	-1.37	-5.64	-0.01	0	-3.13	18.72	-1.5	2	3	3	12	153	1.11e+22	-348280	-15.74	1.01	200.74	208.03	2.32	0	2.66	122	9.49	216	30.8	4.48	4.38	4.16	22.91	-1.94	-2.63	7.78	63.3	0	1	1	0
Methionine	Pure water	Pure methanol	5% B isocratic elution	-0.284333	0.35	0.86	3.26	1.8	-1.47	-5.4	1.14	0	-3.47	18.72	-1.9	2	4	4	9	97	1.11e+19	-502501	-15.83	1.08	186.45	185.96	2.27	0.01	4.25	126	19.1	229	42.1	4.86	4.41	4.94	22.93	-1.51	-3.09	4.05	88.6	0	0	1	1
Tryptophan	Pure water	Pure methanol	5% B isocratic elution	-0.168653	0.11	0.43	1.74	0.45	-1.58	-6.61	-0.59	0	-3.06	18.72	-1.1	3	3	3	15	245	1.11e+26	-430876	-21.02	1.24	233.33	250.05	2.4	0	5.34	153	-10.6	271	-20.2	4.73	6.7	4.11	22.25	-1.98	-4.08	5.74	79.1	1	2	2	0
Serine	Pure water	Pure methanol	5% B isocratic elution	-0.195695	-0.33	0.37	2.82	1.27	-1.52	-3.4	1.14	0	-3.36	18.72	-3.1	3	4	2	7	72.6	11100000000000	-250467	-14.94	1.06	132.32	122.02	2.09	0	3.06	118	4.07	216	-33.2	4.49	4.85	3.58	19.55	-4.08	-3.26	0.99	83.6	0	0	1	0
Glutamine	Pure water	Pure methanol	5% B isocratic elution	-0.538302	-0.3	-0.44	1.53	0.79	-2.35	-4.86	1.14	0	-3.79	18.72	-3.1	3	4	4	10	146	1.11e+19	-333835	-24.89	1.35	180.5	176.05	2.25	0	6.95	174	25	351	64	9.61	7.18	5.6	22.19	-3.61	-5.52	7.53	106	0	0	2	0
Threonine	Pure water	Pure methanol	5% B isocratic elution	-0.209262	-0.09	0.7	3.49	1.49	-1.57	-3.93	1.14	0	-3.33	18.72	-2.9	3	4	2	8	93.3	1.11e+16	-275147	-14.56	1.14	149.43	144.38	2.16	0.01	4	119	6.4	228	-10.9	5.24	4.98	2.45	17.53	-4.59	-5.42	3.68	83.6	0	0	1	0
Cysteine	Pure water	Pure methanol	5% B isocratic elution	-0.539455	-0.58	0.72	3.62	1.43	-1.15	-4.26	1.14	0	-3.18	18.72	-2.5	3	4	2	7	75.3	11100000000000	-453148	-13.45	1	147.18	141.36	2.15	0.01	3.06	108	-15.6	173	-97.6	1.79	4.69	5.27	20.11	-1.25	-3.34	5	64.3	0	0	1	1
Asparagine	Pure water	Pure methanol	5% B isocratic elution	-0.578957	-0.54	-0.64	2.07	0.53	-2.37	-4.22	1.14	0	-3.81	18.72	-3.4	3	4	3	9	134	1.11e+16	-309157	-24.85	1.33	160.84	155.26	2.19	0	3.88	177	14.7	352	34.5	9.05	7.57	3.77	19.29	-6.05	-4.96	6.4	106	0	0	2	0
Glutamicacid	Pure water	Pure methanol	5% B isocratic elution	-0.50274	-0.38	-0.26	2.12	1.3	-1.8	-4.49	1.14	0	-3.84	18.72	-3.7	3	5	4	10	145	1.11e+18	-346311	-25.1	1.06	172.73	167.41	2.22	0	8.05	150	9.3	247	-26.7	4.8	5.32	4.16	20.54	-4.48	-4.16	4.84	101	0	0	1	1
Lysine	Pure water	Pure methanol	5% B isocratic elution	-0.0254595	0.35	0.19	2.83	1.88	-1.54	-5.45	1.14	0	-3.76	18.72	-3	3	4	5	10	106	1.11e+23	-312026	-21.17	0.86	191.1	191.01	2.28	0	5.99	127	75.3	255	325	8.64	1.15	8.95	18.74	-1	-1.73	0.96	89.3	0	0	2	0
Arginine	Pure water	Pure methanol	5% B isocratic elution	0.0514614	0.93	-0.69	1.47	1.06	-2.13	-6.08	1.14	0	-3.87	18.72	-4.2	4	4	5	12	176	1.11e+25	-380778	-28.48	1.38	214.93	214.24	2.33	0	9.11	182	56.4	339	241	10.62	3.9	10.66	22.26	-2.7	-2.93	1.97	128	0	0	4	0
Histidine	Pure water	Pure methanol	5% B isocratic elution	0.422526	0.64	-0.71	1.3	0.22	-1.84	-4.99	0.18	0	-3.56	18.72	-3.2	3	4	3	11	151	1.11e+19	-344509	-27.47	0.98	180.91	181.77	2.26	0	5.04	160	36.7	296	139	8.38	4.38	5.7	14.6	-3.9	-4.52	8.26	92	1	1	3	0
Citrulline	Pure water	Pure methanol	5% B isocratic elution	-0.0523061	-0.34	-0.79	1.3	0.74	-2.82	-5.87	1.14	0	-4.05	18.72	-4.3	4	4	5	12	171	1.11e+24	-393268	-29.64	1.53	214.73	215.15	2.33	0	7.6	204	40.5	433	151	12.42	8.36	5.05	24.14	-4.38	-3.03	2.31	118	0	0	3	0
Taurine	Pure water	Pure methanol	5% B isocratic elution	-0.953105	-1.07	-0.08	3.08	1.15	-1.73	-3.64	1.14	0	-3.6	18.72	-4.1	2	4	2	7	120	11100000000000	-476406	-18.56	1.09	143.51	133.49	2.13	0.01	3.57	138	-7.89	285	-71.8	4.16	6.16	-2.47	10.55	-10.36	-3.86	3.47	88.8	0	0	1	1
Tyrosine	Pure water	Pure methanol	5% B isocratic elution	-0.023822	0.42	0.16	2.22	0.47	-2.06	-5.71	-0.01	0	-3.3	18.72	-2.3	3	4	3	13	176	1.11e+23	-395507	-20.45	1.27	210.41	219.03	2.34	0	4.34	158	-11.2	301	-58.2	5.35	7.81	4.18	23.28	-2.58	-2.6	8.84	83.6	0	1	1	0
Hypotaurine	Pure water	Pure methanol	5% B isocratic elution	-0.456366	-0.77	-0.13	3.16	0.77	-1.82	-3.8	1.14	0	-3.47	18.72	-1.5	2	4	2	6	55.5	1110000000000	-429187	-19.14	0.95	136.46	125.99	2.1	0	5.56	129	43.8	272	164	8.05	3.84	8.34	19	-1.9	-2.55	5.19	82.5	0	0	1	1
L-Hydroxyproline	Pure water	Pure methanol	5% B isocratic elution	-0.138412	-0.08	-0.01	2.82	0.08	-2.1	-4.12	0.18	0	-3.23	18.72	-3.3	3	4	1	9	125	1.11e+17	-299059	-18.75	1.12	155.95	154.27	2.19	0	3.05	140	34.4	301	118	8.1	5.75	7.9	18.5	-1.19	-2.19	3.72	69.6	1	1	1	0
N-omiga-acetylhistamine	Pure water	Pure methanol	5% B isocratic elution	0.852352	1.46	-0.37	2.28	0.45	-1.97	-5.69	0.18	0	-3.54	18.72	-0.4	2	2	3	11	138	1.11e+21	-321960	-23.57	0.83	195.51	194.44	2.29	0	4.66	148	58.4	320	214	11.2	4.88	6.06	14.64	-2.8	-2.61	4.77	57.8	1	1	3	0
L-pyroglutamicacid	Pure water	Pure methanol	5% B isocratic elution	-0.491744	-0.41	-0.15	2.43	0.17	-1.85	-3.98	0.18	0	-3.31	18.72	-0.8	2	3	1	9	154	1110000000000000	-298326	-20.95	0.96	151.34	146.44	2.17	0	7.17	137	11.3	267	-26.3	6.36	6.48	3.66	21.17	-4.87	-2.3	6.22	66.4	1	1	1	0
Tyramine	Pure water	Pure methanol	5% B isocratic elution	0.276857	0.61	1.07	3.22	0.89	-1.34	-5.33	-0.01	0	-3.06	18.72	1.1	2	2	2	10	87.3	1.11e+20	-277120	-13.98	0.82	183.62	181.83	2.26	0	2.6	106	27.2	227	168	5.88	3.52	8.82	18.57	0.95	-2.63	3.17	46.2	0	1	1	0
Histamine	Pure water	Pure methanol	5% B isocratic elution	0.423963	-0.22	-0.06	2.94	0.39	-1.64	-4.52	0.18	0	-3.23	18.72	-0.7	2	2	2	8	64.7	1.11e+16	-226118	-18.32	0.8	155.19	146.49	2.17	0	4.89	122	68.6	307	360	10.5	2.98	8.7	18.47	-1.26	-2.85	4.92	54.7	1	1	3	0
IQx	Pure water	Pure methanol	5% B isocratic elution	0.912988	0.31	0.06	0.96	-0.6	-1.65	-6.32	-1.36	0	-2.68	18.72	0.6	1	4	0	15	246	1.11e+23	-414479	-25.04	0.93	218.25	227.81	2.36	0.01	8.8	141	56.1	274	235	9.64	3.08	5.71	14.84	-2.23	-2.75	8.88	69.6	2	3	5	0
DMIP	Pure water	Pure methanol	5% B isocratic elution	1.16925	1.05	-0.01	1.51	0.03	-1.64	-5.7	-0.59	0	-3.03	18.72	1	1	3	0	12	172	1.11e+21	-332645	-25.27	0.81	195.56	198.01	2.3	0.01	9.99	128	57.4	269	243	9.75	3.19	7.16	17.5	-1.15	-4.24	10.15	56.7	2	2	4	0
Sarcosine	Pure water	Pure methanol	5% B isocratic elution	-0.301339	0.13	0.78	4.28	1.53	-1.36	-3.42	1.14	0	-3.34	18.72	-2.8	2	3	2	6	52.8	1110000000000	-203238	-12.38	0.78	127.98	113.01	2.05	0	2.92	94.2	17.5	201	42.4	4.57	4.19	4.37	24.65	-2.74	-4.93	8.22	49.3	0	0	1	0
Creatinine	Pure water	Pure methanol	5% B isocratic elution	0.740699	1.49	-0.93	1.29	-0.34	-2.09	-4.1	0.18	0	-3.46	18.72	-1.8	1	1	0	8	151	111000000000000	-248681	-30.05	0.8	143.83	134.46	2.13	0	11.98	146	74.4	333	274	12.86	4.35	5.11	15.98	-5.3	-5.49	12.08	58.7	1	1	3	0
L-dihydrooroticacid	Pure water	Pure methanol	5% B isocratic elution	-1.55473	-1.22	-0.45	1.72	-0.25	-2.16	-4.21	-0.01	0	-3.34	18.72	-1.5	3	4	1	11	225	1.11e+16	-379565	-23.86	1.38	167.39	163.4	2.21	0.01	5.18	172	-17.2	327	-144	5.51	8.7	2.35	17.25	-6.68	-4.92	4.87	95.5	1	1	2	0
L-Carnosine	Pure water	Pure methanol	5% B isocratic elution	0.173606	0.22	-1.25	-0.26	-0.1	-3.18	-6.99	0.18	0	-3.94	18.72	-4	4	5	6	16	259	1.11e+29	-499765	-38.44	1.62	256.29	270.05	2.43	0	12.99	233	51	527	223	14.27	9.82	9.18	20.43	-2.61	-2.2	9.07	121	1	1	4	0
Betaine	Pure water	Pure methanol	5% B isocratic elution	0.917727	1.31	-2.41	-0.47	0.29	-2.8	-4.41	1.14	0	-4.33	18.72	0.5	0	2	1	8	87.6	1.11e+18	-252565	-41.59	0.81	153.39	154.86	2.19	0	15.35	178	181	468	789	21.46	0.08	1.63	14.25	-9.97	-2.66	15.47	40.1	0	0	1	0
Cytosine	Pure water	Pure methanol	5% B isocratic elution	0.679381	1.52	-0.82	0.33	-1.14	-2.46	-3.89	-0.01	0	-3.42	18.72	-1.7	2	2	0	8	170	1110000000000	-247927	-34.38	0.87	136.73	126.12	2.1	0	12.89	167	25.9	432	122	12.95	9.67	6.77	18.33	-4	-2.61	13.02	67.5	1	1	3	0
Hypoxanthine	Pure water	Pure methanol	5% B isocratic elution	0.0941246	-0.02	-0.64	1.31	-1.16	-2.05	-4.14	-0.59	0	-3.06	18.72	-0.5	2	3	0	10	190	11100000000000	-305849	-25.27	0.97	150.2	143.93	2.16	0.01	2.51	159	5.76	351	-26.8	8.83	8.14	3.33	11.33	-6.92	-2.86	2.6	70.1	2	2	4	0
Xanthine	Pure water	Pure methanol	5% B isocratic elution	-0.433313	-0.9	-0.53	1.37	-1.1	-2.05	-4.37	-0.59	0	-2.99	18.72	-0.7	3	3	0	11	217	111000000000000	-353097	-23.72	1.25	159.89	153.96	2.19	0.01	6.06	170	-15.1	367	-128	7.64	10.2	7.74	22.93	-2.99	-2.73	6.1	86.9	2	2	4	0
Guanine	Pure water	Pure methanol	5% B isocratic elution	0.195669	0.52	-1.02	0.35	-1.62	-2.53	-4.56	-0.59	0	-3.17	18.72	-1.1	3	3	0	11	225	1110000000000000	-340610	-30.43	1.22	164.42	158.81	2.2	0.01	3.28	191	-7.34	441	-50.1	10.78	11.63	4.81	13.86	-5.99	-2.81	3.34	96.2	2	2	5	0
Adenine	Pure water	Pure methanol	5% B isocratic elution	1.06571	1.24	-0.84	0.65	-1.29	-2.17	-4.34	-0.59	0	-3	18.72	-0.1	2	4	0	10	127	111000000000000	-293365	-30.51	0.99	153.88	148.09	2.17	0	11.17	161	9.31	380	47.5	10.2	8.73	5.5	15	-4.52	-2.45	11.33	80.5	2	2	5	0
Cytidine	Pure water	Pure methanol	5% B isocratic elution	-0.461907	-0.09	-1.13	-2.05	-1.54	-3.15	-6.51	-0.97	0	-3.21	18.72	-2.1	4	5	2	17	383	1.11e+29	-559442	-33.42	1.74	241.37	261.47	2.42	0.01	6.86	228	40.6	467	146	13.35	9.24	15.82	45.67	-2.4	-3.46	9.4	129	1	2	3	0
Inosine	Pure water	Pure methanol	5% B isocratic elution	-1.25444	-2.24	-1.35	-1.34	-1.98	-3.26	-6.93	-1.55	0	-3.09	18.72	-1.3	4	7	2	19	405	1.11e+30	-617361	-37.38	1.8	261.27	285.84	2.46	0.01	9.42	243	21.5	459	3.18	11.36	10.23	10.31	29.87	-2.75	-2.08	9.18	129	2	3	4	0
Xanthosine	Pure water	Pure methanol	5% B isocratic elution	-1.1203	-1.56	-1.16	-1.92	-1.7	-3.18	-6.96	-1.55	0	-3.07	18.72	-2.4	5	7	2	20	434	1.11e+31	-664603	-37.75	1.91	265.99	291.82	2.47	0.01	15.45	240	28.5	439	14	11	9.33	12.24	32.43	-2.45	-3.34	12.18	146	2	3	4	0
Guanosine	Pure water	Pure methanol	5% B isocratic elution	-0.88152	-0.85	-1.67	-2.39	-2.33	-3.56	-7.37	-1.55	0	-3.14	18.72	-1.9	5	7	2	20	446	1.11e+32	-652123	-42.64	2.09	276.17	298.73	2.48	0.01	11.43	271	-5.63	543	-85.9	12.26	14.35	13.14	36.02	-2.86	-2.22	11.13	155	2	3	5	0
Uridine	Pure water	Pure methanol	5% B isocratic elution	-1.37593	-1.54	-0.27	-0.25	-0.45	-2.21	-6.23	-0.97	0	-3.04	18.72	-2	4	6	2	17	371	1.11e+28	-571934	-25.98	1.71	235.87	256.94	2.41	0.01	5.57	194	28.6	328	37.3	8.29	6.3	11.64	34.25	-0.98	-1.56	4.28	119	1	2	2	0
Adenosine	Pure water	Pure methanol	5% B isocratic elution	-0.361225	0.42	-0.07	0.66	-0.9	-2.1	-6.97	-1.55	0	-2.53	18.72	-1.1	4	8	2	19	335	1.11e+31	-604889	-23.66	1.73	253.58	283.19	2.45	0.01	2.18	191	36.3	322	107	8.99	5.54	14.19	39.95	-0.74	-3.53	3.84	140	2	3	5	0
D-Pantothenic acid	Pure water	Pure methanol	20% B isocratic elution	-1.13031	-0.93	-0.99	1.6	0.55	-2.4	-7.07	1.14	0	-3.46	20.82	-1.1	4	5	6	15	239	1.11e+31	-492236	-26.02	1.56	247.96	269.32	2.43	0	7.46	186	7.26	354	-39.4	8.13	8.95	6.22	23.15	-1.05	-7.18	4.69	107	0	0	1	0
niacinamide	Pure water	Pure methanol	20% B isocratic elution	0.783698	0.6	-0.22	3.02	-0.1	-1.18	-4.54	-0.01	0	-2.8	20.82	-0.4	1	2	1	9	114	111000000000000	-261773	-16.8	0.79	152.74	146.35	2.17	0	2.95	112	27.7	215	95.8	7.01	3.68	5.08	12.91	-3.24	-5.1	4.94	56	1	1	2	0
Pyridoxal	Pure water	Pure methanol	20% B isocratic elution	0.485934	0.99	0.03	2.47	-0.03	-1.45	-5.4	-0.01	0	-2.67	20.82	0	2	4	2	12	162	1.11e+20	-370806	-16.87	1.08	190.02	193.09	2.29	0.01	3.53	121	8.31	226	-19.7	4.94	5.51	5.04	18.08	-1.4	-2.71	3.58	70.4	1	1	1	0
Pyridoxine	Pure water	Pure methanol	20% B isocratic elution	0.978443	1.41	-0.44	1.77	-0.39	-1.74	-5.57	-0.01	0	-2.82	20.82	-0.8	3	4	2	12	142	1.11e+22	-371565	-22.39	1.06	195.11	198.18	2.3	0	9.44	137	11.5	264	32	6.46	6.06	11.25	32	0.01	-3.22	2.9	73.6	1	1	1	0
Pyridoxamine	Pure water	Pure methanol	20% B isocratic elution	0.949507	1.2	-0.35	2.14	-0.34	-1.84	-5.75	-0.01	0	-2.77	20.82	-1	3	4	2	12	143	1.11e+23	-359090	-19.85	1.23	199.15	205.79	2.31	0.01	2.37	144	49.5	321	233	9.73	4.96	8.51	18.04	-0.23	-3.37	4.35	79.4	1	1	2	0
Nicotinicacid	Pure water	Pure methanol	20% B isocratic elution	0.19156	0.44	0.38	3.56	0.11	-1.11	-4.21	-0.01	0	-2.58	20.82	0.4	1	3	1	9	114	11100000000000	-274248	-12.08	0.77	149.15	142	2.15	0	0.88	92.9	1.16	177	-39.1	3.37	4.37	3.73	20.67	-2.73	-2.8	3.67	50.2	1	1	1	0
Alanine	Pure water	Pure methanol	20% B isocratic elution	-0.224793	0.05	0.1	3.79	1.03	-1.3	-3.42	1.14	0	-3.12	20.82	-3	2	3	1	6	61.8	1110000000000	-203245	-12.07	0.88	123.86	112.49	2.05	0	1.93	103	20.6	223	81.1	5.25	4.15	6.92	15.51	-0.69	-4.07	2.88	63.3	0	0	1	0
Leucine	Pure water	Pure methanol	20% B isocratic elution	0.141186	0.45	0.58	3.98	1.36	-1.14	-5.16	1.14	0	-2.98	20.82	-1.5	2	3	3	9	101	1.11e+21	-277279	-11.49	0.91	176.64	178.51	2.25	0	1.75	97.3	10	188	15.9	4.1	4.03	4.32	23.12	-1.46	-4.42	4.6	63.3	0	0	1	0
Isoleucine	Pure water	Pure methanol	20% B isocratic elution	0.255916	0.47	0.58	3.99	1.34	-1.1	-5.11	1.14	0	-2.95	20.82	-1.7	2	3	3	9	103	1.11e+21	-277278	-11.39	0.9	174.76	177.8	2.25	0	1.86	95.2	4.07	178	-13.2	3.66	4.06	5.29	24.73	-0.48	-4.81	8.21	63.3	0	0	1	0
Valine	Pure water	Pure methanol	20% B isocratic elution	0.440481	0.36	0.11	3.48	1.57	-0.79	-4.55	1.14	0	-3.2	20.82	-2.3	2	3	2	8	90.4	1.11e+18	-252603	-16.64	0.58	154.87	154.22	2.19	0	7.95	86.9	30.2	126	74.6	3.87	1.16	5.48	13.49	-1.89	-5.23	8.12	63.3	0	0	1	0
Proline	Pure water	Pure methanol	20% B isocratic elution	0.113941	0.46	0.19	3.62	0.22	-1.19	-4.23	0.18	0	-2.74	20.82	-2.5	2	3	1	8	103	1.11e+16	-251835	-13.13	0.77	147.6	142.26	2.15	0	3.61	94.9	18	192	36.7	4.47	4	3.51	21.36	-3.35	-4.13	3.48	49.3	1	1	1	0
Phenylalanine	Pure water	Pure methanol	20% B isocratic elution	0.311603	0.34	0.05	2.97	0.3	-1.22	-5.87	-0.01	0	-2.77	20.82	-1.5	2	3	3	12	153	1.11e+22	-348280	-15.74	1.01	200.74	208.03	2.32	0	2.66	122	9.49	216	30.8	4.48	4.38	4.16	22.91	-1.94	-2.63	7.78	63.3	0	1	1	0
Methionine	Pure water	Pure methanol	20% B isocratic elution	-0.26366	0.16	0.04	3.26	1.12	-1.31	-5.61	1.14	0	-3.15	20.82	-1.9	2	4	4	9	97	1.11e+19	-502501	-15.83	1.08	186.45	185.96	2.27	0.01	4.25	126	19.1	229	42.1	4.86	4.41	4.94	22.93	-1.51	-3.09	4.05	88.6	0	0	1	1
Tryptophan	Pure water	Pure methanol	20% B isocratic elution	-0.13364	-0.04	-0.5	1.74	-0.39	-1.42	-6.86	-0.59	0	-2.69	20.82	-1.1	3	3	3	15	245	1.11e+26	-430876	-21.02	1.24	233.33	250.05	2.4	0	5.34	153	-10.6	271	-20.2	4.73	6.7	4.11	22.25	-1.98	-4.08	5.74	79.1	1	2	2	0
Serine	Pure water	Pure methanol	20% B isocratic elution	-0.234005	-0.35	-0.11	2.82	0.95	-1.35	-3.57	1.14	0	-3.19	20.82	-3.1	3	4	2	7	72.6	11100000000000	-250467	-14.94	1.06	132.32	122.02	2.09	0	3.06	118	4.07	216	-33.2	4.49	4.85	3.58	19.55	-4.08	-3.26	0.99	83.6	0	0	1	0
Glutamine	Pure water	Pure methanol	20% B isocratic elution	-0.553558	-0.54	-0.83	1.53	0.57	-2.08	-5.04	1.14	0	-3.65	20.82	-3.1	3	4	4	10	146	1.11e+19	-333835	-24.89	1.35	180.5	176.05	2.25	0	6.95	174	25	351	64	9.61	7.18	5.6	22.19	-3.61	-5.52	7.53	106	0	0	2	0
Threonine	Pure water	Pure methanol	20% B isocratic elution	-0.19867	-0.32	0.05	3.49	0.99	-1.39	-4.11	1.14	0	-3.08	20.82	-2.9	3	4	2	8	93.3	1.11e+16	-275147	-14.56	1.14	149.43	144.38	2.16	0.01	4	119	6.4	228	-10.9	5.24	4.98	2.45	17.53	-4.59	-5.42	3.68	83.6	0	0	1	0
Cysteine	Pure water	Pure methanol	20% B isocratic elution	-0.553927	-0.83	0.07	3.62	0.9	-1.02	-4.45	1.14	0	-2.93	20.82	-2.5	3	4	2	7	75.3	11100000000000	-453148	-13.45	1	147.18	141.36	2.15	0.01	3.06	108	-15.6	173	-97.6	1.79	4.69	5.27	20.11	-1.25	-3.34	5	64.3	0	0	1	1
Asparagine	Pure water	Pure methanol	20% B isocratic elution	-0.645917	-0.79	-0.83	2.07	0.51	-2.11	-4.39	1.14	0	-3.76	20.82	-3.4	3	4	3	9	134	1.11e+16	-309157	-24.85	1.33	160.84	155.26	2.19	0	3.88	177	14.7	352	34.5	9.05	7.57	3.77	19.29	-6.05	-4.96	6.4	106	0	0	2	0
Glutamicacid	Pure water	Pure methanol	20% B isocratic elution	-0.578327	-0.69	-0.66	2.12	1.07	-1.6	-4.69	1.14	0	-3.71	20.82	-3.7	3	5	4	10	145	1.11e+18	-346311	-25.1	1.06	172.73	167.41	2.22	0	8.05	150	9.3	247	-26.7	4.8	5.32	4.16	20.54	-4.48	-4.16	4.84	101	0	0	1	1
Lysine	Pure water	Pure methanol	20% B isocratic elution	0.000596857	0.27	-0.46	2.83	1.4	-1.35	-5.61	1.14	0	-3.51	20.82	-3	3	4	5	10	106	1.11e+23	-312026	-21.17	0.86	191.1	191.01	2.28	0	5.99	127	75.3	255	325	8.64	1.15	8.95	18.74	-1	-1.73	0.96	89.3	0	0	2	0
Arginine	Pure water	Pure methanol	20% B isocratic elution	0.0414261	0.83	-1.16	1.47	0.82	-1.86	-6.25	1.14	0	-3.7	20.82	-4.2	4	4	5	12	176	1.11e+25	-380778	-28.48	1.38	214.93	214.24	2.33	0	9.11	182	56.4	339	241	10.62	3.9	10.66	22.26	-2.7	-2.93	1.97	128	0	0	4	0
Histidine	Pure water	Pure methanol	20% B isocratic elution	0.36864	0.61	-0.98	1.3	0.09	-1.62	-5.16	0.18	0	-3.47	20.82	-3.2	3	4	3	11	151	1.11e+19	-344509	-27.47	0.98	180.91	181.77	2.26	0	5.04	160	36.7	296	139	8.38	4.38	5.7	14.6	-3.9	-4.52	8.26	92	1	1	3	0
Citrulline	Pure water	Pure methanol	20% B isocratic elution	-0.0589241	-0.63	-1.23	1.3	0.48	-2.51	-6.07	1.14	0	-3.9	20.82	-4.3	4	4	5	12	171	1.11e+24	-393268	-29.64	1.53	214.73	215.15	2.33	0	7.6	204	40.5	433	151	12.42	8.36	5.05	24.14	-4.38	-3.03	2.31	118	0	0	3	0
Taurine	Pure water	Pure methanol	20% B isocratic elution	-1.01829	-1.38	-0.45	3.08	0.92	-1.56	-3.82	1.14	0	-3.47	20.82	-4.1	2	4	2	7	120	11100000000000	-476406	-18.56	1.09	143.51	133.49	2.13	0.01	3.57	138	-7.89	285	-71.8	4.16	6.16	-2.47	10.55	-10.36	-3.86	3.47	88.8	0	0	1	1
Tyrosine	Pure water	Pure methanol	20% B isocratic elution	-0.0116928	0.48	-0.61	2.22	-0.19	-1.85	-5.96	-0.01	0	-3	20.82	-2.3	3	4	3	13	176	1.11e+23	-395507	-20.45	1.27	210.41	219.03	2.34	0	4.34	158	-11.2	301	-58.2	5.35	7.81	4.18	23.28	-2.58	-2.6	8.84	83.6	0	1	1	0
Hypotaurine	Pure water	Pure methanol	20% B isocratic elution	-0.508408	-1.06	-0.42	3.16	0.65	-1.61	-3.95	1.14	0	-3.38	20.82	-1.5	2	4	2	6	55.5	1110000000000	-429187	-19.14	0.95	136.46	125.99	2.1	0	5.56	129	43.8	272	164	8.05	3.84	8.34	19	-1.9	-2.55	5.19	82.5	0	0	1	1
L-Hydroxyproline	Pure water	Pure methanol	20% B isocratic elution	-0.160623	-0.34	-0.46	2.82	-0.22	-1.88	-4.3	0.18	0	-3.07	20.82	-3.3	3	4	1	9	125	1.11e+17	-299059	-18.75	1.12	155.95	154.27	2.19	0	3.05	140	34.4	301	118	8.1	5.75	7.9	18.5	-1.19	-2.19	3.72	69.6	1	1	1	0
N-omiga-acetylhistamine	Pure water	Pure methanol	20% B isocratic elution	0.862732	1.48	-0.87	2.28	0.07	-1.75	-5.86	0.18	0	-3.36	20.82	-0.4	2	2	3	11	138	1.11e+21	-321960	-23.57	0.83	195.51	194.44	2.29	0	4.66	148	58.4	320	214	11.2	4.88	6.06	14.64	-2.8	-2.61	4.77	57.8	1	1	3	0
L-pyroglutamicacid	Pure water	Pure methanol	20% B isocratic elution	-0.545712	-0.72	-0.51	2.43	-0.05	-1.65	-4.16	0.18	0	-3.19	20.82	-0.8	2	3	1	9	154	1110000000000000	-298326	-20.95	0.96	151.34	146.44	2.17	0	7.17	137	11.3	267	-26.3	6.36	6.48	3.66	21.17	-4.87	-2.3	6.22	66.4	1	1	1	0
Tyramine	Pure water	Pure methanol	20% B isocratic elution	0.326643	0.6	0.21	3.22	0.15	-1.21	-5.51	-0.01	0	-2.72	20.82	1.1	2	2	2	10	87.3	1.11e+20	-277120	-13.98	0.82	183.62	181.83	2.26	0	2.6	106	27.2	227	168	5.88	3.52	8.82	18.57	0.95	-2.63	3.17	46.2	0	1	1	0
Histamine	Pure water	Pure methanol	20% B isocratic elution	0.425352	-0.2	-0.51	2.94	0.07	-1.47	-4.65	0.18	0	-3.07	20.82	-0.7	2	2	2	8	64.7	1.11e+16	-226118	-18.32	0.8	155.19	146.49	2.17	0	4.89	122	68.6	307	360	10.5	2.98	8.7	18.47	-1.26	-2.85	4.92	54.7	1	1	3	0
IQx	Pure water	Pure methanol	20% B isocratic elution	0.949155	1.31	-0.65	0.96	-1.21	-1.45	-6.52	-1.36	0	-2.41	20.82	0.6	1	4	0	15	246	1.11e+23	-414479	-25.04	0.93	218.25	227.81	2.36	0.01	8.8	141	56.1	274	235	9.64	3.08	5.71	14.84	-2.23	-2.75	8.88	69.6	2	3	5	0
8-MeIQx	Pure water	Pure methanol	20% B isocratic elution	1.04706	1.22	-0.61	0.92	-1.13	-1.48	-7.15	-1.36	0	-2.38	20.82	1	1	4	0	16	271	1.11e+26	-439162	-25.13	0.98	237.6	249.06	2.4	0.01	7.72	142	63.8	281	265	10.06	2.97	5.88	15.22	-1.59	-1.95	7.78	69.6	2	3	5	0
IQ[4,5-b]	Pure water	Pure methanol	20% B isocratic elution	0.92061	1.13	-0.68	0.7	-1.23	-1.39	-6.77	-1.36	0	-2.45	20.82	1.7	1	3	0	15	245	1.11e+24	-404413	-27.45	0.9	223.43	232.81	2.37	0	10.84	139	39.2	269	182	8.87	4.02	6.83	16.69	-0.82	-4.58	11	56.7	2	3	4	0
IQ	Pure water	Pure methanol	20% B isocratic elution	1.04556	1.35	-0.2	1.43	-1.13	-1.07	-6.76	-1.36	0	-2.12	20.82	1.5	1	3	0	15	245	1.11e+24	-404413	-20.86	0.92	222.22	233.02	2.37	0	8.83	123	32.7	213	148	6.9	2.78	7	15.75	-0.15	-2.69	8.95	56.7	2	3	4	0
Norharman	Pure water	Pure methanol	20% B isocratic elution	0.98796	0.93	0.45	2.73	-0.87	-0.67	-6.08	-1.36	0	-2.01	20.82	3.2	1	1	0	13	193	1.11e+20	-334905	-13.23	0.56	196.55	201.82	2.3	0	4.61	85.1	3.38	142	46.2	3.74	2.88	7.61	16.32	1.37	-4.84	4.64	28.7	2	3	2	0
DMIP	Pure water	Pure methanol	20% B isocratic elution	1.20147	1.43	-0.64	1.51	-0.5	-1.46	-5.87	-0.59	0	-2.79	20.82	1	1	3	0	12	172	1.11e+21	-332645	-25.27	0.81	195.56	198.01	2.3	0.01	9.99	128	57.4	269	243	9.75	3.19	7.16	17.5	-1.15	-4.24	10.15	56.7	2	2	4	0
Sarcosine	Pure water	Pure methanol	20% B isocratic elution	-0.319853	0.05	0.22	4.28	1.12	-1.22	-3.58	1.14	0	-3.13	20.82	-2.8	2	3	2	6	52.8	1110000000000	-203238	-12.38	0.78	127.98	113.01	2.05	0	2.92	94.2	17.5	201	42.4	4.57	4.19	4.37	24.65	-2.74	-4.93	8.22	49.3	0	0	1	0
Creatinine	Pure water	Pure methanol	20% B isocratic elution	0.69303	1.27	-0.99	1.29	-0.27	-1.86	-4.21	0.18	0	-3.46	20.82	-1.8	1	1	0	8	151	111000000000000	-248681	-30.05	0.8	143.83	134.46	2.13	0	11.98	146	74.4	333	274	12.86	4.35	5.11	15.98	-5.3	-5.49	12.08	58.7	1	1	3	0
L-Carnosine	Pure water	Pure methanol	20% B isocratic elution	0.158155	0.27	-1.73	-0.26	-0.44	-2.84	-7.25	0.18	0	-3.77	20.82	-4	4	5	6	16	259	1.11e+29	-499765	-38.44	1.62	256.29	270.05	2.43	0	12.99	233	51	527	223	14.27	9.82	9.18	20.43	-2.61	-2.2	9.07	121	1	1	4	0
Betaine	Pure water	Pure methanol	20% B isocratic elution	0.822925	0.69	-2.23	-0.47	0.56	-2.53	-4.54	1.14	0	-4.44	20.82	0.5	0	2	1	8	87.6	1.11e+18	-252565	-41.59	0.81	153.39	154.86	2.19	0	15.35	178	181	468	789	21.46	0.08	1.63	14.25	-9.97	-2.66	15.47	40.1	0	0	1	0
Cytosine	Pure water	Pure methanol	20% B isocratic elution	0.635969	1.19	-0.75	0.33	-1.01	-2.22	-3.99	-0.01	0	-3.48	20.82	-1.7	2	2	0	8	170	1110000000000	-247927	-34.38	0.87	136.73	126.12	2.1	0	12.89	167	25.9	432	122	12.95	9.67	6.77	18.33	-4	-2.61	13.02	67.5	1	1	3	0
Hypoxanthine	Pure water	Pure methanol	20% B isocratic elution	0.0327575	0.12	-0.72	1.31	-1.14	-1.82	-4.28	-0.59	0	-3.06	20.82	-0.5	2	3	0	10	190	11100000000000	-305849	-25.27	0.97	150.2	143.93	2.16	0.01	2.51	159	5.76	351	-26.8	8.83	8.14	3.33	11.33	-6.92	-2.86	2.6	70.1	2	2	4	0
Xanthine	Pure water	Pure methanol	20% B isocratic elution	-0.470069	-0.25	-0.71	1.37	-1.16	-1.8	-4.52	-0.59	0	-2.94	20.82	-0.7	3	3	0	11	217	111000000000000	-353097	-23.72	1.25	159.89	153.96	2.19	0.01	6.06	170	-15.1	367	-128	7.64	10.2	7.74	22.93	-2.99	-2.73	6.1	86.9	2	2	4	0
Guanine	Pure water	Pure methanol	20% B isocratic elution	0.152174	0.74	-1.03	0.35	-1.53	-2.25	-4.69	-0.59	0	-3.2	20.82	-1.1	3	3	0	11	225	1110000000000000	-340610	-30.43	1.22	164.42	158.81	2.2	0.01	3.28	191	-7.34	441	-50.1	10.78	11.63	4.81	13.86	-5.99	-2.81	3.34	96.2	2	2	5	0
Adenine	Pure water	Pure methanol	20% B isocratic elution	1.04463	1.49	-0.94	0.65	-1.32	-1.93	-4.46	-0.59	0	-2.99	20.82	-0.1	2	4	0	10	127	111000000000000	-293365	-30.51	0.99	153.88	148.09	2.17	0	11.17	161	9.31	380	47.5	10.2	8.73	5.5	15	-4.52	-2.45	11.33	80.5	2	2	5	0
Beta-Thymidine	Pure water	Pure methanol	20% B isocratic elution	-1.23066	-0.74	-0.87	1.16	-0.99	-1.9	-7.06	-0.97	0	-2.72	20.82	-1.2	3	5	2	17	381	1.11e+30	-549390	-24.52	1.42	246.36	266.66	2.43	0.01	4.01	176	50.1	310	96.6	9.28	5.39	15.53	45.1	-0.93	-3.96	6.43	99.1	1	2	2	0
Cytidine	Pure water	Pure methanol	20% B isocratic elution	-0.470238	-0.13	-1.62	-2.05	-1.88	-2.8	-6.77	-0.97	0	-3.03	20.82	-2.1	4	5	2	17	383	1.11e+29	-559442	-33.42	1.74	241.37	261.47	2.42	0.01	6.86	228	40.6	467	146	13.35	9.24	15.82	45.67	-2.4	-3.46	9.4	129	1	2	3	0
Inosine	Pure water	Pure methanol	20% B isocratic elution	-1.26864	-0.77	-1.84	-1.34	-2.33	-2.88	-7.22	-1.55	0	-2.91	20.82	-1.3	4	7	2	19	405	1.11e+30	-617361	-37.38	1.8	261.27	285.84	2.46	0.01	9.42	243	21.5	459	3.18	11.36	10.23	10.31	29.87	-2.75	-2.08	9.18	129	2	3	4	0
Xanthosine	Pure water	Pure methanol	20% B isocratic elution	-1.14237	-1	-1.73	-1.92	-2.13	-2.81	-7.28	-1.55	0	-2.85	20.82	-2.4	5	7	2	20	434	1.11e+31	-664603	-37.75	1.91	265.99	291.82	2.47	0.01	15.45	240	28.5	439	14	11	9.33	12.24	32.43	-2.45	-3.34	12.18	146	2	3	4	0
Guanosine	Pure water	Pure methanol	20% B isocratic elution	-0.888818	-0.4	-2.14	-2.39	-2.69	-3.17	-7.67	-1.55	0	-2.96	20.82	-1.9	5	7	2	20	446	1.11e+32	-652123	-42.64	2.09	276.17	298.73	2.48	0.01	11.43	271	-5.63	543	-85.9	12.26	14.35	13.14	36.02	-2.86	-2.22	11.13	155	2	3	5	0
Uridine	Pure water	Pure methanol	20% B isocratic elution	-1.38172	-0.65	-1.01	-0.25	-1.04	-1.93	-6.52	-0.97	0	-2.75	20.82	-2	4	6	2	17	371	1.11e+28	-571934	-25.98	1.71	235.87	256.94	2.41	0.01	5.57	194	28.6	328	37.3	8.29	6.3	11.64	34.25	-0.98	-1.56	4.28	119	1	2	2	0
Adenosine	Pure water	Pure methanol	20% B isocratic elution	-0.304938	0.38	-0.96	0.66	-1.65	-1.83	-7.23	-1.55	0	-2.18	20.82	-1.1	4	8	2	19	335	1.11e+31	-604889	-23.66	1.73	253.58	283.19	2.45	0.01	2.18	191	36.3	322	107	8.99	5.54	14.19	39.95	-0.74	-3.53	3.84	140	2	3	5	0
D-Pantothenic acid	Pure water	Pure methanol	35% B isocratic elution	-1.08328	-1.07	-1.33	1.6	0.14	-2.19	-7.23	1.14	0	-3.34	22.92	-1.1	4	5	6	15	239	1.11e+31	-492236	-26.02	1.56	247.96	269.32	2.43	0	7.46	186	7.26	354	-39.4	8.13	8.95	6.22	23.15	-1.05	-7.18	4.69	107	0	0	1	0
niacinamide	Pure water	Pure methanol	35% B isocratic elution	0.782278	0.63	-0.4	3.02	-0.28	-1.05	-4.62	-0.01	0	-2.76	22.92	-0.4	1	2	1	9	114	111000000000000	-261773	-16.8	0.79	152.74	146.35	2.17	0	2.95	112	27.7	215	95.8	7.01	3.68	5.08	12.91	-3.24	-5.1	4.94	56	1	1	2	0
Pyridoxal	Pure water	Pure methanol	35% B isocratic elution	0.508209	0.98	-0.36	2.47	-0.46	-1.31	-5.54	-0.01	0	-2.54	22.92	0	2	4	2	12	162	1.11e+20	-370806	-16.87	1.08	190.02	193.09	2.29	0.01	3.53	121	8.31	226	-19.7	4.94	5.51	5.04	18.08	-1.4	-2.71	3.58	70.4	1	1	1	0
Pyridoxine	Pure water	Pure methanol	35% B isocratic elution	0.996821	1.47	-0.74	1.77	-0.73	-1.58	-5.71	-0.01	0	-2.71	22.92	-0.8	3	4	2	12	142	1.11e+22	-371565	-22.39	1.06	195.11	198.18	2.3	0	9.44	137	11.5	264	32	6.46	6.06	11.25	32	0.01	-3.22	2.9	73.6	1	1	1	0
Pyridoxamine	Pure water	Pure methanol	35% B isocratic elution	0.979588	1.25	-0.67	2.14	-0.69	-1.67	-5.88	-0.01	0	-2.66	22.92	-1	3	4	2	12	143	1.11e+23	-359090	-19.85	1.23	199.15	205.79	2.31	0.01	2.37	144	49.5	321	233	9.73	4.96	8.51	18.04	-0.23	-3.37	4.35	79.4	1	1	2	0
Thiamine	Pure water	Pure methanol	35% B isocratic elution	0.708889	0.85	0	0	-0.65	-1.58	-9.14	-0.97	0	-3.32	22.92	0	2	6	4	19	269	1.11e+34	-727954	-65.42	1.49	291.55	320.17	2.51	-0.99	0	200	-71.2	335	-70.9	6.56	7.95	14.5	36.27	1.75	-2.99	10.15	104	2	2	4	1
Nicotinicacid	Pure water	Pure methanol	35% B isocratic elution	0.189122	0.03	0.04	3.56	-0.25	-1.01	-4.33	-0.01	0	-2.47	22.92	0.4	1	3	1	9	114	11100000000000	-274248	-12.08	0.77	149.15	142	2.15	0	0.88	92.9	1.16	177	-39.1	3.37	4.37	3.73	20.67	-2.73	-2.8	3.67	50.2	1	1	1	0
Alanine	Pure water	Pure methanol	35% B isocratic elution	-0.23669	-0.18	-0.11	3.79	0.84	-1.18	-3.51	1.14	0	-3.06	22.92	-3	2	3	1	6	61.8	1110000000000	-203245	-12.07	0.88	123.86	112.49	2.05	0	1.93	103	20.6	223	81.1	5.25	4.15	6.92	15.51	-0.69	-4.07	2.88	63.3	0	0	1	0
Leucine	Pure water	Pure methanol	35% B isocratic elution	0.180728	0.46	0.1	3.98	0.87	-1.04	-5.27	1.14	0	-2.81	22.92	-1.5	2	3	3	9	101	1.11e+21	-277279	-11.49	0.91	176.64	178.51	2.25	0	1.75	97.3	10	188	15.9	4.1	4.03	4.32	23.12	-1.46	-4.42	4.6	63.3	0	0	1	0
Isoleucine	Pure water	Pure methanol	35% B isocratic elution	0.300219	0.4	0.1	3.99	0.85	-1	-5.22	1.14	0	-2.77	22.92	-1.7	2	3	3	9	103	1.11e+21	-277278	-11.39	0.9	174.76	177.8	2.25	0	1.86	95.2	4.07	178	-13.2	3.66	4.06	5.29	24.73	-0.48	-4.81	8.21	63.3	0	0	1	0
Valine	Pure water	Pure methanol	35% B isocratic elution	0.438049	0.25	-0.17	3.48	1.29	-0.7	-4.64	1.14	0	-3.11	22.92	-2.3	2	3	2	8	90.4	1.11e+18	-252603	-16.64	0.58	154.87	154.22	2.19	0	7.95	86.9	30.2	126	74.6	3.87	1.16	5.48	13.49	-1.89	-5.23	8.12	63.3	0	0	1	0
Proline	Pure water	Pure methanol	35% B isocratic elution	0.119793	0.31	-0.11	3.62	-0.08	-1.08	-4.33	0.18	0	-2.64	22.92	-2.5	2	3	1	8	103	1.11e+16	-251835	-13.13	0.77	147.6	142.26	2.15	0	3.61	94.9	18	192	36.7	4.47	4	3.51	21.36	-3.35	-4.13	3.48	49.3	1	1	1	0
Phenylalanine	Pure water	Pure methanol	35% B isocratic elution	0.344305	0.22	-0.36	2.97	-0.17	-1.11	-6	-0.01	0	-2.62	22.92	-1.5	2	3	3	12	153	1.11e+22	-348280	-15.74	1.01	200.74	208.03	2.32	0	2.66	122	9.49	216	30.8	4.48	4.38	4.16	22.91	-1.94	-2.63	7.78	63.3	0	1	1	0
Methionine	Pure water	Pure methanol	35% B isocratic elution	-0.246319	0.05	-0.34	3.26	0.72	-1.18	-5.74	1.14	0	-3.02	22.92	-1.9	2	4	4	9	97	1.11e+19	-502501	-15.83	1.08	186.45	185.96	2.27	0.01	4.25	126	19.1	229	42.1	4.86	4.41	4.94	22.93	-1.51	-3.09	4.05	88.6	0	0	1	1
Tryptophan	Pure water	Pure methanol	35% B isocratic elution	-0.103169	-0.16	-0.9	1.74	-0.89	-1.3	-7.01	-0.59	0	-2.55	22.92	-1.1	3	3	3	15	245	1.11e+26	-430876	-21.02	1.24	233.33	250.05	2.4	0	5.34	153	-10.6	271	-20.2	4.73	6.7	4.11	22.25	-1.98	-4.08	5.74	79.1	1	2	2	0
Serine	Pure water	Pure methanol	35% B isocratic elution	-0.255685	-0.7	-0.29	2.82	0.79	-1.22	-3.67	1.14	0	-3.14	22.92	-3.1	3	4	2	7	72.6	11100000000000	-250467	-14.94	1.06	132.32	122.02	2.09	0	3.06	118	4.07	216	-33.2	4.49	4.85	3.58	19.55	-4.08	-3.26	0.99	83.6	0	0	1	0
Glutamine	Pure water	Pure methanol	35% B isocratic elution	-0.57135	-0.66	-0.91	1.53	0.5	-1.88	-5.15	1.14	0	-3.65	22.92	-3.1	3	4	4	10	146	1.11e+19	-333835	-24.89	1.35	180.5	176.05	2.25	0	6.95	174	25	351	64	9.61	7.18	5.6	22.19	-3.61	-5.52	7.53	106	0	0	2	0
Threonine	Pure water	Pure methanol	35% B isocratic elution	-0.202805	-0.48	-0.25	3.49	0.71	-1.26	-4.22	1.14	0	-2.99	22.92	-2.9	3	4	2	8	93.3	1.11e+16	-275147	-14.56	1.14	149.43	144.38	2.16	0.01	4	119	6.4	228	-10.9	5.24	4.98	2.45	17.53	-4.59	-5.42	3.68	83.6	0	0	1	0
Cysteine	Pure water	Pure methanol	35% B isocratic elution	-0.577763	-0.99	-0.24	3.62	0.58	-0.94	-4.57	1.14	0	-2.83	22.92	-2.5	3	4	2	7	75.3	11100000000000	-453148	-13.45	1	147.18	141.36	2.15	0.01	3.06	108	-15.6	173	-97.6	1.79	4.69	5.27	20.11	-1.25	-3.34	5	64.3	0	0	1	1
Asparagine	Pure water	Pure methanol	35% B isocratic elution	-0.686013	-0.94	-0.79	2.07	0.56	-1.91	-4.49	1.14	0	-3.81	22.92	-3.4	3	4	3	9	134	1.11e+16	-309157	-24.85	1.33	160.84	155.26	2.19	0	3.88	177	14.7	352	34.5	9.05	7.57	3.77	19.29	-6.05	-4.96	6.4	106	0	0	2	0
Glutamicacid	Pure water	Pure methanol	35% B isocratic elution	-0.622802	-1.03	-0.75	2.12	0.97	-1.44	-4.82	1.14	0	-3.7	22.92	-3.7	3	5	4	10	145	1.11e+18	-346311	-25.1	1.06	172.73	167.41	2.22	0	8.05	150	9.3	247	-26.7	4.8	5.32	4.16	20.54	-4.48	-4.16	4.84	101	0	0	1	1
Lysine	Pure water	Pure methanol	35% B isocratic elution	0.0160211	0.24	-0.71	2.83	1.15	-1.2	-5.71	1.14	0	-3.43	22.92	-3	3	4	5	10	106	1.11e+23	-312026	-21.17	0.86	191.1	191.01	2.28	0	5.99	127	75.3	255	325	8.64	1.15	8.95	18.74	-1	-1.73	0.96	89.3	0	0	2	0
Arginine	Pure water	Pure methanol	35% B isocratic elution	0.0389014	0.81	-1.26	1.47	0.72	-1.65	-6.36	1.14	0	-3.69	22.92	-4.2	4	4	5	12	176	1.11e+25	-380778	-28.48	1.38	214.93	214.24	2.33	0	9.11	182	56.4	339	241	10.62	3.9	10.66	22.26	-2.7	-2.93	1.97	128	0	0	4	0
Histidine	Pure water	Pure methanol	35% B isocratic elution	0.319349	0.52	-0.97	1.3	0.07	-1.46	-5.27	0.18	0	-3.51	22.92	-3.2	3	4	3	11	151	1.11e+19	-344509	-27.47	0.98	180.91	181.77	2.26	0	5.04	160	36.7	296	139	8.38	4.38	5.7	14.6	-3.9	-4.52	8.26	92	1	1	3	0
Citrulline	Pure water	Pure methanol	35% B isocratic elution	-0.0576016	-0.78	-1.3	1.3	0.38	-2.27	-6.2	1.14	0	-3.9	22.92	-4.3	4	4	5	12	171	1.11e+24	-393268	-29.64	1.53	214.73	215.15	2.33	0	7.6	204	40.5	433	151	12.42	8.36	5.05	24.14	-4.38	-3.03	2.31	118	0	0	3	0
Taurine	Pure water	Pure methanol	35% B isocratic elution	-1.06345	-1.39	-0.56	3.08	0.82	-1.43	-3.93	1.14	0	-3.45	22.92	-4.1	2	4	2	7	120	11100000000000	-476406	-18.56	1.09	143.51	133.49	2.13	0.01	3.57	138	-7.89	285	-71.8	4.16	6.16	-2.47	10.55	-10.36	-3.86	3.47	88.8	0	0	1	1
Tyrosine	Pure water	Pure methanol	35% B isocratic elution	-0.00102856	0.58	-0.91	2.22	-0.56	-1.7	-6.11	-0.01	0	-2.9	22.92	-2.3	3	4	3	13	176	1.11e+23	-395507	-20.45	1.27	210.41	219.03	2.34	0	4.34	158	-11.2	301	-58.2	5.35	7.81	4.18	23.28	-2.58	-2.6	8.84	83.6	0	1	1	0
Hypotaurine	Pure water	Pure methanol	35% B isocratic elution	-0.554838	-1.16	-0.48	3.16	0.61	-1.46	-4.05	1.14	0	-3.39	22.92	-1.5	2	4	2	6	55.5	1110000000000	-429187	-19.14	0.95	136.46	125.99	2.1	0	5.56	129	43.8	272	164	8.05	3.84	8.34	19	-1.9	-2.55	5.19	82.5	0	0	1	1
L-Hydroxyproline	Pure water	Pure methanol	35% B isocratic elution	-0.177095	-0.48	-0.6	2.82	-0.35	-1.71	-4.41	0.18	0	-3.04	22.92	-3.3	3	4	1	9	125	1.11e+17	-299059	-18.75	1.12	155.95	154.27	2.19	0	3.05	140	34.4	301	118	8.1	5.75	7.9	18.5	-1.19	-2.19	3.72	69.6	1	1	1	0
N-omiga-acetylhistamine	Pure water	Pure methanol	35% B isocratic elution	0.875612	1.54	-1.01	2.28	-0.1	-1.57	-5.96	0.18	0	-3.33	22.92	-0.4	2	2	3	11	138	1.11e+21	-321960	-23.57	0.83	195.51	194.44	2.29	0	4.66	148	58.4	320	214	11.2	4.88	6.06	14.64	-2.8	-2.61	4.77	57.8	1	1	3	0
L-pyroglutamicacid	Pure water	Pure methanol	35% B isocratic elution	-0.5836	-0.96	-0.59	2.43	-0.14	-1.5	-4.27	0.18	0	-3.19	22.92	-0.8	2	3	1	9	154	1110000000000000	-298326	-20.95	0.96	151.34	146.44	2.17	0	7.17	137	11.3	267	-26.3	6.36	6.48	3.66	21.17	-4.87	-2.3	6.22	66.4	1	1	1	0
Tyramine	Pure water	Pure methanol	35% B isocratic elution	0.358389	0.73	-0.19	3.22	-0.29	-1.11	-5.62	-0.01	0	-2.58	22.92	1.1	2	2	2	10	87.3	1.11e+20	-277120	-13.98	0.82	183.62	181.83	2.26	0	2.6	106	27.2	227	168	5.88	3.52	8.82	18.57	0.95	-2.63	3.17	46.2	0	1	1	0
Histamine	Pure water	Pure methanol	35% B isocratic elution	0.426058	-0.14	-0.65	2.94	-0.08	-1.33	-4.73	0.18	0	-3.04	22.92	-0.7	2	2	2	8	64.7	1.11e+16	-226118	-18.32	0.8	155.19	146.49	2.17	0	4.89	122	68.6	307	360	10.5	2.98	8.7	18.47	-1.26	-2.85	4.92	54.7	1	1	3	0
AaC	Pure water	Pure methanol	35% B isocratic elution	0.878787	1.31	-0.33	2.2	-1.53	-0.63	-6.6	-1.36	0.01	-1.83	22.92	2.6	2	2	0	14	219	1.11e+22	-369670	-14.85	0.86	210.7	216.51	2.34	0	2.51	108	-19	154	-31.5	2.67	3.95	5.78	12.59	0.02	-2.83	2.59	54.7	2	3	3	0
IQx	Pure water	Pure methanol	35% B isocratic elution	0.977666	1.48	-0.91	0.96	-1.56	-1.3	-6.65	-1.36	0	-2.32	22.92	0.6	1	4	0	15	246	1.11e+23	-414479	-25.04	0.93	218.25	227.81	2.36	0.01	8.8	141	56.1	274	235	9.64	3.08	5.71	14.84	-2.23	-2.75	8.88	69.6	2	3	5	0
8-MeIQx	Pure water	Pure methanol	35% B isocratic elution	1.10775	1.31	-0.95	0.92	-1.58	-1.32	-7.28	-1.36	0	-2.26	22.92	1	1	4	0	16	271	1.11e+26	-439162	-25.13	0.98	237.6	249.06	2.4	0.01	7.72	142	63.8	281	265	10.06	2.97	5.88	15.22	-1.59	-1.95	7.78	69.6	2	3	5	0
MeIQ	Pure water	Pure methanol	35% B isocratic elution	1.17615	1.31	-0.62	1.35	-1.6	-0.97	-7.37	-1.36	0.01	-1.92	22.92	2	1	3	0	16	270	1.11e+27	-429091	-21.18	0.93	236.91	253.92	2.4	0	9.17	124	38.5	216	166	7.22	2.74	7.22	16.13	0.27	-4.33	9.28	56.7	2	3	4	0
IQ[4,5-b]	Pure water	Pure methanol	35% B isocratic elution	0.943044	1.2	-0.96	0.7	-1.61	-1.26	-6.9	-1.36	0	-2.36	22.92	1.7	1	3	0	15	245	1.11e+24	-404413	-27.45	0.9	223.43	232.81	2.37	0	10.84	139	39.2	269	182	8.87	4.02	6.83	16.69	-0.82	-4.58	11	56.7	2	3	4	0
Harman	Pure water	Pure methanol	35% B isocratic elution	1.31628	1.47	0.16	2.69	-1.42	-0.54	-6.79	-1.36	0.01	-1.69	22.92	3.6	1	1	0	14	216	1.11e+23	-359587	-12.73	0.59	214.44	223.28	2.35	0	4.55	81.6	10	132	63.3	3.7	2.33	7.72	16.34	1.94	-4.95	4.58	28.7	2	3	2	0
IQ	Pure water	Pure methanol	35% B isocratic elution	1.08913	1.47	-0.59	1.43	-1.61	-0.95	-6.89	-1.36	0	-1.98	22.92	1.5	1	3	0	15	245	1.11e+24	-404413	-20.86	0.92	222.22	233.02	2.37	0	8.83	123	32.7	213	148	6.9	2.78	7	15.75	-0.15	-2.69	8.95	56.7	2	3	4	0
Norharman	Pure water	Pure methanol	35% B isocratic elution	1.13946	1.45	-0.02	2.73	-1.43	-0.61	-6.2	-1.36	0.01	-1.83	22.92	3.2	1	1	0	13	193	1.11e+20	-334905	-13.23	0.56	196.55	201.82	2.3	0	4.61	85.1	3.38	142	46.2	3.74	2.88	7.61	16.32	1.37	-4.84	4.64	28.7	2	3	2	0
DMIP	Pure water	Pure methanol	35% B isocratic elution	1.21868	1.58	-0.86	1.51	-0.78	-1.32	-5.98	-0.59	0	-2.72	22.92	1	1	3	0	12	172	1.11e+21	-332645	-25.27	0.81	195.56	198.01	2.3	0.01	9.99	128	57.4	269	243	9.75	3.19	7.16	17.5	-1.15	-4.24	10.15	56.7	2	2	4	0
Phe-p-1	Pure water	Pure methanol	35% B isocratic elution	1.33542	1.53	0.07	2.74	-1.21	-0.53	-6.6	-1.16	0.01	-1.81	22.92	2.3	1	2	1	13	152	1.11e+22	-335660	-12.87	0.73	209.56	213.73	2.33	0	3.22	91.3	4.88	123	51	3.16	1.78	7	14.9	1.32	-6	3.7	38.9	1	2	2	0
7,8-DiMeIQx	Pure water	Pure methanol	35% B isocratic elution	1.01763	1.35	-0.97	0.84	-1.6	-1.34	-7.84	-1.36	0	-2.19	22.92	1.4	1	4	0	17	297	1.11e+29	-463843	-25.35	1.03	254.55	269.67	2.43	0.01	6.62	143	68.9	284	281	10.44	2.87	6.01	15.48	-1.09	-4.51	6.74	69.6	2	3	5	0
Sarcosine	Pure water	Pure methanol	35% B isocratic elution	-0.325343	-0.19	-0.03	4.28	0.89	-1.11	-3.67	1.14	0	-3.05	22.92	-2.8	2	3	2	6	52.8	1110000000000	-203238	-12.38	0.78	127.98	113.01	2.05	0	2.92	94.2	17.5	201	42.4	4.57	4.19	4.37	24.65	-2.74	-4.93	8.22	49.3	0	0	1	0
Creatinine	Pure water	Pure methanol	35% B isocratic elution	0.656529	1.1	-0.87	1.29	-0.16	-1.68	-4.28	0.18	0	-3.54	22.92	-1.8	1	1	0	8	151	111000000000000	-248681	-30.05	0.8	143.83	134.46	2.13	0	11.98	146	74.4	333	274	12.86	4.35	5.11	15.98	-5.3	-5.49	12.08	58.7	1	1	3	0
L-Carnosine	Pure water	Pure methanol	35% B isocratic elution	0.157204	0.28	-1.78	-0.26	-0.57	-2.58	-7.41	0.18	0	-3.78	22.92	-4	4	5	6	16	259	1.11e+29	-499765	-38.44	1.62	256.29	270.05	2.43	0	12.99	233	51	527	223	14.27	9.82	9.18	20.43	-2.61	-2.2	9.07	121	1	1	4	0
Betaine	Pure water	Pure methanol	35% B isocratic elution	0.760011	0.65	-1.92	-0.47	0.83	-2.32	-4.61	1.14	0	-4.61	22.92	0.5	0	2	1	8	87.6	1.11e+18	-252565	-41.59	0.81	153.39	154.86	2.19	0	15.35	178	181	468	789	21.46	0.08	1.63	14.25	-9.97	-2.66	15.47	40.1	0	0	1	0
Cytosine	Pure water	Pure methanol	35% B isocratic elution	0.591837	1.06	-0.54	0.33	-0.84	-2.03	-4.06	-0.01	0	-3.6	22.92	-1.7	2	2	0	8	170	1110000000000	-247927	-34.38	0.87	136.73	126.12	2.1	0	12.89	167	25.9	432	122	12.95	9.67	6.77	18.33	-4	-2.61	13.02	67.5	1	1	3	0
Hypoxanthine	Pure water	Pure methanol	35% B isocratic elution	-0.0124725	-0.04	-0.62	1.31	-1.07	-1.64	-4.37	-0.59	0	-3.14	22.92	-0.5	2	3	0	10	190	11100000000000	-305849	-25.27	0.97	150.2	143.93	2.16	0.01	2.51	159	5.76	351	-26.8	8.83	8.14	3.33	11.33	-6.92	-2.86	2.6	70.1	2	2	4	0
Xanthine	Pure water	Pure methanol	35% B isocratic elution	-0.509304	-0.71	-0.68	1.37	-1.15	-1.62	-4.62	-0.59	0	-2.99	22.92	-0.7	3	3	0	11	217	111000000000000	-353097	-23.72	1.25	159.89	153.96	2.19	0.01	6.06	170	-15.1	367	-128	7.64	10.2	7.74	22.93	-2.99	-2.73	6.1	86.9	2	2	4	0
Guanine	Pure water	Pure methanol	35% B isocratic elution	0.112564	0.23	-0.86	0.35	-1.41	-2.04	-4.78	-0.59	0	-3.31	22.92	-1.1	3	3	0	11	225	1110000000000000	-340610	-30.43	1.22	164.42	158.81	2.2	0.01	3.28	191	-7.34	441	-50.1	10.78	11.63	4.81	13.86	-5.99	-2.81	3.34	96.2	2	2	5	0
Adenine	Pure water	Pure methanol	35% B isocratic elution	1.01727	1.45	-0.85	0.65	-1.27	-1.75	-4.54	-0.59	0	-3.06	22.92	-0.1	2	4	0	10	127	111000000000000	-293365	-30.51	0.99	153.88	148.09	2.17	0	11.17	161	9.31	380	47.5	10.2	8.73	5.5	15	-4.52	-2.45	11.33	80.5	2	2	5	0
Beta-Thymidine	Pure water	Pure methanol	35% B isocratic elution	-1.19813	-1.13	-1.19	1.16	-1.37	-1.69	-7.22	-0.97	0	-2.62	22.92	-1.2	3	5	2	17	381	1.11e+30	-549390	-24.52	1.42	246.36	266.66	2.43	0.01	4.01	176	50.1	310	96.6	9.28	5.39	15.53	45.1	-0.93	-3.96	6.43	99.1	1	2	2	0
Cytidine	Pure water	Pure methanol	35% B isocratic elution	-0.473754	-0.35	-1.69	-2.05	-2.02	-2.54	-6.93	-0.97	0	-3.04	22.92	-2.1	4	5	2	17	383	1.11e+29	-559442	-33.42	1.74	241.37	261.47	2.42	0.01	6.86	228	40.6	467	146	13.35	9.24	15.82	45.67	-2.4	-3.46	9.4	129	1	2	3	0
Inosine	Pure water	Pure methanol	35% B isocratic elution	-1.27721	-1.51	-1.89	-1.34	-2.48	-2.6	-7.41	-1.55	0	-2.92	22.92	-1.3	4	7	2	19	405	1.11e+30	-617361	-37.38	1.8	261.27	285.84	2.46	0.01	9.42	243	21.5	459	3.18	11.36	10.23	10.31	29.87	-2.75	-2.08	9.18	129	2	3	4	0
Xanthosine	Pure water	Pure methanol	35% B isocratic elution	-1.15087	-0.91	-1.84	-1.92	-2.32	-2.54	-7.47	-1.55	0	-2.84	22.92	-2.4	5	7	2	20	434	1.11e+31	-664603	-37.75	1.91	265.99	291.82	2.47	0.01	15.45	240	28.5	439	14	11	9.33	12.24	32.43	-2.45	-3.34	12.18	146	2	3	4	0
Guanosine	Pure water	Pure methanol	35% B isocratic elution	-0.879792	-1.06	-2.17	-2.39	-2.83	-2.87	-7.85	-1.55	0	-2.98	22.92	-1.9	5	7	2	20	446	1.11e+32	-652123	-42.64	2.09	276.17	298.73	2.48	0.01	11.43	271	-5.63	543	-85.9	12.26	14.35	13.14	36.02	-2.86	-2.22	11.13	155	2	3	5	0
Uridine	Pure water	Pure methanol	35% B isocratic elution	-1.37981	-0.58	-1.27	-0.25	-1.36	-1.72	-6.7	-0.97	0	-2.67	22.92	-2	4	6	2	17	371	1.11e+28	-571934	-25.98	1.71	235.87	256.94	2.41	0.01	5.57	194	28.6	328	37.3	8.29	6.3	11.64	34.25	-0.98	-1.56	4.28	119	1	2	2	0
Adenosine	Pure water	Pure methanol	35% B isocratic elution	-0.250369	0.44	-1.3	0.66	-2.08	-1.62	-7.39	-1.55	0	-2.06	22.92	-1.1	4	8	2	19	335	1.11e+31	-604889	-23.66	1.73	253.58	283.19	2.45	0.01	2.18	191	36.3	322	107	8.99	5.54	14.19	39.95	-0.74	-3.53	3.84	140	2	3	5	0
D-Pantothenic acid	Pure water	Pure methanol	50% B isocratic elution	-1.05133	-1.1	-1.45	1.6	-0.1	-2.01	-7.34	1.14	0	-3.32	25.03	-1.1	4	5	6	15	239	1.11e+31	-492236	-26.02	1.56	247.96	269.32	2.43	0	7.46	186	7.26	354	-39.4	8.13	8.95	6.22	23.15	-1.05	-7.18	4.69	107	0	0	1	0
niacinamide	Pure water	Pure methanol	50% B isocratic elution	0.763233	0.64	-0.44	3.02	-0.38	-0.95	-4.69	-0.01	0	-2.77	25.03	-0.4	1	2	1	9	114	111000000000000	-261773	-16.8	0.79	152.74	146.35	2.17	0	2.95	112	27.7	215	95.8	7.01	3.68	5.08	12.91	-3.24	-5.1	4.94	56	1	1	2	0
Pyridoxal	Pure water	Pure methanol	50% B isocratic elution	0.519803	1.05	-0.54	2.47	-0.74	-1.21	-5.64	-0.01	0	-2.48	25.03	0	2	4	2	12	162	1.11e+20	-370806	-16.87	1.08	190.02	193.09	2.29	0.01	3.53	121	8.31	226	-19.7	4.94	5.51	5.04	18.08	-1.4	-2.71	3.58	70.4	1	1	1	0
Pyridoxine	Pure water	Pure methanol	50% B isocratic elution	1.00555	1.6	-0.86	1.77	-0.95	-1.46	-5.8	-0.01	0	-2.69	25.03	-0.8	3	4	2	12	142	1.11e+22	-371565	-22.39	1.06	195.11	198.18	2.3	0	9.44	137	11.5	264	32	6.46	6.06	11.25	32	0.01	-3.22	2.9	73.6	1	1	1	0
Pyridoxamine	Pure water	Pure methanol	50% B isocratic elution	0.995598	1.4	-0.79	2.14	-0.9	-1.53	-5.97	-0.01	0	-2.64	25.03	-1	3	4	2	12	143	1.11e+23	-359090	-19.85	1.23	199.15	205.79	2.31	0.01	2.37	144	49.5	321	233	9.73	4.96	8.51	18.04	-0.23	-3.37	4.35	79.4	1	1	2	0
Thiamine	Pure water	Pure methanol	50% B isocratic elution	0.772838	1.06	0	0	-0.92	-1.45	-9.26	-0.97	0	-3.26	25.03	0	2	6	4	19	269	1.11e+34	-727954	-65.42	1.49	291.55	320.17	2.51	-0.99	0	200	-71.2	335	-70.9	6.56	7.95	14.5	36.27	1.75	-2.99	10.15	104	2	2	4	1
Nicotinicacid	Pure water	Pure methanol	50% B isocratic elution	0.190462	-0.04	-0.13	3.56	-0.49	-0.93	-4.41	-0.01	0	-2.42	25.03	0.4	1	3	1	9	114	11100000000000	-274248	-12.08	0.77	149.15	142	2.15	0	0.88	92.9	1.16	177	-39.1	3.37	4.37	3.73	20.67	-2.73	-2.8	3.67	50.2	1	1	1	0
Alanine	Pure water	Pure methanol	50% B isocratic elution	-0.254467	-0.23	-0.21	3.79	0.72	-1.09	-3.57	1.14	0	-3.05	25.03	-3	2	3	1	6	61.8	1110000000000	-203245	-12.07	0.88	123.86	112.49	2.05	0	1.93	103	20.6	223	81.1	5.25	4.15	6.92	15.51	-0.69	-4.07	2.88	63.3	0	0	1	0
Leucine	Pure water	Pure methanol	50% B isocratic elution	0.210475	0.34	-0.15	3.98	0.54	-0.95	-5.35	1.14	0	-2.73	25.03	-1.5	2	3	3	9	101	1.11e+21	-277279	-11.49	0.91	176.64	178.51	2.25	0	1.75	97.3	10	188	15.9	4.1	4.03	4.32	23.12	-1.46	-4.42	4.6	63.3	0	0	1	0
Isoleucine	Pure water	Pure methanol	50% B isocratic elution	0.333178	0.39	-0.15	3.99	0.52	-0.92	-5.29	1.14	0	-2.69	25.03	-1.7	2	3	3	9	103	1.11e+21	-277278	-11.39	0.9	174.76	177.8	2.25	0	1.86	95.2	4.07	178	-13.2	3.66	4.06	5.29	24.73	-0.48	-4.81	8.21	63.3	0	0	1	0
Valine	Pure water	Pure methanol	50% B isocratic elution	0.43739	0.23	-0.3	3.48	1.11	-0.62	-4.7	1.14	0	-3.08	25.03	-2.3	2	3	2	8	90.4	1.11e+18	-252603	-16.64	0.58	154.87	154.22	2.19	0	7.95	86.9	30.2	126	74.6	3.87	1.16	5.48	13.49	-1.89	-5.23	8.12	63.3	0	0	1	0
Proline	Pure water	Pure methanol	50% B isocratic elution	0.125265	0.35	-0.25	3.62	-0.27	-0.99	-4.39	0.18	0	-2.61	25.03	-2.5	2	3	1	8	103	1.11e+16	-251835	-13.13	0.77	147.6	142.26	2.15	0	3.61	94.9	18	192	36.7	4.47	4	3.51	21.36	-3.35	-4.13	3.48	49.3	1	1	1	0
Phenylalanine	Pure water	Pure methanol	50% B isocratic elution	0.349821	0.24	-0.56	2.97	-0.48	-1.03	-6.1	-0.01	0	-2.56	25.03	-1.5	2	3	3	12	153	1.11e+22	-348280	-15.74	1.01	200.74	208.03	2.32	0	2.66	122	9.49	216	30.8	4.48	4.38	4.16	22.91	-1.94	-2.63	7.78	63.3	0	1	1	0
Methionine	Pure water	Pure methanol	50% B isocratic elution	-0.236878	-0.07	-0.51	3.26	0.45	-1.09	-5.83	1.14	0	-2.97	25.03	-1.9	2	4	4	9	97	1.11e+19	-502501	-15.83	1.08	186.45	185.96	2.27	0.01	4.25	126	19.1	229	42.1	4.86	4.41	4.94	22.93	-1.51	-3.09	4.05	88.6	0	0	1	1
Tryptophan	Pure water	Pure methanol	50% B isocratic elution	-0.0798393	-0.17	-1.07	1.74	-1.22	-1.21	-7.11	-0.59	0	-2.5	25.03	-1.1	3	3	3	15	245	1.11e+26	-430876	-21.02	1.24	233.33	250.05	2.4	0	5.34	153	-10.6	271	-20.2	4.73	6.7	4.11	22.25	-1.98	-4.08	5.74	79.1	1	2	2	0
Serine	Pure water	Pure methanol	50% B isocratic elution	-0.276262	-0.74	-0.36	2.82	0.69	-1.13	-3.73	1.14	0	-3.14	25.03	-3.1	3	4	2	7	72.6	11100000000000	-250467	-14.94	1.06	132.32	122.02	2.09	0	3.06	118	4.07	216	-33.2	4.49	4.85	3.58	19.55	-4.08	-3.26	0.99	83.6	0	0	1	0
Glutamine	Pure water	Pure methanol	50% B isocratic elution	-0.58667	-0.68	-0.86	1.53	0.48	-1.72	-5.23	1.14	0	-3.7	25.03	-3.1	3	4	4	10	146	1.11e+19	-333835	-24.89	1.35	180.5	176.05	2.25	0	6.95	174	25	351	64	9.61	7.18	5.6	22.19	-3.61	-5.52	7.53	106	0	0	2	0
Threonine	Pure water	Pure methanol	50% B isocratic elution	-0.209888	-0.48	-0.38	3.49	0.53	-1.16	-4.3	1.14	0	-2.96	25.03	-2.9	3	4	2	8	93.3	1.11e+16	-275147	-14.56	1.14	149.43	144.38	2.16	0.01	4	119	6.4	228	-10.9	5.24	4.98	2.45	17.53	-4.59	-5.42	3.68	83.6	0	0	1	0
Cysteine	Pure water	Pure methanol	50% B isocratic elution	-0.588522	-1.01	-0.38	3.62	0.37	-0.87	-4.65	1.14	0	-2.79	25.03	-2.5	3	4	2	7	75.3	11100000000000	-453148	-13.45	1	147.18	141.36	2.15	0.01	3.06	108	-15.6	173	-97.6	1.79	4.69	5.27	20.11	-1.25	-3.34	5	64.3	0	0	1	1
Asparagine	Pure water	Pure methanol	50% B isocratic elution	-0.718642	-0.98	-0.67	2.07	0.63	-1.75	-4.56	1.14	0	-3.89	25.03	-3.4	3	4	3	9	134	1.11e+16	-309157	-24.85	1.33	160.84	155.26	2.19	0	3.88	177	14.7	352	34.5	9.05	7.57	3.77	19.29	-6.05	-4.96	6.4	106	0	0	2	0
Glutamicacid	Pure water	Pure methanol	50% B isocratic elution	-0.652673	-1.19	-0.73	2.12	0.93	-1.32	-4.9	1.14	0	-3.73	25.03	-3.7	3	5	4	10	145	1.11e+18	-346311	-25.1	1.06	172.73	167.41	2.22	0	8.05	150	9.3	247	-26.7	4.8	5.32	4.16	20.54	-4.48	-4.16	4.84	101	0	0	1	1
Lysine	Pure water	Pure methanol	50% B isocratic elution	0.0134489	0.3	-0.79	2.83	1	-1.09	-5.78	1.14	0	-3.43	25.03	-3	3	4	5	10	106	1.11e+23	-312026	-21.17	0.86	191.1	191.01	2.28	0	5.99	127	75.3	255	325	8.64	1.15	8.95	18.74	-1	-1.73	0.96	89.3	0	0	2	0
Arginine	Pure water	Pure methanol	50% B isocratic elution	0.0469834	0.85	-1.22	1.47	0.68	-1.48	-6.43	1.14	0	-3.73	25.03	-4.2	4	4	5	12	176	1.11e+25	-380778	-28.48	1.38	214.93	214.24	2.33	0	9.11	182	56.4	339	241	10.62	3.9	10.66	22.26	-2.7	-2.93	1.97	128	0	0	4	0
Histidine	Pure water	Pure methanol	50% B isocratic elution	0.296716	0.54	-0.87	1.3	0.08	-1.32	-5.34	0.18	0	-3.58	25.03	-3.2	3	4	3	11	151	1.11e+19	-344509	-27.47	0.98	180.91	181.77	2.26	0	5.04	160	36.7	296	139	8.38	4.38	5.7	14.6	-3.9	-4.52	8.26	92	1	1	3	0
Citrulline	Pure water	Pure methanol	50% B isocratic elution	-0.0585352	-0.83	-1.23	1.3	0.37	-2.08	-6.28	1.14	0	-3.96	25.03	-4.3	4	4	5	12	171	1.11e+24	-393268	-29.64	1.53	214.73	215.15	2.33	0	7.6	204	40.5	433	151	12.42	8.36	5.05	24.14	-4.38	-3.03	2.31	118	0	0	3	0
Taurine	Pure water	Pure methanol	50% B isocratic elution	-1.10317	-1.17	-0.56	3.08	0.76	-1.33	-4.01	1.14	0	-3.48	25.03	-4.1	2	4	2	7	120	11100000000000	-476406	-18.56	1.09	143.51	133.49	2.13	0.01	3.57	138	-7.89	285	-71.8	4.16	6.16	-2.47	10.55	-10.36	-3.86	3.47	88.8	0	0	1	1
Tyrosine	Pure water	Pure methanol	50% B isocratic elution	-0.00284268	0.77	-1.02	2.22	-0.79	-1.58	-6.22	-0.01	0	-2.88	25.03	-2.3	3	4	3	13	176	1.11e+23	-395507	-20.45	1.27	210.41	219.03	2.34	0	4.34	158	-11.2	301	-58.2	5.35	7.81	4.18	23.28	-2.58	-2.6	8.84	83.6	0	1	1	0
Hypotaurine	Pure water	Pure methanol	50% B isocratic elution	-0.585319	-1	-0.46	3.16	0.62	-1.33	-4.11	1.14	0	-3.43	25.03	-1.5	2	4	2	6	55.5	1110000000000	-429187	-19.14	0.95	136.46	125.99	2.1	0	5.56	129	43.8	272	164	8.05	3.84	8.34	19	-1.9	-2.55	5.19	82.5	0	0	1	1
L-Hydroxyproline	Pure water	Pure methanol	50% B isocratic elution	-0.193111	-0.42	-0.61	2.82	-0.41	-1.57	-4.49	0.18	0	-3.06	25.03	-3.3	3	4	1	9	125	1.11e+17	-299059	-18.75	1.12	155.95	154.27	2.19	0	3.05	140	34.4	301	118	8.1	5.75	7.9	18.5	-1.19	-2.19	3.72	69.6	1	1	1	0
N-omiga-acetylhistamine	Pure water	Pure methanol	50% B isocratic elution	0.880621	1.68	-0.99	2.28	-0.18	-1.43	-6.03	0.18	0	-3.36	25.03	-0.4	2	2	3	11	138	1.11e+21	-321960	-23.57	0.83	195.51	194.44	2.29	0	4.66	148	58.4	320	214	11.2	4.88	6.06	14.64	-2.8	-2.61	4.77	57.8	1	1	3	0
L-pyroglutamicacid	Pure water	Pure methanol	50% B isocratic elution	-0.622003	-0.91	-0.57	2.43	-0.17	-1.38	-4.35	0.18	0	-3.23	25.03	-0.8	2	3	1	9	154	1110000000000000	-298326	-20.95	0.96	151.34	146.44	2.17	0	7.17	137	11.3	267	-26.3	6.36	6.48	3.66	21.17	-4.87	-2.3	6.22	66.4	1	1	1	0
Tyramine	Pure water	Pure methanol	50% B isocratic elution	0.377613	0.94	-0.39	3.22	-0.59	-1.03	-5.7	-0.01	0	-2.52	25.03	1.1	2	2	2	10	87.3	1.11e+20	-277120	-13.98	0.82	183.62	181.83	2.26	0	2.6	106	27.2	227	168	5.88	3.52	8.82	18.57	0.95	-2.63	3.17	46.2	0	1	1	0
Histamine	Pure water	Pure methanol	50% B isocratic elution	0.424052	0.05	-0.67	2.94	-0.16	-1.22	-4.78	0.18	0	-3.06	25.03	-0.7	2	2	2	8	64.7	1.11e+16	-226118	-18.32	0.8	155.19	146.49	2.17	0	4.89	122	68.6	307	360	10.5	2.98	8.7	18.47	-1.26	-2.85	4.92	54.7	1	1	3	0
AaC	Pure water	Pure methanol	50% B isocratic elution	0.912383	1.35	-0.56	2.2	-1.91	-0.57	-6.68	-1.36	0.01	-1.76	25.03	2.6	2	2	0	14	219	1.11e+22	-369670	-14.85	0.86	210.7	216.51	2.34	0	2.51	108	-19	154	-31.5	2.67	3.95	5.78	12.59	0.02	-2.83	2.59	54.7	2	3	3	0
IQx	Pure water	Pure methanol	50% B isocratic elution	0.995069	1.67	-0.99	0.96	-1.78	-1.17	-6.74	-1.36	0	-2.32	25.03	0.6	1	4	0	15	246	1.11e+23	-414479	-25.04	0.93	218.25	227.81	2.36	0.01	8.8	141	56.1	274	235	9.64	3.08	5.71	14.84	-2.23	-2.75	8.88	69.6	2	3	5	0
8-MeIQx	Pure water	Pure methanol	50% B isocratic elution	1.12719	1.59	-1.08	0.92	-1.86	-1.2	-7.38	-1.36	0	-2.24	25.03	1	1	4	0	16	271	1.11e+26	-439162	-25.13	0.98	237.6	249.06	2.4	0.01	7.72	142	63.8	281	265	10.06	2.97	5.88	15.22	-1.59	-1.95	7.78	69.6	2	3	5	0
MeIQ	Pure water	Pure methanol	50% B isocratic elution	1.22092	1.61	-0.83	1.35	-1.97	-0.87	-7.46	-1.36	0.01	-1.86	25.03	2	1	3	0	16	270	1.11e+27	-429091	-21.18	0.93	236.91	253.92	2.4	0	9.17	124	38.5	216	166	7.22	2.74	7.22	16.13	0.27	-4.33	9.28	56.7	2	3	4	0
IQ[4,5-b]	Pure water	Pure methanol	50% B isocratic elution	0.964054	1.47	-1.05	0.7	-1.85	-1.14	-6.99	-1.36	0	-2.35	25.03	1.7	1	3	0	15	245	1.11e+24	-404413	-27.45	0.9	223.43	232.81	2.37	0	10.84	139	39.2	269	182	8.87	4.02	6.83	16.69	-0.82	-4.58	11	56.7	2	3	4	0
Harman	Pure water	Pure methanol	50% B isocratic elution	1.35948	1.64	-0.15	2.69	-1.88	-0.49	-6.88	-1.36	0.01	-1.58	25.03	3.6	1	1	0	14	216	1.11e+23	-359587	-12.73	0.59	214.44	223.28	2.35	0	4.55	81.6	10	132	63.3	3.7	2.33	7.72	16.34	1.94	-4.95	4.58	28.7	2	3	2	0
IQ	Pure water	Pure methanol	50% B isocratic elution	1.11979	1.64	-0.77	1.43	-1.93	-0.85	-6.98	-1.36	0	-1.93	25.03	1.5	1	3	0	15	245	1.11e+24	-404413	-20.86	0.92	222.22	233.02	2.37	0	8.83	123	32.7	213	148	6.9	2.78	7	15.75	-0.15	-2.69	8.95	56.7	2	3	4	0
Norharman	Pure water	Pure methanol	50% B isocratic elution	1.16496	1.6	-0.27	2.73	-1.82	-0.56	-6.28	-1.36	0.01	-1.76	25.03	3.2	1	1	0	13	193	1.11e+20	-334905	-13.23	0.56	196.55	201.82	2.3	0	4.61	85.1	3.38	142	46.2	3.74	2.88	7.61	16.32	1.37	-4.84	4.64	28.7	2	3	2	0
DMIP	Pure water	Pure methanol	50% B isocratic elution	1.22201	1.77	-0.92	1.51	-0.95	-1.2	-6.06	-0.59	0	-2.73	25.03	1	1	3	0	12	172	1.11e+21	-332645	-25.27	0.81	195.56	198.01	2.3	0.01	9.99	128	57.4	269	243	9.75	3.19	7.16	17.5	-1.15	-4.24	10.15	56.7	2	2	4	0
Phe-p-1	Pure water	Pure methanol	50% B isocratic elution	1.38315	1.66	-0.22	2.74	-1.64	-0.47	-6.68	-1.16	0.01	-1.71	25.03	2.3	1	2	1	13	152	1.11e+22	-335660	-12.87	0.73	209.56	213.73	2.33	0	3.22	91.3	4.88	123	51	3.16	1.78	7	14.9	1.32	-6	3.7	38.9	1	2	2	0
7,8-DiMeIQx	Pure water	Pure methanol	50% B isocratic elution	1.06585	1.6	-1.14	0.84	-1.95	-1.21	-7.94	-1.36	0	-2.15	25.03	1.4	1	4	0	17	297	1.11e+29	-463843	-25.35	1.03	254.55	269.67	2.43	0.01	6.62	143	68.9	284	281	10.44	2.87	6.01	15.48	-1.09	-4.51	6.74	69.6	2	3	5	0
Sarcosine	Pure water	Pure methanol	50% B isocratic elution	-0.345891	-0.23	-0.15	4.28	0.75	-1.02	-3.74	1.14	0	-3.03	25.03	-2.8	2	3	2	6	52.8	1110000000000	-203238	-12.38	0.78	127.98	113.01	2.05	0	2.92	94.2	17.5	201	42.4	4.57	4.19	4.37	24.65	-2.74	-4.93	8.22	49.3	0	0	1	0
Creatinine	Pure water	Pure methanol	50% B isocratic elution	0.61478	1.15	-0.7	1.29	-0.03	-1.53	-4.33	0.18	0	-3.65	25.03	-1.8	1	1	0	8	151	111000000000000	-248681	-30.05	0.8	143.83	134.46	2.13	0	11.98	146	74.4	333	274	12.86	4.35	5.11	15.98	-5.3	-5.49	12.08	58.7	1	1	3	0
L-dihydrooroticacid	Pure water	Pure methanol	50% B isocratic elution	-1.72867	-1.1	-0.73	1.72	-0.45	-1.6	-4.65	-0.01	0	-3.31	25.03	-1.5	3	4	1	11	225	1.11e+16	-379565	-23.86	1.38	167.39	163.4	2.21	0.01	5.18	172	-17.2	327	-144	5.51	8.7	2.35	17.25	-6.68	-4.92	4.87	95.5	1	1	2	0
L-Carnosine	Pure water	Pure methanol	50% B isocratic elution	0.14306	0.34	-1.67	-0.26	-0.6	-2.37	-7.53	0.18	0	-3.86	25.03	-4	4	5	6	16	259	1.11e+29	-499765	-38.44	1.62	256.29	270.05	2.43	0	12.99	233	51	527	223	14.27	9.82	9.18	20.43	-2.61	-2.2	9.07	121	1	1	4	0
Betaine	Pure water	Pure methanol	50% B isocratic elution	0.704125	0.81	-1.58	-0.47	1.1	-2.13	-4.67	1.14	0	-4.78	25.03	0.5	0	2	1	8	87.6	1.11e+18	-252565	-41.59	0.81	153.39	154.86	2.19	0	15.35	178	181	468	789	21.46	0.08	1.63	14.25	-9.97	-2.66	15.47	40.1	0	0	1	0
Cytosine	Pure water	Pure methanol	50% B isocratic elution	0.553391	1.14	-0.3	0.33	-0.66	-1.87	-4.1	-0.01	0	-3.74	25.03	-1.7	2	2	0	8	170	1110000000000	-247927	-34.38	0.87	136.73	126.12	2.1	0	12.89	167	25.9	432	122	12.95	9.67	6.77	18.33	-4	-2.61	13.02	67.5	1	1	3	0
Hypoxanthine	Pure water	Pure methanol	50% B isocratic elution	-0.0415223	-0.16	-0.46	1.31	-0.98	-1.49	-4.43	-0.59	0	-3.23	25.03	-0.5	2	3	0	10	190	11100000000000	-305849	-25.27	0.97	150.2	143.93	2.16	0.01	2.51	159	5.76	351	-26.8	8.83	8.14	3.33	11.33	-6.92	-2.86	2.6	70.1	2	2	4	0
Xanthine	Pure water	Pure methanol	50% B isocratic elution	-0.534347	-1.08	-0.57	1.37	-1.1	-1.47	-4.68	-0.59	0	-3.07	25.03	-0.7	3	3	0	11	217	111000000000000	-353097	-23.72	1.25	159.89	153.96	2.19	0.01	6.06	170	-15.1	367	-128	7.64	10.2	7.74	22.93	-2.99	-2.73	6.1	86.9	2	2	4	0
Guanine	Pure water	Pure methanol	50% B isocratic elution	0.0859662	0.13	-0.64	0.35	-1.27	-1.86	-4.84	-0.59	0	-3.43	25.03	-1.1	3	3	0	11	225	1110000000000000	-340610	-30.43	1.22	164.42	158.81	2.2	0.01	3.28	191	-7.34	441	-50.1	10.78	11.63	4.81	13.86	-5.99	-2.81	3.34	96.2	2	2	5	0
Adenine	Pure water	Pure methanol	50% B isocratic elution	0.992599	1.2	-0.7	0.65	-1.2	-1.6	-4.6	-0.59	0	-3.15	25.03	-0.1	2	4	0	10	127	111000000000000	-293365	-30.51	0.99	153.88	148.09	2.17	0	11.17	161	9.31	380	47.5	10.2	8.73	5.5	15	-4.52	-2.45	11.33	80.5	2	2	5	0
Beta-Thymidine	Pure water	Pure methanol	50% B isocratic elution	-1.18024	-1.93	-1.28	1.16	-1.6	-1.53	-7.34	-0.97	0	-2.6	25.03	-1.2	3	5	2	17	381	1.11e+30	-549390	-24.52	1.42	246.36	266.66	2.43	0.01	4.01	176	50.1	310	96.6	9.28	5.39	15.53	45.1	-0.93	-3.96	6.43	99.1	1	2	2	0
Cytidine	Pure water	Pure methanol	50% B isocratic elution	-0.462902	-0.32	-1.6	-2.05	-2.07	-2.32	-7.04	-0.97	0	-3.1	25.03	-2.1	4	5	2	17	383	1.11e+29	-559442	-33.42	1.74	241.37	261.47	2.42	0.01	6.86	228	40.6	467	146	13.35	9.24	15.82	45.67	-2.4	-3.46	9.4	129	1	2	3	0
Inosine	Pure water	Pure methanol	50% B isocratic elution	-1.26739	-1.44	-1.79	-1.34	-2.54	-2.37	-7.53	-1.55	0	-2.99	25.03	-1.3	4	7	2	19	405	1.11e+30	-617361	-37.38	1.8	261.27	285.84	2.46	0.01	9.42	243	21.5	459	3.18	11.36	10.23	10.31	29.87	-2.75	-2.08	9.18	129	2	3	4	0
Xanthosine	Pure water	Pure methanol	50% B isocratic elution	-1.14875	-0.85	-1.77	-1.92	-2.41	-2.32	-7.6	-1.55	0	-2.9	25.03	-2.4	5	7	2	20	434	1.11e+31	-664603	-37.75	1.91	265.99	291.82	2.47	0.01	15.45	240	28.5	439	14	11	9.33	12.24	32.43	-2.45	-3.34	12.18	146	2	3	4	0
Guanosine	Pure water	Pure methanol	50% B isocratic elution	-0.868234	-1.3	-2.04	-2.39	-2.88	-2.63	-7.97	-1.55	0	-3.07	25.03	-1.9	5	7	2	20	446	1.11e+32	-652123	-42.64	2.09	276.17	298.73	2.48	0.01	11.43	271	-5.63	543	-85.9	12.26	14.35	13.14	36.02	-2.86	-2.22	11.13	155	2	3	5	0
Uridine	Pure water	Pure methanol	50% B isocratic elution	-1.37642	-0.63	-1.34	-0.25	-1.56	-1.56	-6.82	-0.97	0	-2.67	25.03	-2	4	6	2	17	371	1.11e+28	-571934	-25.98	1.71	235.87	256.94	2.41	0.01	5.57	194	28.6	328	37.3	8.29	6.3	11.64	34.25	-0.98	-1.56	4.28	119	1	2	2	0
Adenosine	Pure water	Pure methanol	50% B isocratic elution	-0.223123	0.06	-1.42	0.66	-2.36	-1.46	-7.51	-1.55	0	-2.04	25.03	-1.1	4	8	2	19	335	1.11e+31	-604889	-23.66	1.73	253.58	283.19	2.45	0.01	2.18	191	36.3	322	107	8.99	5.54	14.19	39.95	-0.74	-3.53	3.84	140	2	3	5	0
D-Pantothenic acid	Pure water	Pure methanol	65% B isocratic elution	-1.03127	-1.22	-1.45	1.6	-0.27	-1.87	-7.43	1.14	0	-3.34	27.13	-1.1	4	5	6	15	239	1.11e+31	-492236	-26.02	1.56	247.96	269.32	2.43	0	7.46	186	7.26	354	-39.4	8.13	8.95	6.22	23.15	-1.05	-7.18	4.69	107	0	0	1	0
niacinamide	Pure water	Pure methanol	65% B isocratic elution	0.754513	0.64	-0.43	3.02	-0.45	-0.87	-4.73	-0.01	0	-2.8	27.13	-0.4	1	2	1	9	114	111000000000000	-261773	-16.8	0.79	152.74	146.35	2.17	0	2.95	112	27.7	215	95.8	7.01	3.68	5.08	12.91	-3.24	-5.1	4.94	56	1	1	2	0
Pyridoxal	Pure water	Pure methanol	65% B isocratic elution	0.522022	1.05	-0.63	2.47	-0.94	-1.12	-5.71	-0.01	0	-2.48	27.13	0	2	4	2	12	162	1.11e+20	-370806	-16.87	1.08	190.02	193.09	2.29	0.01	3.53	121	8.31	226	-19.7	4.94	5.51	5.04	18.08	-1.4	-2.71	3.58	70.4	1	1	1	0
Pyridoxine	Pure water	Pure methanol	65% B isocratic elution	1.00071	1.65	-0.89	1.77	-1.1	-1.35	-5.88	-0.01	0	-2.71	27.13	-0.8	3	4	2	12	142	1.11e+22	-371565	-22.39	1.06	195.11	198.18	2.3	0	9.44	137	11.5	264	32	6.46	6.06	11.25	32	0.01	-3.22	2.9	73.6	1	1	1	0
Pyridoxamine	Pure water	Pure methanol	65% B isocratic elution	1.01	1.48	-0.82	2.14	-1.04	-1.41	-6.03	-0.01	0	-2.66	27.13	-1	3	4	2	12	143	1.11e+23	-359090	-19.85	1.23	199.15	205.79	2.31	0.01	2.37	144	49.5	321	233	9.73	4.96	8.51	18.04	-0.23	-3.37	4.35	79.4	1	1	2	0
Thiamine	Pure water	Pure methanol	65% B isocratic elution	0.796377	1.27	0	0	-1.12	-1.35	-9.35	-0.97	0	-3.25	27.13	0	2	6	4	19	269	1.11e+34	-727954	-65.42	1.49	291.55	320.17	2.51	-0.99	0	200	-71.2	335	-70.9	6.56	7.95	14.5	36.27	1.75	-2.99	10.15	104	2	2	4	1
Nicotinicacid	Pure water	Pure methanol	65% B isocratic elution	0.174513	-0.22	-0.22	3.56	-0.65	-0.87	-4.47	-0.01	0	-2.41	27.13	0.4	1	3	1	9	114	11100000000000	-274248	-12.08	0.77	149.15	142	2.15	0	0.88	92.9	1.16	177	-39.1	3.37	4.37	3.73	20.67	-2.73	-2.8	3.67	50.2	1	1	1	0
Alanine	Pure water	Pure methanol	65% B isocratic elution	-0.275076	-0.36	-0.24	3.79	0.65	-1.01	-3.62	1.14	0	-3.06	27.13	-3	2	3	1	6	61.8	1110000000000	-203245	-12.07	0.88	123.86	112.49	2.05	0	1.93	103	20.6	223	81.1	5.25	4.15	6.92	15.51	-0.69	-4.07	2.88	63.3	0	0	1	0
Leucine	Pure water	Pure methanol	65% B isocratic elution	0.233635	0.17	-0.29	3.98	0.31	-0.88	-5.4	1.14	0	-2.69	27.13	-1.5	2	3	3	9	101	1.11e+21	-277279	-11.49	0.91	176.64	178.51	2.25	0	1.75	97.3	10	188	15.9	4.1	4.03	4.32	23.12	-1.46	-4.42	4.6	63.3	0	0	1	0
Isoleucine	Pure water	Pure methanol	65% B isocratic elution	0.346609	0.22	-0.29	3.99	0.28	-0.85	-5.35	1.14	0	-2.66	27.13	-1.7	2	3	3	9	103	1.11e+21	-277278	-11.39	0.9	174.76	177.8	2.25	0	1.86	95.2	4.07	178	-13.2	3.66	4.06	5.29	24.73	-0.48	-4.81	8.21	63.3	0	0	1	0
Valine	Pure water	Pure methanol	65% B isocratic elution	0.426984	0.08	-0.35	3.48	0.99	-0.56	-4.74	1.14	0	-3.09	27.13	-2.3	2	3	2	8	90.4	1.11e+18	-252603	-16.64	0.58	154.87	154.22	2.19	0	7.95	86.9	30.2	126	74.6	3.87	1.16	5.48	13.49	-1.89	-5.23	8.12	63.3	0	0	1	0
Proline	Pure water	Pure methanol	65% B isocratic elution	0.117012	0.27	-0.31	3.62	-0.4	-0.92	-4.44	0.18	0	-2.61	27.13	-2.5	2	3	1	8	103	1.11e+16	-251835	-13.13	0.77	147.6	142.26	2.15	0	3.61	94.9	18	192	36.7	4.47	4	3.51	21.36	-3.35	-4.13	3.48	49.3	1	1	1	0
Phenylalanine	Pure water	Pure methanol	65% B isocratic elution	0.371327	0	-0.65	2.97	-0.71	-0.95	-6.16	-0.01	0	-2.55	27.13	-1.5	2	3	3	12	153	1.11e+22	-348280	-15.74	1.01	200.74	208.03	2.32	0	2.66	122	9.49	216	30.8	4.48	4.38	4.16	22.91	-1.94	-2.63	7.78	63.3	0	1	1	0
Methionine	Pure water	Pure methanol	65% B isocratic elution	-0.2398	-0.32	-0.59	3.26	0.27	-1.01	-5.9	1.14	0	-2.96	27.13	-1.9	2	4	4	9	97	1.11e+19	-502501	-15.83	1.08	186.45	185.96	2.27	0.01	4.25	126	19.1	229	42.1	4.86	4.41	4.94	22.93	-1.51	-3.09	4.05	88.6	0	0	1	1
Tryptophan	Pure water	Pure methanol	65% B isocratic elution	-0.0688919	-0.43	-1.12	1.74	-1.46	-1.13	-7.19	-0.59	0	-2.51	27.13	-1.1	3	3	3	15	245	1.11e+26	-430876	-21.02	1.24	233.33	250.05	2.4	0	5.34	153	-10.6	271	-20.2	4.73	6.7	4.11	22.25	-1.98	-4.08	5.74	79.1	1	2	2	0
Serine	Pure water	Pure methanol	65% B isocratic elution	-0.297311	-0.87	-0.37	2.82	0.64	-1.04	-3.78	1.14	0	-3.16	27.13	-3.1	3	4	2	7	72.6	11100000000000	-250467	-14.94	1.06	132.32	122.02	2.09	0	3.06	118	4.07	216	-33.2	4.49	4.85	3.58	19.55	-4.08	-3.26	0.99	83.6	0	0	1	0
Glutamine	Pure water	Pure methanol	65% B isocratic elution	-0.604132	-0.7	-0.77	1.53	0.5	-1.59	-5.28	1.14	0	-3.77	27.13	-3.1	3	4	4	10	146	1.11e+19	-333835	-24.89	1.35	180.5	176.05	2.25	0	6.95	174	25	351	64	9.61	7.18	5.6	22.19	-3.61	-5.52	7.53	106	0	0	2	0
Threonine	Pure water	Pure methanol	65% B isocratic elution	-0.210856	-0.7	-0.44	3.49	0.41	-1.07	-4.35	1.14	0	-2.96	27.13	-2.9	3	4	2	8	93.3	1.11e+16	-275147	-14.56	1.14	149.43	144.38	2.16	0.01	4	119	6.4	228	-10.9	5.24	4.98	2.45	17.53	-4.59	-5.42	3.68	83.6	0	0	1	0
Cysteine	Pure water	Pure methanol	65% B isocratic elution	-0.597928	-1.27	-0.45	3.62	0.22	-0.81	-4.7	1.14	0	-2.79	27.13	-2.5	3	4	2	7	75.3	11100000000000	-453148	-13.45	1	147.18	141.36	2.15	0.01	3.06	108	-15.6	173	-97.6	1.79	4.69	5.27	20.11	-1.25	-3.34	5	64.3	0	0	1	1
Asparagine	Pure water	Pure methanol	65% B isocratic elution	-0.752414	-1.05	-0.53	2.07	0.71	-1.62	-4.61	1.14	0	-3.98	27.13	-3.4	3	4	3	9	134	1.11e+16	-309157	-24.85	1.33	160.84	155.26	2.19	0	3.88	177	14.7	352	34.5	9.05	7.57	3.77	19.29	-6.05	-4.96	6.4	106	0	0	2	0
Glutamicacid	Pure water	Pure methanol	65% B isocratic elution	-0.69129	-1.95	-0.65	2.12	0.92	-1.22	-4.97	1.14	0	-3.79	27.13	-3.7	3	5	4	10	145	1.11e+18	-346311	-25.1	1.06	172.73	167.41	2.22	0	8.05	150	9.3	247	-26.7	4.8	5.32	4.16	20.54	-4.48	-4.16	4.84	101	0	0	1	1
Lysine	Pure water	Pure methanol	65% B isocratic elution	0.0199514	0.27	-0.79	2.83	0.9	-0.99	-5.83	1.14	0	-3.45	27.13	-3	3	4	5	10	106	1.11e+23	-312026	-21.17	0.86	191.1	191.01	2.28	0	5.99	127	75.3	255	325	8.64	1.15	8.95	18.74	-1	-1.73	0.96	89.3	0	0	2	0
Arginine	Pure water	Pure methanol	65% B isocratic elution	0.0352633	0.95	-1.12	1.47	0.67	-1.35	-6.49	1.14	0	-3.8	27.13	-4.2	4	4	5	12	176	1.11e+25	-380778	-28.48	1.38	214.93	214.24	2.33	0	9.11	182	56.4	339	241	10.62	3.9	10.66	22.26	-2.7	-2.93	1.97	128	0	0	4	0
Histidine	Pure water	Pure methanol	65% B isocratic elution	0.258234	0.49	-0.73	1.3	0.12	-1.21	-5.4	0.18	0	-3.67	27.13	-3.2	3	4	3	11	151	1.11e+19	-344509	-27.47	0.98	180.91	181.77	2.26	0	5.04	160	36.7	296	139	8.38	4.38	5.7	14.6	-3.9	-4.52	8.26	92	1	1	3	0
Citrulline	Pure water	Pure methanol	65% B isocratic elution	-0.0652111	-0.9	-1.1	1.3	0.38	-1.92	-6.35	1.14	0	-4.04	27.13	-4.3	4	4	5	12	171	1.11e+24	-393268	-29.64	1.53	214.73	215.15	2.33	0	7.6	204	40.5	433	151	12.42	8.36	5.05	24.14	-4.38	-3.03	2.31	118	0	0	3	0
Taurine	Pure water	Pure methanol	65% B isocratic elution	-1.14824	-0.99	-0.52	3.08	0.74	-1.25	-4.07	1.14	0	-3.53	27.13	-4.1	2	4	2	7	120	11100000000000	-476406	-18.56	1.09	143.51	133.49	2.13	0.01	3.57	138	-7.89	285	-71.8	4.16	6.16	-2.47	10.55	-10.36	-3.86	3.47	88.8	0	0	1	1
Tyrosine	Pure water	Pure methanol	65% B isocratic elution	-0.000739025	0.83	-1.04	2.22	-0.95	-1.47	-6.3	-0.01	0	-2.9	27.13	-2.3	3	4	3	13	176	1.11e+23	-395507	-20.45	1.27	210.41	219.03	2.34	0	4.34	158	-11.2	301	-58.2	5.35	7.81	4.18	23.28	-2.58	-2.6	8.84	83.6	0	1	1	0
Hypotaurine	Pure water	Pure methanol	65% B isocratic elution	-0.616179	-0.94	-0.39	3.16	0.64	-1.23	-4.16	1.14	0	-3.48	27.13	-1.5	2	4	2	6	55.5	1110000000000	-429187	-19.14	0.95	136.46	125.99	2.1	0	5.56	129	43.8	272	164	8.05	3.84	8.34	19	-1.9	-2.55	5.19	82.5	0	0	1	1
L-Hydroxyproline	Pure water	Pure methanol	65% B isocratic elution	-0.20909	-0.44	-0.57	2.82	-0.44	-1.46	-4.54	0.18	0	-3.11	27.13	-3.3	3	4	1	9	125	1.11e+17	-299059	-18.75	1.12	155.95	154.27	2.19	0	3.05	140	34.4	301	118	8.1	5.75	7.9	18.5	-1.19	-2.19	3.72	69.6	1	1	1	0
N-omiga-acetylhistamine	Pure water	Pure methanol	65% B isocratic elution	0.869944	1.72	-0.92	2.28	-0.22	-1.31	-6.09	0.18	0	-3.42	27.13	-0.4	2	2	3	11	138	1.11e+21	-321960	-23.57	0.83	195.51	194.44	2.29	0	4.66	148	58.4	320	214	11.2	4.88	6.06	14.64	-2.8	-2.61	4.77	57.8	1	1	3	0
L-pyroglutamicacid	Pure water	Pure methanol	65% B isocratic elution	-0.648488	-1.06	-0.51	2.43	-0.17	-1.28	-4.4	0.18	0	-3.28	27.13	-0.8	2	3	1	9	154	1110000000000000	-298326	-20.95	0.96	151.34	146.44	2.17	0	7.17	137	11.3	267	-26.3	6.36	6.48	3.66	21.17	-4.87	-2.3	6.22	66.4	1	1	1	0
Tyramine	Pure water	Pure methanol	65% B isocratic elution	0.391016	1.13	-0.48	3.22	-0.79	-0.96	-5.75	-0.01	0	-2.51	27.13	1.1	2	2	2	10	87.3	1.11e+20	-277120	-13.98	0.82	183.62	181.83	2.26	0	2.6	106	27.2	227	168	5.88	3.52	8.82	18.57	0.95	-2.63	3.17	46.2	0	1	1	0
Histamine	Pure water	Pure methanol	65% B isocratic elution	0.411284	0.1	-0.63	2.94	-0.19	-1.12	-4.82	0.18	0	-3.11	27.13	-0.7	2	2	2	8	64.7	1.11e+16	-226118	-18.32	0.8	155.19	146.49	2.17	0	4.89	122	68.6	307	360	10.5	2.98	8.7	18.47	-1.26	-2.85	4.92	54.7	1	1	3	0
AaC	Pure water	Pure methanol	65% B isocratic elution	0.934422	1.7	-0.68	2.2	-2.2	-0.53	-6.74	-1.36	0.01	-1.73	27.13	2.6	2	2	0	14	219	1.11e+22	-369670	-14.85	0.86	210.7	216.51	2.34	0	2.51	108	-19	154	-31.5	2.67	3.95	5.78	12.59	0.02	-2.83	2.59	54.7	2	3	3	0
IQx	Pure water	Pure methanol	65% B isocratic elution	1.00949	1.57	-0.97	0.96	-1.92	-1.07	-6.8	-1.36	0	-2.35	27.13	0.6	1	4	0	15	246	1.11e+23	-414479	-25.04	0.93	218.25	227.81	2.36	0.01	8.8	141	56.1	274	235	9.64	3.08	5.71	14.84	-2.23	-2.75	8.88	69.6	2	3	5	0
8-MeIQx	Pure water	Pure methanol	65% B isocratic elution	1.14935	1.59	-1.1	0.92	-2.05	-1.09	-7.45	-1.36	0	-2.26	27.13	1	1	4	0	16	271	1.11e+26	-439162	-25.13	0.98	237.6	249.06	2.4	0.01	7.72	142	63.8	281	265	10.06	2.97	5.88	15.22	-1.59	-1.95	7.78	69.6	2	3	5	0
MeIQ	Pure water	Pure methanol	65% B isocratic elution	1.24877	1.69	-0.92	1.35	-2.24	-0.79	-7.53	-1.36	0.01	-1.85	27.13	2	1	3	0	16	270	1.11e+27	-429091	-21.18	0.93	236.91	253.92	2.4	0	9.17	124	38.5	216	166	7.22	2.74	7.22	16.13	0.27	-4.33	9.28	56.7	2	3	4	0
IQ[4,5-b]	Pure water	Pure methanol	65% B isocratic elution	0.981095	1.59	-1.04	0.7	-2.02	-1.05	-7.05	-1.36	0	-2.38	27.13	1.7	1	3	0	15	245	1.11e+24	-404413	-27.45	0.9	223.43	232.81	2.37	0	10.84	139	39.2	269	182	8.87	4.02	6.83	16.69	-0.82	-4.58	11	56.7	2	3	4	0
Harman	Pure water	Pure methanol	65% B isocratic elution	1.38592	1.83	-0.33	2.69	-2.23	-0.45	-6.95	-1.36	0.01	-1.53	27.13	3.6	1	1	0	14	216	1.11e+23	-359587	-12.73	0.59	214.44	223.28	2.35	0	4.55	81.6	10	132	63.3	3.7	2.33	7.72	16.34	1.94	-4.95	4.58	28.7	2	3	2	0
IQ	Pure water	Pure methanol	65% B isocratic elution	1.13413	1.77	-0.84	1.43	-2.16	-0.77	-7.05	-1.36	0	-1.93	27.13	1.5	1	3	0	15	245	1.11e+24	-404413	-20.86	0.92	222.22	233.02	2.37	0	8.83	123	32.7	213	148	6.9	2.78	7	15.75	-0.15	-2.69	8.95	56.7	2	3	4	0
Norharman	Pure water	Pure methanol	65% B isocratic elution	1.18559	1.84	-0.4	2.73	-2.1	-0.51	-6.34	-1.36	0.01	-1.73	27.13	3.2	1	1	0	13	193	1.11e+20	-334905	-13.23	0.56	196.55	201.82	2.3	0	4.61	85.1	3.38	142	46.2	3.74	2.88	7.61	16.32	1.37	-4.84	4.64	28.7	2	3	2	0
DMIP	Pure water	Pure methanol	65% B isocratic elution	1.2285	1.77	-0.89	1.51	-1.05	-1.1	-6.11	-0.59	0	-2.77	27.13	1	1	3	0	12	172	1.11e+21	-332645	-25.27	0.81	195.56	198.01	2.3	0.01	9.99	128	57.4	269	243	9.75	3.19	7.16	17.5	-1.15	-4.24	10.15	56.7	2	2	4	0
Phe-p-1	Pure water	Pure methanol	65% B isocratic elution	1.40482	1.91	-0.38	2.74	-1.95	-0.43	-6.74	-1.16	0.01	-1.67	27.13	2.3	1	2	1	13	152	1.11e+22	-335660	-12.87	0.73	209.56	213.73	2.33	0	3.22	91.3	4.88	123	51	3.16	1.78	7	14.9	1.32	-6	3.7	38.9	1	2	2	0
7,8-DiMeIQx	Pure water	Pure methanol	65% B isocratic elution	1.09437	1.74	-1.19	0.84	-2.18	-1.1	-8.02	-1.36	0	-2.15	27.13	1.4	1	4	0	17	297	1.11e+29	-463843	-25.35	1.03	254.55	269.67	2.43	0.01	6.62	143	68.9	284	281	10.44	2.87	6.01	15.48	-1.09	-4.51	6.74	69.6	2	3	5	0
Sarcosine	Pure water	Pure methanol	65% B isocratic elution	-0.362082	-0.36	-0.2	4.28	0.66	-0.95	-3.78	1.14	0	-3.04	27.13	-2.8	2	3	2	6	52.8	1110000000000	-203238	-12.38	0.78	127.98	113.01	2.05	0	2.92	94.2	17.5	201	42.4	4.57	4.19	4.37	24.65	-2.74	-4.93	8.22	49.3	0	0	1	0
Creatinine	Pure water	Pure methanol	65% B isocratic elution	0.578802	1.2	-0.52	1.29	0.1	-1.4	-4.37	0.18	0	-3.75	27.13	-1.8	1	1	0	8	151	111000000000000	-248681	-30.05	0.8	143.83	134.46	2.13	0	11.98	146	74.4	333	274	12.86	4.35	5.11	15.98	-5.3	-5.49	12.08	58.7	1	1	3	0
L-dihydrooroticacid	Pure water	Pure methanol	65% B isocratic elution	-1.76833	-1.53	-0.62	1.72	-0.43	-1.49	-4.72	-0.01	0	-3.38	27.13	-1.5	3	4	1	11	225	1.11e+16	-379565	-23.86	1.38	167.39	163.4	2.21	0.01	5.18	172	-17.2	327	-144	5.51	8.7	2.35	17.25	-6.68	-4.92	4.87	95.5	1	1	2	0
L-Carnosine	Pure water	Pure methanol	65% B isocratic elution	0.14879	0.29	-1.49	-0.26	-0.6	-2.19	-7.61	0.18	0	-3.96	27.13	-4	4	5	6	16	259	1.11e+29	-499765	-38.44	1.62	256.29	270.05	2.43	0	12.99	233	51	527	223	14.27	9.82	9.18	20.43	-2.61	-2.2	9.07	121	1	1	4	0
Betaine	Pure water	Pure methanol	65% B isocratic elution	0.655424	1.02	-1.25	-0.47	1.36	-1.96	-4.71	1.14	0	-4.95	27.13	0.5	0	2	1	8	87.6	1.11e+18	-252565	-41.59	0.81	153.39	154.86	2.19	0	15.35	178	181	468	789	21.46	0.08	1.63	14.25	-9.97	-2.66	15.47	40.1	0	0	1	0
Cytosine	Pure water	Pure methanol	65% B isocratic elution	0.512581	1.03	-0.06	0.33	-0.49	-1.73	-4.14	-0.01	0	-3.87	27.13	-1.7	2	2	0	8	170	1110000000000	-247927	-34.38	0.87	136.73	126.12	2.1	0	12.89	167	25.9	432	122	12.95	9.67	6.77	18.33	-4	-2.61	13.02	67.5	1	1	3	0
Hypoxanthine	Pure water	Pure methanol	65% B isocratic elution	-0.0883824	-0.11	-0.29	1.31	-0.88	-1.37	-4.48	-0.59	0	-3.34	27.13	-0.5	2	3	0	10	190	11100000000000	-305849	-25.27	0.97	150.2	143.93	2.16	0.01	2.51	159	5.76	351	-26.8	8.83	8.14	3.33	11.33	-6.92	-2.86	2.6	70.1	2	2	4	0
Xanthine	Pure water	Pure methanol	65% B isocratic elution	-0.557572	-1.18	-0.43	1.37	-1.05	-1.35	-4.73	-0.59	0	-3.15	27.13	-0.7	3	3	0	11	217	111000000000000	-353097	-23.72	1.25	159.89	153.96	2.19	0.01	6.06	170	-15.1	367	-128	7.64	10.2	7.74	22.93	-2.99	-2.73	6.1	86.9	2	2	4	0
Guanine	Pure water	Pure methanol	65% B isocratic elution	0.0483335	0	-0.41	0.35	-1.14	-1.72	-4.89	-0.59	0	-3.56	27.13	-1.1	3	3	0	11	225	1110000000000000	-340610	-30.43	1.22	164.42	158.81	2.2	0.01	3.28	191	-7.34	441	-50.1	10.78	11.63	4.81	13.86	-5.99	-2.81	3.34	96.2	2	2	5	0
Adenine	Pure water	Pure methanol	65% B isocratic elution	0.962021	1.18	-0.53	0.65	-1.12	-1.48	-4.64	-0.59	0	-3.26	27.13	-0.1	2	4	0	10	127	111000000000000	-293365	-30.51	0.99	153.88	148.09	2.17	0	11.17	161	9.31	380	47.5	10.2	8.73	5.5	15	-4.52	-2.45	11.33	80.5	2	2	5	0
Cytidine	Pure water	Pure methanol	65% B isocratic elution	-0.469036	-0.44	-1.44	-2.05	-2.07	-2.15	-7.12	-0.97	0	-3.2	27.13	-2.1	4	5	2	17	383	1.11e+29	-559442	-33.42	1.74	241.37	261.47	2.42	0.01	6.86	228	40.6	467	146	13.35	9.24	15.82	45.67	-2.4	-3.46	9.4	129	1	2	3	0
Inosine	Pure water	Pure methanol	65% B isocratic elution	-1.27853	-1.21	-1.62	-1.34	-2.55	-2.19	-7.63	-1.55	0	-3.09	27.13	-1.3	4	7	2	19	405	1.11e+30	-617361	-37.38	1.8	261.27	285.84	2.46	0.01	9.42	243	21.5	459	3.18	11.36	10.23	10.31	29.87	-2.75	-2.08	9.18	129	2	3	4	0
Xanthosine	Pure water	Pure methanol	65% B isocratic elution	-1.15016	-0.83	-1.62	-1.92	-2.45	-2.14	-7.7	-1.55	0	-2.99	27.13	-2.4	5	7	2	20	434	1.11e+31	-664603	-37.75	1.91	265.99	291.82	2.47	0.01	15.45	240	28.5	439	14	11	9.33	12.24	32.43	-2.45	-3.34	12.18	146	2	3	4	0
Guanosine	Pure water	Pure methanol	65% B isocratic elution	-0.867354	-1.27	-1.84	-2.39	-2.88	-2.43	-8.07	-1.55	0	-3.18	27.13	-1.9	5	7	2	20	446	1.11e+32	-652123	-42.64	2.09	276.17	298.73	2.48	0.01	11.43	271	-5.63	543	-85.9	12.26	14.35	13.14	36.02	-2.86	-2.22	11.13	155	2	3	5	0
Uridine	Pure water	Pure methanol	65% B isocratic elution	-1.36826	-0.47	-1.31	-0.25	-1.69	-1.43	-6.9	-0.97	0	-2.71	27.13	-2	4	6	2	17	371	1.11e+28	-571934	-25.98	1.71	235.87	256.94	2.41	0.01	5.57	194	28.6	328	37.3	8.29	6.3	11.64	34.25	-0.98	-1.56	4.28	119	1	2	2	0
Adenosine	Pure water	Pure methanol	65% B isocratic elution	-0.196472	-0.18	-1.43	0.66	-2.56	-1.33	-7.59	-1.55	0	-2.07	27.13	-1.1	4	8	2	19	335	1.11e+31	-604889	-23.66	1.73	253.58	283.19	2.45	0.01	2.18	191	36.3	322	107	8.99	5.54	14.19	39.95	-0.74	-3.53	3.84	140	2	3	5	0
D-Pantothenic acid	Pure water	Pure methanol	80% B isocratic elution	-1.01728	-1.29	-1.4	1.6	-0.38	-1.75	-7.49	1.14	0	-3.39	29.24	-1.1	4	5	6	15	239	1.11e+31	-492236	-26.02	1.56	247.96	269.32	2.43	0	7.46	186	7.26	354	-39.4	8.13	8.95	6.22	23.15	-1.05	-7.18	4.69	107	0	0	1	0
niacinamide	Pure water	Pure methanol	80% B isocratic elution	0.735292	0.64	-0.39	3.02	-0.48	-0.79	-4.77	-0.01	0	-2.84	29.24	-0.4	1	2	1	9	114	111000000000000	-261773	-16.8	0.79	152.74	146.35	2.17	0	2.95	112	27.7	215	95.8	7.01	3.68	5.08	12.91	-3.24	-5.1	4.94	56	1	1	2	0
Pyridoxal	Pure water	Pure methanol	80% B isocratic elution	0.517157	0.94	-0.66	2.47	-1.09	-1.05	-5.77	-0.01	0	-2.49	29.24	0	2	4	2	12	162	1.11e+20	-370806	-16.87	1.08	190.02	193.09	2.29	0.01	3.53	121	8.31	226	-19.7	4.94	5.51	5.04	18.08	-1.4	-2.71	3.58	70.4	1	1	1	0
Pyridoxine	Pure water	Pure methanol	80% B isocratic elution	0.994407	1.65	-0.88	1.77	-1.2	-1.27	-5.93	-0.01	0	-2.74	29.24	-0.8	3	4	2	12	142	1.11e+22	-371565	-22.39	1.06	195.11	198.18	2.3	0	9.44	137	11.5	264	32	6.46	6.06	11.25	32	0.01	-3.22	2.9	73.6	1	1	1	0
Pyridoxamine	Pure water	Pure methanol	80% B isocratic elution	1.00918	1.47	-0.8	2.14	-1.14	-1.31	-6.09	-0.01	0	-2.69	29.24	-1	3	4	2	12	143	1.11e+23	-359090	-19.85	1.23	199.15	205.79	2.31	0.01	2.37	144	49.5	321	233	9.73	4.96	8.51	18.04	-0.23	-3.37	4.35	79.4	1	1	2	0
Thiamine	Pure water	Pure methanol	80% B isocratic elution	0.790039	1.32	0	0	-1.26	-1.26	-9.42	-0.97	0	-3.28	29.24	0	2	6	4	19	269	1.11e+34	-727954	-65.42	1.49	291.55	320.17	2.51	-0.99	0	200	-71.2	335	-70.9	6.56	7.95	14.5	36.27	1.75	-2.99	10.15	104	2	2	4	1
Nicotinicacid	Pure water	Pure methanol	80% B isocratic elution	0.162149	-0.41	-0.26	3.56	-0.78	-0.81	-4.52	-0.01	0	-2.42	29.24	0.4	1	3	1	9	114	11100000000000	-274248	-12.08	0.77	149.15	142	2.15	0	0.88	92.9	1.16	177	-39.1	3.37	4.37	3.73	20.67	-2.73	-2.8	3.67	50.2	1	1	1	0
Alanine	Pure water	Pure methanol	80% B isocratic elution	-0.295225	-0.46	-0.24	3.79	0.61	-0.94	-3.65	1.14	0	-3.09	29.24	-3	2	3	1	6	61.8	1110000000000	-203245	-12.07	0.88	123.86	112.49	2.05	0	1.93	103	20.6	223	81.1	5.25	4.15	6.92	15.51	-0.69	-4.07	2.88	63.3	0	0	1	0
Leucine	Pure water	Pure methanol	80% B isocratic elution	0.244124	0.09	-0.36	3.98	0.13	-0.82	-5.44	1.14	0	-2.69	29.24	-1.5	2	3	3	9	101	1.11e+21	-277279	-11.49	0.91	176.64	178.51	2.25	0	1.75	97.3	10	188	15.9	4.1	4.03	4.32	23.12	-1.46	-4.42	4.6	63.3	0	0	1	0
Isoleucine	Pure water	Pure methanol	80% B isocratic elution	0.353163	0.13	-0.37	3.99	0.1	-0.8	-5.39	1.14	0	-2.65	29.24	-1.7	2	3	3	9	103	1.11e+21	-277278	-11.39	0.9	174.76	177.8	2.25	0	1.86	95.2	4.07	178	-13.2	3.66	4.06	5.29	24.73	-0.48	-4.81	8.21	63.3	0	0	1	0
Valine	Pure water	Pure methanol	80% B isocratic elution	0.40749	-0.02	-0.36	3.48	0.9	-0.51	-4.78	1.14	0	-3.11	29.24	-2.3	2	3	2	8	90.4	1.11e+18	-252603	-16.64	0.58	154.87	154.22	2.19	0	7.95	86.9	30.2	126	74.6	3.87	1.16	5.48	13.49	-1.89	-5.23	8.12	63.3	0	0	1	0
Proline	Pure water	Pure methanol	80% B isocratic elution	0.105242	0.19	-0.34	3.62	-0.5	-0.86	-4.48	0.18	0	-2.62	29.24	-2.5	2	3	1	8	103	1.11e+16	-251835	-13.13	0.77	147.6	142.26	2.15	0	3.61	94.9	18	192	36.7	4.47	4	3.51	21.36	-3.35	-4.13	3.48	49.3	1	1	1	0
Phenylalanine	Pure water	Pure methanol	80% B isocratic elution	0.359944	-0.08	-0.68	2.97	-0.87	-0.89	-6.22	-0.01	0	-2.57	29.24	-1.5	2	3	3	12	153	1.11e+22	-348280	-15.74	1.01	200.74	208.03	2.32	0	2.66	122	9.49	216	30.8	4.48	4.38	4.16	22.91	-1.94	-2.63	7.78	63.3	0	1	1	0
Methionine	Pure water	Pure methanol	80% B isocratic elution	-0.244458	-0.47	-0.62	3.26	0.13	-0.94	-5.95	1.14	0	-2.98	29.24	-1.9	2	4	4	9	97	1.11e+19	-502501	-15.83	1.08	186.45	185.96	2.27	0.01	4.25	126	19.1	229	42.1	4.86	4.41	4.94	22.93	-1.51	-3.09	4.05	88.6	0	0	1	1
Tryptophan	Pure water	Pure methanol	80% B isocratic elution	-0.0577008	-0.49	-1.12	1.74	-1.64	-1.06	-7.25	-0.59	0	-2.53	29.24	-1.1	3	3	3	15	245	1.11e+26	-430876	-21.02	1.24	233.33	250.05	2.4	0	5.34	153	-10.6	271	-20.2	4.73	6.7	4.11	22.25	-1.98	-4.08	5.74	79.1	1	2	2	0
Serine	Pure water	Pure methanol	80% B isocratic elution	-0.33332	-0.91	-0.36	2.82	0.6	-0.98	-3.82	1.14	0	-3.2	29.24	-3.1	3	4	2	7	72.6	11100000000000	-250467	-14.94	1.06	132.32	122.02	2.09	0	3.06	118	4.07	216	-33.2	4.49	4.85	3.58	19.55	-4.08	-3.26	0.99	83.6	0	0	1	0
Glutamine	Pure water	Pure methanol	80% B isocratic elution	-0.631837	-0.77	-0.65	1.53	0.53	-1.48	-5.33	1.14	0	-3.85	29.24	-3.1	3	4	4	10	146	1.11e+19	-333835	-24.89	1.35	180.5	176.05	2.25	0	6.95	174	25	351	64	9.61	7.18	5.6	22.19	-3.61	-5.52	7.53	106	0	0	2	0
Threonine	Pure water	Pure methanol	80% B isocratic elution	-0.222463	0.27	-0.46	3.49	0.32	-1	-4.39	1.14	0	-2.98	29.24	-2.9	3	4	2	8	93.3	1.11e+16	-275147	-14.56	1.14	149.43	144.38	2.16	0.01	4	119	6.4	228	-10.9	5.24	4.98	2.45	17.53	-4.59	-5.42	3.68	83.6	0	0	1	0
Cysteine	Pure water	Pure methanol	80% B isocratic elution	-0.620194	-1.8	-0.48	3.62	0.11	-0.76	-4.75	1.14	0	-2.8	29.24	-2.5	3	4	2	7	75.3	11100000000000	-453148	-13.45	1	147.18	141.36	2.15	0.01	3.06	108	-15.6	173	-97.6	1.79	4.69	5.27	20.11	-1.25	-3.34	5	64.3	0	0	1	1
Asparagine	Pure water	Pure methanol	80% B isocratic elution	-0.785329	-1.11	-0.37	2.07	0.8	-1.5	-4.65	1.14	0	-4.08	29.24	-3.4	3	4	3	9	134	1.11e+16	-309157	-24.85	1.33	160.84	155.26	2.19	0	3.88	177	14.7	352	34.5	9.05	7.57	3.77	19.29	-6.05	-4.96	6.4	106	0	0	2	0
Lysine	Pure water	Pure methanol	80% B isocratic elution	0.0128111	0.22	-0.75	2.83	0.84	-0.9	-5.87	1.14	0	-3.5	29.24	-3	3	4	5	10	106	1.11e+23	-312026	-21.17	0.86	191.1	191.01	2.28	0	5.99	127	75.3	255	325	8.64	1.15	8.95	18.74	-1	-1.73	0.96	89.3	0	0	2	0
Arginine	Pure water	Pure methanol	80% B isocratic elution	0.0293682	0.87	-1	1.47	0.68	-1.23	-6.53	1.14	0	-3.88	29.24	-4.2	4	4	5	12	176	1.11e+25	-380778	-28.48	1.38	214.93	214.24	2.33	0	9.11	182	56.4	339	241	10.62	3.9	10.66	22.26	-2.7	-2.93	1.97	128	0	0	4	0
Histidine	Pure water	Pure methanol	80% B isocratic elution	0.231545	0.44	-0.59	1.3	0.16	-1.11	-5.44	0.18	0	-3.76	29.24	-3.2	3	4	3	11	151	1.11e+19	-344509	-27.47	0.98	180.91	181.77	2.26	0	5.04	160	36.7	296	139	8.38	4.38	5.7	14.6	-3.9	-4.52	8.26	92	1	1	3	0
Citrulline	Pure water	Pure methanol	80% B isocratic elution	-0.075361	-1	-0.95	1.3	0.42	-1.78	-6.4	1.14	0	-4.13	29.24	-4.3	4	4	5	12	171	1.11e+24	-393268	-29.64	1.53	214.73	215.15	2.33	0	7.6	204	40.5	433	151	12.42	8.36	5.05	24.14	-4.38	-3.03	2.31	118	0	0	3	0
Taurine	Pure water	Pure methanol	80% B isocratic elution	-1.17343	-0.93	-0.46	3.08	0.73	-1.17	-4.11	1.14	0	-3.58	29.24	-4.1	2	4	2	7	120	11100000000000	-476406	-18.56	1.09	143.51	133.49	2.13	0.01	3.57	138	-7.89	285	-71.8	4.16	6.16	-2.47	10.55	-10.36	-3.86	3.47	88.8	0	0	1	1
Tyrosine	Pure water	Pure methanol	80% B isocratic elution	-0.00567592	0.82	-1.01	2.22	-1.06	-1.39	-6.36	-0.01	0	-2.93	29.24	-2.3	3	4	3	13	176	1.11e+23	-395507	-20.45	1.27	210.41	219.03	2.34	0	4.34	158	-11.2	301	-58.2	5.35	7.81	4.18	23.28	-2.58	-2.6	8.84	83.6	0	1	1	0
Hypotaurine	Pure water	Pure methanol	80% B isocratic elution	-0.65411	-0.9	-0.31	3.16	0.67	-1.14	-4.2	1.14	0	-3.55	29.24	-1.5	2	4	2	6	55.5	1110000000000	-429187	-19.14	0.95	136.46	125.99	2.1	0	5.56	129	43.8	272	164	8.05	3.84	8.34	19	-1.9	-2.55	5.19	82.5	0	0	1	1
L-Hydroxyproline	Pure water	Pure methanol	80% B isocratic elution	-0.235733	-0.45	-0.51	2.82	-0.44	-1.36	-4.59	0.18	0	-3.16	29.24	-3.3	3	4	1	9	125	1.11e+17	-299059	-18.75	1.12	155.95	154.27	2.19	0	3.05	140	34.4	301	118	8.1	5.75	7.9	18.5	-1.19	-2.19	3.72	69.6	1	1	1	0
N-omiga-acetylhistamine	Pure water	Pure methanol	80% B isocratic elution	0.853597	1.68	-0.81	2.28	-0.22	-1.21	-6.13	0.18	0	-3.5	29.24	-0.4	2	2	3	11	138	1.11e+21	-321960	-23.57	0.83	195.51	194.44	2.29	0	4.66	148	58.4	320	214	11.2	4.88	6.06	14.64	-2.8	-2.61	4.77	57.8	1	1	3	0
L-pyroglutamicacid	Pure water	Pure methanol	80% B isocratic elution	-0.675709	-1.16	-0.42	2.43	-0.16	-1.19	-4.44	0.18	0	-3.35	29.24	-0.8	2	3	1	9	154	1110000000000000	-298326	-20.95	0.96	151.34	146.44	2.17	0	7.17	137	11.3	267	-26.3	6.36	6.48	3.66	21.17	-4.87	-2.3	6.22	66.4	1	1	1	0
Tyramine	Pure water	Pure methanol	80% B isocratic elution	0.386194	1.17	-0.52	3.22	-0.94	-0.9	-5.8	-0.01	0	-2.52	29.24	1.1	2	2	2	10	87.3	1.11e+20	-277120	-13.98	0.82	183.62	181.83	2.26	0	2.6	106	27.2	227	168	5.88	3.52	8.82	18.57	0.95	-2.63	3.17	46.2	0	1	1	0
Histamine	Pure water	Pure methanol	80% B isocratic elution	0.391623	0.08	-0.57	2.94	-0.2	-1.03	-4.86	0.18	0	-3.16	29.24	-0.7	2	2	2	8	64.7	1.11e+16	-226118	-18.32	0.8	155.19	146.49	2.17	0	4.89	122	68.6	307	360	10.5	2.98	8.7	18.47	-1.26	-2.85	4.92	54.7	1	1	3	0
AaC	Pure water	Pure methanol	80% B isocratic elution	0.943369	1.33	-0.74	2.2	-2.42	-0.49	-6.79	-1.36	0.01	-1.73	29.24	2.6	2	2	0	14	219	1.11e+22	-369670	-14.85	0.86	210.7	216.51	2.34	0	2.51	108	-19	154	-31.5	2.67	3.95	5.78	12.59	0.02	-2.83	2.59	54.7	2	3	3	0
IQx	Pure water	Pure methanol	80% B isocratic elution	1.00313	1.58	-0.92	0.96	-2.02	-0.98	-6.86	-1.36	0	-2.4	29.24	0.6	1	4	0	15	246	1.11e+23	-414479	-25.04	0.93	218.25	227.81	2.36	0.01	8.8	141	56.1	274	235	9.64	3.08	5.71	14.84	-2.23	-2.75	8.88	69.6	2	3	5	0
8-MeIQx	Pure water	Pure methanol	80% B isocratic elution	1.15966	1.54	-1.06	0.92	-2.19	-1	-7.51	-1.36	0	-2.3	29.24	1	1	4	0	16	271	1.11e+26	-439162	-25.13	0.98	237.6	249.06	2.4	0.01	7.72	142	63.8	281	265	10.06	2.97	5.88	15.22	-1.59	-1.95	7.78	69.6	2	3	5	0
MeIQ	Pure water	Pure methanol	80% B isocratic elution	1.26117	1.65	-0.94	1.35	-2.44	-0.72	-7.59	-1.36	0.01	-1.87	29.24	2	1	3	0	16	270	1.11e+27	-429091	-21.18	0.93	236.91	253.92	2.4	0	9.17	124	38.5	216	166	7.22	2.74	7.22	16.13	0.27	-4.33	9.28	56.7	2	3	4	0
IQ[4,5-b]	Pure water	Pure methanol	80% B isocratic elution	0.972973	1.49	-0.99	0.7	-2.13	-0.97	-7.11	-1.36	0	-2.43	29.24	1.7	1	3	0	15	245	1.11e+24	-404413	-27.45	0.9	223.43	232.81	2.37	0	10.84	139	39.2	269	182	8.87	4.02	6.83	16.69	-0.82	-4.58	11	56.7	2	3	4	0
Harman	Pure water	Pure methanol	80% B isocratic elution	1.39651	1.9	-0.43	2.69	-2.49	-0.42	-7	-1.36	0.01	-1.52	29.24	3.6	1	1	0	14	216	1.11e+23	-359587	-12.73	0.59	214.44	223.28	2.35	0	4.55	81.6	10	132	63.3	3.7	2.33	7.72	16.34	1.94	-4.95	4.58	28.7	2	3	2	0
IQ	Pure water	Pure methanol	80% B isocratic elution	1.14537	1.76	-0.85	1.43	-2.34	-0.71	-7.1	-1.36	0	-1.95	29.24	1.5	1	3	0	15	245	1.11e+24	-404413	-20.86	0.92	222.22	233.02	2.37	0	8.83	123	32.7	213	148	6.9	2.78	7	15.75	-0.15	-2.69	8.95	56.7	2	3	4	0
Norharman	Pure water	Pure methanol	80% B isocratic elution	1.19613	1.81	-0.47	2.73	-2.32	-0.47	-6.39	-1.36	0.01	-1.72	29.24	3.2	1	1	0	13	193	1.11e+20	-334905	-13.23	0.56	196.55	201.82	2.3	0	4.61	85.1	3.38	142	46.2	3.74	2.88	7.61	16.32	1.37	-4.84	4.64	28.7	2	3	2	0
DMIP	Pure water	Pure methanol	80% B isocratic elution	1.22273	1.73	-0.83	1.51	-1.12	-1.01	-6.16	-0.59	0	-2.82	29.24	1	1	3	0	12	172	1.11e+21	-332645	-25.27	0.81	195.56	198.01	2.3	0.01	9.99	128	57.4	269	243	9.75	3.19	7.16	17.5	-1.15	-4.24	10.15	56.7	2	2	4	0
Phe-p-1	Pure water	Pure methanol	80% B isocratic elution	1.41797	1.83	-0.46	2.74	-2.2	-0.4	-6.79	-1.16	0.01	-1.66	29.24	2.3	1	2	1	13	152	1.11e+22	-335660	-12.87	0.73	209.56	213.73	2.33	0	3.22	91.3	4.88	123	51	3.16	1.78	7	14.9	1.32	-6	3.7	38.9	1	2	2	0
7,8-DiMeIQx	Pure water	Pure methanol	80% B isocratic elution	1.11519	1.66	-1.17	0.84	-2.35	-1	-8.08	-1.36	0	-2.19	29.24	1.4	1	4	0	17	297	1.11e+29	-463843	-25.35	1.03	254.55	269.67	2.43	0.01	6.62	143	68.9	284	281	10.44	2.87	6.01	15.48	-1.09	-4.51	6.74	69.6	2	3	5	0
Sarcosine	Pure water	Pure methanol	80% B isocratic elution	-0.387363	-0.47	-0.21	4.28	0.6	-0.89	-3.82	1.14	0	-3.06	29.24	-2.8	2	3	2	6	52.8	1110000000000	-203238	-12.38	0.78	127.98	113.01	2.05	0	2.92	94.2	17.5	201	42.4	4.57	4.19	4.37	24.65	-2.74	-4.93	8.22	49.3	0	0	1	0
Creatinine	Pure water	Pure methanol	80% B isocratic elution	0.535589	1.16	-0.34	1.29	0.23	-1.29	-4.4	0.18	0	-3.86	29.24	-1.8	1	1	0	8	151	111000000000000	-248681	-30.05	0.8	143.83	134.46	2.13	0	11.98	146	74.4	333	274	12.86	4.35	5.11	15.98	-5.3	-5.49	12.08	58.7	1	1	3	0
L-dihydrooroticacid	Pure water	Pure methanol	80% B isocratic elution	-1.80473	-1.63	-0.51	1.72	-0.4	-1.39	-4.77	-0.01	0	-3.46	29.24	-1.5	3	4	1	11	225	1.11e+16	-379565	-23.86	1.38	167.39	163.4	2.21	0.01	5.18	172	-17.2	327	-144	5.51	8.7	2.35	17.25	-6.68	-4.92	4.87	95.5	1	1	2	0
L-Carnosine	Pure water	Pure methanol	80% B isocratic elution	0.138534	0.29	-1.29	-0.26	-0.56	-2.03	-7.68	0.18	0	-4.07	29.24	-4	4	5	6	16	259	1.11e+29	-499765	-38.44	1.62	256.29	270.05	2.43	0	12.99	233	51	527	223	14.27	9.82	9.18	20.43	-2.61	-2.2	9.07	121	1	1	4	0
Betaine	Pure water	Pure methanol	80% B isocratic elution	0.606445	1.03	-0.94	-0.47	1.61	-1.81	-4.74	1.14	0	-5.11	29.24	0.5	0	2	1	8	87.6	1.11e+18	-252565	-41.59	0.81	153.39	154.86	2.19	0	15.35	178	181	468	789	21.46	0.08	1.63	14.25	-9.97	-2.66	15.47	40.1	0	0	1	0
Cytosine	Pure water	Pure methanol	80% B isocratic elution	0.471492	0.96	0.16	0.33	-0.33	-1.61	-4.17	-0.01	0	-3.99	29.24	-1.7	2	2	0	8	170	1110000000000	-247927	-34.38	0.87	136.73	126.12	2.1	0	12.89	167	25.9	432	122	12.95	9.67	6.77	18.33	-4	-2.61	13.02	67.5	1	1	3	0
Hypoxanthine	Pure water	Pure methanol	80% B isocratic elution	-0.122246	-0.11	-0.11	1.31	-0.8	-1.27	-4.52	-0.59	0	-3.44	29.24	-0.5	2	3	0	10	190	11100000000000	-305849	-25.27	0.97	150.2	143.93	2.16	0.01	2.51	159	5.76	351	-26.8	8.83	8.14	3.33	11.33	-6.92	-2.86	2.6	70.1	2	2	4	0
Xanthine	Pure water	Pure methanol	80% B isocratic elution	-0.588033	-1.04	-0.29	1.37	-1	-1.25	-4.77	-0.59	0	-3.24	29.24	-0.7	3	3	0	11	217	111000000000000	-353097	-23.72	1.25	159.89	153.96	2.19	0.01	6.06	170	-15.1	367	-128	7.64	10.2	7.74	22.93	-2.99	-2.73	6.1	86.9	2	2	4	0
Guanine	Pure water	Pure methanol	80% B isocratic elution	0.0153469	-0.08	-0.19	0.35	-1.01	-1.59	-4.93	-0.59	0	-3.68	29.24	-1.1	3	3	0	11	225	1110000000000000	-340610	-30.43	1.22	164.42	158.81	2.2	0.01	3.28	191	-7.34	441	-50.1	10.78	11.63	4.81	13.86	-5.99	-2.81	3.34	96.2	2	2	5	0
Adenine	Pure water	Pure methanol	80% B isocratic elution	0.930517	1.05	-0.36	0.65	-1.04	-1.37	-4.68	-0.59	0	-3.36	29.24	-0.1	2	4	0	10	127	111000000000000	-293365	-30.51	0.99	153.88	148.09	2.17	0	11.17	161	9.31	380	47.5	10.2	8.73	5.5	15	-4.52	-2.45	11.33	80.5	2	2	5	0
Cytidine	Pure water	Pure methanol	80% B isocratic elution	-0.467753	-0.64	-1.27	-2.05	-2.05	-1.99	-7.18	-0.97	0	-3.3	29.24	-2.1	4	5	2	17	383	1.11e+29	-559442	-33.42	1.74	241.37	261.47	2.42	0.01	6.86	228	40.6	467	146	13.35	9.24	15.82	45.67	-2.4	-3.46	9.4	129	1	2	3	0
Inosine	Pure water	Pure methanol	80% B isocratic elution	-1.27748	-1.19	-1.42	-1.34	-2.54	-2.03	-7.7	-1.55	0	-3.2	29.24	-1.3	4	7	2	19	405	1.11e+30	-617361	-37.38	1.8	261.27	285.84	2.46	0.01	9.42	243	21.5	459	3.18	11.36	10.23	10.31	29.87	-2.75	-2.08	9.18	129	2	3	4	0
Xanthosine	Pure water	Pure methanol	80% B isocratic elution	-1.15564	-1.03	-1.44	-1.92	-2.45	-1.98	-7.78	-1.55	0	-3.09	29.24	-2.4	5	7	2	20	434	1.11e+31	-664603	-37.75	1.91	265.99	291.82	2.47	0.01	15.45	240	28.5	439	14	11	9.33	12.24	32.43	-2.45	-3.34	12.18	146	2	3	4	0
Guanosine	Pure water	Pure methanol	80% B isocratic elution	-0.873253	-1.24	-1.62	-2.39	-2.86	-2.27	-8.14	-1.55	0	-3.31	29.24	-1.9	5	7	2	20	446	1.11e+32	-652123	-42.64	2.09	276.17	298.73	2.48	0.01	11.43	271	-5.63	543	-85.9	12.26	14.35	13.14	36.02	-2.86	-2.22	11.13	155	2	3	5	0
Uridine	Pure water	Pure methanol	80% B isocratic elution	-1.37511	-0.65	-1.23	-0.25	-1.77	-1.32	-6.97	-0.97	0	-2.77	29.24	-2	4	6	2	17	371	1.11e+28	-571934	-25.98	1.71	235.87	256.94	2.41	0.01	5.57	194	28.6	328	37.3	8.29	6.3	11.64	34.25	-0.98	-1.56	4.28	119	1	2	2	0
Adenosine	Pure water	Pure methanol	80% B isocratic elution	-0.171937	-0.14	-1.38	0.66	-2.7	-1.22	-7.65	-1.55	0	-2.11	29.24	-1.1	4	8	2	19	335	1.11e+31	-604889	-23.66	1.73	253.58	283.19	2.45	0.01	2.18	191	36.3	322	107	8.99	5.54	14.19	39.95	-0.74	-3.53	3.84	140	2	3	5	0
D-Pantothenic acid	Pure water	Pure methanol	95% B isocratic elution	-1.00966	-1.02	-1.33	1.6	-0.46	-1.64	-7.54	1.14	0	-3.45	31.34	-1.1	4	5	6	15	239	1.11e+31	-492236	-26.02	1.56	247.96	269.32	2.43	0	7.46	186	7.26	354	-39.4	8.13	8.95	6.22	23.15	-1.05	-7.18	4.69	107	0	0	1	0
niacinamide	Pure water	Pure methanol	95% B isocratic elution	0.71232	0.63	-0.34	3.02	-0.51	-0.73	-4.8	-0.01	0	-2.89	31.34	-0.4	1	2	1	9	114	111000000000000	-261773	-16.8	0.79	152.74	146.35	2.17	0	2.95	112	27.7	215	95.8	7.01	3.68	5.08	12.91	-3.24	-5.1	4.94	56	1	1	2	0
Pyridoxal	Pure water	Pure methanol	95% B isocratic elution	0.522755	0.76	-0.65	2.47	-1.2	-0.98	-5.81	-0.01	0	-2.51	31.34	0	2	4	2	12	162	1.11e+20	-370806	-16.87	1.08	190.02	193.09	2.29	0.01	3.53	121	8.31	226	-19.7	4.94	5.51	5.04	18.08	-1.4	-2.71	3.58	70.4	1	1	1	0
Pyridoxine	Pure water	Pure methanol	95% B isocratic elution	0.994201	1.51	-0.84	1.77	-1.28	-1.19	-5.97	-0.01	0	-2.78	31.34	-0.8	3	4	2	12	142	1.11e+22	-371565	-22.39	1.06	195.11	198.18	2.3	0	9.44	137	11.5	264	32	6.46	6.06	11.25	32	0.01	-3.22	2.9	73.6	1	1	1	0
Pyridoxamine	Pure water	Pure methanol	95% B isocratic elution	1.01073	1.41	-0.76	2.14	-1.21	-1.22	-6.13	-0.01	0	-2.73	31.34	-1	3	4	2	12	143	1.11e+23	-359090	-19.85	1.23	199.15	205.79	2.31	0.01	2.37	144	49.5	321	233	9.73	4.96	8.51	18.04	-0.23	-3.37	4.35	79.4	1	1	2	0
Thiamine	Pure water	Pure methanol	95% B isocratic elution	0.783507	1.34	0	0	-1.38	-1.18	-9.47	-0.97	0	-3.32	31.34	0	2	6	4	19	269	1.11e+34	-727954	-65.42	1.49	291.55	320.17	2.51	-0.99	0	200	-71.2	335	-70.9	6.56	7.95	14.5	36.27	1.75	-2.99	10.15	104	2	2	4	1
Nicotinicacid	Pure water	Pure methanol	95% B isocratic elution	0.151552	-0.22	-0.27	3.56	-0.87	-0.76	-4.55	-0.01	0	-2.44	31.34	0.4	1	3	1	9	114	11100000000000	-274248	-12.08	0.77	149.15	142	2.15	0	0.88	92.9	1.16	177	-39.1	3.37	4.37	3.73	20.67	-2.73	-2.8	3.67	50.2	1	1	1	0
Alanine	Pure water	Pure methanol	95% B isocratic elution	-0.321346	-0.42	-0.23	3.79	0.58	-0.88	-3.68	1.14	0	-3.12	31.34	-3	2	3	1	6	61.8	1110000000000	-203245	-12.07	0.88	123.86	112.49	2.05	0	1.93	103	20.6	223	81.1	5.25	4.15	6.92	15.51	-0.69	-4.07	2.88	63.3	0	0	1	0
Leucine	Pure water	Pure methanol	95% B isocratic elution	0.252402	0.2	-0.4	3.98	-0.01	-0.77	-5.47	1.14	0	-2.69	31.34	-1.5	2	3	3	9	101	1.11e+21	-277279	-11.49	0.91	176.64	178.51	2.25	0	1.75	97.3	10	188	15.9	4.1	4.03	4.32	23.12	-1.46	-4.42	4.6	63.3	0	0	1	0
Isoleucine	Pure water	Pure methanol	95% B isocratic elution	0.36144	0.18	-0.41	3.99	-0.04	-0.75	-5.42	1.14	0	-2.65	31.34	-1.7	2	3	3	9	103	1.11e+21	-277278	-11.39	0.9	174.76	177.8	2.25	0	1.86	95.2	4.07	178	-13.2	3.66	4.06	5.29	24.73	-0.48	-4.81	8.21	63.3	0	0	1	0
Valine	Pure water	Pure methanol	95% B isocratic elution	0.394137	0	-0.35	3.48	0.83	-0.47	-4.8	1.14	0	-3.14	31.34	-2.3	2	3	2	8	90.4	1.11e+18	-252603	-16.64	0.58	154.87	154.22	2.19	0	7.95	86.9	30.2	126	74.6	3.87	1.16	5.48	13.49	-1.89	-5.23	8.12	63.3	0	0	1	0
Proline	Pure water	Pure methanol	95% B isocratic elution	0.0942051	0.09	-0.33	3.62	-0.57	-0.8	-4.51	0.18	0	-2.65	31.34	-2.5	2	3	1	8	103	1.11e+16	-251835	-13.13	0.77	147.6	142.26	2.15	0	3.61	94.9	18	192	36.7	4.47	4	3.51	21.36	-3.35	-4.13	3.48	49.3	1	1	1	0
Phenylalanine	Pure water	Pure methanol	95% B isocratic elution	0.362029	-0.02	-0.67	2.97	-1	-0.84	-6.26	-0.01	0	-2.59	31.34	-1.5	2	3	3	12	153	1.11e+22	-348280	-15.74	1.01	200.74	208.03	2.32	0	2.66	122	9.49	216	30.8	4.48	4.38	4.16	22.91	-1.94	-2.63	7.78	63.3	0	1	1	0
Methionine	Pure water	Pure methanol	95% B isocratic elution	-0.24816	-0.63	-0.61	3.26	0.03	-0.88	-5.99	1.14	0	-3	31.34	-1.9	2	4	4	9	97	1.11e+19	-502501	-15.83	1.08	186.45	185.96	2.27	0.01	4.25	126	19.1	229	42.1	4.86	4.41	4.94	22.93	-1.51	-3.09	4.05	88.6	0	0	1	1
Tryptophan	Pure water	Pure methanol	95% B isocratic elution	-0.0588459	-0.44	-1.08	1.74	-1.77	-1	-7.3	-0.59	0	-2.57	31.34	-1.1	3	3	3	15	245	1.11e+26	-430876	-21.02	1.24	233.33	250.05	2.4	0	5.34	153	-10.6	271	-20.2	4.73	6.7	4.11	22.25	-1.98	-4.08	5.74	79.1	1	2	2	0
Serine	Pure water	Pure methanol	95% B isocratic elution	-0.361637	-1.23	-0.33	2.82	0.58	-0.92	-3.85	1.14	0	-3.24	31.34	-3.1	3	4	2	7	72.6	11100000000000	-250467	-14.94	1.06	132.32	122.02	2.09	0	3.06	118	4.07	216	-33.2	4.49	4.85	3.58	19.55	-4.08	-3.26	0.99	83.6	0	0	1	0
Glutamine	Pure water	Pure methanol	95% B isocratic elution	-0.646443	-0.96	-0.53	1.53	0.57	-1.38	-5.36	1.14	0	-3.92	31.34	-3.1	3	4	4	10	146	1.11e+19	-333835	-24.89	1.35	180.5	176.05	2.25	0	6.95	174	25	351	64	9.61	7.18	5.6	22.19	-3.61	-5.52	7.53	106	0	0	2	0
Threonine	Pure water	Pure methanol	95% B isocratic elution	-0.241249	-0.8	-0.45	3.49	0.26	-0.94	-4.43	1.14	0	-3	31.34	-2.9	3	4	2	8	93.3	1.11e+16	-275147	-14.56	1.14	149.43	144.38	2.16	0.01	4	119	6.4	228	-10.9	5.24	4.98	2.45	17.53	-4.59	-5.42	3.68	83.6	0	0	1	0
Histidine	Pure water	Pure methanol	95% B isocratic elution	0.198883	0.34	-0.44	1.3	0.21	-1.02	-5.48	0.18	0	-3.85	31.34	-3.2	3	4	3	11	151	1.11e+19	-344509	-27.47	0.98	180.91	181.77	2.26	0	5.04	160	36.7	296	139	8.38	4.38	5.7	14.6	-3.9	-4.52	8.26	92	1	1	3	0
Citrulline	Pure water	Pure methanol	95% B isocratic elution	-0.0930327	-1.42	-0.79	1.3	0.47	-1.66	-6.44	1.14	0	-4.23	31.34	-4.3	4	4	5	12	171	1.11e+24	-393268	-29.64	1.53	214.73	215.15	2.33	0	7.6	204	40.5	433	151	12.42	8.36	5.05	24.14	-4.38	-3.03	2.31	118	0	0	3	0
Taurine	Pure water	Pure methanol	95% B isocratic elution	-1.20635	-0.85	-0.39	3.08	0.72	-1.11	-4.15	1.14	0	-3.63	31.34	-4.1	2	4	2	7	120	11100000000000	-476406	-18.56	1.09	143.51	133.49	2.13	0.01	3.57	138	-7.89	285	-71.8	4.16	6.16	-2.47	10.55	-10.36	-3.86	3.47	88.8	0	0	1	1
Tyrosine	Pure water	Pure methanol	95% B isocratic elution	-0.00747517	0.74	-0.96	2.22	-1.14	-1.31	-6.4	-0.01	0	-2.98	31.34	-2.3	3	4	3	13	176	1.11e+23	-395507	-20.45	1.27	210.41	219.03	2.34	0	4.34	158	-11.2	301	-58.2	5.35	7.81	4.18	23.28	-2.58	-2.6	8.84	83.6	0	1	1	0
Hypotaurine	Pure water	Pure methanol	95% B isocratic elution	-0.684514	-1.04	-0.22	3.16	0.71	-1.06	-4.23	1.14	0	-3.61	31.34	-1.5	2	4	2	6	55.5	1110000000000	-429187	-19.14	0.95	136.46	125.99	2.1	0	5.56	129	43.8	272	164	8.05	3.84	8.34	19	-1.9	-2.55	5.19	82.5	0	0	1	1
L-Hydroxyproline	Pure water	Pure methanol	95% B isocratic elution	-0.248693	-0.55	-0.43	2.82	-0.44	-1.27	-4.62	0.18	0	-3.22	31.34	-3.3	3	4	1	9	125	1.11e+17	-299059	-18.75	1.12	155.95	154.27	2.19	0	3.05	140	34.4	301	118	8.1	5.75	7.9	18.5	-1.19	-2.19	3.72	69.6	1	1	1	0
N-omiga-acetylhistamine	Pure water	Pure methanol	95% B isocratic elution	0.841566	1.66	-0.69	2.28	-0.21	-1.11	-6.17	0.18	0	-3.57	31.34	-0.4	2	2	3	11	138	1.11e+21	-321960	-23.57	0.83	195.51	194.44	2.29	0	4.66	148	58.4	320	214	11.2	4.88	6.06	14.64	-2.8	-2.61	4.77	57.8	1	1	3	0
Tyramine	Pure water	Pure methanol	95% B isocratic elution	0.392439	1.16	-0.53	3.22	-1.06	-0.84	-5.83	-0.01	0	-2.54	31.34	1.1	2	2	2	10	87.3	1.11e+20	-277120	-13.98	0.82	183.62	181.83	2.26	0	2.6	106	27.2	227	168	5.88	3.52	8.82	18.57	0.95	-2.63	3.17	46.2	0	1	1	0
Histamine	Pure water	Pure methanol	95% B isocratic elution	0.369969	-0.06	-0.5	2.94	-0.2	-0.95	-4.89	0.18	0	-3.22	31.34	-0.7	2	2	2	8	64.7	1.11e+16	-226118	-18.32	0.8	155.19	146.49	2.17	0	4.89	122	68.6	307	360	10.5	2.98	8.7	18.47	-1.26	-2.85	4.92	54.7	1	1	3	0
AaC	Pure water	Pure methanol	95% B isocratic elution	0.94375	1.28	-0.76	2.2	-2.6	-0.46	-6.83	-1.36	0.01	-1.75	31.34	2.6	2	2	0	14	219	1.11e+22	-369670	-14.85	0.86	210.7	216.51	2.34	0	2.51	108	-19	154	-31.5	2.67	3.95	5.78	12.59	0.02	-2.83	2.59	54.7	2	3	3	0
IQx	Pure water	Pure methanol	95% B isocratic elution	1.0023	1.51	-0.84	0.96	-2.09	-0.9	-6.9	-1.36	0	-2.46	31.34	0.6	1	4	0	15	246	1.11e+23	-414479	-25.04	0.93	218.25	227.81	2.36	0.01	8.8	141	56.1	274	235	9.64	3.08	5.71	14.84	-2.23	-2.75	8.88	69.6	2	3	5	0
8-MeIQx	Pure water	Pure methanol	95% B isocratic elution	1.1741	1.51	-1	0.92	-2.29	-0.91	-7.55	-1.36	0	-2.35	31.34	1	1	4	0	16	271	1.11e+26	-439162	-25.13	0.98	237.6	249.06	2.4	0.01	7.72	142	63.8	281	265	10.06	2.97	5.88	15.22	-1.59	-1.95	7.78	69.6	2	3	5	0
MeIQ	Pure water	Pure methanol	95% B isocratic elution	1.27533	1.57	-0.93	1.35	-2.6	-0.66	-7.63	-1.36	0.01	-1.9	31.34	2	1	3	0	16	270	1.11e+27	-429091	-21.18	0.93	236.91	253.92	2.4	0	9.17	124	38.5	216	166	7.22	2.74	7.22	16.13	0.27	-4.33	9.28	56.7	2	3	4	0
IQ[4,5-b]	Pure water	Pure methanol	95% B isocratic elution	0.975916	1.44	-0.91	0.7	-2.21	-0.89	-7.15	-1.36	0	-2.49	31.34	1.7	1	3	0	15	245	1.11e+24	-404413	-27.45	0.9	223.43	232.81	2.37	0	10.84	139	39.2	269	182	8.87	4.02	6.83	16.69	-0.82	-4.58	11	56.7	2	3	4	0
Harman	Pure water	Pure methanol	95% B isocratic elution	1.41375	1.81	-0.48	2.69	-2.7	-0.38	-7.04	-1.36	0.01	-1.52	31.34	3.6	1	1	0	14	216	1.11e+23	-359587	-12.73	0.59	214.44	223.28	2.35	0	4.55	81.6	10	132	63.3	3.7	2.33	7.72	16.34	1.94	-4.95	4.58	28.7	2	3	2	0
IQ	Pure water	Pure methanol	95% B isocratic elution	1.15516	1.78	-0.83	1.43	-2.48	-0.65	-7.14	-1.36	0	-1.98	31.34	1.5	1	3	0	15	245	1.11e+24	-404413	-20.86	0.92	222.22	233.02	2.37	0	8.83	123	32.7	213	148	6.9	2.78	7	15.75	-0.15	-2.69	8.95	56.7	2	3	4	0
Norharman	Pure water	Pure methanol	95% B isocratic elution	1.19434	1.74	-0.5	2.73	-2.49	-0.44	-6.43	-1.36	0.01	-1.73	31.34	3.2	1	1	0	13	193	1.11e+20	-334905	-13.23	0.56	196.55	201.82	2.3	0	4.61	85.1	3.38	142	46.2	3.74	2.88	7.61	16.32	1.37	-4.84	4.64	28.7	2	3	2	0
DMIP	Pure water	Pure methanol	95% B isocratic elution	1.21058	1.73	-0.75	1.51	-1.16	-0.93	-6.2	-0.59	0	-2.88	31.34	1	1	3	0	12	172	1.11e+21	-332645	-25.27	0.81	195.56	198.01	2.3	0.01	9.99	128	57.4	269	243	9.75	3.19	7.16	17.5	-1.15	-4.24	10.15	56.7	2	2	4	0
Phe-p-1	Pure water	Pure methanol	95% B isocratic elution	1.42592	1.79	-0.51	2.74	-2.4	-0.37	-6.83	-1.16	0.01	-1.66	31.34	2.3	1	2	1	13	152	1.11e+22	-335660	-12.87	0.73	209.56	213.73	2.33	0	3.22	91.3	4.88	123	51	3.16	1.78	7	14.9	1.32	-6	3.7	38.9	1	2	2	0
7,8-DiMeIQx	Pure water	Pure methanol	95% B isocratic elution	1.12827	1.66	-1.12	0.84	-2.48	-0.92	-8.13	-1.36	0	-2.23	31.34	1.4	1	4	0	17	297	1.11e+29	-463843	-25.35	1.03	254.55	269.67	2.43	0.01	6.62	143	68.9	284	281	10.44	2.87	6.01	15.48	-1.09	-4.51	6.74	69.6	2	3	5	0
Sarcosine	Pure water	Pure methanol	95% B isocratic elution	-0.40812	-0.43	-0.21	4.28	0.56	-0.83	-3.85	1.14	0	-3.08	31.34	-2.8	2	3	2	6	52.8	1110000000000	-203238	-12.38	0.78	127.98	113.01	2.05	0	2.92	94.2	17.5	201	42.4	4.57	4.19	4.37	24.65	-2.74	-4.93	8.22	49.3	0	0	1	0
Creatinine	Pure water	Pure methanol	95% B isocratic elution	0.504278	1.11	-0.16	1.29	0.35	-1.19	-4.42	0.18	0	-3.96	31.34	-1.8	1	1	0	8	151	111000000000000	-248681	-30.05	0.8	143.83	134.46	2.13	0	11.98	146	74.4	333	274	12.86	4.35	5.11	15.98	-5.3	-5.49	12.08	58.7	1	1	3	0
Betaine	Pure water	Pure methanol	95% B isocratic elution	0.558065	1.02	-0.65	-0.47	1.84	-1.67	-4.77	1.14	0	-5.26	31.34	0.5	0	2	1	8	87.6	1.11e+18	-252565	-41.59	0.81	153.39	154.86	2.19	0	15.35	178	181	468	789	21.46	0.08	1.63	14.25	-9.97	-2.66	15.47	40.1	0	0	1	0
Cytosine	Pure water	Pure methanol	95% B isocratic elution	0.434377	0.98	0.37	0.33	-0.18	-1.5	-4.19	-0.01	0	-4.11	31.34	-1.7	2	2	0	8	170	1110000000000	-247927	-34.38	0.87	136.73	126.12	2.1	0	12.89	167	25.9	432	122	12.95	9.67	6.77	18.33	-4	-2.61	13.02	67.5	1	1	3	0
Hypoxanthine	Pure water	Pure methanol	95% B isocratic elution	-0.152558	-0.08	0.05	1.31	-0.71	-1.17	-4.55	-0.59	0	-3.53	31.34	-0.5	2	3	0	10	190	11100000000000	-305849	-25.27	0.97	150.2	143.93	2.16	0.01	2.51	159	5.76	351	-26.8	8.83	8.14	3.33	11.33	-6.92	-2.86	2.6	70.1	2	2	4	0
Xanthine	Pure water	Pure methanol	95% B isocratic elution	-0.618894	-0.98	-0.15	1.37	-0.94	-1.16	-4.8	-0.59	0	-3.33	31.34	-0.7	3	3	0	11	217	111000000000000	-353097	-23.72	1.25	159.89	153.96	2.19	0.01	6.06	170	-15.1	367	-128	7.64	10.2	7.74	22.93	-2.99	-2.73	6.1	86.9	2	2	4	0
Guanine	Pure water	Pure methanol	95% B isocratic elution	-0.0138299	-0.03	0.01	0.35	-0.9	-1.48	-4.96	-0.59	0	-3.79	31.34	-1.1	3	3	0	11	225	1110000000000000	-340610	-30.43	1.22	164.42	158.81	2.2	0.01	3.28	191	-7.34	441	-50.1	10.78	11.63	4.81	13.86	-5.99	-2.81	3.34	96.2	2	2	5	0
Adenine	Pure water	Pure methanol	95% B isocratic elution	0.907145	0.98	-0.19	0.65	-0.96	-1.27	-4.71	-0.59	0	-3.45	31.34	-0.1	2	4	0	10	127	111000000000000	-293365	-30.51	0.99	153.88	148.09	2.17	0	11.17	161	9.31	380	47.5	10.2	8.73	5.5	15	-4.52	-2.45	11.33	80.5	2	2	5	0
Cytidine	Pure water	Pure methanol	95% B isocratic elution	-0.474758	-0.49	-1.09	-2.05	-2.02	-1.86	-7.23	-0.97	0	-3.4	31.34	-2.1	4	5	2	17	383	1.11e+29	-559442	-33.42	1.74	241.37	261.47	2.42	0.01	6.86	228	40.6	467	146	13.35	9.24	15.82	45.67	-2.4	-3.46	9.4	129	1	2	3	0
Inosine	Pure water	Pure methanol	95% B isocratic elution	-1.28787	-1.42	-1.22	-1.34	-2.52	-1.9	-7.76	-1.55	0	-3.31	31.34	-1.3	4	7	2	19	405	1.11e+30	-617361	-37.38	1.8	261.27	285.84	2.46	0.01	9.42	243	21.5	459	3.18	11.36	10.23	10.31	29.87	-2.75	-2.08	9.18	129	2	3	4	0
Xanthosine	Pure water	Pure methanol	95% B isocratic elution	-1.16484	-1.12	-1.26	-1.92	-2.45	-1.85	-7.84	-1.55	0	-3.2	31.34	-2.4	5	7	2	20	434	1.11e+31	-664603	-37.75	1.91	265.99	291.82	2.47	0.01	15.45	240	28.5	439	14	11	9.33	12.24	32.43	-2.45	-3.34	12.18	146	2	3	4	0
Guanosine	Pure water	Pure methanol	95% B isocratic elution	-0.875395	-1.13	-1.39	-2.39	-2.82	-2.12	-8.2	-1.55	0	-3.43	31.34	-1.9	5	7	2	20	446	1.11e+32	-652123	-42.64	2.09	276.17	298.73	2.48	0.01	11.43	271	-5.63	543	-85.9	12.26	14.35	13.14	36.02	-2.86	-2.22	11.13	155	2	3	5	0
Uridine	Pure water	Pure methanol	95% B isocratic elution	-1.38472	-0.97	-1.14	-0.25	-1.84	-1.23	-7.03	-0.97	0	-2.83	31.34	-2	4	6	2	17	371	1.11e+28	-571934	-25.98	1.71	235.87	256.94	2.41	0.01	5.57	194	28.6	328	37.3	8.29	6.3	11.64	34.25	-0.98	-1.56	4.28	119	1	2	2	0
Adenosine	Pure water	Pure methanol	95% B isocratic elution	-0.172799	-0.06	-1.31	0.66	-2.81	-1.13	-7.71	-1.55	0	-2.17	31.34	-1.1	4	8	2	19	335	1.11e+31	-604889	-23.66	1.73	253.58	283.19	2.45	0.01	2.18	191	36.3	322	107	8.99	5.54	14.19	39.95	-0.74	-3.53	3.84	140	2	3	5	0
D-Pantothenic acid	0.1% formic acid water	0.1% formic acid methanol	5% B isocratic elution	-1.18384	-0.73	-0.09	1.6	1.29	-2.7	-6.79	1.14	0	-3.82	18.74	-1.1	4	5	6	15	239	1.11e+31	-492236	-26.02	1.56	247.96	269.32	2.43	0	7.46	186	7.26	354	-39.4	8.13	8.95	6.22	23.15	-1.05	-7.18	4.69	107	0	0	1	0
niacinamide	0.1% formic acid water	0.1% formic acid methanol	5% B isocratic elution	0.779399	0.19	0.26	3.02	0.25	-1.35	-4.4	-0.01	0	-2.98	18.74	-0.4	1	2	1	9	114	111000000000000	-261773	-16.8	0.79	152.74	146.35	2.17	0	2.95	112	27.7	215	95.8	7.01	3.68	5.08	12.91	-3.24	-5.1	4.94	56	1	1	2	0
Pyridoxal	0.1% formic acid water	0.1% formic acid methanol	5% B isocratic elution	0.464401	0.13	0.89	2.47	0.7	-1.63	-5.16	-0.01	0	-3.01	18.74	0	2	4	2	12	162	1.11e+20	-370806	-16.87	1.08	190.02	193.09	2.29	0.01	3.53	121	8.31	226	-19.7	4.94	5.51	5.04	18.08	-1.4	-2.71	3.58	70.4	1	1	1	0
Pyridoxine	0.1% formic acid water	0.1% formic acid methanol	5% B isocratic elution	0.976691	0.7	0.3	1.77	0.21	-1.94	-5.34	-0.01	0	-3.1	18.74	-0.8	3	4	2	12	142	1.11e+22	-371565	-22.39	1.06	195.11	198.18	2.3	0	9.44	137	11.5	264	32	6.46	6.06	11.25	32	0.01	-3.22	2.9	73.6	1	1	1	0
Pyridoxamine	0.1% formic acid water	0.1% formic acid methanol	5% B isocratic elution	0.917232	0.4	0.41	2.14	0.28	-2.06	-5.53	-0.01	0	-3.07	18.74	-1	3	4	2	12	143	1.11e+23	-359090	-19.85	1.23	199.15	205.79	2.31	0.01	2.37	144	49.5	321	233	9.73	4.96	8.51	18.04	-0.23	-3.37	4.35	79.4	1	1	2	0
Thiamine	0.1% formic acid water	0.1% formic acid methanol	5% B isocratic elution	0.257831	0.2	0	0	0.45	-1.95	-8.68	-0.97	0	-3.95	18.74	0	2	6	4	19	269	1.11e+34	-727954	-65.42	1.49	291.55	320.17	2.51	-0.99	0	200	-71.2	335	-70.9	6.56	7.95	14.5	36.27	1.75	-2.99	10.15	104	2	2	4	1
Nicotinicacid	0.1% formic acid water	0.1% formic acid methanol	5% B isocratic elution	0.193934	0.2	1.1	3.56	0.73	-1.23	-4.01	-0.01	0	-2.86	18.74	0.4	1	3	1	9	114	11100000000000	-274248	-12.08	0.77	149.15	142	2.15	0	0.88	92.9	1.16	177	-39.1	3.37	4.37	3.73	20.67	-2.73	-2.8	3.67	50.2	1	1	1	0
Alanine	0.1% formic acid water	0.1% formic acid methanol	5% B isocratic elution	-0.217064	-0.31	0.61	3.79	1.39	-1.45	-3.28	1.14	0	-3.31	18.74	-3	2	3	1	6	61.8	1110000000000	-203245	-12.07	0.88	123.86	112.49	2.05	0	1.93	103	20.6	223	81.1	5.25	4.15	6.92	15.51	-0.69	-4.07	2.88	63.3	0	0	1	0
Leucine	0.1% formic acid water	0.1% formic acid methanol	5% B isocratic elution	0.0594897	0.12	1.54	3.98	2.19	-1.28	-4.98	1.14	0	-3.37	18.74	-1.5	2	3	3	9	101	1.11e+21	-277279	-11.49	0.91	176.64	178.51	2.25	0	1.75	97.3	10	188	15.9	4.1	4.03	4.32	23.12	-1.46	-4.42	4.6	63.3	0	0	1	0
Isoleucine	0.1% formic acid water	0.1% formic acid methanol	5% B isocratic elution	0.175813	0.09	1.53	3.99	2.17	-1.24	-4.93	1.14	0	-3.33	18.74	-1.7	2	3	3	9	103	1.11e+21	-277278	-11.39	0.9	174.76	177.8	2.25	0	1.86	95.2	4.07	178	-13.2	3.66	4.06	5.29	24.73	-0.48	-4.81	8.21	63.3	0	0	1	0
Valine	0.1% formic acid water	0.1% formic acid methanol	5% B isocratic elution	0.43652	-0.03	0.76	3.48	2.07	-0.91	-4.4	1.14	0	-3.45	18.74	-2.3	2	3	2	8	90.4	1.11e+18	-252603	-16.64	0.58	154.87	154.22	2.19	0	7.95	86.9	30.2	126	74.6	3.87	1.16	5.48	13.49	-1.89	-5.23	8.12	63.3	0	0	1	0
Proline	0.1% formic acid water	0.1% formic acid methanol	5% B isocratic elution	0.10093	0.22	0.86	3.62	0.74	-1.34	-4.07	0.18	0	-2.99	18.74	-2.5	2	3	1	8	103	1.11e+16	-251835	-13.13	0.77	147.6	142.26	2.15	0	3.61	94.9	18	192	36.7	4.47	4	3.51	21.36	-3.35	-4.13	3.48	49.3	1	1	1	0
Phenylalanine	0.1% formic acid water	0.1% formic acid methanol	5% B isocratic elution	0.281604	0	0.96	2.97	1.09	-1.37	-5.64	-0.01	0	-3.13	18.74	-1.5	2	3	3	12	153	1.11e+22	-348280	-15.74	1.01	200.74	208.03	2.32	0	2.66	122	9.49	216	30.8	4.48	4.38	4.16	22.91	-1.94	-2.63	7.78	63.3	0	1	1	0
Methionine	0.1% formic acid water	0.1% formic acid methanol	5% B isocratic elution	-0.27591	-0.15	0.86	3.26	1.8	-1.47	-5.39	1.14	0	-3.47	18.74	-1.9	2	4	4	9	97	1.11e+19	-502501	-15.83	1.08	186.45	185.96	2.27	0.01	4.25	126	19.1	229	42.1	4.86	4.41	4.94	22.93	-1.51	-3.09	4.05	88.6	0	0	1	1
Tryptophan	0.1% formic acid water	0.1% formic acid methanol	5% B isocratic elution	-0.168969	-0.39	0.43	1.74	0.45	-1.58	-6.61	-0.59	0	-3.06	18.74	-1.1	3	3	3	15	245	1.11e+26	-430876	-21.02	1.24	233.33	250.05	2.4	0	5.34	153	-10.6	271	-20.2	4.73	6.7	4.11	22.25	-1.98	-4.08	5.74	79.1	1	2	2	0
Serine	0.1% formic acid water	0.1% formic acid methanol	5% B isocratic elution	-0.190484	-0.38	0.37	2.82	1.27	-1.51	-3.4	1.14	0	-3.36	18.74	-3.1	3	4	2	7	72.6	11100000000000	-250467	-14.94	1.06	132.32	122.02	2.09	0	3.06	118	4.07	216	-33.2	4.49	4.85	3.58	19.55	-4.08	-3.26	0.99	83.6	0	0	1	0
Glutamine	0.1% formic acid water	0.1% formic acid methanol	5% B isocratic elution	-0.538619	-0.38	-0.44	1.53	0.79	-2.35	-4.86	1.14	0	-3.79	18.74	-3.1	3	4	4	10	146	1.11e+19	-333835	-24.89	1.35	180.5	176.05	2.25	0	6.95	174	25	351	64	9.61	7.18	5.6	22.19	-3.61	-5.52	7.53	106	0	0	2	0
Threonine	0.1% formic acid water	0.1% formic acid methanol	5% B isocratic elution	-0.209579	-0.31	0.7	3.49	1.49	-1.57	-3.93	1.14	0	-3.33	18.74	-2.9	3	4	2	8	93.3	1.11e+16	-275147	-14.56	1.14	149.43	144.38	2.16	0.01	4	119	6.4	228	-10.9	5.24	4.98	2.45	17.53	-4.59	-5.42	3.68	83.6	0	0	1	0
Cysteine	0.1% formic acid water	0.1% formic acid methanol	5% B isocratic elution	-0.534244	-0.57	0.72	3.62	1.43	-1.14	-4.26	1.14	0	-3.18	18.74	-2.5	3	4	2	7	75.3	11100000000000	-453148	-13.45	1	147.18	141.36	2.15	0.01	3.06	108	-15.6	173	-97.6	1.79	4.69	5.27	20.11	-1.25	-3.34	5	64.3	0	0	1	1
Asparagine	0.1% formic acid water	0.1% formic acid methanol	5% B isocratic elution	-0.579274	-0.45	-0.64	2.07	0.53	-2.37	-4.22	1.14	0	-3.81	18.74	-3.4	3	4	3	9	134	1.11e+16	-309157	-24.85	1.33	160.84	155.26	2.19	0	3.88	177	14.7	352	34.5	9.05	7.57	3.77	19.29	-6.05	-4.96	6.4	106	0	0	2	0
Glutamicacid	0.1% formic acid water	0.1% formic acid methanol	5% B isocratic elution	-0.503057	-0.38	-0.26	2.12	1.3	-1.8	-4.49	1.14	0	-3.84	18.74	-3.7	3	5	4	10	145	1.11e+18	-346311	-25.1	1.06	172.73	167.41	2.22	0	8.05	150	9.3	247	-26.7	4.8	5.32	4.16	20.54	-4.48	-4.16	4.84	101	0	0	1	1
Lysine	0.1% formic acid water	0.1% formic acid methanol	5% B isocratic elution	-0.0257764	-0.41	0.19	2.83	1.88	-1.54	-5.45	1.14	0	-3.76	18.74	-3	3	4	5	10	106	1.11e+23	-312026	-21.17	0.86	191.1	191.01	2.28	0	5.99	127	75.3	255	325	8.64	1.15	8.95	18.74	-1	-1.73	0.96	89.3	0	0	2	0
Arginine	0.1% formic acid water	0.1% formic acid methanol	5% B isocratic elution	0.0511446	-0.13	-0.69	1.47	1.06	-2.13	-6.08	1.14	0	-3.87	18.74	-4.2	4	4	5	12	176	1.11e+25	-380778	-28.48	1.38	214.93	214.24	2.33	0	9.11	182	56.4	339	241	10.62	3.9	10.66	22.26	-2.7	-2.93	1.97	128	0	0	4	0
Histidine	0.1% formic acid water	0.1% formic acid methanol	5% B isocratic elution	0.422209	-0.16	-0.71	1.3	0.22	-1.84	-4.99	0.18	0	-3.56	18.74	-3.2	3	4	3	11	151	1.11e+19	-344509	-27.47	0.98	180.91	181.77	2.26	0	5.04	160	36.7	296	139	8.38	4.38	5.7	14.6	-3.9	-4.52	8.26	92	1	1	3	0
Citrulline	0.1% formic acid water	0.1% formic acid methanol	5% B isocratic elution	-0.0526229	-0.51	-0.79	1.3	0.74	-2.82	-5.87	1.14	0	-4.05	18.74	-4.3	4	4	5	12	171	1.11e+24	-393268	-29.64	1.53	214.73	215.15	2.33	0	7.6	204	40.5	433	151	12.42	8.36	5.05	24.14	-4.38	-3.03	2.31	118	0	0	3	0
Taurine	0.1% formic acid water	0.1% formic acid methanol	5% B isocratic elution	-0.953422	-0.84	-0.08	3.08	1.15	-1.73	-3.64	1.14	0	-3.6	18.74	-4.1	2	4	2	7	120	11100000000000	-476406	-18.56	1.09	143.51	133.49	2.13	0.01	3.57	138	-7.89	285	-71.8	4.16	6.16	-2.47	10.55	-10.36	-3.86	3.47	88.8	0	0	1	1
Tyrosine	0.1% formic acid water	0.1% formic acid methanol	5% B isocratic elution	-0.0241388	0.03	0.16	2.22	0.47	-2.06	-5.71	-0.01	0	-3.3	18.74	-2.3	3	4	3	13	176	1.11e+23	-395507	-20.45	1.27	210.41	219.03	2.34	0	4.34	158	-11.2	301	-58.2	5.35	7.81	4.18	23.28	-2.58	-2.6	8.84	83.6	0	1	1	0
Hypotaurine	0.1% formic acid water	0.1% formic acid methanol	5% B isocratic elution	-0.456682	-0.53	-0.13	3.16	0.77	-1.82	-3.8	1.14	0	-3.47	18.74	-1.5	2	4	2	6	55.5	1110000000000	-429187	-19.14	0.95	136.46	125.99	2.1	0	5.56	129	43.8	272	164	8.05	3.84	8.34	19	-1.9	-2.55	5.19	82.5	0	0	1	1
L-Hydroxyproline	0.1% formic acid water	0.1% formic acid methanol	5% B isocratic elution	-0.138729	-0.16	-0.01	2.82	0.08	-2.1	-4.12	0.18	0	-3.23	18.74	-3.3	3	4	1	9	125	1.11e+17	-299059	-18.75	1.12	155.95	154.27	2.19	0	3.05	140	34.4	301	118	8.1	5.75	7.9	18.5	-1.19	-2.19	3.72	69.6	1	1	1	0
N-omiga-acetylhistamine	0.1% formic acid water	0.1% formic acid methanol	5% B isocratic elution	0.852035	0.78	-0.37	2.28	0.45	-1.97	-5.69	0.18	0	-3.54	18.74	-0.4	2	2	3	11	138	1.11e+21	-321960	-23.57	0.83	195.51	194.44	2.29	0	4.66	148	58.4	320	214	11.2	4.88	6.06	14.64	-2.8	-2.61	4.77	57.8	1	1	3	0
L-pyroglutamicacid	0.1% formic acid water	0.1% formic acid methanol	5% B isocratic elution	-0.49206	-0.65	-0.15	2.43	0.17	-1.85	-3.98	0.18	0	-3.31	18.74	-0.8	2	3	1	9	154	1110000000000000	-298326	-20.95	0.96	151.34	146.44	2.17	0	7.17	137	11.3	267	-26.3	6.36	6.48	3.66	21.17	-4.87	-2.3	6.22	66.4	1	1	1	0
Tyramine	0.1% formic acid water	0.1% formic acid methanol	5% B isocratic elution	0.276541	-0.14	1.07	3.22	0.89	-1.34	-5.33	-0.01	0	-3.06	18.74	1.1	2	2	2	10	87.3	1.11e+20	-277120	-13.98	0.82	183.62	181.83	2.26	0	2.6	106	27.2	227	168	5.88	3.52	8.82	18.57	0.95	-2.63	3.17	46.2	0	1	1	0
Histamine	0.1% formic acid water	0.1% formic acid methanol	5% B isocratic elution	0.420478	0.57	-0.07	2.94	0.39	-1.64	-4.52	0.18	0	-3.23	18.74	-0.7	2	2	2	8	64.7	1.11e+16	-226118	-18.32	0.8	155.19	146.49	2.17	0	4.89	122	68.6	307	360	10.5	2.98	8.7	18.47	-1.26	-2.85	4.92	54.7	1	1	3	0
IQx	0.1% formic acid water	0.1% formic acid methanol	5% B isocratic elution	0.912671	0.35	0.06	0.96	-0.6	-1.65	-6.32	-1.36	0	-2.68	18.74	0.6	1	4	0	15	246	1.11e+23	-414479	-25.04	0.93	218.25	227.81	2.36	0.01	8.8	141	56.1	274	235	9.64	3.08	5.71	14.84	-2.23	-2.75	8.88	69.6	2	3	5	0
8-MeIQx	0.1% formic acid water	0.1% formic acid methanol	5% B isocratic elution	0.985677	-1.32	0.25	0.92	-0.37	-1.68	-6.93	-1.36	0	-2.72	18.74	1	1	4	0	16	271	1.11e+26	-439162	-25.13	0.98	237.6	249.06	2.4	0.01	7.72	142	63.8	281	265	10.06	2.97	5.88	15.22	-1.59	-1.95	7.78	69.6	2	3	5	0
MeIQ	0.1% formic acid water	0.1% formic acid methanol	5% B isocratic elution	0.927753	0.64	0.84	1.35	-0.15	-1.26	-7.01	-1.36	0	-2.5	18.74	2	1	3	0	16	270	1.11e+27	-429091	-21.18	0.93	236.91	253.92	2.4	0	9.17	124	38.5	216	166	7.22	2.74	7.22	16.13	0.27	-4.33	9.28	56.7	2	3	4	0
IQ	0.1% formic acid water	0.1% formic acid methanol	5% B isocratic elution	0.994144	0.81	0.7	1.43	-0.34	-1.23	-6.55	-1.36	0	-2.47	18.74	1.5	1	3	0	15	245	1.11e+24	-404413	-20.86	0.92	222.22	233.02	2.37	0	8.83	123	32.7	213	148	6.9	2.78	7	15.75	-0.15	-2.69	8.95	56.7	2	3	4	0
DMIP	0.1% formic acid water	0.1% formic acid methanol	5% B isocratic elution	1.16893	0.83	-0.01	1.51	0.03	-1.64	-5.7	-0.59	0	-3.03	18.74	1	1	3	0	12	172	1.11e+21	-332645	-25.27	0.81	195.56	198.01	2.3	0.01	9.99	128	57.4	269	243	9.75	3.19	7.16	17.5	-1.15	-4.24	10.15	56.7	2	2	4	0
Sarcosine	0.1% formic acid water	0.1% formic acid methanol	5% B isocratic elution	-0.301656	-0.3	0.78	4.28	1.53	-1.36	-3.42	1.14	0	-3.34	18.74	-2.8	2	3	2	6	52.8	1110000000000	-203238	-12.38	0.78	127.98	113.01	2.05	0	2.92	94.2	17.5	201	42.4	4.57	4.19	4.37	24.65	-2.74	-4.93	8.22	49.3	0	0	1	0
Creatinine	0.1% formic acid water	0.1% formic acid methanol	5% B isocratic elution	0.740382	0.26	-0.93	1.29	-0.34	-2.09	-4.1	0.18	0	-3.46	18.74	-1.8	1	1	0	8	151	111000000000000	-248681	-30.05	0.8	143.83	134.46	2.13	0	11.98	146	74.4	333	274	12.86	4.35	5.11	15.98	-5.3	-5.49	12.08	58.7	1	1	3	0
L-dihydrooroticacid	0.1% formic acid water	0.1% formic acid methanol	5% B isocratic elution	-1.55505	-1.44	-0.45	1.72	-0.25	-2.16	-4.21	-0.01	0	-3.34	18.74	-1.5	3	4	1	11	225	1.11e+16	-379565	-23.86	1.38	167.39	163.4	2.21	0.01	5.18	172	-17.2	327	-144	5.51	8.7	2.35	17.25	-6.68	-4.92	4.87	95.5	1	1	2	0
L-Carnosine	0.1% formic acid water	0.1% formic acid methanol	5% B isocratic elution	0.17329	-0.8	-1.25	-0.26	-0.1	-3.18	-6.99	0.18	0	-3.94	18.74	-4	4	5	6	16	259	1.11e+29	-499765	-38.44	1.62	256.29	270.05	2.43	0	12.99	233	51	527	223	14.27	9.82	9.18	20.43	-2.61	-2.2	9.07	121	1	1	4	0
Betaine	0.1% formic acid water	0.1% formic acid methanol	5% B isocratic elution	0.918014	0.49	-2.42	-0.47	0.28	-2.8	-4.41	1.14	0	-4.33	18.74	0.5	0	2	1	8	87.6	1.11e+18	-252565	-41.59	0.81	153.39	154.86	2.19	0	15.35	178	181	468	789	21.46	0.08	1.63	14.25	-9.97	-2.66	15.47	40.1	0	0	1	0
Cytosine	0.1% formic acid water	0.1% formic acid methanol	5% B isocratic elution	0.683825	0.3	-0.82	0.33	-1.14	-2.46	-3.89	-0.01	0	-3.41	18.74	-1.7	2	2	0	8	170	1110000000000	-247927	-34.38	0.87	136.73	126.12	2.1	0	12.89	167	25.9	432	122	12.95	9.67	6.77	18.33	-4	-2.61	13.02	67.5	1	1	3	0
Hypoxanthine	0.1% formic acid water	0.1% formic acid methanol	5% B isocratic elution	0.0906399	0	-0.65	1.31	-1.16	-2.05	-4.14	-0.59	0	-3.06	18.74	-0.5	2	3	0	10	190	11100000000000	-305849	-25.27	0.97	150.2	143.93	2.16	0.01	2.51	159	5.76	351	-26.8	8.83	8.14	3.33	11.33	-6.92	-2.86	2.6	70.1	2	2	4	0
Xanthine	0.1% formic acid water	0.1% formic acid methanol	5% B isocratic elution	-0.43363	-0.4	-0.53	1.37	-1.1	-2.05	-4.37	-0.59	0	-2.99	18.74	-0.7	3	3	0	11	217	111000000000000	-353097	-23.72	1.25	159.89	153.96	2.19	0.01	6.06	170	-15.1	367	-128	7.64	10.2	7.74	22.93	-2.99	-2.73	6.1	86.9	2	2	4	0
Guanine	0.1% formic acid water	0.1% formic acid methanol	5% B isocratic elution	0.20088	0.01	-1.02	0.35	-1.62	-2.52	-4.56	-0.59	0	-3.17	18.74	-1.1	3	3	0	11	225	1110000000000000	-340610	-30.43	1.22	164.42	158.81	2.2	0.01	3.28	191	-7.34	441	-50.1	10.78	11.63	4.81	13.86	-5.99	-2.81	3.34	96.2	2	2	5	0
Adenine	0.1% formic acid water	0.1% formic acid methanol	5% B isocratic elution	1.06539	0.55	-0.84	0.65	-1.29	-2.17	-4.34	-0.59	0	-3	18.74	-0.1	2	4	0	10	127	111000000000000	-293365	-30.51	0.99	153.88	148.09	2.17	0	11.17	161	9.31	380	47.5	10.2	8.73	5.5	15	-4.52	-2.45	11.33	80.5	2	2	5	0
Beta-Thymidine	0.1% formic acid water	0.1% formic acid methanol	5% B isocratic elution	-1.25844	-1.73	-0.03	1.16	-0.31	-2.17	-6.79	-0.97	0	-3.05	18.74	-1.2	3	5	2	17	381	1.11e+30	-549390	-24.52	1.42	246.36	266.66	2.43	0.01	4.01	176	50.1	310	96.6	9.28	5.39	15.53	45.1	-0.93	-3.96	6.43	99.1	1	2	2	0
Cytidine	0.1% formic acid water	0.1% formic acid methanol	5% B isocratic elution	-0.462224	-0.73	-1.13	-2.05	-1.54	-3.15	-6.51	-0.97	0	-3.21	18.74	-2.1	4	5	2	17	383	1.11e+29	-559442	-33.42	1.74	241.37	261.47	2.42	0.01	6.86	228	40.6	467	146	13.35	9.24	15.82	45.67	-2.4	-3.46	9.4	129	1	2	3	0
Inosine	0.1% formic acid water	0.1% formic acid methanol	5% B isocratic elution	-1.25476	-1.24	-1.35	-1.34	-1.98	-3.26	-6.93	-1.55	0	-3.09	18.74	-1.3	4	7	2	19	405	1.11e+30	-617361	-37.38	1.8	261.27	285.84	2.46	0.01	9.42	243	21.5	459	3.18	11.36	10.23	10.31	29.87	-2.75	-2.08	9.18	129	2	3	4	0
Xanthosine	0.1% formic acid water	0.1% formic acid methanol	5% B isocratic elution	-1.12062	-1.17	-1.16	-1.92	-1.7	-3.18	-6.96	-1.55	0	-3.07	18.74	-2.4	5	7	2	20	434	1.11e+31	-664603	-37.75	1.91	265.99	291.82	2.47	0.01	15.45	240	28.5	439	14	11	9.33	12.24	32.43	-2.45	-3.34	12.18	146	2	3	4	0
Guanosine	0.1% formic acid water	0.1% formic acid methanol	5% B isocratic elution	-0.881836	-0.65	-1.67	-2.39	-2.33	-3.56	-7.37	-1.55	0	-3.14	18.74	-1.9	5	7	2	20	446	1.11e+32	-652123	-42.64	2.09	276.17	298.73	2.48	0.01	11.43	271	-5.63	543	-85.9	12.26	14.35	13.14	36.02	-2.86	-2.22	11.13	155	2	3	5	0
Uridine	0.1% formic acid water	0.1% formic acid methanol	5% B isocratic elution	-1.37625	-1.79	-0.27	-0.25	-0.45	-2.21	-6.23	-0.97	0	-3.04	18.74	-2	4	6	2	17	371	1.11e+28	-571934	-25.98	1.71	235.87	256.94	2.41	0.01	5.57	194	28.6	328	37.3	8.29	6.3	11.64	34.25	-0.98	-1.56	4.28	119	1	2	2	0
Adenosine	0.1% formic acid water	0.1% formic acid methanol	5% B isocratic elution	-0.361542	0.05	-0.07	0.66	-0.9	-2.1	-6.97	-1.55	0	-2.53	18.74	-1.1	4	8	2	19	335	1.11e+31	-604889	-23.66	1.73	253.58	283.19	2.45	0.01	2.18	191	36.3	322	107	8.99	5.54	14.19	39.95	-0.74	-3.53	3.84	140	2	3	5	0
D-Pantothenic acid	0.1% formic acid water	0.1% formic acid methanol	20% B isocratic elution	-1.12746	-0.73	-0.98	1.6	0.55	-2.4	-7.07	1.14	0	-3.46	20.84	-1.1	4	5	6	15	239	1.11e+31	-492236	-26.02	1.56	247.96	269.32	2.43	0	7.46	186	7.26	354	-39.4	8.13	8.95	6.22	23.15	-1.05	-7.18	4.69	107	0	0	1	0
niacinamide	0.1% formic acid water	0.1% formic acid methanol	20% B isocratic elution	0.783381	0.25	-0.22	3.02	-0.1	-1.18	-4.54	-0.01	0	-2.8	20.84	-0.4	1	2	1	9	114	111000000000000	-261773	-16.8	0.79	152.74	146.35	2.17	0	2.95	112	27.7	215	95.8	7.01	3.68	5.08	12.91	-3.24	-5.1	4.94	56	1	1	2	0
Pyridoxal	0.1% formic acid water	0.1% formic acid methanol	20% B isocratic elution	0.485618	0.26	0.03	2.47	-0.03	-1.45	-5.4	-0.01	0	-2.67	20.84	0	2	4	2	12	162	1.11e+20	-370806	-16.87	1.08	190.02	193.09	2.29	0.01	3.53	121	8.31	226	-19.7	4.94	5.51	5.04	18.08	-1.4	-2.71	3.58	70.4	1	1	1	0
Pyridoxine	0.1% formic acid water	0.1% formic acid methanol	20% B isocratic elution	0.986822	0.76	-0.43	1.77	-0.39	-1.73	-5.57	-0.01	0	-2.82	20.84	-0.8	3	4	2	12	142	1.11e+22	-371565	-22.39	1.06	195.11	198.18	2.3	0	9.44	137	11.5	264	32	6.46	6.06	11.25	32	0.01	-3.22	2.9	73.6	1	1	1	0
Pyridoxamine	0.1% formic acid water	0.1% formic acid methanol	20% B isocratic elution	0.94919	0.45	-0.35	2.14	-0.34	-1.84	-5.75	-0.01	0	-2.77	20.84	-1	3	4	2	12	143	1.11e+23	-359090	-19.85	1.23	199.15	205.79	2.31	0.01	2.37	144	49.5	321	233	9.73	4.96	8.51	18.04	-0.23	-3.37	4.35	79.4	1	1	2	0
Thiamine	0.1% formic acid water	0.1% formic acid methanol	20% B isocratic elution	0.572148	0.27	0	0	-0.23	-1.73	-8.96	-0.97	0	-3.5	20.84	0	2	6	4	19	269	1.11e+34	-727954	-65.42	1.49	291.55	320.17	2.51	-0.99	0	200	-71.2	335	-70.9	6.56	7.95	14.5	36.27	1.75	-2.99	10.15	104	2	2	4	1
Nicotinicacid	0.1% formic acid water	0.1% formic acid methanol	20% B isocratic elution	0.191243	0.25	0.38	3.56	0.11	-1.11	-4.21	-0.01	0	-2.58	20.84	0.4	1	3	1	9	114	11100000000000	-274248	-12.08	0.77	149.15	142	2.15	0	0.88	92.9	1.16	177	-39.1	3.37	4.37	3.73	20.67	-2.73	-2.8	3.67	50.2	1	1	1	0
Alanine	0.1% formic acid water	0.1% formic acid methanol	20% B isocratic elution	-0.22511	-0.21	0.1	3.79	1.03	-1.3	-3.42	1.14	0	-3.12	20.84	-3	2	3	1	6	61.8	1110000000000	-203245	-12.07	0.88	123.86	112.49	2.05	0	1.93	103	20.6	223	81.1	5.25	4.15	6.92	15.51	-0.69	-4.07	2.88	63.3	0	0	1	0
Leucine	0.1% formic acid water	0.1% formic acid methanol	20% B isocratic elution	0.140869	0.23	0.58	3.98	1.36	-1.14	-5.16	1.14	0	-2.98	20.84	-1.5	2	3	3	9	101	1.11e+21	-277279	-11.49	0.91	176.64	178.51	2.25	0	1.75	97.3	10	188	15.9	4.1	4.03	4.32	23.12	-1.46	-4.42	4.6	63.3	0	0	1	0
Isoleucine	0.1% formic acid water	0.1% formic acid methanol	20% B isocratic elution	0.255599	0.2	0.58	3.99	1.34	-1.1	-5.11	1.14	0	-2.95	20.84	-1.7	2	3	3	9	103	1.11e+21	-277278	-11.39	0.9	174.76	177.8	2.25	0	1.86	95.2	4.07	178	-13.2	3.66	4.06	5.29	24.73	-0.48	-4.81	8.21	63.3	0	0	1	0
Valine	0.1% formic acid water	0.1% formic acid methanol	20% B isocratic elution	0.440164	0.1	0.11	3.48	1.57	-0.79	-4.55	1.14	0	-3.2	20.84	-2.3	2	3	2	8	90.4	1.11e+18	-252603	-16.64	0.58	154.87	154.22	2.19	0	7.95	86.9	30.2	126	74.6	3.87	1.16	5.48	13.49	-1.89	-5.23	8.12	63.3	0	0	1	0
Proline	0.1% formic acid water	0.1% formic acid methanol	20% B isocratic elution	0.113624	0.3	0.19	3.62	0.22	-1.19	-4.23	0.18	0	-2.74	20.84	-2.5	2	3	1	8	103	1.11e+16	-251835	-13.13	0.77	147.6	142.26	2.15	0	3.61	94.9	18	192	36.7	4.47	4	3.51	21.36	-3.35	-4.13	3.48	49.3	1	1	1	0
Phenylalanine	0.1% formic acid water	0.1% formic acid methanol	20% B isocratic elution	0.311286	0.12	0.05	2.97	0.3	-1.22	-5.87	-0.01	0	-2.77	20.84	-1.5	2	3	3	12	153	1.11e+22	-348280	-15.74	1.01	200.74	208.03	2.32	0	2.66	122	9.49	216	30.8	4.48	4.38	4.16	22.91	-1.94	-2.63	7.78	63.3	0	1	1	0
Methionine	0.1% formic acid water	0.1% formic acid methanol	20% B isocratic elution	-0.258449	-0.03	0.04	3.26	1.12	-1.3	-5.61	1.14	0	-3.15	20.84	-1.9	2	4	4	9	97	1.11e+19	-502501	-15.83	1.08	186.45	185.96	2.27	0.01	4.25	126	19.1	229	42.1	4.86	4.41	4.94	22.93	-1.51	-3.09	4.05	88.6	0	0	1	1
Tryptophan	0.1% formic acid water	0.1% formic acid methanol	20% B isocratic elution	-0.133957	-0.27	-0.5	1.74	-0.39	-1.42	-6.86	-0.59	0	-2.69	20.84	-1.1	3	3	3	15	245	1.11e+26	-430876	-21.02	1.24	233.33	250.05	2.4	0	5.34	153	-10.6	271	-20.2	4.73	6.7	4.11	22.25	-1.98	-4.08	5.74	79.1	1	2	2	0
Serine	0.1% formic acid water	0.1% formic acid methanol	20% B isocratic elution	-0.231154	-0.31	-0.1	2.82	0.95	-1.35	-3.57	1.14	0	-3.19	20.84	-3.1	3	4	2	7	72.6	11100000000000	-250467	-14.94	1.06	132.32	122.02	2.09	0	3.06	118	4.07	216	-33.2	4.49	4.85	3.58	19.55	-4.08	-3.26	0.99	83.6	0	0	1	0
Glutamine	0.1% formic acid water	0.1% formic acid methanol	20% B isocratic elution	-0.553875	-0.33	-0.83	1.53	0.57	-2.08	-5.04	1.14	0	-3.65	20.84	-3.1	3	4	4	10	146	1.11e+19	-333835	-24.89	1.35	180.5	176.05	2.25	0	6.95	174	25	351	64	9.61	7.18	5.6	22.19	-3.61	-5.52	7.53	106	0	0	2	0
Threonine	0.1% formic acid water	0.1% formic acid methanol	20% B isocratic elution	-0.198986	-0.22	0.05	3.49	0.99	-1.39	-4.11	1.14	0	-3.08	20.84	-2.9	3	4	2	8	93.3	1.11e+16	-275147	-14.56	1.14	149.43	144.38	2.16	0.01	4	119	6.4	228	-10.9	5.24	4.98	2.45	17.53	-4.59	-5.42	3.68	83.6	0	0	1	0
Cysteine	0.1% formic acid water	0.1% formic acid methanol	20% B isocratic elution	-0.554244	-0.48	0.07	3.62	0.9	-1.02	-4.45	1.14	0	-2.93	20.84	-2.5	3	4	2	7	75.3	11100000000000	-453148	-13.45	1	147.18	141.36	2.15	0.01	3.06	108	-15.6	173	-97.6	1.79	4.69	5.27	20.11	-1.25	-3.34	5	64.3	0	0	1	1
Asparagine	0.1% formic acid water	0.1% formic acid methanol	20% B isocratic elution	-0.646233	-0.39	-0.83	2.07	0.51	-2.11	-4.39	1.14	0	-3.76	20.84	-3.4	3	4	3	9	134	1.11e+16	-309157	-24.85	1.33	160.84	155.26	2.19	0	3.88	177	14.7	352	34.5	9.05	7.57	3.77	19.29	-6.05	-4.96	6.4	106	0	0	2	0
Glutamicacid	0.1% formic acid water	0.1% formic acid methanol	20% B isocratic elution	-0.573116	-0.29	-0.66	2.12	1.07	-1.59	-4.69	1.14	0	-3.71	20.84	-3.7	3	5	4	10	145	1.11e+18	-346311	-25.1	1.06	172.73	167.41	2.22	0	8.05	150	9.3	247	-26.7	4.8	5.32	4.16	20.54	-4.48	-4.16	4.84	101	0	0	1	1
Lysine	0.1% formic acid water	0.1% formic acid methanol	20% B isocratic elution	0.000280012	-0.3	-0.46	2.83	1.4	-1.35	-5.61	1.14	0	-3.51	20.84	-3	3	4	5	10	106	1.11e+23	-312026	-21.17	0.86	191.1	191.01	2.28	0	5.99	127	75.3	255	325	8.64	1.15	8.95	18.74	-1	-1.73	0.96	89.3	0	0	2	0
Arginine	0.1% formic acid water	0.1% formic acid methanol	20% B isocratic elution	0.0411093	-0.01	-1.16	1.47	0.82	-1.86	-6.25	1.14	0	-3.7	20.84	-4.2	4	4	5	12	176	1.11e+25	-380778	-28.48	1.38	214.93	214.24	2.33	0	9.11	182	56.4	339	241	10.62	3.9	10.66	22.26	-2.7	-2.93	1.97	128	0	0	4	0
Histidine	0.1% formic acid water	0.1% formic acid methanol	20% B isocratic elution	0.368323	-0.06	-0.98	1.3	0.09	-1.62	-5.16	0.18	0	-3.47	20.84	-3.2	3	4	3	11	151	1.11e+19	-344509	-27.47	0.98	180.91	181.77	2.26	0	5.04	160	36.7	296	139	8.38	4.38	5.7	14.6	-3.9	-4.52	8.26	92	1	1	3	0
Citrulline	0.1% formic acid water	0.1% formic acid methanol	20% B isocratic elution	-0.0592409	-0.44	-1.23	1.3	0.48	-2.51	-6.07	1.14	0	-3.9	20.84	-4.3	4	4	5	12	171	1.11e+24	-393268	-29.64	1.53	214.73	215.15	2.33	0	7.6	204	40.5	433	151	12.42	8.36	5.05	24.14	-4.38	-3.03	2.31	118	0	0	3	0
Taurine	0.1% formic acid water	0.1% formic acid methanol	20% B isocratic elution	-1.01861	-0.83	-0.45	3.08	0.92	-1.56	-3.82	1.14	0	-3.47	20.84	-4.1	2	4	2	7	120	11100000000000	-476406	-18.56	1.09	143.51	133.49	2.13	0.01	3.57	138	-7.89	285	-71.8	4.16	6.16	-2.47	10.55	-10.36	-3.86	3.47	88.8	0	0	1	1
Tyrosine	0.1% formic acid water	0.1% formic acid methanol	20% B isocratic elution	-0.0157809	0.08	-0.61	2.22	-0.18	-1.85	-5.96	-0.01	0	-3	20.84	-2.3	3	4	3	13	176	1.11e+23	-395507	-20.45	1.27	210.41	219.03	2.34	0	4.34	158	-11.2	301	-58.2	5.35	7.81	4.18	23.28	-2.58	-2.6	8.84	83.6	0	1	1	0
Hypotaurine	0.1% formic acid water	0.1% formic acid methanol	20% B isocratic elution	-0.508725	-0.47	-0.42	3.16	0.65	-1.61	-3.95	1.14	0	-3.38	20.84	-1.5	2	4	2	6	55.5	1110000000000	-429187	-19.14	0.95	136.46	125.99	2.1	0	5.56	129	43.8	272	164	8.05	3.84	8.34	19	-1.9	-2.55	5.19	82.5	0	0	1	1
L-Hydroxyproline	0.1% formic acid water	0.1% formic acid methanol	20% B isocratic elution	-0.16094	-0.08	-0.46	2.82	-0.22	-1.88	-4.3	0.18	0	-3.07	20.84	-3.3	3	4	1	9	125	1.11e+17	-299059	-18.75	1.12	155.95	154.27	2.19	0	3.05	140	34.4	301	118	8.1	5.75	7.9	18.5	-1.19	-2.19	3.72	69.6	1	1	1	0
N-omiga-acetylhistamine	0.1% formic acid water	0.1% formic acid methanol	20% B isocratic elution	0.862416	0.79	-0.87	2.28	0.07	-1.75	-5.86	0.18	0	-3.36	20.84	-0.4	2	2	3	11	138	1.11e+21	-321960	-23.57	0.83	195.51	194.44	2.29	0	4.66	148	58.4	320	214	11.2	4.88	6.06	14.64	-2.8	-2.61	4.77	57.8	1	1	3	0
L-pyroglutamicacid	0.1% formic acid water	0.1% formic acid methanol	20% B isocratic elution	-0.546029	-0.56	-0.51	2.43	-0.05	-1.65	-4.16	0.18	0	-3.19	20.84	-0.8	2	3	1	9	154	1110000000000000	-298326	-20.95	0.96	151.34	146.44	2.17	0	7.17	137	11.3	267	-26.3	6.36	6.48	3.66	21.17	-4.87	-2.3	6.22	66.4	1	1	1	0
Tyramine	0.1% formic acid water	0.1% formic acid methanol	20% B isocratic elution	0.326326	-0.07	0.21	3.22	0.15	-1.21	-5.51	-0.01	0	-2.72	20.84	1.1	2	2	2	10	87.3	1.11e+20	-277120	-13.98	0.82	183.62	181.83	2.26	0	2.6	106	27.2	227	168	5.88	3.52	8.82	18.57	0.95	-2.63	3.17	46.2	0	1	1	0
Histamine	0.1% formic acid water	0.1% formic acid methanol	20% B isocratic elution	0.425036	0.69	-0.51	2.94	0.07	-1.47	-4.65	0.18	0	-3.07	20.84	-0.7	2	2	2	8	64.7	1.11e+16	-226118	-18.32	0.8	155.19	146.49	2.17	0	4.89	122	68.6	307	360	10.5	2.98	8.7	18.47	-1.26	-2.85	4.92	54.7	1	1	3	0
AaC	0.1% formic acid water	0.1% formic acid methanol	20% B isocratic elution	0.723034	0.18	0.13	2.2	-0.97	-0.7	-6.48	-1.36	0	-2	20.84	2.6	2	2	0	14	219	1.11e+22	-369670	-14.85	0.86	210.7	216.51	2.34	0	2.51	108	-19	154	-31.5	2.67	3.95	5.78	12.59	0.02	-2.83	2.59	54.7	2	3	3	0
IQx	0.1% formic acid water	0.1% formic acid methanol	20% B isocratic elution	0.948838	0.69	-0.65	0.96	-1.21	-1.45	-6.52	-1.36	0	-2.41	20.84	0.6	1	4	0	15	246	1.11e+23	-414479	-25.04	0.93	218.25	227.81	2.36	0.01	8.8	141	56.1	274	235	9.64	3.08	5.71	14.84	-2.23	-2.75	8.88	69.6	2	3	5	0
8-MeIQx	0.1% formic acid water	0.1% formic acid methanol	20% B isocratic elution	1.05051	0.68	-0.61	0.92	-1.14	-1.48	-7.15	-1.36	0	-2.38	20.84	1	1	4	0	16	271	1.11e+26	-439162	-25.13	0.98	237.6	249.06	2.4	0.01	7.72	142	63.8	281	265	10.06	2.97	5.88	15.22	-1.59	-1.95	7.78	69.6	2	3	5	0
MeIQ	0.1% formic acid water	0.1% formic acid methanol	20% B isocratic elution	1.00531	0.72	-0.17	1.35	-1.05	-1.1	-7.23	-1.36	0	-2.09	20.84	2	1	3	0	16	270	1.11e+27	-429091	-21.18	0.93	236.91	253.92	2.4	0	9.17	124	38.5	216	166	7.22	2.74	7.22	16.13	0.27	-4.33	9.28	56.7	2	3	4	0
IQ[4,5-b]	0.1% formic acid water	0.1% formic acid methanol	20% B isocratic elution	0.920293	0.66	-0.68	0.7	-1.23	-1.39	-6.77	-1.36	0	-2.45	20.84	1.7	1	3	0	15	245	1.11e+24	-404413	-27.45	0.9	223.43	232.81	2.37	0	10.84	139	39.2	269	182	8.87	4.02	6.83	16.69	-0.82	-4.58	11	56.7	2	3	4	0
Harman	0.1% formic acid water	0.1% formic acid methanol	20% B isocratic elution	1.13184	0.92	0.73	2.69	-0.74	-0.6	-6.67	-1.36	0	-1.91	20.84	3.6	1	1	0	14	216	1.11e+23	-359587	-12.73	0.59	214.44	223.28	2.35	0	4.55	81.6	10	132	63.3	3.7	2.33	7.72	16.34	1.94	-4.95	4.58	28.7	2	3	2	0
IQ	0.1% formic acid water	0.1% formic acid methanol	20% B isocratic elution	1.04524	0.83	-0.2	1.43	-1.13	-1.07	-6.76	-1.36	0	-2.12	20.84	1.5	1	3	0	15	245	1.11e+24	-404413	-20.86	0.92	222.22	233.02	2.37	0	8.83	123	32.7	213	148	6.9	2.78	7	15.75	-0.15	-2.69	8.95	56.7	2	3	4	0
Norharman	0.1% formic acid water	0.1% formic acid methanol	20% B isocratic elution	0.987643	0.88	0.45	2.73	-0.87	-0.67	-6.08	-1.36	0	-2.01	20.84	3.2	1	1	0	13	193	1.11e+20	-334905	-13.23	0.56	196.55	201.82	2.3	0	4.61	85.1	3.38	142	46.2	3.74	2.88	7.61	16.32	1.37	-4.84	4.64	28.7	2	3	2	0
DMIP	0.1% formic acid water	0.1% formic acid methanol	20% B isocratic elution	1.20115	0.83	-0.64	1.51	-0.5	-1.46	-5.87	-0.59	0	-2.79	20.84	1	1	3	0	12	172	1.11e+21	-332645	-25.27	0.81	195.56	198.01	2.3	0.01	9.99	128	57.4	269	243	9.75	3.19	7.16	17.5	-1.15	-4.24	10.15	56.7	2	2	4	0
Phe-p-1	0.1% formic acid water	0.1% formic acid methanol	20% B isocratic elution	1.18396	0.97	0.6	2.74	-0.59	-0.59	-6.47	-1.16	0	-2	20.84	2.3	1	2	1	13	152	1.11e+22	-335660	-12.87	0.73	209.56	213.73	2.33	0	3.22	91.3	4.88	123	51	3.16	1.78	7	14.9	1.32	-6	3.7	38.9	1	2	2	0
7,8-DiMeIQx	0.1% formic acid water	0.1% formic acid methanol	20% B isocratic elution	0.95555	0.81	-0.55	0.84	-1.08	-1.49	-7.7	-1.36	0	-2.34	20.84	1.4	1	4	0	17	297	1.11e+29	-463843	-25.35	1.03	254.55	269.67	2.43	0.01	6.62	143	68.9	284	281	10.44	2.87	6.01	15.48	-1.09	-4.51	6.74	69.6	2	3	5	0
Sarcosine	0.1% formic acid water	0.1% formic acid methanol	20% B isocratic elution	-0.32017	-0.21	0.22	4.28	1.12	-1.22	-3.58	1.14	0	-3.13	20.84	-2.8	2	3	2	6	52.8	1110000000000	-203238	-12.38	0.78	127.98	113.01	2.05	0	2.92	94.2	17.5	201	42.4	4.57	4.19	4.37	24.65	-2.74	-4.93	8.22	49.3	0	0	1	0
Creatinine	0.1% formic acid water	0.1% formic acid methanol	20% B isocratic elution	0.692713	0.51	-0.99	1.29	-0.27	-1.86	-4.21	0.18	0	-3.46	20.84	-1.8	1	1	0	8	151	111000000000000	-248681	-30.05	0.8	143.83	134.46	2.13	0	11.98	146	74.4	333	274	12.86	4.35	5.11	15.98	-5.3	-5.49	12.08	58.7	1	1	3	0
L-dihydrooroticacid	0.1% formic acid water	0.1% formic acid methanol	20% B isocratic elution	-1.64195	-1.6	-0.76	1.72	-0.4	-1.92	-4.43	-0.01	0	-3.24	20.84	-1.5	3	4	1	11	225	1.11e+16	-379565	-23.86	1.38	167.39	163.4	2.21	0.01	5.18	172	-17.2	327	-144	5.51	8.7	2.35	17.25	-6.68	-4.92	4.87	95.5	1	1	2	0
L-Carnosine	0.1% formic acid water	0.1% formic acid methanol	20% B isocratic elution	0.157839	-0.4	-1.73	-0.26	-0.44	-2.84	-7.25	0.18	0	-3.77	20.84	-4	4	5	6	16	259	1.11e+29	-499765	-38.44	1.62	256.29	270.05	2.43	0	12.99	233	51	527	223	14.27	9.82	9.18	20.43	-2.61	-2.2	9.07	121	1	1	4	0
Betaine	0.1% formic acid water	0.1% formic acid methanol	20% B isocratic elution	0.835119	0.47	-2.23	-0.47	0.55	-2.53	-4.53	1.14	0	-4.44	20.84	0.5	0	2	1	8	87.6	1.11e+18	-252565	-41.59	0.81	153.39	154.86	2.19	0	15.35	178	181	468	789	21.46	0.08	1.63	14.25	-9.97	-2.66	15.47	40.1	0	0	1	0
Cytosine	0.1% formic acid water	0.1% formic acid methanol	20% B isocratic elution	0.635652	0.27	-0.75	0.33	-1.01	-2.22	-3.99	-0.01	0	-3.48	20.84	-1.7	2	2	0	8	170	1110000000000	-247927	-34.38	0.87	136.73	126.12	2.1	0	12.89	167	25.9	432	122	12.95	9.67	6.77	18.33	-4	-2.61	13.02	67.5	1	1	3	0
Hypoxanthine	0.1% formic acid water	0.1% formic acid methanol	20% B isocratic elution	0.0324407	0.08	-0.72	1.31	-1.14	-1.82	-4.28	-0.59	0	-3.06	20.84	-0.5	2	3	0	10	190	11100000000000	-305849	-25.27	0.97	150.2	143.93	2.16	0.01	2.51	159	5.76	351	-26.8	8.83	8.14	3.33	11.33	-6.92	-2.86	2.6	70.1	2	2	4	0
Xanthine	0.1% formic acid water	0.1% formic acid methanol	20% B isocratic elution	-0.470386	-0.34	-0.71	1.37	-1.16	-1.8	-4.52	-0.59	0	-2.94	20.84	-0.7	3	3	0	11	217	111000000000000	-353097	-23.72	1.25	159.89	153.96	2.19	0.01	6.06	170	-15.1	367	-128	7.64	10.2	7.74	22.93	-2.99	-2.73	6.1	86.9	2	2	4	0
Guanine	0.1% formic acid water	0.1% formic acid methanol	20% B isocratic elution	0.151858	0.02	-1.03	0.35	-1.53	-2.25	-4.69	-0.59	0	-3.2	20.84	-1.1	3	3	0	11	225	1110000000000000	-340610	-30.43	1.22	164.42	158.81	2.2	0.01	3.28	191	-7.34	441	-50.1	10.78	11.63	4.81	13.86	-5.99	-2.81	3.34	96.2	2	2	5	0
Adenine	0.1% formic acid water	0.1% formic acid methanol	20% B isocratic elution	1.04431	0.4	-0.94	0.65	-1.32	-1.93	-4.46	-0.59	0	-2.99	20.84	-0.1	2	4	0	10	127	111000000000000	-293365	-30.51	0.99	153.88	148.09	2.17	0	11.17	161	9.31	380	47.5	10.2	8.73	5.5	15	-4.52	-2.45	11.33	80.5	2	2	5	0
Beta-Thymidine	0.1% formic acid water	0.1% formic acid methanol	20% B isocratic elution	-1.23098	-1.78	-0.87	1.16	-0.99	-1.9	-7.06	-0.97	0	-2.72	20.84	-1.2	3	5	2	17	381	1.11e+30	-549390	-24.52	1.42	246.36	266.66	2.43	0.01	4.01	176	50.1	310	96.6	9.28	5.39	15.53	45.1	-0.93	-3.96	6.43	99.1	1	2	2	0
Cytidine	0.1% formic acid water	0.1% formic acid methanol	20% B isocratic elution	-0.467387	-0.81	-1.61	-2.05	-1.88	-2.8	-6.77	-0.97	0	-3.03	20.84	-2.1	4	5	2	17	383	1.11e+29	-559442	-33.42	1.74	241.37	261.47	2.42	0.01	6.86	228	40.6	467	146	13.35	9.24	15.82	45.67	-2.4	-3.46	9.4	129	1	2	3	0
Inosine	0.1% formic acid water	0.1% formic acid methanol	20% B isocratic elution	-1.26895	-1.28	-1.84	-1.34	-2.33	-2.88	-7.22	-1.55	0	-2.91	20.84	-1.3	4	7	2	19	405	1.11e+30	-617361	-37.38	1.8	261.27	285.84	2.46	0.01	9.42	243	21.5	459	3.18	11.36	10.23	10.31	29.87	-2.75	-2.08	9.18	129	2	3	4	0
Xanthosine	0.1% formic acid water	0.1% formic acid methanol	20% B isocratic elution	-1.13395	-1.22	-1.73	-1.92	-2.13	-2.81	-7.27	-1.55	0	-2.85	20.84	-2.4	5	7	2	20	434	1.11e+31	-664603	-37.75	1.91	265.99	291.82	2.47	0.01	15.45	240	28.5	439	14	11	9.33	12.24	32.43	-2.45	-3.34	12.18	146	2	3	4	0
Guanosine	0.1% formic acid water	0.1% formic acid methanol	20% B isocratic elution	-0.883608	-0.64	-2.14	-2.39	-2.69	-3.16	-7.67	-1.55	0	-2.96	20.84	-1.9	5	7	2	20	446	1.11e+32	-652123	-42.64	2.09	276.17	298.73	2.48	0.01	11.43	271	-5.63	543	-85.9	12.26	14.35	13.14	36.02	-2.86	-2.22	11.13	155	2	3	5	0
Uridine	0.1% formic acid water	0.1% formic acid methanol	20% B isocratic elution	-1.38204	-1.26	-1.01	-0.25	-1.04	-1.93	-6.52	-0.97	0	-2.75	20.84	-2	4	6	2	17	371	1.11e+28	-571934	-25.98	1.71	235.87	256.94	2.41	0.01	5.57	194	28.6	328	37.3	8.29	6.3	11.64	34.25	-0.98	-1.56	4.28	119	1	2	2	0
Adenosine	0.1% formic acid water	0.1% formic acid methanol	20% B isocratic elution	-0.305255	-0.07	-0.96	0.66	-1.65	-1.83	-7.23	-1.55	0	-2.18	20.84	-1.1	4	8	2	19	335	1.11e+31	-604889	-23.66	1.73	253.58	283.19	2.45	0.01	2.18	191	36.3	322	107	8.99	5.54	14.19	39.95	-0.74	-3.53	3.84	140	2	3	5	0
D-Pantothenic acid	0.1% formic acid water	0.1% formic acid methanol	35% B isocratic elution	-1.082	-0.75	-1.33	1.6	0.15	-2.18	-7.23	1.14	0	-3.34	22.95	-1.1	4	5	6	15	239	1.11e+31	-492236	-26.02	1.56	247.96	269.32	2.43	0	7.46	186	7.26	354	-39.4	8.13	8.95	6.22	23.15	-1.05	-7.18	4.69	107	0	0	1	0
niacinamide	0.1% formic acid water	0.1% formic acid methanol	35% B isocratic elution	0.781803	0.22	-0.4	3.02	-0.28	-1.05	-4.62	-0.01	0	-2.76	22.95	-0.4	1	2	1	9	114	111000000000000	-261773	-16.8	0.79	152.74	146.35	2.17	0	2.95	112	27.7	215	95.8	7.01	3.68	5.08	12.91	-3.24	-5.1	4.94	56	1	1	2	0
Pyridoxal	0.1% formic acid water	0.1% formic acid methanol	35% B isocratic elution	0.507734	0.17	-0.36	2.47	-0.46	-1.31	-5.54	-0.01	0	-2.54	22.95	0	2	4	2	12	162	1.11e+20	-370806	-16.87	1.08	190.02	193.09	2.29	0.01	3.53	121	8.31	226	-19.7	4.94	5.51	5.04	18.08	-1.4	-2.71	3.58	70.4	1	1	1	0
Pyridoxine	0.1% formic acid water	0.1% formic acid methanol	35% B isocratic elution	0.996346	0.77	-0.74	1.77	-0.73	-1.58	-5.71	-0.01	0	-2.71	22.95	-0.8	3	4	2	12	142	1.11e+22	-371565	-22.39	1.06	195.11	198.18	2.3	0	9.44	137	11.5	264	32	6.46	6.06	11.25	32	0.01	-3.22	2.9	73.6	1	1	1	0
Pyridoxamine	0.1% formic acid water	0.1% formic acid methanol	35% B isocratic elution	0.974352	0.51	-0.67	2.14	-0.69	-1.67	-5.88	-0.01	0	-2.67	22.95	-1	3	4	2	12	143	1.11e+23	-359090	-19.85	1.23	199.15	205.79	2.31	0.01	2.37	144	49.5	321	233	9.73	4.96	8.51	18.04	-0.23	-3.37	4.35	79.4	1	1	2	0
Thiamine	0.1% formic acid water	0.1% formic acid methanol	35% B isocratic elution	0.708414	0.37	0	0	-0.65	-1.58	-9.14	-0.97	0	-3.32	22.95	0	2	6	4	19	269	1.11e+34	-727954	-65.42	1.49	291.55	320.17	2.51	-0.99	0	200	-71.2	335	-70.9	6.56	7.95	14.5	36.27	1.75	-2.99	10.15	104	2	2	4	1
Nicotinicacid	0.1% formic acid water	0.1% formic acid methanol	35% B isocratic elution	0.188647	0.28	0.04	3.56	-0.25	-1.01	-4.33	-0.01	0	-2.47	22.95	0.4	1	3	1	9	114	11100000000000	-274248	-12.08	0.77	149.15	142	2.15	0	0.88	92.9	1.16	177	-39.1	3.37	4.37	3.73	20.67	-2.73	-2.8	3.67	50.2	1	1	1	0
Alanine	0.1% formic acid water	0.1% formic acid methanol	35% B isocratic elution	-0.237165	-0.19	-0.11	3.79	0.84	-1.18	-3.51	1.14	0	-3.06	22.95	-3	2	3	1	6	61.8	1110000000000	-203245	-12.07	0.88	123.86	112.49	2.05	0	1.93	103	20.6	223	81.1	5.25	4.15	6.92	15.51	-0.69	-4.07	2.88	63.3	0	0	1	0
Leucine	0.1% formic acid water	0.1% formic acid methanol	35% B isocratic elution	0.180252	0.28	0.1	3.98	0.87	-1.04	-5.27	1.14	0	-2.81	22.95	-1.5	2	3	3	9	101	1.11e+21	-277279	-11.49	0.91	176.64	178.51	2.25	0	1.75	97.3	10	188	15.9	4.1	4.03	4.32	23.12	-1.46	-4.42	4.6	63.3	0	0	1	0
Isoleucine	0.1% formic acid water	0.1% formic acid methanol	35% B isocratic elution	0.302911	0.26	0.11	3.99	0.85	-1	-5.22	1.14	0	-2.77	22.95	-1.7	2	3	3	9	103	1.11e+21	-277278	-11.39	0.9	174.76	177.8	2.25	0	1.86	95.2	4.07	178	-13.2	3.66	4.06	5.29	24.73	-0.48	-4.81	8.21	63.3	0	0	1	0
Valine	0.1% formic acid water	0.1% formic acid methanol	35% B isocratic elution	0.437574	0.14	-0.17	3.48	1.29	-0.7	-4.64	1.14	0	-3.11	22.95	-2.3	2	3	2	8	90.4	1.11e+18	-252603	-16.64	0.58	154.87	154.22	2.19	0	7.95	86.9	30.2	126	74.6	3.87	1.16	5.48	13.49	-1.89	-5.23	8.12	63.3	0	0	1	0
Proline	0.1% formic acid water	0.1% formic acid methanol	35% B isocratic elution	0.119317	0.33	-0.11	3.62	-0.08	-1.08	-4.33	0.18	0	-2.64	22.95	-2.5	2	3	1	8	103	1.11e+16	-251835	-13.13	0.77	147.6	142.26	2.15	0	3.61	94.9	18	192	36.7	4.47	4	3.51	21.36	-3.35	-4.13	3.48	49.3	1	1	1	0
Phenylalanine	0.1% formic acid water	0.1% formic acid methanol	35% B isocratic elution	0.34383	0.16	-0.36	2.97	-0.17	-1.11	-6	-0.01	0	-2.62	22.95	-1.5	2	3	3	12	153	1.11e+22	-348280	-15.74	1.01	200.74	208.03	2.32	0	2.66	122	9.49	216	30.8	4.48	4.38	4.16	22.91	-1.94	-2.63	7.78	63.3	0	1	1	0
Methionine	0.1% formic acid water	0.1% formic acid methanol	35% B isocratic elution	-0.246795	-0.08	-0.34	3.26	0.72	-1.18	-5.74	1.14	0	-3.02	22.95	-1.9	2	4	4	9	97	1.11e+19	-502501	-15.83	1.08	186.45	185.96	2.27	0.01	4.25	126	19.1	229	42.1	4.86	4.41	4.94	22.93	-1.51	-3.09	4.05	88.6	0	0	1	1
Tryptophan	0.1% formic acid water	0.1% formic acid methanol	35% B isocratic elution	-0.103644	-0.23	-0.9	1.74	-0.89	-1.3	-7.01	-0.59	0	-2.55	22.95	-1.1	3	3	3	15	245	1.11e+26	-430876	-21.02	1.24	233.33	250.05	2.4	0	5.34	153	-10.6	271	-20.2	4.73	6.7	4.11	22.25	-1.98	-4.08	5.74	79.1	1	2	2	0
Serine	0.1% formic acid water	0.1% formic acid methanol	35% B isocratic elution	-0.247421	-0.3	-0.29	2.82	0.79	-1.22	-3.66	1.14	0	-3.14	22.95	-3.1	3	4	2	7	72.6	11100000000000	-250467	-14.94	1.06	132.32	122.02	2.09	0	3.06	118	4.07	216	-33.2	4.49	4.85	3.58	19.55	-4.08	-3.26	0.99	83.6	0	0	1	0
Glutamine	0.1% formic acid water	0.1% formic acid methanol	35% B isocratic elution	-0.571825	-0.32	-0.91	1.53	0.5	-1.88	-5.15	1.14	0	-3.65	22.95	-3.1	3	4	4	10	146	1.11e+19	-333835	-24.89	1.35	180.5	176.05	2.25	0	6.95	174	25	351	64	9.61	7.18	5.6	22.19	-3.61	-5.52	7.53	106	0	0	2	0
Threonine	0.1% formic acid water	0.1% formic acid methanol	35% B isocratic elution	-0.20328	-0.2	-0.25	3.49	0.71	-1.26	-4.22	1.14	0	-2.99	22.95	-2.9	3	4	2	8	93.3	1.11e+16	-275147	-14.56	1.14	149.43	144.38	2.16	0.01	4	119	6.4	228	-10.9	5.24	4.98	2.45	17.53	-4.59	-5.42	3.68	83.6	0	0	1	0
Cysteine	0.1% formic acid water	0.1% formic acid methanol	35% B isocratic elution	-0.572711	-0.45	-0.24	3.62	0.58	-0.93	-4.57	1.14	0	-2.83	22.95	-2.5	3	4	2	7	75.3	11100000000000	-453148	-13.45	1	147.18	141.36	2.15	0.01	3.06	108	-15.6	173	-97.6	1.79	4.69	5.27	20.11	-1.25	-3.34	5	64.3	0	0	1	1
Asparagine	0.1% formic acid water	0.1% formic acid methanol	35% B isocratic elution	-0.686488	-0.37	-0.79	2.07	0.56	-1.91	-4.49	1.14	0	-3.81	22.95	-3.4	3	4	3	9	134	1.11e+16	-309157	-24.85	1.33	160.84	155.26	2.19	0	3.88	177	14.7	352	34.5	9.05	7.57	3.77	19.29	-6.05	-4.96	6.4	106	0	0	2	0
Glutamicacid	0.1% formic acid water	0.1% formic acid methanol	35% B isocratic elution	-0.623277	-0.27	-0.75	2.12	0.97	-1.44	-4.82	1.14	0	-3.7	22.95	-3.7	3	5	4	10	145	1.11e+18	-346311	-25.1	1.06	172.73	167.41	2.22	0	8.05	150	9.3	247	-26.7	4.8	5.32	4.16	20.54	-4.48	-4.16	4.84	101	0	0	1	1
Lysine	0.1% formic acid water	0.1% formic acid methanol	35% B isocratic elution	0.0155458	-0.26	-0.71	2.83	1.15	-1.2	-5.71	1.14	0	-3.43	22.95	-3	3	4	5	10	106	1.11e+23	-312026	-21.17	0.86	191.1	191.01	2.28	0	5.99	127	75.3	255	325	8.64	1.15	8.95	18.74	-1	-1.73	0.96	89.3	0	0	2	0
Arginine	0.1% formic acid water	0.1% formic acid methanol	35% B isocratic elution	0.0384261	0.08	-1.26	1.47	0.72	-1.65	-6.36	1.14	0	-3.69	22.95	-4.2	4	4	5	12	176	1.11e+25	-380778	-28.48	1.38	214.93	214.24	2.33	0	9.11	182	56.4	339	241	10.62	3.9	10.66	22.26	-2.7	-2.93	1.97	128	0	0	4	0
Histidine	0.1% formic acid water	0.1% formic acid methanol	35% B isocratic elution	0.318873	-0.04	-0.97	1.3	0.07	-1.46	-5.27	0.18	0	-3.51	22.95	-3.2	3	4	3	11	151	1.11e+19	-344509	-27.47	0.98	180.91	181.77	2.26	0	5.04	160	36.7	296	139	8.38	4.38	5.7	14.6	-3.9	-4.52	8.26	92	1	1	3	0
Citrulline	0.1% formic acid water	0.1% formic acid methanol	35% B isocratic elution	-0.0493375	-0.43	-1.3	1.3	0.38	-2.27	-6.19	1.14	0	-3.9	22.95	-4.3	4	4	5	12	171	1.11e+24	-393268	-29.64	1.53	214.73	215.15	2.33	0	7.6	204	40.5	433	151	12.42	8.36	5.05	24.14	-4.38	-3.03	2.31	118	0	0	3	0
Taurine	0.1% formic acid water	0.1% formic acid methanol	35% B isocratic elution	-1.06392	-0.81	-0.56	3.08	0.82	-1.43	-3.93	1.14	0	-3.45	22.95	-4.1	2	4	2	7	120	11100000000000	-476406	-18.56	1.09	143.51	133.49	2.13	0.01	3.57	138	-7.89	285	-71.8	4.16	6.16	-2.47	10.55	-10.36	-3.86	3.47	88.8	0	0	1	1
Tyrosine	0.1% formic acid water	0.1% formic acid methanol	35% B isocratic elution	-0.00527504	0.06	-0.91	2.22	-0.55	-1.7	-6.11	-0.01	0	-2.9	22.95	-2.3	3	4	3	13	176	1.11e+23	-395507	-20.45	1.27	210.41	219.03	2.34	0	4.34	158	-11.2	301	-58.2	5.35	7.81	4.18	23.28	-2.58	-2.6	8.84	83.6	0	1	1	0
Hypotaurine	0.1% formic acid water	0.1% formic acid methanol	35% B isocratic elution	-0.555313	-0.45	-0.48	3.16	0.61	-1.46	-4.05	1.14	0	-3.39	22.95	-1.5	2	4	2	6	55.5	1110000000000	-429187	-19.14	0.95	136.46	125.99	2.1	0	5.56	129	43.8	272	164	8.05	3.84	8.34	19	-1.9	-2.55	5.19	82.5	0	0	1	1
L-Hydroxyproline	0.1% formic acid water	0.1% formic acid methanol	35% B isocratic elution	-0.17757	-0.07	-0.6	2.82	-0.35	-1.71	-4.41	0.18	0	-3.04	22.95	-3.3	3	4	1	9	125	1.11e+17	-299059	-18.75	1.12	155.95	154.27	2.19	0	3.05	140	34.4	301	118	8.1	5.75	7.9	18.5	-1.19	-2.19	3.72	69.6	1	1	1	0
N-omiga-acetylhistamine	0.1% formic acid water	0.1% formic acid methanol	35% B isocratic elution	0.875137	0.88	-1.01	2.28	-0.1	-1.57	-5.96	0.18	0	-3.33	22.95	-0.4	2	2	3	11	138	1.11e+21	-321960	-23.57	0.83	195.51	194.44	2.29	0	4.66	148	58.4	320	214	11.2	4.88	6.06	14.64	-2.8	-2.61	4.77	57.8	1	1	3	0
L-pyroglutamicacid	0.1% formic acid water	0.1% formic acid methanol	35% B isocratic elution	-0.584075	-0.55	-0.59	2.43	-0.14	-1.5	-4.27	0.18	0	-3.19	22.95	-0.8	2	3	1	9	154	1110000000000000	-298326	-20.95	0.96	151.34	146.44	2.17	0	7.17	137	11.3	267	-26.3	6.36	6.48	3.66	21.17	-4.87	-2.3	6.22	66.4	1	1	1	0
Tyramine	0.1% formic acid water	0.1% formic acid methanol	35% B isocratic elution	0.357913	-0.09	-0.19	3.22	-0.29	-1.11	-5.62	-0.01	0	-2.58	22.95	1.1	2	2	2	10	87.3	1.11e+20	-277120	-13.98	0.82	183.62	181.83	2.26	0	2.6	106	27.2	227	168	5.88	3.52	8.82	18.57	0.95	-2.63	3.17	46.2	0	1	1	0
Histamine	0.1% formic acid water	0.1% formic acid methanol	35% B isocratic elution	0.425583	0.72	-0.65	2.94	-0.08	-1.33	-4.73	0.18	0	-3.04	22.95	-0.7	2	2	2	8	64.7	1.11e+16	-226118	-18.32	0.8	155.19	146.49	2.17	0	4.89	122	68.6	307	360	10.5	2.98	8.7	18.47	-1.26	-2.85	4.92	54.7	1	1	3	0
AaC	0.1% formic acid water	0.1% formic acid methanol	35% B isocratic elution	0.878312	0.63	-0.33	2.2	-1.53	-0.63	-6.6	-1.36	0.01	-1.83	22.95	2.6	2	2	0	14	219	1.11e+22	-369670	-14.85	0.86	210.7	216.51	2.34	0	2.51	108	-19	154	-31.5	2.67	3.95	5.78	12.59	0.02	-2.83	2.59	54.7	2	3	3	0
IQx	0.1% formic acid water	0.1% formic acid methanol	35% B isocratic elution	0.977191	0.64	-0.91	0.96	-1.56	-1.3	-6.65	-1.36	0	-2.32	22.95	0.6	1	4	0	15	246	1.11e+23	-414479	-25.04	0.93	218.25	227.81	2.36	0.01	8.8	141	56.1	274	235	9.64	3.08	5.71	14.84	-2.23	-2.75	8.88	69.6	2	3	5	0
8-MeIQx	0.1% formic acid water	0.1% formic acid methanol	35% B isocratic elution	1.10727	0.64	-0.95	0.92	-1.58	-1.32	-7.28	-1.36	0	-2.26	22.95	1	1	4	0	16	271	1.11e+26	-439162	-25.13	0.98	237.6	249.06	2.4	0.01	7.72	142	63.8	281	265	10.06	2.97	5.88	15.22	-1.59	-1.95	7.78	69.6	2	3	5	0
MeIQ	0.1% formic acid water	0.1% formic acid methanol	35% B isocratic elution	1.17091	0.79	-0.62	1.35	-1.6	-0.97	-7.37	-1.36	0.01	-1.93	22.95	2	1	3	0	16	270	1.11e+27	-429091	-21.18	0.93	236.91	253.92	2.4	0	9.17	124	38.5	216	166	7.22	2.74	7.22	16.13	0.27	-4.33	9.28	56.7	2	3	4	0
IQ[4,5-b]	0.1% formic acid water	0.1% formic acid methanol	35% B isocratic elution	0.942568	0.67	-0.96	0.7	-1.61	-1.26	-6.9	-1.36	0	-2.36	22.95	1.7	1	3	0	15	245	1.11e+24	-404413	-27.45	0.9	223.43	232.81	2.37	0	10.84	139	39.2	269	182	8.87	4.02	6.83	16.69	-0.82	-4.58	11	56.7	2	3	4	0
Harman	0.1% formic acid water	0.1% formic acid methanol	35% B isocratic elution	1.3158	0.87	0.16	2.69	-1.42	-0.54	-6.79	-1.36	0.01	-1.69	22.95	3.6	1	1	0	14	216	1.11e+23	-359587	-12.73	0.59	214.44	223.28	2.35	0	4.55	81.6	10	132	63.3	3.7	2.33	7.72	16.34	1.94	-4.95	4.58	28.7	2	3	2	0
IQ	0.1% formic acid water	0.1% formic acid methanol	35% B isocratic elution	1.08866	0.88	-0.59	1.43	-1.61	-0.95	-6.89	-1.36	0	-1.98	22.95	1.5	1	3	0	15	245	1.11e+24	-404413	-20.86	0.92	222.22	233.02	2.37	0	8.83	123	32.7	213	148	6.9	2.78	7	15.75	-0.15	-2.69	8.95	56.7	2	3	4	0
Norharman	0.1% formic acid water	0.1% formic acid methanol	35% B isocratic elution	1.13899	0.82	-0.02	2.73	-1.43	-0.61	-6.2	-1.36	0.01	-1.83	22.95	3.2	1	1	0	13	193	1.11e+20	-334905	-13.23	0.56	196.55	201.82	2.3	0	4.61	85.1	3.38	142	46.2	3.74	2.88	7.61	16.32	1.37	-4.84	4.64	28.7	2	3	2	0
DMIP	0.1% formic acid water	0.1% formic acid methanol	35% B isocratic elution	1.2182	0.81	-0.86	1.51	-0.78	-1.32	-5.98	-0.59	0	-2.72	22.95	1	1	3	0	12	172	1.11e+21	-332645	-25.27	0.81	195.56	198.01	2.3	0.01	9.99	128	57.4	269	243	9.75	3.19	7.16	17.5	-1.15	-4.24	10.15	56.7	2	2	4	0
Phe-p-1	0.1% formic acid water	0.1% formic acid methanol	35% B isocratic elution	1.33494	0.91	0.07	2.74	-1.21	-0.53	-6.6	-1.16	0.01	-1.81	22.95	2.3	1	2	1	13	152	1.11e+22	-335660	-12.87	0.73	209.56	213.73	2.33	0	3.22	91.3	4.88	123	51	3.16	1.78	7	14.9	1.32	-6	3.7	38.9	1	2	2	0
7,8-DiMeIQx	0.1% formic acid water	0.1% formic acid methanol	35% B isocratic elution	1.02092	0.76	-0.97	0.84	-1.61	-1.34	-7.84	-1.36	0	-2.19	22.95	1.4	1	4	0	17	297	1.11e+29	-463843	-25.35	1.03	254.55	269.67	2.43	0.01	6.62	143	68.9	284	281	10.44	2.87	6.01	15.48	-1.09	-4.51	6.74	69.6	2	3	5	0
Sarcosine	0.1% formic acid water	0.1% formic acid methanol	35% B isocratic elution	-0.325818	-0.19	-0.03	4.28	0.89	-1.11	-3.67	1.14	0	-3.05	22.95	-2.8	2	3	2	6	52.8	1110000000000	-203238	-12.38	0.78	127.98	113.01	2.05	0	2.92	94.2	17.5	201	42.4	4.57	4.19	4.37	24.65	-2.74	-4.93	8.22	49.3	0	0	1	0
Creatinine	0.1% formic acid water	0.1% formic acid methanol	35% B isocratic elution	0.656054	0.52	-0.87	1.29	-0.16	-1.68	-4.28	0.18	0	-3.54	22.95	-1.8	1	1	0	8	151	111000000000000	-248681	-30.05	0.8	143.83	134.46	2.13	0	11.98	146	74.4	333	274	12.86	4.35	5.11	15.98	-5.3	-5.49	12.08	58.7	1	1	3	0
L-dihydrooroticacid	0.1% formic acid water	0.1% formic acid methanol	35% B isocratic elution	-1.68489	-1.98	-0.79	1.72	-0.45	-1.74	-4.56	-0.01	0	-3.25	22.95	-1.5	3	4	1	11	225	1.11e+16	-379565	-23.86	1.38	167.39	163.4	2.21	0.01	5.18	172	-17.2	327	-144	5.51	8.7	2.35	17.25	-6.68	-4.92	4.87	95.5	1	1	2	0
L-Carnosine	0.1% formic acid water	0.1% formic acid methanol	35% B isocratic elution	0.156729	-0.24	-1.78	-0.26	-0.57	-2.58	-7.41	0.18	0	-3.78	22.95	-4	4	5	6	16	259	1.11e+29	-499765	-38.44	1.62	256.29	270.05	2.43	0	12.99	233	51	527	223	14.27	9.82	9.18	20.43	-2.61	-2.2	9.07	121	1	1	4	0
Betaine	0.1% formic acid water	0.1% formic acid methanol	35% B isocratic elution	0.759535	0.61	-1.92	-0.47	0.83	-2.32	-4.61	1.14	0	-4.61	22.95	0.5	0	2	1	8	87.6	1.11e+18	-252565	-41.59	0.81	153.39	154.86	2.19	0	15.35	178	181	468	789	21.46	0.08	1.63	14.25	-9.97	-2.66	15.47	40.1	0	0	1	0
Cytosine	0.1% formic acid water	0.1% formic acid methanol	35% B isocratic elution	0.591361	0.21	-0.54	0.33	-0.84	-2.03	-4.06	-0.01	0	-3.6	22.95	-1.7	2	2	0	8	170	1110000000000	-247927	-34.38	0.87	136.73	126.12	2.1	0	12.89	167	25.9	432	122	12.95	9.67	6.77	18.33	-4	-2.61	13.02	67.5	1	1	3	0
Hypoxanthine	0.1% formic acid water	0.1% formic acid methanol	35% B isocratic elution	-0.0129478	0.09	-0.62	1.31	-1.07	-1.64	-4.37	-0.59	0	-3.14	22.95	-0.5	2	3	0	10	190	11100000000000	-305849	-25.27	0.97	150.2	143.93	2.16	0.01	2.51	159	5.76	351	-26.8	8.83	8.14	3.33	11.33	-6.92	-2.86	2.6	70.1	2	2	4	0
Xanthine	0.1% formic acid water	0.1% formic acid methanol	35% B isocratic elution	-0.509779	-0.23	-0.68	1.37	-1.15	-1.62	-4.62	-0.59	0	-2.99	22.95	-0.7	3	3	0	11	217	111000000000000	-353097	-23.72	1.25	159.89	153.96	2.19	0.01	6.06	170	-15.1	367	-128	7.64	10.2	7.74	22.93	-2.99	-2.73	6.1	86.9	2	2	4	0
Guanine	0.1% formic acid water	0.1% formic acid methanol	35% B isocratic elution	0.112089	0.17	-0.86	0.35	-1.41	-2.04	-4.78	-0.59	0	-3.31	22.95	-1.1	3	3	0	11	225	1110000000000000	-340610	-30.43	1.22	164.42	158.81	2.2	0.01	3.28	191	-7.34	441	-50.1	10.78	11.63	4.81	13.86	-5.99	-2.81	3.34	96.2	2	2	5	0
Adenine	0.1% formic acid water	0.1% formic acid methanol	35% B isocratic elution	1.0168	0.43	-0.85	0.65	-1.27	-1.75	-4.54	-0.59	0	-3.06	22.95	-0.1	2	4	0	10	127	111000000000000	-293365	-30.51	0.99	153.88	148.09	2.17	0	11.17	161	9.31	380	47.5	10.2	8.73	5.5	15	-4.52	-2.45	11.33	80.5	2	2	5	0
Beta-Thymidine	0.1% formic acid water	0.1% formic acid methanol	35% B isocratic elution	-1.19861	-1.77	-1.19	1.16	-1.37	-1.69	-7.22	-0.97	0	-2.62	22.95	-1.2	3	5	2	17	381	1.11e+30	-549390	-24.52	1.42	246.36	266.66	2.43	0.01	4.01	176	50.1	310	96.6	9.28	5.39	15.53	45.1	-0.93	-3.96	6.43	99.1	1	2	2	0
Cytidine	0.1% formic acid water	0.1% formic acid methanol	35% B isocratic elution	-0.471061	-0.9	-1.68	-2.05	-2.02	-2.54	-6.93	-0.97	0	-3.04	22.95	-2.1	4	5	2	17	383	1.11e+29	-559442	-33.42	1.74	241.37	261.47	2.42	0.01	6.86	228	40.6	467	146	13.35	9.24	15.82	45.67	-2.4	-3.46	9.4	129	1	2	3	0
Inosine	0.1% formic acid water	0.1% formic acid methanol	35% B isocratic elution	-1.27768	-1.31	-1.89	-1.34	-2.48	-2.6	-7.41	-1.55	0	-2.92	22.95	-1.3	4	7	2	19	405	1.11e+30	-617361	-37.38	1.8	261.27	285.84	2.46	0.01	9.42	243	21.5	459	3.18	11.36	10.23	10.31	29.87	-2.75	-2.08	9.18	129	2	3	4	0
Xanthosine	0.1% formic acid water	0.1% formic acid methanol	35% B isocratic elution	-1.15135	-1.2	-1.84	-1.92	-2.32	-2.54	-7.47	-1.55	0	-2.84	22.95	-2.4	5	7	2	20	434	1.11e+31	-664603	-37.75	1.91	265.99	291.82	2.47	0.01	15.45	240	28.5	439	14	11	9.33	12.24	32.43	-2.45	-3.34	12.18	146	2	3	4	0
Guanosine	0.1% formic acid water	0.1% formic acid methanol	35% B isocratic elution	-0.880267	-0.68	-2.17	-2.39	-2.83	-2.87	-7.85	-1.55	0	-2.98	22.95	-1.9	5	7	2	20	446	1.11e+32	-652123	-42.64	2.09	276.17	298.73	2.48	0.01	11.43	271	-5.63	543	-85.9	12.26	14.35	13.14	36.02	-2.86	-2.22	11.13	155	2	3	5	0
Uridine	0.1% formic acid water	0.1% formic acid methanol	35% B isocratic elution	-1.38029	-1.04	-1.27	-0.25	-1.36	-1.72	-6.7	-0.97	0	-2.67	22.95	-2	4	6	2	17	371	1.11e+28	-571934	-25.98	1.71	235.87	256.94	2.41	0.01	5.57	194	28.6	328	37.3	8.29	6.3	11.64	34.25	-0.98	-1.56	4.28	119	1	2	2	0
Adenosine	0.1% formic acid water	0.1% formic acid methanol	35% B isocratic elution	-0.250844	-0.14	-1.3	0.66	-2.08	-1.62	-7.39	-1.55	0	-2.06	22.95	-1.1	4	8	2	19	335	1.11e+31	-604889	-23.66	1.73	253.58	283.19	2.45	0.01	2.18	191	36.3	322	107	8.99	5.54	14.19	39.95	-0.74	-3.53	3.84	140	2	3	5	0
D-Pantothenic acid	0.1% formic acid water	0.1% formic acid methanol	50% B isocratic elution	-1.05164	-0.76	-1.45	1.6	-0.1	-2.01	-7.34	1.14	0	-3.32	25.05	-1.1	4	5	6	15	239	1.11e+31	-492236	-26.02	1.56	247.96	269.32	2.43	0	7.46	186	7.26	354	-39.4	8.13	8.95	6.22	23.15	-1.05	-7.18	4.69	107	0	0	1	0
niacinamide	0.1% formic acid water	0.1% formic acid methanol	50% B isocratic elution	0.771655	0.23	-0.44	3.02	-0.38	-0.95	-4.68	-0.01	0	-2.77	25.05	-0.4	1	2	1	9	114	111000000000000	-261773	-16.8	0.79	152.74	146.35	2.17	0	2.95	112	27.7	215	95.8	7.01	3.68	5.08	12.91	-3.24	-5.1	4.94	56	1	1	2	0
Pyridoxal	0.1% formic acid water	0.1% formic acid methanol	50% B isocratic elution	0.514726	0.17	-0.54	2.47	-0.74	-1.21	-5.64	-0.01	0	-2.49	25.05	0	2	4	2	12	162	1.11e+20	-370806	-16.87	1.08	190.02	193.09	2.29	0.01	3.53	121	8.31	226	-19.7	4.94	5.51	5.04	18.08	-1.4	-2.71	3.58	70.4	1	1	1	0
Pyridoxine	0.1% formic acid water	0.1% formic acid methanol	50% B isocratic elution	1.00523	0.77	-0.86	1.77	-0.95	-1.46	-5.8	-0.01	0	-2.69	25.05	-0.8	3	4	2	12	142	1.11e+22	-371565	-22.39	1.06	195.11	198.18	2.3	0	9.44	137	11.5	264	32	6.46	6.06	11.25	32	0.01	-3.22	2.9	73.6	1	1	1	0
Pyridoxamine	0.1% formic acid water	0.1% formic acid methanol	50% B isocratic elution	0.995281	0.62	-0.79	2.14	-0.9	-1.53	-5.97	-0.01	0	-2.64	25.05	-1	3	4	2	12	143	1.11e+23	-359090	-19.85	1.23	199.15	205.79	2.31	0.01	2.37	144	49.5	321	233	9.73	4.96	8.51	18.04	-0.23	-3.37	4.35	79.4	1	1	2	0
Thiamine	0.1% formic acid water	0.1% formic acid methanol	50% B isocratic elution	0.772521	0.4	0	0	-0.92	-1.45	-9.26	-0.97	0	-3.26	25.05	0	2	6	4	19	269	1.11e+34	-727954	-65.42	1.49	291.55	320.17	2.51	-0.99	0	200	-71.2	335	-70.9	6.56	7.95	14.5	36.27	1.75	-2.99	10.15	104	2	2	4	1
Nicotinicacid	0.1% formic acid water	0.1% formic acid methanol	50% B isocratic elution	0.190145	0.29	-0.13	3.56	-0.49	-0.93	-4.41	-0.01	0	-2.42	25.05	0.4	1	3	1	9	114	11100000000000	-274248	-12.08	0.77	149.15	142	2.15	0	0.88	92.9	1.16	177	-39.1	3.37	4.37	3.73	20.67	-2.73	-2.8	3.67	50.2	1	1	1	0
Alanine	0.1% formic acid water	0.1% formic acid methanol	50% B isocratic elution	-0.254784	-0.16	-0.21	3.79	0.72	-1.09	-3.57	1.14	0	-3.05	25.05	-3	2	3	1	6	61.8	1110000000000	-203245	-12.07	0.88	123.86	112.49	2.05	0	1.93	103	20.6	223	81.1	5.25	4.15	6.92	15.51	-0.69	-4.07	2.88	63.3	0	0	1	0
Leucine	0.1% formic acid water	0.1% formic acid methanol	50% B isocratic elution	0.210159	0.31	-0.15	3.98	0.54	-0.95	-5.35	1.14	0	-2.73	25.05	-1.5	2	3	3	9	101	1.11e+21	-277279	-11.49	0.91	176.64	178.51	2.25	0	1.75	97.3	10	188	15.9	4.1	4.03	4.32	23.12	-1.46	-4.42	4.6	63.3	0	0	1	0
Isoleucine	0.1% formic acid water	0.1% formic acid methanol	50% B isocratic elution	0.332861	0.3	-0.15	3.99	0.52	-0.92	-5.29	1.14	0	-2.69	25.05	-1.7	2	3	3	9	103	1.11e+21	-277278	-11.39	0.9	174.76	177.8	2.25	0	1.86	95.2	4.07	178	-13.2	3.66	4.06	5.29	24.73	-0.48	-4.81	8.21	63.3	0	0	1	0
Valine	0.1% formic acid water	0.1% formic acid methanol	50% B isocratic elution	0.437073	0.17	-0.3	3.48	1.11	-0.62	-4.7	1.14	0	-3.08	25.05	-2.3	2	3	2	8	90.4	1.11e+18	-252603	-16.64	0.58	154.87	154.22	2.19	0	7.95	86.9	30.2	126	74.6	3.87	1.16	5.48	13.49	-1.89	-5.23	8.12	63.3	0	0	1	0
Proline	0.1% formic acid water	0.1% formic acid methanol	50% B isocratic elution	0.124948	0.35	-0.25	3.62	-0.27	-0.99	-4.39	0.18	0	-2.61	25.05	-2.5	2	3	1	8	103	1.11e+16	-251835	-13.13	0.77	147.6	142.26	2.15	0	3.61	94.9	18	192	36.7	4.47	4	3.51	21.36	-3.35	-4.13	3.48	49.3	1	1	1	0
Phenylalanine	0.1% formic acid water	0.1% formic acid methanol	50% B isocratic elution	0.349505	0.2	-0.56	2.97	-0.48	-1.03	-6.1	-0.01	0	-2.56	25.05	-1.5	2	3	3	12	153	1.11e+22	-348280	-15.74	1.01	200.74	208.03	2.32	0	2.66	122	9.49	216	30.8	4.48	4.38	4.16	22.91	-1.94	-2.63	7.78	63.3	0	1	1	0
Methionine	0.1% formic acid water	0.1% formic acid methanol	50% B isocratic elution	-0.237195	-0.05	-0.51	3.26	0.45	-1.09	-5.83	1.14	0	-2.97	25.05	-1.9	2	4	4	9	97	1.11e+19	-502501	-15.83	1.08	186.45	185.96	2.27	0.01	4.25	126	19.1	229	42.1	4.86	4.41	4.94	22.93	-1.51	-3.09	4.05	88.6	0	0	1	1
Tryptophan	0.1% formic acid water	0.1% formic acid methanol	50% B isocratic elution	-0.0801562	-0.2	-1.07	1.74	-1.22	-1.21	-7.11	-0.59	0	-2.5	25.05	-1.1	3	3	3	15	245	1.11e+26	-430876	-21.02	1.24	233.33	250.05	2.4	0	5.34	153	-10.6	271	-20.2	4.73	6.7	4.11	22.25	-1.98	-4.08	5.74	79.1	1	2	2	0
Serine	0.1% formic acid water	0.1% formic acid methanol	50% B isocratic elution	-0.271051	-0.26	-0.36	2.82	0.69	-1.12	-3.73	1.14	0	-3.14	25.05	-3.1	3	4	2	7	72.6	11100000000000	-250467	-14.94	1.06	132.32	122.02	2.09	0	3.06	118	4.07	216	-33.2	4.49	4.85	3.58	19.55	-4.08	-3.26	0.99	83.6	0	0	1	0
Glutamine	0.1% formic acid water	0.1% formic acid methanol	50% B isocratic elution	-0.586987	-0.31	-0.86	1.53	0.48	-1.72	-5.23	1.14	0	-3.7	25.05	-3.1	3	4	4	10	146	1.11e+19	-333835	-24.89	1.35	180.5	176.05	2.25	0	6.95	174	25	351	64	9.61	7.18	5.6	22.19	-3.61	-5.52	7.53	106	0	0	2	0
Threonine	0.1% formic acid water	0.1% formic acid methanol	50% B isocratic elution	-0.210204	-0.16	-0.38	3.49	0.53	-1.16	-4.3	1.14	0	-2.96	25.05	-2.9	3	4	2	8	93.3	1.11e+16	-275147	-14.56	1.14	149.43	144.38	2.16	0.01	4	119	6.4	228	-10.9	5.24	4.98	2.45	17.53	-4.59	-5.42	3.68	83.6	0	0	1	0
Cysteine	0.1% formic acid water	0.1% formic acid methanol	50% B isocratic elution	-0.588839	-0.43	-0.38	3.62	0.37	-0.87	-4.65	1.14	0	-2.79	25.05	-2.5	3	4	2	7	75.3	11100000000000	-453148	-13.45	1	147.18	141.36	2.15	0.01	3.06	108	-15.6	173	-97.6	1.79	4.69	5.27	20.11	-1.25	-3.34	5	64.3	0	0	1	1
Asparagine	0.1% formic acid water	0.1% formic acid methanol	50% B isocratic elution	-0.718959	-0.34	-0.67	2.07	0.63	-1.75	-4.56	1.14	0	-3.89	25.05	-3.4	3	4	3	9	134	1.11e+16	-309157	-24.85	1.33	160.84	155.26	2.19	0	3.88	177	14.7	352	34.5	9.05	7.57	3.77	19.29	-6.05	-4.96	6.4	106	0	0	2	0
Glutamicacid	0.1% formic acid water	0.1% formic acid methanol	50% B isocratic elution	-0.65775	-0.25	-0.73	2.12	0.93	-1.32	-4.9	1.14	0	-3.74	25.05	-3.7	3	5	4	10	145	1.11e+18	-346311	-25.1	1.06	172.73	167.41	2.22	0	8.05	150	9.3	247	-26.7	4.8	5.32	4.16	20.54	-4.48	-4.16	4.84	101	0	0	1	1
Lysine	0.1% formic acid water	0.1% formic acid methanol	50% B isocratic elution	0.0131321	-0.21	-0.79	2.83	1	-1.09	-5.78	1.14	0	-3.43	25.05	-3	3	4	5	10	106	1.11e+23	-312026	-21.17	0.86	191.1	191.01	2.28	0	5.99	127	75.3	255	325	8.64	1.15	8.95	18.74	-1	-1.73	0.96	89.3	0	0	2	0
Arginine	0.1% formic acid water	0.1% formic acid methanol	50% B isocratic elution	0.0466665	0.11	-1.22	1.47	0.68	-1.48	-6.43	1.14	0	-3.73	25.05	-4.2	4	4	5	12	176	1.11e+25	-380778	-28.48	1.38	214.93	214.24	2.33	0	9.11	182	56.4	339	241	10.62	3.9	10.66	22.26	-2.7	-2.93	1.97	128	0	0	4	0
Histidine	0.1% formic acid water	0.1% formic acid methanol	50% B isocratic elution	0.296399	0	-0.87	1.3	0.08	-1.32	-5.34	0.18	0	-3.58	25.05	-3.2	3	4	3	11	151	1.11e+19	-344509	-27.47	0.98	180.91	181.77	2.26	0	5.04	160	36.7	296	139	8.38	4.38	5.7	14.6	-3.9	-4.52	8.26	92	1	1	3	0
Citrulline	0.1% formic acid water	0.1% formic acid methanol	50% B isocratic elution	-0.058852	-0.42	-1.23	1.3	0.37	-2.08	-6.28	1.14	0	-3.96	25.05	-4.3	4	4	5	12	171	1.11e+24	-393268	-29.64	1.53	214.73	215.15	2.33	0	7.6	204	40.5	433	151	12.42	8.36	5.05	24.14	-4.38	-3.03	2.31	118	0	0	3	0
Taurine	0.1% formic acid water	0.1% formic acid methanol	50% B isocratic elution	-1.10348	-0.79	-0.56	3.08	0.76	-1.33	-4.01	1.14	0	-3.48	25.05	-4.1	2	4	2	7	120	11100000000000	-476406	-18.56	1.09	143.51	133.49	2.13	0.01	3.57	138	-7.89	285	-71.8	4.16	6.16	-2.47	10.55	-10.36	-3.86	3.47	88.8	0	0	1	1
Tyrosine	0.1% formic acid water	0.1% formic acid methanol	50% B isocratic elution	-0.00315952	0.04	-1.02	2.22	-0.79	-1.58	-6.22	-0.01	0	-2.88	25.05	-2.3	3	4	3	13	176	1.11e+23	-395507	-20.45	1.27	210.41	219.03	2.34	0	4.34	158	-11.2	301	-58.2	5.35	7.81	4.18	23.28	-2.58	-2.6	8.84	83.6	0	1	1	0
Hypotaurine	0.1% formic acid water	0.1% formic acid methanol	50% B isocratic elution	-0.585636	-0.42	-0.46	3.16	0.62	-1.33	-4.11	1.14	0	-3.43	25.05	-1.5	2	4	2	6	55.5	1110000000000	-429187	-19.14	0.95	136.46	125.99	2.1	0	5.56	129	43.8	272	164	8.05	3.84	8.34	19	-1.9	-2.55	5.19	82.5	0	0	1	1
L-Hydroxyproline	0.1% formic acid water	0.1% formic acid methanol	50% B isocratic elution	-0.193427	-0.05	-0.61	2.82	-0.41	-1.57	-4.49	0.18	0	-3.06	25.05	-3.3	3	4	1	9	125	1.11e+17	-299059	-18.75	1.12	155.95	154.27	2.19	0	3.05	140	34.4	301	118	8.1	5.75	7.9	18.5	-1.19	-2.19	3.72	69.6	1	1	1	0
N-omiga-acetylhistamine	0.1% formic acid water	0.1% formic acid methanol	50% B isocratic elution	0.884076	0.88	-0.99	2.28	-0.19	-1.43	-6.03	0.18	0	-3.36	25.05	-0.4	2	2	3	11	138	1.11e+21	-321960	-23.57	0.83	195.51	194.44	2.29	0	4.66	148	58.4	320	214	11.2	4.88	6.06	14.64	-2.8	-2.61	4.77	57.8	1	1	3	0
L-pyroglutamicacid	0.1% formic acid water	0.1% formic acid methanol	50% B isocratic elution	-0.62232	-0.54	-0.57	2.43	-0.17	-1.38	-4.35	0.18	0	-3.23	25.05	-0.8	2	3	1	9	154	1110000000000000	-298326	-20.95	0.96	151.34	146.44	2.17	0	7.17	137	11.3	267	-26.3	6.36	6.48	3.66	21.17	-4.87	-2.3	6.22	66.4	1	1	1	0
Tyramine	0.1% formic acid water	0.1% formic acid methanol	50% B isocratic elution	0.377296	-0.09	-0.39	3.22	-0.59	-1.03	-5.7	-0.01	0	-2.52	25.05	1.1	2	2	2	10	87.3	1.11e+20	-277120	-13.98	0.82	183.62	181.83	2.26	0	2.6	106	27.2	227	168	5.88	3.52	8.82	18.57	0.95	-2.63	3.17	46.2	0	1	1	0
Histamine	0.1% formic acid water	0.1% formic acid methanol	50% B isocratic elution	0.423735	0.71	-0.67	2.94	-0.16	-1.22	-4.78	0.18	0	-3.06	25.05	-0.7	2	2	2	8	64.7	1.11e+16	-226118	-18.32	0.8	155.19	146.49	2.17	0	4.89	122	68.6	307	360	10.5	2.98	8.7	18.47	-1.26	-2.85	4.92	54.7	1	1	3	0
AaC	0.1% formic acid water	0.1% formic acid methanol	50% B isocratic elution	0.912066	0.63	-0.56	2.2	-1.91	-0.57	-6.68	-1.36	0.01	-1.76	25.05	2.6	2	2	0	14	219	1.11e+22	-369670	-14.85	0.86	210.7	216.51	2.34	0	2.51	108	-19	154	-31.5	2.67	3.95	5.78	12.59	0.02	-2.83	2.59	54.7	2	3	3	0
IQx	0.1% formic acid water	0.1% formic acid methanol	50% B isocratic elution	0.994752	0.62	-0.99	0.96	-1.78	-1.17	-6.74	-1.36	0	-2.32	25.05	0.6	1	4	0	15	246	1.11e+23	-414479	-25.04	0.93	218.25	227.81	2.36	0.01	8.8	141	56.1	274	235	9.64	3.08	5.71	14.84	-2.23	-2.75	8.88	69.6	2	3	5	0
8-MeIQx	0.1% formic acid water	0.1% formic acid methanol	50% B isocratic elution	1.12688	0.67	-1.08	0.92	-1.86	-1.2	-7.38	-1.36	0	-2.24	25.05	1	1	4	0	16	271	1.11e+26	-439162	-25.13	0.98	237.6	249.06	2.4	0.01	7.72	142	63.8	281	265	10.06	2.97	5.88	15.22	-1.59	-1.95	7.78	69.6	2	3	5	0
MeIQ	0.1% formic acid water	0.1% formic acid methanol	50% B isocratic elution	1.2206	0.75	-0.83	1.35	-1.97	-0.87	-7.46	-1.36	0.01	-1.86	25.05	2	1	3	0	16	270	1.11e+27	-429091	-21.18	0.93	236.91	253.92	2.4	0	9.17	124	38.5	216	166	7.22	2.74	7.22	16.13	0.27	-4.33	9.28	56.7	2	3	4	0
IQ[4,5-b]	0.1% formic acid water	0.1% formic acid methanol	50% B isocratic elution	0.966905	0.68	-1.04	0.7	-1.85	-1.14	-6.99	-1.36	0	-2.35	25.05	1.7	1	3	0	15	245	1.11e+24	-404413	-27.45	0.9	223.43	232.81	2.37	0	10.84	139	39.2	269	182	8.87	4.02	6.83	16.69	-0.82	-4.58	11	56.7	2	3	4	0
Harman	0.1% formic acid water	0.1% formic acid methanol	50% B isocratic elution	1.35916	0.9	-0.15	2.69	-1.88	-0.49	-6.88	-1.36	0.01	-1.58	25.05	3.6	1	1	0	14	216	1.11e+23	-359587	-12.73	0.59	214.44	223.28	2.35	0	4.55	81.6	10	132	63.3	3.7	2.33	7.72	16.34	1.94	-4.95	4.58	28.7	2	3	2	0
IQ	0.1% formic acid water	0.1% formic acid methanol	50% B isocratic elution	1.11947	0.87	-0.77	1.43	-1.93	-0.85	-6.98	-1.36	0	-1.93	25.05	1.5	1	3	0	15	245	1.11e+24	-404413	-20.86	0.92	222.22	233.02	2.37	0	8.83	123	32.7	213	148	6.9	2.78	7	15.75	-0.15	-2.69	8.95	56.7	2	3	4	0
Norharman	0.1% formic acid water	0.1% formic acid methanol	50% B isocratic elution	1.16465	0.81	-0.27	2.73	-1.82	-0.56	-6.28	-1.36	0.01	-1.76	25.05	3.2	1	1	0	13	193	1.11e+20	-334905	-13.23	0.56	196.55	201.82	2.3	0	4.61	85.1	3.38	142	46.2	3.74	2.88	7.61	16.32	1.37	-4.84	4.64	28.7	2	3	2	0
DMIP	0.1% formic acid water	0.1% formic acid methanol	50% B isocratic elution	1.2217	0.83	-0.92	1.51	-0.95	-1.2	-6.06	-0.59	0	-2.73	25.05	1	1	3	0	12	172	1.11e+21	-332645	-25.27	0.81	195.56	198.01	2.3	0.01	9.99	128	57.4	269	243	9.75	3.19	7.16	17.5	-1.15	-4.24	10.15	56.7	2	2	4	0
Phe-p-1	0.1% formic acid water	0.1% formic acid methanol	50% B isocratic elution	1.38283	0.93	-0.22	2.74	-1.64	-0.47	-6.68	-1.16	0.01	-1.71	25.05	2.3	1	2	1	13	152	1.11e+22	-335660	-12.87	0.73	209.56	213.73	2.33	0	3.22	91.3	4.88	123	51	3.16	1.78	7	14.9	1.32	-6	3.7	38.9	1	2	2	0
7,8-DiMeIQx	0.1% formic acid water	0.1% formic acid methanol	50% B isocratic elution	1.06553	0.76	-1.14	0.84	-1.95	-1.21	-7.94	-1.36	0	-2.15	25.05	1.4	1	4	0	17	297	1.11e+29	-463843	-25.35	1.03	254.55	269.67	2.43	0.01	6.62	143	68.9	284	281	10.44	2.87	6.01	15.48	-1.09	-4.51	6.74	69.6	2	3	5	0
Sarcosine	0.1% formic acid water	0.1% formic acid methanol	50% B isocratic elution	-0.346208	-0.16	-0.15	4.28	0.75	-1.02	-3.74	1.14	0	-3.03	25.05	-2.8	2	3	2	6	52.8	1110000000000	-203238	-12.38	0.78	127.98	113.01	2.05	0	2.92	94.2	17.5	201	42.4	4.57	4.19	4.37	24.65	-2.74	-4.93	8.22	49.3	0	0	1	0
Creatinine	0.1% formic acid water	0.1% formic acid methanol	50% B isocratic elution	0.614464	0.58	-0.7	1.29	-0.03	-1.53	-4.33	0.18	0	-3.65	25.05	-1.8	1	1	0	8	151	111000000000000	-248681	-30.05	0.8	143.83	134.46	2.13	0	11.98	146	74.4	333	274	12.86	4.35	5.11	15.98	-5.3	-5.49	12.08	58.7	1	1	3	0
L-dihydrooroticacid	0.1% formic acid water	0.1% formic acid methanol	50% B isocratic elution	-1.72899	-2.18	-0.73	1.72	-0.45	-1.6	-4.65	-0.01	0	-3.31	25.05	-1.5	3	4	1	11	225	1.11e+16	-379565	-23.86	1.38	167.39	163.4	2.21	0.01	5.18	172	-17.2	327	-144	5.51	8.7	2.35	17.25	-6.68	-4.92	4.87	95.5	1	1	2	0
L-Carnosine	0.1% formic acid water	0.1% formic acid methanol	50% B isocratic elution	0.151483	-0.16	-1.67	-0.26	-0.6	-2.37	-7.52	0.18	0	-3.86	25.05	-4	4	5	6	16	259	1.11e+29	-499765	-38.44	1.62	256.29	270.05	2.43	0	12.99	233	51	527	223	14.27	9.82	9.18	20.43	-2.61	-2.2	9.07	121	1	1	4	0
Betaine	0.1% formic acid water	0.1% formic acid methanol	50% B isocratic elution	0.703808	0.53	-1.58	-0.47	1.1	-2.13	-4.67	1.14	0	-4.78	25.05	0.5	0	2	1	8	87.6	1.11e+18	-252565	-41.59	0.81	153.39	154.86	2.19	0	15.35	178	181	468	789	21.46	0.08	1.63	14.25	-9.97	-2.66	15.47	40.1	0	0	1	0
Cytosine	0.1% formic acid water	0.1% formic acid methanol	50% B isocratic elution	0.553074	0.31	-0.3	0.33	-0.66	-1.87	-4.1	-0.01	0	-3.74	25.05	-1.7	2	2	0	8	170	1110000000000	-247927	-34.38	0.87	136.73	126.12	2.1	0	12.89	167	25.9	432	122	12.95	9.67	6.77	18.33	-4	-2.61	13.02	67.5	1	1	3	0
Hypoxanthine	0.1% formic acid water	0.1% formic acid methanol	50% B isocratic elution	-0.0418391	0.07	-0.46	1.31	-0.98	-1.49	-4.43	-0.59	0	-3.23	25.05	-0.5	2	3	0	10	190	11100000000000	-305849	-25.27	0.97	150.2	143.93	2.16	0.01	2.51	159	5.76	351	-26.8	8.83	8.14	3.33	11.33	-6.92	-2.86	2.6	70.1	2	2	4	0
Xanthine	0.1% formic acid water	0.1% formic acid methanol	50% B isocratic elution	-0.534664	-0.27	-0.57	1.37	-1.1	-1.47	-4.68	-0.59	0	-3.07	25.05	-0.7	3	3	0	11	217	111000000000000	-353097	-23.72	1.25	159.89	153.96	2.19	0.01	6.06	170	-15.1	367	-128	7.64	10.2	7.74	22.93	-2.99	-2.73	6.1	86.9	2	2	4	0
Guanine	0.1% formic acid water	0.1% formic acid methanol	50% B isocratic elution	0.0856494	0.12	-0.64	0.35	-1.27	-1.86	-4.84	-0.59	0	-3.43	25.05	-1.1	3	3	0	11	225	1110000000000000	-340610	-30.43	1.22	164.42	158.81	2.2	0.01	3.28	191	-7.34	441	-50.1	10.78	11.63	4.81	13.86	-5.99	-2.81	3.34	96.2	2	2	5	0
Adenine	0.1% formic acid water	0.1% formic acid methanol	50% B isocratic elution	0.992283	0.41	-0.7	0.65	-1.2	-1.6	-4.6	-0.59	0	-3.15	25.05	-0.1	2	4	0	10	127	111000000000000	-293365	-30.51	0.99	153.88	148.09	2.17	0	11.17	161	9.31	380	47.5	10.2	8.73	5.5	15	-4.52	-2.45	11.33	80.5	2	2	5	0
Beta-Thymidine	0.1% formic acid water	0.1% formic acid methanol	50% B isocratic elution	-1.18056	-1.8	-1.28	1.16	-1.6	-1.53	-7.34	-0.97	0	-2.6	25.05	-1.2	3	5	2	17	381	1.11e+30	-549390	-24.52	1.42	246.36	266.66	2.43	0.01	4.01	176	50.1	310	96.6	9.28	5.39	15.53	45.1	-0.93	-3.96	6.43	99.1	1	2	2	0
Cytidine	0.1% formic acid water	0.1% formic acid methanol	50% B isocratic elution	-0.46699	-0.94	-1.6	-2.05	-2.06	-2.32	-7.04	-0.97	0	-3.1	25.05	-2.1	4	5	2	17	383	1.11e+29	-559442	-33.42	1.74	241.37	261.47	2.42	0.01	6.86	228	40.6	467	146	13.35	9.24	15.82	45.67	-2.4	-3.46	9.4	129	1	2	3	0
Inosine	0.1% formic acid water	0.1% formic acid methanol	50% B isocratic elution	-1.26771	-1.27	-1.79	-1.34	-2.54	-2.37	-7.53	-1.55	0	-2.99	25.05	-1.3	4	7	2	19	405	1.11e+30	-617361	-37.38	1.8	261.27	285.84	2.46	0.01	9.42	243	21.5	459	3.18	11.36	10.23	10.31	29.87	-2.75	-2.08	9.18	129	2	3	4	0
Xanthosine	0.1% formic acid water	0.1% formic acid methanol	50% B isocratic elution	-1.14907	-1.24	-1.77	-1.92	-2.41	-2.32	-7.6	-1.55	0	-2.9	25.05	-2.4	5	7	2	20	434	1.11e+31	-664603	-37.75	1.91	265.99	291.82	2.47	0.01	15.45	240	28.5	439	14	11	9.33	12.24	32.43	-2.45	-3.34	12.18	146	2	3	4	0
Guanosine	0.1% formic acid water	0.1% formic acid methanol	50% B isocratic elution	-0.868551	-0.69	-2.04	-2.39	-2.88	-2.63	-7.97	-1.55	0	-3.07	25.05	-1.9	5	7	2	20	446	1.11e+32	-652123	-42.64	2.09	276.17	298.73	2.48	0.01	11.43	271	-5.63	543	-85.9	12.26	14.35	13.14	36.02	-2.86	-2.22	11.13	155	2	3	5	0
Uridine	0.1% formic acid water	0.1% formic acid methanol	50% B isocratic elution	-1.37357	-1.09	-1.33	-0.25	-1.56	-1.56	-6.82	-0.97	0	-2.67	25.05	-2	4	6	2	17	371	1.11e+28	-571934	-25.98	1.71	235.87	256.94	2.41	0.01	5.57	194	28.6	328	37.3	8.29	6.3	11.64	34.25	-0.98	-1.56	4.28	119	1	2	2	0
Adenosine	0.1% formic acid water	0.1% formic acid methanol	50% B isocratic elution	-0.22344	-0.14	-1.42	0.66	-2.36	-1.46	-7.51	-1.55	0	-2.04	25.05	-1.1	4	8	2	19	335	1.11e+31	-604889	-23.66	1.73	253.58	283.19	2.45	0.01	2.18	191	36.3	322	107	8.99	5.54	14.19	39.95	-0.74	-3.53	3.84	140	2	3	5	0
D-Pantothenic acid	0.1% formic acid water	0.1% formic acid methanol	65% B isocratic elution	-1.03159	-0.8	-1.45	1.6	-0.27	-1.87	-7.43	1.14	0	-3.34	27.15	-1.1	4	5	6	15	239	1.11e+31	-492236	-26.02	1.56	247.96	269.32	2.43	0	7.46	186	7.26	354	-39.4	8.13	8.95	6.22	23.15	-1.05	-7.18	4.69	107	0	0	1	0
niacinamide	0.1% formic acid water	0.1% formic acid methanol	65% B isocratic elution	0.754196	0.21	-0.43	3.02	-0.45	-0.87	-4.73	-0.01	0	-2.8	27.15	-0.4	1	2	1	9	114	111000000000000	-261773	-16.8	0.79	152.74	146.35	2.17	0	2.95	112	27.7	215	95.8	7.01	3.68	5.08	12.91	-3.24	-5.1	4.94	56	1	1	2	0
Pyridoxal	0.1% formic acid water	0.1% formic acid methanol	65% B isocratic elution	0.521706	0.12	-0.63	2.47	-0.94	-1.12	-5.71	-0.01	0	-2.48	27.15	0	2	4	2	12	162	1.11e+20	-370806	-16.87	1.08	190.02	193.09	2.29	0.01	3.53	121	8.31	226	-19.7	4.94	5.51	5.04	18.08	-1.4	-2.71	3.58	70.4	1	1	1	0
Pyridoxine	0.1% formic acid water	0.1% formic acid methanol	65% B isocratic elution	1.00913	0.74	-0.89	1.77	-1.1	-1.35	-5.87	-0.01	0	-2.71	27.15	-0.8	3	4	2	12	142	1.11e+22	-371565	-22.39	1.06	195.11	198.18	2.3	0	9.44	137	11.5	264	32	6.46	6.06	11.25	32	0.01	-3.22	2.9	73.6	1	1	1	0
Pyridoxamine	0.1% formic acid water	0.1% formic acid methanol	65% B isocratic elution	1.00968	0.63	-0.82	2.14	-1.04	-1.41	-6.03	-0.01	0	-2.66	27.15	-1	3	4	2	12	143	1.11e+23	-359090	-19.85	1.23	199.15	205.79	2.31	0.01	2.37	144	49.5	321	233	9.73	4.96	8.51	18.04	-0.23	-3.37	4.35	79.4	1	1	2	0
Thiamine	0.1% formic acid water	0.1% formic acid methanol	65% B isocratic elution	0.801588	0.43	0	0	-1.12	-1.34	-9.35	-0.97	0	-3.25	27.15	0	2	6	4	19	269	1.11e+34	-727954	-65.42	1.49	291.55	320.17	2.51	-0.99	0	200	-71.2	335	-70.9	6.56	7.95	14.5	36.27	1.75	-2.99	10.15	104	2	2	4	1
Nicotinicacid	0.1% formic acid water	0.1% formic acid methanol	65% B isocratic elution	0.174196	0.27	-0.22	3.56	-0.65	-0.87	-4.47	-0.01	0	-2.41	27.15	0.4	1	3	1	9	114	11100000000000	-274248	-12.08	0.77	149.15	142	2.15	0	0.88	92.9	1.16	177	-39.1	3.37	4.37	3.73	20.67	-2.73	-2.8	3.67	50.2	1	1	1	0
Alanine	0.1% formic acid water	0.1% formic acid methanol	65% B isocratic elution	-0.275393	-0.15	-0.24	3.79	0.65	-1.01	-3.62	1.14	0	-3.06	27.15	-3	2	3	1	6	61.8	1110000000000	-203245	-12.07	0.88	123.86	112.49	2.05	0	1.93	103	20.6	223	81.1	5.25	4.15	6.92	15.51	-0.69	-4.07	2.88	63.3	0	0	1	0
Leucine	0.1% formic acid water	0.1% formic acid methanol	65% B isocratic elution	0.233318	0.28	-0.29	3.98	0.31	-0.88	-5.4	1.14	0	-2.69	27.15	-1.5	2	3	3	9	101	1.11e+21	-277279	-11.49	0.91	176.64	178.51	2.25	0	1.75	97.3	10	188	15.9	4.1	4.03	4.32	23.12	-1.46	-4.42	4.6	63.3	0	0	1	0
Isoleucine	0.1% formic acid water	0.1% formic acid methanol	65% B isocratic elution	0.346292	0.29	-0.29	3.99	0.28	-0.85	-5.35	1.14	0	-2.66	27.15	-1.7	2	3	3	9	103	1.11e+21	-277278	-11.39	0.9	174.76	177.8	2.25	0	1.86	95.2	4.07	178	-13.2	3.66	4.06	5.29	24.73	-0.48	-4.81	8.21	63.3	0	0	1	0
Valine	0.1% formic acid water	0.1% formic acid methanol	65% B isocratic elution	0.426668	0.16	-0.35	3.48	0.99	-0.56	-4.74	1.14	0	-3.09	27.15	-2.3	2	3	2	8	90.4	1.11e+18	-252603	-16.64	0.58	154.87	154.22	2.19	0	7.95	86.9	30.2	126	74.6	3.87	1.16	5.48	13.49	-1.89	-5.23	8.12	63.3	0	0	1	0
Proline	0.1% formic acid water	0.1% formic acid methanol	65% B isocratic elution	0.116695	0.33	-0.31	3.62	-0.4	-0.92	-4.44	0.18	0	-2.61	27.15	-2.5	2	3	1	8	103	1.11e+16	-251835	-13.13	0.77	147.6	142.26	2.15	0	3.61	94.9	18	192	36.7	4.47	4	3.51	21.36	-3.35	-4.13	3.48	49.3	1	1	1	0
Phenylalanine	0.1% formic acid water	0.1% formic acid methanol	65% B isocratic elution	0.374178	0.21	-0.64	2.97	-0.71	-0.95	-6.16	-0.01	0	-2.55	27.15	-1.5	2	3	3	12	153	1.11e+22	-348280	-15.74	1.01	200.74	208.03	2.32	0	2.66	122	9.49	216	30.8	4.48	4.38	4.16	22.91	-1.94	-2.63	7.78	63.3	0	1	1	0
Methionine	0.1% formic acid water	0.1% formic acid methanol	65% B isocratic elution	-0.240117	-0.06	-0.59	3.26	0.27	-1.01	-5.9	1.14	0	-2.96	27.15	-1.9	2	4	4	9	97	1.11e+19	-502501	-15.83	1.08	186.45	185.96	2.27	0.01	4.25	126	19.1	229	42.1	4.86	4.41	4.94	22.93	-1.51	-3.09	4.05	88.6	0	0	1	1
Tryptophan	0.1% formic acid water	0.1% formic acid methanol	65% B isocratic elution	-0.0692088	-0.2	-1.12	1.74	-1.46	-1.13	-7.19	-0.59	0	-2.51	27.15	-1.1	3	3	3	15	245	1.11e+26	-430876	-21.02	1.24	233.33	250.05	2.4	0	5.34	153	-10.6	271	-20.2	4.73	6.7	4.11	22.25	-1.98	-4.08	5.74	79.1	1	2	2	0
Serine	0.1% formic acid water	0.1% formic acid methanol	65% B isocratic elution	-0.297628	-0.25	-0.37	2.82	0.64	-1.04	-3.78	1.14	0	-3.16	27.15	-3.1	3	4	2	7	72.6	11100000000000	-250467	-14.94	1.06	132.32	122.02	2.09	0	3.06	118	4.07	216	-33.2	4.49	4.85	3.58	19.55	-4.08	-3.26	0.99	83.6	0	0	1	0
Glutamine	0.1% formic acid water	0.1% formic acid methanol	65% B isocratic elution	-0.604449	-0.31	-0.77	1.53	0.5	-1.59	-5.28	1.14	0	-3.77	27.15	-3.1	3	4	4	10	146	1.11e+19	-333835	-24.89	1.35	180.5	176.05	2.25	0	6.95	174	25	351	64	9.61	7.18	5.6	22.19	-3.61	-5.52	7.53	106	0	0	2	0
Threonine	0.1% formic acid water	0.1% formic acid methanol	65% B isocratic elution	-0.211173	-0.17	-0.44	3.49	0.41	-1.07	-4.35	1.14	0	-2.96	27.15	-2.9	3	4	2	8	93.3	1.11e+16	-275147	-14.56	1.14	149.43	144.38	2.16	0.01	4	119	6.4	228	-10.9	5.24	4.98	2.45	17.53	-4.59	-5.42	3.68	83.6	0	0	1	0
Cysteine	0.1% formic acid water	0.1% formic acid methanol	65% B isocratic elution	-0.598245	-0.46	-0.45	3.62	0.22	-0.81	-4.7	1.14	0	-2.79	27.15	-2.5	3	4	2	7	75.3	11100000000000	-453148	-13.45	1	147.18	141.36	2.15	0.01	3.06	108	-15.6	173	-97.6	1.79	4.69	5.27	20.11	-1.25	-3.34	5	64.3	0	0	1	1
Asparagine	0.1% formic acid water	0.1% formic acid methanol	65% B isocratic elution	-0.744035	-0.34	-0.52	2.07	0.71	-1.61	-4.61	1.14	0	-3.98	27.15	-3.4	3	4	3	9	134	1.11e+16	-309157	-24.85	1.33	160.84	155.26	2.19	0	3.88	177	14.7	352	34.5	9.05	7.57	3.77	19.29	-6.05	-4.96	6.4	106	0	0	2	0
Glutamicacid	0.1% formic acid water	0.1% formic acid methanol	65% B isocratic elution	-0.682868	-0.26	-0.65	2.12	0.92	-1.22	-4.96	1.14	0	-3.79	27.15	-3.7	3	5	4	10	145	1.11e+18	-346311	-25.1	1.06	172.73	167.41	2.22	0	8.05	150	9.3	247	-26.7	4.8	5.32	4.16	20.54	-4.48	-4.16	4.84	101	0	0	1	1
Lysine	0.1% formic acid water	0.1% formic acid methanol	65% B isocratic elution	0.0196345	-0.22	-0.79	2.83	0.9	-0.99	-5.83	1.14	0	-3.45	27.15	-3	3	4	5	10	106	1.11e+23	-312026	-21.17	0.86	191.1	191.01	2.28	0	5.99	127	75.3	255	325	8.64	1.15	8.95	18.74	-1	-1.73	0.96	89.3	0	0	2	0
Arginine	0.1% formic acid water	0.1% formic acid methanol	65% B isocratic elution	0.0349464	0.08	-1.12	1.47	0.67	-1.35	-6.49	1.14	0	-3.8	27.15	-4.2	4	4	5	12	176	1.11e+25	-380778	-28.48	1.38	214.93	214.24	2.33	0	9.11	182	56.4	339	241	10.62	3.9	10.66	22.26	-2.7	-2.93	1.97	128	0	0	4	0
Histidine	0.1% formic acid water	0.1% formic acid methanol	65% B isocratic elution	0.257917	-0.02	-0.73	1.3	0.12	-1.21	-5.4	0.18	0	-3.67	27.15	-3.2	3	4	3	11	151	1.11e+19	-344509	-27.47	0.98	180.91	181.77	2.26	0	5.04	160	36.7	296	139	8.38	4.38	5.7	14.6	-3.9	-4.52	8.26	92	1	1	3	0
Citrulline	0.1% formic acid water	0.1% formic acid methanol	65% B isocratic elution	-0.0567886	-0.42	-1.1	1.3	0.38	-1.92	-6.34	1.14	0	-4.04	27.15	-4.3	4	4	5	12	171	1.11e+24	-393268	-29.64	1.53	214.73	215.15	2.33	0	7.6	204	40.5	433	151	12.42	8.36	5.05	24.14	-4.38	-3.03	2.31	118	0	0	3	0
Taurine	0.1% formic acid water	0.1% formic acid methanol	65% B isocratic elution	-1.14303	-0.83	-0.52	3.08	0.74	-1.24	-4.07	1.14	0	-3.53	27.15	-4.1	2	4	2	7	120	11100000000000	-476406	-18.56	1.09	143.51	133.49	2.13	0.01	3.57	138	-7.89	285	-71.8	4.16	6.16	-2.47	10.55	-10.36	-3.86	3.47	88.8	0	0	1	1
Tyrosine	0.1% formic acid water	0.1% formic acid methanol	65% B isocratic elution	-0.00105587	0.01	-1.04	2.22	-0.95	-1.47	-6.3	-0.01	0	-2.9	27.15	-2.3	3	4	3	13	176	1.11e+23	-395507	-20.45	1.27	210.41	219.03	2.34	0	4.34	158	-11.2	301	-58.2	5.35	7.81	4.18	23.28	-2.58	-2.6	8.84	83.6	0	1	1	0
Hypotaurine	0.1% formic acid water	0.1% formic acid methanol	65% B isocratic elution	-0.616495	-0.43	-0.39	3.16	0.64	-1.23	-4.16	1.14	0	-3.48	27.15	-1.5	2	4	2	6	55.5	1110000000000	-429187	-19.14	0.95	136.46	125.99	2.1	0	5.56	129	43.8	272	164	8.05	3.84	8.34	19	-1.9	-2.55	5.19	82.5	0	0	1	1
L-Hydroxyproline	0.1% formic acid water	0.1% formic acid methanol	65% B isocratic elution	-0.209407	-0.05	-0.57	2.82	-0.44	-1.46	-4.54	0.18	0	-3.11	27.15	-3.3	3	4	1	9	125	1.11e+17	-299059	-18.75	1.12	155.95	154.27	2.19	0	3.05	140	34.4	301	118	8.1	5.75	7.9	18.5	-1.19	-2.19	3.72	69.6	1	1	1	0
N-omiga-acetylhistamine	0.1% formic acid water	0.1% formic acid methanol	65% B isocratic elution	0.869627	0.9	-0.92	2.28	-0.22	-1.31	-6.09	0.18	0	-3.42	27.15	-0.4	2	2	3	11	138	1.11e+21	-321960	-23.57	0.83	195.51	194.44	2.29	0	4.66	148	58.4	320	214	11.2	4.88	6.06	14.64	-2.8	-2.61	4.77	57.8	1	1	3	0
L-pyroglutamicacid	0.1% formic acid water	0.1% formic acid methanol	65% B isocratic elution	-0.648805	-0.57	-0.51	2.43	-0.17	-1.28	-4.4	0.18	0	-3.28	27.15	-0.8	2	3	1	9	154	1110000000000000	-298326	-20.95	0.96	151.34	146.44	2.17	0	7.17	137	11.3	267	-26.3	6.36	6.48	3.66	21.17	-4.87	-2.3	6.22	66.4	1	1	1	0
Tyramine	0.1% formic acid water	0.1% formic acid methanol	65% B isocratic elution	0.390699	-0.13	-0.48	3.22	-0.79	-0.96	-5.75	-0.01	0	-2.51	27.15	1.1	2	2	2	10	87.3	1.11e+20	-277120	-13.98	0.82	183.62	181.83	2.26	0	2.6	106	27.2	227	168	5.88	3.52	8.82	18.57	0.95	-2.63	3.17	46.2	0	1	1	0
Histamine	0.1% formic acid water	0.1% formic acid methanol	65% B isocratic elution	0.410967	0.71	-0.63	2.94	-0.19	-1.12	-4.82	0.18	0	-3.11	27.15	-0.7	2	2	2	8	64.7	1.11e+16	-226118	-18.32	0.8	155.19	146.49	2.17	0	4.89	122	68.6	307	360	10.5	2.98	8.7	18.47	-1.26	-2.85	4.92	54.7	1	1	3	0
AaC	0.1% formic acid water	0.1% formic acid methanol	65% B isocratic elution	0.934105	0.6	-0.68	2.2	-2.2	-0.53	-6.74	-1.36	0.01	-1.73	27.15	2.6	2	2	0	14	219	1.11e+22	-369670	-14.85	0.86	210.7	216.51	2.34	0	2.51	108	-19	154	-31.5	2.67	3.95	5.78	12.59	0.02	-2.83	2.59	54.7	2	3	3	0
IQx	0.1% formic acid water	0.1% formic acid methanol	65% B isocratic elution	1.00918	0.59	-0.97	0.96	-1.92	-1.07	-6.8	-1.36	0	-2.35	27.15	0.6	1	4	0	15	246	1.11e+23	-414479	-25.04	0.93	218.25	227.81	2.36	0.01	8.8	141	56.1	274	235	9.64	3.08	5.71	14.84	-2.23	-2.75	8.88	69.6	2	3	5	0
8-MeIQx	0.1% formic acid water	0.1% formic acid methanol	65% B isocratic elution	1.14903	0.62	-1.1	0.92	-2.05	-1.09	-7.45	-1.36	0	-2.26	27.15	1	1	4	0	16	271	1.11e+26	-439162	-25.13	0.98	237.6	249.06	2.4	0.01	7.72	142	63.8	281	265	10.06	2.97	5.88	15.22	-1.59	-1.95	7.78	69.6	2	3	5	0
MeIQ	0.1% formic acid water	0.1% formic acid methanol	65% B isocratic elution	1.24845	0.81	-0.92	1.35	-2.24	-0.79	-7.53	-1.36	0.01	-1.85	27.15	2	1	3	0	16	270	1.11e+27	-429091	-21.18	0.93	236.91	253.92	2.4	0	9.17	124	38.5	216	166	7.22	2.74	7.22	16.13	0.27	-4.33	9.28	56.7	2	3	4	0
IQ[4,5-b]	0.1% formic acid water	0.1% formic acid methanol	65% B isocratic elution	0.980779	0.63	-1.04	0.7	-2.02	-1.05	-7.05	-1.36	0	-2.38	27.15	1.7	1	3	0	15	245	1.11e+24	-404413	-27.45	0.9	223.43	232.81	2.37	0	10.84	139	39.2	269	182	8.87	4.02	6.83	16.69	-0.82	-4.58	11	56.7	2	3	4	0
Harman	0.1% formic acid water	0.1% formic acid methanol	65% B isocratic elution	1.3856	0.87	-0.33	2.69	-2.23	-0.45	-6.95	-1.36	0.01	-1.53	27.15	3.6	1	1	0	14	216	1.11e+23	-359587	-12.73	0.59	214.44	223.28	2.35	0	4.55	81.6	10	132	63.3	3.7	2.33	7.72	16.34	1.94	-4.95	4.58	28.7	2	3	2	0
IQ	0.1% formic acid water	0.1% formic acid methanol	65% B isocratic elution	1.13381	0.96	-0.84	1.43	-2.16	-0.77	-7.05	-1.36	0	-1.93	27.15	1.5	1	3	0	15	245	1.11e+24	-404413	-20.86	0.92	222.22	233.02	2.37	0	8.83	123	32.7	213	148	6.9	2.78	7	15.75	-0.15	-2.69	8.95	56.7	2	3	4	0
Norharman	0.1% formic acid water	0.1% formic acid methanol	65% B isocratic elution	1.18528	0.82	-0.4	2.73	-2.1	-0.51	-6.34	-1.36	0.01	-1.73	27.15	3.2	1	1	0	13	193	1.11e+20	-334905	-13.23	0.56	196.55	201.82	2.3	0	4.61	85.1	3.38	142	46.2	3.74	2.88	7.61	16.32	1.37	-4.84	4.64	28.7	2	3	2	0
DMIP	0.1% formic acid water	0.1% formic acid methanol	65% B isocratic elution	1.22818	0.87	-0.89	1.51	-1.05	-1.1	-6.11	-0.59	0	-2.77	27.15	1	1	3	0	12	172	1.11e+21	-332645	-25.27	0.81	195.56	198.01	2.3	0.01	9.99	128	57.4	269	243	9.75	3.19	7.16	17.5	-1.15	-4.24	10.15	56.7	2	2	4	0
Phe-p-1	0.1% formic acid water	0.1% formic acid methanol	65% B isocratic elution	1.4045	0.9	-0.38	2.74	-1.95	-0.43	-6.74	-1.16	0.01	-1.67	27.15	2.3	1	2	1	13	152	1.11e+22	-335660	-12.87	0.73	209.56	213.73	2.33	0	3.22	91.3	4.88	123	51	3.16	1.78	7	14.9	1.32	-6	3.7	38.9	1	2	2	0
7,8-DiMeIQx	0.1% formic acid water	0.1% formic acid methanol	65% B isocratic elution	1.09722	0.69	-1.18	0.84	-2.18	-1.1	-8.02	-1.36	0	-2.15	27.15	1.4	1	4	0	17	297	1.11e+29	-463843	-25.35	1.03	254.55	269.67	2.43	0.01	6.62	143	68.9	284	281	10.44	2.87	6.01	15.48	-1.09	-4.51	6.74	69.6	2	3	5	0
Sarcosine	0.1% formic acid water	0.1% formic acid methanol	65% B isocratic elution	-0.362399	-0.15	-0.2	4.28	0.66	-0.95	-3.78	1.14	0	-3.04	27.15	-2.8	2	3	2	6	52.8	1110000000000	-203238	-12.38	0.78	127.98	113.01	2.05	0	2.92	94.2	17.5	201	42.4	4.57	4.19	4.37	24.65	-2.74	-4.93	8.22	49.3	0	0	1	0
Creatinine	0.1% formic acid water	0.1% formic acid methanol	65% B isocratic elution	0.578486	0.61	-0.52	1.29	0.1	-1.4	-4.37	0.18	0	-3.75	27.15	-1.8	1	1	0	8	151	111000000000000	-248681	-30.05	0.8	143.83	134.46	2.13	0	11.98	146	74.4	333	274	12.86	4.35	5.11	15.98	-5.3	-5.49	12.08	58.7	1	1	3	0
L-dihydrooroticacid	0.1% formic acid water	0.1% formic acid methanol	65% B isocratic elution	-1.76865	-2.18	-0.62	1.72	-0.43	-1.49	-4.72	-0.01	0	-3.38	27.15	-1.5	3	4	1	11	225	1.11e+16	-379565	-23.86	1.38	167.39	163.4	2.21	0.01	5.18	172	-17.2	327	-144	5.51	8.7	2.35	17.25	-6.68	-4.92	4.87	95.5	1	1	2	0
L-Carnosine	0.1% formic acid water	0.1% formic acid methanol	65% B isocratic elution	0.148473	-0.13	-1.49	-0.26	-0.6	-2.19	-7.61	0.18	0	-3.96	27.15	-4	4	5	6	16	259	1.11e+29	-499765	-38.44	1.62	256.29	270.05	2.43	0	12.99	233	51	527	223	14.27	9.82	9.18	20.43	-2.61	-2.2	9.07	121	1	1	4	0
Betaine	0.1% formic acid water	0.1% formic acid methanol	65% B isocratic elution	0.651939	0.45	-1.26	-0.47	1.36	-1.96	-4.71	1.14	0	-4.95	27.15	0.5	0	2	1	8	87.6	1.11e+18	-252565	-41.59	0.81	153.39	154.86	2.19	0	15.35	178	181	468	789	21.46	0.08	1.63	14.25	-9.97	-2.66	15.47	40.1	0	0	1	0
Cytosine	0.1% formic acid water	0.1% formic acid methanol	65% B isocratic elution	0.512264	0.32	-0.06	0.33	-0.49	-1.73	-4.14	-0.01	0	-3.87	27.15	-1.7	2	2	0	8	170	1110000000000	-247927	-34.38	0.87	136.73	126.12	2.1	0	12.89	167	25.9	432	122	12.95	9.67	6.77	18.33	-4	-2.61	13.02	67.5	1	1	3	0
Hypoxanthine	0.1% formic acid water	0.1% formic acid methanol	65% B isocratic elution	-0.0886992	0.05	-0.29	1.31	-0.88	-1.37	-4.48	-0.59	0	-3.34	27.15	-0.5	2	3	0	10	190	11100000000000	-305849	-25.27	0.97	150.2	143.93	2.16	0.01	2.51	159	5.76	351	-26.8	8.83	8.14	3.33	11.33	-6.92	-2.86	2.6	70.1	2	2	4	0
Xanthine	0.1% formic acid water	0.1% formic acid methanol	65% B isocratic elution	-0.557889	-0.3	-0.43	1.37	-1.05	-1.35	-4.73	-0.59	0	-3.15	27.15	-0.7	3	3	0	11	217	111000000000000	-353097	-23.72	1.25	159.89	153.96	2.19	0.01	6.06	170	-15.1	367	-128	7.64	10.2	7.74	22.93	-2.99	-2.73	6.1	86.9	2	2	4	0
Guanine	0.1% formic acid water	0.1% formic acid methanol	65% B isocratic elution	0.0480166	0.1	-0.41	0.35	-1.14	-1.72	-4.89	-0.59	0	-3.56	27.15	-1.1	3	3	0	11	225	1110000000000000	-340610	-30.43	1.22	164.42	158.81	2.2	0.01	3.28	191	-7.34	441	-50.1	10.78	11.63	4.81	13.86	-5.99	-2.81	3.34	96.2	2	2	5	0
Adenine	0.1% formic acid water	0.1% formic acid methanol	65% B isocratic elution	0.961704	0.4	-0.53	0.65	-1.12	-1.48	-4.64	-0.59	0	-3.26	27.15	-0.1	2	4	0	10	127	111000000000000	-293365	-30.51	0.99	153.88	148.09	2.17	0	11.17	161	9.31	380	47.5	10.2	8.73	5.5	15	-4.52	-2.45	11.33	80.5	2	2	5	0
Beta-Thymidine	0.1% formic acid water	0.1% formic acid methanol	65% B isocratic elution	-1.16959	-1.81	-1.28	1.16	-1.75	-1.4	-7.42	-0.97	0	-2.63	27.15	-1.2	3	5	2	17	381	1.11e+30	-549390	-24.52	1.42	246.36	266.66	2.43	0.01	4.01	176	50.1	310	96.6	9.28	5.39	15.53	45.1	-0.93	-3.96	6.43	99.1	1	2	2	0
Cytidine	0.1% formic acid water	0.1% formic acid methanol	65% B isocratic elution	-0.469353	-0.94	-1.44	-2.05	-2.07	-2.15	-7.12	-0.97	0	-3.2	27.15	-2.1	4	5	2	17	383	1.11e+29	-559442	-33.42	1.74	241.37	261.47	2.42	0.01	6.86	228	40.6	467	146	13.35	9.24	15.82	45.67	-2.4	-3.46	9.4	129	1	2	3	0
Inosine	0.1% formic acid water	0.1% formic acid methanol	65% B isocratic elution	-1.27885	-1.38	-1.62	-1.34	-2.55	-2.19	-7.63	-1.55	0	-3.09	27.15	-1.3	4	7	2	19	405	1.11e+30	-617361	-37.38	1.8	261.27	285.84	2.46	0.01	9.42	243	21.5	459	3.18	11.36	10.23	10.31	29.87	-2.75	-2.08	9.18	129	2	3	4	0
Xanthosine	0.1% formic acid water	0.1% formic acid methanol	65% B isocratic elution	-1.15048	-1.28	-1.62	-1.92	-2.45	-2.14	-7.7	-1.55	0	-2.99	27.15	-2.4	5	7	2	20	434	1.11e+31	-664603	-37.75	1.91	265.99	291.82	2.47	0.01	15.45	240	28.5	439	14	11	9.33	12.24	32.43	-2.45	-3.34	12.18	146	2	3	4	0
Guanosine	0.1% formic acid water	0.1% formic acid methanol	65% B isocratic elution	-0.872431	-0.69	-1.84	-2.39	-2.88	-2.43	-8.07	-1.55	0	-3.19	27.15	-1.9	5	7	2	20	446	1.11e+32	-652123	-42.64	2.09	276.17	298.73	2.48	0.01	11.43	271	-5.63	543	-85.9	12.26	14.35	13.14	36.02	-2.86	-2.22	11.13	155	2	3	5	0
Uridine	0.1% formic acid water	0.1% formic acid methanol	65% B isocratic elution	-1.36541	-1.29	-1.3	-0.25	-1.69	-1.43	-6.9	-0.97	0	-2.71	27.15	-2	4	6	2	17	371	1.11e+28	-571934	-25.98	1.71	235.87	256.94	2.41	0.01	5.57	194	28.6	328	37.3	8.29	6.3	11.64	34.25	-0.98	-1.56	4.28	119	1	2	2	0
Adenosine	0.1% formic acid water	0.1% formic acid methanol	65% B isocratic elution	-0.196789	-0.25	-1.43	0.66	-2.56	-1.33	-7.59	-1.55	0	-2.07	27.15	-1.1	4	8	2	19	335	1.11e+31	-604889	-23.66	1.73	253.58	283.19	2.45	0.01	2.18	191	36.3	322	107	8.99	5.54	14.19	39.95	-0.74	-3.53	3.84	140	2	3	5	0
D-Pantothenic acid	0.1% formic acid water	0.1% formic acid methanol	80% B isocratic elution	-1.0176	-0.88	-1.4	1.6	-0.38	-1.75	-7.49	1.14	0	-3.39	29.26	-1.1	4	5	6	15	239	1.11e+31	-492236	-26.02	1.56	247.96	269.32	2.43	0	7.46	186	7.26	354	-39.4	8.13	8.95	6.22	23.15	-1.05	-7.18	4.69	107	0	0	1	0
niacinamide	0.1% formic acid water	0.1% formic acid methanol	80% B isocratic elution	0.738746	0.21	-0.39	3.02	-0.49	-0.79	-4.77	-0.01	0	-2.84	29.26	-0.4	1	2	1	9	114	111000000000000	-261773	-16.8	0.79	152.74	146.35	2.17	0	2.95	112	27.7	215	95.8	7.01	3.68	5.08	12.91	-3.24	-5.1	4.94	56	1	1	2	0
Pyridoxal	0.1% formic acid water	0.1% formic acid methanol	80% B isocratic elution	0.51684	0.1	-0.66	2.47	-1.09	-1.05	-5.77	-0.01	0	-2.49	29.26	0	2	4	2	12	162	1.11e+20	-370806	-16.87	1.08	190.02	193.09	2.29	0.01	3.53	121	8.31	226	-19.7	4.94	5.51	5.04	18.08	-1.4	-2.71	3.58	70.4	1	1	1	0
Pyridoxine	0.1% formic acid water	0.1% formic acid methanol	80% B isocratic elution	0.997258	0.71	-0.87	1.77	-1.2	-1.27	-5.93	-0.01	0	-2.74	29.26	-0.8	3	4	2	12	142	1.11e+22	-371565	-22.39	1.06	195.11	198.18	2.3	0	9.44	137	11.5	264	32	6.46	6.06	11.25	32	0.01	-3.22	2.9	73.6	1	1	1	0
Pyridoxamine	0.1% formic acid water	0.1% formic acid methanol	80% B isocratic elution	1.00886	0.63	-0.8	2.14	-1.14	-1.31	-6.09	-0.01	0	-2.69	29.26	-1	3	4	2	12	143	1.11e+23	-359090	-19.85	1.23	199.15	205.79	2.31	0.01	2.37	144	49.5	321	233	9.73	4.96	8.51	18.04	-0.23	-3.37	4.35	79.4	1	1	2	0
Thiamine	0.1% formic acid water	0.1% formic acid methanol	80% B isocratic elution	0.789722	0.46	0	0	-1.26	-1.26	-9.42	-0.97	0	-3.28	29.26	0	2	6	4	19	269	1.11e+34	-727954	-65.42	1.49	291.55	320.17	2.51	-0.99	0	200	-71.2	335	-70.9	6.56	7.95	14.5	36.27	1.75	-2.99	10.15	104	2	2	4	1
Nicotinicacid	0.1% formic acid water	0.1% formic acid methanol	80% B isocratic elution	0.161832	0.26	-0.26	3.56	-0.78	-0.81	-4.52	-0.01	0	-2.42	29.26	0.4	1	3	1	9	114	11100000000000	-274248	-12.08	0.77	149.15	142	2.15	0	0.88	92.9	1.16	177	-39.1	3.37	4.37	3.73	20.67	-2.73	-2.8	3.67	50.2	1	1	1	0
Alanine	0.1% formic acid water	0.1% formic acid methanol	80% B isocratic elution	-0.295542	-0.15	-0.24	3.79	0.61	-0.94	-3.65	1.14	0	-3.09	29.26	-3	2	3	1	6	61.8	1110000000000	-203245	-12.07	0.88	123.86	112.49	2.05	0	1.93	103	20.6	223	81.1	5.25	4.15	6.92	15.51	-0.69	-4.07	2.88	63.3	0	0	1	0
Leucine	0.1% formic acid water	0.1% formic acid methanol	80% B isocratic elution	0.243807	0.26	-0.36	3.98	0.13	-0.82	-5.44	1.14	0	-2.69	29.26	-1.5	2	3	3	9	101	1.11e+21	-277279	-11.49	0.91	176.64	178.51	2.25	0	1.75	97.3	10	188	15.9	4.1	4.03	4.32	23.12	-1.46	-4.42	4.6	63.3	0	0	1	0
Isoleucine	0.1% formic acid water	0.1% formic acid methanol	80% B isocratic elution	0.352846	0.28	-0.37	3.99	0.1	-0.8	-5.39	1.14	0	-2.65	29.26	-1.7	2	3	3	9	103	1.11e+21	-277278	-11.39	0.9	174.76	177.8	2.25	0	1.86	95.2	4.07	178	-13.2	3.66	4.06	5.29	24.73	-0.48	-4.81	8.21	63.3	0	0	1	0
Valine	0.1% formic acid water	0.1% formic acid methanol	80% B isocratic elution	0.415912	0.16	-0.36	3.48	0.9	-0.51	-4.77	1.14	0	-3.11	29.26	-2.3	2	3	2	8	90.4	1.11e+18	-252603	-16.64	0.58	154.87	154.22	2.19	0	7.95	86.9	30.2	126	74.6	3.87	1.16	5.48	13.49	-1.89	-5.23	8.12	63.3	0	0	1	0
Proline	0.1% formic acid water	0.1% formic acid methanol	80% B isocratic elution	0.108093	0.33	-0.33	3.62	-0.5	-0.86	-4.48	0.18	0	-2.62	29.26	-2.5	2	3	1	8	103	1.11e+16	-251835	-13.13	0.77	147.6	142.26	2.15	0	3.61	94.9	18	192	36.7	4.47	4	3.51	21.36	-3.35	-4.13	3.48	49.3	1	1	1	0
Phenylalanine	0.1% formic acid water	0.1% formic acid methanol	80% B isocratic elution	0.359627	0.17	-0.68	2.97	-0.87	-0.89	-6.22	-0.01	0	-2.57	29.26	-1.5	2	3	3	12	153	1.11e+22	-348280	-15.74	1.01	200.74	208.03	2.32	0	2.66	122	9.49	216	30.8	4.48	4.38	4.16	22.91	-1.94	-2.63	7.78	63.3	0	1	1	0
Methionine	0.1% formic acid water	0.1% formic acid methanol	80% B isocratic elution	-0.244775	-0.09	-0.62	3.26	0.13	-0.94	-5.95	1.14	0	-2.98	29.26	-1.9	2	4	4	9	97	1.11e+19	-502501	-15.83	1.08	186.45	185.96	2.27	0.01	4.25	126	19.1	229	42.1	4.86	4.41	4.94	22.93	-1.51	-3.09	4.05	88.6	0	0	1	1
Tryptophan	0.1% formic acid water	0.1% formic acid methanol	80% B isocratic elution	-0.0665496	-0.27	-1.12	1.74	-1.63	-1.06	-7.25	-0.59	0	-2.54	29.26	-1.1	3	3	3	15	245	1.11e+26	-430876	-21.02	1.24	233.33	250.05	2.4	0	5.34	153	-10.6	271	-20.2	4.73	6.7	4.11	22.25	-1.98	-4.08	5.74	79.1	1	2	2	0
Serine	0.1% formic acid water	0.1% formic acid methanol	80% B isocratic elution	-0.328109	-0.24	-0.36	2.82	0.6	-0.97	-3.82	1.14	0	-3.2	29.26	-3.1	3	4	2	7	72.6	11100000000000	-250467	-14.94	1.06	132.32	122.02	2.09	0	3.06	118	4.07	216	-33.2	4.49	4.85	3.58	19.55	-4.08	-3.26	0.99	83.6	0	0	1	0
Glutamine	0.1% formic acid water	0.1% formic acid methanol	80% B isocratic elution	-0.632154	-0.32	-0.65	1.53	0.53	-1.48	-5.33	1.14	0	-3.85	29.26	-3.1	3	4	4	10	146	1.11e+19	-333835	-24.89	1.35	180.5	176.05	2.25	0	6.95	174	25	351	64	9.61	7.18	5.6	22.19	-3.61	-5.52	7.53	106	0	0	2	0
Threonine	0.1% formic acid water	0.1% formic acid methanol	80% B isocratic elution	-0.22278	-0.15	-0.46	3.49	0.32	-1	-4.39	1.14	0	-2.98	29.26	-2.9	3	4	2	8	93.3	1.11e+16	-275147	-14.56	1.14	149.43	144.38	2.16	0.01	4	119	6.4	228	-10.9	5.24	4.98	2.45	17.53	-4.59	-5.42	3.68	83.6	0	0	1	0
Cysteine	0.1% formic acid water	0.1% formic acid methanol	80% B isocratic elution	-0.620511	-0.47	-0.48	3.62	0.11	-0.76	-4.75	1.14	0	-2.8	29.26	-2.5	3	4	2	7	75.3	11100000000000	-453148	-13.45	1	147.18	141.36	2.15	0.01	3.06	108	-15.6	173	-97.6	1.79	4.69	5.27	20.11	-1.25	-3.34	5	64.3	0	0	1	1
Asparagine	0.1% formic acid water	0.1% formic acid methanol	80% B isocratic elution	-0.785646	-0.34	-0.37	2.07	0.8	-1.5	-4.65	1.14	0	-4.08	29.26	-3.4	3	4	3	9	134	1.11e+16	-309157	-24.85	1.33	160.84	155.26	2.19	0	3.88	177	14.7	352	34.5	9.05	7.57	3.77	19.29	-6.05	-4.96	6.4	106	0	0	2	0
Glutamicacid	0.1% formic acid water	0.1% formic acid methanol	80% B isocratic elution	-0.718828	-0.26	-0.56	2.12	0.93	-1.13	-5.01	1.14	0	-3.86	29.26	-3.7	3	5	4	10	145	1.11e+18	-346311	-25.1	1.06	172.73	167.41	2.22	0	8.05	150	9.3	247	-26.7	4.8	5.32	4.16	20.54	-4.48	-4.16	4.84	101	0	0	1	1
Lysine	0.1% formic acid water	0.1% formic acid methanol	80% B isocratic elution	0.0124943	-0.23	-0.75	2.83	0.84	-0.9	-5.87	1.14	0	-3.5	29.26	-3	3	4	5	10	106	1.11e+23	-312026	-21.17	0.86	191.1	191.01	2.28	0	5.99	127	75.3	255	325	8.64	1.15	8.95	18.74	-1	-1.73	0.96	89.3	0	0	2	0
Arginine	0.1% formic acid water	0.1% formic acid methanol	80% B isocratic elution	0.0290513	0.07	-1	1.47	0.68	-1.23	-6.53	1.14	0	-3.88	29.26	-4.2	4	4	5	12	176	1.11e+25	-380778	-28.48	1.38	214.93	214.24	2.33	0	9.11	182	56.4	339	241	10.62	3.9	10.66	22.26	-2.7	-2.93	1.97	128	0	0	4	0
Histidine	0.1% formic acid water	0.1% formic acid methanol	80% B isocratic elution	0.234396	-0.03	-0.58	1.3	0.16	-1.11	-5.44	0.18	0	-3.76	29.26	-3.2	3	4	3	11	151	1.11e+19	-344509	-27.47	0.98	180.91	181.77	2.26	0	5.04	160	36.7	296	139	8.38	4.38	5.7	14.6	-3.9	-4.52	8.26	92	1	1	3	0
Citrulline	0.1% formic acid water	0.1% formic acid methanol	80% B isocratic elution	-0.0756778	-0.44	-0.95	1.3	0.42	-1.78	-6.4	1.14	0	-4.13	29.26	-4.3	4	4	5	12	171	1.11e+24	-393268	-29.64	1.53	214.73	215.15	2.33	0	7.6	204	40.5	433	151	12.42	8.36	5.05	24.14	-4.38	-3.03	2.31	118	0	0	3	0
Taurine	0.1% formic acid water	0.1% formic acid methanol	80% B isocratic elution	-1.17374	-0.82	-0.46	3.08	0.73	-1.17	-4.11	1.14	0	-3.58	29.26	-4.1	2	4	2	7	120	11100000000000	-476406	-18.56	1.09	143.51	133.49	2.13	0.01	3.57	138	-7.89	285	-71.8	4.16	6.16	-2.47	10.55	-10.36	-3.86	3.47	88.8	0	0	1	1
Tyrosine	0.1% formic acid water	0.1% formic acid methanol	80% B isocratic elution	0.00274662	0.05	-1.01	2.22	-1.06	-1.39	-6.35	-0.01	0	-2.93	29.26	-2.3	3	4	3	13	176	1.11e+23	-395507	-20.45	1.27	210.41	219.03	2.34	0	4.34	158	-11.2	301	-58.2	5.35	7.81	4.18	23.28	-2.58	-2.6	8.84	83.6	0	1	1	0
Hypotaurine	0.1% formic acid water	0.1% formic acid methanol	80% B isocratic elution	-0.654427	-0.41	-0.31	3.16	0.67	-1.14	-4.2	1.14	0	-3.55	29.26	-1.5	2	4	2	6	55.5	1110000000000	-429187	-19.14	0.95	136.46	125.99	2.1	0	5.56	129	43.8	272	164	8.05	3.84	8.34	19	-1.9	-2.55	5.19	82.5	0	0	1	1
L-Hydroxyproline	0.1% formic acid water	0.1% formic acid methanol	80% B isocratic elution	-0.23605	-0.04	-0.51	2.82	-0.44	-1.36	-4.59	0.18	0	-3.16	29.26	-3.3	3	4	1	9	125	1.11e+17	-299059	-18.75	1.12	155.95	154.27	2.19	0	3.05	140	34.4	301	118	8.1	5.75	7.9	18.5	-1.19	-2.19	3.72	69.6	1	1	1	0
N-omiga-acetylhistamine	0.1% formic acid water	0.1% formic acid methanol	80% B isocratic elution	0.857051	0.91	-0.81	2.28	-0.23	-1.21	-6.13	0.18	0	-3.5	29.26	-0.4	2	2	3	11	138	1.11e+21	-321960	-23.57	0.83	195.51	194.44	2.29	0	4.66	148	58.4	320	214	11.2	4.88	6.06	14.64	-2.8	-2.61	4.77	57.8	1	1	3	0
L-pyroglutamicacid	0.1% formic acid water	0.1% formic acid methanol	80% B isocratic elution	-0.676026	-0.6	-0.42	2.43	-0.16	-1.19	-4.44	0.18	0	-3.35	29.26	-0.8	2	3	1	9	154	1110000000000000	-298326	-20.95	0.96	151.34	146.44	2.17	0	7.17	137	11.3	267	-26.3	6.36	6.48	3.66	21.17	-4.87	-2.3	6.22	66.4	1	1	1	0
Tyramine	0.1% formic acid water	0.1% formic acid methanol	80% B isocratic elution	0.385878	-0.21	-0.52	3.22	-0.94	-0.9	-5.8	-0.01	0	-2.52	29.26	1.1	2	2	2	10	87.3	1.11e+20	-277120	-13.98	0.82	183.62	181.83	2.26	0	2.6	106	27.2	227	168	5.88	3.52	8.82	18.57	0.95	-2.63	3.17	46.2	0	1	1	0
Histamine	0.1% formic acid water	0.1% formic acid methanol	80% B isocratic elution	0.391306	0.82	-0.57	2.94	-0.2	-1.03	-4.86	0.18	0	-3.16	29.26	-0.7	2	2	2	8	64.7	1.11e+16	-226118	-18.32	0.8	155.19	146.49	2.17	0	4.89	122	68.6	307	360	10.5	2.98	8.7	18.47	-1.26	-2.85	4.92	54.7	1	1	3	0
AaC	0.1% formic acid water	0.1% formic acid methanol	80% B isocratic elution	0.943052	0.61	-0.74	2.2	-2.42	-0.49	-6.79	-1.36	0.01	-1.73	29.26	2.6	2	2	0	14	219	1.11e+22	-369670	-14.85	0.86	210.7	216.51	2.34	0	2.51	108	-19	154	-31.5	2.67	3.95	5.78	12.59	0.02	-2.83	2.59	54.7	2	3	3	0
IQx	0.1% formic acid water	0.1% formic acid methanol	80% B isocratic elution	1.00281	0.66	-0.92	0.96	-2.02	-0.98	-6.86	-1.36	0	-2.4	29.26	0.6	1	4	0	15	246	1.11e+23	-414479	-25.04	0.93	218.25	227.81	2.36	0.01	8.8	141	56.1	274	235	9.64	3.08	5.71	14.84	-2.23	-2.75	8.88	69.6	2	3	5	0
8-MeIQx	0.1% formic acid water	0.1% formic acid methanol	80% B isocratic elution	1.15935	0.69	-1.06	0.92	-2.19	-1	-7.51	-1.36	0	-2.3	29.26	1	1	4	0	16	271	1.11e+26	-439162	-25.13	0.98	237.6	249.06	2.4	0.01	7.72	142	63.8	281	265	10.06	2.97	5.88	15.22	-1.59	-1.95	7.78	69.6	2	3	5	0
MeIQ	0.1% formic acid water	0.1% formic acid methanol	80% B isocratic elution	1.26085	0.75	-0.94	1.35	-2.44	-0.72	-7.59	-1.36	0.01	-1.87	29.26	2	1	3	0	16	270	1.11e+27	-429091	-21.18	0.93	236.91	253.92	2.4	0	9.17	124	38.5	216	166	7.22	2.74	7.22	16.13	0.27	-4.33	9.28	56.7	2	3	4	0
IQ[4,5-b]	0.1% formic acid water	0.1% formic acid methanol	80% B isocratic elution	0.972656	0.66	-0.99	0.7	-2.13	-0.97	-7.11	-1.36	0	-2.43	29.26	1.7	1	3	0	15	245	1.11e+24	-404413	-27.45	0.9	223.43	232.81	2.37	0	10.84	139	39.2	269	182	8.87	4.02	6.83	16.69	-0.82	-4.58	11	56.7	2	3	4	0
Harman	0.1% formic acid water	0.1% formic acid methanol	80% B isocratic elution	1.39619	0.91	-0.43	2.69	-2.49	-0.42	-7	-1.36	0.01	-1.52	29.26	3.6	1	1	0	14	216	1.11e+23	-359587	-12.73	0.59	214.44	223.28	2.35	0	4.55	81.6	10	132	63.3	3.7	2.33	7.72	16.34	1.94	-4.95	4.58	28.7	2	3	2	0
IQ	0.1% formic acid water	0.1% formic acid methanol	80% B isocratic elution	1.14505	0.98	-0.85	1.43	-2.34	-0.71	-7.1	-1.36	0	-1.95	29.26	1.5	1	3	0	15	245	1.11e+24	-404413	-20.86	0.92	222.22	233.02	2.37	0	8.83	123	32.7	213	148	6.9	2.78	7	15.75	-0.15	-2.69	8.95	56.7	2	3	4	0
Norharman	0.1% formic acid water	0.1% formic acid methanol	80% B isocratic elution	1.19582	0.88	-0.47	2.73	-2.32	-0.47	-6.39	-1.36	0.01	-1.72	29.26	3.2	1	1	0	13	193	1.11e+20	-334905	-13.23	0.56	196.55	201.82	2.3	0	4.61	85.1	3.38	142	46.2	3.74	2.88	7.61	16.32	1.37	-4.84	4.64	28.7	2	3	2	0
DMIP	0.1% formic acid water	0.1% formic acid methanol	80% B isocratic elution	1.22241	0.94	-0.83	1.51	-1.12	-1.01	-6.16	-0.59	0	-2.82	29.26	1	1	3	0	12	172	1.11e+21	-332645	-25.27	0.81	195.56	198.01	2.3	0.01	9.99	128	57.4	269	243	9.75	3.19	7.16	17.5	-1.15	-4.24	10.15	56.7	2	2	4	0
Phe-p-1	0.1% formic acid water	0.1% formic acid methanol	80% B isocratic elution	1.41766	0.94	-0.46	2.74	-2.2	-0.4	-6.79	-1.16	0.01	-1.66	29.26	2.3	1	2	1	13	152	1.11e+22	-335660	-12.87	0.73	209.56	213.73	2.33	0	3.22	91.3	4.88	123	51	3.16	1.78	7	14.9	1.32	-6	3.7	38.9	1	2	2	0
7,8-DiMeIQx	0.1% formic acid water	0.1% formic acid methanol	80% B isocratic elution	1.11487	0.77	-1.17	0.84	-2.35	-1	-8.08	-1.36	0	-2.19	29.26	1.4	1	4	0	17	297	1.11e+29	-463843	-25.35	1.03	254.55	269.67	2.43	0.01	6.62	143	68.9	284	281	10.44	2.87	6.01	15.48	-1.09	-4.51	6.74	69.6	2	3	5	0
Sarcosine	0.1% formic acid water	0.1% formic acid methanol	80% B isocratic elution	-0.38768	-0.14	-0.21	4.28	0.6	-0.89	-3.82	1.14	0	-3.06	29.26	-2.8	2	3	2	6	52.8	1110000000000	-203238	-12.38	0.78	127.98	113.01	2.05	0	2.92	94.2	17.5	201	42.4	4.57	4.19	4.37	24.65	-2.74	-4.93	8.22	49.3	0	0	1	0
Creatinine	0.1% formic acid water	0.1% formic acid methanol	80% B isocratic elution	0.539043	0.51	-0.34	1.29	0.22	-1.29	-4.4	0.18	0	-3.86	29.26	-1.8	1	1	0	8	151	111000000000000	-248681	-30.05	0.8	143.83	134.46	2.13	0	11.98	146	74.4	333	274	12.86	4.35	5.11	15.98	-5.3	-5.49	12.08	58.7	1	1	3	0
L-dihydrooroticacid	0.1% formic acid water	0.1% formic acid methanol	80% B isocratic elution	-1.80188	-2.44	-0.5	1.72	-0.4	-1.39	-4.77	-0.01	0	-3.46	29.26	-1.5	3	4	1	11	225	1.11e+16	-379565	-23.86	1.38	167.39	163.4	2.21	0.01	5.18	172	-17.2	327	-144	5.51	8.7	2.35	17.25	-6.68	-4.92	4.87	95.5	1	1	2	0
L-Carnosine	0.1% formic acid water	0.1% formic acid methanol	80% B isocratic elution	0.138217	-0.14	-1.29	-0.26	-0.56	-2.03	-7.68	0.18	0	-4.07	29.26	-4	4	5	6	16	259	1.11e+29	-499765	-38.44	1.62	256.29	270.05	2.43	0	12.99	233	51	527	223	14.27	9.82	9.18	20.43	-2.61	-2.2	9.07	121	1	1	4	0
Betaine	0.1% formic acid water	0.1% formic acid methanol	80% B isocratic elution	0.6099	0.52	-0.94	-0.47	1.6	-1.81	-4.74	1.14	0	-5.11	29.26	0.5	0	2	1	8	87.6	1.11e+18	-252565	-41.59	0.81	153.39	154.86	2.19	0	15.35	178	181	468	789	21.46	0.08	1.63	14.25	-9.97	-2.66	15.47	40.1	0	0	1	0
Cytosine	0.1% formic acid water	0.1% formic acid methanol	80% B isocratic elution	0.471175	0.32	0.16	0.33	-0.33	-1.61	-4.17	-0.01	0	-3.99	29.26	-1.7	2	2	0	8	170	1110000000000	-247927	-34.38	0.87	136.73	126.12	2.1	0	12.89	167	25.9	432	122	12.95	9.67	6.77	18.33	-4	-2.61	13.02	67.5	1	1	3	0
Hypoxanthine	0.1% formic acid water	0.1% formic acid methanol	80% B isocratic elution	-0.122563	0.08	-0.11	1.31	-0.8	-1.27	-4.52	-0.59	0	-3.44	29.26	-0.5	2	3	0	10	190	11100000000000	-305849	-25.27	0.97	150.2	143.93	2.16	0.01	2.51	159	5.76	351	-26.8	8.83	8.14	3.33	11.33	-6.92	-2.86	2.6	70.1	2	2	4	0
Xanthine	0.1% formic acid water	0.1% formic acid methanol	80% B isocratic elution	-0.588349	-0.29	-0.29	1.37	-1	-1.25	-4.77	-0.59	0	-3.24	29.26	-0.7	3	3	0	11	217	111000000000000	-353097	-23.72	1.25	159.89	153.96	2.19	0.01	6.06	170	-15.1	367	-128	7.64	10.2	7.74	22.93	-2.99	-2.73	6.1	86.9	2	2	4	0
Guanine	0.1% formic acid water	0.1% formic acid methanol	80% B isocratic elution	0.01503	0.12	-0.19	0.35	-1.01	-1.59	-4.93	-0.59	0	-3.68	29.26	-1.1	3	3	0	11	225	1110000000000000	-340610	-30.43	1.22	164.42	158.81	2.2	0.01	3.28	191	-7.34	441	-50.1	10.78	11.63	4.81	13.86	-5.99	-2.81	3.34	96.2	2	2	5	0
Adenine	0.1% formic acid water	0.1% formic acid methanol	80% B isocratic elution	0.930201	0.34	-0.36	0.65	-1.04	-1.37	-4.68	-0.59	0	-3.36	29.26	-0.1	2	4	0	10	127	111000000000000	-293365	-30.51	0.99	153.88	148.09	2.17	0	11.17	161	9.31	380	47.5	10.2	8.73	5.5	15	-4.52	-2.45	11.33	80.5	2	2	5	0
Beta-Thymidine	0.1% formic acid water	0.1% formic acid methanol	80% B isocratic elution	-1.15797	-1.83	-1.22	1.16	-1.86	-1.29	-7.48	-0.97	0	-2.68	29.26	-1.2	3	5	2	17	381	1.11e+30	-549390	-24.52	1.42	246.36	266.66	2.43	0.01	4.01	176	50.1	310	96.6	9.28	5.39	15.53	45.1	-0.93	-3.96	6.43	99.1	1	2	2	0
Cytidine	0.1% formic acid water	0.1% formic acid methanol	80% B isocratic elution	-0.468069	-0.96	-1.27	-2.05	-2.05	-1.99	-7.18	-0.97	0	-3.3	29.26	-2.1	4	5	2	17	383	1.11e+29	-559442	-33.42	1.74	241.37	261.47	2.42	0.01	6.86	228	40.6	467	146	13.35	9.24	15.82	45.67	-2.4	-3.46	9.4	129	1	2	3	0
Inosine	0.1% formic acid water	0.1% formic acid methanol	80% B isocratic elution	-1.27779	-1.36	-1.42	-1.34	-2.54	-2.03	-7.7	-1.55	0	-3.2	29.26	-1.3	4	7	2	19	405	1.11e+30	-617361	-37.38	1.8	261.27	285.84	2.46	0.01	9.42	243	21.5	459	3.18	11.36	10.23	10.31	29.87	-2.75	-2.08	9.18	129	2	3	4	0
Xanthosine	0.1% formic acid water	0.1% formic acid methanol	80% B isocratic elution	-1.15596	-1.28	-1.44	-1.92	-2.45	-1.98	-7.78	-1.55	0	-3.09	29.26	-2.4	5	7	2	20	434	1.11e+31	-664603	-37.75	1.91	265.99	291.82	2.47	0.01	15.45	240	28.5	439	14	11	9.33	12.24	32.43	-2.45	-3.34	12.18	146	2	3	4	0
Guanosine	0.1% formic acid water	0.1% formic acid methanol	80% B isocratic elution	-0.870402	-0.7	-1.61	-2.39	-2.86	-2.27	-8.14	-1.55	0	-3.31	29.26	-1.9	5	7	2	20	446	1.11e+32	-652123	-42.64	2.09	276.17	298.73	2.48	0.01	11.43	271	-5.63	543	-85.9	12.26	14.35	13.14	36.02	-2.86	-2.22	11.13	155	2	3	5	0
Adenosine	0.1% formic acid water	0.1% formic acid methanol	80% B isocratic elution	-0.172254	-0.27	-1.38	0.66	-2.7	-1.22	-7.65	-1.55	0	-2.11	29.26	-1.1	4	8	2	19	335	1.11e+31	-604889	-23.66	1.73	253.58	283.19	2.45	0.01	2.18	191	36.3	322	107	8.99	5.54	14.19	39.95	-0.74	-3.53	3.84	140	2	3	5	0
D-Pantothenic acid	0.1% formic acid water	0.1% formic acid methanol	95% B isocratic elution	-1.00681	-1.02	-1.32	1.6	-0.46	-1.64	-7.54	1.14	0	-3.45	31.36	-1.1	4	5	6	15	239	1.11e+31	-492236	-26.02	1.56	247.96	269.32	2.43	0	7.46	186	7.26	354	-39.4	8.13	8.95	6.22	23.15	-1.05	-7.18	4.69	107	0	0	1	0
niacinamide	0.1% formic acid water	0.1% formic acid methanol	95% B isocratic elution	0.712003	0.19	-0.34	3.02	-0.51	-0.73	-4.8	-0.01	0	-2.89	31.36	-0.4	1	2	1	9	114	111000000000000	-261773	-16.8	0.79	152.74	146.35	2.17	0	2.95	112	27.7	215	95.8	7.01	3.68	5.08	12.91	-3.24	-5.1	4.94	56	1	1	2	0
Pyridoxal	0.1% formic acid water	0.1% formic acid methanol	95% B isocratic elution	0.522438	0.12	-0.65	2.47	-1.2	-0.98	-5.81	-0.01	0	-2.51	31.36	0	2	4	2	12	162	1.11e+20	-370806	-16.87	1.08	190.02	193.09	2.29	0.01	3.53	121	8.31	226	-19.7	4.94	5.51	5.04	18.08	-1.4	-2.71	3.58	70.4	1	1	1	0
Pyridoxine	0.1% formic acid water	0.1% formic acid methanol	95% B isocratic elution	0.993884	0.7	-0.84	1.77	-1.28	-1.19	-5.97	-0.01	0	-2.78	31.36	-0.8	3	4	2	12	142	1.11e+22	-371565	-22.39	1.06	195.11	198.18	2.3	0	9.44	137	11.5	264	32	6.46	6.06	11.25	32	0.01	-3.22	2.9	73.6	1	1	1	0
Pyridoxamine	0.1% formic acid water	0.1% formic acid methanol	95% B isocratic elution	1.01041	0.63	-0.76	2.14	-1.21	-1.22	-6.13	-0.01	0	-2.73	31.36	-1	3	4	2	12	143	1.11e+23	-359090	-19.85	1.23	199.15	205.79	2.31	0.01	2.37	144	49.5	321	233	9.73	4.96	8.51	18.04	-0.23	-3.37	4.35	79.4	1	1	2	0
Thiamine	0.1% formic acid water	0.1% formic acid methanol	95% B isocratic elution	0.78319	0.56	0	0	-1.38	-1.18	-9.47	-0.97	0	-3.32	31.36	0	2	6	4	19	269	1.11e+34	-727954	-65.42	1.49	291.55	320.17	2.51	-0.99	0	200	-71.2	335	-70.9	6.56	7.95	14.5	36.27	1.75	-2.99	10.15	104	2	2	4	1
Nicotinicacid	0.1% formic acid water	0.1% formic acid methanol	95% B isocratic elution	0.151235	0.23	-0.27	3.56	-0.87	-0.76	-4.55	-0.01	0	-2.44	31.36	0.4	1	3	1	9	114	11100000000000	-274248	-12.08	0.77	149.15	142	2.15	0	0.88	92.9	1.16	177	-39.1	3.37	4.37	3.73	20.67	-2.73	-2.8	3.67	50.2	1	1	1	0
Alanine	0.1% formic acid water	0.1% formic acid methanol	95% B isocratic elution	-0.321663	-0.13	-0.23	3.79	0.58	-0.88	-3.68	1.14	0	-3.12	31.36	-3	2	3	1	6	61.8	1110000000000	-203245	-12.07	0.88	123.86	112.49	2.05	0	1.93	103	20.6	223	81.1	5.25	4.15	6.92	15.51	-0.69	-4.07	2.88	63.3	0	0	1	0
Leucine	0.1% formic acid water	0.1% formic acid methanol	95% B isocratic elution	0.252085	0.27	-0.4	3.98	-0.01	-0.77	-5.47	1.14	0	-2.69	31.36	-1.5	2	3	3	9	101	1.11e+21	-277279	-11.49	0.91	176.64	178.51	2.25	0	1.75	97.3	10	188	15.9	4.1	4.03	4.32	23.12	-1.46	-4.42	4.6	63.3	0	0	1	0
Isoleucine	0.1% formic acid water	0.1% formic acid methanol	95% B isocratic elution	0.352592	0.28	-0.41	3.99	-0.03	-0.75	-5.42	1.14	0	-2.66	31.36	-1.7	2	3	3	9	103	1.11e+21	-277278	-11.39	0.9	174.76	177.8	2.25	0	1.86	95.2	4.07	178	-13.2	3.66	4.06	5.29	24.73	-0.48	-4.81	8.21	63.3	0	0	1	0
Valine	0.1% formic acid water	0.1% formic acid methanol	95% B isocratic elution	0.393821	0.2	-0.35	3.48	0.83	-0.47	-4.8	1.14	0	-3.14	31.36	-2.3	2	3	2	8	90.4	1.11e+18	-252603	-16.64	0.58	154.87	154.22	2.19	0	7.95	86.9	30.2	126	74.6	3.87	1.16	5.48	13.49	-1.89	-5.23	8.12	63.3	0	0	1	0
Proline	0.1% formic acid water	0.1% formic acid methanol	95% B isocratic elution	0.0938883	0.36	-0.33	3.62	-0.57	-0.8	-4.51	0.18	0	-2.65	31.36	-2.5	2	3	1	8	103	1.11e+16	-251835	-13.13	0.77	147.6	142.26	2.15	0	3.61	94.9	18	192	36.7	4.47	4	3.51	21.36	-3.35	-4.13	3.48	49.3	1	1	1	0
Phenylalanine	0.1% formic acid water	0.1% formic acid methanol	95% B isocratic elution	0.361712	0.14	-0.67	2.97	-1	-0.84	-6.26	-0.01	0	-2.59	31.36	-1.5	2	3	3	12	153	1.11e+22	-348280	-15.74	1.01	200.74	208.03	2.32	0	2.66	122	9.49	216	30.8	4.48	4.38	4.16	22.91	-1.94	-2.63	7.78	63.3	0	1	1	0
Methionine	0.1% formic acid water	0.1% formic acid methanol	95% B isocratic elution	-0.248476	-0.12	-0.61	3.26	0.03	-0.88	-5.99	1.14	0	-3	31.36	-1.9	2	4	4	9	97	1.11e+19	-502501	-15.83	1.08	186.45	185.96	2.27	0.01	4.25	126	19.1	229	42.1	4.86	4.41	4.94	22.93	-1.51	-3.09	4.05	88.6	0	0	1	1
Tryptophan	0.1% formic acid water	0.1% formic acid methanol	95% B isocratic elution	-0.0591627	-0.31	-1.08	1.74	-1.77	-1	-7.3	-0.59	0	-2.57	31.36	-1.1	3	3	3	15	245	1.11e+26	-430876	-21.02	1.24	233.33	250.05	2.4	0	5.34	153	-10.6	271	-20.2	4.73	6.7	4.11	22.25	-1.98	-4.08	5.74	79.1	1	2	2	0
Serine	0.1% formic acid water	0.1% formic acid methanol	95% B isocratic elution	-0.361954	-0.21	-0.33	2.82	0.58	-0.92	-3.85	1.14	0	-3.24	31.36	-3.1	3	4	2	7	72.6	11100000000000	-250467	-14.94	1.06	132.32	122.02	2.09	0	3.06	118	4.07	216	-33.2	4.49	4.85	3.58	19.55	-4.08	-3.26	0.99	83.6	0	0	1	0
Glutamine	0.1% formic acid water	0.1% formic acid methanol	95% B isocratic elution	-0.64676	-0.3	-0.53	1.53	0.57	-1.38	-5.36	1.14	0	-3.92	31.36	-3.1	3	4	4	10	146	1.11e+19	-333835	-24.89	1.35	180.5	176.05	2.25	0	6.95	174	25	351	64	9.61	7.18	5.6	22.19	-3.61	-5.52	7.53	106	0	0	2	0
Threonine	0.1% formic acid water	0.1% formic acid methanol	95% B isocratic elution	-0.241566	-0.13	-0.45	3.49	0.26	-0.94	-4.43	1.14	0	-3	31.36	-2.9	3	4	2	8	93.3	1.11e+16	-275147	-14.56	1.14	149.43	144.38	2.16	0.01	4	119	6.4	228	-10.9	5.24	4.98	2.45	17.53	-4.59	-5.42	3.68	83.6	0	0	1	0
Cysteine	0.1% formic acid water	0.1% formic acid methanol	95% B isocratic elution	-0.650136	-0.47	-0.49	3.62	0.02	-0.72	-4.79	1.14	0	-2.83	31.36	-2.5	3	4	2	7	75.3	11100000000000	-453148	-13.45	1	147.18	141.36	2.15	0.01	3.06	108	-15.6	173	-97.6	1.79	4.69	5.27	20.11	-1.25	-3.34	5	64.3	0	0	1	1
Asparagine	0.1% formic acid water	0.1% formic acid methanol	95% B isocratic elution	-0.824094	-0.32	-0.22	2.07	0.88	-1.4	-4.69	1.14	0	-4.17	31.36	-3.4	3	4	3	9	134	1.11e+16	-309157	-24.85	1.33	160.84	155.26	2.19	0	3.88	177	14.7	352	34.5	9.05	7.57	3.77	19.29	-6.05	-4.96	6.4	106	0	0	2	0
Glutamicacid	0.1% formic acid water	0.1% formic acid methanol	95% B isocratic elution	-0.753779	-0.23	-0.46	2.12	0.94	-1.06	-5.05	1.14	0	-3.93	31.36	-3.7	3	5	4	10	145	1.11e+18	-346311	-25.1	1.06	172.73	167.41	2.22	0	8.05	150	9.3	247	-26.7	4.8	5.32	4.16	20.54	-4.48	-4.16	4.84	101	0	0	1	1
Lysine	0.1% formic acid water	0.1% formic acid methanol	95% B isocratic elution	-0.00178156	-0.24	-0.69	2.83	0.81	-0.83	-5.9	1.14	0	-3.55	31.36	-3	3	4	5	10	106	1.11e+23	-312026	-21.17	0.86	191.1	191.01	2.28	0	5.99	127	75.3	255	325	8.64	1.15	8.95	18.74	-1	-1.73	0.96	89.3	0	0	2	0
Arginine	0.1% formic acid water	0.1% formic acid methanol	95% B isocratic elution	0.0116558	0.04	-0.87	1.47	0.7	-1.13	-6.57	1.14	0	-3.96	31.36	-4.2	4	4	5	12	176	1.11e+25	-380778	-28.48	1.38	214.93	214.24	2.33	0	9.11	182	56.4	339	241	10.62	3.9	10.66	22.26	-2.7	-2.93	1.97	128	0	0	4	0
Histidine	0.1% formic acid water	0.1% formic acid methanol	95% B isocratic elution	0.198566	-0.02	-0.44	1.3	0.21	-1.02	-5.48	0.18	0	-3.85	31.36	-3.2	3	4	3	11	151	1.11e+19	-344509	-27.47	0.98	180.91	181.77	2.26	0	5.04	160	36.7	296	139	8.38	4.38	5.7	14.6	-3.9	-4.52	8.26	92	1	1	3	0
Citrulline	0.1% formic acid water	0.1% formic acid methanol	95% B isocratic elution	-0.0933495	-0.45	-0.79	1.3	0.47	-1.66	-6.44	1.14	0	-4.23	31.36	-4.3	4	4	5	12	171	1.11e+24	-393268	-29.64	1.53	214.73	215.15	2.33	0	7.6	204	40.5	433	151	12.42	8.36	5.05	24.14	-4.38	-3.03	2.31	118	0	0	3	0
Taurine	0.1% formic acid water	0.1% formic acid methanol	95% B isocratic elution	-1.21043	-0.86	-0.39	3.08	0.73	-1.11	-4.15	1.14	0	-3.63	31.36	-4.1	2	4	2	7	120	11100000000000	-476406	-18.56	1.09	143.51	133.49	2.13	0.01	3.57	138	-7.89	285	-71.8	4.16	6.16	-2.47	10.55	-10.36	-3.86	3.47	88.8	0	0	1	1
Tyrosine	0.1% formic acid water	0.1% formic acid methanol	95% B isocratic elution	-0.00779201	0.16	-0.96	2.22	-1.14	-1.31	-6.4	-0.01	0	-2.98	31.36	-2.3	3	4	3	13	176	1.11e+23	-395507	-20.45	1.27	210.41	219.03	2.34	0	4.34	158	-11.2	301	-58.2	5.35	7.81	4.18	23.28	-2.58	-2.6	8.84	83.6	0	1	1	0
Hypotaurine	0.1% formic acid water	0.1% formic acid methanol	95% B isocratic elution	-0.684831	-0.48	-0.22	3.16	0.71	-1.06	-4.23	1.14	0	-3.61	31.36	-1.5	2	4	2	6	55.5	1110000000000	-429187	-19.14	0.95	136.46	125.99	2.1	0	5.56	129	43.8	272	164	8.05	3.84	8.34	19	-1.9	-2.55	5.19	82.5	0	0	1	1
L-Hydroxyproline	0.1% formic acid water	0.1% formic acid methanol	95% B isocratic elution	-0.249009	0.01	-0.43	2.82	-0.44	-1.27	-4.62	0.18	0	-3.22	31.36	-3.3	3	4	1	9	125	1.11e+17	-299059	-18.75	1.12	155.95	154.27	2.19	0	3.05	140	34.4	301	118	8.1	5.75	7.9	18.5	-1.19	-2.19	3.72	69.6	1	1	1	0
N-omiga-acetylhistamine	0.1% formic acid water	0.1% formic acid methanol	95% B isocratic elution	0.841249	1.04	-0.69	2.28	-0.21	-1.11	-6.17	0.18	0	-3.57	31.36	-0.4	2	2	3	11	138	1.11e+21	-321960	-23.57	0.83	195.51	194.44	2.29	0	4.66	148	58.4	320	214	11.2	4.88	6.06	14.64	-2.8	-2.61	4.77	57.8	1	1	3	0
L-pyroglutamicacid	0.1% formic acid water	0.1% formic acid methanol	95% B isocratic elution	-0.713155	-0.56	-0.33	2.43	-0.14	-1.12	-4.48	0.18	0	-3.41	31.36	-0.8	2	3	1	9	154	1110000000000000	-298326	-20.95	0.96	151.34	146.44	2.17	0	7.17	137	11.3	267	-26.3	6.36	6.48	3.66	21.17	-4.87	-2.3	6.22	66.4	1	1	1	0
Tyramine	0.1% formic acid water	0.1% formic acid methanol	95% B isocratic elution	0.392122	-0.15	-0.53	3.22	-1.06	-0.84	-5.83	-0.01	0	-2.54	31.36	1.1	2	2	2	10	87.3	1.11e+20	-277120	-13.98	0.82	183.62	181.83	2.26	0	2.6	106	27.2	227	168	5.88	3.52	8.82	18.57	0.95	-2.63	3.17	46.2	0	1	1	0
Histamine	0.1% formic acid water	0.1% formic acid methanol	95% B isocratic elution	0.369652	0.91	-0.5	2.94	-0.2	-0.95	-4.89	0.18	0	-3.22	31.36	-0.7	2	2	2	8	64.7	1.11e+16	-226118	-18.32	0.8	155.19	146.49	2.17	0	4.89	122	68.6	307	360	10.5	2.98	8.7	18.47	-1.26	-2.85	4.92	54.7	1	1	3	0
AaC	0.1% formic acid water	0.1% formic acid methanol	95% B isocratic elution	0.943434	0.53	-0.76	2.2	-2.6	-0.46	-6.83	-1.36	0.01	-1.75	31.36	2.6	2	2	0	14	219	1.11e+22	-369670	-14.85	0.86	210.7	216.51	2.34	0	2.51	108	-19	154	-31.5	2.67	3.95	5.78	12.59	0.02	-2.83	2.59	54.7	2	3	3	0
IQx	0.1% formic acid water	0.1% formic acid methanol	95% B isocratic elution	1.00198	0.68	-0.84	0.96	-2.09	-0.9	-6.9	-1.36	0	-2.46	31.36	0.6	1	4	0	15	246	1.11e+23	-414479	-25.04	0.93	218.25	227.81	2.36	0.01	8.8	141	56.1	274	235	9.64	3.08	5.71	14.84	-2.23	-2.75	8.88	69.6	2	3	5	0
8-MeIQx	0.1% formic acid water	0.1% formic acid methanol	95% B isocratic elution	1.17379	0.76	-1	0.92	-2.29	-0.91	-7.55	-1.36	0	-2.35	31.36	1	1	4	0	16	271	1.11e+26	-439162	-25.13	0.98	237.6	249.06	2.4	0.01	7.72	142	63.8	281	265	10.06	2.97	5.88	15.22	-1.59	-1.95	7.78	69.6	2	3	5	0
MeIQ	0.1% formic acid water	0.1% formic acid methanol	95% B isocratic elution	1.27502	0.91	-0.93	1.35	-2.6	-0.66	-7.63	-1.36	0.01	-1.9	31.36	2	1	3	0	16	270	1.11e+27	-429091	-21.18	0.93	236.91	253.92	2.4	0	9.17	124	38.5	216	166	7.22	2.74	7.22	16.13	0.27	-4.33	9.28	56.7	2	3	4	0
IQ[4,5-b]	0.1% formic acid water	0.1% formic acid methanol	95% B isocratic elution	0.975599	0.72	-0.91	0.7	-2.21	-0.89	-7.15	-1.36	0	-2.49	31.36	1.7	1	3	0	15	245	1.11e+24	-404413	-27.45	0.9	223.43	232.81	2.37	0	10.84	139	39.2	269	182	8.87	4.02	6.83	16.69	-0.82	-4.58	11	56.7	2	3	4	0
Harman	0.1% formic acid water	0.1% formic acid methanol	95% B isocratic elution	1.41344	0.97	-0.48	2.69	-2.7	-0.38	-7.04	-1.36	0.01	-1.52	31.36	3.6	1	1	0	14	216	1.11e+23	-359587	-12.73	0.59	214.44	223.28	2.35	0	4.55	81.6	10	132	63.3	3.7	2.33	7.72	16.34	1.94	-4.95	4.58	28.7	2	3	2	0
IQ	0.1% formic acid water	0.1% formic acid methanol	95% B isocratic elution	1.15484	1.03	-0.83	1.43	-2.48	-0.65	-7.14	-1.36	0	-1.98	31.36	1.5	1	3	0	15	245	1.11e+24	-404413	-20.86	0.92	222.22	233.02	2.37	0	8.83	123	32.7	213	148	6.9	2.78	7	15.75	-0.15	-2.69	8.95	56.7	2	3	4	0
Norharman	0.1% formic acid water	0.1% formic acid methanol	95% B isocratic elution	1.198	0.91	-0.5	2.73	-2.49	-0.44	-6.42	-1.36	0.01	-1.74	31.36	3.2	1	1	0	13	193	1.11e+20	-334905	-13.23	0.56	196.55	201.82	2.3	0	4.61	85.1	3.38	142	46.2	3.74	2.88	7.61	16.32	1.37	-4.84	4.64	28.7	2	3	2	0
DMIP	0.1% formic acid water	0.1% formic acid methanol	95% B isocratic elution	1.21027	1.01	-0.75	1.51	-1.16	-0.93	-6.2	-0.59	0	-2.88	31.36	1	1	3	0	12	172	1.11e+21	-332645	-25.27	0.81	195.56	198.01	2.3	0.01	9.99	128	57.4	269	243	9.75	3.19	7.16	17.5	-1.15	-4.24	10.15	56.7	2	2	4	0
Phe-p-1	0.1% formic acid water	0.1% formic acid methanol	95% B isocratic elution	1.4256	0.96	-0.51	2.74	-2.4	-0.37	-6.83	-1.16	0.01	-1.66	31.36	2.3	1	2	1	13	152	1.11e+22	-335660	-12.87	0.73	209.56	213.73	2.33	0	3.22	91.3	4.88	123	51	3.16	1.78	7	14.9	1.32	-6	3.7	38.9	1	2	2	0
7,8-DiMeIQx	0.1% formic acid water	0.1% formic acid methanol	95% B isocratic elution	1.12795	0.85	-1.12	0.84	-2.48	-0.92	-8.13	-1.36	0	-2.23	31.36	1.4	1	4	0	17	297	1.11e+29	-463843	-25.35	1.03	254.55	269.67	2.43	0.01	6.62	143	68.9	284	281	10.44	2.87	6.01	15.48	-1.09	-4.51	6.74	69.6	2	3	5	0
Sarcosine	0.1% formic acid water	0.1% formic acid methanol	95% B isocratic elution	-0.408437	-0.13	-0.21	4.28	0.56	-0.83	-3.85	1.14	0	-3.08	31.36	-2.8	2	3	2	6	52.8	1110000000000	-203238	-12.38	0.78	127.98	113.01	2.05	0	2.92	94.2	17.5	201	42.4	4.57	4.19	4.37	24.65	-2.74	-4.93	8.22	49.3	0	0	1	0
Creatinine	0.1% formic acid water	0.1% formic acid methanol	95% B isocratic elution	0.503961	0.44	-0.16	1.29	0.35	-1.19	-4.42	0.18	0	-3.96	31.36	-1.8	1	1	0	8	151	111000000000000	-248681	-30.05	0.8	143.83	134.46	2.13	0	11.98	146	74.4	333	274	12.86	4.35	5.11	15.98	-5.3	-5.49	12.08	58.7	1	1	3	0
L-dihydrooroticacid	0.1% formic acid water	0.1% formic acid methanol	95% B isocratic elution	-1.83174	-2.48	-0.38	1.72	-0.37	-1.3	-4.81	-0.01	0	-3.54	31.36	-1.5	3	4	1	11	225	1.11e+16	-379565	-23.86	1.38	167.39	163.4	2.21	0.01	5.18	172	-17.2	327	-144	5.51	8.7	2.35	17.25	-6.68	-4.92	4.87	95.5	1	1	2	0
L-Carnosine	0.1% formic acid water	0.1% formic acid methanol	95% B isocratic elution	0.124255	-0.17	-1.09	-0.26	-0.52	-1.9	-7.73	0.18	0	-4.19	31.36	-4	4	5	6	16	259	1.11e+29	-499765	-38.44	1.62	256.29	270.05	2.43	0	12.99	233	51	527	223	14.27	9.82	9.18	20.43	-2.61	-2.2	9.07	121	1	1	4	0
Betaine	0.1% formic acid water	0.1% formic acid methanol	95% B isocratic elution	0.557748	0.55	-0.65	-0.47	1.84	-1.67	-4.77	1.14	0	-5.26	31.36	0.5	0	2	1	8	87.6	1.11e+18	-252565	-41.59	0.81	153.39	154.86	2.19	0	15.35	178	181	468	789	21.46	0.08	1.63	14.25	-9.97	-2.66	15.47	40.1	0	0	1	0
Cytosine	0.1% formic acid water	0.1% formic acid methanol	95% B isocratic elution	0.43406	0.18	0.37	0.33	-0.18	-1.5	-4.19	-0.01	0	-4.11	31.36	-1.7	2	2	0	8	170	1110000000000	-247927	-34.38	0.87	136.73	126.12	2.1	0	12.89	167	25.9	432	122	12.95	9.67	6.77	18.33	-4	-2.61	13.02	67.5	1	1	3	0
Hypoxanthine	0.1% formic acid water	0.1% formic acid methanol	95% B isocratic elution	-0.152875	0.06	0.05	1.31	-0.71	-1.17	-4.55	-0.59	0	-3.53	31.36	-0.5	2	3	0	10	190	11100000000000	-305849	-25.27	0.97	150.2	143.93	2.16	0.01	2.51	159	5.76	351	-26.8	8.83	8.14	3.33	11.33	-6.92	-2.86	2.6	70.1	2	2	4	0
Xanthine	0.1% formic acid water	0.1% formic acid methanol	95% B isocratic elution	-0.619211	-0.32	-0.15	1.37	-0.94	-1.16	-4.8	-0.59	0	-3.33	31.36	-0.7	3	3	0	11	217	111000000000000	-353097	-23.72	1.25	159.89	153.96	2.19	0.01	6.06	170	-15.1	367	-128	7.64	10.2	7.74	22.93	-2.99	-2.73	6.1	86.9	2	2	4	0
Guanine	0.1% formic acid water	0.1% formic acid methanol	95% B isocratic elution	-0.0141467	0.17	0.01	0.35	-0.9	-1.48	-4.96	-0.59	0	-3.79	31.36	-1.1	3	3	0	11	225	1110000000000000	-340610	-30.43	1.22	164.42	158.81	2.2	0.01	3.28	191	-7.34	441	-50.1	10.78	11.63	4.81	13.86	-5.99	-2.81	3.34	96.2	2	2	5	0
Adenine	0.1% formic acid water	0.1% formic acid methanol	95% B isocratic elution	0.906828	0.38	-0.19	0.65	-0.96	-1.27	-4.71	-0.59	0	-3.45	31.36	-0.1	2	4	0	10	127	111000000000000	-293365	-30.51	0.99	153.88	148.09	2.17	0	11.17	161	9.31	380	47.5	10.2	8.73	5.5	15	-4.52	-2.45	11.33	80.5	2	2	5	0
Beta-Thymidine	0.1% formic acid water	0.1% formic acid methanol	95% B isocratic elution	-1.15271	-1.99	-1.14	1.16	-1.94	-1.19	-7.53	-0.97	0	-2.74	31.36	-1.2	3	5	2	17	381	1.11e+30	-549390	-24.52	1.42	246.36	266.66	2.43	0.01	4.01	176	50.1	310	96.6	9.28	5.39	15.53	45.1	-0.93	-3.96	6.43	99.1	1	2	2	0
Cytidine	0.1% formic acid water	0.1% formic acid methanol	95% B isocratic elution	-0.471907	-0.79	-1.08	-2.05	-2.02	-1.86	-7.23	-0.97	0	-3.4	31.36	-2.1	4	5	2	17	383	1.11e+29	-559442	-33.42	1.74	241.37	261.47	2.42	0.01	6.86	228	40.6	467	146	13.35	9.24	15.82	45.67	-2.4	-3.46	9.4	129	1	2	3	0
Inosine	0.1% formic acid water	0.1% formic acid methanol	95% B isocratic elution	-1.28819	-1.34	-1.22	-1.34	-2.52	-1.9	-7.76	-1.55	0	-3.31	31.36	-1.3	4	7	2	19	405	1.11e+30	-617361	-37.38	1.8	261.27	285.84	2.46	0.01	9.42	243	21.5	459	3.18	11.36	10.23	10.31	29.87	-2.75	-2.08	9.18	129	2	3	4	0
Xanthosine	0.1% formic acid water	0.1% formic acid methanol	95% B isocratic elution	-1.16515	-1.28	-1.26	-1.92	-2.45	-1.85	-7.84	-1.55	0	-3.2	31.36	-2.4	5	7	2	20	434	1.11e+31	-664603	-37.75	1.91	265.99	291.82	2.47	0.01	15.45	240	28.5	439	14	11	9.33	12.24	32.43	-2.45	-3.34	12.18	146	2	3	4	0
Guanosine	0.1% formic acid water	0.1% formic acid methanol	95% B isocratic elution	-0.875712	-0.7	-1.39	-2.39	-2.82	-2.12	-8.2	-1.55	0	-3.43	31.36	-1.9	5	7	2	20	446	1.11e+32	-652123	-42.64	2.09	276.17	298.73	2.48	0.01	11.43	271	-5.63	543	-85.9	12.26	14.35	13.14	36.02	-2.86	-2.22	11.13	155	2	3	5	0
Adenosine	0.1% formic acid water	0.1% formic acid methanol	95% B isocratic elution	-0.173116	-0.29	-1.31	0.66	-2.81	-1.13	-7.71	-1.55	0	-2.17	31.36	-1.1	4	8	2	19	335	1.11e+31	-604889	-23.66	1.73	253.58	283.19	2.45	0.01	2.18	191	36.3	322	107	8.99	5.54	14.19	39.95	-0.74	-3.53	3.84	140	2	3	5	0

## Sheet: RF-C
Compounds	Mobile phase A	Mobile phase B	Elution conditions	predicted_values	true_values	ln(gamma)	log(pv)	Total mean interaction energy in the mix (H_int)	H-Bond interaction energy in the mix (H_HB)	VdW interaction energy in the mix (H_vdW)	Gas liquid transition energy in the mix (H_glt)	w_RS	log10(S_RS)	Solvent_MolWeight	XLogP3	Hydrogen Bond Donor Count	Hydrogen Bond Acceptor Count	Rotatable Bond Count	Heavy Atom Count	Complexity	Atomic weights	E_gas	E_diel	Averaging corr dE	Area	Volume	Log(MV)	Total COSMO charge	Dipole moment t_value	Sigma2	Sigma3	Sigma4	Sigma5	H-bond moment (accept)	H-bond moment (donor)	PKA(25,H2O)	PKA(25,MeCN)	logD	WANS*10^5	丨d丨(dipole moment)	Polar Surface Area	Nitrogen Heterocycle Count	Ring Count	Nitrogen Count	Sulfur Count
D-Pantothenic acid	Pure water	Pure methanol	5% B isocratic elution	-0.896275	-0.98	-0.09	1.6	1.29	-2.7	-6.79	1.14	0	-3.82	18.72	-1.1	4	5	6	15	239	1.11e+31	-492236	-26.02	1.56	247.96	269.32	2.43	0	7.46	186	7.26	354	-39.4	8.13	8.95	6.22	23.15	-1.05	-7.18	4.69	107	0	0	1	0
Niacinamide	Pure water	Pure methanol	5% B isocratic elution	0.435412	0.81	0.26	3.02	0.25	-1.35	-4.4	-0.01	0	-2.98	18.72	-0.4	1	2	1	9	114	111000000000000	-261773	-16.8	0.79	152.74	146.35	2.17	0	2.95	112	27.7	215	95.8	7.01	3.68	5.08	12.91	-3.24	-5.1	4.94	56	1	1	2	0
Pyridoxal	Pure water	Pure methanol	5% B isocratic elution	0.536028	1.03	0.89	2.47	0.7	-1.63	-5.16	-0.01	0	-3.01	18.72	0	2	4	2	12	162	1.11e+20	-370806	-16.87	1.08	190.02	193.09	2.29	0.01	3.53	121	8.31	226	-19.7	4.94	5.51	5.04	18.08	-1.4	-2.71	3.58	70.4	1	1	1	0
Pyridoxine	Pure water	Pure methanol	5% B isocratic elution	0.988315	1.43	0.3	1.77	0.21	-1.94	-5.34	-0.01	0	-3.1	18.72	-0.8	3	4	2	12	142	1.11e+22	-371565	-22.39	1.06	195.11	198.18	2.3	0	9.44	137	11.5	264	32	6.46	6.06	11.25	32	0.01	-3.22	2.9	73.6	1	1	1	0
Pyridoxamine	Pure water	Pure methanol	5% B isocratic elution	0.813837	1.22	0.41	2.14	0.28	-2.06	-5.53	-0.01	0	-3.07	18.72	-1	3	4	2	12	143	1.11e+23	-359090	-19.85	1.23	199.15	205.79	2.31	0.01	2.37	144	49.5	321	233	9.73	4.96	8.51	18.04	-0.23	-3.37	4.35	79.4	1	1	2	0
Nicotinic acid	Pure water	Pure methanol	5% B isocratic elution	0.270119	0.6	1.1	3.56	0.73	-1.23	-4.01	-0.01	0	-2.86	18.72	0.4	1	3	1	9	114	11100000000000	-274248	-12.08	0.77	149.15	142	2.15	0	0.88	92.9	1.16	177	-39.1	3.37	4.37	3.73	20.67	-2.73	-2.8	3.67	50.2	1	1	1	0
Alanine	Pure water	Pure methanol	5% B isocratic elution	-0.140113	0.13	0.61	3.79	1.39	-1.45	-3.28	1.14	0	-3.31	18.72	-3	2	3	1	6	61.8	1110000000000	-203245	-12.07	0.88	123.86	112.49	2.05	0	1.93	103	20.6	223	81.1	5.25	4.15	6.92	15.51	-0.69	-4.07	2.88	63.3	0	0	1	0
Leucine	Pure water	Pure methanol	5% B isocratic elution	0.336797	0.56	1.54	3.98	2.19	-1.28	-4.98	1.14	0	-3.37	18.72	-1.5	2	3	3	9	101	1.11e+21	-277279	-11.49	0.91	176.64	178.51	2.25	0	1.75	97.3	10	188	15.9	4.1	4.03	4.32	23.12	-1.46	-4.42	4.6	63.3	0	0	1	0
Isoleucine	Pure water	Pure methanol	5% B isocratic elution	0.334583	0.62	1.54	3.99	2.17	-1.24	-4.94	1.14	0	-3.33	18.72	-1.7	2	3	3	9	103	1.11e+21	-277278	-11.39	0.9	174.76	177.8	2.25	0	1.86	95.2	4.07	178	-13.2	3.66	4.06	5.29	24.73	-0.48	-4.81	8.21	63.3	0	0	1	0
Valine	Pure water	Pure methanol	5% B isocratic elution	0.229604	0.55	0.76	3.48	2.07	-0.91	-4.4	1.14	0	-3.45	18.72	-2.3	2	3	2	8	90.4	1.11e+18	-252603	-16.64	0.58	154.87	154.22	2.19	0	7.95	86.9	30.2	126	74.6	3.87	1.16	5.48	13.49	-1.89	-5.23	8.12	63.3	0	0	1	0
Proline	Pure water	Pure methanol	5% B isocratic elution	0.353723	0.72	0.86	3.62	0.74	-1.34	-4.07	0.18	0	-2.99	18.72	-2.5	2	3	1	8	103	1.11e+16	-251835	-13.13	0.77	147.6	142.26	2.15	0	3.61	94.9	18	192	36.7	4.47	4	3.51	21.36	-3.35	-4.13	3.48	49.3	1	1	1	0
Phenylalanine	Pure water	Pure methanol	5% B isocratic elution	0.220424	0.48	0.96	2.97	1.09	-1.37	-5.64	-0.01	0	-3.13	18.72	-1.5	2	3	3	12	153	1.11e+22	-348280	-15.74	1.01	200.74	208.03	2.32	0	2.66	122	9.49	216	30.8	4.48	4.38	4.16	22.91	-1.94	-2.63	7.78	63.3	0	1	1	0
Methionine	Pure water	Pure methanol	5% B isocratic elution	-0.0432006	0.35	0.86	3.26	1.8	-1.47	-5.4	1.14	0	-3.47	18.72	-1.9	2	4	4	9	97	1.11e+19	-502501	-15.83	1.08	186.45	185.96	2.27	0.01	4.25	126	19.1	229	42.1	4.86	4.41	4.94	22.93	-1.51	-3.09	4.05	88.6	0	0	1	1
Tryptophan	Pure water	Pure methanol	5% B isocratic elution	-0.181069	0.11	0.43	1.74	0.45	-1.58	-6.61	-0.59	0	-3.06	18.72	-1.1	3	3	3	15	245	1.11e+26	-430876	-21.02	1.24	233.33	250.05	2.4	0	5.34	153	-10.6	271	-20.2	4.73	6.7	4.11	22.25	-1.98	-4.08	5.74	79.1	1	2	2	0
Serine	Pure water	Pure methanol	5% B isocratic elution	-0.434569	-0.33	0.37	2.82	1.27	-1.52	-3.4	1.14	0	-3.36	18.72	-3.1	3	4	2	7	72.6	11100000000000	-250467	-14.94	1.06	132.32	122.02	2.09	0	3.06	118	4.07	216	-33.2	4.49	4.85	3.58	19.55	-4.08	-3.26	0.99	83.6	0	0	1	0
Glutamine	Pure water	Pure methanol	5% B isocratic elution	-0.474376	-0.3	-0.44	1.53	0.79	-2.35	-4.86	1.14	0	-3.79	18.72	-3.1	3	4	4	10	146	1.11e+19	-333835	-24.89	1.35	180.5	176.05	2.25	0	6.95	174	25	351	64	9.61	7.18	5.6	22.19	-3.61	-5.52	7.53	106	0	0	2	0
Threonine	Pure water	Pure methanol	5% B isocratic elution	-0.278276	-0.09	0.7	3.49	1.49	-1.57	-3.93	1.14	0	-3.33	18.72	-2.9	3	4	2	8	93.3	1.11e+16	-275147	-14.56	1.14	149.43	144.38	2.16	0.01	4	119	6.4	228	-10.9	5.24	4.98	2.45	17.53	-4.59	-5.42	3.68	83.6	0	0	1	0
Cysteine	Pure water	Pure methanol	5% B isocratic elution	-0.676293	-0.58	0.72	3.62	1.43	-1.15	-4.26	1.14	0	-3.18	18.72	-2.5	3	4	2	7	75.3	11100000000000	-453148	-13.45	1	147.18	141.36	2.15	0.01	3.06	108	-15.6	173	-97.6	1.79	4.69	5.27	20.11	-1.25	-3.34	5	64.3	0	0	1	1
Asparagine	Pure water	Pure methanol	5% B isocratic elution	-0.580684	-0.54	-0.64	2.07	0.53	-2.37	-4.22	1.14	0	-3.81	18.72	-3.4	3	4	3	9	134	1.11e+16	-309157	-24.85	1.33	160.84	155.26	2.19	0	3.88	177	14.7	352	34.5	9.05	7.57	3.77	19.29	-6.05	-4.96	6.4	106	0	0	2	0
Glutamicacid	Pure water	Pure methanol	5% B isocratic elution	-0.531812	-0.38	-0.26	2.12	1.3	-1.8	-4.49	1.14	0	-3.84	18.72	-3.7	3	5	4	10	145	1.11e+18	-346311	-25.1	1.06	172.73	167.41	2.22	0	8.05	150	9.3	247	-26.7	4.8	5.32	4.16	20.54	-4.48	-4.16	4.84	101	0	0	1	1
Lysine	Pure water	Pure methanol	5% B isocratic elution	0.00150537	0.35	0.19	2.83	1.88	-1.54	-5.45	1.14	0	-3.76	18.72	-3	3	4	5	10	106	1.11e+23	-312026	-21.17	0.86	191.1	191.01	2.28	0	5.99	127	75.3	255	325	8.64	1.15	8.95	18.74	-1	-1.73	0.96	89.3	0	0	2	0
Arginine	Pure water	Pure methanol	5% B isocratic elution	0.382819	0.93	-0.69	1.47	1.06	-2.13	-6.08	1.14	0	-3.87	18.72	-4.2	4	4	5	12	176	1.11e+25	-380778	-28.48	1.38	214.93	214.24	2.33	0	9.11	182	56.4	339	241	10.62	3.9	10.66	22.26	-2.7	-2.93	1.97	128	0	0	4	0
Histidine	Pure water	Pure methanol	5% B isocratic elution	0.233568	0.64	-0.71	1.3	0.22	-1.84	-4.99	0.18	0	-3.56	18.72	-3.2	3	4	3	11	151	1.11e+19	-344509	-27.47	0.98	180.91	181.77	2.26	0	5.04	160	36.7	296	139	8.38	4.38	5.7	14.6	-3.9	-4.52	8.26	92	1	1	3	0
Citrulline	Pure water	Pure methanol	5% B isocratic elution	-0.584775	-0.34	-0.79	1.3	0.74	-2.82	-5.87	1.14	0	-4.05	18.72	-4.3	4	4	5	12	171	1.11e+24	-393268	-29.64	1.53	214.73	215.15	2.33	0	7.6	204	40.5	433	151	12.42	8.36	5.05	24.14	-4.38	-3.03	2.31	118	0	0	3	0
Taurine	Pure water	Pure methanol	5% B isocratic elution	-0.961464	-1.07	-0.08	3.08	1.15	-1.73	-3.64	1.14	0	-3.6	18.72	-4.1	2	4	2	7	120	11100000000000	-476406	-18.56	1.09	143.51	133.49	2.13	0.01	3.57	138	-7.89	285	-71.8	4.16	6.16	-2.47	10.55	-10.36	-3.86	3.47	88.8	0	0	1	1
Tyrosine	Pure water	Pure methanol	5% B isocratic elution	0.282556	0.42	0.16	2.22	0.47	-2.06	-5.71	-0.01	0	-3.3	18.72	-2.3	3	4	3	13	176	1.11e+23	-395507	-20.45	1.27	210.41	219.03	2.34	0	4.34	158	-11.2	301	-58.2	5.35	7.81	4.18	23.28	-2.58	-2.6	8.84	83.6	0	1	1	0
Hypotaurine	Pure water	Pure methanol	5% B isocratic elution	-0.685149	-0.77	-0.13	3.16	0.77	-1.82	-3.8	1.14	0	-3.47	18.72	-1.5	2	4	2	6	55.5	1110000000000	-429187	-19.14	0.95	136.46	125.99	2.1	0	5.56	129	43.8	272	164	8.05	3.84	8.34	19	-1.9	-2.55	5.19	82.5	0	0	1	1
L-Hydroxyproline	Pure water	Pure methanol	5% B isocratic elution	-0.208158	-0.08	-0.01	2.82	0.08	-2.1	-4.12	0.18	0	-3.23	18.72	-3.3	3	4	1	9	125	1.11e+17	-299059	-18.75	1.12	155.95	154.27	2.19	0	3.05	140	34.4	301	118	8.1	5.75	7.9	18.5	-1.19	-2.19	3.72	69.6	1	1	1	0
N-omiga-acetylhistamine	Pure water	Pure methanol	5% B isocratic elution	1.06901	1.46	-0.37	2.28	0.45	-1.97	-5.69	0.18	0	-3.54	18.72	-0.4	2	2	3	11	138	1.11e+21	-321960	-23.57	0.83	195.51	194.44	2.29	0	4.66	148	58.4	320	214	11.2	4.88	6.06	14.64	-2.8	-2.61	4.77	57.8	1	1	3	0
L-pyroglutamic acid	Pure water	Pure methanol	5% B isocratic elution	-0.657515	-0.41	-0.15	2.43	0.17	-1.85	-3.98	0.18	0	-3.31	18.72	-0.8	2	3	1	9	154	1110000000000000	-298326	-20.95	0.96	151.34	146.44	2.17	0	7.17	137	11.3	267	-26.3	6.36	6.48	3.66	21.17	-4.87	-2.3	6.22	66.4	1	1	1	0
Tyramine	Pure water	Pure methanol	5% B isocratic elution	0.34245	0.61	1.07	3.22	0.89	-1.34	-5.33	-0.01	0	-3.06	18.72	1.1	2	2	2	10	87.3	1.11e+20	-277120	-13.98	0.82	183.62	181.83	2.26	0	2.6	106	27.2	227	168	5.88	3.52	8.82	18.57	0.95	-2.63	3.17	46.2	0	1	1	0
Histamine	Pure water	Pure methanol	5% B isocratic elution	0.287993	-0.22	-0.06	2.94	0.39	-1.64	-4.52	0.18	0	-3.23	18.72	-0.7	2	2	2	8	64.7	1.11e+16	-226118	-18.32	0.8	155.19	146.49	2.17	0	4.89	122	68.6	307	360	10.5	2.98	8.7	18.47	-1.26	-2.85	4.92	54.7	1	1	3	0
IQx	Pure water	Pure methanol	5% B isocratic elution	0.586781	0.31	0.06	0.96	-0.6	-1.65	-6.32	-1.36	0	-2.68	18.72	0.6	1	4	0	15	246	1.11e+23	-414479	-25.04	0.93	218.25	227.81	2.36	0.01	8.8	141	56.1	274	235	9.64	3.08	5.71	14.84	-2.23	-2.75	8.88	69.6	2	3	5	0
DMIP	Pure water	Pure methanol	5% B isocratic elution	0.955285	1.05	-0.01	1.51	0.03	-1.64	-5.7	-0.59	0	-3.03	18.72	1	1	3	0	12	172	1.11e+21	-332645	-25.27	0.81	195.56	198.01	2.3	0.01	9.99	128	57.4	269	243	9.75	3.19	7.16	17.5	-1.15	-4.24	10.15	56.7	2	2	4	0
Sarcosine	Pure water	Pure methanol	5% B isocratic elution	-0.137696	0.13	0.78	4.28	1.53	-1.36	-3.42	1.14	0	-3.34	18.72	-2.8	2	3	2	6	52.8	1110000000000	-203238	-12.38	0.78	127.98	113.01	2.05	0	2.92	94.2	17.5	201	42.4	4.57	4.19	4.37	24.65	-2.74	-4.93	8.22	49.3	0	0	1	0
Creatinine	Pure water	Pure methanol	5% B isocratic elution	0.860175	1.49	-0.93	1.29	-0.34	-2.09	-4.1	0.18	0	-3.46	18.72	-1.8	1	1	0	8	151	111000000000000	-248681	-30.05	0.8	143.83	134.46	2.13	0	11.98	146	74.4	333	274	12.86	4.35	5.11	15.98	-5.3	-5.49	12.08	58.7	1	1	3	0
L-dihydroorotic acid	Pure water	Pure methanol	5% B isocratic elution	-1.69626	-1.22	-0.45	1.72	-0.25	-2.16	-4.21	-0.01	0	-3.34	18.72	-1.5	3	4	1	11	225	1.11e+16	-379565	-23.86	1.38	167.39	163.4	2.21	0.01	5.18	172	-17.2	327	-144	5.51	8.7	2.35	17.25	-6.68	-4.92	4.87	95.5	1	1	2	0
L-Carnosine	Pure water	Pure methanol	5% B isocratic elution	-0.0585963	0.22	-1.25	-0.26	-0.1	-3.18	-6.99	0.18	0	-3.94	18.72	-4	4	5	6	16	259	1.11e+29	-499765	-38.44	1.62	256.29	270.05	2.43	0	12.99	233	51	527	223	14.27	9.82	9.18	20.43	-2.61	-2.2	9.07	121	1	1	4	0
Betaine	Pure water	Pure methanol	5% B isocratic elution	0.726812	1.31	-2.41	-0.47	0.29	-2.8	-4.41	1.14	0	-4.33	18.72	0.5	0	2	1	8	87.6	1.11e+18	-252565	-41.59	0.81	153.39	154.86	2.19	0	15.35	178	181	468	789	21.46	0.08	1.63	14.25	-9.97	-2.66	15.47	40.1	0	0	1	0
Cytosine	Pure water	Pure methanol	5% B isocratic elution	0.786962	1.52	-0.82	0.33	-1.14	-2.46	-3.89	-0.01	0	-3.42	18.72	-1.7	2	2	0	8	170	1110000000000	-247927	-34.38	0.87	136.73	126.12	2.1	0	12.89	167	25.9	432	122	12.95	9.67	6.77	18.33	-4	-2.61	13.02	67.5	1	1	3	0
Hypoxanthine	Pure water	Pure methanol	5% B isocratic elution	0.0199514	-0.02	-0.64	1.31	-1.16	-2.05	-4.14	-0.59	0	-3.06	18.72	-0.5	2	3	0	10	190	11100000000000	-305849	-25.27	0.97	150.2	143.93	2.16	0.01	2.51	159	5.76	351	-26.8	8.83	8.14	3.33	11.33	-6.92	-2.86	2.6	70.1	2	2	4	0
Xanthine	Pure water	Pure methanol	5% B isocratic elution	-0.563996	-0.9	-0.53	1.37	-1.1	-2.05	-4.37	-0.59	0	-2.99	18.72	-0.7	3	3	0	11	217	111000000000000	-353097	-23.72	1.25	159.89	153.96	2.19	0.01	6.06	170	-15.1	367	-128	7.64	10.2	7.74	22.93	-2.99	-2.73	6.1	86.9	2	2	4	0
Guanine	Pure water	Pure methanol	5% B isocratic elution	0.20701	0.52	-1.02	0.35	-1.62	-2.53	-4.56	-0.59	0	-3.17	18.72	-1.1	3	3	0	11	225	1110000000000000	-340610	-30.43	1.22	164.42	158.81	2.2	0.01	3.28	191	-7.34	441	-50.1	10.78	11.63	4.81	13.86	-5.99	-2.81	3.34	96.2	2	2	5	0
Adenine	Pure water	Pure methanol	5% B isocratic elution	0.875941	1.24	-0.84	0.65	-1.29	-2.17	-4.34	-0.59	0	-3	18.72	-0.1	2	4	0	10	127	111000000000000	-293365	-30.51	0.99	153.88	148.09	2.17	0	11.17	161	9.31	380	47.5	10.2	8.73	5.5	15	-4.52	-2.45	11.33	80.5	2	2	5	0
Cytidine	Pure water	Pure methanol	5% B isocratic elution	-0.574961	-0.09	-1.13	-2.05	-1.54	-3.15	-6.51	-0.97	0	-3.21	18.72	-2.1	4	5	2	17	383	1.11e+29	-559442	-33.42	1.74	241.37	261.47	2.42	0.01	6.86	228	40.6	467	146	13.35	9.24	15.82	45.67	-2.4	-3.46	9.4	129	1	2	3	0
Inosine	Pure water	Pure methanol	5% B isocratic elution	-1.38753	-2.24	-1.35	-1.34	-1.98	-3.26	-6.93	-1.55	0	-3.09	18.72	-1.3	4	7	2	19	405	1.11e+30	-617361	-37.38	1.8	261.27	285.84	2.46	0.01	9.42	243	21.5	459	3.18	11.36	10.23	10.31	29.87	-2.75	-2.08	9.18	129	2	3	4	0
Xanthosine	Pure water	Pure methanol	5% B isocratic elution	-1.20011	-1.56	-1.16	-1.92	-1.7	-3.18	-6.96	-1.55	0	-3.07	18.72	-2.4	5	7	2	20	434	1.11e+31	-664603	-37.75	1.91	265.99	291.82	2.47	0.01	15.45	240	28.5	439	14	11	9.33	12.24	32.43	-2.45	-3.34	12.18	146	2	3	4	0
Guanosine	Pure water	Pure methanol	5% B isocratic elution	-0.827939	-0.85	-1.67	-2.39	-2.33	-3.56	-7.37	-1.55	0	-3.14	18.72	-1.9	5	7	2	20	446	1.11e+32	-652123	-42.64	2.09	276.17	298.73	2.48	0.01	11.43	271	-5.63	543	-85.9	12.26	14.35	13.14	36.02	-2.86	-2.22	11.13	155	2	3	5	0
Uridine	Pure water	Pure methanol	5% B isocratic elution	-1.0972	-1.54	-0.27	-0.25	-0.45	-2.21	-6.23	-0.97	0	-3.04	18.72	-2	4	6	2	17	371	1.11e+28	-571934	-25.98	1.71	235.87	256.94	2.41	0.01	5.57	194	28.6	328	37.3	8.29	6.3	11.64	34.25	-0.98	-1.56	4.28	119	1	2	2	0
Adenosine	Pure water	Pure methanol	5% B isocratic elution	0.0471135	0.42	-0.07	0.66	-0.9	-2.1	-6.97	-1.55	0	-2.53	18.72	-1.1	4	8	2	19	335	1.11e+31	-604889	-23.66	1.73	253.58	283.19	2.45	0.01	2.18	191	36.3	322	107	8.99	5.54	14.19	39.95	-0.74	-3.53	3.84	140	2	3	5	0
D-Pantothenic acid	Pure water	Pure methanol	20% B isocratic elution	-0.912406	-0.93	-0.99	1.6	0.55	-2.4	-7.07	1.14	0	-3.46	20.82	-1.1	4	5	6	15	239	1.11e+31	-492236	-26.02	1.56	247.96	269.32	2.43	0	7.46	186	7.26	354	-39.4	8.13	8.95	6.22	23.15	-1.05	-7.18	4.69	107	0	0	1	0
Niacinamide	Pure water	Pure methanol	20% B isocratic elution	0.426212	0.6	-0.22	3.02	-0.1	-1.18	-4.54	-0.01	0	-2.8	20.82	-0.4	1	2	1	9	114	111000000000000	-261773	-16.8	0.79	152.74	146.35	2.17	0	2.95	112	27.7	215	95.8	7.01	3.68	5.08	12.91	-3.24	-5.1	4.94	56	1	1	2	0
Pyridoxal	Pure water	Pure methanol	20% B isocratic elution	0.55347	0.99	0.03	2.47	-0.03	-1.45	-5.4	-0.01	0	-2.67	20.82	0	2	4	2	12	162	1.11e+20	-370806	-16.87	1.08	190.02	193.09	2.29	0.01	3.53	121	8.31	226	-19.7	4.94	5.51	5.04	18.08	-1.4	-2.71	3.58	70.4	1	1	1	0
Pyridoxine	Pure water	Pure methanol	20% B isocratic elution	1.05787	1.41	-0.44	1.77	-0.39	-1.74	-5.57	-0.01	0	-2.82	20.82	-0.8	3	4	2	12	142	1.11e+22	-371565	-22.39	1.06	195.11	198.18	2.3	0	9.44	137	11.5	264	32	6.46	6.06	11.25	32	0.01	-3.22	2.9	73.6	1	1	1	0
Pyridoxamine	Pure water	Pure methanol	20% B isocratic elution	0.874457	1.2	-0.35	2.14	-0.34	-1.84	-5.75	-0.01	0	-2.77	20.82	-1	3	4	2	12	143	1.11e+23	-359090	-19.85	1.23	199.15	205.79	2.31	0.01	2.37	144	49.5	321	233	9.73	4.96	8.51	18.04	-0.23	-3.37	4.35	79.4	1	1	2	0
Nicotinic acid	Pure water	Pure methanol	20% B isocratic elution	0.247148	0.44	0.38	3.56	0.11	-1.11	-4.21	-0.01	0	-2.58	20.82	0.4	1	3	1	9	114	11100000000000	-274248	-12.08	0.77	149.15	142	2.15	0	0.88	92.9	1.16	177	-39.1	3.37	4.37	3.73	20.67	-2.73	-2.8	3.67	50.2	1	1	1	0
Alanine	Pure water	Pure methanol	20% B isocratic elution	-0.145556	0.05	0.1	3.79	1.03	-1.3	-3.42	1.14	0	-3.12	20.82	-3	2	3	1	6	61.8	1110000000000	-203245	-12.07	0.88	123.86	112.49	2.05	0	1.93	103	20.6	223	81.1	5.25	4.15	6.92	15.51	-0.69	-4.07	2.88	63.3	0	0	1	0
Leucine	Pure water	Pure methanol	20% B isocratic elution	0.327127	0.45	0.58	3.98	1.36	-1.14	-5.16	1.14	0	-2.98	20.82	-1.5	2	3	3	9	101	1.11e+21	-277279	-11.49	0.91	176.64	178.51	2.25	0	1.75	97.3	10	188	15.9	4.1	4.03	4.32	23.12	-1.46	-4.42	4.6	63.3	0	0	1	0
Isoleucine	Pure water	Pure methanol	20% B isocratic elution	0.330213	0.47	0.58	3.99	1.34	-1.1	-5.11	1.14	0	-2.95	20.82	-1.7	2	3	3	9	103	1.11e+21	-277278	-11.39	0.9	174.76	177.8	2.25	0	1.86	95.2	4.07	178	-13.2	3.66	4.06	5.29	24.73	-0.48	-4.81	8.21	63.3	0	0	1	0
Valine	Pure water	Pure methanol	20% B isocratic elution	0.195278	0.36	0.11	3.48	1.57	-0.79	-4.55	1.14	0	-3.2	20.82	-2.3	2	3	2	8	90.4	1.11e+18	-252603	-16.64	0.58	154.87	154.22	2.19	0	7.95	86.9	30.2	126	74.6	3.87	1.16	5.48	13.49	-1.89	-5.23	8.12	63.3	0	0	1	0
Proline	Pure water	Pure methanol	20% B isocratic elution	0.346734	0.46	0.19	3.62	0.22	-1.19	-4.23	0.18	0	-2.74	20.82	-2.5	2	3	1	8	103	1.11e+16	-251835	-13.13	0.77	147.6	142.26	2.15	0	3.61	94.9	18	192	36.7	4.47	4	3.51	21.36	-3.35	-4.13	3.48	49.3	1	1	1	0
Phenylalanine	Pure water	Pure methanol	20% B isocratic elution	0.200973	0.34	0.05	2.97	0.3	-1.22	-5.87	-0.01	0	-2.77	20.82	-1.5	2	3	3	12	153	1.11e+22	-348280	-15.74	1.01	200.74	208.03	2.32	0	2.66	122	9.49	216	30.8	4.48	4.38	4.16	22.91	-1.94	-2.63	7.78	63.3	0	1	1	0
Methionine	Pure water	Pure methanol	20% B isocratic elution	-0.046963	0.16	0.04	3.26	1.12	-1.31	-5.61	1.14	0	-3.15	20.82	-1.9	2	4	4	9	97	1.11e+19	-502501	-15.83	1.08	186.45	185.96	2.27	0.01	4.25	126	19.1	229	42.1	4.86	4.41	4.94	22.93	-1.51	-3.09	4.05	88.6	0	0	1	1
Tryptophan	Pure water	Pure methanol	20% B isocratic elution	-0.208317	-0.04	-0.5	1.74	-0.39	-1.42	-6.86	-0.59	0	-2.69	20.82	-1.1	3	3	3	15	245	1.11e+26	-430876	-21.02	1.24	233.33	250.05	2.4	0	5.34	153	-10.6	271	-20.2	4.73	6.7	4.11	22.25	-1.98	-4.08	5.74	79.1	1	2	2	0
Serine	Pure water	Pure methanol	20% B isocratic elution	-0.439243	-0.35	-0.11	2.82	0.95	-1.35	-3.57	1.14	0	-3.19	20.82	-3.1	3	4	2	7	72.6	11100000000000	-250467	-14.94	1.06	132.32	122.02	2.09	0	3.06	118	4.07	216	-33.2	4.49	4.85	3.58	19.55	-4.08	-3.26	0.99	83.6	0	0	1	0
Glutamine	Pure water	Pure methanol	20% B isocratic elution	-0.486338	-0.54	-0.83	1.53	0.57	-2.08	-5.04	1.14	0	-3.65	20.82	-3.1	3	4	4	10	146	1.11e+19	-333835	-24.89	1.35	180.5	176.05	2.25	0	6.95	174	25	351	64	9.61	7.18	5.6	22.19	-3.61	-5.52	7.53	106	0	0	2	0
Threonine	Pure water	Pure methanol	20% B isocratic elution	-0.276218	-0.32	0.05	3.49	0.99	-1.39	-4.11	1.14	0	-3.08	20.82	-2.9	3	4	2	8	93.3	1.11e+16	-275147	-14.56	1.14	149.43	144.38	2.16	0.01	4	119	6.4	228	-10.9	5.24	4.98	2.45	17.53	-4.59	-5.42	3.68	83.6	0	0	1	0
Cysteine	Pure water	Pure methanol	20% B isocratic elution	-0.693316	-0.83	0.07	3.62	0.9	-1.02	-4.45	1.14	0	-2.93	20.82	-2.5	3	4	2	7	75.3	11100000000000	-453148	-13.45	1	147.18	141.36	2.15	0.01	3.06	108	-15.6	173	-97.6	1.79	4.69	5.27	20.11	-1.25	-3.34	5	64.3	0	0	1	1
Asparagine	Pure water	Pure methanol	20% B isocratic elution	-0.581538	-0.79	-0.83	2.07	0.51	-2.11	-4.39	1.14	0	-3.76	20.82	-3.4	3	4	3	9	134	1.11e+16	-309157	-24.85	1.33	160.84	155.26	2.19	0	3.88	177	14.7	352	34.5	9.05	7.57	3.77	19.29	-6.05	-4.96	6.4	106	0	0	2	0
Glutamicacid	Pure water	Pure methanol	20% B isocratic elution	-0.582738	-0.69	-0.66	2.12	1.07	-1.6	-4.69	1.14	0	-3.71	20.82	-3.7	3	5	4	10	145	1.11e+18	-346311	-25.1	1.06	172.73	167.41	2.22	0	8.05	150	9.3	247	-26.7	4.8	5.32	4.16	20.54	-4.48	-4.16	4.84	101	0	0	1	1
Lysine	Pure water	Pure methanol	20% B isocratic elution	-0.00826654	0.27	-0.46	2.83	1.4	-1.35	-5.61	1.14	0	-3.51	20.82	-3	3	4	5	10	106	1.11e+23	-312026	-21.17	0.86	191.1	191.01	2.28	0	5.99	127	75.3	255	325	8.64	1.15	8.95	18.74	-1	-1.73	0.96	89.3	0	0	2	0
Arginine	Pure water	Pure methanol	20% B isocratic elution	0.418513	0.83	-1.16	1.47	0.82	-1.86	-6.25	1.14	0	-3.7	20.82	-4.2	4	4	5	12	176	1.11e+25	-380778	-28.48	1.38	214.93	214.24	2.33	0	9.11	182	56.4	339	241	10.62	3.9	10.66	22.26	-2.7	-2.93	1.97	128	0	0	4	0
Histidine	Pure water	Pure methanol	20% B isocratic elution	0.248353	0.61	-0.98	1.3	0.09	-1.62	-5.16	0.18	0	-3.47	20.82	-3.2	3	4	3	11	151	1.11e+19	-344509	-27.47	0.98	180.91	181.77	2.26	0	5.04	160	36.7	296	139	8.38	4.38	5.7	14.6	-3.9	-4.52	8.26	92	1	1	3	0
Citrulline	Pure water	Pure methanol	20% B isocratic elution	-0.586427	-0.63	-1.23	1.3	0.48	-2.51	-6.07	1.14	0	-3.9	20.82	-4.3	4	4	5	12	171	1.11e+24	-393268	-29.64	1.53	214.73	215.15	2.33	0	7.6	204	40.5	433	151	12.42	8.36	5.05	24.14	-4.38	-3.03	2.31	118	0	0	3	0
Taurine	Pure water	Pure methanol	20% B isocratic elution	-0.98645	-1.38	-0.45	3.08	0.92	-1.56	-3.82	1.14	0	-3.47	20.82	-4.1	2	4	2	7	120	11100000000000	-476406	-18.56	1.09	143.51	133.49	2.13	0.01	3.57	138	-7.89	285	-71.8	4.16	6.16	-2.47	10.55	-10.36	-3.86	3.47	88.8	0	0	1	1
Tyrosine	Pure water	Pure methanol	20% B isocratic elution	0.314832	0.48	-0.61	2.22	-0.19	-1.85	-5.96	-0.01	0	-3	20.82	-2.3	3	4	3	13	176	1.11e+23	-395507	-20.45	1.27	210.41	219.03	2.34	0	4.34	158	-11.2	301	-58.2	5.35	7.81	4.18	23.28	-2.58	-2.6	8.84	83.6	0	1	1	0
Hypotaurine	Pure water	Pure methanol	20% B isocratic elution	-0.71222	-1.06	-0.42	3.16	0.65	-1.61	-3.95	1.14	0	-3.38	20.82	-1.5	2	4	2	6	55.5	1110000000000	-429187	-19.14	0.95	136.46	125.99	2.1	0	5.56	129	43.8	272	164	8.05	3.84	8.34	19	-1.9	-2.55	5.19	82.5	0	0	1	1
L-Hydroxyproline	Pure water	Pure methanol	20% B isocratic elution	-0.213793	-0.34	-0.46	2.82	-0.22	-1.88	-4.3	0.18	0	-3.07	20.82	-3.3	3	4	1	9	125	1.11e+17	-299059	-18.75	1.12	155.95	154.27	2.19	0	3.05	140	34.4	301	118	8.1	5.75	7.9	18.5	-1.19	-2.19	3.72	69.6	1	1	1	0
N-omiga-acetylhistamine	Pure water	Pure methanol	20% B isocratic elution	1.15948	1.48	-0.87	2.28	0.07	-1.75	-5.86	0.18	0	-3.36	20.82	-0.4	2	2	3	11	138	1.11e+21	-321960	-23.57	0.83	195.51	194.44	2.29	0	4.66	148	58.4	320	214	11.2	4.88	6.06	14.64	-2.8	-2.61	4.77	57.8	1	1	3	0
L-pyroglutamic acid	Pure water	Pure methanol	20% B isocratic elution	-0.678716	-0.72	-0.51	2.43	-0.05	-1.65	-4.16	0.18	0	-3.19	20.82	-0.8	2	3	1	9	154	1110000000000000	-298326	-20.95	0.96	151.34	146.44	2.17	0	7.17	137	11.3	267	-26.3	6.36	6.48	3.66	21.17	-4.87	-2.3	6.22	66.4	1	1	1	0
Tyramine	Pure water	Pure methanol	20% B isocratic elution	0.345874	0.6	0.21	3.22	0.15	-1.21	-5.51	-0.01	0	-2.72	20.82	1.1	2	2	2	10	87.3	1.11e+20	-277120	-13.98	0.82	183.62	181.83	2.26	0	2.6	106	27.2	227	168	5.88	3.52	8.82	18.57	0.95	-2.63	3.17	46.2	0	1	1	0
Histamine	Pure water	Pure methanol	20% B isocratic elution	0.30679	-0.2	-0.51	2.94	0.07	-1.47	-4.65	0.18	0	-3.07	20.82	-0.7	2	2	2	8	64.7	1.11e+16	-226118	-18.32	0.8	155.19	146.49	2.17	0	4.89	122	68.6	307	360	10.5	2.98	8.7	18.47	-1.26	-2.85	4.92	54.7	1	1	3	0
IQx	Pure water	Pure methanol	20% B isocratic elution	0.91667	1.31	-0.65	0.96	-1.21	-1.45	-6.52	-1.36	0	-2.41	20.82	0.6	1	4	0	15	246	1.11e+23	-414479	-25.04	0.93	218.25	227.81	2.36	0.01	8.8	141	56.1	274	235	9.64	3.08	5.71	14.84	-2.23	-2.75	8.88	69.6	2	3	5	0
8-MeIQx	Pure water	Pure methanol	20% B isocratic elution	0.864781	1.22	-0.61	0.92	-1.13	-1.48	-7.15	-1.36	0	-2.38	20.82	1	1	4	0	16	271	1.11e+26	-439162	-25.13	0.98	237.6	249.06	2.4	0.01	7.72	142	63.8	281	265	10.06	2.97	5.88	15.22	-1.59	-1.95	7.78	69.6	2	3	5	0
IQ[4,5-b]	Pure water	Pure methanol	20% B isocratic elution	0.953941	1.13	-0.68	0.7	-1.23	-1.39	-6.77	-1.36	0	-2.45	20.82	1.7	1	3	0	15	245	1.11e+24	-404413	-27.45	0.9	223.43	232.81	2.37	0	10.84	139	39.2	269	182	8.87	4.02	6.83	16.69	-0.82	-4.58	11	56.7	2	3	4	0
IQ	Pure water	Pure methanol	20% B isocratic elution	1.05628	1.35	-0.2	1.43	-1.13	-1.07	-6.76	-1.36	0	-2.12	20.82	1.5	1	3	0	15	245	1.11e+24	-404413	-20.86	0.92	222.22	233.02	2.37	0	8.83	123	32.7	213	148	6.9	2.78	7	15.75	-0.15	-2.69	8.95	56.7	2	3	4	0
Norharman	Pure water	Pure methanol	20% B isocratic elution	0.978282	0.93	0.45	2.73	-0.87	-0.67	-6.08	-1.36	0	-2.01	20.82	3.2	1	1	0	13	193	1.11e+20	-334905	-13.23	0.56	196.55	201.82	2.3	0	4.61	85.1	3.38	142	46.2	3.74	2.88	7.61	16.32	1.37	-4.84	4.64	28.7	2	3	2	0
DMIP	Pure water	Pure methanol	20% B isocratic elution	1.1043	1.43	-0.64	1.51	-0.5	-1.46	-5.87	-0.59	0	-2.79	20.82	1	1	3	0	12	172	1.11e+21	-332645	-25.27	0.81	195.56	198.01	2.3	0.01	9.99	128	57.4	269	243	9.75	3.19	7.16	17.5	-1.15	-4.24	10.15	56.7	2	2	4	0
Sarcosine	Pure water	Pure methanol	20% B isocratic elution	-0.144705	0.05	0.22	4.28	1.12	-1.22	-3.58	1.14	0	-3.13	20.82	-2.8	2	3	2	6	52.8	1110000000000	-203238	-12.38	0.78	127.98	113.01	2.05	0	2.92	94.2	17.5	201	42.4	4.57	4.19	4.37	24.65	-2.74	-4.93	8.22	49.3	0	0	1	0
Creatinine	Pure water	Pure methanol	20% B isocratic elution	0.87014	1.27	-0.99	1.29	-0.27	-1.86	-4.21	0.18	0	-3.46	20.82	-1.8	1	1	0	8	151	111000000000000	-248681	-30.05	0.8	143.83	134.46	2.13	0	11.98	146	74.4	333	274	12.86	4.35	5.11	15.98	-5.3	-5.49	12.08	58.7	1	1	3	0
L-Carnosine	Pure water	Pure methanol	20% B isocratic elution	-0.0328991	0.27	-1.73	-0.26	-0.44	-2.84	-7.25	0.18	0	-3.77	20.82	-4	4	5	6	16	259	1.11e+29	-499765	-38.44	1.62	256.29	270.05	2.43	0	12.99	233	51	527	223	14.27	9.82	9.18	20.43	-2.61	-2.2	9.07	121	1	1	4	0
Betaine	Pure water	Pure methanol	20% B isocratic elution	0.713262	0.69	-2.23	-0.47	0.56	-2.53	-4.54	1.14	0	-4.44	20.82	0.5	0	2	1	8	87.6	1.11e+18	-252565	-41.59	0.81	153.39	154.86	2.19	0	15.35	178	181	468	789	21.46	0.08	1.63	14.25	-9.97	-2.66	15.47	40.1	0	0	1	0
Cytosine	Pure water	Pure methanol	20% B isocratic elution	0.760969	1.19	-0.75	0.33	-1.01	-2.22	-3.99	-0.01	0	-3.48	20.82	-1.7	2	2	0	8	170	1110000000000	-247927	-34.38	0.87	136.73	126.12	2.1	0	12.89	167	25.9	432	122	12.95	9.67	6.77	18.33	-4	-2.61	13.02	67.5	1	1	3	0
Hypoxanthine	Pure water	Pure methanol	20% B isocratic elution	0.0278288	0.12	-0.72	1.31	-1.14	-1.82	-4.28	-0.59	0	-3.06	20.82	-0.5	2	3	0	10	190	11100000000000	-305849	-25.27	0.97	150.2	143.93	2.16	0.01	2.51	159	5.76	351	-26.8	8.83	8.14	3.33	11.33	-6.92	-2.86	2.6	70.1	2	2	4	0
Xanthine	Pure water	Pure methanol	20% B isocratic elution	-0.539545	-0.25	-0.71	1.37	-1.16	-1.8	-4.52	-0.59	0	-2.94	20.82	-0.7	3	3	0	11	217	111000000000000	-353097	-23.72	1.25	159.89	153.96	2.19	0.01	6.06	170	-15.1	367	-128	7.64	10.2	7.74	22.93	-2.99	-2.73	6.1	86.9	2	2	4	0
Guanine	Pure water	Pure methanol	20% B isocratic elution	0.208759	0.74	-1.03	0.35	-1.53	-2.25	-4.69	-0.59	0	-3.2	20.82	-1.1	3	3	0	11	225	1110000000000000	-340610	-30.43	1.22	164.42	158.81	2.2	0.01	3.28	191	-7.34	441	-50.1	10.78	11.63	4.81	13.86	-5.99	-2.81	3.34	96.2	2	2	5	0
Adenine	Pure water	Pure methanol	20% B isocratic elution	0.88601	1.49	-0.94	0.65	-1.32	-1.93	-4.46	-0.59	0	-2.99	20.82	-0.1	2	4	0	10	127	111000000000000	-293365	-30.51	0.99	153.88	148.09	2.17	0	11.17	161	9.31	380	47.5	10.2	8.73	5.5	15	-4.52	-2.45	11.33	80.5	2	2	5	0
Beta-Thymidine	Pure water	Pure methanol	20% B isocratic elution	-1.55516	-0.74	-0.87	1.16	-0.99	-1.9	-7.06	-0.97	0	-2.72	20.82	-1.2	3	5	2	17	381	1.11e+30	-549390	-24.52	1.42	246.36	266.66	2.43	0.01	4.01	176	50.1	310	96.6	9.28	5.39	15.53	45.1	-0.93	-3.96	6.43	99.1	1	2	2	0
Cytidine	Pure water	Pure methanol	20% B isocratic elution	-0.579708	-0.13	-1.62	-2.05	-1.88	-2.8	-6.77	-0.97	0	-3.03	20.82	-2.1	4	5	2	17	383	1.11e+29	-559442	-33.42	1.74	241.37	261.47	2.42	0.01	6.86	228	40.6	467	146	13.35	9.24	15.82	45.67	-2.4	-3.46	9.4	129	1	2	3	0
Inosine	Pure water	Pure methanol	20% B isocratic elution	-1.30135	-0.77	-1.84	-1.34	-2.33	-2.88	-7.22	-1.55	0	-2.91	20.82	-1.3	4	7	2	19	405	1.11e+30	-617361	-37.38	1.8	261.27	285.84	2.46	0.01	9.42	243	21.5	459	3.18	11.36	10.23	10.31	29.87	-2.75	-2.08	9.18	129	2	3	4	0
Xanthosine	Pure water	Pure methanol	20% B isocratic elution	-1.12123	-1	-1.73	-1.92	-2.13	-2.81	-7.28	-1.55	0	-2.85	20.82	-2.4	5	7	2	20	434	1.11e+31	-664603	-37.75	1.91	265.99	291.82	2.47	0.01	15.45	240	28.5	439	14	11	9.33	12.24	32.43	-2.45	-3.34	12.18	146	2	3	4	0
Guanosine	Pure water	Pure methanol	20% B isocratic elution	-0.80451	-0.4	-2.14	-2.39	-2.69	-3.17	-7.67	-1.55	0	-2.96	20.82	-1.9	5	7	2	20	446	1.11e+32	-652123	-42.64	2.09	276.17	298.73	2.48	0.01	11.43	271	-5.63	543	-85.9	12.26	14.35	13.14	36.02	-2.86	-2.22	11.13	155	2	3	5	0
Uridine	Pure water	Pure methanol	20% B isocratic elution	-1.01022	-0.65	-1.01	-0.25	-1.04	-1.93	-6.52	-0.97	0	-2.75	20.82	-2	4	6	2	17	371	1.11e+28	-571934	-25.98	1.71	235.87	256.94	2.41	0.01	5.57	194	28.6	328	37.3	8.29	6.3	11.64	34.25	-0.98	-1.56	4.28	119	1	2	2	0
Adenosine	Pure water	Pure methanol	20% B isocratic elution	0.0474297	0.38	-0.96	0.66	-1.65	-1.83	-7.23	-1.55	0	-2.18	20.82	-1.1	4	8	2	19	335	1.11e+31	-604889	-23.66	1.73	253.58	283.19	2.45	0.01	2.18	191	36.3	322	107	8.99	5.54	14.19	39.95	-0.74	-3.53	3.84	140	2	3	5	0
D-Pantothenic acid	Pure water	Pure methanol	35% B isocratic elution	-0.93486	-1.07	-1.33	1.6	0.14	-2.19	-7.23	1.14	0	-3.34	22.92	-1.1	4	5	6	15	239	1.11e+31	-492236	-26.02	1.56	247.96	269.32	2.43	0	7.46	186	7.26	354	-39.4	8.13	8.95	6.22	23.15	-1.05	-7.18	4.69	107	0	0	1	0
Niacinamide	Pure water	Pure methanol	35% B isocratic elution	0.428683	0.63	-0.4	3.02	-0.28	-1.05	-4.62	-0.01	0	-2.76	22.92	-0.4	1	2	1	9	114	111000000000000	-261773	-16.8	0.79	152.74	146.35	2.17	0	2.95	112	27.7	215	95.8	7.01	3.68	5.08	12.91	-3.24	-5.1	4.94	56	1	1	2	0
Pyridoxal	Pure water	Pure methanol	35% B isocratic elution	0.557401	0.98	-0.36	2.47	-0.46	-1.31	-5.54	-0.01	0	-2.54	22.92	0	2	4	2	12	162	1.11e+20	-370806	-16.87	1.08	190.02	193.09	2.29	0.01	3.53	121	8.31	226	-19.7	4.94	5.51	5.04	18.08	-1.4	-2.71	3.58	70.4	1	1	1	0
Pyridoxine	Pure water	Pure methanol	35% B isocratic elution	1.11102	1.47	-0.74	1.77	-0.73	-1.58	-5.71	-0.01	0	-2.71	22.92	-0.8	3	4	2	12	142	1.11e+22	-371565	-22.39	1.06	195.11	198.18	2.3	0	9.44	137	11.5	264	32	6.46	6.06	11.25	32	0.01	-3.22	2.9	73.6	1	1	1	0
Pyridoxamine	Pure water	Pure methanol	35% B isocratic elution	0.921788	1.25	-0.67	2.14	-0.69	-1.67	-5.88	-0.01	0	-2.66	22.92	-1	3	4	2	12	143	1.11e+23	-359090	-19.85	1.23	199.15	205.79	2.31	0.01	2.37	144	49.5	321	233	9.73	4.96	8.51	18.04	-0.23	-3.37	4.35	79.4	1	1	2	0
Thiamine	Pure water	Pure methanol	35% B isocratic elution	0.655372	0.85	0	0	-0.65	-1.58	-9.14	-0.97	0	-3.32	22.92	0	2	6	4	19	269	1.11e+34	-727954	-65.42	1.49	291.55	320.17	2.51	-0.99	0	200	-71.2	335	-70.9	6.56	7.95	14.5	36.27	1.75	-2.99	10.15	104	2	2	4	1
Nicotinic acid	Pure water	Pure methanol	35% B isocratic elution	0.189394	0.03	0.04	3.56	-0.25	-1.01	-4.33	-0.01	0	-2.47	22.92	0.4	1	3	1	9	114	11100000000000	-274248	-12.08	0.77	149.15	142	2.15	0	0.88	92.9	1.16	177	-39.1	3.37	4.37	3.73	20.67	-2.73	-2.8	3.67	50.2	1	1	1	0
Alanine	Pure water	Pure methanol	35% B isocratic elution	-0.183377	-0.18	-0.11	3.79	0.84	-1.18	-3.51	1.14	0	-3.06	22.92	-3	2	3	1	6	61.8	1110000000000	-203245	-12.07	0.88	123.86	112.49	2.05	0	1.93	103	20.6	223	81.1	5.25	4.15	6.92	15.51	-0.69	-4.07	2.88	63.3	0	0	1	0
Leucine	Pure water	Pure methanol	35% B isocratic elution	0.314514	0.46	0.1	3.98	0.87	-1.04	-5.27	1.14	0	-2.81	22.92	-1.5	2	3	3	9	101	1.11e+21	-277279	-11.49	0.91	176.64	178.51	2.25	0	1.75	97.3	10	188	15.9	4.1	4.03	4.32	23.12	-1.46	-4.42	4.6	63.3	0	0	1	0
Isoleucine	Pure water	Pure methanol	35% B isocratic elution	0.314775	0.4	0.1	3.99	0.85	-1	-5.22	1.14	0	-2.77	22.92	-1.7	2	3	3	9	103	1.11e+21	-277278	-11.39	0.9	174.76	177.8	2.25	0	1.86	95.2	4.07	178	-13.2	3.66	4.06	5.29	24.73	-0.48	-4.81	8.21	63.3	0	0	1	0
Valine	Pure water	Pure methanol	35% B isocratic elution	0.175143	0.25	-0.17	3.48	1.29	-0.7	-4.64	1.14	0	-3.11	22.92	-2.3	2	3	2	8	90.4	1.11e+18	-252603	-16.64	0.58	154.87	154.22	2.19	0	7.95	86.9	30.2	126	74.6	3.87	1.16	5.48	13.49	-1.89	-5.23	8.12	63.3	0	0	1	0
Proline	Pure water	Pure methanol	35% B isocratic elution	0.325548	0.31	-0.11	3.62	-0.08	-1.08	-4.33	0.18	0	-2.64	22.92	-2.5	2	3	1	8	103	1.11e+16	-251835	-13.13	0.77	147.6	142.26	2.15	0	3.61	94.9	18	192	36.7	4.47	4	3.51	21.36	-3.35	-4.13	3.48	49.3	1	1	1	0
Phenylalanine	Pure water	Pure methanol	35% B isocratic elution	0.179875	0.22	-0.36	2.97	-0.17	-1.11	-6	-0.01	0	-2.62	22.92	-1.5	2	3	3	12	153	1.11e+22	-348280	-15.74	1.01	200.74	208.03	2.32	0	2.66	122	9.49	216	30.8	4.48	4.38	4.16	22.91	-1.94	-2.63	7.78	63.3	0	1	1	0
Methionine	Pure water	Pure methanol	35% B isocratic elution	-0.0743551	0.05	-0.34	3.26	0.72	-1.18	-5.74	1.14	0	-3.02	22.92	-1.9	2	4	4	9	97	1.11e+19	-502501	-15.83	1.08	186.45	185.96	2.27	0.01	4.25	126	19.1	229	42.1	4.86	4.41	4.94	22.93	-1.51	-3.09	4.05	88.6	0	0	1	1
Tryptophan	Pure water	Pure methanol	35% B isocratic elution	-0.221504	-0.16	-0.9	1.74	-0.89	-1.3	-7.01	-0.59	0	-2.55	22.92	-1.1	3	3	3	15	245	1.11e+26	-430876	-21.02	1.24	233.33	250.05	2.4	0	5.34	153	-10.6	271	-20.2	4.73	6.7	4.11	22.25	-1.98	-4.08	5.74	79.1	1	2	2	0
Serine	Pure water	Pure methanol	35% B isocratic elution	-0.473323	-0.7	-0.29	2.82	0.79	-1.22	-3.67	1.14	0	-3.14	22.92	-3.1	3	4	2	7	72.6	11100000000000	-250467	-14.94	1.06	132.32	122.02	2.09	0	3.06	118	4.07	216	-33.2	4.49	4.85	3.58	19.55	-4.08	-3.26	0.99	83.6	0	0	1	0
Glutamine	Pure water	Pure methanol	35% B isocratic elution	-0.492918	-0.66	-0.91	1.53	0.5	-1.88	-5.15	1.14	0	-3.65	22.92	-3.1	3	4	4	10	146	1.11e+19	-333835	-24.89	1.35	180.5	176.05	2.25	0	6.95	174	25	351	64	9.61	7.18	5.6	22.19	-3.61	-5.52	7.53	106	0	0	2	0
Threonine	Pure water	Pure methanol	35% B isocratic elution	-0.296404	-0.48	-0.25	3.49	0.71	-1.26	-4.22	1.14	0	-2.99	22.92	-2.9	3	4	2	8	93.3	1.11e+16	-275147	-14.56	1.14	149.43	144.38	2.16	0.01	4	119	6.4	228	-10.9	5.24	4.98	2.45	17.53	-4.59	-5.42	3.68	83.6	0	0	1	0
Cysteine	Pure water	Pure methanol	35% B isocratic elution	-0.729794	-0.99	-0.24	3.62	0.58	-0.94	-4.57	1.14	0	-2.83	22.92	-2.5	3	4	2	7	75.3	11100000000000	-453148	-13.45	1	147.18	141.36	2.15	0.01	3.06	108	-15.6	173	-97.6	1.79	4.69	5.27	20.11	-1.25	-3.34	5	64.3	0	0	1	1
Asparagine	Pure water	Pure methanol	35% B isocratic elution	-0.598847	-0.94	-0.79	2.07	0.56	-1.91	-4.49	1.14	0	-3.81	22.92	-3.4	3	4	3	9	134	1.11e+16	-309157	-24.85	1.33	160.84	155.26	2.19	0	3.88	177	14.7	352	34.5	9.05	7.57	3.77	19.29	-6.05	-4.96	6.4	106	0	0	2	0
Glutamicacid	Pure water	Pure methanol	35% B isocratic elution	-0.611491	-1.03	-0.75	2.12	0.97	-1.44	-4.82	1.14	0	-3.7	22.92	-3.7	3	5	4	10	145	1.11e+18	-346311	-25.1	1.06	172.73	167.41	2.22	0	8.05	150	9.3	247	-26.7	4.8	5.32	4.16	20.54	-4.48	-4.16	4.84	101	0	0	1	1
Lysine	Pure water	Pure methanol	35% B isocratic elution	-0.0119872	0.24	-0.71	2.83	1.15	-1.2	-5.71	1.14	0	-3.43	22.92	-3	3	4	5	10	106	1.11e+23	-312026	-21.17	0.86	191.1	191.01	2.28	0	5.99	127	75.3	255	325	8.64	1.15	8.95	18.74	-1	-1.73	0.96	89.3	0	0	2	0
Arginine	Pure water	Pure methanol	35% B isocratic elution	0.424495	0.81	-1.26	1.47	0.72	-1.65	-6.36	1.14	0	-3.69	22.92	-4.2	4	4	5	12	176	1.11e+25	-380778	-28.48	1.38	214.93	214.24	2.33	0	9.11	182	56.4	339	241	10.62	3.9	10.66	22.26	-2.7	-2.93	1.97	128	0	0	4	0
Histidine	Pure water	Pure methanol	35% B isocratic elution	0.241687	0.52	-0.97	1.3	0.07	-1.46	-5.27	0.18	0	-3.51	22.92	-3.2	3	4	3	11	151	1.11e+19	-344509	-27.47	0.98	180.91	181.77	2.26	0	5.04	160	36.7	296	139	8.38	4.38	5.7	14.6	-3.9	-4.52	8.26	92	1	1	3	0
Citrulline	Pure water	Pure methanol	35% B isocratic elution	-0.615567	-0.78	-1.3	1.3	0.38	-2.27	-6.2	1.14	0	-3.9	22.92	-4.3	4	4	5	12	171	1.11e+24	-393268	-29.64	1.53	214.73	215.15	2.33	0	7.6	204	40.5	433	151	12.42	8.36	5.05	24.14	-4.38	-3.03	2.31	118	0	0	3	0
Taurine	Pure water	Pure methanol	35% B isocratic elution	-0.997714	-1.39	-0.56	3.08	0.82	-1.43	-3.93	1.14	0	-3.45	22.92	-4.1	2	4	2	7	120	11100000000000	-476406	-18.56	1.09	143.51	133.49	2.13	0.01	3.57	138	-7.89	285	-71.8	4.16	6.16	-2.47	10.55	-10.36	-3.86	3.47	88.8	0	0	1	1
Tyrosine	Pure water	Pure methanol	35% B isocratic elution	0.346306	0.58	-0.91	2.22	-0.56	-1.7	-6.11	-0.01	0	-2.9	22.92	-2.3	3	4	3	13	176	1.11e+23	-395507	-20.45	1.27	210.41	219.03	2.34	0	4.34	158	-11.2	301	-58.2	5.35	7.81	4.18	23.28	-2.58	-2.6	8.84	83.6	0	1	1	0
Hypotaurine	Pure water	Pure methanol	35% B isocratic elution	-0.738343	-1.16	-0.48	3.16	0.61	-1.46	-4.05	1.14	0	-3.39	22.92	-1.5	2	4	2	6	55.5	1110000000000	-429187	-19.14	0.95	136.46	125.99	2.1	0	5.56	129	43.8	272	164	8.05	3.84	8.34	19	-1.9	-2.55	5.19	82.5	0	0	1	1
L-Hydroxyproline	Pure water	Pure methanol	35% B isocratic elution	-0.222978	-0.48	-0.6	2.82	-0.35	-1.71	-4.41	0.18	0	-3.04	22.92	-3.3	3	4	1	9	125	1.11e+17	-299059	-18.75	1.12	155.95	154.27	2.19	0	3.05	140	34.4	301	118	8.1	5.75	7.9	18.5	-1.19	-2.19	3.72	69.6	1	1	1	0
N-omiga-acetylhistamine	Pure water	Pure methanol	35% B isocratic elution	1.20048	1.54	-1.01	2.28	-0.1	-1.57	-5.96	0.18	0	-3.33	22.92	-0.4	2	2	3	11	138	1.11e+21	-321960	-23.57	0.83	195.51	194.44	2.29	0	4.66	148	58.4	320	214	11.2	4.88	6.06	14.64	-2.8	-2.61	4.77	57.8	1	1	3	0
L-pyroglutamic acid	Pure water	Pure methanol	35% B isocratic elution	-0.693453	-0.96	-0.59	2.43	-0.14	-1.5	-4.27	0.18	0	-3.19	22.92	-0.8	2	3	1	9	154	1110000000000000	-298326	-20.95	0.96	151.34	146.44	2.17	0	7.17	137	11.3	267	-26.3	6.36	6.48	3.66	21.17	-4.87	-2.3	6.22	66.4	1	1	1	0
Tyramine	Pure water	Pure methanol	35% B isocratic elution	0.366301	0.73	-0.19	3.22	-0.29	-1.11	-5.62	-0.01	0	-2.58	22.92	1.1	2	2	2	10	87.3	1.11e+20	-277120	-13.98	0.82	183.62	181.83	2.26	0	2.6	106	27.2	227	168	5.88	3.52	8.82	18.57	0.95	-2.63	3.17	46.2	0	1	1	0
Histamine	Pure water	Pure methanol	35% B isocratic elution	0.321067	-0.14	-0.65	2.94	-0.08	-1.33	-4.73	0.18	0	-3.04	22.92	-0.7	2	2	2	8	64.7	1.11e+16	-226118	-18.32	0.8	155.19	146.49	2.17	0	4.89	122	68.6	307	360	10.5	2.98	8.7	18.47	-1.26	-2.85	4.92	54.7	1	1	3	0
AaC	Pure water	Pure methanol	35% B isocratic elution	0.928516	1.31	-0.33	2.2	-1.53	-0.63	-6.6	-1.36	0.01	-1.83	22.92	2.6	2	2	0	14	219	1.11e+22	-369670	-14.85	0.86	210.7	216.51	2.34	0	2.51	108	-19	154	-31.5	2.67	3.95	5.78	12.59	0.02	-2.83	2.59	54.7	2	3	3	0
IQx	Pure water	Pure methanol	35% B isocratic elution	1.02718	1.48	-0.91	0.96	-1.56	-1.3	-6.65	-1.36	0	-2.32	22.92	0.6	1	4	0	15	246	1.11e+23	-414479	-25.04	0.93	218.25	227.81	2.36	0.01	8.8	141	56.1	274	235	9.64	3.08	5.71	14.84	-2.23	-2.75	8.88	69.6	2	3	5	0
8-MeIQx	Pure water	Pure methanol	35% B isocratic elution	0.993724	1.31	-0.95	0.92	-1.58	-1.32	-7.28	-1.36	0	-2.26	22.92	1	1	4	0	16	271	1.11e+26	-439162	-25.13	0.98	237.6	249.06	2.4	0.01	7.72	142	63.8	281	265	10.06	2.97	5.88	15.22	-1.59	-1.95	7.78	69.6	2	3	5	0
MeIQ	Pure water	Pure methanol	35% B isocratic elution	1.08672	1.31	-0.62	1.35	-1.6	-0.97	-7.37	-1.36	0.01	-1.92	22.92	2	1	3	0	16	270	1.11e+27	-429091	-21.18	0.93	236.91	253.92	2.4	0	9.17	124	38.5	216	166	7.22	2.74	7.22	16.13	0.27	-4.33	9.28	56.7	2	3	4	0
IQ[4,5-b]	Pure water	Pure methanol	35% B isocratic elution	1.00678	1.2	-0.96	0.7	-1.61	-1.26	-6.9	-1.36	0	-2.36	22.92	1.7	1	3	0	15	245	1.11e+24	-404413	-27.45	0.9	223.43	232.81	2.37	0	10.84	139	39.2	269	182	8.87	4.02	6.83	16.69	-0.82	-4.58	11	56.7	2	3	4	0
Harman	Pure water	Pure methanol	35% B isocratic elution	1.16843	1.47	0.16	2.69	-1.42	-0.54	-6.79	-1.36	0.01	-1.69	22.92	3.6	1	1	0	14	216	1.11e+23	-359587	-12.73	0.59	214.44	223.28	2.35	0	4.55	81.6	10	132	63.3	3.7	2.33	7.72	16.34	1.94	-4.95	4.58	28.7	2	3	2	0
IQ	Pure water	Pure methanol	35% B isocratic elution	1.17444	1.47	-0.59	1.43	-1.61	-0.95	-6.89	-1.36	0	-1.98	22.92	1.5	1	3	0	15	245	1.11e+24	-404413	-20.86	0.92	222.22	233.02	2.37	0	8.83	123	32.7	213	148	6.9	2.78	7	15.75	-0.15	-2.69	8.95	56.7	2	3	4	0
Norharman	Pure water	Pure methanol	35% B isocratic elution	1.14221	1.45	-0.02	2.73	-1.43	-0.61	-6.2	-1.36	0.01	-1.83	22.92	3.2	1	1	0	13	193	1.11e+20	-334905	-13.23	0.56	196.55	201.82	2.3	0	4.61	85.1	3.38	142	46.2	3.74	2.88	7.61	16.32	1.37	-4.84	4.64	28.7	2	3	2	0
DMIP	Pure water	Pure methanol	35% B isocratic elution	1.17647	1.58	-0.86	1.51	-0.78	-1.32	-5.98	-0.59	0	-2.72	22.92	1	1	3	0	12	172	1.11e+21	-332645	-25.27	0.81	195.56	198.01	2.3	0.01	9.99	128	57.4	269	243	9.75	3.19	7.16	17.5	-1.15	-4.24	10.15	56.7	2	2	4	0
Phe-p-1	Pure water	Pure methanol	35% B isocratic elution	1.18104	1.53	0.07	2.74	-1.21	-0.53	-6.6	-1.16	0.01	-1.81	22.92	2.3	1	2	1	13	152	1.11e+22	-335660	-12.87	0.73	209.56	213.73	2.33	0	3.22	91.3	4.88	123	51	3.16	1.78	7	14.9	1.32	-6	3.7	38.9	1	2	2	0
7,8-DiMeIQx	Pure water	Pure methanol	35% B isocratic elution	1.06818	1.35	-0.97	0.84	-1.6	-1.34	-7.84	-1.36	0	-2.19	22.92	1.4	1	4	0	17	297	1.11e+29	-463843	-25.35	1.03	254.55	269.67	2.43	0.01	6.62	143	68.9	284	281	10.44	2.87	6.01	15.48	-1.09	-4.51	6.74	69.6	2	3	5	0
Sarcosine	Pure water	Pure methanol	35% B isocratic elution	-0.187298	-0.19	-0.03	4.28	0.89	-1.11	-3.67	1.14	0	-3.05	22.92	-2.8	2	3	2	6	52.8	1110000000000	-203238	-12.38	0.78	127.98	113.01	2.05	0	2.92	94.2	17.5	201	42.4	4.57	4.19	4.37	24.65	-2.74	-4.93	8.22	49.3	0	0	1	0
Creatinine	Pure water	Pure methanol	35% B isocratic elution	0.865779	1.1	-0.87	1.29	-0.16	-1.68	-4.28	0.18	0	-3.54	22.92	-1.8	1	1	0	8	151	111000000000000	-248681	-30.05	0.8	143.83	134.46	2.13	0	11.98	146	74.4	333	274	12.86	4.35	5.11	15.98	-5.3	-5.49	12.08	58.7	1	1	3	0
L-Carnosine	Pure water	Pure methanol	35% B isocratic elution	-0.0169617	0.28	-1.78	-0.26	-0.57	-2.58	-7.41	0.18	0	-3.78	22.92	-4	4	5	6	16	259	1.11e+29	-499765	-38.44	1.62	256.29	270.05	2.43	0	12.99	233	51	527	223	14.27	9.82	9.18	20.43	-2.61	-2.2	9.07	121	1	1	4	0
Betaine	Pure water	Pure methanol	35% B isocratic elution	0.702545	0.65	-1.92	-0.47	0.83	-2.32	-4.61	1.14	0	-4.61	22.92	0.5	0	2	1	8	87.6	1.11e+18	-252565	-41.59	0.81	153.39	154.86	2.19	0	15.35	178	181	468	789	21.46	0.08	1.63	14.25	-9.97	-2.66	15.47	40.1	0	0	1	0
Cytosine	Pure water	Pure methanol	35% B isocratic elution	0.715719	1.06	-0.54	0.33	-0.84	-2.03	-4.06	-0.01	0	-3.6	22.92	-1.7	2	2	0	8	170	1110000000000	-247927	-34.38	0.87	136.73	126.12	2.1	0	12.89	167	25.9	432	122	12.95	9.67	6.77	18.33	-4	-2.61	13.02	67.5	1	1	3	0
Hypoxanthine	Pure water	Pure methanol	35% B isocratic elution	0.0130445	-0.04	-0.62	1.31	-1.07	-1.64	-4.37	-0.59	0	-3.14	22.92	-0.5	2	3	0	10	190	11100000000000	-305849	-25.27	0.97	150.2	143.93	2.16	0.01	2.51	159	5.76	351	-26.8	8.83	8.14	3.33	11.33	-6.92	-2.86	2.6	70.1	2	2	4	0
Xanthine	Pure water	Pure methanol	35% B isocratic elution	-0.555517	-0.71	-0.68	1.37	-1.15	-1.62	-4.62	-0.59	0	-2.99	22.92	-0.7	3	3	0	11	217	111000000000000	-353097	-23.72	1.25	159.89	153.96	2.19	0.01	6.06	170	-15.1	367	-128	7.64	10.2	7.74	22.93	-2.99	-2.73	6.1	86.9	2	2	4	0
Guanine	Pure water	Pure methanol	35% B isocratic elution	0.192756	0.23	-0.86	0.35	-1.41	-2.04	-4.78	-0.59	0	-3.31	22.92	-1.1	3	3	0	11	225	1110000000000000	-340610	-30.43	1.22	164.42	158.81	2.2	0.01	3.28	191	-7.34	441	-50.1	10.78	11.63	4.81	13.86	-5.99	-2.81	3.34	96.2	2	2	5	0
Adenine	Pure water	Pure methanol	35% B isocratic elution	0.868909	1.45	-0.85	0.65	-1.27	-1.75	-4.54	-0.59	0	-3.06	22.92	-0.1	2	4	0	10	127	111000000000000	-293365	-30.51	0.99	153.88	148.09	2.17	0	11.17	161	9.31	380	47.5	10.2	8.73	5.5	15	-4.52	-2.45	11.33	80.5	2	2	5	0
Beta-Thymidine	Pure water	Pure methanol	35% B isocratic elution	-1.58919	-1.13	-1.19	1.16	-1.37	-1.69	-7.22	-0.97	0	-2.62	22.92	-1.2	3	5	2	17	381	1.11e+30	-549390	-24.52	1.42	246.36	266.66	2.43	0.01	4.01	176	50.1	310	96.6	9.28	5.39	15.53	45.1	-0.93	-3.96	6.43	99.1	1	2	2	0
Cytidine	Pure water	Pure methanol	35% B isocratic elution	-0.589587	-0.35	-1.69	-2.05	-2.02	-2.54	-6.93	-0.97	0	-3.04	22.92	-2.1	4	5	2	17	383	1.11e+29	-559442	-33.42	1.74	241.37	261.47	2.42	0.01	6.86	228	40.6	467	146	13.35	9.24	15.82	45.67	-2.4	-3.46	9.4	129	1	2	3	0
Inosine	Pure water	Pure methanol	35% B isocratic elution	-1.33211	-1.51	-1.89	-1.34	-2.48	-2.6	-7.41	-1.55	0	-2.92	22.92	-1.3	4	7	2	19	405	1.11e+30	-617361	-37.38	1.8	261.27	285.84	2.46	0.01	9.42	243	21.5	459	3.18	11.36	10.23	10.31	29.87	-2.75	-2.08	9.18	129	2	3	4	0
Xanthosine	Pure water	Pure methanol	35% B isocratic elution	-1.11045	-0.91	-1.84	-1.92	-2.32	-2.54	-7.47	-1.55	0	-2.84	22.92	-2.4	5	7	2	20	434	1.11e+31	-664603	-37.75	1.91	265.99	291.82	2.47	0.01	15.45	240	28.5	439	14	11	9.33	12.24	32.43	-2.45	-3.34	12.18	146	2	3	4	0
Guanosine	Pure water	Pure methanol	35% B isocratic elution	-0.835267	-1.06	-2.17	-2.39	-2.83	-2.87	-7.85	-1.55	0	-2.98	22.92	-1.9	5	7	2	20	446	1.11e+32	-652123	-42.64	2.09	276.17	298.73	2.48	0.01	11.43	271	-5.63	543	-85.9	12.26	14.35	13.14	36.02	-2.86	-2.22	11.13	155	2	3	5	0
Uridine	Pure water	Pure methanol	35% B isocratic elution	-0.951732	-0.58	-1.27	-0.25	-1.36	-1.72	-6.7	-0.97	0	-2.67	22.92	-2	4	6	2	17	371	1.11e+28	-571934	-25.98	1.71	235.87	256.94	2.41	0.01	5.57	194	28.6	328	37.3	8.29	6.3	11.64	34.25	-0.98	-1.56	4.28	119	1	2	2	0
Adenosine	Pure water	Pure methanol	35% B isocratic elution	0.0165015	0.44	-1.3	0.66	-2.08	-1.62	-7.39	-1.55	0	-2.06	22.92	-1.1	4	8	2	19	335	1.11e+31	-604889	-23.66	1.73	253.58	283.19	2.45	0.01	2.18	191	36.3	322	107	8.99	5.54	14.19	39.95	-0.74	-3.53	3.84	140	2	3	5	0
D-Pantothenic acid	Pure water	Pure methanol	50% B isocratic elution	-0.953512	-1.1	-1.45	1.6	-0.1	-2.01	-7.34	1.14	0	-3.32	25.03	-1.1	4	5	6	15	239	1.11e+31	-492236	-26.02	1.56	247.96	269.32	2.43	0	7.46	186	7.26	354	-39.4	8.13	8.95	6.22	23.15	-1.05	-7.18	4.69	107	0	0	1	0
Niacinamide	Pure water	Pure methanol	50% B isocratic elution	0.437454	0.64	-0.44	3.02	-0.38	-0.95	-4.69	-0.01	0	-2.77	25.03	-0.4	1	2	1	9	114	111000000000000	-261773	-16.8	0.79	152.74	146.35	2.17	0	2.95	112	27.7	215	95.8	7.01	3.68	5.08	12.91	-3.24	-5.1	4.94	56	1	1	2	0
Pyridoxal	Pure water	Pure methanol	50% B isocratic elution	0.565086	1.05	-0.54	2.47	-0.74	-1.21	-5.64	-0.01	0	-2.48	25.03	0	2	4	2	12	162	1.11e+20	-370806	-16.87	1.08	190.02	193.09	2.29	0.01	3.53	121	8.31	226	-19.7	4.94	5.51	5.04	18.08	-1.4	-2.71	3.58	70.4	1	1	1	0
Pyridoxine	Pure water	Pure methanol	50% B isocratic elution	1.14817	1.6	-0.86	1.77	-0.95	-1.46	-5.8	-0.01	0	-2.69	25.03	-0.8	3	4	2	12	142	1.11e+22	-371565	-22.39	1.06	195.11	198.18	2.3	0	9.44	137	11.5	264	32	6.46	6.06	11.25	32	0.01	-3.22	2.9	73.6	1	1	1	0
Pyridoxamine	Pure water	Pure methanol	50% B isocratic elution	0.98805	1.4	-0.79	2.14	-0.9	-1.53	-5.97	-0.01	0	-2.64	25.03	-1	3	4	2	12	143	1.11e+23	-359090	-19.85	1.23	199.15	205.79	2.31	0.01	2.37	144	49.5	321	233	9.73	4.96	8.51	18.04	-0.23	-3.37	4.35	79.4	1	1	2	0
Thiamine	Pure water	Pure methanol	50% B isocratic elution	0.698707	1.06	0	0	-0.92	-1.45	-9.26	-0.97	0	-3.26	25.03	0	2	6	4	19	269	1.11e+34	-727954	-65.42	1.49	291.55	320.17	2.51	-0.99	0	200	-71.2	335	-70.9	6.56	7.95	14.5	36.27	1.75	-2.99	10.15	104	2	2	4	1
Nicotinic acid	Pure water	Pure methanol	50% B isocratic elution	0.132416	-0.04	-0.13	3.56	-0.49	-0.93	-4.41	-0.01	0	-2.42	25.03	0.4	1	3	1	9	114	11100000000000	-274248	-12.08	0.77	149.15	142	2.15	0	0.88	92.9	1.16	177	-39.1	3.37	4.37	3.73	20.67	-2.73	-2.8	3.67	50.2	1	1	1	0
Alanine	Pure water	Pure methanol	50% B isocratic elution	-0.200555	-0.23	-0.21	3.79	0.72	-1.09	-3.57	1.14	0	-3.05	25.03	-3	2	3	1	6	61.8	1110000000000	-203245	-12.07	0.88	123.86	112.49	2.05	0	1.93	103	20.6	223	81.1	5.25	4.15	6.92	15.51	-0.69	-4.07	2.88	63.3	0	0	1	0
Leucine	Pure water	Pure methanol	50% B isocratic elution	0.29568	0.34	-0.15	3.98	0.54	-0.95	-5.35	1.14	0	-2.73	25.03	-1.5	2	3	3	9	101	1.11e+21	-277279	-11.49	0.91	176.64	178.51	2.25	0	1.75	97.3	10	188	15.9	4.1	4.03	4.32	23.12	-1.46	-4.42	4.6	63.3	0	0	1	0
Isoleucine	Pure water	Pure methanol	50% B isocratic elution	0.29865	0.39	-0.15	3.99	0.52	-0.92	-5.29	1.14	0	-2.69	25.03	-1.7	2	3	3	9	103	1.11e+21	-277278	-11.39	0.9	174.76	177.8	2.25	0	1.86	95.2	4.07	178	-13.2	3.66	4.06	5.29	24.73	-0.48	-4.81	8.21	63.3	0	0	1	0
Valine	Pure water	Pure methanol	50% B isocratic elution	0.166836	0.23	-0.3	3.48	1.11	-0.62	-4.7	1.14	0	-3.08	25.03	-2.3	2	3	2	8	90.4	1.11e+18	-252603	-16.64	0.58	154.87	154.22	2.19	0	7.95	86.9	30.2	126	74.6	3.87	1.16	5.48	13.49	-1.89	-5.23	8.12	63.3	0	0	1	0
Proline	Pure water	Pure methanol	50% B isocratic elution	0.316363	0.35	-0.25	3.62	-0.27	-0.99	-4.39	0.18	0	-2.61	25.03	-2.5	2	3	1	8	103	1.11e+16	-251835	-13.13	0.77	147.6	142.26	2.15	0	3.61	94.9	18	192	36.7	4.47	4	3.51	21.36	-3.35	-4.13	3.48	49.3	1	1	1	0
Phenylalanine	Pure water	Pure methanol	50% B isocratic elution	0.165758	0.24	-0.56	2.97	-0.48	-1.03	-6.1	-0.01	0	-2.56	25.03	-1.5	2	3	3	12	153	1.11e+22	-348280	-15.74	1.01	200.74	208.03	2.32	0	2.66	122	9.49	216	30.8	4.48	4.38	4.16	22.91	-1.94	-2.63	7.78	63.3	0	1	1	0
Methionine	Pure water	Pure methanol	50% B isocratic elution	-0.108931	-0.07	-0.51	3.26	0.45	-1.09	-5.83	1.14	0	-2.97	25.03	-1.9	2	4	4	9	97	1.11e+19	-502501	-15.83	1.08	186.45	185.96	2.27	0.01	4.25	126	19.1	229	42.1	4.86	4.41	4.94	22.93	-1.51	-3.09	4.05	88.6	0	0	1	1
Tryptophan	Pure water	Pure methanol	50% B isocratic elution	-0.23587	-0.17	-1.07	1.74	-1.22	-1.21	-7.11	-0.59	0	-2.5	25.03	-1.1	3	3	3	15	245	1.11e+26	-430876	-21.02	1.24	233.33	250.05	2.4	0	5.34	153	-10.6	271	-20.2	4.73	6.7	4.11	22.25	-1.98	-4.08	5.74	79.1	1	2	2	0
Serine	Pure water	Pure methanol	50% B isocratic elution	-0.499739	-0.74	-0.36	2.82	0.69	-1.13	-3.73	1.14	0	-3.14	25.03	-3.1	3	4	2	7	72.6	11100000000000	-250467	-14.94	1.06	132.32	122.02	2.09	0	3.06	118	4.07	216	-33.2	4.49	4.85	3.58	19.55	-4.08	-3.26	0.99	83.6	0	0	1	0
Glutamine	Pure water	Pure methanol	50% B isocratic elution	-0.501264	-0.68	-0.86	1.53	0.48	-1.72	-5.23	1.14	0	-3.7	25.03	-3.1	3	4	4	10	146	1.11e+19	-333835	-24.89	1.35	180.5	176.05	2.25	0	6.95	174	25	351	64	9.61	7.18	5.6	22.19	-3.61	-5.52	7.53	106	0	0	2	0
Threonine	Pure water	Pure methanol	50% B isocratic elution	-0.301001	-0.48	-0.38	3.49	0.53	-1.16	-4.3	1.14	0	-2.96	25.03	-2.9	3	4	2	8	93.3	1.11e+16	-275147	-14.56	1.14	149.43	144.38	2.16	0.01	4	119	6.4	228	-10.9	5.24	4.98	2.45	17.53	-4.59	-5.42	3.68	83.6	0	0	1	0
Cysteine	Pure water	Pure methanol	50% B isocratic elution	-0.764872	-1.01	-0.38	3.62	0.37	-0.87	-4.65	1.14	0	-2.79	25.03	-2.5	3	4	2	7	75.3	11100000000000	-453148	-13.45	1	147.18	141.36	2.15	0.01	3.06	108	-15.6	173	-97.6	1.79	4.69	5.27	20.11	-1.25	-3.34	5	64.3	0	0	1	1
Asparagine	Pure water	Pure methanol	50% B isocratic elution	-0.615774	-0.98	-0.67	2.07	0.63	-1.75	-4.56	1.14	0	-3.89	25.03	-3.4	3	4	3	9	134	1.11e+16	-309157	-24.85	1.33	160.84	155.26	2.19	0	3.88	177	14.7	352	34.5	9.05	7.57	3.77	19.29	-6.05	-4.96	6.4	106	0	0	2	0
Glutamicacid	Pure water	Pure methanol	50% B isocratic elution	-0.645664	-1.19	-0.73	2.12	0.93	-1.32	-4.9	1.14	0	-3.73	25.03	-3.7	3	5	4	10	145	1.11e+18	-346311	-25.1	1.06	172.73	167.41	2.22	0	8.05	150	9.3	247	-26.7	4.8	5.32	4.16	20.54	-4.48	-4.16	4.84	101	0	0	1	1
Lysine	Pure water	Pure methanol	50% B isocratic elution	-0.00655848	0.3	-0.79	2.83	1	-1.09	-5.78	1.14	0	-3.43	25.03	-3	3	4	5	10	106	1.11e+23	-312026	-21.17	0.86	191.1	191.01	2.28	0	5.99	127	75.3	255	325	8.64	1.15	8.95	18.74	-1	-1.73	0.96	89.3	0	0	2	0
Arginine	Pure water	Pure methanol	50% B isocratic elution	0.432067	0.85	-1.22	1.47	0.68	-1.48	-6.43	1.14	0	-3.73	25.03	-4.2	4	4	5	12	176	1.11e+25	-380778	-28.48	1.38	214.93	214.24	2.33	0	9.11	182	56.4	339	241	10.62	3.9	10.66	22.26	-2.7	-2.93	1.97	128	0	0	4	0
Histidine	Pure water	Pure methanol	50% B isocratic elution	0.231932	0.54	-0.87	1.3	0.08	-1.32	-5.34	0.18	0	-3.58	25.03	-3.2	3	4	3	11	151	1.11e+19	-344509	-27.47	0.98	180.91	181.77	2.26	0	5.04	160	36.7	296	139	8.38	4.38	5.7	14.6	-3.9	-4.52	8.26	92	1	1	3	0
Citrulline	Pure water	Pure methanol	50% B isocratic elution	-0.634207	-0.83	-1.23	1.3	0.37	-2.08	-6.28	1.14	0	-3.96	25.03	-4.3	4	4	5	12	171	1.11e+24	-393268	-29.64	1.53	214.73	215.15	2.33	0	7.6	204	40.5	433	151	12.42	8.36	5.05	24.14	-4.38	-3.03	2.31	118	0	0	3	0
Taurine	Pure water	Pure methanol	50% B isocratic elution	-0.983439	-1.17	-0.56	3.08	0.76	-1.33	-4.01	1.14	0	-3.48	25.03	-4.1	2	4	2	7	120	11100000000000	-476406	-18.56	1.09	143.51	133.49	2.13	0.01	3.57	138	-7.89	285	-71.8	4.16	6.16	-2.47	10.55	-10.36	-3.86	3.47	88.8	0	0	1	1
Tyrosine	Pure water	Pure methanol	50% B isocratic elution	0.36636	0.77	-1.02	2.22	-0.79	-1.58	-6.22	-0.01	0	-2.88	25.03	-2.3	3	4	3	13	176	1.11e+23	-395507	-20.45	1.27	210.41	219.03	2.34	0	4.34	158	-11.2	301	-58.2	5.35	7.81	4.18	23.28	-2.58	-2.6	8.84	83.6	0	1	1	0
Hypotaurine	Pure water	Pure methanol	50% B isocratic elution	-0.732841	-1	-0.46	3.16	0.62	-1.33	-4.11	1.14	0	-3.43	25.03	-1.5	2	4	2	6	55.5	1110000000000	-429187	-19.14	0.95	136.46	125.99	2.1	0	5.56	129	43.8	272	164	8.05	3.84	8.34	19	-1.9	-2.55	5.19	82.5	0	0	1	1
L-Hydroxyproline	Pure water	Pure methanol	50% B isocratic elution	-0.227388	-0.42	-0.61	2.82	-0.41	-1.57	-4.49	0.18	0	-3.06	25.03	-3.3	3	4	1	9	125	1.11e+17	-299059	-18.75	1.12	155.95	154.27	2.19	0	3.05	140	34.4	301	118	8.1	5.75	7.9	18.5	-1.19	-2.19	3.72	69.6	1	1	1	0
N-omiga-acetylhistamine	Pure water	Pure methanol	50% B isocratic elution	1.24848	1.68	-0.99	2.28	-0.18	-1.43	-6.03	0.18	0	-3.36	25.03	-0.4	2	2	3	11	138	1.11e+21	-321960	-23.57	0.83	195.51	194.44	2.29	0	4.66	148	58.4	320	214	11.2	4.88	6.06	14.64	-2.8	-2.61	4.77	57.8	1	1	3	0
L-pyroglutamic acid	Pure water	Pure methanol	50% B isocratic elution	-0.714372	-0.91	-0.57	2.43	-0.17	-1.38	-4.35	0.18	0	-3.23	25.03	-0.8	2	3	1	9	154	1110000000000000	-298326	-20.95	0.96	151.34	146.44	2.17	0	7.17	137	11.3	267	-26.3	6.36	6.48	3.66	21.17	-4.87	-2.3	6.22	66.4	1	1	1	0
Tyramine	Pure water	Pure methanol	50% B isocratic elution	0.428768	0.94	-0.39	3.22	-0.59	-1.03	-5.7	-0.01	0	-2.52	25.03	1.1	2	2	2	10	87.3	1.11e+20	-277120	-13.98	0.82	183.62	181.83	2.26	0	2.6	106	27.2	227	168	5.88	3.52	8.82	18.57	0.95	-2.63	3.17	46.2	0	1	1	0
Histamine	Pure water	Pure methanol	50% B isocratic elution	0.354896	0.05	-0.67	2.94	-0.16	-1.22	-4.78	0.18	0	-3.06	25.03	-0.7	2	2	2	8	64.7	1.11e+16	-226118	-18.32	0.8	155.19	146.49	2.17	0	4.89	122	68.6	307	360	10.5	2.98	8.7	18.47	-1.26	-2.85	4.92	54.7	1	1	3	0
AaC	Pure water	Pure methanol	50% B isocratic elution	0.976996	1.35	-0.56	2.2	-1.91	-0.57	-6.68	-1.36	0.01	-1.76	25.03	2.6	2	2	0	14	219	1.11e+22	-369670	-14.85	0.86	210.7	216.51	2.34	0	2.51	108	-19	154	-31.5	2.67	3.95	5.78	12.59	0.02	-2.83	2.59	54.7	2	3	3	0
IQx	Pure water	Pure methanol	50% B isocratic elution	1.08897	1.67	-0.99	0.96	-1.78	-1.17	-6.74	-1.36	0	-2.32	25.03	0.6	1	4	0	15	246	1.11e+23	-414479	-25.04	0.93	218.25	227.81	2.36	0.01	8.8	141	56.1	274	235	9.64	3.08	5.71	14.84	-2.23	-2.75	8.88	69.6	2	3	5	0
8-MeIQx	Pure water	Pure methanol	50% B isocratic elution	1.07811	1.59	-1.08	0.92	-1.86	-1.2	-7.38	-1.36	0	-2.24	25.03	1	1	4	0	16	271	1.11e+26	-439162	-25.13	0.98	237.6	249.06	2.4	0.01	7.72	142	63.8	281	265	10.06	2.97	5.88	15.22	-1.59	-1.95	7.78	69.6	2	3	5	0
MeIQ	Pure water	Pure methanol	50% B isocratic elution	1.18548	1.61	-0.83	1.35	-1.97	-0.87	-7.46	-1.36	0.01	-1.86	25.03	2	1	3	0	16	270	1.11e+27	-429091	-21.18	0.93	236.91	253.92	2.4	0	9.17	124	38.5	216	166	7.22	2.74	7.22	16.13	0.27	-4.33	9.28	56.7	2	3	4	0
IQ[4,5-b]	Pure water	Pure methanol	50% B isocratic elution	1.07318	1.47	-1.05	0.7	-1.85	-1.14	-6.99	-1.36	0	-2.35	25.03	1.7	1	3	0	15	245	1.11e+24	-404413	-27.45	0.9	223.43	232.81	2.37	0	10.84	139	39.2	269	182	8.87	4.02	6.83	16.69	-0.82	-4.58	11	56.7	2	3	4	0
Harman	Pure water	Pure methanol	50% B isocratic elution	1.28134	1.64	-0.15	2.69	-1.88	-0.49	-6.88	-1.36	0.01	-1.58	25.03	3.6	1	1	0	14	216	1.11e+23	-359587	-12.73	0.59	214.44	223.28	2.35	0	4.55	81.6	10	132	63.3	3.7	2.33	7.72	16.34	1.94	-4.95	4.58	28.7	2	3	2	0
IQ	Pure water	Pure methanol	50% B isocratic elution	1.27139	1.64	-0.77	1.43	-1.93	-0.85	-6.98	-1.36	0	-1.93	25.03	1.5	1	3	0	15	245	1.11e+24	-404413	-20.86	0.92	222.22	233.02	2.37	0	8.83	123	32.7	213	148	6.9	2.78	7	15.75	-0.15	-2.69	8.95	56.7	2	3	4	0
Norharman	Pure water	Pure methanol	50% B isocratic elution	1.21952	1.6	-0.27	2.73	-1.82	-0.56	-6.28	-1.36	0.01	-1.76	25.03	3.2	1	1	0	13	193	1.11e+20	-334905	-13.23	0.56	196.55	201.82	2.3	0	4.61	85.1	3.38	142	46.2	3.74	2.88	7.61	16.32	1.37	-4.84	4.64	28.7	2	3	2	0
DMIP	Pure water	Pure methanol	50% B isocratic elution	1.2641	1.77	-0.92	1.51	-0.95	-1.2	-6.06	-0.59	0	-2.73	25.03	1	1	3	0	12	172	1.11e+21	-332645	-25.27	0.81	195.56	198.01	2.3	0.01	9.99	128	57.4	269	243	9.75	3.19	7.16	17.5	-1.15	-4.24	10.15	56.7	2	2	4	0
Phe-p-1	Pure water	Pure methanol	50% B isocratic elution	1.30163	1.66	-0.22	2.74	-1.64	-0.47	-6.68	-1.16	0.01	-1.71	25.03	2.3	1	2	1	13	152	1.11e+22	-335660	-12.87	0.73	209.56	213.73	2.33	0	3.22	91.3	4.88	123	51	3.16	1.78	7	14.9	1.32	-6	3.7	38.9	1	2	2	0
7,8-DiMeIQx	Pure water	Pure methanol	50% B isocratic elution	1.1479	1.6	-1.14	0.84	-1.95	-1.21	-7.94	-1.36	0	-2.15	25.03	1.4	1	4	0	17	297	1.11e+29	-463843	-25.35	1.03	254.55	269.67	2.43	0.01	6.62	143	68.9	284	281	10.44	2.87	6.01	15.48	-1.09	-4.51	6.74	69.6	2	3	5	0
Sarcosine	Pure water	Pure methanol	50% B isocratic elution	-0.204949	-0.23	-0.15	4.28	0.75	-1.02	-3.74	1.14	0	-3.03	25.03	-2.8	2	3	2	6	52.8	1110000000000	-203238	-12.38	0.78	127.98	113.01	2.05	0	2.92	94.2	17.5	201	42.4	4.57	4.19	4.37	24.65	-2.74	-4.93	8.22	49.3	0	0	1	0
Creatinine	Pure water	Pure methanol	50% B isocratic elution	0.856075	1.15	-0.7	1.29	-0.03	-1.53	-4.33	0.18	0	-3.65	25.03	-1.8	1	1	0	8	151	111000000000000	-248681	-30.05	0.8	143.83	134.46	2.13	0	11.98	146	74.4	333	274	12.86	4.35	5.11	15.98	-5.3	-5.49	12.08	58.7	1	1	3	0
L-dihydroorotic acid	Pure water	Pure methanol	50% B isocratic elution	-1.74915	-1.1	-0.73	1.72	-0.45	-1.6	-4.65	-0.01	0	-3.31	25.03	-1.5	3	4	1	11	225	1.11e+16	-379565	-23.86	1.38	167.39	163.4	2.21	0.01	5.18	172	-17.2	327	-144	5.51	8.7	2.35	17.25	-6.68	-4.92	4.87	95.5	1	1	2	0
L-Carnosine	Pure water	Pure methanol	50% B isocratic elution	-0.00325718	0.34	-1.67	-0.26	-0.6	-2.37	-7.53	0.18	0	-3.86	25.03	-4	4	5	6	16	259	1.11e+29	-499765	-38.44	1.62	256.29	270.05	2.43	0	12.99	233	51	527	223	14.27	9.82	9.18	20.43	-2.61	-2.2	9.07	121	1	1	4	0
Betaine	Pure water	Pure methanol	50% B isocratic elution	0.705597	0.81	-1.58	-0.47	1.1	-2.13	-4.67	1.14	0	-4.78	25.03	0.5	0	2	1	8	87.6	1.11e+18	-252565	-41.59	0.81	153.39	154.86	2.19	0	15.35	178	181	468	789	21.46	0.08	1.63	14.25	-9.97	-2.66	15.47	40.1	0	0	1	0
Cytosine	Pure water	Pure methanol	50% B isocratic elution	0.689933	1.14	-0.3	0.33	-0.66	-1.87	-4.1	-0.01	0	-3.74	25.03	-1.7	2	2	0	8	170	1110000000000	-247927	-34.38	0.87	136.73	126.12	2.1	0	12.89	167	25.9	432	122	12.95	9.67	6.77	18.33	-4	-2.61	13.02	67.5	1	1	3	0
Hypoxanthine	Pure water	Pure methanol	50% B isocratic elution	-0.00595987	-0.16	-0.46	1.31	-0.98	-1.49	-4.43	-0.59	0	-3.23	25.03	-0.5	2	3	0	10	190	11100000000000	-305849	-25.27	0.97	150.2	143.93	2.16	0.01	2.51	159	5.76	351	-26.8	8.83	8.14	3.33	11.33	-6.92	-2.86	2.6	70.1	2	2	4	0
Xanthine	Pure water	Pure methanol	50% B isocratic elution	-0.599322	-1.08	-0.57	1.37	-1.1	-1.47	-4.68	-0.59	0	-3.07	25.03	-0.7	3	3	0	11	217	111000000000000	-353097	-23.72	1.25	159.89	153.96	2.19	0.01	6.06	170	-15.1	367	-128	7.64	10.2	7.74	22.93	-2.99	-2.73	6.1	86.9	2	2	4	0
Guanine	Pure water	Pure methanol	50% B isocratic elution	0.147789	0.13	-0.64	0.35	-1.27	-1.86	-4.84	-0.59	0	-3.43	25.03	-1.1	3	3	0	11	225	1110000000000000	-340610	-30.43	1.22	164.42	158.81	2.2	0.01	3.28	191	-7.34	441	-50.1	10.78	11.63	4.81	13.86	-5.99	-2.81	3.34	96.2	2	2	5	0
Adenine	Pure water	Pure methanol	50% B isocratic elution	0.826947	1.2	-0.7	0.65	-1.2	-1.6	-4.6	-0.59	0	-3.15	25.03	-0.1	2	4	0	10	127	111000000000000	-293365	-30.51	0.99	153.88	148.09	2.17	0	11.17	161	9.31	380	47.5	10.2	8.73	5.5	15	-4.52	-2.45	11.33	80.5	2	2	5	0
Beta-Thymidine	Pure water	Pure methanol	50% B isocratic elution	-1.62087	-1.93	-1.28	1.16	-1.6	-1.53	-7.34	-0.97	0	-2.6	25.03	-1.2	3	5	2	17	381	1.11e+30	-549390	-24.52	1.42	246.36	266.66	2.43	0.01	4.01	176	50.1	310	96.6	9.28	5.39	15.53	45.1	-0.93	-3.96	6.43	99.1	1	2	2	0
Cytidine	Pure water	Pure methanol	50% B isocratic elution	-0.618176	-0.32	-1.6	-2.05	-2.07	-2.32	-7.04	-0.97	0	-3.1	25.03	-2.1	4	5	2	17	383	1.11e+29	-559442	-33.42	1.74	241.37	261.47	2.42	0.01	6.86	228	40.6	467	146	13.35	9.24	15.82	45.67	-2.4	-3.46	9.4	129	1	2	3	0
Inosine	Pure water	Pure methanol	50% B isocratic elution	-1.33471	-1.44	-1.79	-1.34	-2.54	-2.37	-7.53	-1.55	0	-2.99	25.03	-1.3	4	7	2	19	405	1.11e+30	-617361	-37.38	1.8	261.27	285.84	2.46	0.01	9.42	243	21.5	459	3.18	11.36	10.23	10.31	29.87	-2.75	-2.08	9.18	129	2	3	4	0
Xanthosine	Pure water	Pure methanol	50% B isocratic elution	-1.11103	-0.85	-1.77	-1.92	-2.41	-2.32	-7.6	-1.55	0	-2.9	25.03	-2.4	5	7	2	20	434	1.11e+31	-664603	-37.75	1.91	265.99	291.82	2.47	0.01	15.45	240	28.5	439	14	11	9.33	12.24	32.43	-2.45	-3.34	12.18	146	2	3	4	0
Guanosine	Pure water	Pure methanol	50% B isocratic elution	-0.881428	-1.3	-2.04	-2.39	-2.88	-2.63	-7.97	-1.55	0	-3.07	25.03	-1.9	5	7	2	20	446	1.11e+32	-652123	-42.64	2.09	276.17	298.73	2.48	0.01	11.43	271	-5.63	543	-85.9	12.26	14.35	13.14	36.02	-2.86	-2.22	11.13	155	2	3	5	0
Uridine	Pure water	Pure methanol	50% B isocratic elution	-0.939199	-0.63	-1.34	-0.25	-1.56	-1.56	-6.82	-0.97	0	-2.67	25.03	-2	4	6	2	17	371	1.11e+28	-571934	-25.98	1.71	235.87	256.94	2.41	0.01	5.57	194	28.6	328	37.3	8.29	6.3	11.64	34.25	-0.98	-1.56	4.28	119	1	2	2	0
Adenosine	Pure water	Pure methanol	50% B isocratic elution	-0.0431453	0.06	-1.42	0.66	-2.36	-1.46	-7.51	-1.55	0	-2.04	25.03	-1.1	4	8	2	19	335	1.11e+31	-604889	-23.66	1.73	253.58	283.19	2.45	0.01	2.18	191	36.3	322	107	8.99	5.54	14.19	39.95	-0.74	-3.53	3.84	140	2	3	5	0
D-Pantothenic acid	Pure water	Pure methanol	65% B isocratic elution	-0.972992	-1.22	-1.45	1.6	-0.27	-1.87	-7.43	1.14	0	-3.34	27.13	-1.1	4	5	6	15	239	1.11e+31	-492236	-26.02	1.56	247.96	269.32	2.43	0	7.46	186	7.26	354	-39.4	8.13	8.95	6.22	23.15	-1.05	-7.18	4.69	107	0	0	1	0
Niacinamide	Pure water	Pure methanol	65% B isocratic elution	0.425534	0.64	-0.43	3.02	-0.45	-0.87	-4.73	-0.01	0	-2.8	27.13	-0.4	1	2	1	9	114	111000000000000	-261773	-16.8	0.79	152.74	146.35	2.17	0	2.95	112	27.7	215	95.8	7.01	3.68	5.08	12.91	-3.24	-5.1	4.94	56	1	1	2	0
Pyridoxal	Pure water	Pure methanol	65% B isocratic elution	0.557326	1.05	-0.63	2.47	-0.94	-1.12	-5.71	-0.01	0	-2.48	27.13	0	2	4	2	12	162	1.11e+20	-370806	-16.87	1.08	190.02	193.09	2.29	0.01	3.53	121	8.31	226	-19.7	4.94	5.51	5.04	18.08	-1.4	-2.71	3.58	70.4	1	1	1	0
Pyridoxine	Pure water	Pure methanol	65% B isocratic elution	1.15972	1.65	-0.89	1.77	-1.1	-1.35	-5.88	-0.01	0	-2.71	27.13	-0.8	3	4	2	12	142	1.11e+22	-371565	-22.39	1.06	195.11	198.18	2.3	0	9.44	137	11.5	264	32	6.46	6.06	11.25	32	0.01	-3.22	2.9	73.6	1	1	1	0
Pyridoxamine	Pure water	Pure methanol	65% B isocratic elution	1.02095	1.48	-0.82	2.14	-1.04	-1.41	-6.03	-0.01	0	-2.66	27.13	-1	3	4	2	12	143	1.11e+23	-359090	-19.85	1.23	199.15	205.79	2.31	0.01	2.37	144	49.5	321	233	9.73	4.96	8.51	18.04	-0.23	-3.37	4.35	79.4	1	1	2	0
Thiamine	Pure water	Pure methanol	65% B isocratic elution	0.73757	1.27	0	0	-1.12	-1.35	-9.35	-0.97	0	-3.25	27.13	0	2	6	4	19	269	1.11e+34	-727954	-65.42	1.49	291.55	320.17	2.51	-0.99	0	200	-71.2	335	-70.9	6.56	7.95	14.5	36.27	1.75	-2.99	10.15	104	2	2	4	1
Nicotinic acid	Pure water	Pure methanol	65% B isocratic elution	0.096474	-0.22	-0.22	3.56	-0.65	-0.87	-4.47	-0.01	0	-2.41	27.13	0.4	1	3	1	9	114	11100000000000	-274248	-12.08	0.77	149.15	142	2.15	0	0.88	92.9	1.16	177	-39.1	3.37	4.37	3.73	20.67	-2.73	-2.8	3.67	50.2	1	1	1	0
Alanine	Pure water	Pure methanol	65% B isocratic elution	-0.23191	-0.36	-0.24	3.79	0.65	-1.01	-3.62	1.14	0	-3.06	27.13	-3	2	3	1	6	61.8	1110000000000	-203245	-12.07	0.88	123.86	112.49	2.05	0	1.93	103	20.6	223	81.1	5.25	4.15	6.92	15.51	-0.69	-4.07	2.88	63.3	0	0	1	0
Leucine	Pure water	Pure methanol	65% B isocratic elution	0.249868	0.17	-0.29	3.98	0.31	-0.88	-5.4	1.14	0	-2.69	27.13	-1.5	2	3	3	9	101	1.11e+21	-277279	-11.49	0.91	176.64	178.51	2.25	0	1.75	97.3	10	188	15.9	4.1	4.03	4.32	23.12	-1.46	-4.42	4.6	63.3	0	0	1	0
Isoleucine	Pure water	Pure methanol	65% B isocratic elution	0.261689	0.22	-0.29	3.99	0.28	-0.85	-5.35	1.14	0	-2.66	27.13	-1.7	2	3	3	9	103	1.11e+21	-277278	-11.39	0.9	174.76	177.8	2.25	0	1.86	95.2	4.07	178	-13.2	3.66	4.06	5.29	24.73	-0.48	-4.81	8.21	63.3	0	0	1	0
Valine	Pure water	Pure methanol	65% B isocratic elution	0.14513	0.08	-0.35	3.48	0.99	-0.56	-4.74	1.14	0	-3.09	27.13	-2.3	2	3	2	8	90.4	1.11e+18	-252603	-16.64	0.58	154.87	154.22	2.19	0	7.95	86.9	30.2	126	74.6	3.87	1.16	5.48	13.49	-1.89	-5.23	8.12	63.3	0	0	1	0
Proline	Pure water	Pure methanol	65% B isocratic elution	0.294866	0.27	-0.31	3.62	-0.4	-0.92	-4.44	0.18	0	-2.61	27.13	-2.5	2	3	1	8	103	1.11e+16	-251835	-13.13	0.77	147.6	142.26	2.15	0	3.61	94.9	18	192	36.7	4.47	4	3.51	21.36	-3.35	-4.13	3.48	49.3	1	1	1	0
Phenylalanine	Pure water	Pure methanol	65% B isocratic elution	0.141438	0	-0.65	2.97	-0.71	-0.95	-6.16	-0.01	0	-2.55	27.13	-1.5	2	3	3	12	153	1.11e+22	-348280	-15.74	1.01	200.74	208.03	2.32	0	2.66	122	9.49	216	30.8	4.48	4.38	4.16	22.91	-1.94	-2.63	7.78	63.3	0	1	1	0
Methionine	Pure water	Pure methanol	65% B isocratic elution	-0.166605	-0.32	-0.59	3.26	0.27	-1.01	-5.9	1.14	0	-2.96	27.13	-1.9	2	4	4	9	97	1.11e+19	-502501	-15.83	1.08	186.45	185.96	2.27	0.01	4.25	126	19.1	229	42.1	4.86	4.41	4.94	22.93	-1.51	-3.09	4.05	88.6	0	0	1	1
Tryptophan	Pure water	Pure methanol	65% B isocratic elution	-0.268585	-0.43	-1.12	1.74	-1.46	-1.13	-7.19	-0.59	0	-2.51	27.13	-1.1	3	3	3	15	245	1.11e+26	-430876	-21.02	1.24	233.33	250.05	2.4	0	5.34	153	-10.6	271	-20.2	4.73	6.7	4.11	22.25	-1.98	-4.08	5.74	79.1	1	2	2	0
Serine	Pure water	Pure methanol	65% B isocratic elution	-0.527224	-0.87	-0.37	2.82	0.64	-1.04	-3.78	1.14	0	-3.16	27.13	-3.1	3	4	2	7	72.6	11100000000000	-250467	-14.94	1.06	132.32	122.02	2.09	0	3.06	118	4.07	216	-33.2	4.49	4.85	3.58	19.55	-4.08	-3.26	0.99	83.6	0	0	1	0
Glutamine	Pure water	Pure methanol	65% B isocratic elution	-0.51945	-0.7	-0.77	1.53	0.5	-1.59	-5.28	1.14	0	-3.77	27.13	-3.1	3	4	4	10	146	1.11e+19	-333835	-24.89	1.35	180.5	176.05	2.25	0	6.95	174	25	351	64	9.61	7.18	5.6	22.19	-3.61	-5.52	7.53	106	0	0	2	0
Threonine	Pure water	Pure methanol	65% B isocratic elution	-0.303308	-0.7	-0.44	3.49	0.41	-1.07	-4.35	1.14	0	-2.96	27.13	-2.9	3	4	2	8	93.3	1.11e+16	-275147	-14.56	1.14	149.43	144.38	2.16	0.01	4	119	6.4	228	-10.9	5.24	4.98	2.45	17.53	-4.59	-5.42	3.68	83.6	0	0	1	0
Cysteine	Pure water	Pure methanol	65% B isocratic elution	-0.794593	-1.27	-0.45	3.62	0.22	-0.81	-4.7	1.14	0	-2.79	27.13	-2.5	3	4	2	7	75.3	11100000000000	-453148	-13.45	1	147.18	141.36	2.15	0.01	3.06	108	-15.6	173	-97.6	1.79	4.69	5.27	20.11	-1.25	-3.34	5	64.3	0	0	1	1
Asparagine	Pure water	Pure methanol	65% B isocratic elution	-0.629581	-1.05	-0.53	2.07	0.71	-1.62	-4.61	1.14	0	-3.98	27.13	-3.4	3	4	3	9	134	1.11e+16	-309157	-24.85	1.33	160.84	155.26	2.19	0	3.88	177	14.7	352	34.5	9.05	7.57	3.77	19.29	-6.05	-4.96	6.4	106	0	0	2	0
Glutamicacid	Pure water	Pure methanol	65% B isocratic elution	-0.680504	-1.95	-0.65	2.12	0.92	-1.22	-4.97	1.14	0	-3.79	27.13	-3.7	3	5	4	10	145	1.11e+18	-346311	-25.1	1.06	172.73	167.41	2.22	0	8.05	150	9.3	247	-26.7	4.8	5.32	4.16	20.54	-4.48	-4.16	4.84	101	0	0	1	1
Lysine	Pure water	Pure methanol	65% B isocratic elution	-0.0182773	0.27	-0.79	2.83	0.9	-0.99	-5.83	1.14	0	-3.45	27.13	-3	3	4	5	10	106	1.11e+23	-312026	-21.17	0.86	191.1	191.01	2.28	0	5.99	127	75.3	255	325	8.64	1.15	8.95	18.74	-1	-1.73	0.96	89.3	0	0	2	0
Arginine	Pure water	Pure methanol	65% B isocratic elution	0.414789	0.95	-1.12	1.47	0.67	-1.35	-6.49	1.14	0	-3.8	27.13	-4.2	4	4	5	12	176	1.11e+25	-380778	-28.48	1.38	214.93	214.24	2.33	0	9.11	182	56.4	339	241	10.62	3.9	10.66	22.26	-2.7	-2.93	1.97	128	0	0	4	0
Histidine	Pure water	Pure methanol	65% B isocratic elution	0.221866	0.49	-0.73	1.3	0.12	-1.21	-5.4	0.18	0	-3.67	27.13	-3.2	3	4	3	11	151	1.11e+19	-344509	-27.47	0.98	180.91	181.77	2.26	0	5.04	160	36.7	296	139	8.38	4.38	5.7	14.6	-3.9	-4.52	8.26	92	1	1	3	0
Citrulline	Pure water	Pure methanol	65% B isocratic elution	-0.667968	-0.9	-1.1	1.3	0.38	-1.92	-6.35	1.14	0	-4.04	27.13	-4.3	4	4	5	12	171	1.11e+24	-393268	-29.64	1.53	214.73	215.15	2.33	0	7.6	204	40.5	433	151	12.42	8.36	5.05	24.14	-4.38	-3.03	2.31	118	0	0	3	0
Taurine	Pure water	Pure methanol	65% B isocratic elution	-0.960121	-0.99	-0.52	3.08	0.74	-1.25	-4.07	1.14	0	-3.53	27.13	-4.1	2	4	2	7	120	11100000000000	-476406	-18.56	1.09	143.51	133.49	2.13	0.01	3.57	138	-7.89	285	-71.8	4.16	6.16	-2.47	10.55	-10.36	-3.86	3.47	88.8	0	0	1	1
Tyrosine	Pure water	Pure methanol	65% B isocratic elution	0.381086	0.83	-1.04	2.22	-0.95	-1.47	-6.3	-0.01	0	-2.9	27.13	-2.3	3	4	3	13	176	1.11e+23	-395507	-20.45	1.27	210.41	219.03	2.34	0	4.34	158	-11.2	301	-58.2	5.35	7.81	4.18	23.28	-2.58	-2.6	8.84	83.6	0	1	1	0
Hypotaurine	Pure water	Pure methanol	65% B isocratic elution	-0.714456	-0.94	-0.39	3.16	0.64	-1.23	-4.16	1.14	0	-3.48	27.13	-1.5	2	4	2	6	55.5	1110000000000	-429187	-19.14	0.95	136.46	125.99	2.1	0	5.56	129	43.8	272	164	8.05	3.84	8.34	19	-1.9	-2.55	5.19	82.5	0	0	1	1
L-Hydroxyproline	Pure water	Pure methanol	65% B isocratic elution	-0.228181	-0.44	-0.57	2.82	-0.44	-1.46	-4.54	0.18	0	-3.11	27.13	-3.3	3	4	1	9	125	1.11e+17	-299059	-18.75	1.12	155.95	154.27	2.19	0	3.05	140	34.4	301	118	8.1	5.75	7.9	18.5	-1.19	-2.19	3.72	69.6	1	1	1	0
N-omiga-acetylhistamine	Pure water	Pure methanol	65% B isocratic elution	1.27565	1.72	-0.92	2.28	-0.22	-1.31	-6.09	0.18	0	-3.42	27.13	-0.4	2	2	3	11	138	1.11e+21	-321960	-23.57	0.83	195.51	194.44	2.29	0	4.66	148	58.4	320	214	11.2	4.88	6.06	14.64	-2.8	-2.61	4.77	57.8	1	1	3	0
L-pyroglutamic acid	Pure water	Pure methanol	65% B isocratic elution	-0.725478	-1.06	-0.51	2.43	-0.17	-1.28	-4.4	0.18	0	-3.28	27.13	-0.8	2	3	1	9	154	1110000000000000	-298326	-20.95	0.96	151.34	146.44	2.17	0	7.17	137	11.3	267	-26.3	6.36	6.48	3.66	21.17	-4.87	-2.3	6.22	66.4	1	1	1	0
Tyramine	Pure water	Pure methanol	65% B isocratic elution	0.455281	1.13	-0.48	3.22	-0.79	-0.96	-5.75	-0.01	0	-2.51	27.13	1.1	2	2	2	10	87.3	1.11e+20	-277120	-13.98	0.82	183.62	181.83	2.26	0	2.6	106	27.2	227	168	5.88	3.52	8.82	18.57	0.95	-2.63	3.17	46.2	0	1	1	0
Histamine	Pure water	Pure methanol	65% B isocratic elution	0.378529	0.1	-0.63	2.94	-0.19	-1.12	-4.82	0.18	0	-3.11	27.13	-0.7	2	2	2	8	64.7	1.11e+16	-226118	-18.32	0.8	155.19	146.49	2.17	0	4.89	122	68.6	307	360	10.5	2.98	8.7	18.47	-1.26	-2.85	4.92	54.7	1	1	3	0
AaC	Pure water	Pure methanol	65% B isocratic elution	1.03135	1.7	-0.68	2.2	-2.2	-0.53	-6.74	-1.36	0.01	-1.73	27.13	2.6	2	2	0	14	219	1.11e+22	-369670	-14.85	0.86	210.7	216.51	2.34	0	2.51	108	-19	154	-31.5	2.67	3.95	5.78	12.59	0.02	-2.83	2.59	54.7	2	3	3	0
IQx	Pure water	Pure methanol	65% B isocratic elution	1.10151	1.57	-0.97	0.96	-1.92	-1.07	-6.8	-1.36	0	-2.35	27.13	0.6	1	4	0	15	246	1.11e+23	-414479	-25.04	0.93	218.25	227.81	2.36	0.01	8.8	141	56.1	274	235	9.64	3.08	5.71	14.84	-2.23	-2.75	8.88	69.6	2	3	5	0
8-MeIQx	Pure water	Pure methanol	65% B isocratic elution	1.10902	1.59	-1.1	0.92	-2.05	-1.09	-7.45	-1.36	0	-2.26	27.13	1	1	4	0	16	271	1.11e+26	-439162	-25.13	0.98	237.6	249.06	2.4	0.01	7.72	142	63.8	281	265	10.06	2.97	5.88	15.22	-1.59	-1.95	7.78	69.6	2	3	5	0
MeIQ	Pure water	Pure methanol	65% B isocratic elution	1.24011	1.69	-0.92	1.35	-2.24	-0.79	-7.53	-1.36	0.01	-1.85	27.13	2	1	3	0	16	270	1.11e+27	-429091	-21.18	0.93	236.91	253.92	2.4	0	9.17	124	38.5	216	166	7.22	2.74	7.22	16.13	0.27	-4.33	9.28	56.7	2	3	4	0
IQ[4,5-b]	Pure water	Pure methanol	65% B isocratic elution	1.09003	1.59	-1.04	0.7	-2.02	-1.05	-7.05	-1.36	0	-2.38	27.13	1.7	1	3	0	15	245	1.11e+24	-404413	-27.45	0.9	223.43	232.81	2.37	0	10.84	139	39.2	269	182	8.87	4.02	6.83	16.69	-0.82	-4.58	11	56.7	2	3	4	0
Harman	Pure water	Pure methanol	65% B isocratic elution	1.35884	1.83	-0.33	2.69	-2.23	-0.45	-6.95	-1.36	0.01	-1.53	27.13	3.6	1	1	0	14	216	1.11e+23	-359587	-12.73	0.59	214.44	223.28	2.35	0	4.55	81.6	10	132	63.3	3.7	2.33	7.72	16.34	1.94	-4.95	4.58	28.7	2	3	2	0
IQ	Pure water	Pure methanol	65% B isocratic elution	1.32879	1.77	-0.84	1.43	-2.16	-0.77	-7.05	-1.36	0	-1.93	27.13	1.5	1	3	0	15	245	1.11e+24	-404413	-20.86	0.92	222.22	233.02	2.37	0	8.83	123	32.7	213	148	6.9	2.78	7	15.75	-0.15	-2.69	8.95	56.7	2	3	4	0
Norharman	Pure water	Pure methanol	65% B isocratic elution	1.30003	1.84	-0.4	2.73	-2.1	-0.51	-6.34	-1.36	0.01	-1.73	27.13	3.2	1	1	0	13	193	1.11e+20	-334905	-13.23	0.56	196.55	201.82	2.3	0	4.61	85.1	3.38	142	46.2	3.74	2.88	7.61	16.32	1.37	-4.84	4.64	28.7	2	3	2	0
DMIP	Pure water	Pure methanol	65% B isocratic elution	1.29641	1.77	-0.89	1.51	-1.05	-1.1	-6.11	-0.59	0	-2.77	27.13	1	1	3	0	12	172	1.11e+21	-332645	-25.27	0.81	195.56	198.01	2.3	0.01	9.99	128	57.4	269	243	9.75	3.19	7.16	17.5	-1.15	-4.24	10.15	56.7	2	2	4	0
Phe-p-1	Pure water	Pure methanol	65% B isocratic elution	1.36555	1.91	-0.38	2.74	-1.95	-0.43	-6.74	-1.16	0.01	-1.67	27.13	2.3	1	2	1	13	152	1.11e+22	-335660	-12.87	0.73	209.56	213.73	2.33	0	3.22	91.3	4.88	123	51	3.16	1.78	7	14.9	1.32	-6	3.7	38.9	1	2	2	0
7,8-DiMeIQx	Pure water	Pure methanol	65% B isocratic elution	1.18997	1.74	-1.19	0.84	-2.18	-1.1	-8.02	-1.36	0	-2.15	27.13	1.4	1	4	0	17	297	1.11e+29	-463843	-25.35	1.03	254.55	269.67	2.43	0.01	6.62	143	68.9	284	281	10.44	2.87	6.01	15.48	-1.09	-4.51	6.74	69.6	2	3	5	0
Sarcosine	Pure water	Pure methanol	65% B isocratic elution	-0.230635	-0.36	-0.2	4.28	0.66	-0.95	-3.78	1.14	0	-3.04	27.13	-2.8	2	3	2	6	52.8	1110000000000	-203238	-12.38	0.78	127.98	113.01	2.05	0	2.92	94.2	17.5	201	42.4	4.57	4.19	4.37	24.65	-2.74	-4.93	8.22	49.3	0	0	1	0
Creatinine	Pure water	Pure methanol	65% B isocratic elution	0.85092	1.2	-0.52	1.29	0.1	-1.4	-4.37	0.18	0	-3.75	27.13	-1.8	1	1	0	8	151	111000000000000	-248681	-30.05	0.8	143.83	134.46	2.13	0	11.98	146	74.4	333	274	12.86	4.35	5.11	15.98	-5.3	-5.49	12.08	58.7	1	1	3	0
L-dihydroorotic acid	Pure water	Pure methanol	65% B isocratic elution	-1.77813	-1.53	-0.62	1.72	-0.43	-1.49	-4.72	-0.01	0	-3.38	27.13	-1.5	3	4	1	11	225	1.11e+16	-379565	-23.86	1.38	167.39	163.4	2.21	0.01	5.18	172	-17.2	327	-144	5.51	8.7	2.35	17.25	-6.68	-4.92	4.87	95.5	1	1	2	0
L-Carnosine	Pure water	Pure methanol	65% B isocratic elution	-0.0133149	0.29	-1.49	-0.26	-0.6	-2.19	-7.61	0.18	0	-3.96	27.13	-4	4	5	6	16	259	1.11e+29	-499765	-38.44	1.62	256.29	270.05	2.43	0	12.99	233	51	527	223	14.27	9.82	9.18	20.43	-2.61	-2.2	9.07	121	1	1	4	0
Betaine	Pure water	Pure methanol	65% B isocratic elution	0.728845	1.02	-1.25	-0.47	1.36	-1.96	-4.71	1.14	0	-4.95	27.13	0.5	0	2	1	8	87.6	1.11e+18	-252565	-41.59	0.81	153.39	154.86	2.19	0	15.35	178	181	468	789	21.46	0.08	1.63	14.25	-9.97	-2.66	15.47	40.1	0	0	1	0
Cytosine	Pure water	Pure methanol	65% B isocratic elution	0.665042	1.03	-0.06	0.33	-0.49	-1.73	-4.14	-0.01	0	-3.87	27.13	-1.7	2	2	0	8	170	1110000000000	-247927	-34.38	0.87	136.73	126.12	2.1	0	12.89	167	25.9	432	122	12.95	9.67	6.77	18.33	-4	-2.61	13.02	67.5	1	1	3	0
Hypoxanthine	Pure water	Pure methanol	65% B isocratic elution	-0.012113	-0.11	-0.29	1.31	-0.88	-1.37	-4.48	-0.59	0	-3.34	27.13	-0.5	2	3	0	10	190	11100000000000	-305849	-25.27	0.97	150.2	143.93	2.16	0.01	2.51	159	5.76	351	-26.8	8.83	8.14	3.33	11.33	-6.92	-2.86	2.6	70.1	2	2	4	0
Xanthine	Pure water	Pure methanol	65% B isocratic elution	-0.638183	-1.18	-0.43	1.37	-1.05	-1.35	-4.73	-0.59	0	-3.15	27.13	-0.7	3	3	0	11	217	111000000000000	-353097	-23.72	1.25	159.89	153.96	2.19	0.01	6.06	170	-15.1	367	-128	7.64	10.2	7.74	22.93	-2.99	-2.73	6.1	86.9	2	2	4	0
Guanine	Pure water	Pure methanol	65% B isocratic elution	0.111065	0	-0.41	0.35	-1.14	-1.72	-4.89	-0.59	0	-3.56	27.13	-1.1	3	3	0	11	225	1110000000000000	-340610	-30.43	1.22	164.42	158.81	2.2	0.01	3.28	191	-7.34	441	-50.1	10.78	11.63	4.81	13.86	-5.99	-2.81	3.34	96.2	2	2	5	0
Adenine	Pure water	Pure methanol	65% B isocratic elution	0.781557	1.18	-0.53	0.65	-1.12	-1.48	-4.64	-0.59	0	-3.26	27.13	-0.1	2	4	0	10	127	111000000000000	-293365	-30.51	0.99	153.88	148.09	2.17	0	11.17	161	9.31	380	47.5	10.2	8.73	5.5	15	-4.52	-2.45	11.33	80.5	2	2	5	0
Cytidine	Pure water	Pure methanol	65% B isocratic elution	-0.646829	-0.44	-1.44	-2.05	-2.07	-2.15	-7.12	-0.97	0	-3.2	27.13	-2.1	4	5	2	17	383	1.11e+29	-559442	-33.42	1.74	241.37	261.47	2.42	0.01	6.86	228	40.6	467	146	13.35	9.24	15.82	45.67	-2.4	-3.46	9.4	129	1	2	3	0
Inosine	Pure water	Pure methanol	65% B isocratic elution	-1.33856	-1.21	-1.62	-1.34	-2.55	-2.19	-7.63	-1.55	0	-3.09	27.13	-1.3	4	7	2	19	405	1.11e+30	-617361	-37.38	1.8	261.27	285.84	2.46	0.01	9.42	243	21.5	459	3.18	11.36	10.23	10.31	29.87	-2.75	-2.08	9.18	129	2	3	4	0
Xanthosine	Pure water	Pure methanol	65% B isocratic elution	-1.13191	-0.83	-1.62	-1.92	-2.45	-2.14	-7.7	-1.55	0	-2.99	27.13	-2.4	5	7	2	20	434	1.11e+31	-664603	-37.75	1.91	265.99	291.82	2.47	0.01	15.45	240	28.5	439	14	11	9.33	12.24	32.43	-2.45	-3.34	12.18	146	2	3	4	0
Guanosine	Pure water	Pure methanol	65% B isocratic elution	-0.904864	-1.27	-1.84	-2.39	-2.88	-2.43	-8.07	-1.55	0	-3.18	27.13	-1.9	5	7	2	20	446	1.11e+32	-652123	-42.64	2.09	276.17	298.73	2.48	0.01	11.43	271	-5.63	543	-85.9	12.26	14.35	13.14	36.02	-2.86	-2.22	11.13	155	2	3	5	0
Uridine	Pure water	Pure methanol	65% B isocratic elution	-0.937476	-0.47	-1.31	-0.25	-1.69	-1.43	-6.9	-0.97	0	-2.71	27.13	-2	4	6	2	17	371	1.11e+28	-571934	-25.98	1.71	235.87	256.94	2.41	0.01	5.57	194	28.6	328	37.3	8.29	6.3	11.64	34.25	-0.98	-1.56	4.28	119	1	2	2	0
Adenosine	Pure water	Pure methanol	65% B isocratic elution	-0.0801026	-0.18	-1.43	0.66	-2.56	-1.33	-7.59	-1.55	0	-2.07	27.13	-1.1	4	8	2	19	335	1.11e+31	-604889	-23.66	1.73	253.58	283.19	2.45	0.01	2.18	191	36.3	322	107	8.99	5.54	14.19	39.95	-0.74	-3.53	3.84	140	2	3	5	0
D-Pantothenic acid	Pure water	Pure methanol	80% B isocratic elution	-0.981101	-1.29	-1.4	1.6	-0.38	-1.75	-7.49	1.14	0	-3.39	29.24	-1.1	4	5	6	15	239	1.11e+31	-492236	-26.02	1.56	247.96	269.32	2.43	0	7.46	186	7.26	354	-39.4	8.13	8.95	6.22	23.15	-1.05	-7.18	4.69	107	0	0	1	0
Niacinamide	Pure water	Pure methanol	80% B isocratic elution	0.414648	0.64	-0.39	3.02	-0.48	-0.79	-4.77	-0.01	0	-2.84	29.24	-0.4	1	2	1	9	114	111000000000000	-261773	-16.8	0.79	152.74	146.35	2.17	0	2.95	112	27.7	215	95.8	7.01	3.68	5.08	12.91	-3.24	-5.1	4.94	56	1	1	2	0
Pyridoxal	Pure water	Pure methanol	80% B isocratic elution	0.551363	0.94	-0.66	2.47	-1.09	-1.05	-5.77	-0.01	0	-2.49	29.24	0	2	4	2	12	162	1.11e+20	-370806	-16.87	1.08	190.02	193.09	2.29	0.01	3.53	121	8.31	226	-19.7	4.94	5.51	5.04	18.08	-1.4	-2.71	3.58	70.4	1	1	1	0
Pyridoxine	Pure water	Pure methanol	80% B isocratic elution	1.16092	1.65	-0.88	1.77	-1.2	-1.27	-5.93	-0.01	0	-2.74	29.24	-0.8	3	4	2	12	142	1.11e+22	-371565	-22.39	1.06	195.11	198.18	2.3	0	9.44	137	11.5	264	32	6.46	6.06	11.25	32	0.01	-3.22	2.9	73.6	1	1	1	0
Pyridoxamine	Pure water	Pure methanol	80% B isocratic elution	1.02655	1.47	-0.8	2.14	-1.14	-1.31	-6.09	-0.01	0	-2.69	29.24	-1	3	4	2	12	143	1.11e+23	-359090	-19.85	1.23	199.15	205.79	2.31	0.01	2.37	144	49.5	321	233	9.73	4.96	8.51	18.04	-0.23	-3.37	4.35	79.4	1	1	2	0
Thiamine	Pure water	Pure methanol	80% B isocratic elution	0.742934	1.32	0	0	-1.26	-1.26	-9.42	-0.97	0	-3.28	29.24	0	2	6	4	19	269	1.11e+34	-727954	-65.42	1.49	291.55	320.17	2.51	-0.99	0	200	-71.2	335	-70.9	6.56	7.95	14.5	36.27	1.75	-2.99	10.15	104	2	2	4	1
Nicotinic acid	Pure water	Pure methanol	80% B isocratic elution	0.0739207	-0.41	-0.26	3.56	-0.78	-0.81	-4.52	-0.01	0	-2.42	29.24	0.4	1	3	1	9	114	11100000000000	-274248	-12.08	0.77	149.15	142	2.15	0	0.88	92.9	1.16	177	-39.1	3.37	4.37	3.73	20.67	-2.73	-2.8	3.67	50.2	1	1	1	0
Alanine	Pure water	Pure methanol	80% B isocratic elution	-0.244821	-0.46	-0.24	3.79	0.61	-0.94	-3.65	1.14	0	-3.09	29.24	-3	2	3	1	6	61.8	1110000000000	-203245	-12.07	0.88	123.86	112.49	2.05	0	1.93	103	20.6	223	81.1	5.25	4.15	6.92	15.51	-0.69	-4.07	2.88	63.3	0	0	1	0
Leucine	Pure water	Pure methanol	80% B isocratic elution	0.236735	0.09	-0.36	3.98	0.13	-0.82	-5.44	1.14	0	-2.69	29.24	-1.5	2	3	3	9	101	1.11e+21	-277279	-11.49	0.91	176.64	178.51	2.25	0	1.75	97.3	10	188	15.9	4.1	4.03	4.32	23.12	-1.46	-4.42	4.6	63.3	0	0	1	0
Isoleucine	Pure water	Pure methanol	80% B isocratic elution	0.242503	0.13	-0.37	3.99	0.1	-0.8	-5.39	1.14	0	-2.65	29.24	-1.7	2	3	3	9	103	1.11e+21	-277278	-11.39	0.9	174.76	177.8	2.25	0	1.86	95.2	4.07	178	-13.2	3.66	4.06	5.29	24.73	-0.48	-4.81	8.21	63.3	0	0	1	0
Valine	Pure water	Pure methanol	80% B isocratic elution	0.141391	-0.02	-0.36	3.48	0.9	-0.51	-4.78	1.14	0	-3.11	29.24	-2.3	2	3	2	8	90.4	1.11e+18	-252603	-16.64	0.58	154.87	154.22	2.19	0	7.95	86.9	30.2	126	74.6	3.87	1.16	5.48	13.49	-1.89	-5.23	8.12	63.3	0	0	1	0
Proline	Pure water	Pure methanol	80% B isocratic elution	0.271402	0.19	-0.34	3.62	-0.5	-0.86	-4.48	0.18	0	-2.62	29.24	-2.5	2	3	1	8	103	1.11e+16	-251835	-13.13	0.77	147.6	142.26	2.15	0	3.61	94.9	18	192	36.7	4.47	4	3.51	21.36	-3.35	-4.13	3.48	49.3	1	1	1	0
Phenylalanine	Pure water	Pure methanol	80% B isocratic elution	0.137071	-0.08	-0.68	2.97	-0.87	-0.89	-6.22	-0.01	0	-2.57	29.24	-1.5	2	3	3	12	153	1.11e+22	-348280	-15.74	1.01	200.74	208.03	2.32	0	2.66	122	9.49	216	30.8	4.48	4.38	4.16	22.91	-1.94	-2.63	7.78	63.3	0	1	1	0
Methionine	Pure water	Pure methanol	80% B isocratic elution	-0.17987	-0.47	-0.62	3.26	0.13	-0.94	-5.95	1.14	0	-2.98	29.24	-1.9	2	4	4	9	97	1.11e+19	-502501	-15.83	1.08	186.45	185.96	2.27	0.01	4.25	126	19.1	229	42.1	4.86	4.41	4.94	22.93	-1.51	-3.09	4.05	88.6	0	0	1	1
Tryptophan	Pure water	Pure methanol	80% B isocratic elution	-0.274512	-0.49	-1.12	1.74	-1.64	-1.06	-7.25	-0.59	0	-2.53	29.24	-1.1	3	3	3	15	245	1.11e+26	-430876	-21.02	1.24	233.33	250.05	2.4	0	5.34	153	-10.6	271	-20.2	4.73	6.7	4.11	22.25	-1.98	-4.08	5.74	79.1	1	2	2	0
Serine	Pure water	Pure methanol	80% B isocratic elution	-0.541068	-0.91	-0.36	2.82	0.6	-0.98	-3.82	1.14	0	-3.2	29.24	-3.1	3	4	2	7	72.6	11100000000000	-250467	-14.94	1.06	132.32	122.02	2.09	0	3.06	118	4.07	216	-33.2	4.49	4.85	3.58	19.55	-4.08	-3.26	0.99	83.6	0	0	1	0
Glutamine	Pure water	Pure methanol	80% B isocratic elution	-0.531238	-0.77	-0.65	1.53	0.53	-1.48	-5.33	1.14	0	-3.85	29.24	-3.1	3	4	4	10	146	1.11e+19	-333835	-24.89	1.35	180.5	176.05	2.25	0	6.95	174	25	351	64	9.61	7.18	5.6	22.19	-3.61	-5.52	7.53	106	0	0	2	0
Threonine	Pure water	Pure methanol	80% B isocratic elution	-0.276462	0.27	-0.46	3.49	0.32	-1	-4.39	1.14	0	-2.98	29.24	-2.9	3	4	2	8	93.3	1.11e+16	-275147	-14.56	1.14	149.43	144.38	2.16	0.01	4	119	6.4	228	-10.9	5.24	4.98	2.45	17.53	-4.59	-5.42	3.68	83.6	0	0	1	0
Cysteine	Pure water	Pure methanol	80% B isocratic elution	-0.802926	-1.8	-0.48	3.62	0.11	-0.76	-4.75	1.14	0	-2.8	29.24	-2.5	3	4	2	7	75.3	11100000000000	-453148	-13.45	1	147.18	141.36	2.15	0.01	3.06	108	-15.6	173	-97.6	1.79	4.69	5.27	20.11	-1.25	-3.34	5	64.3	0	0	1	1
Asparagine	Pure water	Pure methanol	80% B isocratic elution	-0.619572	-1.11	-0.37	2.07	0.8	-1.5	-4.65	1.14	0	-4.08	29.24	-3.4	3	4	3	9	134	1.11e+16	-309157	-24.85	1.33	160.84	155.26	2.19	0	3.88	177	14.7	352	34.5	9.05	7.57	3.77	19.29	-6.05	-4.96	6.4	106	0	0	2	0
Lysine	Pure water	Pure methanol	80% B isocratic elution	-0.0253181	0.22	-0.75	2.83	0.84	-0.9	-5.87	1.14	0	-3.5	29.24	-3	3	4	5	10	106	1.11e+23	-312026	-21.17	0.86	191.1	191.01	2.28	0	5.99	127	75.3	255	325	8.64	1.15	8.95	18.74	-1	-1.73	0.96	89.3	0	0	2	0
Arginine	Pure water	Pure methanol	80% B isocratic elution	0.402419	0.87	-1	1.47	0.68	-1.23	-6.53	1.14	0	-3.88	29.24	-4.2	4	4	5	12	176	1.11e+25	-380778	-28.48	1.38	214.93	214.24	2.33	0	9.11	182	56.4	339	241	10.62	3.9	10.66	22.26	-2.7	-2.93	1.97	128	0	0	4	0
Histidine	Pure water	Pure methanol	80% B isocratic elution	0.208569	0.44	-0.59	1.3	0.16	-1.11	-5.44	0.18	0	-3.76	29.24	-3.2	3	4	3	11	151	1.11e+19	-344509	-27.47	0.98	180.91	181.77	2.26	0	5.04	160	36.7	296	139	8.38	4.38	5.7	14.6	-3.9	-4.52	8.26	92	1	1	3	0
Citrulline	Pure water	Pure methanol	80% B isocratic elution	-0.684633	-1	-0.95	1.3	0.42	-1.78	-6.4	1.14	0	-4.13	29.24	-4.3	4	4	5	12	171	1.11e+24	-393268	-29.64	1.53	214.73	215.15	2.33	0	7.6	204	40.5	433	151	12.42	8.36	5.05	24.14	-4.38	-3.03	2.31	118	0	0	3	0
Taurine	Pure water	Pure methanol	80% B isocratic elution	-0.944624	-0.93	-0.46	3.08	0.73	-1.17	-4.11	1.14	0	-3.58	29.24	-4.1	2	4	2	7	120	11100000000000	-476406	-18.56	1.09	143.51	133.49	2.13	0.01	3.57	138	-7.89	285	-71.8	4.16	6.16	-2.47	10.55	-10.36	-3.86	3.47	88.8	0	0	1	1
Tyrosine	Pure water	Pure methanol	80% B isocratic elution	0.380881	0.82	-1.01	2.22	-1.06	-1.39	-6.36	-0.01	0	-2.93	29.24	-2.3	3	4	3	13	176	1.11e+23	-395507	-20.45	1.27	210.41	219.03	2.34	0	4.34	158	-11.2	301	-58.2	5.35	7.81	4.18	23.28	-2.58	-2.6	8.84	83.6	0	1	1	0
Hypotaurine	Pure water	Pure methanol	80% B isocratic elution	-0.701467	-0.9	-0.31	3.16	0.67	-1.14	-4.2	1.14	0	-3.55	29.24	-1.5	2	4	2	6	55.5	1110000000000	-429187	-19.14	0.95	136.46	125.99	2.1	0	5.56	129	43.8	272	164	8.05	3.84	8.34	19	-1.9	-2.55	5.19	82.5	0	0	1	1
L-Hydroxyproline	Pure water	Pure methanol	80% B isocratic elution	-0.228214	-0.45	-0.51	2.82	-0.44	-1.36	-4.59	0.18	0	-3.16	29.24	-3.3	3	4	1	9	125	1.11e+17	-299059	-18.75	1.12	155.95	154.27	2.19	0	3.05	140	34.4	301	118	8.1	5.75	7.9	18.5	-1.19	-2.19	3.72	69.6	1	1	1	0
N-omiga-acetylhistamine	Pure water	Pure methanol	80% B isocratic elution	1.27766	1.68	-0.81	2.28	-0.22	-1.21	-6.13	0.18	0	-3.5	29.24	-0.4	2	2	3	11	138	1.11e+21	-321960	-23.57	0.83	195.51	194.44	2.29	0	4.66	148	58.4	320	214	11.2	4.88	6.06	14.64	-2.8	-2.61	4.77	57.8	1	1	3	0
L-pyroglutamic acid	Pure water	Pure methanol	80% B isocratic elution	-0.716252	-1.16	-0.42	2.43	-0.16	-1.19	-4.44	0.18	0	-3.35	29.24	-0.8	2	3	1	9	154	1110000000000000	-298326	-20.95	0.96	151.34	146.44	2.17	0	7.17	137	11.3	267	-26.3	6.36	6.48	3.66	21.17	-4.87	-2.3	6.22	66.4	1	1	1	0
Tyramine	Pure water	Pure methanol	80% B isocratic elution	0.45642	1.17	-0.52	3.22	-0.94	-0.9	-5.8	-0.01	0	-2.52	29.24	1.1	2	2	2	10	87.3	1.11e+20	-277120	-13.98	0.82	183.62	181.83	2.26	0	2.6	106	27.2	227	168	5.88	3.52	8.82	18.57	0.95	-2.63	3.17	46.2	0	1	1	0
Histamine	Pure water	Pure methanol	80% B isocratic elution	0.387358	0.08	-0.57	2.94	-0.2	-1.03	-4.86	0.18	0	-3.16	29.24	-0.7	2	2	2	8	64.7	1.11e+16	-226118	-18.32	0.8	155.19	146.49	2.17	0	4.89	122	68.6	307	360	10.5	2.98	8.7	18.47	-1.26	-2.85	4.92	54.7	1	1	3	0
AaC	Pure water	Pure methanol	80% B isocratic elution	1.01617	1.33	-0.74	2.2	-2.42	-0.49	-6.79	-1.36	0.01	-1.73	29.24	2.6	2	2	0	14	219	1.11e+22	-369670	-14.85	0.86	210.7	216.51	2.34	0	2.51	108	-19	154	-31.5	2.67	3.95	5.78	12.59	0.02	-2.83	2.59	54.7	2	3	3	0
IQx	Pure water	Pure methanol	80% B isocratic elution	1.09793	1.58	-0.92	0.96	-2.02	-0.98	-6.86	-1.36	0	-2.4	29.24	0.6	1	4	0	15	246	1.11e+23	-414479	-25.04	0.93	218.25	227.81	2.36	0.01	8.8	141	56.1	274	235	9.64	3.08	5.71	14.84	-2.23	-2.75	8.88	69.6	2	3	5	0
8-MeIQx	Pure water	Pure methanol	80% B isocratic elution	1.1121	1.54	-1.06	0.92	-2.19	-1	-7.51	-1.36	0	-2.3	29.24	1	1	4	0	16	271	1.11e+26	-439162	-25.13	0.98	237.6	249.06	2.4	0.01	7.72	142	63.8	281	265	10.06	2.97	5.88	15.22	-1.59	-1.95	7.78	69.6	2	3	5	0
MeIQ	Pure water	Pure methanol	80% B isocratic elution	1.24287	1.65	-0.94	1.35	-2.44	-0.72	-7.59	-1.36	0.01	-1.87	29.24	2	1	3	0	16	270	1.11e+27	-429091	-21.18	0.93	236.91	253.92	2.4	0	9.17	124	38.5	216	166	7.22	2.74	7.22	16.13	0.27	-4.33	9.28	56.7	2	3	4	0
IQ[4,5-b]	Pure water	Pure methanol	80% B isocratic elution	1.08364	1.49	-0.99	0.7	-2.13	-0.97	-7.11	-1.36	0	-2.43	29.24	1.7	1	3	0	15	245	1.11e+24	-404413	-27.45	0.9	223.43	232.81	2.37	0	10.84	139	39.2	269	182	8.87	4.02	6.83	16.69	-0.82	-4.58	11	56.7	2	3	4	0
Harman	Pure water	Pure methanol	80% B isocratic elution	1.38243	1.9	-0.43	2.69	-2.49	-0.42	-7	-1.36	0.01	-1.52	29.24	3.6	1	1	0	14	216	1.11e+23	-359587	-12.73	0.59	214.44	223.28	2.35	0	4.55	81.6	10	132	63.3	3.7	2.33	7.72	16.34	1.94	-4.95	4.58	28.7	2	3	2	0
IQ	Pure water	Pure methanol	80% B isocratic elution	1.33649	1.76	-0.85	1.43	-2.34	-0.71	-7.1	-1.36	0	-1.95	29.24	1.5	1	3	0	15	245	1.11e+24	-404413	-20.86	0.92	222.22	233.02	2.37	0	8.83	123	32.7	213	148	6.9	2.78	7	15.75	-0.15	-2.69	8.95	56.7	2	3	4	0
Norharman	Pure water	Pure methanol	80% B isocratic elution	1.32271	1.81	-0.47	2.73	-2.32	-0.47	-6.39	-1.36	0.01	-1.72	29.24	3.2	1	1	0	13	193	1.11e+20	-334905	-13.23	0.56	196.55	201.82	2.3	0	4.61	85.1	3.38	142	46.2	3.74	2.88	7.61	16.32	1.37	-4.84	4.64	28.7	2	3	2	0
DMIP	Pure water	Pure methanol	80% B isocratic elution	1.29517	1.73	-0.83	1.51	-1.12	-1.01	-6.16	-0.59	0	-2.82	29.24	1	1	3	0	12	172	1.11e+21	-332645	-25.27	0.81	195.56	198.01	2.3	0.01	9.99	128	57.4	269	243	9.75	3.19	7.16	17.5	-1.15	-4.24	10.15	56.7	2	2	4	0
Phe-p-1	Pure water	Pure methanol	80% B isocratic elution	1.37901	1.83	-0.46	2.74	-2.2	-0.4	-6.79	-1.16	0.01	-1.66	29.24	2.3	1	2	1	13	152	1.11e+22	-335660	-12.87	0.73	209.56	213.73	2.33	0	3.22	91.3	4.88	123	51	3.16	1.78	7	14.9	1.32	-6	3.7	38.9	1	2	2	0
7,8-DiMeIQx	Pure water	Pure methanol	80% B isocratic elution	1.21152	1.66	-1.17	0.84	-2.35	-1	-8.08	-1.36	0	-2.19	29.24	1.4	1	4	0	17	297	1.11e+29	-463843	-25.35	1.03	254.55	269.67	2.43	0.01	6.62	143	68.9	284	281	10.44	2.87	6.01	15.48	-1.09	-4.51	6.74	69.6	2	3	5	0
Sarcosine	Pure water	Pure methanol	80% B isocratic elution	-0.24192	-0.47	-0.21	4.28	0.6	-0.89	-3.82	1.14	0	-3.06	29.24	-2.8	2	3	2	6	52.8	1110000000000	-203238	-12.38	0.78	127.98	113.01	2.05	0	2.92	94.2	17.5	201	42.4	4.57	4.19	4.37	24.65	-2.74	-4.93	8.22	49.3	0	0	1	0
Creatinine	Pure water	Pure methanol	80% B isocratic elution	0.825357	1.16	-0.34	1.29	0.23	-1.29	-4.4	0.18	0	-3.86	29.24	-1.8	1	1	0	8	151	111000000000000	-248681	-30.05	0.8	143.83	134.46	2.13	0	11.98	146	74.4	333	274	12.86	4.35	5.11	15.98	-5.3	-5.49	12.08	58.7	1	1	3	0
L-dihydroorotic acid	Pure water	Pure methanol	80% B isocratic elution	-1.78312	-1.63	-0.51	1.72	-0.4	-1.39	-4.77	-0.01	0	-3.46	29.24	-1.5	3	4	1	11	225	1.11e+16	-379565	-23.86	1.38	167.39	163.4	2.21	0.01	5.18	172	-17.2	327	-144	5.51	8.7	2.35	17.25	-6.68	-4.92	4.87	95.5	1	1	2	0
L-Carnosine	Pure water	Pure methanol	80% B isocratic elution	-0.0209078	0.29	-1.29	-0.26	-0.56	-2.03	-7.68	0.18	0	-4.07	29.24	-4	4	5	6	16	259	1.11e+29	-499765	-38.44	1.62	256.29	270.05	2.43	0	12.99	233	51	527	223	14.27	9.82	9.18	20.43	-2.61	-2.2	9.07	121	1	1	4	0
Betaine	Pure water	Pure methanol	80% B isocratic elution	0.733489	1.03	-0.94	-0.47	1.61	-1.81	-4.74	1.14	0	-5.11	29.24	0.5	0	2	1	8	87.6	1.11e+18	-252565	-41.59	0.81	153.39	154.86	2.19	0	15.35	178	181	468	789	21.46	0.08	1.63	14.25	-9.97	-2.66	15.47	40.1	0	0	1	0
Cytosine	Pure water	Pure methanol	80% B isocratic elution	0.643847	0.96	0.16	0.33	-0.33	-1.61	-4.17	-0.01	0	-3.99	29.24	-1.7	2	2	0	8	170	1110000000000	-247927	-34.38	0.87	136.73	126.12	2.1	0	12.89	167	25.9	432	122	12.95	9.67	6.77	18.33	-4	-2.61	13.02	67.5	1	1	3	0
Hypoxanthine	Pure water	Pure methanol	80% B isocratic elution	-0.00814154	-0.11	-0.11	1.31	-0.8	-1.27	-4.52	-0.59	0	-3.44	29.24	-0.5	2	3	0	10	190	11100000000000	-305849	-25.27	0.97	150.2	143.93	2.16	0.01	2.51	159	5.76	351	-26.8	8.83	8.14	3.33	11.33	-6.92	-2.86	2.6	70.1	2	2	4	0
Xanthine	Pure water	Pure methanol	80% B isocratic elution	-0.642535	-1.04	-0.29	1.37	-1	-1.25	-4.77	-0.59	0	-3.24	29.24	-0.7	3	3	0	11	217	111000000000000	-353097	-23.72	1.25	159.89	153.96	2.19	0.01	6.06	170	-15.1	367	-128	7.64	10.2	7.74	22.93	-2.99	-2.73	6.1	86.9	2	2	4	0
Guanine	Pure water	Pure methanol	80% B isocratic elution	0.102561	-0.08	-0.19	0.35	-1.01	-1.59	-4.93	-0.59	0	-3.68	29.24	-1.1	3	3	0	11	225	1110000000000000	-340610	-30.43	1.22	164.42	158.81	2.2	0.01	3.28	191	-7.34	441	-50.1	10.78	11.63	4.81	13.86	-5.99	-2.81	3.34	96.2	2	2	5	0
Adenine	Pure water	Pure methanol	80% B isocratic elution	0.741207	1.05	-0.36	0.65	-1.04	-1.37	-4.68	-0.59	0	-3.36	29.24	-0.1	2	4	0	10	127	111000000000000	-293365	-30.51	0.99	153.88	148.09	2.17	0	11.17	161	9.31	380	47.5	10.2	8.73	5.5	15	-4.52	-2.45	11.33	80.5	2	2	5	0
Cytidine	Pure water	Pure methanol	80% B isocratic elution	-0.658589	-0.64	-1.27	-2.05	-2.05	-1.99	-7.18	-0.97	0	-3.3	29.24	-2.1	4	5	2	17	383	1.11e+29	-559442	-33.42	1.74	241.37	261.47	2.42	0.01	6.86	228	40.6	467	146	13.35	9.24	15.82	45.67	-2.4	-3.46	9.4	129	1	2	3	0
Inosine	Pure water	Pure methanol	80% B isocratic elution	-1.34351	-1.19	-1.42	-1.34	-2.54	-2.03	-7.7	-1.55	0	-3.2	29.24	-1.3	4	7	2	19	405	1.11e+30	-617361	-37.38	1.8	261.27	285.84	2.46	0.01	9.42	243	21.5	459	3.18	11.36	10.23	10.31	29.87	-2.75	-2.08	9.18	129	2	3	4	0
Xanthosine	Pure water	Pure methanol	80% B isocratic elution	-1.14949	-1.03	-1.44	-1.92	-2.45	-1.98	-7.78	-1.55	0	-3.09	29.24	-2.4	5	7	2	20	434	1.11e+31	-664603	-37.75	1.91	265.99	291.82	2.47	0.01	15.45	240	28.5	439	14	11	9.33	12.24	32.43	-2.45	-3.34	12.18	146	2	3	4	0
Guanosine	Pure water	Pure methanol	80% B isocratic elution	-0.90592	-1.24	-1.62	-2.39	-2.86	-2.27	-8.14	-1.55	0	-3.31	29.24	-1.9	5	7	2	20	446	1.11e+32	-652123	-42.64	2.09	276.17	298.73	2.48	0.01	11.43	271	-5.63	543	-85.9	12.26	14.35	13.14	36.02	-2.86	-2.22	11.13	155	2	3	5	0
Uridine	Pure water	Pure methanol	80% B isocratic elution	-0.951729	-0.65	-1.23	-0.25	-1.77	-1.32	-6.97	-0.97	0	-2.77	29.24	-2	4	6	2	17	371	1.11e+28	-571934	-25.98	1.71	235.87	256.94	2.41	0.01	5.57	194	28.6	328	37.3	8.29	6.3	11.64	34.25	-0.98	-1.56	4.28	119	1	2	2	0
Adenosine	Pure water	Pure methanol	80% B isocratic elution	-0.0832438	-0.14	-1.38	0.66	-2.7	-1.22	-7.65	-1.55	0	-2.11	29.24	-1.1	4	8	2	19	335	1.11e+31	-604889	-23.66	1.73	253.58	283.19	2.45	0.01	2.18	191	36.3	322	107	8.99	5.54	14.19	39.95	-0.74	-3.53	3.84	140	2	3	5	0
D-Pantothenic acid	Pure water	Pure methanol	95% B isocratic elution	-0.969187	-1.02	-1.33	1.6	-0.46	-1.64	-7.54	1.14	0	-3.45	31.34	-1.1	4	5	6	15	239	1.11e+31	-492236	-26.02	1.56	247.96	269.32	2.43	0	7.46	186	7.26	354	-39.4	8.13	8.95	6.22	23.15	-1.05	-7.18	4.69	107	0	0	1	0
Niacinamide	Pure water	Pure methanol	95% B isocratic elution	0.404756	0.63	-0.34	3.02	-0.51	-0.73	-4.8	-0.01	0	-2.89	31.34	-0.4	1	2	1	9	114	111000000000000	-261773	-16.8	0.79	152.74	146.35	2.17	0	2.95	112	27.7	215	95.8	7.01	3.68	5.08	12.91	-3.24	-5.1	4.94	56	1	1	2	0
Pyridoxal	Pure water	Pure methanol	95% B isocratic elution	0.544606	0.76	-0.65	2.47	-1.2	-0.98	-5.81	-0.01	0	-2.51	31.34	0	2	4	2	12	162	1.11e+20	-370806	-16.87	1.08	190.02	193.09	2.29	0.01	3.53	121	8.31	226	-19.7	4.94	5.51	5.04	18.08	-1.4	-2.71	3.58	70.4	1	1	1	0
Pyridoxine	Pure water	Pure methanol	95% B isocratic elution	1.14674	1.51	-0.84	1.77	-1.28	-1.19	-5.97	-0.01	0	-2.78	31.34	-0.8	3	4	2	12	142	1.11e+22	-371565	-22.39	1.06	195.11	198.18	2.3	0	9.44	137	11.5	264	32	6.46	6.06	11.25	32	0.01	-3.22	2.9	73.6	1	1	1	0
Pyridoxamine	Pure water	Pure methanol	95% B isocratic elution	1.00572	1.41	-0.76	2.14	-1.21	-1.22	-6.13	-0.01	0	-2.73	31.34	-1	3	4	2	12	143	1.11e+23	-359090	-19.85	1.23	199.15	205.79	2.31	0.01	2.37	144	49.5	321	233	9.73	4.96	8.51	18.04	-0.23	-3.37	4.35	79.4	1	1	2	0
Thiamine	Pure water	Pure methanol	95% B isocratic elution	0.73626	1.34	0	0	-1.38	-1.18	-9.47	-0.97	0	-3.32	31.34	0	2	6	4	19	269	1.11e+34	-727954	-65.42	1.49	291.55	320.17	2.51	-0.99	0	200	-71.2	335	-70.9	6.56	7.95	14.5	36.27	1.75	-2.99	10.15	104	2	2	4	1
Nicotinic acid	Pure water	Pure methanol	95% B isocratic elution	0.0794755	-0.22	-0.27	3.56	-0.87	-0.76	-4.55	-0.01	0	-2.44	31.34	0.4	1	3	1	9	114	11100000000000	-274248	-12.08	0.77	149.15	142	2.15	0	0.88	92.9	1.16	177	-39.1	3.37	4.37	3.73	20.67	-2.73	-2.8	3.67	50.2	1	1	1	0
Alanine	Pure water	Pure methanol	95% B isocratic elution	-0.239107	-0.42	-0.23	3.79	0.58	-0.88	-3.68	1.14	0	-3.12	31.34	-3	2	3	1	6	61.8	1110000000000	-203245	-12.07	0.88	123.86	112.49	2.05	0	1.93	103	20.6	223	81.1	5.25	4.15	6.92	15.51	-0.69	-4.07	2.88	63.3	0	0	1	0
Leucine	Pure water	Pure methanol	95% B isocratic elution	0.234326	0.2	-0.4	3.98	-0.01	-0.77	-5.47	1.14	0	-2.69	31.34	-1.5	2	3	3	9	101	1.11e+21	-277279	-11.49	0.91	176.64	178.51	2.25	0	1.75	97.3	10	188	15.9	4.1	4.03	4.32	23.12	-1.46	-4.42	4.6	63.3	0	0	1	0
Isoleucine	Pure water	Pure methanol	95% B isocratic elution	0.240175	0.18	-0.41	3.99	-0.04	-0.75	-5.42	1.14	0	-2.65	31.34	-1.7	2	3	3	9	103	1.11e+21	-277278	-11.39	0.9	174.76	177.8	2.25	0	1.86	95.2	4.07	178	-13.2	3.66	4.06	5.29	24.73	-0.48	-4.81	8.21	63.3	0	0	1	0
Valine	Pure water	Pure methanol	95% B isocratic elution	0.1452	0	-0.35	3.48	0.83	-0.47	-4.8	1.14	0	-3.14	31.34	-2.3	2	3	2	8	90.4	1.11e+18	-252603	-16.64	0.58	154.87	154.22	2.19	0	7.95	86.9	30.2	126	74.6	3.87	1.16	5.48	13.49	-1.89	-5.23	8.12	63.3	0	0	1	0
Proline	Pure water	Pure methanol	95% B isocratic elution	0.268077	0.09	-0.33	3.62	-0.57	-0.8	-4.51	0.18	0	-2.65	31.34	-2.5	2	3	1	8	103	1.11e+16	-251835	-13.13	0.77	147.6	142.26	2.15	0	3.61	94.9	18	192	36.7	4.47	4	3.51	21.36	-3.35	-4.13	3.48	49.3	1	1	1	0
Phenylalanine	Pure water	Pure methanol	95% B isocratic elution	0.137421	-0.02	-0.67	2.97	-1	-0.84	-6.26	-0.01	0	-2.59	31.34	-1.5	2	3	3	12	153	1.11e+22	-348280	-15.74	1.01	200.74	208.03	2.32	0	2.66	122	9.49	216	30.8	4.48	4.38	4.16	22.91	-1.94	-2.63	7.78	63.3	0	1	1	0
Methionine	Pure water	Pure methanol	95% B isocratic elution	-0.187113	-0.63	-0.61	3.26	0.03	-0.88	-5.99	1.14	0	-3	31.34	-1.9	2	4	4	9	97	1.11e+19	-502501	-15.83	1.08	186.45	185.96	2.27	0.01	4.25	126	19.1	229	42.1	4.86	4.41	4.94	22.93	-1.51	-3.09	4.05	88.6	0	0	1	1
Tryptophan	Pure water	Pure methanol	95% B isocratic elution	-0.274724	-0.44	-1.08	1.74	-1.77	-1	-7.3	-0.59	0	-2.57	31.34	-1.1	3	3	3	15	245	1.11e+26	-430876	-21.02	1.24	233.33	250.05	2.4	0	5.34	153	-10.6	271	-20.2	4.73	6.7	4.11	22.25	-1.98	-4.08	5.74	79.1	1	2	2	0
Serine	Pure water	Pure methanol	95% B isocratic elution	-0.551896	-1.23	-0.33	2.82	0.58	-0.92	-3.85	1.14	0	-3.24	31.34	-3.1	3	4	2	7	72.6	11100000000000	-250467	-14.94	1.06	132.32	122.02	2.09	0	3.06	118	4.07	216	-33.2	4.49	4.85	3.58	19.55	-4.08	-3.26	0.99	83.6	0	0	1	0
Glutamine	Pure water	Pure methanol	95% B isocratic elution	-0.532109	-0.96	-0.53	1.53	0.57	-1.38	-5.36	1.14	0	-3.92	31.34	-3.1	3	4	4	10	146	1.11e+19	-333835	-24.89	1.35	180.5	176.05	2.25	0	6.95	174	25	351	64	9.61	7.18	5.6	22.19	-3.61	-5.52	7.53	106	0	0	2	0
Threonine	Pure water	Pure methanol	95% B isocratic elution	-0.307244	-0.8	-0.45	3.49	0.26	-0.94	-4.43	1.14	0	-3	31.34	-2.9	3	4	2	8	93.3	1.11e+16	-275147	-14.56	1.14	149.43	144.38	2.16	0.01	4	119	6.4	228	-10.9	5.24	4.98	2.45	17.53	-4.59	-5.42	3.68	83.6	0	0	1	0
Histidine	Pure water	Pure methanol	95% B isocratic elution	0.20129	0.34	-0.44	1.3	0.21	-1.02	-5.48	0.18	0	-3.85	31.34	-3.2	3	4	3	11	151	1.11e+19	-344509	-27.47	0.98	180.91	181.77	2.26	0	5.04	160	36.7	296	139	8.38	4.38	5.7	14.6	-3.9	-4.52	8.26	92	1	1	3	0
Citrulline	Pure water	Pure methanol	95% B isocratic elution	-0.691213	-1.42	-0.79	1.3	0.47	-1.66	-6.44	1.14	0	-4.23	31.34	-4.3	4	4	5	12	171	1.11e+24	-393268	-29.64	1.53	214.73	215.15	2.33	0	7.6	204	40.5	433	151	12.42	8.36	5.05	24.14	-4.38	-3.03	2.31	118	0	0	3	0
Taurine	Pure water	Pure methanol	95% B isocratic elution	-0.933735	-0.85	-0.39	3.08	0.72	-1.11	-4.15	1.14	0	-3.63	31.34	-4.1	2	4	2	7	120	11100000000000	-476406	-18.56	1.09	143.51	133.49	2.13	0.01	3.57	138	-7.89	285	-71.8	4.16	6.16	-2.47	10.55	-10.36	-3.86	3.47	88.8	0	0	1	1
Tyrosine	Pure water	Pure methanol	95% B isocratic elution	0.375234	0.74	-0.96	2.22	-1.14	-1.31	-6.4	-0.01	0	-2.98	31.34	-2.3	3	4	3	13	176	1.11e+23	-395507	-20.45	1.27	210.41	219.03	2.34	0	4.34	158	-11.2	301	-58.2	5.35	7.81	4.18	23.28	-2.58	-2.6	8.84	83.6	0	1	1	0
Hypotaurine	Pure water	Pure methanol	95% B isocratic elution	-0.690381	-1.04	-0.22	3.16	0.71	-1.06	-4.23	1.14	0	-3.61	31.34	-1.5	2	4	2	6	55.5	1110000000000	-429187	-19.14	0.95	136.46	125.99	2.1	0	5.56	129	43.8	272	164	8.05	3.84	8.34	19	-1.9	-2.55	5.19	82.5	0	0	1	1
L-Hydroxyproline	Pure water	Pure methanol	95% B isocratic elution	-0.230654	-0.55	-0.43	2.82	-0.44	-1.27	-4.62	0.18	0	-3.22	31.34	-3.3	3	4	1	9	125	1.11e+17	-299059	-18.75	1.12	155.95	154.27	2.19	0	3.05	140	34.4	301	118	8.1	5.75	7.9	18.5	-1.19	-2.19	3.72	69.6	1	1	1	0
N-omiga-acetylhistamine	Pure water	Pure methanol	95% B isocratic elution	1.26206	1.66	-0.69	2.28	-0.21	-1.11	-6.17	0.18	0	-3.57	31.34	-0.4	2	2	3	11	138	1.11e+21	-321960	-23.57	0.83	195.51	194.44	2.29	0	4.66	148	58.4	320	214	11.2	4.88	6.06	14.64	-2.8	-2.61	4.77	57.8	1	1	3	0
Tyramine	Pure water	Pure methanol	95% B isocratic elution	0.47367	1.16	-0.53	3.22	-1.06	-0.84	-5.83	-0.01	0	-2.54	31.34	1.1	2	2	2	10	87.3	1.11e+20	-277120	-13.98	0.82	183.62	181.83	2.26	0	2.6	106	27.2	227	168	5.88	3.52	8.82	18.57	0.95	-2.63	3.17	46.2	0	1	1	0
Histamine	Pure water	Pure methanol	95% B isocratic elution	0.376962	-0.06	-0.5	2.94	-0.2	-0.95	-4.89	0.18	0	-3.22	31.34	-0.7	2	2	2	8	64.7	1.11e+16	-226118	-18.32	0.8	155.19	146.49	2.17	0	4.89	122	68.6	307	360	10.5	2.98	8.7	18.47	-1.26	-2.85	4.92	54.7	1	1	3	0
AaC	Pure water	Pure methanol	95% B isocratic elution	0.999071	1.28	-0.76	2.2	-2.6	-0.46	-6.83	-1.36	0.01	-1.75	31.34	2.6	2	2	0	14	219	1.11e+22	-369670	-14.85	0.86	210.7	216.51	2.34	0	2.51	108	-19	154	-31.5	2.67	3.95	5.78	12.59	0.02	-2.83	2.59	54.7	2	3	3	0
IQx	Pure water	Pure methanol	95% B isocratic elution	1.07445	1.51	-0.84	0.96	-2.09	-0.9	-6.9	-1.36	0	-2.46	31.34	0.6	1	4	0	15	246	1.11e+23	-414479	-25.04	0.93	218.25	227.81	2.36	0.01	8.8	141	56.1	274	235	9.64	3.08	5.71	14.84	-2.23	-2.75	8.88	69.6	2	3	5	0
8-MeIQx	Pure water	Pure methanol	95% B isocratic elution	1.1018	1.51	-1	0.92	-2.29	-0.91	-7.55	-1.36	0	-2.35	31.34	1	1	4	0	16	271	1.11e+26	-439162	-25.13	0.98	237.6	249.06	2.4	0.01	7.72	142	63.8	281	265	10.06	2.97	5.88	15.22	-1.59	-1.95	7.78	69.6	2	3	5	0
MeIQ	Pure water	Pure methanol	95% B isocratic elution	1.21907	1.57	-0.93	1.35	-2.6	-0.66	-7.63	-1.36	0.01	-1.9	31.34	2	1	3	0	16	270	1.11e+27	-429091	-21.18	0.93	236.91	253.92	2.4	0	9.17	124	38.5	216	166	7.22	2.74	7.22	16.13	0.27	-4.33	9.28	56.7	2	3	4	0
IQ[4,5-b]	Pure water	Pure methanol	95% B isocratic elution	1.08369	1.44	-0.91	0.7	-2.21	-0.89	-7.15	-1.36	0	-2.49	31.34	1.7	1	3	0	15	245	1.11e+24	-404413	-27.45	0.9	223.43	232.81	2.37	0	10.84	139	39.2	269	182	8.87	4.02	6.83	16.69	-0.82	-4.58	11	56.7	2	3	4	0
Harman	Pure water	Pure methanol	95% B isocratic elution	1.36508	1.81	-0.48	2.69	-2.7	-0.38	-7.04	-1.36	0.01	-1.52	31.34	3.6	1	1	0	14	216	1.11e+23	-359587	-12.73	0.59	214.44	223.28	2.35	0	4.55	81.6	10	132	63.3	3.7	2.33	7.72	16.34	1.94	-4.95	4.58	28.7	2	3	2	0
IQ	Pure water	Pure methanol	95% B isocratic elution	1.3119	1.78	-0.83	1.43	-2.48	-0.65	-7.14	-1.36	0	-1.98	31.34	1.5	1	3	0	15	245	1.11e+24	-404413	-20.86	0.92	222.22	233.02	2.37	0	8.83	123	32.7	213	148	6.9	2.78	7	15.75	-0.15	-2.69	8.95	56.7	2	3	4	0
Norharman	Pure water	Pure methanol	95% B isocratic elution	1.31945	1.74	-0.5	2.73	-2.49	-0.44	-6.43	-1.36	0.01	-1.73	31.34	3.2	1	1	0	13	193	1.11e+20	-334905	-13.23	0.56	196.55	201.82	2.3	0	4.61	85.1	3.38	142	46.2	3.74	2.88	7.61	16.32	1.37	-4.84	4.64	28.7	2	3	2	0
DMIP	Pure water	Pure methanol	95% B isocratic elution	1.28574	1.73	-0.75	1.51	-1.16	-0.93	-6.2	-0.59	0	-2.88	31.34	1	1	3	0	12	172	1.11e+21	-332645	-25.27	0.81	195.56	198.01	2.3	0.01	9.99	128	57.4	269	243	9.75	3.19	7.16	17.5	-1.15	-4.24	10.15	56.7	2	2	4	0
Phe-p-1	Pure water	Pure methanol	95% B isocratic elution	1.36441	1.79	-0.51	2.74	-2.4	-0.37	-6.83	-1.16	0.01	-1.66	31.34	2.3	1	2	1	13	152	1.11e+22	-335660	-12.87	0.73	209.56	213.73	2.33	0	3.22	91.3	4.88	123	51	3.16	1.78	7	14.9	1.32	-6	3.7	38.9	1	2	2	0
7,8-DiMeIQx	Pure water	Pure methanol	95% B isocratic elution	1.2077	1.66	-1.12	0.84	-2.48	-0.92	-8.13	-1.36	0	-2.23	31.34	1.4	1	4	0	17	297	1.11e+29	-463843	-25.35	1.03	254.55	269.67	2.43	0.01	6.62	143	68.9	284	281	10.44	2.87	6.01	15.48	-1.09	-4.51	6.74	69.6	2	3	5	0
Sarcosine	Pure water	Pure methanol	95% B isocratic elution	-0.239585	-0.43	-0.21	4.28	0.56	-0.83	-3.85	1.14	0	-3.08	31.34	-2.8	2	3	2	6	52.8	1110000000000	-203238	-12.38	0.78	127.98	113.01	2.05	0	2.92	94.2	17.5	201	42.4	4.57	4.19	4.37	24.65	-2.74	-4.93	8.22	49.3	0	0	1	0
Creatinine	Pure water	Pure methanol	95% B isocratic elution	0.803354	1.11	-0.16	1.29	0.35	-1.19	-4.42	0.18	0	-3.96	31.34	-1.8	1	1	0	8	151	111000000000000	-248681	-30.05	0.8	143.83	134.46	2.13	0	11.98	146	74.4	333	274	12.86	4.35	5.11	15.98	-5.3	-5.49	12.08	58.7	1	1	3	0
Betaine	Pure water	Pure methanol	95% B isocratic elution	0.729073	1.02	-0.65	-0.47	1.84	-1.67	-4.77	1.14	0	-5.26	31.34	0.5	0	2	1	8	87.6	1.11e+18	-252565	-41.59	0.81	153.39	154.86	2.19	0	15.35	178	181	468	789	21.46	0.08	1.63	14.25	-9.97	-2.66	15.47	40.1	0	0	1	0
Cytosine	Pure water	Pure methanol	95% B isocratic elution	0.635918	0.98	0.37	0.33	-0.18	-1.5	-4.19	-0.01	0	-4.11	31.34	-1.7	2	2	0	8	170	1110000000000	-247927	-34.38	0.87	136.73	126.12	2.1	0	12.89	167	25.9	432	122	12.95	9.67	6.77	18.33	-4	-2.61	13.02	67.5	1	1	3	0
Hypoxanthine	Pure water	Pure methanol	95% B isocratic elution	-0.00462441	-0.08	0.05	1.31	-0.71	-1.17	-4.55	-0.59	0	-3.53	31.34	-0.5	2	3	0	10	190	11100000000000	-305849	-25.27	0.97	150.2	143.93	2.16	0.01	2.51	159	5.76	351	-26.8	8.83	8.14	3.33	11.33	-6.92	-2.86	2.6	70.1	2	2	4	0
Xanthine	Pure water	Pure methanol	95% B isocratic elution	-0.633418	-0.98	-0.15	1.37	-0.94	-1.16	-4.8	-0.59	0	-3.33	31.34	-0.7	3	3	0	11	217	111000000000000	-353097	-23.72	1.25	159.89	153.96	2.19	0.01	6.06	170	-15.1	367	-128	7.64	10.2	7.74	22.93	-2.99	-2.73	6.1	86.9	2	2	4	0
Guanine	Pure water	Pure methanol	95% B isocratic elution	0.10144	-0.03	0.01	0.35	-0.9	-1.48	-4.96	-0.59	0	-3.79	31.34	-1.1	3	3	0	11	225	1110000000000000	-340610	-30.43	1.22	164.42	158.81	2.2	0.01	3.28	191	-7.34	441	-50.1	10.78	11.63	4.81	13.86	-5.99	-2.81	3.34	96.2	2	2	5	0
Adenine	Pure water	Pure methanol	95% B isocratic elution	0.707442	0.98	-0.19	0.65	-0.96	-1.27	-4.71	-0.59	0	-3.45	31.34	-0.1	2	4	0	10	127	111000000000000	-293365	-30.51	0.99	153.88	148.09	2.17	0	11.17	161	9.31	380	47.5	10.2	8.73	5.5	15	-4.52	-2.45	11.33	80.5	2	2	5	0
Cytidine	Pure water	Pure methanol	95% B isocratic elution	-0.646806	-0.49	-1.09	-2.05	-2.02	-1.86	-7.23	-0.97	0	-3.4	31.34	-2.1	4	5	2	17	383	1.11e+29	-559442	-33.42	1.74	241.37	261.47	2.42	0.01	6.86	228	40.6	467	146	13.35	9.24	15.82	45.67	-2.4	-3.46	9.4	129	1	2	3	0
Inosine	Pure water	Pure methanol	95% B isocratic elution	-1.3521	-1.42	-1.22	-1.34	-2.52	-1.9	-7.76	-1.55	0	-3.31	31.34	-1.3	4	7	2	19	405	1.11e+30	-617361	-37.38	1.8	261.27	285.84	2.46	0.01	9.42	243	21.5	459	3.18	11.36	10.23	10.31	29.87	-2.75	-2.08	9.18	129	2	3	4	0
Xanthosine	Pure water	Pure methanol	95% B isocratic elution	-1.15812	-1.12	-1.26	-1.92	-2.45	-1.85	-7.84	-1.55	0	-3.2	31.34	-2.4	5	7	2	20	434	1.11e+31	-664603	-37.75	1.91	265.99	291.82	2.47	0.01	15.45	240	28.5	439	14	11	9.33	12.24	32.43	-2.45	-3.34	12.18	146	2	3	4	0
Guanosine	Pure water	Pure methanol	95% B isocratic elution	-0.893657	-1.13	-1.39	-2.39	-2.82	-2.12	-8.2	-1.55	0	-3.43	31.34	-1.9	5	7	2	20	446	1.11e+32	-652123	-42.64	2.09	276.17	298.73	2.48	0.01	11.43	271	-5.63	543	-85.9	12.26	14.35	13.14	36.02	-2.86	-2.22	11.13	155	2	3	5	0
Uridine	Pure water	Pure methanol	95% B isocratic elution	-0.967932	-0.97	-1.14	-0.25	-1.84	-1.23	-7.03	-0.97	0	-2.83	31.34	-2	4	6	2	17	371	1.11e+28	-571934	-25.98	1.71	235.87	256.94	2.41	0.01	5.57	194	28.6	328	37.3	8.29	6.3	11.64	34.25	-0.98	-1.56	4.28	119	1	2	2	0
Adenosine	Pure water	Pure methanol	95% B isocratic elution	-0.0783781	-0.06	-1.31	0.66	-2.81	-1.13	-7.71	-1.55	0	-2.17	31.34	-1.1	4	8	2	19	335	1.11e+31	-604889	-23.66	1.73	253.58	283.19	2.45	0.01	2.18	191	36.3	322	107	8.99	5.54	14.19	39.95	-0.74	-3.53	3.84	140	2	3	5	0
D-Pantothenic acid	0.1% formic acid water	0.1% formic acid methanol	5% B isocratic elution	-0.895275	-0.73	-0.09	1.6	1.29	-2.7	-6.79	1.14	0	-3.82	18.74	-1.1	4	5	6	15	239	1.11e+31	-492236	-26.02	1.56	247.96	269.32	2.43	0	7.46	186	7.26	354	-39.4	8.13	8.95	6.22	23.15	-1.05	-7.18	4.69	107	0	0	1	0
Niacinamide	0.1% formic acid water	0.1% formic acid methanol	5% B isocratic elution	0.427885	0.19	0.26	3.02	0.25	-1.35	-4.4	-0.01	0	-2.98	18.74	-0.4	1	2	1	9	114	111000000000000	-261773	-16.8	0.79	152.74	146.35	2.17	0	2.95	112	27.7	215	95.8	7.01	3.68	5.08	12.91	-3.24	-5.1	4.94	56	1	1	2	0
Pyridoxal	0.1% formic acid water	0.1% formic acid methanol	5% B isocratic elution	0.531011	0.13	0.89	2.47	0.7	-1.63	-5.16	-0.01	0	-3.01	18.74	0	2	4	2	12	162	1.11e+20	-370806	-16.87	1.08	190.02	193.09	2.29	0.01	3.53	121	8.31	226	-19.7	4.94	5.51	5.04	18.08	-1.4	-2.71	3.58	70.4	1	1	1	0
Pyridoxine	0.1% formic acid water	0.1% formic acid methanol	5% B isocratic elution	0.987458	0.7	0.3	1.77	0.21	-1.94	-5.34	-0.01	0	-3.1	18.74	-0.8	3	4	2	12	142	1.11e+22	-371565	-22.39	1.06	195.11	198.18	2.3	0	9.44	137	11.5	264	32	6.46	6.06	11.25	32	0.01	-3.22	2.9	73.6	1	1	1	0
Pyridoxamine	0.1% formic acid water	0.1% formic acid methanol	5% B isocratic elution	0.812507	0.4	0.41	2.14	0.28	-2.06	-5.53	-0.01	0	-3.07	18.74	-1	3	4	2	12	143	1.11e+23	-359090	-19.85	1.23	199.15	205.79	2.31	0.01	2.37	144	49.5	321	233	9.73	4.96	8.51	18.04	-0.23	-3.37	4.35	79.4	1	1	2	0
Thiamine	0.1% formic acid water	0.1% formic acid methanol	5% B isocratic elution	0.575749	0.2	0	0	0.45	-1.95	-8.68	-0.97	0	-3.95	18.74	0	2	6	4	19	269	1.11e+34	-727954	-65.42	1.49	291.55	320.17	2.51	-0.99	0	200	-71.2	335	-70.9	6.56	7.95	14.5	36.27	1.75	-2.99	10.15	104	2	2	4	1
Nicotinic acid	0.1% formic acid water	0.1% formic acid methanol	5% B isocratic elution	0.259871	0.2	1.1	3.56	0.73	-1.23	-4.01	-0.01	0	-2.86	18.74	0.4	1	3	1	9	114	11100000000000	-274248	-12.08	0.77	149.15	142	2.15	0	0.88	92.9	1.16	177	-39.1	3.37	4.37	3.73	20.67	-2.73	-2.8	3.67	50.2	1	1	1	0
Alanine	0.1% formic acid water	0.1% formic acid methanol	5% B isocratic elution	-0.141473	-0.31	0.61	3.79	1.39	-1.45	-3.28	1.14	0	-3.31	18.74	-3	2	3	1	6	61.8	1110000000000	-203245	-12.07	0.88	123.86	112.49	2.05	0	1.93	103	20.6	223	81.1	5.25	4.15	6.92	15.51	-0.69	-4.07	2.88	63.3	0	0	1	0
Leucine	0.1% formic acid water	0.1% formic acid methanol	5% B isocratic elution	0.322132	0.12	1.54	3.98	2.19	-1.28	-4.98	1.14	0	-3.37	18.74	-1.5	2	3	3	9	101	1.11e+21	-277279	-11.49	0.91	176.64	178.51	2.25	0	1.75	97.3	10	188	15.9	4.1	4.03	4.32	23.12	-1.46	-4.42	4.6	63.3	0	0	1	0
Isoleucine	0.1% formic acid water	0.1% formic acid methanol	5% B isocratic elution	0.316882	0.09	1.53	3.99	2.17	-1.24	-4.93	1.14	0	-3.33	18.74	-1.7	2	3	3	9	103	1.11e+21	-277278	-11.39	0.9	174.76	177.8	2.25	0	1.86	95.2	4.07	178	-13.2	3.66	4.06	5.29	24.73	-0.48	-4.81	8.21	63.3	0	0	1	0
Valine	0.1% formic acid water	0.1% formic acid methanol	5% B isocratic elution	0.217066	-0.03	0.76	3.48	2.07	-0.91	-4.4	1.14	0	-3.45	18.74	-2.3	2	3	2	8	90.4	1.11e+18	-252603	-16.64	0.58	154.87	154.22	2.19	0	7.95	86.9	30.2	126	74.6	3.87	1.16	5.48	13.49	-1.89	-5.23	8.12	63.3	0	0	1	0
Proline	0.1% formic acid water	0.1% formic acid methanol	5% B isocratic elution	0.343098	0.22	0.86	3.62	0.74	-1.34	-4.07	0.18	0	-2.99	18.74	-2.5	2	3	1	8	103	1.11e+16	-251835	-13.13	0.77	147.6	142.26	2.15	0	3.61	94.9	18	192	36.7	4.47	4	3.51	21.36	-3.35	-4.13	3.48	49.3	1	1	1	0
Phenylalanine	0.1% formic acid water	0.1% formic acid methanol	5% B isocratic elution	0.210445	0	0.96	2.97	1.09	-1.37	-5.64	-0.01	0	-3.13	18.74	-1.5	2	3	3	12	153	1.11e+22	-348280	-15.74	1.01	200.74	208.03	2.32	0	2.66	122	9.49	216	30.8	4.48	4.38	4.16	22.91	-1.94	-2.63	7.78	63.3	0	1	1	0
Methionine	0.1% formic acid water	0.1% formic acid methanol	5% B isocratic elution	-0.0450872	-0.15	0.86	3.26	1.8	-1.47	-5.39	1.14	0	-3.47	18.74	-1.9	2	4	4	9	97	1.11e+19	-502501	-15.83	1.08	186.45	185.96	2.27	0.01	4.25	126	19.1	229	42.1	4.86	4.41	4.94	22.93	-1.51	-3.09	4.05	88.6	0	0	1	1
Tryptophan	0.1% formic acid water	0.1% formic acid methanol	5% B isocratic elution	-0.181069	-0.39	0.43	1.74	0.45	-1.58	-6.61	-0.59	0	-3.06	18.74	-1.1	3	3	3	15	245	1.11e+26	-430876	-21.02	1.24	233.33	250.05	2.4	0	5.34	153	-10.6	271	-20.2	4.73	6.7	4.11	22.25	-1.98	-4.08	5.74	79.1	1	2	2	0
Serine	0.1% formic acid water	0.1% formic acid methanol	5% B isocratic elution	-0.434769	-0.38	0.37	2.82	1.27	-1.51	-3.4	1.14	0	-3.36	18.74	-3.1	3	4	2	7	72.6	11100000000000	-250467	-14.94	1.06	132.32	122.02	2.09	0	3.06	118	4.07	216	-33.2	4.49	4.85	3.58	19.55	-4.08	-3.26	0.99	83.6	0	0	1	0
Glutamine	0.1% formic acid water	0.1% formic acid methanol	5% B isocratic elution	-0.474696	-0.38	-0.44	1.53	0.79	-2.35	-4.86	1.14	0	-3.79	18.74	-3.1	3	4	4	10	146	1.11e+19	-333835	-24.89	1.35	180.5	176.05	2.25	0	6.95	174	25	351	64	9.61	7.18	5.6	22.19	-3.61	-5.52	7.53	106	0	0	2	0
Threonine	0.1% formic acid water	0.1% formic acid methanol	5% B isocratic elution	-0.278276	-0.31	0.7	3.49	1.49	-1.57	-3.93	1.14	0	-3.33	18.74	-2.9	3	4	2	8	93.3	1.11e+16	-275147	-14.56	1.14	149.43	144.38	2.16	0.01	4	119	6.4	228	-10.9	5.24	4.98	2.45	17.53	-4.59	-5.42	3.68	83.6	0	0	1	0
Cysteine	0.1% formic acid water	0.1% formic acid methanol	5% B isocratic elution	-0.676594	-0.57	0.72	3.62	1.43	-1.14	-4.26	1.14	0	-3.18	18.74	-2.5	3	4	2	7	75.3	11100000000000	-453148	-13.45	1	147.18	141.36	2.15	0.01	3.06	108	-15.6	173	-97.6	1.79	4.69	5.27	20.11	-1.25	-3.34	5	64.3	0	0	1	1
Asparagine	0.1% formic acid water	0.1% formic acid methanol	5% B isocratic elution	-0.581004	-0.45	-0.64	2.07	0.53	-2.37	-4.22	1.14	0	-3.81	18.74	-3.4	3	4	3	9	134	1.11e+16	-309157	-24.85	1.33	160.84	155.26	2.19	0	3.88	177	14.7	352	34.5	9.05	7.57	3.77	19.29	-6.05	-4.96	6.4	106	0	0	2	0
Glutamicacid	0.1% formic acid water	0.1% formic acid methanol	5% B isocratic elution	-0.531812	-0.38	-0.26	2.12	1.3	-1.8	-4.49	1.14	0	-3.84	18.74	-3.7	3	5	4	10	145	1.11e+18	-346311	-25.1	1.06	172.73	167.41	2.22	0	8.05	150	9.3	247	-26.7	4.8	5.32	4.16	20.54	-4.48	-4.16	4.84	101	0	0	1	1
Lysine	0.1% formic acid water	0.1% formic acid methanol	5% B isocratic elution	-0.00236385	-0.41	0.19	2.83	1.88	-1.54	-5.45	1.14	0	-3.76	18.74	-3	3	4	5	10	106	1.11e+23	-312026	-21.17	0.86	191.1	191.01	2.28	0	5.99	127	75.3	255	325	8.64	1.15	8.95	18.74	-1	-1.73	0.96	89.3	0	0	2	0
Arginine	0.1% formic acid water	0.1% formic acid methanol	5% B isocratic elution	0.38151	-0.13	-0.69	1.47	1.06	-2.13	-6.08	1.14	0	-3.87	18.74	-4.2	4	4	5	12	176	1.11e+25	-380778	-28.48	1.38	214.93	214.24	2.33	0	9.11	182	56.4	339	241	10.62	3.9	10.66	22.26	-2.7	-2.93	1.97	128	0	0	4	0
Histidine	0.1% formic acid water	0.1% formic acid methanol	5% B isocratic elution	0.230605	-0.16	-0.71	1.3	0.22	-1.84	-4.99	0.18	0	-3.56	18.74	-3.2	3	4	3	11	151	1.11e+19	-344509	-27.47	0.98	180.91	181.77	2.26	0	5.04	160	36.7	296	139	8.38	4.38	5.7	14.6	-3.9	-4.52	8.26	92	1	1	3	0
Citrulline	0.1% formic acid water	0.1% formic acid methanol	5% B isocratic elution	-0.585314	-0.51	-0.79	1.3	0.74	-2.82	-5.87	1.14	0	-4.05	18.74	-4.3	4	4	5	12	171	1.11e+24	-393268	-29.64	1.53	214.73	215.15	2.33	0	7.6	204	40.5	433	151	12.42	8.36	5.05	24.14	-4.38	-3.03	2.31	118	0	0	3	0
Taurine	0.1% formic acid water	0.1% formic acid methanol	5% B isocratic elution	-0.961464	-0.84	-0.08	3.08	1.15	-1.73	-3.64	1.14	0	-3.6	18.74	-4.1	2	4	2	7	120	11100000000000	-476406	-18.56	1.09	143.51	133.49	2.13	0.01	3.57	138	-7.89	285	-71.8	4.16	6.16	-2.47	10.55	-10.36	-3.86	3.47	88.8	0	0	1	1
Tyrosine	0.1% formic acid water	0.1% formic acid methanol	5% B isocratic elution	0.282556	0.03	0.16	2.22	0.47	-2.06	-5.71	-0.01	0	-3.3	18.74	-2.3	3	4	3	13	176	1.11e+23	-395507	-20.45	1.27	210.41	219.03	2.34	0	4.34	158	-11.2	301	-58.2	5.35	7.81	4.18	23.28	-2.58	-2.6	8.84	83.6	0	1	1	0
Hypotaurine	0.1% formic acid water	0.1% formic acid methanol	5% B isocratic elution	-0.686621	-0.53	-0.13	3.16	0.77	-1.82	-3.8	1.14	0	-3.47	18.74	-1.5	2	4	2	6	55.5	1110000000000	-429187	-19.14	0.95	136.46	125.99	2.1	0	5.56	129	43.8	272	164	8.05	3.84	8.34	19	-1.9	-2.55	5.19	82.5	0	0	1	1
L-Hydroxyproline	0.1% formic acid water	0.1% formic acid methanol	5% B isocratic elution	-0.20864	-0.16	-0.01	2.82	0.08	-2.1	-4.12	0.18	0	-3.23	18.74	-3.3	3	4	1	9	125	1.11e+17	-299059	-18.75	1.12	155.95	154.27	2.19	0	3.05	140	34.4	301	118	8.1	5.75	7.9	18.5	-1.19	-2.19	3.72	69.6	1	1	1	0
N-omiga-acetylhistamine	0.1% formic acid water	0.1% formic acid methanol	5% B isocratic elution	1.06803	0.78	-0.37	2.28	0.45	-1.97	-5.69	0.18	0	-3.54	18.74	-0.4	2	2	3	11	138	1.11e+21	-321960	-23.57	0.83	195.51	194.44	2.29	0	4.66	148	58.4	320	214	11.2	4.88	6.06	14.64	-2.8	-2.61	4.77	57.8	1	1	3	0
L-pyroglutamic acid	0.1% formic acid water	0.1% formic acid methanol	5% B isocratic elution	-0.657967	-0.65	-0.15	2.43	0.17	-1.85	-3.98	0.18	0	-3.31	18.74	-0.8	2	3	1	9	154	1110000000000000	-298326	-20.95	0.96	151.34	146.44	2.17	0	7.17	137	11.3	267	-26.3	6.36	6.48	3.66	21.17	-4.87	-2.3	6.22	66.4	1	1	1	0
Tyramine	0.1% formic acid water	0.1% formic acid methanol	5% B isocratic elution	0.331821	-0.14	1.07	3.22	0.89	-1.34	-5.33	-0.01	0	-3.06	18.74	1.1	2	2	2	10	87.3	1.11e+20	-277120	-13.98	0.82	183.62	181.83	2.26	0	2.6	106	27.2	227	168	5.88	3.52	8.82	18.57	0.95	-2.63	3.17	46.2	0	1	1	0
Histamine	0.1% formic acid water	0.1% formic acid methanol	5% B isocratic elution	0.284567	0.57	-0.07	2.94	0.39	-1.64	-4.52	0.18	0	-3.23	18.74	-0.7	2	2	2	8	64.7	1.11e+16	-226118	-18.32	0.8	155.19	146.49	2.17	0	4.89	122	68.6	307	360	10.5	2.98	8.7	18.47	-1.26	-2.85	4.92	54.7	1	1	3	0
IQx	0.1% formic acid water	0.1% formic acid methanol	5% B isocratic elution	0.586164	0.35	0.06	0.96	-0.6	-1.65	-6.32	-1.36	0	-2.68	18.74	0.6	1	4	0	15	246	1.11e+23	-414479	-25.04	0.93	218.25	227.81	2.36	0.01	8.8	141	56.1	274	235	9.64	3.08	5.71	14.84	-2.23	-2.75	8.88	69.6	2	3	5	0
8-MeIQx	0.1% formic acid water	0.1% formic acid methanol	5% B isocratic elution	0.496317	-1.32	0.25	0.92	-0.37	-1.68	-6.93	-1.36	0	-2.72	18.74	1	1	4	0	16	271	1.11e+26	-439162	-25.13	0.98	237.6	249.06	2.4	0.01	7.72	142	63.8	281	265	10.06	2.97	5.88	15.22	-1.59	-1.95	7.78	69.6	2	3	5	0
MeIQ	0.1% formic acid water	0.1% formic acid methanol	5% B isocratic elution	0.75652	0.64	0.84	1.35	-0.15	-1.26	-7.01	-1.36	0	-2.5	18.74	2	1	3	0	16	270	1.11e+27	-429091	-21.18	0.93	236.91	253.92	2.4	0	9.17	124	38.5	216	166	7.22	2.74	7.22	16.13	0.27	-4.33	9.28	56.7	2	3	4	0
IQ	0.1% formic acid water	0.1% formic acid methanol	5% B isocratic elution	0.830356	0.81	0.7	1.43	-0.34	-1.23	-6.55	-1.36	0	-2.47	18.74	1.5	1	3	0	15	245	1.11e+24	-404413	-20.86	0.92	222.22	233.02	2.37	0	8.83	123	32.7	213	148	6.9	2.78	7	15.75	-0.15	-2.69	8.95	56.7	2	3	4	0
DMIP	0.1% formic acid water	0.1% formic acid methanol	5% B isocratic elution	0.954222	0.83	-0.01	1.51	0.03	-1.64	-5.7	-0.59	0	-3.03	18.74	1	1	3	0	12	172	1.11e+21	-332645	-25.27	0.81	195.56	198.01	2.3	0.01	9.99	128	57.4	269	243	9.75	3.19	7.16	17.5	-1.15	-4.24	10.15	56.7	2	2	4	0
Sarcosine	0.1% formic acid water	0.1% formic acid methanol	5% B isocratic elution	-0.140005	-0.3	0.78	4.28	1.53	-1.36	-3.42	1.14	0	-3.34	18.74	-2.8	2	3	2	6	52.8	1110000000000	-203238	-12.38	0.78	127.98	113.01	2.05	0	2.92	94.2	17.5	201	42.4	4.57	4.19	4.37	24.65	-2.74	-4.93	8.22	49.3	0	0	1	0
Creatinine	0.1% formic acid water	0.1% formic acid methanol	5% B isocratic elution	0.85957	0.26	-0.93	1.29	-0.34	-2.09	-4.1	0.18	0	-3.46	18.74	-1.8	1	1	0	8	151	111000000000000	-248681	-30.05	0.8	143.83	134.46	2.13	0	11.98	146	74.4	333	274	12.86	4.35	5.11	15.98	-5.3	-5.49	12.08	58.7	1	1	3	0
L-dihydroorotic acid	0.1% formic acid water	0.1% formic acid methanol	5% B isocratic elution	-1.69626	-1.44	-0.45	1.72	-0.25	-2.16	-4.21	-0.01	0	-3.34	18.74	-1.5	3	4	1	11	225	1.11e+16	-379565	-23.86	1.38	167.39	163.4	2.21	0.01	5.18	172	-17.2	327	-144	5.51	8.7	2.35	17.25	-6.68	-4.92	4.87	95.5	1	1	2	0
L-Carnosine	0.1% formic acid water	0.1% formic acid methanol	5% B isocratic elution	-0.0591353	-0.8	-1.25	-0.26	-0.1	-3.18	-6.99	0.18	0	-3.94	18.74	-4	4	5	6	16	259	1.11e+29	-499765	-38.44	1.62	256.29	270.05	2.43	0	12.99	233	51	527	223	14.27	9.82	9.18	20.43	-2.61	-2.2	9.07	121	1	1	4	0
Betaine	0.1% formic acid water	0.1% formic acid methanol	5% B isocratic elution	0.723589	0.49	-2.42	-0.47	0.28	-2.8	-4.41	1.14	0	-4.33	18.74	0.5	0	2	1	8	87.6	1.11e+18	-252565	-41.59	0.81	153.39	154.86	2.19	0	15.35	178	181	468	789	21.46	0.08	1.63	14.25	-9.97	-2.66	15.47	40.1	0	0	1	0
Cytosine	0.1% formic acid water	0.1% formic acid methanol	5% B isocratic elution	0.779044	0.3	-0.82	0.33	-1.14	-2.46	-3.89	-0.01	0	-3.41	18.74	-1.7	2	2	0	8	170	1110000000000	-247927	-34.38	0.87	136.73	126.12	2.1	0	12.89	167	25.9	432	122	12.95	9.67	6.77	18.33	-4	-2.61	13.02	67.5	1	1	3	0
Hypoxanthine	0.1% formic acid water	0.1% formic acid methanol	5% B isocratic elution	0.020379	0	-0.65	1.31	-1.16	-2.05	-4.14	-0.59	0	-3.06	18.74	-0.5	2	3	0	10	190	11100000000000	-305849	-25.27	0.97	150.2	143.93	2.16	0.01	2.51	159	5.76	351	-26.8	8.83	8.14	3.33	11.33	-6.92	-2.86	2.6	70.1	2	2	4	0
Xanthine	0.1% formic acid water	0.1% formic acid methanol	5% B isocratic elution	-0.564315	-0.4	-0.53	1.37	-1.1	-2.05	-4.37	-0.59	0	-2.99	18.74	-0.7	3	3	0	11	217	111000000000000	-353097	-23.72	1.25	159.89	153.96	2.19	0.01	6.06	170	-15.1	367	-128	7.64	10.2	7.74	22.93	-2.99	-2.73	6.1	86.9	2	2	4	0
Guanine	0.1% formic acid water	0.1% formic acid methanol	5% B isocratic elution	0.206743	0.01	-1.02	0.35	-1.62	-2.52	-4.56	-0.59	0	-3.17	18.74	-1.1	3	3	0	11	225	1110000000000000	-340610	-30.43	1.22	164.42	158.81	2.2	0.01	3.28	191	-7.34	441	-50.1	10.78	11.63	4.81	13.86	-5.99	-2.81	3.34	96.2	2	2	5	0
Adenine	0.1% formic acid water	0.1% formic acid methanol	5% B isocratic elution	0.874669	0.55	-0.84	0.65	-1.29	-2.17	-4.34	-0.59	0	-3	18.74	-0.1	2	4	0	10	127	111000000000000	-293365	-30.51	0.99	153.88	148.09	2.17	0	11.17	161	9.31	380	47.5	10.2	8.73	5.5	15	-4.52	-2.45	11.33	80.5	2	2	5	0
Beta-Thymidine	0.1% formic acid water	0.1% formic acid methanol	5% B isocratic elution	-1.5225	-1.73	-0.03	1.16	-0.31	-2.17	-6.79	-0.97	0	-3.05	18.74	-1.2	3	5	2	17	381	1.11e+30	-549390	-24.52	1.42	246.36	266.66	2.43	0.01	4.01	176	50.1	310	96.6	9.28	5.39	15.53	45.1	-0.93	-3.96	6.43	99.1	1	2	2	0
Cytidine	0.1% formic acid water	0.1% formic acid methanol	5% B isocratic elution	-0.5755	-0.73	-1.13	-2.05	-1.54	-3.15	-6.51	-0.97	0	-3.21	18.74	-2.1	4	5	2	17	383	1.11e+29	-559442	-33.42	1.74	241.37	261.47	2.42	0.01	6.86	228	40.6	467	146	13.35	9.24	15.82	45.67	-2.4	-3.46	9.4	129	1	2	3	0
Inosine	0.1% formic acid water	0.1% formic acid methanol	5% B isocratic elution	-1.38713	-1.24	-1.35	-1.34	-1.98	-3.26	-6.93	-1.55	0	-3.09	18.74	-1.3	4	7	2	19	405	1.11e+30	-617361	-37.38	1.8	261.27	285.84	2.46	0.01	9.42	243	21.5	459	3.18	11.36	10.23	10.31	29.87	-2.75	-2.08	9.18	129	2	3	4	0
Xanthosine	0.1% formic acid water	0.1% formic acid methanol	5% B isocratic elution	-1.19968	-1.17	-1.16	-1.92	-1.7	-3.18	-6.96	-1.55	0	-3.07	18.74	-2.4	5	7	2	20	434	1.11e+31	-664603	-37.75	1.91	265.99	291.82	2.47	0.01	15.45	240	28.5	439	14	11	9.33	12.24	32.43	-2.45	-3.34	12.18	146	2	3	4	0
Guanosine	0.1% formic acid water	0.1% formic acid methanol	5% B isocratic elution	-0.826938	-0.65	-1.67	-2.39	-2.33	-3.56	-7.37	-1.55	0	-3.14	18.74	-1.9	5	7	2	20	446	1.11e+32	-652123	-42.64	2.09	276.17	298.73	2.48	0.01	11.43	271	-5.63	543	-85.9	12.26	14.35	13.14	36.02	-2.86	-2.22	11.13	155	2	3	5	0
Uridine	0.1% formic acid water	0.1% formic acid methanol	5% B isocratic elution	-1.09677	-1.79	-0.27	-0.25	-0.45	-2.21	-6.23	-0.97	0	-3.04	18.74	-2	4	6	2	17	371	1.11e+28	-571934	-25.98	1.71	235.87	256.94	2.41	0.01	5.57	194	28.6	328	37.3	8.29	6.3	11.64	34.25	-0.98	-1.56	4.28	119	1	2	2	0
Adenosine	0.1% formic acid water	0.1% formic acid methanol	5% B isocratic elution	0.0471135	0.05	-0.07	0.66	-0.9	-2.1	-6.97	-1.55	0	-2.53	18.74	-1.1	4	8	2	19	335	1.11e+31	-604889	-23.66	1.73	253.58	283.19	2.45	0.01	2.18	191	36.3	322	107	8.99	5.54	14.19	39.95	-0.74	-3.53	3.84	140	2	3	5	0
D-Pantothenic acid	0.1% formic acid water	0.1% formic acid methanol	20% B isocratic elution	-0.909776	-0.73	-0.98	1.6	0.55	-2.4	-7.07	1.14	0	-3.46	20.84	-1.1	4	5	6	15	239	1.11e+31	-492236	-26.02	1.56	247.96	269.32	2.43	0	7.46	186	7.26	354	-39.4	8.13	8.95	6.22	23.15	-1.05	-7.18	4.69	107	0	0	1	0
Niacinamide	0.1% formic acid water	0.1% formic acid methanol	20% B isocratic elution	0.421434	0.25	-0.22	3.02	-0.1	-1.18	-4.54	-0.01	0	-2.8	20.84	-0.4	1	2	1	9	114	111000000000000	-261773	-16.8	0.79	152.74	146.35	2.17	0	2.95	112	27.7	215	95.8	7.01	3.68	5.08	12.91	-3.24	-5.1	4.94	56	1	1	2	0
Pyridoxal	0.1% formic acid water	0.1% formic acid methanol	20% B isocratic elution	0.547364	0.26	0.03	2.47	-0.03	-1.45	-5.4	-0.01	0	-2.67	20.84	0	2	4	2	12	162	1.11e+20	-370806	-16.87	1.08	190.02	193.09	2.29	0.01	3.53	121	8.31	226	-19.7	4.94	5.51	5.04	18.08	-1.4	-2.71	3.58	70.4	1	1	1	0
Pyridoxine	0.1% formic acid water	0.1% formic acid methanol	20% B isocratic elution	1.04628	0.76	-0.43	1.77	-0.39	-1.73	-5.57	-0.01	0	-2.82	20.84	-0.8	3	4	2	12	142	1.11e+22	-371565	-22.39	1.06	195.11	198.18	2.3	0	9.44	137	11.5	264	32	6.46	6.06	11.25	32	0.01	-3.22	2.9	73.6	1	1	1	0
Pyridoxamine	0.1% formic acid water	0.1% formic acid methanol	20% B isocratic elution	0.867739	0.45	-0.35	2.14	-0.34	-1.84	-5.75	-0.01	0	-2.77	20.84	-1	3	4	2	12	143	1.11e+23	-359090	-19.85	1.23	199.15	205.79	2.31	0.01	2.37	144	49.5	321	233	9.73	4.96	8.51	18.04	-0.23	-3.37	4.35	79.4	1	1	2	0
Thiamine	0.1% formic acid water	0.1% formic acid methanol	20% B isocratic elution	0.603744	0.27	0	0	-0.23	-1.73	-8.96	-0.97	0	-3.5	20.84	0	2	6	4	19	269	1.11e+34	-727954	-65.42	1.49	291.55	320.17	2.51	-0.99	0	200	-71.2	335	-70.9	6.56	7.95	14.5	36.27	1.75	-2.99	10.15	104	2	2	4	1
Nicotinic acid	0.1% formic acid water	0.1% formic acid methanol	20% B isocratic elution	0.237099	0.25	0.38	3.56	0.11	-1.11	-4.21	-0.01	0	-2.58	20.84	0.4	1	3	1	9	114	11100000000000	-274248	-12.08	0.77	149.15	142	2.15	0	0.88	92.9	1.16	177	-39.1	3.37	4.37	3.73	20.67	-2.73	-2.8	3.67	50.2	1	1	1	0
Alanine	0.1% formic acid water	0.1% formic acid methanol	20% B isocratic elution	-0.149772	-0.21	0.1	3.79	1.03	-1.3	-3.42	1.14	0	-3.12	20.84	-3	2	3	1	6	61.8	1110000000000	-203245	-12.07	0.88	123.86	112.49	2.05	0	1.93	103	20.6	223	81.1	5.25	4.15	6.92	15.51	-0.69	-4.07	2.88	63.3	0	0	1	0
Leucine	0.1% formic acid water	0.1% formic acid methanol	20% B isocratic elution	0.319043	0.23	0.58	3.98	1.36	-1.14	-5.16	1.14	0	-2.98	20.84	-1.5	2	3	3	9	101	1.11e+21	-277279	-11.49	0.91	176.64	178.51	2.25	0	1.75	97.3	10	188	15.9	4.1	4.03	4.32	23.12	-1.46	-4.42	4.6	63.3	0	0	1	0
Isoleucine	0.1% formic acid water	0.1% formic acid methanol	20% B isocratic elution	0.320086	0.2	0.58	3.99	1.34	-1.1	-5.11	1.14	0	-2.95	20.84	-1.7	2	3	3	9	103	1.11e+21	-277278	-11.39	0.9	174.76	177.8	2.25	0	1.86	95.2	4.07	178	-13.2	3.66	4.06	5.29	24.73	-0.48	-4.81	8.21	63.3	0	0	1	0
Valine	0.1% formic acid water	0.1% formic acid methanol	20% B isocratic elution	0.18807	0.1	0.11	3.48	1.57	-0.79	-4.55	1.14	0	-3.2	20.84	-2.3	2	3	2	8	90.4	1.11e+18	-252603	-16.64	0.58	154.87	154.22	2.19	0	7.95	86.9	30.2	126	74.6	3.87	1.16	5.48	13.49	-1.89	-5.23	8.12	63.3	0	0	1	0
Proline	0.1% formic acid water	0.1% formic acid methanol	20% B isocratic elution	0.339011	0.3	0.19	3.62	0.22	-1.19	-4.23	0.18	0	-2.74	20.84	-2.5	2	3	1	8	103	1.11e+16	-251835	-13.13	0.77	147.6	142.26	2.15	0	3.61	94.9	18	192	36.7	4.47	4	3.51	21.36	-3.35	-4.13	3.48	49.3	1	1	1	0
Phenylalanine	0.1% formic acid water	0.1% formic acid methanol	20% B isocratic elution	0.193884	0.12	0.05	2.97	0.3	-1.22	-5.87	-0.01	0	-2.77	20.84	-1.5	2	3	3	12	153	1.11e+22	-348280	-15.74	1.01	200.74	208.03	2.32	0	2.66	122	9.49	216	30.8	4.48	4.38	4.16	22.91	-1.94	-2.63	7.78	63.3	0	1	1	0
Methionine	0.1% formic acid water	0.1% formic acid methanol	20% B isocratic elution	-0.0514606	-0.03	0.04	3.26	1.12	-1.3	-5.61	1.14	0	-3.15	20.84	-1.9	2	4	4	9	97	1.11e+19	-502501	-15.83	1.08	186.45	185.96	2.27	0.01	4.25	126	19.1	229	42.1	4.86	4.41	4.94	22.93	-1.51	-3.09	4.05	88.6	0	0	1	1
Tryptophan	0.1% formic acid water	0.1% formic acid methanol	20% B isocratic elution	-0.209471	-0.27	-0.5	1.74	-0.39	-1.42	-6.86	-0.59	0	-2.69	20.84	-1.1	3	3	3	15	245	1.11e+26	-430876	-21.02	1.24	233.33	250.05	2.4	0	5.34	153	-10.6	271	-20.2	4.73	6.7	4.11	22.25	-1.98	-4.08	5.74	79.1	1	2	2	0
Serine	0.1% formic acid water	0.1% formic acid methanol	20% B isocratic elution	-0.43819	-0.31	-0.1	2.82	0.95	-1.35	-3.57	1.14	0	-3.19	20.84	-3.1	3	4	2	7	72.6	11100000000000	-250467	-14.94	1.06	132.32	122.02	2.09	0	3.06	118	4.07	216	-33.2	4.49	4.85	3.58	19.55	-4.08	-3.26	0.99	83.6	0	0	1	0
Glutamine	0.1% formic acid water	0.1% formic acid methanol	20% B isocratic elution	-0.486429	-0.33	-0.83	1.53	0.57	-2.08	-5.04	1.14	0	-3.65	20.84	-3.1	3	4	4	10	146	1.11e+19	-333835	-24.89	1.35	180.5	176.05	2.25	0	6.95	174	25	351	64	9.61	7.18	5.6	22.19	-3.61	-5.52	7.53	106	0	0	2	0
Threonine	0.1% formic acid water	0.1% formic acid methanol	20% B isocratic elution	-0.27691	-0.22	0.05	3.49	0.99	-1.39	-4.11	1.14	0	-3.08	20.84	-2.9	3	4	2	8	93.3	1.11e+16	-275147	-14.56	1.14	149.43	144.38	2.16	0.01	4	119	6.4	228	-10.9	5.24	4.98	2.45	17.53	-4.59	-5.42	3.68	83.6	0	0	1	0
Cysteine	0.1% formic acid water	0.1% formic acid methanol	20% B isocratic elution	-0.692485	-0.48	0.07	3.62	0.9	-1.02	-4.45	1.14	0	-2.93	20.84	-2.5	3	4	2	7	75.3	11100000000000	-453148	-13.45	1	147.18	141.36	2.15	0.01	3.06	108	-15.6	173	-97.6	1.79	4.69	5.27	20.11	-1.25	-3.34	5	64.3	0	0	1	1
Asparagine	0.1% formic acid water	0.1% formic acid methanol	20% B isocratic elution	-0.581511	-0.39	-0.83	2.07	0.51	-2.11	-4.39	1.14	0	-3.76	20.84	-3.4	3	4	3	9	134	1.11e+16	-309157	-24.85	1.33	160.84	155.26	2.19	0	3.88	177	14.7	352	34.5	9.05	7.57	3.77	19.29	-6.05	-4.96	6.4	106	0	0	2	0
Glutamicacid	0.1% formic acid water	0.1% formic acid methanol	20% B isocratic elution	-0.581701	-0.29	-0.66	2.12	1.07	-1.59	-4.69	1.14	0	-3.71	20.84	-3.7	3	5	4	10	145	1.11e+18	-346311	-25.1	1.06	172.73	167.41	2.22	0	8.05	150	9.3	247	-26.7	4.8	5.32	4.16	20.54	-4.48	-4.16	4.84	101	0	0	1	1
Lysine	0.1% formic acid water	0.1% formic acid methanol	20% B isocratic elution	-0.011803	-0.3	-0.46	2.83	1.4	-1.35	-5.61	1.14	0	-3.51	20.84	-3	3	4	5	10	106	1.11e+23	-312026	-21.17	0.86	191.1	191.01	2.28	0	5.99	127	75.3	255	325	8.64	1.15	8.95	18.74	-1	-1.73	0.96	89.3	0	0	2	0
Arginine	0.1% formic acid water	0.1% formic acid methanol	20% B isocratic elution	0.415817	-0.01	-1.16	1.47	0.82	-1.86	-6.25	1.14	0	-3.7	20.84	-4.2	4	4	5	12	176	1.11e+25	-380778	-28.48	1.38	214.93	214.24	2.33	0	9.11	182	56.4	339	241	10.62	3.9	10.66	22.26	-2.7	-2.93	1.97	128	0	0	4	0
Histidine	0.1% formic acid water	0.1% formic acid methanol	20% B isocratic elution	0.242309	-0.06	-0.98	1.3	0.09	-1.62	-5.16	0.18	0	-3.47	20.84	-3.2	3	4	3	11	151	1.11e+19	-344509	-27.47	0.98	180.91	181.77	2.26	0	5.04	160	36.7	296	139	8.38	4.38	5.7	14.6	-3.9	-4.52	8.26	92	1	1	3	0
Citrulline	0.1% formic acid water	0.1% formic acid methanol	20% B isocratic elution	-0.587408	-0.44	-1.23	1.3	0.48	-2.51	-6.07	1.14	0	-3.9	20.84	-4.3	4	4	5	12	171	1.11e+24	-393268	-29.64	1.53	214.73	215.15	2.33	0	7.6	204	40.5	433	151	12.42	8.36	5.05	24.14	-4.38	-3.03	2.31	118	0	0	3	0
Taurine	0.1% formic acid water	0.1% formic acid methanol	20% B isocratic elution	-0.986162	-0.83	-0.45	3.08	0.92	-1.56	-3.82	1.14	0	-3.47	20.84	-4.1	2	4	2	7	120	11100000000000	-476406	-18.56	1.09	143.51	133.49	2.13	0.01	3.57	138	-7.89	285	-71.8	4.16	6.16	-2.47	10.55	-10.36	-3.86	3.47	88.8	0	0	1	1
Tyrosine	0.1% formic acid water	0.1% formic acid methanol	20% B isocratic elution	0.310582	0.08	-0.61	2.22	-0.18	-1.85	-5.96	-0.01	0	-3	20.84	-2.3	3	4	3	13	176	1.11e+23	-395507	-20.45	1.27	210.41	219.03	2.34	0	4.34	158	-11.2	301	-58.2	5.35	7.81	4.18	23.28	-2.58	-2.6	8.84	83.6	0	1	1	0
Hypotaurine	0.1% formic acid water	0.1% formic acid methanol	20% B isocratic elution	-0.711839	-0.47	-0.42	3.16	0.65	-1.61	-3.95	1.14	0	-3.38	20.84	-1.5	2	4	2	6	55.5	1110000000000	-429187	-19.14	0.95	136.46	125.99	2.1	0	5.56	129	43.8	272	164	8.05	3.84	8.34	19	-1.9	-2.55	5.19	82.5	0	0	1	1
L-Hydroxyproline	0.1% formic acid water	0.1% formic acid methanol	20% B isocratic elution	-0.21393	-0.08	-0.46	2.82	-0.22	-1.88	-4.3	0.18	0	-3.07	20.84	-3.3	3	4	1	9	125	1.11e+17	-299059	-18.75	1.12	155.95	154.27	2.19	0	3.05	140	34.4	301	118	8.1	5.75	7.9	18.5	-1.19	-2.19	3.72	69.6	1	1	1	0
N-omiga-acetylhistamine	0.1% formic acid water	0.1% formic acid methanol	20% B isocratic elution	1.15516	0.79	-0.87	2.28	0.07	-1.75	-5.86	0.18	0	-3.36	20.84	-0.4	2	2	3	11	138	1.11e+21	-321960	-23.57	0.83	195.51	194.44	2.29	0	4.66	148	58.4	320	214	11.2	4.88	6.06	14.64	-2.8	-2.61	4.77	57.8	1	1	3	0
L-pyroglutamic acid	0.1% formic acid water	0.1% formic acid methanol	20% B isocratic elution	-0.678641	-0.56	-0.51	2.43	-0.05	-1.65	-4.16	0.18	0	-3.19	20.84	-0.8	2	3	1	9	154	1110000000000000	-298326	-20.95	0.96	151.34	146.44	2.17	0	7.17	137	11.3	267	-26.3	6.36	6.48	3.66	21.17	-4.87	-2.3	6.22	66.4	1	1	1	0
Tyramine	0.1% formic acid water	0.1% formic acid methanol	20% B isocratic elution	0.340385	-0.07	0.21	3.22	0.15	-1.21	-5.51	-0.01	0	-2.72	20.84	1.1	2	2	2	10	87.3	1.11e+20	-277120	-13.98	0.82	183.62	181.83	2.26	0	2.6	106	27.2	227	168	5.88	3.52	8.82	18.57	0.95	-2.63	3.17	46.2	0	1	1	0
Histamine	0.1% formic acid water	0.1% formic acid methanol	20% B isocratic elution	0.307871	0.69	-0.51	2.94	0.07	-1.47	-4.65	0.18	0	-3.07	20.84	-0.7	2	2	2	8	64.7	1.11e+16	-226118	-18.32	0.8	155.19	146.49	2.17	0	4.89	122	68.6	307	360	10.5	2.98	8.7	18.47	-1.26	-2.85	4.92	54.7	1	1	3	0
AaC	0.1% formic acid water	0.1% formic acid methanol	20% B isocratic elution	0.770321	0.18	0.13	2.2	-0.97	-0.7	-6.48	-1.36	0	-2	20.84	2.6	2	2	0	14	219	1.11e+22	-369670	-14.85	0.86	210.7	216.51	2.34	0	2.51	108	-19	154	-31.5	2.67	3.95	5.78	12.59	0.02	-2.83	2.59	54.7	2	3	3	0
IQx	0.1% formic acid water	0.1% formic acid methanol	20% B isocratic elution	0.914715	0.69	-0.65	0.96	-1.21	-1.45	-6.52	-1.36	0	-2.41	20.84	0.6	1	4	0	15	246	1.11e+23	-414479	-25.04	0.93	218.25	227.81	2.36	0.01	8.8	141	56.1	274	235	9.64	3.08	5.71	14.84	-2.23	-2.75	8.88	69.6	2	3	5	0
8-MeIQx	0.1% formic acid water	0.1% formic acid methanol	20% B isocratic elution	0.863829	0.68	-0.61	0.92	-1.14	-1.48	-7.15	-1.36	0	-2.38	20.84	1	1	4	0	16	271	1.11e+26	-439162	-25.13	0.98	237.6	249.06	2.4	0.01	7.72	142	63.8	281	265	10.06	2.97	5.88	15.22	-1.59	-1.95	7.78	69.6	2	3	5	0
MeIQ	0.1% formic acid water	0.1% formic acid methanol	20% B isocratic elution	0.931847	0.72	-0.17	1.35	-1.05	-1.1	-7.23	-1.36	0	-2.09	20.84	2	1	3	0	16	270	1.11e+27	-429091	-21.18	0.93	236.91	253.92	2.4	0	9.17	124	38.5	216	166	7.22	2.74	7.22	16.13	0.27	-4.33	9.28	56.7	2	3	4	0
IQ[4,5-b]	0.1% formic acid water	0.1% formic acid methanol	20% B isocratic elution	0.948951	0.66	-0.68	0.7	-1.23	-1.39	-6.77	-1.36	0	-2.45	20.84	1.7	1	3	0	15	245	1.11e+24	-404413	-27.45	0.9	223.43	232.81	2.37	0	10.84	139	39.2	269	182	8.87	4.02	6.83	16.69	-0.82	-4.58	11	56.7	2	3	4	0
Harman	0.1% formic acid water	0.1% formic acid methanol	20% B isocratic elution	1.00473	0.92	0.73	2.69	-0.74	-0.6	-6.67	-1.36	0	-1.91	20.84	3.6	1	1	0	14	216	1.11e+23	-359587	-12.73	0.59	214.44	223.28	2.35	0	4.55	81.6	10	132	63.3	3.7	2.33	7.72	16.34	1.94	-4.95	4.58	28.7	2	3	2	0
IQ	0.1% formic acid water	0.1% formic acid methanol	20% B isocratic elution	1.05472	0.83	-0.2	1.43	-1.13	-1.07	-6.76	-1.36	0	-2.12	20.84	1.5	1	3	0	15	245	1.11e+24	-404413	-20.86	0.92	222.22	233.02	2.37	0	8.83	123	32.7	213	148	6.9	2.78	7	15.75	-0.15	-2.69	8.95	56.7	2	3	4	0
Norharman	0.1% formic acid water	0.1% formic acid methanol	20% B isocratic elution	0.977488	0.88	0.45	2.73	-0.87	-0.67	-6.08	-1.36	0	-2.01	20.84	3.2	1	1	0	13	193	1.11e+20	-334905	-13.23	0.56	196.55	201.82	2.3	0	4.61	85.1	3.38	142	46.2	3.74	2.88	7.61	16.32	1.37	-4.84	4.64	28.7	2	3	2	0
DMIP	0.1% formic acid water	0.1% formic acid methanol	20% B isocratic elution	1.09937	0.83	-0.64	1.51	-0.5	-1.46	-5.87	-0.59	0	-2.79	20.84	1	1	3	0	12	172	1.11e+21	-332645	-25.27	0.81	195.56	198.01	2.3	0.01	9.99	128	57.4	269	243	9.75	3.19	7.16	17.5	-1.15	-4.24	10.15	56.7	2	2	4	0
Phe-p-1	0.1% formic acid water	0.1% formic acid methanol	20% B isocratic elution	1.02295	0.97	0.6	2.74	-0.59	-0.59	-6.47	-1.16	0	-2	20.84	2.3	1	2	1	13	152	1.11e+22	-335660	-12.87	0.73	209.56	213.73	2.33	0	3.22	91.3	4.88	123	51	3.16	1.78	7	14.9	1.32	-6	3.7	38.9	1	2	2	0
7,8-DiMeIQx	0.1% formic acid water	0.1% formic acid methanol	20% B isocratic elution	0.927486	0.81	-0.55	0.84	-1.08	-1.49	-7.7	-1.36	0	-2.34	20.84	1.4	1	4	0	17	297	1.11e+29	-463843	-25.35	1.03	254.55	269.67	2.43	0.01	6.62	143	68.9	284	281	10.44	2.87	6.01	15.48	-1.09	-4.51	6.74	69.6	2	3	5	0
Sarcosine	0.1% formic acid water	0.1% formic acid methanol	20% B isocratic elution	-0.148472	-0.21	0.22	4.28	1.12	-1.22	-3.58	1.14	0	-3.13	20.84	-2.8	2	3	2	6	52.8	1110000000000	-203238	-12.38	0.78	127.98	113.01	2.05	0	2.92	94.2	17.5	201	42.4	4.57	4.19	4.37	24.65	-2.74	-4.93	8.22	49.3	0	0	1	0
Creatinine	0.1% formic acid water	0.1% formic acid methanol	20% B isocratic elution	0.858644	0.51	-0.99	1.29	-0.27	-1.86	-4.21	0.18	0	-3.46	20.84	-1.8	1	1	0	8	151	111000000000000	-248681	-30.05	0.8	143.83	134.46	2.13	0	11.98	146	74.4	333	274	12.86	4.35	5.11	15.98	-5.3	-5.49	12.08	58.7	1	1	3	0
L-dihydroorotic acid	0.1% formic acid water	0.1% formic acid methanol	20% B isocratic elution	-1.72408	-1.6	-0.76	1.72	-0.4	-1.92	-4.43	-0.01	0	-3.24	20.84	-1.5	3	4	1	11	225	1.11e+16	-379565	-23.86	1.38	167.39	163.4	2.21	0.01	5.18	172	-17.2	327	-144	5.51	8.7	2.35	17.25	-6.68	-4.92	4.87	95.5	1	1	2	0
L-Carnosine	0.1% formic acid water	0.1% formic acid methanol	20% B isocratic elution	-0.0340911	-0.4	-1.73	-0.26	-0.44	-2.84	-7.25	0.18	0	-3.77	20.84	-4	4	5	6	16	259	1.11e+29	-499765	-38.44	1.62	256.29	270.05	2.43	0	12.99	233	51	527	223	14.27	9.82	9.18	20.43	-2.61	-2.2	9.07	121	1	1	4	0
Betaine	0.1% formic acid water	0.1% formic acid methanol	20% B isocratic elution	0.701707	0.47	-2.23	-0.47	0.55	-2.53	-4.53	1.14	0	-4.44	20.84	0.5	0	2	1	8	87.6	1.11e+18	-252565	-41.59	0.81	153.39	154.86	2.19	0	15.35	178	181	468	789	21.46	0.08	1.63	14.25	-9.97	-2.66	15.47	40.1	0	0	1	0
Cytosine	0.1% formic acid water	0.1% formic acid methanol	20% B isocratic elution	0.74353	0.27	-0.75	0.33	-1.01	-2.22	-3.99	-0.01	0	-3.48	20.84	-1.7	2	2	0	8	170	1110000000000	-247927	-34.38	0.87	136.73	126.12	2.1	0	12.89	167	25.9	432	122	12.95	9.67	6.77	18.33	-4	-2.61	13.02	67.5	1	1	3	0
Hypoxanthine	0.1% formic acid water	0.1% formic acid methanol	20% B isocratic elution	0.0258125	0.08	-0.72	1.31	-1.14	-1.82	-4.28	-0.59	0	-3.06	20.84	-0.5	2	3	0	10	190	11100000000000	-305849	-25.27	0.97	150.2	143.93	2.16	0.01	2.51	159	5.76	351	-26.8	8.83	8.14	3.33	11.33	-6.92	-2.86	2.6	70.1	2	2	4	0
Xanthine	0.1% formic acid water	0.1% formic acid methanol	20% B isocratic elution	-0.540054	-0.34	-0.71	1.37	-1.16	-1.8	-4.52	-0.59	0	-2.94	20.84	-0.7	3	3	0	11	217	111000000000000	-353097	-23.72	1.25	159.89	153.96	2.19	0.01	6.06	170	-15.1	367	-128	7.64	10.2	7.74	22.93	-2.99	-2.73	6.1	86.9	2	2	4	0
Guanine	0.1% formic acid water	0.1% formic acid methanol	20% B isocratic elution	0.201113	0.02	-1.03	0.35	-1.53	-2.25	-4.69	-0.59	0	-3.2	20.84	-1.1	3	3	0	11	225	1110000000000000	-340610	-30.43	1.22	164.42	158.81	2.2	0.01	3.28	191	-7.34	441	-50.1	10.78	11.63	4.81	13.86	-5.99	-2.81	3.34	96.2	2	2	5	0
Adenine	0.1% formic acid water	0.1% formic acid methanol	20% B isocratic elution	0.870764	0.4	-0.94	0.65	-1.32	-1.93	-4.46	-0.59	0	-2.99	20.84	-0.1	2	4	0	10	127	111000000000000	-293365	-30.51	0.99	153.88	148.09	2.17	0	11.17	161	9.31	380	47.5	10.2	8.73	5.5	15	-4.52	-2.45	11.33	80.5	2	2	5	0
Beta-Thymidine	0.1% formic acid water	0.1% formic acid methanol	20% B isocratic elution	-1.55568	-1.78	-0.87	1.16	-0.99	-1.9	-7.06	-0.97	0	-2.72	20.84	-1.2	3	5	2	17	381	1.11e+30	-549390	-24.52	1.42	246.36	266.66	2.43	0.01	4.01	176	50.1	310	96.6	9.28	5.39	15.53	45.1	-0.93	-3.96	6.43	99.1	1	2	2	0
Cytidine	0.1% formic acid water	0.1% formic acid methanol	20% B isocratic elution	-0.58154	-0.81	-1.61	-2.05	-1.88	-2.8	-6.77	-0.97	0	-3.03	20.84	-2.1	4	5	2	17	383	1.11e+29	-559442	-33.42	1.74	241.37	261.47	2.42	0.01	6.86	228	40.6	467	146	13.35	9.24	15.82	45.67	-2.4	-3.46	9.4	129	1	2	3	0
Inosine	0.1% formic acid water	0.1% formic acid methanol	20% B isocratic elution	-1.30156	-1.28	-1.84	-1.34	-2.33	-2.88	-7.22	-1.55	0	-2.91	20.84	-1.3	4	7	2	19	405	1.11e+30	-617361	-37.38	1.8	261.27	285.84	2.46	0.01	9.42	243	21.5	459	3.18	11.36	10.23	10.31	29.87	-2.75	-2.08	9.18	129	2	3	4	0
Xanthosine	0.1% formic acid water	0.1% formic acid methanol	20% B isocratic elution	-1.12106	-1.22	-1.73	-1.92	-2.13	-2.81	-7.27	-1.55	0	-2.85	20.84	-2.4	5	7	2	20	434	1.11e+31	-664603	-37.75	1.91	265.99	291.82	2.47	0.01	15.45	240	28.5	439	14	11	9.33	12.24	32.43	-2.45	-3.34	12.18	146	2	3	4	0
Guanosine	0.1% formic acid water	0.1% formic acid methanol	20% B isocratic elution	-0.804268	-0.64	-2.14	-2.39	-2.69	-3.16	-7.67	-1.55	0	-2.96	20.84	-1.9	5	7	2	20	446	1.11e+32	-652123	-42.64	2.09	276.17	298.73	2.48	0.01	11.43	271	-5.63	543	-85.9	12.26	14.35	13.14	36.02	-2.86	-2.22	11.13	155	2	3	5	0
Uridine	0.1% formic acid water	0.1% formic acid methanol	20% B isocratic elution	-1.00661	-1.26	-1.01	-0.25	-1.04	-1.93	-6.52	-0.97	0	-2.75	20.84	-2	4	6	2	17	371	1.11e+28	-571934	-25.98	1.71	235.87	256.94	2.41	0.01	5.57	194	28.6	328	37.3	8.29	6.3	11.64	34.25	-0.98	-1.56	4.28	119	1	2	2	0
Adenosine	0.1% formic acid water	0.1% formic acid methanol	20% B isocratic elution	0.0444385	-0.07	-0.96	0.66	-1.65	-1.83	-7.23	-1.55	0	-2.18	20.84	-1.1	4	8	2	19	335	1.11e+31	-604889	-23.66	1.73	253.58	283.19	2.45	0.01	2.18	191	36.3	322	107	8.99	5.54	14.19	39.95	-0.74	-3.53	3.84	140	2	3	5	0
D-Pantothenic acid	0.1% formic acid water	0.1% formic acid methanol	35% B isocratic elution	-0.9276	-0.75	-1.33	1.6	0.15	-2.18	-7.23	1.14	0	-3.34	22.95	-1.1	4	5	6	15	239	1.11e+31	-492236	-26.02	1.56	247.96	269.32	2.43	0	7.46	186	7.26	354	-39.4	8.13	8.95	6.22	23.15	-1.05	-7.18	4.69	107	0	0	1	0
Niacinamide	0.1% formic acid water	0.1% formic acid methanol	35% B isocratic elution	0.425029	0.22	-0.4	3.02	-0.28	-1.05	-4.62	-0.01	0	-2.76	22.95	-0.4	1	2	1	9	114	111000000000000	-261773	-16.8	0.79	152.74	146.35	2.17	0	2.95	112	27.7	215	95.8	7.01	3.68	5.08	12.91	-3.24	-5.1	4.94	56	1	1	2	0
Pyridoxal	0.1% formic acid water	0.1% formic acid methanol	35% B isocratic elution	0.552016	0.17	-0.36	2.47	-0.46	-1.31	-5.54	-0.01	0	-2.54	22.95	0	2	4	2	12	162	1.11e+20	-370806	-16.87	1.08	190.02	193.09	2.29	0.01	3.53	121	8.31	226	-19.7	4.94	5.51	5.04	18.08	-1.4	-2.71	3.58	70.4	1	1	1	0
Pyridoxine	0.1% formic acid water	0.1% formic acid methanol	35% B isocratic elution	1.10721	0.77	-0.74	1.77	-0.73	-1.58	-5.71	-0.01	0	-2.71	22.95	-0.8	3	4	2	12	142	1.11e+22	-371565	-22.39	1.06	195.11	198.18	2.3	0	9.44	137	11.5	264	32	6.46	6.06	11.25	32	0.01	-3.22	2.9	73.6	1	1	1	0
Pyridoxamine	0.1% formic acid water	0.1% formic acid methanol	35% B isocratic elution	0.913539	0.51	-0.67	2.14	-0.69	-1.67	-5.88	-0.01	0	-2.67	22.95	-1	3	4	2	12	143	1.11e+23	-359090	-19.85	1.23	199.15	205.79	2.31	0.01	2.37	144	49.5	321	233	9.73	4.96	8.51	18.04	-0.23	-3.37	4.35	79.4	1	1	2	0
Thiamine	0.1% formic acid water	0.1% formic acid methanol	35% B isocratic elution	0.654783	0.37	0	0	-0.65	-1.58	-9.14	-0.97	0	-3.32	22.95	0	2	6	4	19	269	1.11e+34	-727954	-65.42	1.49	291.55	320.17	2.51	-0.99	0	200	-71.2	335	-70.9	6.56	7.95	14.5	36.27	1.75	-2.99	10.15	104	2	2	4	1
Nicotinic acid	0.1% formic acid water	0.1% formic acid methanol	35% B isocratic elution	0.186138	0.28	0.04	3.56	-0.25	-1.01	-4.33	-0.01	0	-2.47	22.95	0.4	1	3	1	9	114	11100000000000	-274248	-12.08	0.77	149.15	142	2.15	0	0.88	92.9	1.16	177	-39.1	3.37	4.37	3.73	20.67	-2.73	-2.8	3.67	50.2	1	1	1	0
Alanine	0.1% formic acid water	0.1% formic acid methanol	35% B isocratic elution	-0.18421	-0.19	-0.11	3.79	0.84	-1.18	-3.51	1.14	0	-3.06	22.95	-3	2	3	1	6	61.8	1110000000000	-203245	-12.07	0.88	123.86	112.49	2.05	0	1.93	103	20.6	223	81.1	5.25	4.15	6.92	15.51	-0.69	-4.07	2.88	63.3	0	0	1	0
Leucine	0.1% formic acid water	0.1% formic acid methanol	35% B isocratic elution	0.310903	0.28	0.1	3.98	0.87	-1.04	-5.27	1.14	0	-2.81	22.95	-1.5	2	3	3	9	101	1.11e+21	-277279	-11.49	0.91	176.64	178.51	2.25	0	1.75	97.3	10	188	15.9	4.1	4.03	4.32	23.12	-1.46	-4.42	4.6	63.3	0	0	1	0
Isoleucine	0.1% formic acid water	0.1% formic acid methanol	35% B isocratic elution	0.311699	0.26	0.11	3.99	0.85	-1	-5.22	1.14	0	-2.77	22.95	-1.7	2	3	3	9	103	1.11e+21	-277278	-11.39	0.9	174.76	177.8	2.25	0	1.86	95.2	4.07	178	-13.2	3.66	4.06	5.29	24.73	-0.48	-4.81	8.21	63.3	0	0	1	0
Valine	0.1% formic acid water	0.1% formic acid methanol	35% B isocratic elution	0.173348	0.14	-0.17	3.48	1.29	-0.7	-4.64	1.14	0	-3.11	22.95	-2.3	2	3	2	8	90.4	1.11e+18	-252603	-16.64	0.58	154.87	154.22	2.19	0	7.95	86.9	30.2	126	74.6	3.87	1.16	5.48	13.49	-1.89	-5.23	8.12	63.3	0	0	1	0
Proline	0.1% formic acid water	0.1% formic acid methanol	35% B isocratic elution	0.323239	0.33	-0.11	3.62	-0.08	-1.08	-4.33	0.18	0	-2.64	22.95	-2.5	2	3	1	8	103	1.11e+16	-251835	-13.13	0.77	147.6	142.26	2.15	0	3.61	94.9	18	192	36.7	4.47	4	3.51	21.36	-3.35	-4.13	3.48	49.3	1	1	1	0
Phenylalanine	0.1% formic acid water	0.1% formic acid methanol	35% B isocratic elution	0.176914	0.16	-0.36	2.97	-0.17	-1.11	-6	-0.01	0	-2.62	22.95	-1.5	2	3	3	12	153	1.11e+22	-348280	-15.74	1.01	200.74	208.03	2.32	0	2.66	122	9.49	216	30.8	4.48	4.38	4.16	22.91	-1.94	-2.63	7.78	63.3	0	1	1	0
Methionine	0.1% formic acid water	0.1% formic acid methanol	35% B isocratic elution	-0.0785704	-0.08	-0.34	3.26	0.72	-1.18	-5.74	1.14	0	-3.02	22.95	-1.9	2	4	4	9	97	1.11e+19	-502501	-15.83	1.08	186.45	185.96	2.27	0.01	4.25	126	19.1	229	42.1	4.86	4.41	4.94	22.93	-1.51	-3.09	4.05	88.6	0	0	1	1
Tryptophan	0.1% formic acid water	0.1% formic acid methanol	35% B isocratic elution	-0.223082	-0.23	-0.9	1.74	-0.89	-1.3	-7.01	-0.59	0	-2.55	22.95	-1.1	3	3	3	15	245	1.11e+26	-430876	-21.02	1.24	233.33	250.05	2.4	0	5.34	153	-10.6	271	-20.2	4.73	6.7	4.11	22.25	-1.98	-4.08	5.74	79.1	1	2	2	0
Serine	0.1% formic acid water	0.1% formic acid methanol	35% B isocratic elution	-0.47074	-0.3	-0.29	2.82	0.79	-1.22	-3.66	1.14	0	-3.14	22.95	-3.1	3	4	2	7	72.6	11100000000000	-250467	-14.94	1.06	132.32	122.02	2.09	0	3.06	118	4.07	216	-33.2	4.49	4.85	3.58	19.55	-4.08	-3.26	0.99	83.6	0	0	1	0
Glutamine	0.1% formic acid water	0.1% formic acid methanol	35% B isocratic elution	-0.491414	-0.32	-0.91	1.53	0.5	-1.88	-5.15	1.14	0	-3.65	22.95	-3.1	3	4	4	10	146	1.11e+19	-333835	-24.89	1.35	180.5	176.05	2.25	0	6.95	174	25	351	64	9.61	7.18	5.6	22.19	-3.61	-5.52	7.53	106	0	0	2	0
Threonine	0.1% formic acid water	0.1% formic acid methanol	35% B isocratic elution	-0.295155	-0.2	-0.25	3.49	0.71	-1.26	-4.22	1.14	0	-2.99	22.95	-2.9	3	4	2	8	93.3	1.11e+16	-275147	-14.56	1.14	149.43	144.38	2.16	0.01	4	119	6.4	228	-10.9	5.24	4.98	2.45	17.53	-4.59	-5.42	3.68	83.6	0	0	1	0
Cysteine	0.1% formic acid water	0.1% formic acid methanol	35% B isocratic elution	-0.729189	-0.45	-0.24	3.62	0.58	-0.93	-4.57	1.14	0	-2.83	22.95	-2.5	3	4	2	7	75.3	11100000000000	-453148	-13.45	1	147.18	141.36	2.15	0.01	3.06	108	-15.6	173	-97.6	1.79	4.69	5.27	20.11	-1.25	-3.34	5	64.3	0	0	1	1
Asparagine	0.1% formic acid water	0.1% formic acid methanol	35% B isocratic elution	-0.597278	-0.37	-0.79	2.07	0.56	-1.91	-4.49	1.14	0	-3.81	22.95	-3.4	3	4	3	9	134	1.11e+16	-309157	-24.85	1.33	160.84	155.26	2.19	0	3.88	177	14.7	352	34.5	9.05	7.57	3.77	19.29	-6.05	-4.96	6.4	106	0	0	2	0
Glutamicacid	0.1% formic acid water	0.1% formic acid methanol	35% B isocratic elution	-0.610784	-0.27	-0.75	2.12	0.97	-1.44	-4.82	1.14	0	-3.7	22.95	-3.7	3	5	4	10	145	1.11e+18	-346311	-25.1	1.06	172.73	167.41	2.22	0	8.05	150	9.3	247	-26.7	4.8	5.32	4.16	20.54	-4.48	-4.16	4.84	101	0	0	1	1
Lysine	0.1% formic acid water	0.1% formic acid methanol	35% B isocratic elution	-0.0145676	-0.26	-0.71	2.83	1.15	-1.2	-5.71	1.14	0	-3.43	22.95	-3	3	4	5	10	106	1.11e+23	-312026	-21.17	0.86	191.1	191.01	2.28	0	5.99	127	75.3	255	325	8.64	1.15	8.95	18.74	-1	-1.73	0.96	89.3	0	0	2	0
Arginine	0.1% formic acid water	0.1% formic acid methanol	35% B isocratic elution	0.42058	0.08	-1.26	1.47	0.72	-1.65	-6.36	1.14	0	-3.69	22.95	-4.2	4	4	5	12	176	1.11e+25	-380778	-28.48	1.38	214.93	214.24	2.33	0	9.11	182	56.4	339	241	10.62	3.9	10.66	22.26	-2.7	-2.93	1.97	128	0	0	4	0
Histidine	0.1% formic acid water	0.1% formic acid methanol	35% B isocratic elution	0.236175	-0.04	-0.97	1.3	0.07	-1.46	-5.27	0.18	0	-3.51	22.95	-3.2	3	4	3	11	151	1.11e+19	-344509	-27.47	0.98	180.91	181.77	2.26	0	5.04	160	36.7	296	139	8.38	4.38	5.7	14.6	-3.9	-4.52	8.26	92	1	1	3	0
Citrulline	0.1% formic acid water	0.1% formic acid methanol	35% B isocratic elution	-0.609594	-0.43	-1.3	1.3	0.38	-2.27	-6.19	1.14	0	-3.9	22.95	-4.3	4	4	5	12	171	1.11e+24	-393268	-29.64	1.53	214.73	215.15	2.33	0	7.6	204	40.5	433	151	12.42	8.36	5.05	24.14	-4.38	-3.03	2.31	118	0	0	3	0
Taurine	0.1% formic acid water	0.1% formic acid methanol	35% B isocratic elution	-0.994352	-0.81	-0.56	3.08	0.82	-1.43	-3.93	1.14	0	-3.45	22.95	-4.1	2	4	2	7	120	11100000000000	-476406	-18.56	1.09	143.51	133.49	2.13	0.01	3.57	138	-7.89	285	-71.8	4.16	6.16	-2.47	10.55	-10.36	-3.86	3.47	88.8	0	0	1	1
Tyrosine	0.1% formic acid water	0.1% formic acid methanol	35% B isocratic elution	0.338337	0.06	-0.91	2.22	-0.55	-1.7	-6.11	-0.01	0	-2.9	22.95	-2.3	3	4	3	13	176	1.11e+23	-395507	-20.45	1.27	210.41	219.03	2.34	0	4.34	158	-11.2	301	-58.2	5.35	7.81	4.18	23.28	-2.58	-2.6	8.84	83.6	0	1	1	0
Hypotaurine	0.1% formic acid water	0.1% formic acid methanol	35% B isocratic elution	-0.735258	-0.45	-0.48	3.16	0.61	-1.46	-4.05	1.14	0	-3.39	22.95	-1.5	2	4	2	6	55.5	1110000000000	-429187	-19.14	0.95	136.46	125.99	2.1	0	5.56	129	43.8	272	164	8.05	3.84	8.34	19	-1.9	-2.55	5.19	82.5	0	0	1	1
L-Hydroxyproline	0.1% formic acid water	0.1% formic acid methanol	35% B isocratic elution	-0.22285	-0.07	-0.6	2.82	-0.35	-1.71	-4.41	0.18	0	-3.04	22.95	-3.3	3	4	1	9	125	1.11e+17	-299059	-18.75	1.12	155.95	154.27	2.19	0	3.05	140	34.4	301	118	8.1	5.75	7.9	18.5	-1.19	-2.19	3.72	69.6	1	1	1	0
N-omiga-acetylhistamine	0.1% formic acid water	0.1% formic acid methanol	35% B isocratic elution	1.19569	0.88	-1.01	2.28	-0.1	-1.57	-5.96	0.18	0	-3.33	22.95	-0.4	2	2	3	11	138	1.11e+21	-321960	-23.57	0.83	195.51	194.44	2.29	0	4.66	148	58.4	320	214	11.2	4.88	6.06	14.64	-2.8	-2.61	4.77	57.8	1	1	3	0
L-pyroglutamic acid	0.1% formic acid water	0.1% formic acid methanol	35% B isocratic elution	-0.692735	-0.55	-0.59	2.43	-0.14	-1.5	-4.27	0.18	0	-3.19	22.95	-0.8	2	3	1	9	154	1110000000000000	-298326	-20.95	0.96	151.34	146.44	2.17	0	7.17	137	11.3	267	-26.3	6.36	6.48	3.66	21.17	-4.87	-2.3	6.22	66.4	1	1	1	0
Tyramine	0.1% formic acid water	0.1% formic acid methanol	35% B isocratic elution	0.362527	-0.09	-0.19	3.22	-0.29	-1.11	-5.62	-0.01	0	-2.58	22.95	1.1	2	2	2	10	87.3	1.11e+20	-277120	-13.98	0.82	183.62	181.83	2.26	0	2.6	106	27.2	227	168	5.88	3.52	8.82	18.57	0.95	-2.63	3.17	46.2	0	1	1	0
Histamine	0.1% formic acid water	0.1% formic acid methanol	35% B isocratic elution	0.325872	0.72	-0.65	2.94	-0.08	-1.33	-4.73	0.18	0	-3.04	22.95	-0.7	2	2	2	8	64.7	1.11e+16	-226118	-18.32	0.8	155.19	146.49	2.17	0	4.89	122	68.6	307	360	10.5	2.98	8.7	18.47	-1.26	-2.85	4.92	54.7	1	1	3	0
AaC	0.1% formic acid water	0.1% formic acid methanol	35% B isocratic elution	0.921901	0.63	-0.33	2.2	-1.53	-0.63	-6.6	-1.36	0.01	-1.83	22.95	2.6	2	2	0	14	219	1.11e+22	-369670	-14.85	0.86	210.7	216.51	2.34	0	2.51	108	-19	154	-31.5	2.67	3.95	5.78	12.59	0.02	-2.83	2.59	54.7	2	3	3	0
IQx	0.1% formic acid water	0.1% formic acid methanol	35% B isocratic elution	1.01728	0.64	-0.91	0.96	-1.56	-1.3	-6.65	-1.36	0	-2.32	22.95	0.6	1	4	0	15	246	1.11e+23	-414479	-25.04	0.93	218.25	227.81	2.36	0.01	8.8	141	56.1	274	235	9.64	3.08	5.71	14.84	-2.23	-2.75	8.88	69.6	2	3	5	0
8-MeIQx	0.1% formic acid water	0.1% formic acid methanol	35% B isocratic elution	0.986357	0.64	-0.95	0.92	-1.58	-1.32	-7.28	-1.36	0	-2.26	22.95	1	1	4	0	16	271	1.11e+26	-439162	-25.13	0.98	237.6	249.06	2.4	0.01	7.72	142	63.8	281	265	10.06	2.97	5.88	15.22	-1.59	-1.95	7.78	69.6	2	3	5	0
MeIQ	0.1% formic acid water	0.1% formic acid methanol	35% B isocratic elution	1.07513	0.79	-0.62	1.35	-1.6	-0.97	-7.37	-1.36	0.01	-1.93	22.95	2	1	3	0	16	270	1.11e+27	-429091	-21.18	0.93	236.91	253.92	2.4	0	9.17	124	38.5	216	166	7.22	2.74	7.22	16.13	0.27	-4.33	9.28	56.7	2	3	4	0
IQ[4,5-b]	0.1% formic acid water	0.1% formic acid methanol	35% B isocratic elution	0.99799	0.67	-0.96	0.7	-1.61	-1.26	-6.9	-1.36	0	-2.36	22.95	1.7	1	3	0	15	245	1.11e+24	-404413	-27.45	0.9	223.43	232.81	2.37	0	10.84	139	39.2	269	182	8.87	4.02	6.83	16.69	-0.82	-4.58	11	56.7	2	3	4	0
Harman	0.1% formic acid water	0.1% formic acid methanol	35% B isocratic elution	1.16127	0.87	0.16	2.69	-1.42	-0.54	-6.79	-1.36	0.01	-1.69	22.95	3.6	1	1	0	14	216	1.11e+23	-359587	-12.73	0.59	214.44	223.28	2.35	0	4.55	81.6	10	132	63.3	3.7	2.33	7.72	16.34	1.94	-4.95	4.58	28.7	2	3	2	0
IQ	0.1% formic acid water	0.1% formic acid methanol	35% B isocratic elution	1.16574	0.88	-0.59	1.43	-1.61	-0.95	-6.89	-1.36	0	-1.98	22.95	1.5	1	3	0	15	245	1.11e+24	-404413	-20.86	0.92	222.22	233.02	2.37	0	8.83	123	32.7	213	148	6.9	2.78	7	15.75	-0.15	-2.69	8.95	56.7	2	3	4	0
Norharman	0.1% formic acid water	0.1% formic acid methanol	35% B isocratic elution	1.13425	0.82	-0.02	2.73	-1.43	-0.61	-6.2	-1.36	0.01	-1.83	22.95	3.2	1	1	0	13	193	1.11e+20	-334905	-13.23	0.56	196.55	201.82	2.3	0	4.61	85.1	3.38	142	46.2	3.74	2.88	7.61	16.32	1.37	-4.84	4.64	28.7	2	3	2	0
DMIP	0.1% formic acid water	0.1% formic acid methanol	35% B isocratic elution	1.16874	0.81	-0.86	1.51	-0.78	-1.32	-5.98	-0.59	0	-2.72	22.95	1	1	3	0	12	172	1.11e+21	-332645	-25.27	0.81	195.56	198.01	2.3	0.01	9.99	128	57.4	269	243	9.75	3.19	7.16	17.5	-1.15	-4.24	10.15	56.7	2	2	4	0
Phe-p-1	0.1% formic acid water	0.1% formic acid methanol	35% B isocratic elution	1.17342	0.91	0.07	2.74	-1.21	-0.53	-6.6	-1.16	0.01	-1.81	22.95	2.3	1	2	1	13	152	1.11e+22	-335660	-12.87	0.73	209.56	213.73	2.33	0	3.22	91.3	4.88	123	51	3.16	1.78	7	14.9	1.32	-6	3.7	38.9	1	2	2	0
7,8-DiMeIQx	0.1% formic acid water	0.1% formic acid methanol	35% B isocratic elution	1.05994	0.76	-0.97	0.84	-1.61	-1.34	-7.84	-1.36	0	-2.19	22.95	1.4	1	4	0	17	297	1.11e+29	-463843	-25.35	1.03	254.55	269.67	2.43	0.01	6.62	143	68.9	284	281	10.44	2.87	6.01	15.48	-1.09	-4.51	6.74	69.6	2	3	5	0
Sarcosine	0.1% formic acid water	0.1% formic acid methanol	35% B isocratic elution	-0.188162	-0.19	-0.03	4.28	0.89	-1.11	-3.67	1.14	0	-3.05	22.95	-2.8	2	3	2	6	52.8	1110000000000	-203238	-12.38	0.78	127.98	113.01	2.05	0	2.92	94.2	17.5	201	42.4	4.57	4.19	4.37	24.65	-2.74	-4.93	8.22	49.3	0	0	1	0
Creatinine	0.1% formic acid water	0.1% formic acid methanol	35% B isocratic elution	0.857876	0.52	-0.87	1.29	-0.16	-1.68	-4.28	0.18	0	-3.54	22.95	-1.8	1	1	0	8	151	111000000000000	-248681	-30.05	0.8	143.83	134.46	2.13	0	11.98	146	74.4	333	274	12.86	4.35	5.11	15.98	-5.3	-5.49	12.08	58.7	1	1	3	0
L-dihydroorotic acid	0.1% formic acid water	0.1% formic acid methanol	35% B isocratic elution	-1.7354	-1.98	-0.79	1.72	-0.45	-1.74	-4.56	-0.01	0	-3.25	22.95	-1.5	3	4	1	11	225	1.11e+16	-379565	-23.86	1.38	167.39	163.4	2.21	0.01	5.18	172	-17.2	327	-144	5.51	8.7	2.35	17.25	-6.68	-4.92	4.87	95.5	1	1	2	0
L-Carnosine	0.1% formic acid water	0.1% formic acid methanol	35% B isocratic elution	-0.019004	-0.24	-1.78	-0.26	-0.57	-2.58	-7.41	0.18	0	-3.78	22.95	-4	4	5	6	16	259	1.11e+29	-499765	-38.44	1.62	256.29	270.05	2.43	0	12.99	233	51	527	223	14.27	9.82	9.18	20.43	-2.61	-2.2	9.07	121	1	1	4	0
Betaine	0.1% formic acid water	0.1% formic acid methanol	35% B isocratic elution	0.698303	0.61	-1.92	-0.47	0.83	-2.32	-4.61	1.14	0	-4.61	22.95	0.5	0	2	1	8	87.6	1.11e+18	-252565	-41.59	0.81	153.39	154.86	2.19	0	15.35	178	181	468	789	21.46	0.08	1.63	14.25	-9.97	-2.66	15.47	40.1	0	0	1	0
Cytosine	0.1% formic acid water	0.1% formic acid methanol	35% B isocratic elution	0.703951	0.21	-0.54	0.33	-0.84	-2.03	-4.06	-0.01	0	-3.6	22.95	-1.7	2	2	0	8	170	1110000000000	-247927	-34.38	0.87	136.73	126.12	2.1	0	12.89	167	25.9	432	122	12.95	9.67	6.77	18.33	-4	-2.61	13.02	67.5	1	1	3	0
Hypoxanthine	0.1% formic acid water	0.1% formic acid methanol	35% B isocratic elution	0.0122467	0.09	-0.62	1.31	-1.07	-1.64	-4.37	-0.59	0	-3.14	22.95	-0.5	2	3	0	10	190	11100000000000	-305849	-25.27	0.97	150.2	143.93	2.16	0.01	2.51	159	5.76	351	-26.8	8.83	8.14	3.33	11.33	-6.92	-2.86	2.6	70.1	2	2	4	0
Xanthine	0.1% formic acid water	0.1% formic acid methanol	35% B isocratic elution	-0.554203	-0.23	-0.68	1.37	-1.15	-1.62	-4.62	-0.59	0	-2.99	22.95	-0.7	3	3	0	11	217	111000000000000	-353097	-23.72	1.25	159.89	153.96	2.19	0.01	6.06	170	-15.1	367	-128	7.64	10.2	7.74	22.93	-2.99	-2.73	6.1	86.9	2	2	4	0
Guanine	0.1% formic acid water	0.1% formic acid methanol	35% B isocratic elution	0.18869	0.17	-0.86	0.35	-1.41	-2.04	-4.78	-0.59	0	-3.31	22.95	-1.1	3	3	0	11	225	1110000000000000	-340610	-30.43	1.22	164.42	158.81	2.2	0.01	3.28	191	-7.34	441	-50.1	10.78	11.63	4.81	13.86	-5.99	-2.81	3.34	96.2	2	2	5	0
Adenine	0.1% formic acid water	0.1% formic acid methanol	35% B isocratic elution	0.853288	0.43	-0.85	0.65	-1.27	-1.75	-4.54	-0.59	0	-3.06	22.95	-0.1	2	4	0	10	127	111000000000000	-293365	-30.51	0.99	153.88	148.09	2.17	0	11.17	161	9.31	380	47.5	10.2	8.73	5.5	15	-4.52	-2.45	11.33	80.5	2	2	5	0
Beta-Thymidine	0.1% formic acid water	0.1% formic acid methanol	35% B isocratic elution	-1.5936	-1.77	-1.19	1.16	-1.37	-1.69	-7.22	-0.97	0	-2.62	22.95	-1.2	3	5	2	17	381	1.11e+30	-549390	-24.52	1.42	246.36	266.66	2.43	0.01	4.01	176	50.1	310	96.6	9.28	5.39	15.53	45.1	-0.93	-3.96	6.43	99.1	1	2	2	0
Cytidine	0.1% formic acid water	0.1% formic acid methanol	35% B isocratic elution	-0.595681	-0.9	-1.68	-2.05	-2.02	-2.54	-6.93	-0.97	0	-3.04	22.95	-2.1	4	5	2	17	383	1.11e+29	-559442	-33.42	1.74	241.37	261.47	2.42	0.01	6.86	228	40.6	467	146	13.35	9.24	15.82	45.67	-2.4	-3.46	9.4	129	1	2	3	0
Inosine	0.1% formic acid water	0.1% formic acid methanol	35% B isocratic elution	-1.3319	-1.31	-1.89	-1.34	-2.48	-2.6	-7.41	-1.55	0	-2.92	22.95	-1.3	4	7	2	19	405	1.11e+30	-617361	-37.38	1.8	261.27	285.84	2.46	0.01	9.42	243	21.5	459	3.18	11.36	10.23	10.31	29.87	-2.75	-2.08	9.18	129	2	3	4	0
Xanthosine	0.1% formic acid water	0.1% formic acid methanol	35% B isocratic elution	-1.11071	-1.2	-1.84	-1.92	-2.32	-2.54	-7.47	-1.55	0	-2.84	22.95	-2.4	5	7	2	20	434	1.11e+31	-664603	-37.75	1.91	265.99	291.82	2.47	0.01	15.45	240	28.5	439	14	11	9.33	12.24	32.43	-2.45	-3.34	12.18	146	2	3	4	0
Guanosine	0.1% formic acid water	0.1% formic acid methanol	35% B isocratic elution	-0.837617	-0.68	-2.17	-2.39	-2.83	-2.87	-7.85	-1.55	0	-2.98	22.95	-1.9	5	7	2	20	446	1.11e+32	-652123	-42.64	2.09	276.17	298.73	2.48	0.01	11.43	271	-5.63	543	-85.9	12.26	14.35	13.14	36.02	-2.86	-2.22	11.13	155	2	3	5	0
Uridine	0.1% formic acid water	0.1% formic acid methanol	35% B isocratic elution	-0.95086	-1.04	-1.27	-0.25	-1.36	-1.72	-6.7	-0.97	0	-2.67	22.95	-2	4	6	2	17	371	1.11e+28	-571934	-25.98	1.71	235.87	256.94	2.41	0.01	5.57	194	28.6	328	37.3	8.29	6.3	11.64	34.25	-0.98	-1.56	4.28	119	1	2	2	0
Adenosine	0.1% formic acid water	0.1% formic acid methanol	35% B isocratic elution	0.0087614	-0.14	-1.3	0.66	-2.08	-1.62	-7.39	-1.55	0	-2.06	22.95	-1.1	4	8	2	19	335	1.11e+31	-604889	-23.66	1.73	253.58	283.19	2.45	0.01	2.18	191	36.3	322	107	8.99	5.54	14.19	39.95	-0.74	-3.53	3.84	140	2	3	5	0
D-Pantothenic acid	0.1% formic acid water	0.1% formic acid methanol	50% B isocratic elution	-0.954626	-0.76	-1.45	1.6	-0.1	-2.01	-7.34	1.14	0	-3.32	25.05	-1.1	4	5	6	15	239	1.11e+31	-492236	-26.02	1.56	247.96	269.32	2.43	0	7.46	186	7.26	354	-39.4	8.13	8.95	6.22	23.15	-1.05	-7.18	4.69	107	0	0	1	0
Niacinamide	0.1% formic acid water	0.1% formic acid methanol	50% B isocratic elution	0.429783	0.23	-0.44	3.02	-0.38	-0.95	-4.68	-0.01	0	-2.77	25.05	-0.4	1	2	1	9	114	111000000000000	-261773	-16.8	0.79	152.74	146.35	2.17	0	2.95	112	27.7	215	95.8	7.01	3.68	5.08	12.91	-3.24	-5.1	4.94	56	1	1	2	0
Pyridoxal	0.1% formic acid water	0.1% formic acid methanol	50% B isocratic elution	0.550562	0.17	-0.54	2.47	-0.74	-1.21	-5.64	-0.01	0	-2.49	25.05	0	2	4	2	12	162	1.11e+20	-370806	-16.87	1.08	190.02	193.09	2.29	0.01	3.53	121	8.31	226	-19.7	4.94	5.51	5.04	18.08	-1.4	-2.71	3.58	70.4	1	1	1	0
Pyridoxine	0.1% formic acid water	0.1% formic acid methanol	50% B isocratic elution	1.13869	0.77	-0.86	1.77	-0.95	-1.46	-5.8	-0.01	0	-2.69	25.05	-0.8	3	4	2	12	142	1.11e+22	-371565	-22.39	1.06	195.11	198.18	2.3	0	9.44	137	11.5	264	32	6.46	6.06	11.25	32	0.01	-3.22	2.9	73.6	1	1	1	0
Pyridoxamine	0.1% formic acid water	0.1% formic acid methanol	50% B isocratic elution	0.981245	0.62	-0.79	2.14	-0.9	-1.53	-5.97	-0.01	0	-2.64	25.05	-1	3	4	2	12	143	1.11e+23	-359090	-19.85	1.23	199.15	205.79	2.31	0.01	2.37	144	49.5	321	233	9.73	4.96	8.51	18.04	-0.23	-3.37	4.35	79.4	1	1	2	0
Thiamine	0.1% formic acid water	0.1% formic acid methanol	50% B isocratic elution	0.697198	0.4	0	0	-0.92	-1.45	-9.26	-0.97	0	-3.26	25.05	0	2	6	4	19	269	1.11e+34	-727954	-65.42	1.49	291.55	320.17	2.51	-0.99	0	200	-71.2	335	-70.9	6.56	7.95	14.5	36.27	1.75	-2.99	10.15	104	2	2	4	1
Nicotinic acid	0.1% formic acid water	0.1% formic acid methanol	50% B isocratic elution	0.12904	0.29	-0.13	3.56	-0.49	-0.93	-4.41	-0.01	0	-2.42	25.05	0.4	1	3	1	9	114	11100000000000	-274248	-12.08	0.77	149.15	142	2.15	0	0.88	92.9	1.16	177	-39.1	3.37	4.37	3.73	20.67	-2.73	-2.8	3.67	50.2	1	1	1	0
Alanine	0.1% formic acid water	0.1% formic acid methanol	50% B isocratic elution	-0.201346	-0.16	-0.21	3.79	0.72	-1.09	-3.57	1.14	0	-3.05	25.05	-3	2	3	1	6	61.8	1110000000000	-203245	-12.07	0.88	123.86	112.49	2.05	0	1.93	103	20.6	223	81.1	5.25	4.15	6.92	15.51	-0.69	-4.07	2.88	63.3	0	0	1	0
Leucine	0.1% formic acid water	0.1% formic acid methanol	50% B isocratic elution	0.293735	0.31	-0.15	3.98	0.54	-0.95	-5.35	1.14	0	-2.73	25.05	-1.5	2	3	3	9	101	1.11e+21	-277279	-11.49	0.91	176.64	178.51	2.25	0	1.75	97.3	10	188	15.9	4.1	4.03	4.32	23.12	-1.46	-4.42	4.6	63.3	0	0	1	0
Isoleucine	0.1% formic acid water	0.1% formic acid methanol	50% B isocratic elution	0.29526	0.3	-0.15	3.99	0.52	-0.92	-5.29	1.14	0	-2.69	25.05	-1.7	2	3	3	9	103	1.11e+21	-277278	-11.39	0.9	174.76	177.8	2.25	0	1.86	95.2	4.07	178	-13.2	3.66	4.06	5.29	24.73	-0.48	-4.81	8.21	63.3	0	0	1	0
Valine	0.1% formic acid water	0.1% formic acid methanol	50% B isocratic elution	0.163733	0.17	-0.3	3.48	1.11	-0.62	-4.7	1.14	0	-3.08	25.05	-2.3	2	3	2	8	90.4	1.11e+18	-252603	-16.64	0.58	154.87	154.22	2.19	0	7.95	86.9	30.2	126	74.6	3.87	1.16	5.48	13.49	-1.89	-5.23	8.12	63.3	0	0	1	0
Proline	0.1% formic acid water	0.1% formic acid methanol	50% B isocratic elution	0.313608	0.35	-0.25	3.62	-0.27	-0.99	-4.39	0.18	0	-2.61	25.05	-2.5	2	3	1	8	103	1.11e+16	-251835	-13.13	0.77	147.6	142.26	2.15	0	3.61	94.9	18	192	36.7	4.47	4	3.51	21.36	-3.35	-4.13	3.48	49.3	1	1	1	0
Phenylalanine	0.1% formic acid water	0.1% formic acid methanol	50% B isocratic elution	0.161782	0.2	-0.56	2.97	-0.48	-1.03	-6.1	-0.01	0	-2.56	25.05	-1.5	2	3	3	12	153	1.11e+22	-348280	-15.74	1.01	200.74	208.03	2.32	0	2.66	122	9.49	216	30.8	4.48	4.38	4.16	22.91	-1.94	-2.63	7.78	63.3	0	1	1	0
Methionine	0.1% formic acid water	0.1% formic acid methanol	50% B isocratic elution	-0.113286	-0.05	-0.51	3.26	0.45	-1.09	-5.83	1.14	0	-2.97	25.05	-1.9	2	4	4	9	97	1.11e+19	-502501	-15.83	1.08	186.45	185.96	2.27	0.01	4.25	126	19.1	229	42.1	4.86	4.41	4.94	22.93	-1.51	-3.09	4.05	88.6	0	0	1	1
Tryptophan	0.1% formic acid water	0.1% formic acid methanol	50% B isocratic elution	-0.239299	-0.2	-1.07	1.74	-1.22	-1.21	-7.11	-0.59	0	-2.5	25.05	-1.1	3	3	3	15	245	1.11e+26	-430876	-21.02	1.24	233.33	250.05	2.4	0	5.34	153	-10.6	271	-20.2	4.73	6.7	4.11	22.25	-1.98	-4.08	5.74	79.1	1	2	2	0
Serine	0.1% formic acid water	0.1% formic acid methanol	50% B isocratic elution	-0.498971	-0.26	-0.36	2.82	0.69	-1.12	-3.73	1.14	0	-3.14	25.05	-3.1	3	4	2	7	72.6	11100000000000	-250467	-14.94	1.06	132.32	122.02	2.09	0	3.06	118	4.07	216	-33.2	4.49	4.85	3.58	19.55	-4.08	-3.26	0.99	83.6	0	0	1	0
Glutamine	0.1% formic acid water	0.1% formic acid methanol	50% B isocratic elution	-0.500079	-0.31	-0.86	1.53	0.48	-1.72	-5.23	1.14	0	-3.7	25.05	-3.1	3	4	4	10	146	1.11e+19	-333835	-24.89	1.35	180.5	176.05	2.25	0	6.95	174	25	351	64	9.61	7.18	5.6	22.19	-3.61	-5.52	7.53	106	0	0	2	0
Threonine	0.1% formic acid water	0.1% formic acid methanol	50% B isocratic elution	-0.300477	-0.16	-0.38	3.49	0.53	-1.16	-4.3	1.14	0	-2.96	25.05	-2.9	3	4	2	8	93.3	1.11e+16	-275147	-14.56	1.14	149.43	144.38	2.16	0.01	4	119	6.4	228	-10.9	5.24	4.98	2.45	17.53	-4.59	-5.42	3.68	83.6	0	0	1	0
Cysteine	0.1% formic acid water	0.1% formic acid methanol	50% B isocratic elution	-0.764242	-0.43	-0.38	3.62	0.37	-0.87	-4.65	1.14	0	-2.79	25.05	-2.5	3	4	2	7	75.3	11100000000000	-453148	-13.45	1	147.18	141.36	2.15	0.01	3.06	108	-15.6	173	-97.6	1.79	4.69	5.27	20.11	-1.25	-3.34	5	64.3	0	0	1	1
Asparagine	0.1% formic acid water	0.1% formic acid methanol	50% B isocratic elution	-0.614108	-0.34	-0.67	2.07	0.63	-1.75	-4.56	1.14	0	-3.89	25.05	-3.4	3	4	3	9	134	1.11e+16	-309157	-24.85	1.33	160.84	155.26	2.19	0	3.88	177	14.7	352	34.5	9.05	7.57	3.77	19.29	-6.05	-4.96	6.4	106	0	0	2	0
Glutamicacid	0.1% formic acid water	0.1% formic acid methanol	50% B isocratic elution	-0.639391	-0.25	-0.73	2.12	0.93	-1.32	-4.9	1.14	0	-3.74	25.05	-3.7	3	5	4	10	145	1.11e+18	-346311	-25.1	1.06	172.73	167.41	2.22	0	8.05	150	9.3	247	-26.7	4.8	5.32	4.16	20.54	-4.48	-4.16	4.84	101	0	0	1	1
Lysine	0.1% formic acid water	0.1% formic acid methanol	50% B isocratic elution	-0.0118741	-0.21	-0.79	2.83	1	-1.09	-5.78	1.14	0	-3.43	25.05	-3	3	4	5	10	106	1.11e+23	-312026	-21.17	0.86	191.1	191.01	2.28	0	5.99	127	75.3	255	325	8.64	1.15	8.95	18.74	-1	-1.73	0.96	89.3	0	0	2	0
Arginine	0.1% formic acid water	0.1% formic acid methanol	50% B isocratic elution	0.424891	0.11	-1.22	1.47	0.68	-1.48	-6.43	1.14	0	-3.73	25.05	-4.2	4	4	5	12	176	1.11e+25	-380778	-28.48	1.38	214.93	214.24	2.33	0	9.11	182	56.4	339	241	10.62	3.9	10.66	22.26	-2.7	-2.93	1.97	128	0	0	4	0
Histidine	0.1% formic acid water	0.1% formic acid methanol	50% B isocratic elution	0.226101	0	-0.87	1.3	0.08	-1.32	-5.34	0.18	0	-3.58	25.05	-3.2	3	4	3	11	151	1.11e+19	-344509	-27.47	0.98	180.91	181.77	2.26	0	5.04	160	36.7	296	139	8.38	4.38	5.7	14.6	-3.9	-4.52	8.26	92	1	1	3	0
Citrulline	0.1% formic acid water	0.1% formic acid methanol	50% B isocratic elution	-0.633443	-0.42	-1.23	1.3	0.37	-2.08	-6.28	1.14	0	-3.96	25.05	-4.3	4	4	5	12	171	1.11e+24	-393268	-29.64	1.53	214.73	215.15	2.33	0	7.6	204	40.5	433	151	12.42	8.36	5.05	24.14	-4.38	-3.03	2.31	118	0	0	3	0
Taurine	0.1% formic acid water	0.1% formic acid methanol	50% B isocratic elution	-0.978507	-0.79	-0.56	3.08	0.76	-1.33	-4.01	1.14	0	-3.48	25.05	-4.1	2	4	2	7	120	11100000000000	-476406	-18.56	1.09	143.51	133.49	2.13	0.01	3.57	138	-7.89	285	-71.8	4.16	6.16	-2.47	10.55	-10.36	-3.86	3.47	88.8	0	0	1	1
Tyrosine	0.1% formic acid water	0.1% formic acid methanol	50% B isocratic elution	0.362461	0.04	-1.02	2.22	-0.79	-1.58	-6.22	-0.01	0	-2.88	25.05	-2.3	3	4	3	13	176	1.11e+23	-395507	-20.45	1.27	210.41	219.03	2.34	0	4.34	158	-11.2	301	-58.2	5.35	7.81	4.18	23.28	-2.58	-2.6	8.84	83.6	0	1	1	0
Hypotaurine	0.1% formic acid water	0.1% formic acid methanol	50% B isocratic elution	-0.727785	-0.42	-0.46	3.16	0.62	-1.33	-4.11	1.14	0	-3.43	25.05	-1.5	2	4	2	6	55.5	1110000000000	-429187	-19.14	0.95	136.46	125.99	2.1	0	5.56	129	43.8	272	164	8.05	3.84	8.34	19	-1.9	-2.55	5.19	82.5	0	0	1	1
L-Hydroxyproline	0.1% formic acid water	0.1% formic acid methanol	50% B isocratic elution	-0.225423	-0.05	-0.61	2.82	-0.41	-1.57	-4.49	0.18	0	-3.06	25.05	-3.3	3	4	1	9	125	1.11e+17	-299059	-18.75	1.12	155.95	154.27	2.19	0	3.05	140	34.4	301	118	8.1	5.75	7.9	18.5	-1.19	-2.19	3.72	69.6	1	1	1	0
N-omiga-acetylhistamine	0.1% formic acid water	0.1% formic acid methanol	50% B isocratic elution	1.23862	0.88	-0.99	2.28	-0.19	-1.43	-6.03	0.18	0	-3.36	25.05	-0.4	2	2	3	11	138	1.11e+21	-321960	-23.57	0.83	195.51	194.44	2.29	0	4.66	148	58.4	320	214	11.2	4.88	6.06	14.64	-2.8	-2.61	4.77	57.8	1	1	3	0
L-pyroglutamic acid	0.1% formic acid water	0.1% formic acid methanol	50% B isocratic elution	-0.713966	-0.54	-0.57	2.43	-0.17	-1.38	-4.35	0.18	0	-3.23	25.05	-0.8	2	3	1	9	154	1110000000000000	-298326	-20.95	0.96	151.34	146.44	2.17	0	7.17	137	11.3	267	-26.3	6.36	6.48	3.66	21.17	-4.87	-2.3	6.22	66.4	1	1	1	0
Tyramine	0.1% formic acid water	0.1% formic acid methanol	50% B isocratic elution	0.422428	-0.09	-0.39	3.22	-0.59	-1.03	-5.7	-0.01	0	-2.52	25.05	1.1	2	2	2	10	87.3	1.11e+20	-277120	-13.98	0.82	183.62	181.83	2.26	0	2.6	106	27.2	227	168	5.88	3.52	8.82	18.57	0.95	-2.63	3.17	46.2	0	1	1	0
Histamine	0.1% formic acid water	0.1% formic acid methanol	50% B isocratic elution	0.359776	0.71	-0.67	2.94	-0.16	-1.22	-4.78	0.18	0	-3.06	25.05	-0.7	2	2	2	8	64.7	1.11e+16	-226118	-18.32	0.8	155.19	146.49	2.17	0	4.89	122	68.6	307	360	10.5	2.98	8.7	18.47	-1.26	-2.85	4.92	54.7	1	1	3	0
AaC	0.1% formic acid water	0.1% formic acid methanol	50% B isocratic elution	0.963714	0.63	-0.56	2.2	-1.91	-0.57	-6.68	-1.36	0.01	-1.76	25.05	2.6	2	2	0	14	219	1.11e+22	-369670	-14.85	0.86	210.7	216.51	2.34	0	2.51	108	-19	154	-31.5	2.67	3.95	5.78	12.59	0.02	-2.83	2.59	54.7	2	3	3	0
IQx	0.1% formic acid water	0.1% formic acid methanol	50% B isocratic elution	1.06779	0.62	-0.99	0.96	-1.78	-1.17	-6.74	-1.36	0	-2.32	25.05	0.6	1	4	0	15	246	1.11e+23	-414479	-25.04	0.93	218.25	227.81	2.36	0.01	8.8	141	56.1	274	235	9.64	3.08	5.71	14.84	-2.23	-2.75	8.88	69.6	2	3	5	0
8-MeIQx	0.1% formic acid water	0.1% formic acid methanol	50% B isocratic elution	1.06459	0.67	-1.08	0.92	-1.86	-1.2	-7.38	-1.36	0	-2.24	25.05	1	1	4	0	16	271	1.11e+26	-439162	-25.13	0.98	237.6	249.06	2.4	0.01	7.72	142	63.8	281	265	10.06	2.97	5.88	15.22	-1.59	-1.95	7.78	69.6	2	3	5	0
MeIQ	0.1% formic acid water	0.1% formic acid methanol	50% B isocratic elution	1.17336	0.75	-0.83	1.35	-1.97	-0.87	-7.46	-1.36	0.01	-1.86	25.05	2	1	3	0	16	270	1.11e+27	-429091	-21.18	0.93	236.91	253.92	2.4	0	9.17	124	38.5	216	166	7.22	2.74	7.22	16.13	0.27	-4.33	9.28	56.7	2	3	4	0
IQ[4,5-b]	0.1% formic acid water	0.1% formic acid methanol	50% B isocratic elution	1.05045	0.68	-1.04	0.7	-1.85	-1.14	-6.99	-1.36	0	-2.35	25.05	1.7	1	3	0	15	245	1.11e+24	-404413	-27.45	0.9	223.43	232.81	2.37	0	10.84	139	39.2	269	182	8.87	4.02	6.83	16.69	-0.82	-4.58	11	56.7	2	3	4	0
Harman	0.1% formic acid water	0.1% formic acid methanol	50% B isocratic elution	1.26923	0.9	-0.15	2.69	-1.88	-0.49	-6.88	-1.36	0.01	-1.58	25.05	3.6	1	1	0	14	216	1.11e+23	-359587	-12.73	0.59	214.44	223.28	2.35	0	4.55	81.6	10	132	63.3	3.7	2.33	7.72	16.34	1.94	-4.95	4.58	28.7	2	3	2	0
IQ	0.1% formic acid water	0.1% formic acid methanol	50% B isocratic elution	1.25711	0.87	-0.77	1.43	-1.93	-0.85	-6.98	-1.36	0	-1.93	25.05	1.5	1	3	0	15	245	1.11e+24	-404413	-20.86	0.92	222.22	233.02	2.37	0	8.83	123	32.7	213	148	6.9	2.78	7	15.75	-0.15	-2.69	8.95	56.7	2	3	4	0
Norharman	0.1% formic acid water	0.1% formic acid methanol	50% B isocratic elution	1.20452	0.81	-0.27	2.73	-1.82	-0.56	-6.28	-1.36	0.01	-1.76	25.05	3.2	1	1	0	13	193	1.11e+20	-334905	-13.23	0.56	196.55	201.82	2.3	0	4.61	85.1	3.38	142	46.2	3.74	2.88	7.61	16.32	1.37	-4.84	4.64	28.7	2	3	2	0
DMIP	0.1% formic acid water	0.1% formic acid methanol	50% B isocratic elution	1.25027	0.83	-0.92	1.51	-0.95	-1.2	-6.06	-0.59	0	-2.73	25.05	1	1	3	0	12	172	1.11e+21	-332645	-25.27	0.81	195.56	198.01	2.3	0.01	9.99	128	57.4	269	243	9.75	3.19	7.16	17.5	-1.15	-4.24	10.15	56.7	2	2	4	0
Phe-p-1	0.1% formic acid water	0.1% formic acid methanol	50% B isocratic elution	1.29252	0.93	-0.22	2.74	-1.64	-0.47	-6.68	-1.16	0.01	-1.71	25.05	2.3	1	2	1	13	152	1.11e+22	-335660	-12.87	0.73	209.56	213.73	2.33	0	3.22	91.3	4.88	123	51	3.16	1.78	7	14.9	1.32	-6	3.7	38.9	1	2	2	0
7,8-DiMeIQx	0.1% formic acid water	0.1% formic acid methanol	50% B isocratic elution	1.1375	0.76	-1.14	0.84	-1.95	-1.21	-7.94	-1.36	0	-2.15	25.05	1.4	1	4	0	17	297	1.11e+29	-463843	-25.35	1.03	254.55	269.67	2.43	0.01	6.62	143	68.9	284	281	10.44	2.87	6.01	15.48	-1.09	-4.51	6.74	69.6	2	3	5	0
Sarcosine	0.1% formic acid water	0.1% formic acid methanol	50% B isocratic elution	-0.205673	-0.16	-0.15	4.28	0.75	-1.02	-3.74	1.14	0	-3.03	25.05	-2.8	2	3	2	6	52.8	1110000000000	-203238	-12.38	0.78	127.98	113.01	2.05	0	2.92	94.2	17.5	201	42.4	4.57	4.19	4.37	24.65	-2.74	-4.93	8.22	49.3	0	0	1	0
Creatinine	0.1% formic acid water	0.1% formic acid methanol	50% B isocratic elution	0.850506	0.58	-0.7	1.29	-0.03	-1.53	-4.33	0.18	0	-3.65	25.05	-1.8	1	1	0	8	151	111000000000000	-248681	-30.05	0.8	143.83	134.46	2.13	0	11.98	146	74.4	333	274	12.86	4.35	5.11	15.98	-5.3	-5.49	12.08	58.7	1	1	3	0
L-dihydroorotic acid	0.1% formic acid water	0.1% formic acid methanol	50% B isocratic elution	-1.75896	-2.18	-0.73	1.72	-0.45	-1.6	-4.65	-0.01	0	-3.31	25.05	-1.5	3	4	1	11	225	1.11e+16	-379565	-23.86	1.38	167.39	163.4	2.21	0.01	5.18	172	-17.2	327	-144	5.51	8.7	2.35	17.25	-6.68	-4.92	4.87	95.5	1	1	2	0
L-Carnosine	0.1% formic acid water	0.1% formic acid methanol	50% B isocratic elution	-0.0126241	-0.16	-1.67	-0.26	-0.6	-2.37	-7.52	0.18	0	-3.86	25.05	-4	4	5	6	16	259	1.11e+29	-499765	-38.44	1.62	256.29	270.05	2.43	0	12.99	233	51	527	223	14.27	9.82	9.18	20.43	-2.61	-2.2	9.07	121	1	1	4	0
Betaine	0.1% formic acid water	0.1% formic acid methanol	50% B isocratic elution	0.704932	0.53	-1.58	-0.47	1.1	-2.13	-4.67	1.14	0	-4.78	25.05	0.5	0	2	1	8	87.6	1.11e+18	-252565	-41.59	0.81	153.39	154.86	2.19	0	15.35	178	181	468	789	21.46	0.08	1.63	14.25	-9.97	-2.66	15.47	40.1	0	0	1	0
Cytosine	0.1% formic acid water	0.1% formic acid methanol	50% B isocratic elution	0.679326	0.31	-0.3	0.33	-0.66	-1.87	-4.1	-0.01	0	-3.74	25.05	-1.7	2	2	0	8	170	1110000000000	-247927	-34.38	0.87	136.73	126.12	2.1	0	12.89	167	25.9	432	122	12.95	9.67	6.77	18.33	-4	-2.61	13.02	67.5	1	1	3	0
[truncated: 192 more rows]

## Sheet: ANN-C
Compounds	Mobile phase A	Mobile phase B	Elution conditions	predicted_values	true_values	ln(gamma)	log(pv)	Total mean interaction energy in the mix (H_int)	H-Bond interaction energy in the mix (H_HB)	VdW interaction energy in the mix (H_vdW)	Gas liquid transition energy in the mix (H_glt)	w_RS	log10(S_RS)	Solvent_MolWeight	XLogP3	Hydrogen Bond Donor Count	Hydrogen Bond Acceptor Count	Rotatable Bond Count	Heavy Atom Count	Complexity	Atomic weights	E_gas	E_diel	Averaging corr dE	Area	Volume	Log(MV)	Total COSMO charge	Dipole moment t_value	Sigma2	Sigma3	Sigma4	Sigma5	H-bond moment (accept)	H-bond moment (donor)	PKA(25,H2O)	PKA(25,MeCN)	logD	WANS*10^5	丨d丨(dipole moment)	Polar Surface Area	Nitrogen Heterocycle Count	Ring Count	Nitrogen Count	Sulfur Count
[truncated: 815 more rows]

[truncated: 4 more sheets: MLR-MC, RF-MC, ANN-MC, Original data]
