# Supplementary material for: Prediction of mass spectrometry ionization efficiency based on COSMO-RS and machine learning algorithms
Source: Royal Society of Chemistry journal article supplement (doi:10.1039/d4an00301b), 2024-01-01
Supplement: d4an00301b3.xlsx [file d4an00301b3.xlsx]

## Sheet: MLR-C
Compounds	Mobile phase A	Mobile phase B	Elution conditions	Peak time	B%	predicted_values	true_values	ln(gamma)	log(pv)	Total mean interaction energy in the mix (H_int)	H-Bond interaction energy in the mix (H_HB)	VdW interaction energy in the mix (H_vdW)	Gas liquid transition energy in the mix (H_glt)	w_RS	log10(S_RS)	Solvent_MolWeight	XLogP3	Hydrogen Bond Donor Count	Hydrogen Bond Acceptor Count	Rotatable Bond Count	Heavy Atom Count	Complexity	Atomic weights	E_gas	E_diel	Averaging corr dE	Area	Volume	Log(MV)	Total COSMO charge	Dipole moment t_value	Sigma2	Sigma3	Sigma4	Sigma5	H-bond moment (accept)	H-bond moment (donor)	PKA(25,H2O)	PKA(25,MeCN)	logD	WANS*10^5	丨d丨(dipole moment)	Polar Surface Area	Nitrogen Heterocycle Count	Ring Count	Nitrogen Count	Sulfur Count
D-Pantothenic acid	Pure water	Pure methanol	gradient elution	1.7	2.30667	-1.18859	-0.9	0.19	1.6	1.49	-2.76	-6.72	1.14	0	-3.93	18.34	-1.1	4	5	6	15	239	1.11e+31	-492236	-26.02	1.56	247.96	269.32	2.43	0	7.46	186	7.26	354	-39.4	8.13	8.95	6.22	23.15	-1.05	-7.18	4.69	107	0	0	1	0
Niacinamide	Pure water	Pure methanol	gradient elution	4.21	18.7053	0.780022	0.76	-0.2	3.02	-0.07	-1.19	-4.53	-0.01	0	-2.81	20.64	-0.4	1	2	1	9	114	111000000000000	-261773	-16.8	0.79	152.74	146.35	2.17	0	2.95	112	27.7	215	95.8	7.01	3.68	5.08	12.91	-3.24	-5.1	4.94	56	1	1	2	0
Pyridoxal	Pure water	Pure methanol	gradient elution	3.4	13.4133	0.473385	1.03	0.32	2.47	0.24	-1.52	-5.31	-0.01	0	-2.79	19.9	0	2	4	2	12	162	1.11e+20	-370806	-16.87	1.08	190.02	193.09	2.29	0.01	3.53	121	8.31	226	-19.7	4.94	5.51	5.04	18.08	-1.4	-2.71	3.58	70.4	1	1	1	0
Biotin	Pure water	Pure methanol	gradient elution	5.13	24.716	-0.831285	-1.01	-1.32	0.62	-0.66	-1.95	-8.07	-0.4	0	-3.1	21.48	0.3	3	4	5	16	298	1.11e+31	-705617	-29.67	1.27	265.94	285.19	2.46	0	8.59	187	46.4	337	92.1	9.56	6.53	5.1	24.78	-2.78	-2.77	9.65	104	1	2	2	1
Pyridoxine	Pure water	Pure methanol	gradient elution	4.51	20.6653	0.979773	1.55	-0.46	1.77	-0.41	-1.73	-5.58	-0.01	0	-2.81	20.91	-0.8	3	4	2	12	142	1.11e+22	-371565	-22.39	1.06	195.11	198.18	2.3	0	9.44	137	11.5	264	32	6.46	6.06	11.25	32	0.01	-3.22	2.9	73.6	1	1	1	0
Pyridoxamine	Pure water	Pure methanol	gradient elution	4.7	21.9067	0.957476	1.31	-0.41	2.14	-0.4	-1.81	-5.77	-0.01	0	-2.75	21.09	-1	3	4	2	12	143	1.11e+23	-359090	-19.85	1.23	199.15	205.79	2.31	0.01	2.37	144	49.5	321	233	9.73	4.96	8.51	18.04	-0.23	-3.37	4.35	79.4	1	1	2	0
Thiamine	Pure water	Pure methanol	gradient elution	7.5	40.2	0.742	1.36	0	0	-0.75	-1.53	-9.18	-0.97	0	-3.29	23.65	0	2	6	4	19	269	1.11e+34	-727954	-65.42	1.49	291.55	320.17	2.51	-0.99	0	200	-71.2	335	-70.9	6.56	7.95	14.5	36.27	1.75	-2.99	10.15	104	2	2	4	1
Nicotinic acid	Pure water	Pure methanol	gradient elution	0.98	1	0.18186	0.68	1.42	3.56	0.98	-1.28	-3.94	-0.01	0	-2.99	18.16	0.4	1	3	1	9	114	11100000000000	-274248	-12.08	0.77	149.15	142	2.15	0	0.88	92.9	1.16	177	-39.1	3.37	4.37	3.73	20.67	-2.73	-2.8	3.67	50.2	1	1	1	0
Glycine	Pure water	Pure methanol	gradient elution	0.8	1	-0.35767	-0.68	0.42	4.08	1.18	-1.56	-2.67	1.14	0	-3.39	18.16	-3.2	2	3	1	5	42.9	1111111111	-178568	-12.73	0.91	106.87	90.66	1.96	0	1.77	108	19.8	231	83.2	5.48	4.2	6.42	14.8	-1.74	-5.51	8.14	63.3	0	0	1	0
Alanine	Pure water	Pure methanol	gradient elution	0.82	1	-0.213404	0.12	0.84	3.79	1.55	-1.5	-3.22	1.14	0	-3.4	18.16	-3	2	3	1	6	61.8	1110000000000	-203245	-12.07	0.88	123.86	112.49	2.05	0	1.93	103	20.6	223	81.1	5.25	4.15	6.92	15.51	-0.69	-4.07	2.88	63.3	0	0	1	0
Leucine	Pure water	Pure methanol	gradient elution	2.04	4.528	0.060724	0.61	1.58	3.98	2.22	-1.29	-4.97	1.14	0	-3.38	18.65	-1.5	2	3	3	9	101	1.11e+21	-277279	-11.49	0.91	176.64	178.51	2.25	0	1.75	97.3	10	188	15.9	4.1	4.03	4.32	23.12	-1.46	-4.42	4.6	63.3	0	0	1	0
Isoleucine	Pure water	Pure methanol	gradient elution	1.89	3.548	0.163349	0.5	1.68	3.99	2.28	-1.26	-4.91	1.14	0	-3.39	18.51	-1.7	2	3	3	9	103	1.11e+21	-277278	-11.39	0.9	174.76	177.8	2.25	0	1.86	95.2	4.07	178	-13.2	3.66	4.06	5.29	24.73	-0.48	-4.81	8.21	63.3	0	0	1	0
Valine	Pure water	Pure methanol	gradient elution	1.04	1	0.42108	0.43	1.05	3.48	2.27	-0.96	-4.35	1.14	0	-3.57	18.16	-2.3	2	3	2	8	90.4	1.11e+18	-252603	-16.64	0.58	154.87	154.22	2.19	0	7.95	86.9	30.2	126	74.6	3.87	1.16	5.48	13.49	-1.89	-5.23	8.12	63.3	0	0	1	0
Proline	Pure water	Pure methanol	gradient elution	0.96	1	0.102366	0.62	1.16	3.62	0.95	-1.39	-4	0.18	0	-3.11	18.16	-2.5	2	3	1	8	103	1.11e+16	-251835	-13.13	0.77	147.6	142.26	2.15	0	3.61	94.9	18	192	36.7	4.47	4	3.51	21.36	-3.35	-4.13	3.48	49.3	1	1	1	0
Phenylalanine	Pure water	Pure methanol	gradient elution	4.4	19.9467	0.311762	0.34	0.05	2.97	0.3	-1.22	-5.87	-0.01	0	-2.77	20.81	-1.5	2	3	3	12	153	1.11e+22	-348280	-15.74	1.01	200.74	208.03	2.32	0	2.66	122	9.49	216	30.8	4.48	4.38	4.16	22.91	-1.94	-2.63	7.78	63.3	0	1	1	0
Methionine	Pure water	Pure methanol	gradient elution	1.4	1	-0.281073	0.24	1.24	3.26	2.08	-1.52	-5.31	1.14	0	-3.62	18.16	-1.9	2	4	4	9	97	1.11e+19	-502501	-15.83	1.08	186.45	185.96	2.27	0.01	4.25	126	19.1	229	42.1	4.86	4.41	4.94	22.93	-1.51	-3.09	4.05	88.6	0	0	1	1
Tryptophan	Pure water	Pure methanol	gradient elution	5.36	26.2187	-0.122661	-0.08	-0.71	1.74	-0.62	-1.37	-6.93	-0.59	0	-2.61	21.69	-1.1	3	3	3	15	245	1.11e+26	-430876	-21.02	1.24	233.33	250.05	2.4	0	5.34	153	-10.6	271	-20.2	4.73	6.7	4.11	22.25	-1.98	-4.08	5.74	79.1	1	2	2	0
Serine	Pure water	Pure methanol	gradient elution	0.8	1	-0.187977	-0.42	0.59	2.82	1.41	-1.57	-3.34	1.14	0	-3.45	18.16	-3.1	3	4	2	7	72.6	11100000000000	-250467	-14.94	1.06	132.32	122.02	2.09	0	3.06	118	4.07	216	-33.2	4.49	4.85	3.58	19.55	-4.08	-3.26	0.99	83.6	0	0	1	0
Glutamine	Pure water	Pure methanol	gradient elution	0.83	1	-0.52411	-0.02	-0.22	1.53	0.89	-2.44	-4.79	1.14	0	-3.87	18.16	-3.1	3	4	4	10	146	1.11e+19	-333835	-24.89	1.35	180.5	176.05	2.25	0	6.95	174	25	351	64	9.61	7.18	5.6	22.19	-3.61	-5.52	7.53	106	0	0	2	0
Threonine	Pure water	Pure methanol	gradient elution	0.83	1	-0.213671	-0.19	1	3.49	1.7	-1.63	-3.86	1.14	0	-3.45	18.16	-2.9	3	4	2	8	93.3	1.11e+16	-275147	-14.56	1.14	149.43	144.38	2.16	0.01	4	119	6.4	228	-10.9	5.24	4.98	2.45	17.53	-4.59	-5.42	3.68	83.6	0	0	1	0
Cysteine	Pure water	Pure methanol	gradient elution	0.87	1	-0.524069	-1.13	1.02	3.62	1.64	-1.19	-4.18	1.14	0	-3.3	18.16	-2.5	3	4	2	7	75.3	11100000000000	-453148	-13.45	1	147.18	141.36	2.15	0.01	3.06	108	-15.6	173	-97.6	1.79	4.69	5.27	20.11	-1.25	-3.34	5	64.3	0	0	1	1
Asparagine	Pure water	Pure methanol	gradient elution	0.81	1	-0.565106	-0.64	-0.51	2.07	0.57	-2.46	-4.16	1.14	0	-3.86	18.16	-3.4	3	4	3	9	134	1.11e+16	-309157	-24.85	1.33	160.84	155.26	2.19	0	3.88	177	14.7	352	34.5	9.05	7.57	3.77	19.29	-6.05	-4.96	6.4	106	0	0	2	0
Glutamic acid	Pure water	Pure methanol	gradient elution	0.6	1	-0.476682	-0.76	-0.05	2.12	1.4	-1.87	-4.41	1.14	0	-3.93	18.16	-3.7	3	5	4	10	145	1.11e+18	-346311	-25.1	1.06	172.73	167.41	2.22	0	8.05	150	9.3	247	-26.7	4.8	5.32	4.16	20.54	-4.48	-4.16	4.84	101	0	0	1	1
Lysine	Pure water	Pure methanol	gradient elution	1.4	1	-0.0332615	0.34	0.51	2.83	2.08	-1.6	-5.39	1.14	0	-3.89	18.16	-3	3	4	5	10	106	1.11e+23	-312026	-21.17	0.86	191.1	191.01	2.28	0	5.99	127	75.3	255	325	8.64	1.15	8.95	18.74	-1	-1.73	0.96	89.3	0	0	2	0
Arginine	Pure water	Pure methanol	gradient elution	1.5	1	0.0507647	1.31	-0.43	1.47	1.17	-2.23	-6.02	1.14	0	-3.97	18.16	-4.2	4	4	5	12	176	1.11e+25	-380778	-28.48	1.38	214.93	214.24	2.33	0	9.11	182	56.4	339	241	10.62	3.9	10.66	22.26	-2.7	-2.93	1.97	128	0	0	4	0
Histidine	Pure water	Pure methanol	gradient elution	1.35	1	0.44403	1.03	-0.54	1.3	0.29	-1.91	-4.93	0.18	0	-3.62	18.16	-3.2	3	4	3	11	151	1.11e+19	-344509	-27.47	0.98	180.91	181.77	2.26	0	5.04	160	36.7	296	139	8.38	4.38	5.7	14.6	-3.9	-4.52	8.26	92	1	1	3	0
Citrulline	Pure water	Pure methanol	gradient elution	0.87	1	-0.0462344	-0.27	-0.54	1.3	0.87	-2.92	-5.79	1.14	0	-4.15	18.16	-4.3	4	4	5	12	171	1.11e+24	-393268	-29.64	1.53	214.73	215.15	2.33	0	7.6	204	40.5	433	151	12.42	8.36	5.05	24.14	-4.38	-3.03	2.31	118	0	0	3	0
Taurine	Pure water	Pure methanol	gradient elution	0.8	1	-0.927073	-1.43	0.11	3.08	1.25	-1.79	-3.57	1.14	0	-3.67	18.16	-4.1	2	4	2	7	120	11100000000000	-476406	-18.56	1.09	143.51	133.49	2.13	0.01	3.57	138	-7.89	285	-71.8	4.16	6.16	-2.47	10.55	-10.36	-3.86	3.47	88.8	0	0	1	1
Aspartic acid	Pure water	Pure methanol	gradient elution	0.6	1	-1.21295	-1.3	-0.2	2.73	0.87	-2.4	-3.69	1.14	0	-3.77	18.16	-2.8	3	5	3	9	133	1110000000000000	-321630	-21.27	1.32	154.67	151	2.18	0.01	2.79	162	-13.7	337	-89.9	5.61	8.84	3.86	21.36	-4.48	-3.1	8.53	101	0	0	1	0
Tyrosine	Pure water	Pure methanol	gradient elution	5.2	25.1733	-0.0158041	0.83	-0.75	2.22	-0.33	-1.8	-6.02	-0.01	0	-2.95	21.55	-2.3	3	4	3	13	176	1.11e+23	-395507	-20.45	1.27	210.41	219.03	2.34	0	4.34	158	-11.2	301	-58.2	5.35	7.81	4.18	23.28	-2.58	-2.6	8.84	83.6	0	1	1	0
Hypotaurine	Pure water	Pure methanol	gradient elution	0.82	1	-0.432502	-0.93	0.03	3.16	0.84	-1.88	-3.74	1.14	0	-3.53	18.16	-1.5	2	4	2	6	55.5	1110000000000	-429187	-19.14	0.95	136.46	125.99	2.1	0	5.56	129	43.8	272	164	8.05	3.84	8.34	19	-1.9	-2.55	5.19	82.5	0	0	1	1
L-Hydroxyproline	Pure water	Pure methanol	gradient elution	0.84	1	-0.126027	0.02	0.21	2.82	0.21	-2.18	-4.04	0.18	0	-3.32	18.16	-3.3	3	4	1	9	125	1.11e+17	-299059	-18.75	1.12	155.95	154.27	2.19	0	3.05	140	34.4	301	118	8.1	5.75	7.9	18.5	-1.19	-2.19	3.72	69.6	1	1	1	0
N-omiga-acetylhistamine	Pure water	Pure methanol	gradient elution	4.6	21.2533	0.868164	1.64	-0.89	2.28	0.05	-1.73	-5.87	0.18	0	-3.35	21	-0.4	2	2	3	11	138	1.11e+21	-321960	-23.57	0.83	195.51	194.44	2.29	0	4.66	148	58.4	320	214	11.2	4.88	6.06	14.64	-2.8	-2.61	4.77	57.8	1	1	3	0
L-pyroglutamic acid	Pure water	Pure methanol	gradient elution	0.83	1	-0.479771	-0.34	0.04	2.43	0.28	-1.92	-3.91	0.18	0	-3.39	18.16	-0.8	2	3	1	9	154	1110000000000000	-298326	-20.95	0.96	151.34	146.44	2.17	0	7.17	137	11.3	267	-26.3	6.36	6.48	3.66	21.17	-4.87	-2.3	6.22	66.4	1	1	1	0
Histamine	Pure water	Pure methanol	gradient elution	4.6	21.2533	0.429235	-0.03	-0.53	2.94	0.05	-1.46	-4.65	0.18	0	-3.07	21	-0.7	2	2	2	8	64.7	1.11e+16	-226118	-18.32	0.8	155.19	146.49	2.17	0	4.89	122	68.6	307	360	10.5	2.98	8.7	18.47	-1.26	-2.85	4.92	54.7	1	1	3	0
AaC	Pure water	Pure methanol	gradient elution	10	56.5333	0.922789	1.51	-0.63	2.2	-2.05	-0.55	-6.71	-1.36	0.01	-1.74	25.95	2.6	2	2	0	14	219	1.11e+22	-369670	-14.85	0.86	210.7	216.51	2.34	0	2.51	108	-19	154	-31.5	2.67	3.95	5.78	12.59	0.02	-2.83	2.59	54.7	2	3	3	0
IQx	Pure water	Pure methanol	gradient elution	7.35	39.22	0.989688	1.68	-0.94	0.96	-1.63	-1.26	-6.67	-1.36	0	-2.32	23.52	0.6	1	4	0	15	246	1.11e+23	-414479	-25.04	0.93	218.25	227.81	2.36	0.01	8.8	141	56.1	274	235	9.64	3.08	5.71	14.84	-2.23	-2.75	8.88	69.6	2	3	5	0
MeAaC	Pure water	Pure methanol	gradient elution	10.95	62.74	1.19875	1.49	-0.63	2.3	-2.23	-0.49	-7.31	-1.36	0.01	-1.6	26.82	2.9	2	2	0	15	243	1.11e+25	-394350	-14.53	0.87	227.94	238.72	2.38	0	2.95	104	-11.8	144	-14.1	2.67	3.43	5.81	12.56	0.58	-2.26	3.04	54.7	2	3	3	0
8-MeIQx	Pure water	Pure methanol	gradient elution	8.27	45.2307	1.12678	1.68	-1.05	0.92	-1.78	-1.23	-7.35	-1.36	0	-2.24	24.36	1	1	4	0	16	271	1.11e+26	-439162	-25.13	0.98	237.6	249.06	2.4	0.01	7.72	142	63.8	281	265	10.06	2.97	5.88	15.22	-1.59	-1.95	7.78	69.6	2	3	5	0
MeIQ	Pure water	Pure methanol	gradient elution	8.77	48.4973	1.21455	1.65	-0.82	1.35	-1.94	-0.88	-7.45	-1.36	0.01	-1.87	24.82	2	1	3	0	16	270	1.11e+27	-429091	-21.18	0.93	236.91	253.92	2.4	0	9.17	124	38.5	216	166	7.22	2.74	7.22	16.13	0.27	-4.33	9.28	56.7	2	3	4	0
IQ[4,5-b]	Pure water	Pure methanol	gradient elution	8.9	49.3467	0.97186	1.67	-1.04	0.7	-1.85	-1.15	-6.98	-1.36	0	-2.35	24.94	1.7	1	3	0	15	245	1.11e+24	-404413	-27.45	0.9	223.43	232.81	2.37	0	10.84	139	39.2	269	182	8.87	4.02	6.83	16.69	-0.82	-4.58	11	56.7	2	3	4	0
Harman	Pure water	Pure methanol	gradient elution	10.5	59.8	1.36874	2.02	-0.28	2.69	-2.12	-0.47	-6.93	-1.36	0.01	-1.55	26.4	3.6	1	1	0	14	216	1.11e+23	-359587	-12.73	0.59	214.44	223.28	2.35	0	4.55	81.6	10	132	63.3	3.7	2.33	7.72	16.34	1.94	-4.95	4.58	28.7	2	3	2	0
IQ	Pure water	Pure methanol	gradient elution	8.09	44.0547	1.1068	1.64	-0.72	1.43	-1.82	-0.89	-6.95	-1.36	0	-1.94	24.19	1.5	1	3	0	15	245	1.11e+24	-404413	-20.86	0.92	222.22	233.02	2.37	0	8.83	123	32.7	213	148	6.9	2.78	7	15.75	-0.15	-2.69	8.95	56.7	2	3	4	0
Norharman	Pure water	Pure methanol	gradient elution	10.33	58.6893	1.17238	1.98	-0.36	2.73	-1.99	-0.53	-6.32	-1.36	0.01	-1.74	26.25	3.2	1	1	0	13	193	1.11e+20	-334905	-13.23	0.56	196.55	201.82	2.3	0	4.61	85.1	3.38	142	46.2	3.74	2.88	7.61	16.32	1.37	-4.84	4.64	28.7	2	3	2	0
DMIP	Pure water	Pure methanol	gradient elution	7.33	39.0893	1.22725	1.84	-0.89	1.51	-0.84	-1.28	-6	-0.59	0	-2.72	23.5	1	1	3	0	12	172	1.11e+21	-332645	-25.27	0.81	195.56	198.01	2.3	0.01	9.99	128	57.4	269	243	9.75	3.19	7.16	17.5	-1.15	-4.24	10.15	56.7	2	2	4	0
Phe-p-1	Pure water	Pure methanol	gradient elution	10.16	57.5787	1.39631	2.02	-0.31	2.74	-1.81	-0.45	-6.71	-1.16	0.01	-1.69	26.09	2.3	1	2	1	13	152	1.11e+22	-335660	-12.87	0.73	209.56	213.73	2.33	0	3.22	91.3	4.88	123	51	3.16	1.78	7	14.9	1.32	-6	3.7	38.9	1	2	2	0
PhIP	Pure water	Pure methanol	gradient elution	10.02	56.664	1.55766	1.68	-1.18	0.48	-2.35	-1.09	-8.02	-1.74	0	-2.13	25.96	2.2	1	3	1	17	264	1.11e+28	-453005	-27.08	0.93	254.21	269.18	2.43	0	10.11	144	42.9	263	195	8.87	3.5	6.32	15.87	-0.61	-4.74	10.22	56.7	2	3	4	0
7,8-DiMeIQx	Pure water	Pure methanol	gradient elution	9	50	1.06585	1.75	-1.14	0.84	-1.95	-1.21	-7.94	-1.36	0	-2.15	25.03	1.4	1	4	0	17	297	1.11e+29	-463843	-25.35	1.03	254.55	269.67	2.43	0.01	6.62	143	68.9	284	281	10.44	2.87	6.01	15.48	-1.09	-4.51	6.74	69.6	2	3	5	0
Sarcosine	Pure water	Pure methanol	gradient elution	0.82	1	-0.291497	0.12	1.04	4.28	1.7	-1.4	-3.36	1.14	0	-3.44	18.16	-2.8	2	3	2	6	52.8	1110000000000	-203238	-12.38	0.78	127.98	113.01	2.05	0	2.92	94.2	17.5	201	42.4	4.57	4.19	4.37	24.65	-2.74	-4.93	8.22	49.3	0	0	1	0
Creatinine	Pure water	Pure methanol	gradient elution	1.4	1	0.764823	1.38	-0.84	1.29	-0.34	-2.16	-4.06	0.18	0	-3.48	18.16	-1.8	1	1	0	8	151	111000000000000	-248681	-30.05	0.8	143.83	134.46	2.13	0	11.98	146	74.4	333	274	12.86	4.35	5.11	15.98	-5.3	-5.49	12.08	58.7	1	1	3	0
L-Dihydroorotic acid	Pure water	Pure methanol	gradient elution	4.12	18.1173	-1.63405	-1.34	-0.74	1.72	-0.39	-1.95	-4.41	-0.01	0	-3.24	20.56	-1.5	3	4	1	11	225	1.11e+16	-379565	-23.86	1.38	167.39	163.4	2.21	0.01	5.18	172	-17.2	327	-144	5.51	8.7	2.35	17.25	-6.68	-4.92	4.87	95.5	1	1	2	0
L-Carnosine	Pure water	Pure methanol	gradient elution	1.4	1	0.180298	0.15	-0.97	-0.26	0.06	-3.29	-6.89	0.18	0	-4.06	18.16	-4	4	5	6	16	259	1.11e+29	-499765	-38.44	1.62	256.29	270.05	2.43	0	12.99	233	51	527	223	14.27	9.82	9.18	20.43	-2.61	-2.2	9.07	121	1	1	4	0
Betaine	Pure water	Pure methanol	gradient elution	0.88	1	0.957233	1.05	-2.41	-0.47	0.22	-2.88	-4.36	1.14	0	-4.32	18.16	0.5	0	2	1	8	87.6	1.11e+18	-252565	-41.59	0.81	153.39	154.86	2.19	0	15.35	178	181	468	789	21.46	0.08	1.63	14.25	-9.97	-2.66	15.47	40.1	0	0	1	0
Cytosine	Pure water	Pure methanol	gradient elution	1.24	1	0.701562	1.25	-0.79	0.33	-1.16	-2.53	-3.85	-0.01	0	-3.42	18.16	-1.7	2	2	0	8	170	1110000000000	-247927	-34.38	0.87	136.73	126.12	2.1	0	12.89	167	25.9	432	122	12.95	9.67	6.77	18.33	-4	-2.61	13.02	67.5	1	1	3	0
Hypoxanthine	Pure water	Pure methanol	gradient elution	2.2	5.57333	0.0864778	0.45	-0.65	1.31	-1.16	-2.04	-4.15	-0.59	0	-3.06	18.8	-0.5	2	3	0	10	190	11100000000000	-305849	-25.27	0.97	150.2	143.93	2.16	0.01	2.51	159	5.76	351	-26.8	8.83	8.14	3.33	11.33	-6.92	-2.86	2.6	70.1	2	2	4	0
Xanthine	Pure water	Pure methanol	gradient elution	2.41	6.94533	-0.442066	-0.21	-0.57	1.37	-1.12	-2.01	-4.4	-0.59	0	-2.98	18.99	-0.7	3	3	0	11	217	111000000000000	-353097	-23.72	1.25	159.89	153.96	2.19	0.01	6.06	170	-15.1	367	-128	7.64	10.2	7.74	22.93	-2.99	-2.73	6.1	86.9	2	2	4	0
Guanine	Pure water	Pure methanol	gradient elution	2.2	5.57333	0.19355	0.53	-1.03	0.35	-1.62	-2.51	-4.57	-0.59	0	-3.17	18.8	-1.1	3	3	0	11	225	1110000000000000	-340610	-30.43	1.22	164.42	158.81	2.2	0.01	3.28	191	-7.34	441	-50.1	10.78	11.63	4.81	13.86	-5.99	-2.81	3.34	96.2	2	2	5	0
Uracil	Pure water	Pure methanol	gradient elution	1.49	1	-0.268903	-0.76	-0.14	2.33	-0.31	-1.67	-3.6	-0.01	0	-3.15	18.16	-1.1	2	2	0	8	161	111000000000	-260420	-21.07	0.9	132.41	121.21	2.08	0	6.46	134	3.97	267	-37	6.39	6.45	8.21	24.76	-2.54	-2.48	6.5	58.2	1	1	2	0
Adenine	Pure water	Pure methanol	gradient elution	4.11	18.052	1.04582	1.46	-0.94	0.65	-1.32	-1.96	-4.45	-0.59	0	-2.98	20.55	-0.1	2	4	0	10	127	111000000000000	-293365	-30.51	0.99	153.88	148.09	2.17	0	11.17	161	9.31	380	47.5	10.2	8.73	5.5	15	-4.52	-2.45	11.33	80.5	2	2	5	0
Cytidine	Pure water	Pure methanol	gradient elution	2	4.26667	-0.461905	-0.02	-1.09	-2.05	-1.51	-3.17	-6.49	-0.97	0	-3.23	18.61	-2.1	4	5	2	17	383	1.11e+29	-559442	-33.42	1.74	241.37	261.47	2.42	0.01	6.86	228	40.6	467	146	13.35	9.24	15.82	45.67	-2.4	-3.46	9.4	129	1	2	3	0
Inosine	Pure water	Pure methanol	gradient elution	4.17	18.444	-1.26705	-1.89	-1.81	-1.34	-2.31	-2.91	-7.2	-1.55	0	-2.92	20.6	-1.3	4	7	2	19	405	1.11e+30	-617361	-37.38	1.8	261.27	285.84	2.46	0.01	9.42	243	21.5	459	3.18	11.36	10.23	10.31	29.87	-2.75	-2.08	9.18	129	2	3	4	0
Xanthosine	Pure water	Pure methanol	gradient elution	2.55	7.86	-1.12264	-1.17	-1.33	-1.92	-1.81	-3.1	-7.03	-1.55	0	-3	19.12	-2.4	5	7	2	20	434	1.11e+31	-664603	-37.75	1.91	265.99	291.82	2.47	0.01	15.45	240	28.5	439	14	11	9.33	12.24	32.43	-2.45	-3.34	12.18	146	2	3	4	0
Guanosine	Pure water	Pure methanol	gradient elution	4.3	19.2933	-0.889387	-0.81	-2.13	-2.39	-2.68	-3.18	-7.66	-1.55	0	-2.97	20.72	-1.9	5	7	2	20	446	1.11e+32	-652123	-42.64	2.09	276.17	298.73	2.48	0.01	11.43	271	-5.63	543	-85.9	12.26	14.35	13.14	36.02	-2.86	-2.22	11.13	155	2	3	5	0
Uridine	Pure water	Pure methanol	gradient elution	1.21	1	-1.36042	-0.52	0.1	-0.25	-0.2	-2.3	-6.11	-0.97	0	-3.19	18.16	-2	4	6	2	17	371	1.11e+28	-571934	-25.98	1.71	235.87	256.94	2.41	0.01	5.57	194	28.6	328	37.3	8.29	6.3	11.64	34.25	-0.98	-1.56	4.28	119	1	2	2	0
Adenosine	Pure water	Pure methanol	gradient elution	5.28	25.696	-0.282673	1.04	-1.13	0.66	-1.84	-1.74	-7.3	-1.55	0	-2.12	21.62	-1.1	4	8	2	19	335	1.11e+31	-604889	-23.66	1.73	253.58	283.19	2.45	0.01	2.18	191	36.3	322	107	8.99	5.54	14.19	39.95	-0.74	-3.53	3.84	140	2	3	5	0
D-Pantothenic acid	0.1% formic acid water	0.1% formic acid methanol	gradient elution	5.34	26.088	-1.10772	-0.57	-1.17	1.6	0.36	-2.31	-7.14	1.14	0	-3.39	21.7	-1.1	4	5	6	15	239	1.11e+31	-492236	-26.02	1.56	247.96	269.32	2.43	0	7.46	186	7.26	354	-39.4	8.13	8.95	6.22	23.15	-1.05	-7.18	4.69	107	0	0	1	0
Niacinamide	0.1% formic acid water	0.1% formic acid methanol	gradient elution	2.18	5.44267	0.786014	0.28	0.24	3.02	0.24	-1.34	-4.4	-0.01	0	-2.97	18.81	-0.4	1	2	1	9	114	111000000000000	-261773	-16.8	0.79	152.74	146.35	2.17	0	2.95	112	27.7	215	95.8	7.01	3.68	5.08	12.91	-3.24	-5.1	4.94	56	1	1	2	0
Pyridoxal	0.1% formic acid water	0.1% formic acid methanol	gradient elution	1.62	1.784	0.456235	0.12	1.19	2.47	0.93	-1.68	-5.09	-0.01	0	-3.13	18.29	0	2	4	2	12	162	1.11e+20	-370806	-16.87	1.08	190.02	193.09	2.29	0.01	3.53	121	8.31	226	-19.7	4.94	5.51	5.04	18.08	-1.4	-2.71	3.58	70.4	1	1	1	0
Biotin	0.1% formic acid water	0.1% formic acid methanol	gradient elution	7.18	38.1093	-0.804878	-0.5	-1.5	0.62	-0.95	-1.78	-8.2	-0.4	0	-3.05	23.38	0.3	3	4	5	16	298	1.11e+31	-705617	-29.67	1.27	265.94	285.19	2.46	0	8.59	187	46.4	337	92.1	9.56	6.53	5.1	24.78	-2.78	-2.77	9.65	104	1	2	2	1
Pyridoxine	0.1% formic acid water	0.1% formic acid methanol	gradient elution	2.2	5.57333	0.971637	0.74	0.26	1.77	0.18	-1.93	-5.36	-0.01	0	-3.08	18.82	-0.8	3	4	2	12	142	1.11e+22	-371565	-22.39	1.06	195.11	198.18	2.3	0	9.44	137	11.5	264	32	6.46	6.06	11.25	32	0.01	-3.22	2.9	73.6	1	1	1	0
Pyridoxamine	0.1% formic acid water	0.1% formic acid methanol	gradient elution	0.85	1	0.904908	0.47	0.77	2.14	0.53	-2.14	-5.45	-0.01	0	-3.21	18.18	-1	3	4	2	12	143	1.11e+23	-359090	-19.85	1.23	199.15	205.79	2.31	0.01	2.37	144	49.5	321	233	9.73	4.96	8.51	18.04	-0.23	-3.37	4.35	79.4	1	1	2	0
Thiamine	0.1% formic acid water	0.1% formic acid methanol	gradient elution	0.91	1	0.130874	0.14	0	0	0.71	-2.02	-8.57	-0.97	0	-4.15	18.18	0	2	6	4	19	269	1.11e+34	-727954	-65.42	1.49	291.55	320.17	2.51	-0.99	0	200	-71.2	335	-70.9	6.56	7.95	14.5	36.27	1.75	-2.99	10.15	104	2	2	4	1
Nicotinic acid	0.1% formic acid water	0.1% formic acid methanol	gradient elution	1.67	2.11067	0.19012	0.3	1.32	3.56	0.9	-1.26	-3.96	-0.01	0	-2.95	18.34	0.4	1	3	1	9	114	11100000000000	-274248	-12.08	0.77	149.15	142	2.15	0	0.88	92.9	1.16	177	-39.1	3.37	4.37	3.73	20.67	-2.73	-2.8	3.67	50.2	1	1	1	0
Glycine	0.1% formic acid water	0.1% formic acid methanol	gradient elution	0.79	1	-0.357987	-0.75	0.42	4.08	1.18	-1.56	-2.67	1.14	0	-3.39	18.18	-3.2	2	3	1	5	42.9	1111111111	-178568	-12.73	0.91	106.87	90.66	1.96	0	1.77	108	19.8	231	83.2	5.48	4.2	6.42	14.8	-1.74	-5.51	8.14	63.3	0	0	1	0
Alanine	0.1% formic acid water	0.1% formic acid methanol	gradient elution	0.81	1	-0.20995	-0.22	0.84	3.79	1.54	-1.5	-3.22	1.14	0	-3.4	18.18	-3	2	3	1	6	61.8	1110000000000	-203245	-12.07	0.88	123.86	112.49	2.05	0	1.93	103	20.6	223	81.1	5.25	4.15	6.92	15.51	-0.69	-4.07	2.88	63.3	0	0	1	0
Leucine	0.1% formic acid water	0.1% formic acid methanol	gradient elution	2.62	8.31733	0.07693	0.19	1.25	3.98	1.96	-1.25	-5.03	1.14	0	-3.25	19.21	-1.5	2	3	3	9	101	1.11e+21	-277279	-11.49	0.91	176.64	178.51	2.25	0	1.75	97.3	10	188	15.9	4.1	4.03	4.32	23.12	-1.46	-4.42	4.6	63.3	0	0	1	0
Isoleucine	0.1% formic acid water	0.1% formic acid methanol	gradient elution	2.42	7.01067	0.179586	0.17	1.36	3.99	2.03	-1.22	-4.97	1.14	0	-3.26	19.03	-1.7	2	3	3	9	103	1.11e+21	-277278	-11.39	0.9	174.76	177.8	2.25	0	1.86	95.2	4.07	178	-13.2	3.66	4.06	5.29	24.73	-0.48	-4.81	8.21	63.3	0	0	1	0
Valine	0.1% formic acid water	0.1% formic acid methanol	gradient elution	1.26	1	0.434823	0.06	1.05	3.48	2.26	-0.95	-4.35	1.14	0	-3.56	18.18	-2.3	2	3	2	8	90.4	1.11e+18	-252603	-16.64	0.58	154.87	154.22	2.19	0	7.95	86.9	30.2	126	74.6	3.87	1.16	5.48	13.49	-1.89	-5.23	8.12	63.3	0	0	1	0
Proline	0.1% formic acid water	0.1% formic acid methanol	gradient elution	0.96	1	0.0988808	0.3	1.15	3.62	0.95	-1.39	-4	0.18	0	-3.11	18.18	-2.5	2	3	1	8	103	1.11e+16	-251835	-13.13	0.77	147.6	142.26	2.15	0	3.61	94.9	18	192	36.7	4.47	4	3.51	21.36	-3.35	-4.13	3.48	49.3	1	1	1	0
Phenylalanine	0.1% formic acid water	0.1% formic acid methanol	gradient elution	4.62	21.384	0.317445	0.25	0	2.97	0.25	-1.21	-5.88	-0.01	0	-2.75	21.04	-1.5	2	3	3	12	153	1.11e+22	-348280	-15.74	1.01	200.74	208.03	2.32	0	2.66	122	9.49	216	30.8	4.48	4.38	4.16	22.91	-1.94	-2.63	7.78	63.3	0	1	1	0
Methionine	0.1% formic acid water	0.1% formic acid methanol	gradient elution	1.5	1	-0.280787	-0.03	1.23	3.26	2.07	-1.52	-5.31	1.14	0	-3.62	18.18	-1.9	2	4	4	9	97	1.11e+19	-502501	-15.83	1.08	186.45	185.96	2.27	0.01	4.25	126	19.1	229	42.1	4.86	4.41	4.94	22.93	-1.51	-3.09	4.05	88.6	0	0	1	1
Tryptophan	0.1% formic acid water	0.1% formic acid methanol	gradient elution	5.75	28.7667	-0.119388	-0.06	-0.77	1.74	-0.71	-1.35	-6.96	-0.59	0	-2.59	22.07	-1.1	3	3	3	15	245	1.11e+26	-430876	-21.02	1.24	233.33	250.05	2.4	0	5.34	153	-10.6	271	-20.2	4.73	6.7	4.11	22.25	-1.98	-4.08	5.74	79.1	1	2	2	0
Serine	0.1% formic acid water	0.1% formic acid methanol	gradient elution	0.79	1	-0.188294	-0.29	0.59	2.82	1.41	-1.57	-3.34	1.14	0	-3.45	18.18	-3.1	3	4	2	7	72.6	11100000000000	-250467	-14.94	1.06	132.32	122.02	2.09	0	3.06	118	4.07	216	-33.2	4.49	4.85	3.58	19.55	-4.08	-3.26	0.99	83.6	0	0	1	0
Glutamine	0.1% formic acid water	0.1% formic acid methanol	gradient elution	0.82	1	-0.522067	-0.25	-0.23	1.53	0.89	-2.43	-4.79	1.14	0	-3.87	18.18	-3.1	3	4	4	10	146	1.11e+19	-333835	-24.89	1.35	180.5	176.05	2.25	0	6.95	174	25	351	64	9.61	7.18	5.6	22.19	-3.61	-5.52	7.53	106	0	0	2	0
Threonine	0.1% formic acid water	0.1% formic acid methanol	gradient elution	0.84	1	-0.210216	-0.22	1	3.49	1.69	-1.63	-3.86	1.14	0	-3.45	18.18	-2.9	3	4	2	8	93.3	1.11e+16	-275147	-14.56	1.14	149.43	144.38	2.16	0.01	4	119	6.4	228	-10.9	5.24	4.98	2.45	17.53	-4.59	-5.42	3.68	83.6	0	0	1	0
Cysteine	0.1% formic acid water	0.1% formic acid methanol	gradient elution	0.88	1	-0.527554	-0.51	1.01	3.62	1.64	-1.19	-4.18	1.14	0	-3.3	18.18	-2.5	3	4	2	7	75.3	11100000000000	-453148	-13.45	1	147.18	141.36	2.15	0.01	3.06	108	-15.6	173	-97.6	1.79	4.69	5.27	20.11	-1.25	-3.34	5	64.3	0	0	1	1
Asparagine	0.1% formic acid water	0.1% formic acid methanol	gradient elution	0.8	1	-0.565422	-0.35	-0.51	2.07	0.57	-2.46	-4.16	1.14	0	-3.86	18.18	-3.4	3	4	3	9	134	1.11e+16	-309157	-24.85	1.33	160.84	155.26	2.19	0	3.88	177	14.7	352	34.5	9.05	7.57	3.77	19.29	-6.05	-4.96	6.4	106	0	0	2	0
Glutamic acid	0.1% formic acid water	0.1% formic acid methanol	gradient elution	0.85	1	-0.476999	-0.29	-0.05	2.12	1.4	-1.87	-4.41	1.14	0	-3.93	18.18	-3.7	3	5	4	10	145	1.11e+18	-346311	-25.1	1.06	172.73	167.41	2.22	0	8.05	150	9.3	247	-26.7	4.8	5.32	4.16	20.54	-4.48	-4.16	4.84	101	0	0	1	1
Lysine	0.1% formic acid water	0.1% formic acid methanol	gradient elution	0.71	1	-0.0367462	-0.3	0.5	2.83	2.08	-1.6	-5.39	1.14	0	-3.89	18.18	-3	3	4	5	10	106	1.11e+23	-312026	-21.17	0.86	191.1	191.01	2.28	0	5.99	127	75.3	255	325	8.64	1.15	8.95	18.74	-1	-1.73	0.96	89.3	0	0	2	0
Arginine	0.1% formic acid water	0.1% formic acid methanol	gradient elution	0.75	1	0.0528077	0.16	-0.44	1.47	1.17	-2.22	-6.02	1.14	0	-3.97	18.18	-4.2	4	4	5	12	176	1.11e+25	-380778	-28.48	1.38	214.93	214.24	2.33	0	9.11	182	56.4	339	241	10.62	3.9	10.66	22.26	-2.7	-2.93	1.97	128	0	0	4	0
Histidine	0.1% formic acid water	0.1% formic acid methanol	gradient elution	0.73	1	0.447485	-0.01	-0.54	1.3	0.28	-1.91	-4.93	0.18	0	-3.62	18.18	-3.2	3	4	3	11	151	1.11e+19	-344509	-27.47	0.98	180.91	181.77	2.26	0	5.04	160	36.7	296	139	8.38	4.38	5.7	14.6	-3.9	-4.52	8.26	92	1	1	3	0
Citrulline	0.1% formic acid water	0.1% formic acid methanol	gradient elution	0.87	1	-0.0465512	-0.39	-0.54	1.3	0.87	-2.92	-5.79	1.14	0	-4.15	18.18	-4.3	4	4	5	12	171	1.11e+24	-393268	-29.64	1.53	214.73	215.15	2.33	0	7.6	204	40.5	433	151	12.42	8.36	5.05	24.14	-4.38	-3.03	2.31	118	0	0	3	0
Taurine	0.1% formic acid water	0.1% formic acid methanol	gradient elution	0.81	1	-0.927389	-0.86	0.11	3.08	1.25	-1.79	-3.57	1.14	0	-3.67	18.18	-4.1	2	4	2	7	120	11100000000000	-476406	-18.56	1.09	143.51	133.49	2.13	0.01	3.57	138	-7.89	285	-71.8	4.16	6.16	-2.47	10.55	-10.36	-3.86	3.47	88.8	0	0	1	1
Aspartic acid	0.1% formic acid water	0.1% formic acid methanol	gradient elution	0.82	1	-1.22201	-0.44	-0.2	2.73	0.87	-2.4	-3.7	1.14	0	-3.77	18.18	-2.8	3	5	3	9	133	1110000000000000	-321630	-21.27	1.32	154.67	151	2.18	0.01	2.79	162	-13.7	337	-89.9	5.61	8.84	3.86	21.36	-4.48	-3.1	8.53	101	0	0	1	0
Tyrosine	0.1% formic acid water	0.1% formic acid methanol	gradient elution	4.3	19.2933	-0.0139431	0.14	-0.58	2.22	-0.16	-1.86	-5.95	-0.01	0	-3.01	20.75	-2.3	3	4	3	13	176	1.11e+23	-395507	-20.45	1.27	210.41	219.03	2.34	0	4.34	158	-11.2	301	-58.2	5.35	7.81	4.18	23.28	-2.58	-2.6	8.84	83.6	0	1	1	0
Hypotaurine	0.1% formic acid water	0.1% formic acid methanol	gradient elution	0.82	1	-0.435986	-0.48	0.02	3.16	0.84	-1.88	-3.74	1.14	0	-3.53	18.18	-1.5	2	4	2	6	55.5	1110000000000	-429187	-19.14	0.95	136.46	125.99	2.1	0	5.56	129	43.8	272	164	8.05	3.84	8.34	19	-1.9	-2.55	5.19	82.5	0	0	1	1
L-Hydroxyproline	0.1% formic acid water	0.1% formic acid methanol	gradient elution	0.83	1	-0.121583	-0.07	0.21	2.82	0.21	-2.18	-4.04	0.18	0	-3.31	18.18	-3.3	3	4	1	9	125	1.11e+17	-299059	-18.75	1.12	155.95	154.27	2.19	0	3.05	140	34.4	301	118	8.1	5.75	7.9	18.5	-1.19	-2.19	3.72	69.6	1	1	1	0
Spermidine	0.1% formic acid water	0.1% formic acid methanol	gradient elution	0.62	1	-0.45165	0.47	1.49	3.54	2.68	-1.89	-6.45	1.14	0	-3.93	18.18	-1	3	3	7	10	56.8	1.11e+28	-277732	-15.74	0.99	217.83	216.4	2.34	0	1.9	124	142	373	727	14.62	0.09	9.46	19.87	0.54	-2.29	2.35	64.1	0	0	3	0
N-omiga-acetylhistamine	0.1% formic acid water	0.1% formic acid methanol	gradient elution	1.01	1	0.854593	0.79	-0.11	2.28	0.61	-2.03	-5.63	0.18	0	-3.64	18.18	-0.4	2	2	3	11	138	1.11e+21	-321960	-23.57	0.83	195.51	194.44	2.29	0	4.66	148	58.4	320	214	11.2	4.88	6.06	14.64	-2.8	-2.61	4.77	57.8	1	1	3	0
L-pyroglutamic acid	0.1% formic acid water	0.1% formic acid methanol	gradient elution	0.81	1	-0.479485	-0.52	0.03	2.43	0.27	-1.92	-3.91	0.18	0	-3.39	18.18	-0.8	2	3	1	9	154	1110000000000000	-298326	-20.95	0.96	151.34	146.44	2.17	0	7.17	137	11.3	267	-26.3	6.36	6.48	3.66	21.17	-4.87	-2.3	6.22	66.4	1	1	1	0
Tyramine	0.1% formic acid water	0.1% formic acid methanol	gradient elution	2.73	9.036	0.290392	0	0.76	3.22	0.64	-1.3	-5.39	-0.01	0	-2.94	19.31	1.1	2	2	2	10	87.3	1.11e+20	-277120	-13.98	0.82	183.62	181.83	2.26	0	2.6	106	27.2	227	168	5.88	3.52	8.82	18.57	0.95	-2.63	3.17	46.2	0	1	1	0
Histamine	0.1% formic acid water	0.1% formic acid methanol	gradient elution	0.66	1	0.414489	0.69	0.15	2.94	0.52	-1.69	-4.48	0.18	0	-3.32	18.18	-0.7	2	2	2	8	64.7	1.11e+16	-226118	-18.32	0.8	155.19	146.49	2.17	0	4.89	122	68.6	307	360	10.5	2.98	8.7	18.47	-1.26	-2.85	4.92	54.7	1	1	3	0
AaC	0.1% formic acid water	0.1% formic acid methanol	gradient elution	8.33	45.6227	0.901519	0.83	-0.51	2.2	-1.81	-0.59	-6.66	-1.36	0.01	-1.77	24.44	2.6	2	2	0	14	219	1.11e+22	-369670	-14.85	0.86	210.7	216.51	2.34	0	2.51	108	-19	154	-31.5	2.67	3.95	5.78	12.59	0.02	-2.83	2.59	54.7	2	3	3	0
IQx	0.1% formic acid water	0.1% formic acid methanol	gradient elution	5.76	28.832	0.968903	0.76	-0.84	0.96	-1.44	-1.36	-6.6	-1.36	0	-2.34	22.08	0.6	1	4	0	15	246	1.11e+23	-414479	-25.04	0.93	218.25	227.81	2.36	0.01	8.8	141	56.1	274	235	9.64	3.08	5.71	14.84	-2.23	-2.75	8.88	69.6	2	3	5	0
MeAaC	0.1% formic acid water	0.1% formic acid methanol	gradient elution	9.17	51.1107	1.17645	0.95	-0.5	2.3	-1.96	-0.52	-7.26	-1.36	0.01	-1.63	25.21	2.9	2	2	0	15	243	1.11e+25	-394350	-14.53	0.87	227.94	238.72	2.38	0	2.95	104	-11.8	144	-14.1	2.67	3.43	5.81	12.56	0.58	-2.26	3.04	54.7	2	3	3	0
8-MeIQx	0.1% formic acid water	0.1% formic acid methanol	gradient elution	6.57	34.124	1.09451	0.77	-0.94	0.92	-1.56	-1.33	-7.28	-1.36	0	-2.27	22.83	1	1	4	0	16	271	1.11e+26	-439162	-25.13	0.98	237.6	249.06	2.4	0.01	7.72	142	63.8	281	265	10.06	2.97	5.88	15.22	-1.59	-1.95	7.78	69.6	2	3	5	0
MeIQ	0.1% formic acid water	0.1% formic acid methanol	gradient elution	5.76	28.832	1.04116	0.83	-0.48	1.35	-1.41	-1.02	-7.32	-1.36	0	-1.98	22.08	2	1	3	0	16	270	1.11e+27	-429091	-21.18	0.93	236.91	253.92	2.4	0	9.17	124	38.5	216	166	7.22	2.74	7.22	16.13	0.27	-4.33	9.28	56.7	2	3	4	0
IQ[4,5-b]	0.1% formic acid water	0.1% formic acid methanol	gradient elution	6.61	34.3853	0.95213	0.78	-0.95	0.7	-1.6	-1.26	-6.89	-1.36	0	-2.36	22.86	1.7	1	3	0	15	245	1.11e+24	-404413	-27.45	0.9	223.43	232.81	2.37	0	10.84	139	39.2	269	182	8.87	4.02	6.83	16.69	-0.82	-4.58	11	56.7	2	3	4	0
Harman	0.1% formic acid water	0.1% formic acid methanol	gradient elution	7.43	39.7427	1.31729	1.06	0.04	2.69	-1.58	-0.53	-6.83	-1.36	0.01	-1.65	23.61	3.6	1	1	0	14	216	1.11e+23	-359587	-12.73	0.59	214.44	223.28	2.35	0	4.55	81.6	10	132	63.3	3.7	2.33	7.72	16.34	1.94	-4.95	4.58	28.7	2	3	2	0
IQ	0.1% formic acid water	0.1% formic acid methanol	gradient elution	5.4	26.48	1.06433	0.89	-0.41	1.43	-1.36	-1.02	-6.82	-1.36	0	-2.04	21.75	1.5	1	3	0	15	245	1.11e+24	-404413	-20.86	0.92	222.22	233.02	2.37	0	8.83	123	32.7	213	148	6.9	2.78	7	15.75	-0.15	-2.69	8.95	56.7	2	3	4	0
Norharman	0.1% formic acid water	0.1% formic acid methanol	gradient elution	6.96	36.672	1.14308	1.02	-0.06	2.73	-1.48	-0.6	-6.21	-1.36	0.01	-1.82	23.18	3.2	1	1	0	13	193	1.11e+20	-334905	-13.23	0.56	196.55	201.82	2.3	0	4.61	85.1	3.38	142	46.2	3.74	2.88	7.61	16.32	1.37	-4.84	4.64	28.7	2	3	2	0
DMIP	0.1% formic acid water	0.1% formic acid methanol	gradient elution	5.1	24.52	1.20718	0.94	-0.73	1.51	-0.6	-1.41	-5.91	-0.59	0	-2.76	21.48	1	1	3	0	12	172	1.11e+21	-332645	-25.27	0.81	195.56	198.01	2.3	0.01	9.99	128	57.4	269	243	9.75	3.19	7.16	17.5	-1.15	-4.24	10.15	56.7	2	2	4	0
Phe-p-1	0.1% formic acid water	0.1% formic acid methanol	gradient elution	7.18	38.1093	1.34836	1.05	-0.01	2.74	-1.31	-0.51	-6.62	-1.16	0.01	-1.78	23.38	2.3	1	2	1	13	152	1.11e+22	-335660	-12.87	0.73	209.56	213.73	2.33	0	3.22	91.3	4.88	123	51	3.16	1.78	7	14.9	1.32	-6	3.7	38.9	1	2	2	0
PhIP	0.1% formic acid water	0.1% formic acid methanol	gradient elution	7.86	42.552	1.53125	0.83	-1.1	0.48	-2.09	-1.18	-7.94	-1.74	0	-2.14	24.01	2.2	1	3	1	17	264	1.11e+28	-453005	-27.08	0.93	254.21	269.18	2.43	0	10.11	144	42.9	263	195	8.87	3.5	6.32	15.87	-0.61	-4.74	10.22	56.7	2	3	4	0
7,8-DiMeIQx	0.1% formic acid water	0.1% formic acid methanol	gradient elution	7.25	38.5667	1.03335	0.86	-1.03	0.84	-1.7	-1.3	-7.87	-1.36	0	-2.17	23.45	1.4	1	4	0	17	297	1.11e+29	-463843	-25.35	1.03	254.55	269.67	2.43	0.01	6.62	143	68.9	284	281	10.44	2.87	6.01	15.48	-1.09	-4.51	6.74	69.6	2	3	5	0
Sarcosine	0.1% formic acid water	0.1% formic acid methanol	gradient elution	0.81	1	-0.294982	-0.22	1.03	4.28	1.7	-1.4	-3.36	1.14	0	-3.44	18.18	-2.8	2	3	2	6	52.8	1110000000000	-203238	-12.38	0.78	127.98	113.01	2.05	0	2.92	94.2	17.5	201	42.4	4.57	4.19	4.37	24.65	-2.74	-4.93	8.22	49.3	0	0	1	0
Creatinine	0.1% formic acid water	0.1% formic acid methanol	gradient elution	0.89	1	0.761339	0.27	-0.85	1.29	-0.34	-2.16	-4.06	0.18	0	-3.48	18.18	-1.8	1	1	0	8	151	111000000000000	-248681	-30.05	0.8	143.83	134.46	2.13	0	11.98	146	74.4	333	274	12.86	4.35	5.11	15.98	-5.3	-5.49	12.08	58.7	1	1	3	0
L-Dihydroorotic acid	0.1% formic acid water	0.1% formic acid methanol	gradient elution	1.01	1	-1.51984	-1.33	-0.28	1.72	-0.17	-2.23	-4.13	-0.01	0	-3.4	18.18	-1.5	3	4	1	11	225	1.11e+16	-379565	-23.86	1.38	167.39	163.4	2.21	0.01	5.18	172	-17.2	327	-144	5.51	8.7	2.35	17.25	-6.68	-4.92	4.87	95.5	1	1	2	0
L-Carnosine	0.1% formic acid water	0.1% formic acid methanol	gradient elution	0.75	1	0.185345	-0.78	-0.98	-0.26	0.05	-3.29	-6.89	0.18	0	-4.05	18.18	-4	4	5	6	16	259	1.11e+29	-499765	-38.44	1.62	256.29	270.05	2.43	0	12.99	233	51	527	223	14.27	9.82	9.18	20.43	-2.61	-2.2	9.07	121	1	1	4	0
Uric acid	0.1% formic acid water	0.1% formic acid methanol	gradient elution	1.88	3.48267	-1.64022	-0.91	-0.98	-0.06	-1.76	-2.7	-4.59	-0.59	0	-3.31	18.53	-1.9	4	3	0	12	332	1110000000000000	-400333	-32.33	1.46	170.49	165.06	2.22	0.01	4.89	213	-41.9	498	-282	9.31	15.52	5.46	20.01	-5.65	-2.96	4.55	99.3	2	2	4	0
Betaine	0.1% formic acid water	0.1% formic acid methanol	gradient elution	0.87	1	0.960687	0.38	-2.41	-0.47	0.21	-2.88	-4.36	1.14	0	-4.32	18.18	0.5	0	2	1	8	87.6	1.11e+18	-252565	-41.59	0.81	153.39	154.86	2.19	0	15.35	178	181	468	789	21.46	0.08	1.63	14.25	-9.97	-2.66	15.47	40.1	0	0	1	0
Cytosine	0.1% formic acid water	0.1% formic acid methanol	gradient elution	0.9	1	0.701246	0.25	-0.79	0.33	-1.16	-2.53	-3.85	-0.01	0	-3.42	18.18	-1.7	2	2	0	8	170	1110000000000	-247927	-34.38	0.87	136.73	126.12	2.1	0	12.89	167	25.9	432	122	12.95	9.67	6.77	18.33	-4	-2.61	13.02	67.5	1	1	3	0
Hypoxanthine	0.1% formic acid water	0.1% formic acid methanol	gradient elution	2.08	4.78933	0.0887553	-0.06	-0.64	1.31	-1.16	-2.06	-4.14	-0.59	0	-3.06	18.71	-0.5	2	3	0	10	190	11100000000000	-305849	-25.27	0.97	150.2	143.93	2.16	0.01	2.51	159	5.76	351	-26.8	8.83	8.14	3.33	11.33	-6.92	-2.86	2.6	70.1	2	2	4	0
Xanthine	0.1% formic acid water	0.1% formic acid methanol	gradient elution	2.5	7.53333	-0.439856	-0.37	-0.59	1.37	-1.12	-2	-4.4	-0.59	0	-2.97	19.1	-0.7	3	3	0	11	217	111000000000000	-353097	-23.72	1.25	159.89	153.96	2.19	0.01	6.06	170	-15.1	367	-128	7.64	10.2	7.74	22.93	-2.99	-2.73	6.1	86.9	2	2	4	0
Guanine	0.1% formic acid water	0.1% formic acid methanol	gradient elution	1.52	1.13067	0.2079	0.06	-0.96	0.35	-1.63	-2.61	-4.52	-0.59	0	-3.19	18.2	-1.1	3	3	0	11	225	1110000000000000	-340610	-30.43	1.22	164.42	158.81	2.2	0.01	3.28	191	-7.34	441	-50.1	10.78	11.63	4.81	13.86	-5.99	-2.81	3.34	96.2	2	2	5	0
Uracil	0.1% formic acid water	0.1% formic acid methanol	gradient elution	1.49	1	-0.26922	-0.62	-0.14	2.33	-0.31	-1.67	-3.6	-0.01	0	-3.15	18.18	-1.1	2	2	0	8	161	111000000000	-260420	-21.07	0.9	132.41	121.21	2.08	0	6.46	134	3.97	267	-37	6.39	6.45	8.21	24.76	-2.54	-2.48	6.5	58.2	1	1	2	0
Adenine	0.1% formic acid water	0.1% formic acid methanol	gradient elution	1.45	1	1.07344	0.52	-0.75	0.65	-1.26	-2.24	-4.3	-0.59	0	-3.03	18.18	-0.1	2	4	0	10	127	111000000000000	-293365	-30.51	0.99	153.88	148.09	2.17	0	11.17	161	9.31	380	47.5	10.2	8.73	5.5	15	-4.52	-2.45	11.33	80.5	2	2	5	0
Beta-Thymidine	0.1% formic acid water	0.1% formic acid methanol	gradient elution	4.95	23.54	-1.22375	-1.71	-0.98	1.16	-1.1	-1.84	-7.11	-0.97	0	-2.68	21.34	-1.2	3	5	2	17	381	1.11e+30	-549390	-24.52	1.42	246.36	266.66	2.43	0.01	4.01	176	50.1	310	96.6	9.28	5.39	15.53	45.1	-0.93	-3.96	6.43	99.1	1	2	2	0
Cytidine	0.1% formic acid water	0.1% formic acid methanol	gradient elution	1.06	1	-0.459468	-0.7	-0.86	-2.05	-1.38	-3.27	-6.41	-0.97	0	-3.32	18.18	-2.1	4	5	2	17	383	1.11e+29	-559442	-33.42	1.74	241.37	261.47	2.42	0.01	6.86	228	40.6	467	146	13.35	9.24	15.82	45.67	-2.4	-3.46	9.4	129	1	2	3	0
Inosine	0.1% formic acid water	0.1% formic acid methanol	gradient elution	4.18	18.5093	-1.26769	-1.24	-1.81	-1.34	-2.31	-2.91	-7.2	-1.55	0	-2.92	20.64	-1.3	4	7	2	19	405	1.11e+30	-617361	-37.38	1.8	261.27	285.84	2.46	0.01	9.42	243	21.5	459	3.18	11.36	10.23	10.31	29.87	-2.75	-2.08	9.18	129	2	3	4	0
Xanthosine	0.1% formic acid water	0.1% formic acid methanol	gradient elution	4.65	21.58	-1.14919	-1.15	-1.76	-1.92	-2.15	-2.78	-7.3	-1.55	0	-2.85	21.07	-2.4	5	7	2	20	434	1.11e+31	-664603	-37.75	1.91	265.99	291.82	2.47	0.01	15.45	240	28.5	439	14	11	9.33	12.24	32.43	-2.45	-3.34	12.18	146	2	3	4	0
Guanosine	0.1% formic acid water	0.1% formic acid methanol	gradient elution	4.21	18.7053	-0.888996	-0.56	-2.13	-2.39	-2.67	-3.19	-7.65	-1.55	0	-2.97	20.66	-1.9	5	7	2	20	446	1.11e+32	-652123	-42.64	2.09	276.17	298.73	2.48	0.01	11.43	271	-5.63	543	-85.9	12.26	14.35	13.14	36.02	-2.86	-2.22	11.13	155	2	3	5	0
Adenosine	0.1% formic acid water	0.1% formic acid methanol	gradient elution	4.23	18.836	-0.315214	0.13	-0.92	0.66	-1.6	-1.84	-7.22	-1.55	0	-2.2	20.68	-1.1	4	8	2	19	335	1.11e+31	-604889	-23.66	1.73	253.58	283.19	2.45	0.01	2.18	191	36.3	322	107	8.99	5.54	14.19	39.95	-0.74	-3.53	3.84	140	2	3	5	0

## Sheet: RF-C
Compounds	Mobile phase A	Mobile phase B	Elution conditions	Peak time	B%	predicted_values	true_values	ln(gamma)	log(pv)	Total mean interaction energy in the mix (H_int)	H-Bond interaction energy in the mix (H_HB)	VdW interaction energy in the mix (H_vdW)	Gas liquid transition energy in the mix (H_glt)	w_RS	log10(S_RS)	Solvent_MolWeight	XLogP3	Hydrogen Bond Donor Count	Hydrogen Bond Acceptor Count	Rotatable Bond Count	Heavy Atom Count	Complexity	Atomic weights	E_gas	E_diel	Averaging corr dE	Area	Volume	Log(MV)	Total COSMO charge	Dipole moment t_value	Sigma2	Sigma3	Sigma4	Sigma5	H-bond moment (accept)	H-bond moment (donor)	PKA(25,H2O)	PKA(25,MeCN)	logD	WANS*10^5	丨d丨(dipole moment)	Polar Surface Area	Nitrogen Heterocycle Count	Ring Count	Nitrogen Count	Sulfur Count
D-Pantothenic acid	Pure water	Pure methanol	gradient elution	1.7	2.30667	-0.849995	-0.9	0.19	1.6	1.49	-2.76	-6.72	1.14	0	-3.93	18.34	-1.1	4	5	6	15	239	1.11e+31	-492236	-26.02	1.56	247.96	269.32	2.43	0	7.46	186	7.26	354	-39.4	8.13	8.95	6.22	23.15	-1.05	-7.18	4.69	107	0	0	1	0
Niacinamide	Pure water	Pure methanol	gradient elution	4.21	18.7053	0.425109	0.76	-0.2	3.02	-0.07	-1.19	-4.53	-0.01	0	-2.81	20.64	-0.4	1	2	1	9	114	111000000000000	-261773	-16.8	0.79	152.74	146.35	2.17	0	2.95	112	27.7	215	95.8	7.01	3.68	5.08	12.91	-3.24	-5.1	4.94	56	1	1	2	0
Pyridoxal	Pure water	Pure methanol	gradient elution	3.4	13.4133	0.541039	1.03	0.32	2.47	0.24	-1.52	-5.31	-0.01	0	-2.79	19.9	0	2	4	2	12	162	1.11e+20	-370806	-16.87	1.08	190.02	193.09	2.29	0.01	3.53	121	8.31	226	-19.7	4.94	5.51	5.04	18.08	-1.4	-2.71	3.58	70.4	1	1	1	0
Biotin	Pure water	Pure methanol	gradient elution	5.13	24.716	-0.064228	-1.01	-1.32	0.62	-0.66	-1.95	-8.07	-0.4	0	-3.1	21.48	0.3	3	4	5	16	298	1.11e+31	-705617	-29.67	1.27	265.94	285.19	2.46	0	8.59	187	46.4	337	92.1	9.56	6.53	5.1	24.78	-2.78	-2.77	9.65	104	1	2	2	1
Pyridoxine	Pure water	Pure methanol	gradient elution	4.51	20.6653	1.0515	1.55	-0.46	1.77	-0.41	-1.73	-5.58	-0.01	0	-2.81	20.91	-0.8	3	4	2	12	142	1.11e+22	-371565	-22.39	1.06	195.11	198.18	2.3	0	9.44	137	11.5	264	32	6.46	6.06	11.25	32	0.01	-3.22	2.9	73.6	1	1	1	0
Pyridoxamine	Pure water	Pure methanol	gradient elution	4.7	21.9067	0.870694	1.31	-0.41	2.14	-0.4	-1.81	-5.77	-0.01	0	-2.75	21.09	-1	3	4	2	12	143	1.11e+23	-359090	-19.85	1.23	199.15	205.79	2.31	0.01	2.37	144	49.5	321	233	9.73	4.96	8.51	18.04	-0.23	-3.37	4.35	79.4	1	1	2	0
Thiamine	Pure water	Pure methanol	gradient elution	7.5	40.2	0.665492	1.36	0	0	-0.75	-1.53	-9.18	-0.97	0	-3.29	23.65	0	2	6	4	19	269	1.11e+34	-727954	-65.42	1.49	291.55	320.17	2.51	-0.99	0	200	-71.2	335	-70.9	6.56	7.95	14.5	36.27	1.75	-2.99	10.15	104	2	2	4	1
Nicotinic acid	Pure water	Pure methanol	gradient elution	0.98	1	0.267716	0.68	1.42	3.56	0.98	-1.28	-3.94	-0.01	0	-2.99	18.16	0.4	1	3	1	9	114	11100000000000	-274248	-12.08	0.77	149.15	142	2.15	0	0.88	92.9	1.16	177	-39.1	3.37	4.37	3.73	20.67	-2.73	-2.8	3.67	50.2	1	1	1	0
Glycine	Pure water	Pure methanol	gradient elution	0.8	1	-0.117048	-0.68	0.42	4.08	1.18	-1.56	-2.67	1.14	0	-3.39	18.16	-3.2	2	3	1	5	42.9	1111111111	-178568	-12.73	0.91	106.87	90.66	1.96	0	1.77	108	19.8	231	83.2	5.48	4.2	6.42	14.8	-1.74	-5.51	8.14	63.3	0	0	1	0
Alanine	Pure water	Pure methanol	gradient elution	0.82	1	-0.139379	0.12	0.84	3.79	1.55	-1.5	-3.22	1.14	0	-3.4	18.16	-3	2	3	1	6	61.8	1110000000000	-203245	-12.07	0.88	123.86	112.49	2.05	0	1.93	103	20.6	223	81.1	5.25	4.15	6.92	15.51	-0.69	-4.07	2.88	63.3	0	0	1	0
Leucine	Pure water	Pure methanol	gradient elution	2.04	4.528	0.333859	0.61	1.58	3.98	2.22	-1.29	-4.97	1.14	0	-3.38	18.65	-1.5	2	3	3	9	101	1.11e+21	-277279	-11.49	0.91	176.64	178.51	2.25	0	1.75	97.3	10	188	15.9	4.1	4.03	4.32	23.12	-1.46	-4.42	4.6	63.3	0	0	1	0
Isoleucine	Pure water	Pure methanol	gradient elution	1.89	3.548	0.328891	0.5	1.68	3.99	2.28	-1.26	-4.91	1.14	0	-3.39	18.51	-1.7	2	3	3	9	103	1.11e+21	-277278	-11.39	0.9	174.76	177.8	2.25	0	1.86	95.2	4.07	178	-13.2	3.66	4.06	5.29	24.73	-0.48	-4.81	8.21	63.3	0	0	1	0
Valine	Pure water	Pure methanol	gradient elution	1.04	1	0.232465	0.43	1.05	3.48	2.27	-0.96	-4.35	1.14	0	-3.57	18.16	-2.3	2	3	2	8	90.4	1.11e+18	-252603	-16.64	0.58	154.87	154.22	2.19	0	7.95	86.9	30.2	126	74.6	3.87	1.16	5.48	13.49	-1.89	-5.23	8.12	63.3	0	0	1	0
Proline	Pure water	Pure methanol	gradient elution	0.96	1	0.333838	0.62	1.16	3.62	0.95	-1.39	-4	0.18	0	-3.11	18.16	-2.5	2	3	1	8	103	1.11e+16	-251835	-13.13	0.77	147.6	142.26	2.15	0	3.61	94.9	18	192	36.7	4.47	4	3.51	21.36	-3.35	-4.13	3.48	49.3	1	1	1	0
Phenylalanine	Pure water	Pure methanol	gradient elution	4.4	19.9467	0.200973	0.34	0.05	2.97	0.3	-1.22	-5.87	-0.01	0	-2.77	20.81	-1.5	2	3	3	12	153	1.11e+22	-348280	-15.74	1.01	200.74	208.03	2.32	0	2.66	122	9.49	216	30.8	4.48	4.38	4.16	22.91	-1.94	-2.63	7.78	63.3	0	1	1	0
Methionine	Pure water	Pure methanol	gradient elution	1.4	1	-0.0562981	0.24	1.24	3.26	2.08	-1.52	-5.31	1.14	0	-3.62	18.16	-1.9	2	4	4	9	97	1.11e+19	-502501	-15.83	1.08	186.45	185.96	2.27	0.01	4.25	126	19.1	229	42.1	4.86	4.41	4.94	22.93	-1.51	-3.09	4.05	88.6	0	0	1	1
Tryptophan	Pure water	Pure methanol	gradient elution	5.36	26.2187	-0.214925	-0.08	-0.71	1.74	-0.62	-1.37	-6.93	-0.59	0	-2.61	21.69	-1.1	3	3	3	15	245	1.11e+26	-430876	-21.02	1.24	233.33	250.05	2.4	0	5.34	153	-10.6	271	-20.2	4.73	6.7	4.11	22.25	-1.98	-4.08	5.74	79.1	1	2	2	0
Serine	Pure water	Pure methanol	gradient elution	0.8	1	-0.44062	-0.42	0.59	2.82	1.41	-1.57	-3.34	1.14	0	-3.45	18.16	-3.1	3	4	2	7	72.6	11100000000000	-250467	-14.94	1.06	132.32	122.02	2.09	0	3.06	118	4.07	216	-33.2	4.49	4.85	3.58	19.55	-4.08	-3.26	0.99	83.6	0	0	1	0
Glutamine	Pure water	Pure methanol	gradient elution	0.83	1	-0.481346	-0.02	-0.22	1.53	0.89	-2.44	-4.79	1.14	0	-3.87	18.16	-3.1	3	4	4	10	146	1.11e+19	-333835	-24.89	1.35	180.5	176.05	2.25	0	6.95	174	25	351	64	9.61	7.18	5.6	22.19	-3.61	-5.52	7.53	106	0	0	2	0
Threonine	Pure water	Pure methanol	gradient elution	0.83	1	-0.287171	-0.19	1	3.49	1.7	-1.63	-3.86	1.14	0	-3.45	18.16	-2.9	3	4	2	8	93.3	1.11e+16	-275147	-14.56	1.14	149.43	144.38	2.16	0.01	4	119	6.4	228	-10.9	5.24	4.98	2.45	17.53	-4.59	-5.42	3.68	83.6	0	0	1	0
Cysteine	Pure water	Pure methanol	gradient elution	0.87	1	-0.677028	-1.13	1.02	3.62	1.64	-1.19	-4.18	1.14	0	-3.3	18.16	-2.5	3	4	2	7	75.3	11100000000000	-453148	-13.45	1	147.18	141.36	2.15	0.01	3.06	108	-15.6	173	-97.6	1.79	4.69	5.27	20.11	-1.25	-3.34	5	64.3	0	0	1	1
Asparagine	Pure water	Pure methanol	gradient elution	0.81	1	-0.579775	-0.64	-0.51	2.07	0.57	-2.46	-4.16	1.14	0	-3.86	18.16	-3.4	3	4	3	9	134	1.11e+16	-309157	-24.85	1.33	160.84	155.26	2.19	0	3.88	177	14.7	352	34.5	9.05	7.57	3.77	19.29	-6.05	-4.96	6.4	106	0	0	2	0
Glutamic acid	Pure water	Pure methanol	gradient elution	0.6	1	-0.521944	-0.76	-0.05	2.12	1.4	-1.87	-4.41	1.14	0	-3.93	18.16	-3.7	3	5	4	10	145	1.11e+18	-346311	-25.1	1.06	172.73	167.41	2.22	0	8.05	150	9.3	247	-26.7	4.8	5.32	4.16	20.54	-4.48	-4.16	4.84	101	0	0	1	1
Lysine	Pure water	Pure methanol	gradient elution	1.4	1	-0.000258556	0.34	0.51	2.83	2.08	-1.6	-5.39	1.14	0	-3.89	18.16	-3	3	4	5	10	106	1.11e+23	-312026	-21.17	0.86	191.1	191.01	2.28	0	5.99	127	75.3	255	325	8.64	1.15	8.95	18.74	-1	-1.73	0.96	89.3	0	0	2	0
Arginine	Pure water	Pure methanol	gradient elution	1.5	1	0.361927	1.31	-0.43	1.47	1.17	-2.23	-6.02	1.14	0	-3.97	18.16	-4.2	4	4	5	12	176	1.11e+25	-380778	-28.48	1.38	214.93	214.24	2.33	0	9.11	182	56.4	339	241	10.62	3.9	10.66	22.26	-2.7	-2.93	1.97	128	0	0	4	0
Histidine	Pure water	Pure methanol	gradient elution	1.35	1	0.212887	1.03	-0.54	1.3	0.29	-1.91	-4.93	0.18	0	-3.62	18.16	-3.2	3	4	3	11	151	1.11e+19	-344509	-27.47	0.98	180.91	181.77	2.26	0	5.04	160	36.7	296	139	8.38	4.38	5.7	14.6	-3.9	-4.52	8.26	92	1	1	3	0
Citrulline	Pure water	Pure methanol	gradient elution	0.87	1	-0.58518	-0.27	-0.54	1.3	0.87	-2.92	-5.79	1.14	0	-4.15	18.16	-4.3	4	4	5	12	171	1.11e+24	-393268	-29.64	1.53	214.73	215.15	2.33	0	7.6	204	40.5	433	151	12.42	8.36	5.05	24.14	-4.38	-3.03	2.31	118	0	0	3	0
Taurine	Pure water	Pure methanol	gradient elution	0.8	1	-0.939552	-1.43	0.11	3.08	1.25	-1.79	-3.57	1.14	0	-3.67	18.16	-4.1	2	4	2	7	120	11100000000000	-476406	-18.56	1.09	143.51	133.49	2.13	0.01	3.57	138	-7.89	285	-71.8	4.16	6.16	-2.47	10.55	-10.36	-3.86	3.47	88.8	0	0	1	1
Aspartic acid	Pure water	Pure methanol	gradient elution	0.6	1	-0.479244	-1.3	-0.2	2.73	0.87	-2.4	-3.69	1.14	0	-3.77	18.16	-2.8	3	5	3	9	133	1110000000000000	-321630	-21.27	1.32	154.67	151	2.18	0.01	2.79	162	-13.7	337	-89.9	5.61	8.84	3.86	21.36	-4.48	-3.1	8.53	101	0	0	1	0
Tyrosine	Pure water	Pure methanol	gradient elution	5.2	25.1733	0.320537	0.83	-0.75	2.22	-0.33	-1.8	-6.02	-0.01	0	-2.95	21.55	-2.3	3	4	3	13	176	1.11e+23	-395507	-20.45	1.27	210.41	219.03	2.34	0	4.34	158	-11.2	301	-58.2	5.35	7.81	4.18	23.28	-2.58	-2.6	8.84	83.6	0	1	1	0
Hypotaurine	Pure water	Pure methanol	gradient elution	0.82	1	-0.667757	-0.93	0.03	3.16	0.84	-1.88	-3.74	1.14	0	-3.53	18.16	-1.5	2	4	2	6	55.5	1110000000000	-429187	-19.14	0.95	136.46	125.99	2.1	0	5.56	129	43.8	272	164	8.05	3.84	8.34	19	-1.9	-2.55	5.19	82.5	0	0	1	1
L-Hydroxyproline	Pure water	Pure methanol	gradient elution	0.84	1	-0.210747	0.02	0.21	2.82	0.21	-2.18	-4.04	0.18	0	-3.32	18.16	-3.3	3	4	1	9	125	1.11e+17	-299059	-18.75	1.12	155.95	154.27	2.19	0	3.05	140	34.4	301	118	8.1	5.75	7.9	18.5	-1.19	-2.19	3.72	69.6	1	1	1	0
N-omiga-acetylhistamine	Pure water	Pure methanol	gradient elution	4.6	21.2533	1.1594	1.64	-0.89	2.28	0.05	-1.73	-5.87	0.18	0	-3.35	21	-0.4	2	2	3	11	138	1.11e+21	-321960	-23.57	0.83	195.51	194.44	2.29	0	4.66	148	58.4	320	214	11.2	4.88	6.06	14.64	-2.8	-2.61	4.77	57.8	1	1	3	0
L-pyroglutamic acid	Pure water	Pure methanol	gradient elution	0.83	1	-0.647992	-0.34	0.04	2.43	0.28	-1.92	-3.91	0.18	0	-3.39	18.16	-0.8	2	3	1	9	154	1110000000000000	-298326	-20.95	0.96	151.34	146.44	2.17	0	7.17	137	11.3	267	-26.3	6.36	6.48	3.66	21.17	-4.87	-2.3	6.22	66.4	1	1	1	0
Histamine	Pure water	Pure methanol	gradient elution	4.6	21.2533	0.310169	-0.03	-0.53	2.94	0.05	-1.46	-4.65	0.18	0	-3.07	21	-0.7	2	2	2	8	64.7	1.11e+16	-226118	-18.32	0.8	155.19	146.49	2.17	0	4.89	122	68.6	307	360	10.5	2.98	8.7	18.47	-1.26	-2.85	4.92	54.7	1	1	3	0
AaC	Pure water	Pure methanol	gradient elution	10	56.5333	0.992356	1.51	-0.63	2.2	-2.05	-0.55	-6.71	-1.36	0.01	-1.74	25.95	2.6	2	2	0	14	219	1.11e+22	-369670	-14.85	0.86	210.7	216.51	2.34	0	2.51	108	-19	154	-31.5	2.67	3.95	5.78	12.59	0.02	-2.83	2.59	54.7	2	3	3	0
IQx	Pure water	Pure methanol	gradient elution	7.35	39.22	1.02662	1.68	-0.94	0.96	-1.63	-1.26	-6.67	-1.36	0	-2.32	23.52	0.6	1	4	0	15	246	1.11e+23	-414479	-25.04	0.93	218.25	227.81	2.36	0.01	8.8	141	56.1	274	235	9.64	3.08	5.71	14.84	-2.23	-2.75	8.88	69.6	2	3	5	0
MeAaC	Pure water	Pure methanol	gradient elution	10.95	62.74	1.03824	1.49	-0.63	2.3	-2.23	-0.49	-7.31	-1.36	0.01	-1.6	26.82	2.9	2	2	0	15	243	1.11e+25	-394350	-14.53	0.87	227.94	238.72	2.38	0	2.95	104	-11.8	144	-14.1	2.67	3.43	5.81	12.56	0.58	-2.26	3.04	54.7	2	3	3	0
8-MeIQx	Pure water	Pure methanol	gradient elution	8.27	45.2307	1.05546	1.68	-1.05	0.92	-1.78	-1.23	-7.35	-1.36	0	-2.24	24.36	1	1	4	0	16	271	1.11e+26	-439162	-25.13	0.98	237.6	249.06	2.4	0.01	7.72	142	63.8	281	265	10.06	2.97	5.88	15.22	-1.59	-1.95	7.78	69.6	2	3	5	0
MeIQ	Pure water	Pure methanol	gradient elution	8.77	48.4973	1.1744	1.65	-0.82	1.35	-1.94	-0.88	-7.45	-1.36	0.01	-1.87	24.82	2	1	3	0	16	270	1.11e+27	-429091	-21.18	0.93	236.91	253.92	2.4	0	9.17	124	38.5	216	166	7.22	2.74	7.22	16.13	0.27	-4.33	9.28	56.7	2	3	4	0
IQ[4,5-b]	Pure water	Pure methanol	gradient elution	8.9	49.3467	1.06589	1.67	-1.04	0.7	-1.85	-1.15	-6.98	-1.36	0	-2.35	24.94	1.7	1	3	0	15	245	1.11e+24	-404413	-27.45	0.9	223.43	232.81	2.37	0	10.84	139	39.2	269	182	8.87	4.02	6.83	16.69	-0.82	-4.58	11	56.7	2	3	4	0
Harman	Pure water	Pure methanol	gradient elution	10.5	59.8	1.34025	2.02	-0.28	2.69	-2.12	-0.47	-6.93	-1.36	0.01	-1.55	26.4	3.6	1	1	0	14	216	1.11e+23	-359587	-12.73	0.59	214.44	223.28	2.35	0	4.55	81.6	10	132	63.3	3.7	2.33	7.72	16.34	1.94	-4.95	4.58	28.7	2	3	2	0
IQ	Pure water	Pure methanol	gradient elution	8.09	44.0547	1.24121	1.64	-0.72	1.43	-1.82	-0.89	-6.95	-1.36	0	-1.94	24.19	1.5	1	3	0	15	245	1.11e+24	-404413	-20.86	0.92	222.22	233.02	2.37	0	8.83	123	32.7	213	148	6.9	2.78	7	15.75	-0.15	-2.69	8.95	56.7	2	3	4	0
Norharman	Pure water	Pure methanol	gradient elution	10.33	58.6893	1.26292	1.98	-0.36	2.73	-1.99	-0.53	-6.32	-1.36	0.01	-1.74	26.25	3.2	1	1	0	13	193	1.11e+20	-334905	-13.23	0.56	196.55	201.82	2.3	0	4.61	85.1	3.38	142	46.2	3.74	2.88	7.61	16.32	1.37	-4.84	4.64	28.7	2	3	2	0
DMIP	Pure water	Pure methanol	gradient elution	7.33	39.0893	1.17921	1.84	-0.89	1.51	-0.84	-1.28	-6	-0.59	0	-2.72	23.5	1	1	3	0	12	172	1.11e+21	-332645	-25.27	0.81	195.56	198.01	2.3	0.01	9.99	128	57.4	269	243	9.75	3.19	7.16	17.5	-1.15	-4.24	10.15	56.7	2	2	4	0
Phe-p-1	Pure water	Pure methanol	gradient elution	10.16	57.5787	1.33324	2.02	-0.31	2.74	-1.81	-0.45	-6.71	-1.16	0.01	-1.69	26.09	2.3	1	2	1	13	152	1.11e+22	-335660	-12.87	0.73	209.56	213.73	2.33	0	3.22	91.3	4.88	123	51	3.16	1.78	7	14.9	1.32	-6	3.7	38.9	1	2	2	0
PhIP	Pure water	Pure methanol	gradient elution	10.02	56.664	1.07858	1.68	-1.18	0.48	-2.35	-1.09	-8.02	-1.74	0	-2.13	25.96	2.2	1	3	1	17	264	1.11e+28	-453005	-27.08	0.93	254.21	269.18	2.43	0	10.11	144	42.9	263	195	8.87	3.5	6.32	15.87	-0.61	-4.74	10.22	56.7	2	3	4	0
7,8-DiMeIQx	Pure water	Pure methanol	gradient elution	9	50	1.1479	1.75	-1.14	0.84	-1.95	-1.21	-7.94	-1.36	0	-2.15	25.03	1.4	1	4	0	17	297	1.11e+29	-463843	-25.35	1.03	254.55	269.67	2.43	0.01	6.62	143	68.9	284	281	10.44	2.87	6.01	15.48	-1.09	-4.51	6.74	69.6	2	3	5	0
Sarcosine	Pure water	Pure methanol	gradient elution	0.82	1	-0.136975	0.12	1.04	4.28	1.7	-1.4	-3.36	1.14	0	-3.44	18.16	-2.8	2	3	2	6	52.8	1110000000000	-203238	-12.38	0.78	127.98	113.01	2.05	0	2.92	94.2	17.5	201	42.4	4.57	4.19	4.37	24.65	-2.74	-4.93	8.22	49.3	0	0	1	0
Creatinine	Pure water	Pure methanol	gradient elution	1.4	1	0.857323	1.38	-0.84	1.29	-0.34	-2.16	-4.06	0.18	0	-3.48	18.16	-1.8	1	1	0	8	151	111000000000000	-248681	-30.05	0.8	143.83	134.46	2.13	0	11.98	146	74.4	333	274	12.86	4.35	5.11	15.98	-5.3	-5.49	12.08	58.7	1	1	3	0
L-Dihydroorotic acid	Pure water	Pure methanol	gradient elution	4.12	18.1173	-1.72192	-1.34	-0.74	1.72	-0.39	-1.95	-4.41	-0.01	0	-3.24	20.56	-1.5	3	4	1	11	225	1.11e+16	-379565	-23.86	1.38	167.39	163.4	2.21	0.01	5.18	172	-17.2	327	-144	5.51	8.7	2.35	17.25	-6.68	-4.92	4.87	95.5	1	1	2	0
L-Carnosine	Pure water	Pure methanol	gradient elution	1.4	1	-0.0564911	0.15	-0.97	-0.26	0.06	-3.29	-6.89	0.18	0	-4.06	18.16	-4	4	5	6	16	259	1.11e+29	-499765	-38.44	1.62	256.29	270.05	2.43	0	12.99	233	51	527	223	14.27	9.82	9.18	20.43	-2.61	-2.2	9.07	121	1	1	4	0
Betaine	Pure water	Pure methanol	gradient elution	0.88	1	0.723186	1.05	-2.41	-0.47	0.22	-2.88	-4.36	1.14	0	-4.32	18.16	0.5	0	2	1	8	87.6	1.11e+18	-252565	-41.59	0.81	153.39	154.86	2.19	0	15.35	178	181	468	789	21.46	0.08	1.63	14.25	-9.97	-2.66	15.47	40.1	0	0	1	0
Cytosine	Pure water	Pure methanol	gradient elution	1.24	1	0.781972	1.25	-0.79	0.33	-1.16	-2.53	-3.85	-0.01	0	-3.42	18.16	-1.7	2	2	0	8	170	1110000000000	-247927	-34.38	0.87	136.73	126.12	2.1	0	12.89	167	25.9	432	122	12.95	9.67	6.77	18.33	-4	-2.61	13.02	67.5	1	1	3	0
Hypoxanthine	Pure water	Pure methanol	gradient elution	2.2	5.57333	0.0203922	0.45	-0.65	1.31	-1.16	-2.04	-4.15	-0.59	0	-3.06	18.8	-0.5	2	3	0	10	190	11100000000000	-305849	-25.27	0.97	150.2	143.93	2.16	0.01	2.51	159	5.76	351	-26.8	8.83	8.14	3.33	11.33	-6.92	-2.86	2.6	70.1	2	2	4	0
Xanthine	Pure water	Pure methanol	gradient elution	2.41	6.94533	-0.554241	-0.21	-0.57	1.37	-1.12	-2.01	-4.4	-0.59	0	-2.98	18.99	-0.7	3	3	0	11	217	111000000000000	-353097	-23.72	1.25	159.89	153.96	2.19	0.01	6.06	170	-15.1	367	-128	7.64	10.2	7.74	22.93	-2.99	-2.73	6.1	86.9	2	2	4	0
Guanine	Pure water	Pure methanol	gradient elution	2.2	5.57333	0.206336	0.53	-1.03	0.35	-1.62	-2.51	-4.57	-0.59	0	-3.17	18.8	-1.1	3	3	0	11	225	1110000000000000	-340610	-30.43	1.22	164.42	158.81	2.2	0.01	3.28	191	-7.34	441	-50.1	10.78	11.63	4.81	13.86	-5.99	-2.81	3.34	96.2	2	2	5	0
Uracil	Pure water	Pure methanol	gradient elution	1.49	1	-0.0485196	-0.76	-0.14	2.33	-0.31	-1.67	-3.6	-0.01	0	-3.15	18.16	-1.1	2	2	0	8	161	111000000000	-260420	-21.07	0.9	132.41	121.21	2.08	0	6.46	134	3.97	267	-37	6.39	6.45	8.21	24.76	-2.54	-2.48	6.5	58.2	1	1	2	0
Adenine	Pure water	Pure methanol	gradient elution	4.11	18.052	0.884797	1.46	-0.94	0.65	-1.32	-1.96	-4.45	-0.59	0	-2.98	20.55	-0.1	2	4	0	10	127	111000000000000	-293365	-30.51	0.99	153.88	148.09	2.17	0	11.17	161	9.31	380	47.5	10.2	8.73	5.5	15	-4.52	-2.45	11.33	80.5	2	2	5	0
Cytidine	Pure water	Pure methanol	gradient elution	2	4.26667	-0.577312	-0.02	-1.09	-2.05	-1.51	-3.17	-6.49	-0.97	0	-3.23	18.61	-2.1	4	5	2	17	383	1.11e+29	-559442	-33.42	1.74	241.37	261.47	2.42	0.01	6.86	228	40.6	467	146	13.35	9.24	15.82	45.67	-2.4	-3.46	9.4	129	1	2	3	0
Inosine	Pure water	Pure methanol	gradient elution	4.17	18.444	-1.3164	-1.89	-1.81	-1.34	-2.31	-2.91	-7.2	-1.55	0	-2.92	20.6	-1.3	4	7	2	19	405	1.11e+30	-617361	-37.38	1.8	261.27	285.84	2.46	0.01	9.42	243	21.5	459	3.18	11.36	10.23	10.31	29.87	-2.75	-2.08	9.18	129	2	3	4	0
Xanthosine	Pure water	Pure methanol	gradient elution	2.55	7.86	-1.1815	-1.17	-1.33	-1.92	-1.81	-3.1	-7.03	-1.55	0	-3	19.12	-2.4	5	7	2	20	434	1.11e+31	-664603	-37.75	1.91	265.99	291.82	2.47	0.01	15.45	240	28.5	439	14	11	9.33	12.24	32.43	-2.45	-3.34	12.18	146	2	3	4	0
Guanosine	Pure water	Pure methanol	gradient elution	4.3	19.2933	-0.806267	-0.81	-2.13	-2.39	-2.68	-3.18	-7.66	-1.55	0	-2.97	20.72	-1.9	5	7	2	20	446	1.11e+32	-652123	-42.64	2.09	276.17	298.73	2.48	0.01	11.43	271	-5.63	543	-85.9	12.26	14.35	13.14	36.02	-2.86	-2.22	11.13	155	2	3	5	0
Uridine	Pure water	Pure methanol	gradient elution	1.21	1	-1.03002	-0.52	0.1	-0.25	-0.2	-2.3	-6.11	-0.97	0	-3.19	18.16	-2	4	6	2	17	371	1.11e+28	-571934	-25.98	1.71	235.87	256.94	2.41	0.01	5.57	194	28.6	328	37.3	8.29	6.3	11.64	34.25	-0.98	-1.56	4.28	119	1	2	2	0
Adenosine	Pure water	Pure methanol	gradient elution	5.28	25.696	0.0352275	1.04	-1.13	0.66	-1.84	-1.74	-7.3	-1.55	0	-2.12	21.62	-1.1	4	8	2	19	335	1.11e+31	-604889	-23.66	1.73	253.58	283.19	2.45	0.01	2.18	191	36.3	322	107	8.99	5.54	14.19	39.95	-0.74	-3.53	3.84	140	2	3	5	0
D-Pantothenic acid	0.1% formic acid water	0.1% formic acid methanol	gradient elution	5.34	26.088	-0.921609	-0.57	-1.17	1.6	0.36	-2.31	-7.14	1.14	0	-3.39	21.7	-1.1	4	5	6	15	239	1.11e+31	-492236	-26.02	1.56	247.96	269.32	2.43	0	7.46	186	7.26	354	-39.4	8.13	8.95	6.22	23.15	-1.05	-7.18	4.69	107	0	0	1	0
Niacinamide	0.1% formic acid water	0.1% formic acid methanol	gradient elution	2.18	5.44267	0.42647	0.28	0.24	3.02	0.24	-1.34	-4.4	-0.01	0	-2.97	18.81	-0.4	1	2	1	9	114	111000000000000	-261773	-16.8	0.79	152.74	146.35	2.17	0	2.95	112	27.7	215	95.8	7.01	3.68	5.08	12.91	-3.24	-5.1	4.94	56	1	1	2	0
Pyridoxal	0.1% formic acid water	0.1% formic acid methanol	gradient elution	1.62	1.784	0.521214	0.12	1.19	2.47	0.93	-1.68	-5.09	-0.01	0	-3.13	18.29	0	2	4	2	12	162	1.11e+20	-370806	-16.87	1.08	190.02	193.09	2.29	0.01	3.53	121	8.31	226	-19.7	4.94	5.51	5.04	18.08	-1.4	-2.71	3.58	70.4	1	1	1	0
Biotin	0.1% formic acid water	0.1% formic acid methanol	gradient elution	7.18	38.1093	-0.0518818	-0.5	-1.5	0.62	-0.95	-1.78	-8.2	-0.4	0	-3.05	23.38	0.3	3	4	5	16	298	1.11e+31	-705617	-29.67	1.27	265.94	285.19	2.46	0	8.59	187	46.4	337	92.1	9.56	6.53	5.1	24.78	-2.78	-2.77	9.65	104	1	2	2	1
Pyridoxine	0.1% formic acid water	0.1% formic acid methanol	gradient elution	2.2	5.57333	0.987458	0.74	0.26	1.77	0.18	-1.93	-5.36	-0.01	0	-3.08	18.82	-0.8	3	4	2	12	142	1.11e+22	-371565	-22.39	1.06	195.11	198.18	2.3	0	9.44	137	11.5	264	32	6.46	6.06	11.25	32	0.01	-3.22	2.9	73.6	1	1	1	0
Pyridoxamine	0.1% formic acid water	0.1% formic acid methanol	gradient elution	0.85	1	0.789987	0.47	0.77	2.14	0.53	-2.14	-5.45	-0.01	0	-3.21	18.18	-1	3	4	2	12	143	1.11e+23	-359090	-19.85	1.23	199.15	205.79	2.31	0.01	2.37	144	49.5	321	233	9.73	4.96	8.51	18.04	-0.23	-3.37	4.35	79.4	1	1	2	0
Thiamine	0.1% formic acid water	0.1% formic acid methanol	gradient elution	0.91	1	0.568541	0.14	0	0	0.71	-2.02	-8.57	-0.97	0	-4.15	18.18	0	2	6	4	19	269	1.11e+34	-727954	-65.42	1.49	291.55	320.17	2.51	-0.99	0	200	-71.2	335	-70.9	6.56	7.95	14.5	36.27	1.75	-2.99	10.15	104	2	2	4	1
Nicotinic acid	0.1% formic acid water	0.1% formic acid methanol	gradient elution	1.67	2.11067	0.267951	0.3	1.32	3.56	0.9	-1.26	-3.96	-0.01	0	-2.95	18.34	0.4	1	3	1	9	114	11100000000000	-274248	-12.08	0.77	149.15	142	2.15	0	0.88	92.9	1.16	177	-39.1	3.37	4.37	3.73	20.67	-2.73	-2.8	3.67	50.2	1	1	1	0
Glycine	0.1% formic acid water	0.1% formic acid methanol	gradient elution	0.79	1	-0.117048	-0.75	0.42	4.08	1.18	-1.56	-2.67	1.14	0	-3.39	18.18	-3.2	2	3	1	5	42.9	1111111111	-178568	-12.73	0.91	106.87	90.66	1.96	0	1.77	108	19.8	231	83.2	5.48	4.2	6.42	14.8	-1.74	-5.51	8.14	63.3	0	0	1	0
Alanine	0.1% formic acid water	0.1% formic acid methanol	gradient elution	0.81	1	-0.139379	-0.22	0.84	3.79	1.54	-1.5	-3.22	1.14	0	-3.4	18.18	-3	2	3	1	6	61.8	1110000000000	-203245	-12.07	0.88	123.86	112.49	2.05	0	1.93	103	20.6	223	81.1	5.25	4.15	6.92	15.51	-0.69	-4.07	2.88	63.3	0	0	1	0
Leucine	0.1% formic acid water	0.1% formic acid methanol	gradient elution	2.62	8.31733	0.320551	0.19	1.25	3.98	1.96	-1.25	-5.03	1.14	0	-3.25	19.21	-1.5	2	3	3	9	101	1.11e+21	-277279	-11.49	0.91	176.64	178.51	2.25	0	1.75	97.3	10	188	15.9	4.1	4.03	4.32	23.12	-1.46	-4.42	4.6	63.3	0	0	1	0
Isoleucine	0.1% formic acid water	0.1% formic acid methanol	gradient elution	2.42	7.01067	0.321264	0.17	1.36	3.99	2.03	-1.22	-4.97	1.14	0	-3.26	19.03	-1.7	2	3	3	9	103	1.11e+21	-277278	-11.39	0.9	174.76	177.8	2.25	0	1.86	95.2	4.07	178	-13.2	3.66	4.06	5.29	24.73	-0.48	-4.81	8.21	63.3	0	0	1	0
Valine	0.1% formic acid water	0.1% formic acid methanol	gradient elution	1.26	1	0.232274	0.06	1.05	3.48	2.26	-0.95	-4.35	1.14	0	-3.56	18.18	-2.3	2	3	2	8	90.4	1.11e+18	-252603	-16.64	0.58	154.87	154.22	2.19	0	7.95	86.9	30.2	126	74.6	3.87	1.16	5.48	13.49	-1.89	-5.23	8.12	63.3	0	0	1	0
Proline	0.1% formic acid water	0.1% formic acid methanol	gradient elution	0.96	1	0.333838	0.3	1.15	3.62	0.95	-1.39	-4	0.18	0	-3.11	18.18	-2.5	2	3	1	8	103	1.11e+16	-251835	-13.13	0.77	147.6	142.26	2.15	0	3.61	94.9	18	192	36.7	4.47	4	3.51	21.36	-3.35	-4.13	3.48	49.3	1	1	1	0
Phenylalanine	0.1% formic acid water	0.1% formic acid methanol	gradient elution	4.62	21.384	0.193659	0.25	0	2.97	0.25	-1.21	-5.88	-0.01	0	-2.75	21.04	-1.5	2	3	3	12	153	1.11e+22	-348280	-15.74	1.01	200.74	208.03	2.32	0	2.66	122	9.49	216	30.8	4.48	4.38	4.16	22.91	-1.94	-2.63	7.78	63.3	0	1	1	0
Methionine	0.1% formic acid water	0.1% formic acid methanol	gradient elution	1.5	1	-0.0562981	-0.03	1.23	3.26	2.07	-1.52	-5.31	1.14	0	-3.62	18.18	-1.9	2	4	4	9	97	1.11e+19	-502501	-15.83	1.08	186.45	185.96	2.27	0.01	4.25	126	19.1	229	42.1	4.86	4.41	4.94	22.93	-1.51	-3.09	4.05	88.6	0	0	1	1
Tryptophan	0.1% formic acid water	0.1% formic acid methanol	gradient elution	5.75	28.7667	-0.217403	-0.06	-0.77	1.74	-0.71	-1.35	-6.96	-0.59	0	-2.59	22.07	-1.1	3	3	3	15	245	1.11e+26	-430876	-21.02	1.24	233.33	250.05	2.4	0	5.34	153	-10.6	271	-20.2	4.73	6.7	4.11	22.25	-1.98	-4.08	5.74	79.1	1	2	2	0
Serine	0.1% formic acid water	0.1% formic acid methanol	gradient elution	0.79	1	-0.44062	-0.29	0.59	2.82	1.41	-1.57	-3.34	1.14	0	-3.45	18.18	-3.1	3	4	2	7	72.6	11100000000000	-250467	-14.94	1.06	132.32	122.02	2.09	0	3.06	118	4.07	216	-33.2	4.49	4.85	3.58	19.55	-4.08	-3.26	0.99	83.6	0	0	1	0
Glutamine	0.1% formic acid water	0.1% formic acid methanol	gradient elution	0.82	1	-0.481346	-0.25	-0.23	1.53	0.89	-2.43	-4.79	1.14	0	-3.87	18.18	-3.1	3	4	4	10	146	1.11e+19	-333835	-24.89	1.35	180.5	176.05	2.25	0	6.95	174	25	351	64	9.61	7.18	5.6	22.19	-3.61	-5.52	7.53	106	0	0	2	0
Threonine	0.1% formic acid water	0.1% formic acid methanol	gradient elution	0.84	1	-0.287171	-0.22	1	3.49	1.69	-1.63	-3.86	1.14	0	-3.45	18.18	-2.9	3	4	2	8	93.3	1.11e+16	-275147	-14.56	1.14	149.43	144.38	2.16	0.01	4	119	6.4	228	-10.9	5.24	4.98	2.45	17.53	-4.59	-5.42	3.68	83.6	0	0	1	0
Cysteine	0.1% formic acid water	0.1% formic acid methanol	gradient elution	0.88	1	-0.677028	-0.51	1.01	3.62	1.64	-1.19	-4.18	1.14	0	-3.3	18.18	-2.5	3	4	2	7	75.3	11100000000000	-453148	-13.45	1	147.18	141.36	2.15	0.01	3.06	108	-15.6	173	-97.6	1.79	4.69	5.27	20.11	-1.25	-3.34	5	64.3	0	0	1	1
Asparagine	0.1% formic acid water	0.1% formic acid methanol	gradient elution	0.8	1	-0.579775	-0.35	-0.51	2.07	0.57	-2.46	-4.16	1.14	0	-3.86	18.18	-3.4	3	4	3	9	134	1.11e+16	-309157	-24.85	1.33	160.84	155.26	2.19	0	3.88	177	14.7	352	34.5	9.05	7.57	3.77	19.29	-6.05	-4.96	6.4	106	0	0	2	0
Glutamic acid	0.1% formic acid water	0.1% formic acid methanol	gradient elution	0.85	1	-0.521944	-0.29	-0.05	2.12	1.4	-1.87	-4.41	1.14	0	-3.93	18.18	-3.7	3	5	4	10	145	1.11e+18	-346311	-25.1	1.06	172.73	167.41	2.22	0	8.05	150	9.3	247	-26.7	4.8	5.32	4.16	20.54	-4.48	-4.16	4.84	101	0	0	1	1
Lysine	0.1% formic acid water	0.1% formic acid methanol	gradient elution	0.71	1	-0.000258556	-0.3	0.5	2.83	2.08	-1.6	-5.39	1.14	0	-3.89	18.18	-3	3	4	5	10	106	1.11e+23	-312026	-21.17	0.86	191.1	191.01	2.28	0	5.99	127	75.3	255	325	8.64	1.15	8.95	18.74	-1	-1.73	0.96	89.3	0	0	2	0
Arginine	0.1% formic acid water	0.1% formic acid methanol	gradient elution	0.75	1	0.361983	0.16	-0.44	1.47	1.17	-2.22	-6.02	1.14	0	-3.97	18.18	-4.2	4	4	5	12	176	1.11e+25	-380778	-28.48	1.38	214.93	214.24	2.33	0	9.11	182	56.4	339	241	10.62	3.9	10.66	22.26	-2.7	-2.93	1.97	128	0	0	4	0
Histidine	0.1% formic acid water	0.1% formic acid methanol	gradient elution	0.73	1	0.212887	-0.01	-0.54	1.3	0.28	-1.91	-4.93	0.18	0	-3.62	18.18	-3.2	3	4	3	11	151	1.11e+19	-344509	-27.47	0.98	180.91	181.77	2.26	0	5.04	160	36.7	296	139	8.38	4.38	5.7	14.6	-3.9	-4.52	8.26	92	1	1	3	0
Citrulline	0.1% formic acid water	0.1% formic acid methanol	gradient elution	0.87	1	-0.58518	-0.39	-0.54	1.3	0.87	-2.92	-5.79	1.14	0	-4.15	18.18	-4.3	4	4	5	12	171	1.11e+24	-393268	-29.64	1.53	214.73	215.15	2.33	0	7.6	204	40.5	433	151	12.42	8.36	5.05	24.14	-4.38	-3.03	2.31	118	0	0	3	0
Taurine	0.1% formic acid water	0.1% formic acid methanol	gradient elution	0.81	1	-0.939552	-0.86	0.11	3.08	1.25	-1.79	-3.57	1.14	0	-3.67	18.18	-4.1	2	4	2	7	120	11100000000000	-476406	-18.56	1.09	143.51	133.49	2.13	0.01	3.57	138	-7.89	285	-71.8	4.16	6.16	-2.47	10.55	-10.36	-3.86	3.47	88.8	0	0	1	1
Aspartic acid	0.1% formic acid water	0.1% formic acid methanol	gradient elution	0.82	1	-0.479244	-0.44	-0.2	2.73	0.87	-2.4	-3.7	1.14	0	-3.77	18.18	-2.8	3	5	3	9	133	1110000000000000	-321630	-21.27	1.32	154.67	151	2.18	0.01	2.79	162	-13.7	337	-89.9	5.61	8.84	3.86	21.36	-4.48	-3.1	8.53	101	0	0	1	0
Tyrosine	0.1% formic acid water	0.1% formic acid methanol	gradient elution	4.3	19.2933	0.308925	0.14	-0.58	2.22	-0.16	-1.86	-5.95	-0.01	0	-3.01	20.75	-2.3	3	4	3	13	176	1.11e+23	-395507	-20.45	1.27	210.41	219.03	2.34	0	4.34	158	-11.2	301	-58.2	5.35	7.81	4.18	23.28	-2.58	-2.6	8.84	83.6	0	1	1	0
Hypotaurine	0.1% formic acid water	0.1% formic acid methanol	gradient elution	0.82	1	-0.667757	-0.48	0.02	3.16	0.84	-1.88	-3.74	1.14	0	-3.53	18.18	-1.5	2	4	2	6	55.5	1110000000000	-429187	-19.14	0.95	136.46	125.99	2.1	0	5.56	129	43.8	272	164	8.05	3.84	8.34	19	-1.9	-2.55	5.19	82.5	0	0	1	1
L-Hydroxyproline	0.1% formic acid water	0.1% formic acid methanol	gradient elution	0.83	1	-0.210747	-0.07	0.21	2.82	0.21	-2.18	-4.04	0.18	0	-3.31	18.18	-3.3	3	4	1	9	125	1.11e+17	-299059	-18.75	1.12	155.95	154.27	2.19	0	3.05	140	34.4	301	118	8.1	5.75	7.9	18.5	-1.19	-2.19	3.72	69.6	1	1	1	0
Spermidine	0.1% formic acid water	0.1% formic acid methanol	gradient elution	0.62	1	0.374059	0.47	1.49	3.54	2.68	-1.89	-6.45	1.14	0	-3.93	18.18	-1	3	3	7	10	56.8	1.11e+28	-277732	-15.74	0.99	217.83	216.4	2.34	0	1.9	124	142	373	727	14.62	0.09	9.46	19.87	0.54	-2.29	2.35	64.1	0	0	3	0
N-omiga-acetylhistamine	0.1% formic acid water	0.1% formic acid methanol	gradient elution	1.01	1	1.04214	0.79	-0.11	2.28	0.61	-2.03	-5.63	0.18	0	-3.64	18.18	-0.4	2	2	3	11	138	1.11e+21	-321960	-23.57	0.83	195.51	194.44	2.29	0	4.66	148	58.4	320	214	11.2	4.88	6.06	14.64	-2.8	-2.61	4.77	57.8	1	1	3	0
L-pyroglutamic acid	0.1% formic acid water	0.1% formic acid methanol	gradient elution	0.81	1	-0.64815	-0.52	0.03	2.43	0.27	-1.92	-3.91	0.18	0	-3.39	18.18	-0.8	2	3	1	9	154	1110000000000000	-298326	-20.95	0.96	151.34	146.44	2.17	0	7.17	137	11.3	267	-26.3	6.36	6.48	3.66	21.17	-4.87	-2.3	6.22	66.4	1	1	1	0
Tyramine	0.1% formic acid water	0.1% formic acid methanol	gradient elution	2.73	9.036	0.337193	0	0.76	3.22	0.64	-1.3	-5.39	-0.01	0	-2.94	19.31	1.1	2	2	2	10	87.3	1.11e+20	-277120	-13.98	0.82	183.62	181.83	2.26	0	2.6	106	27.2	227	168	5.88	3.52	8.82	18.57	0.95	-2.63	3.17	46.2	0	1	1	0
Histamine	0.1% formic acid water	0.1% formic acid methanol	gradient elution	0.66	1	0.289798	0.69	0.15	2.94	0.52	-1.69	-4.48	0.18	0	-3.32	18.18	-0.7	2	2	2	8	64.7	1.11e+16	-226118	-18.32	0.8	155.19	146.49	2.17	0	4.89	122	68.6	307	360	10.5	2.98	8.7	18.47	-1.26	-2.85	4.92	54.7	1	1	3	0
AaC	0.1% formic acid water	0.1% formic acid methanol	gradient elution	8.33	45.6227	0.972358	0.83	-0.51	2.2	-1.81	-0.59	-6.66	-1.36	0.01	-1.77	24.44	2.6	2	2	0	14	219	1.11e+22	-369670	-14.85	0.86	210.7	216.51	2.34	0	2.51	108	-19	154	-31.5	2.67	3.95	5.78	12.59	0.02	-2.83	2.59	54.7	2	3	3	0
IQx	0.1% formic acid water	0.1% formic acid methanol	gradient elution	5.76	28.832	1.00648	0.76	-0.84	0.96	-1.44	-1.36	-6.6	-1.36	0	-2.34	22.08	0.6	1	4	0	15	246	1.11e+23	-414479	-25.04	0.93	218.25	227.81	2.36	0.01	8.8	141	56.1	274	235	9.64	3.08	5.71	14.84	-2.23	-2.75	8.88	69.6	2	3	5	0
MeAaC	0.1% formic acid water	0.1% formic acid methanol	gradient elution	9.17	51.1107	1.00466	0.95	-0.5	2.3	-1.96	-0.52	-7.26	-1.36	0.01	-1.63	25.21	2.9	2	2	0	15	243	1.11e+25	-394350	-14.53	0.87	227.94	238.72	2.38	0	2.95	104	-11.8	144	-14.1	2.67	3.43	5.81	12.56	0.58	-2.26	3.04	54.7	2	3	3	0
8-MeIQx	0.1% formic acid water	0.1% formic acid methanol	gradient elution	6.57	34.124	0.986641	0.77	-0.94	0.92	-1.56	-1.33	-7.28	-1.36	0	-2.27	22.83	1	1	4	0	16	271	1.11e+26	-439162	-25.13	0.98	237.6	249.06	2.4	0.01	7.72	142	63.8	281	265	10.06	2.97	5.88	15.22	-1.59	-1.95	7.78	69.6	2	3	5	0
MeIQ	0.1% formic acid water	0.1% formic acid methanol	gradient elution	5.76	28.832	1.04709	0.83	-0.48	1.35	-1.41	-1.02	-7.32	-1.36	0	-1.98	22.08	2	1	3	0	16	270	1.11e+27	-429091	-21.18	0.93	236.91	253.92	2.4	0	9.17	124	38.5	216	166	7.22	2.74	7.22	16.13	0.27	-4.33	9.28	56.7	2	3	4	0
IQ[4,5-b]	0.1% formic acid water	0.1% formic acid methanol	gradient elution	6.61	34.3853	1.0075	0.78	-0.95	0.7	-1.6	-1.26	-6.89	-1.36	0	-2.36	22.86	1.7	1	3	0	15	245	1.11e+24	-404413	-27.45	0.9	223.43	232.81	2.37	0	10.84	139	39.2	269	182	8.87	4.02	6.83	16.69	-0.82	-4.58	11	56.7	2	3	4	0
Harman	0.1% formic acid water	0.1% formic acid methanol	gradient elution	7.43	39.7427	1.18133	1.06	0.04	2.69	-1.58	-0.53	-6.83	-1.36	0.01	-1.65	23.61	3.6	1	1	0	14	216	1.11e+23	-359587	-12.73	0.59	214.44	223.28	2.35	0	4.55	81.6	10	132	63.3	3.7	2.33	7.72	16.34	1.94	-4.95	4.58	28.7	2	3	2	0
IQ	0.1% formic acid water	0.1% formic acid methanol	gradient elution	5.4	26.48	1.09351	0.89	-0.41	1.43	-1.36	-1.02	-6.82	-1.36	0	-2.04	21.75	1.5	1	3	0	15	245	1.11e+24	-404413	-20.86	0.92	222.22	233.02	2.37	0	8.83	123	32.7	213	148	6.9	2.78	7	15.75	-0.15	-2.69	8.95	56.7	2	3	4	0
Norharman	0.1% formic acid water	0.1% formic acid methanol	gradient elution	6.96	36.672	1.13621	1.02	-0.06	2.73	-1.48	-0.6	-6.21	-1.36	0.01	-1.82	23.18	3.2	1	1	0	13	193	1.11e+20	-334905	-13.23	0.56	196.55	201.82	2.3	0	4.61	85.1	3.38	142	46.2	3.74	2.88	7.61	16.32	1.37	-4.84	4.64	28.7	2	3	2	0
DMIP	0.1% formic acid water	0.1% formic acid methanol	gradient elution	5.1	24.52	1.12361	0.94	-0.73	1.51	-0.6	-1.41	-5.91	-0.59	0	-2.76	21.48	1	1	3	0	12	172	1.11e+21	-332645	-25.27	0.81	195.56	198.01	2.3	0.01	9.99	128	57.4	269	243	9.75	3.19	7.16	17.5	-1.15	-4.24	10.15	56.7	2	2	4	0
Phe-p-1	0.1% formic acid water	0.1% formic acid methanol	gradient elution	7.18	38.1093	1.2017	1.05	-0.01	2.74	-1.31	-0.51	-6.62	-1.16	0.01	-1.78	23.38	2.3	1	2	1	13	152	1.11e+22	-335660	-12.87	0.73	209.56	213.73	2.33	0	3.22	91.3	4.88	123	51	3.16	1.78	7	14.9	1.32	-6	3.7	38.9	1	2	2	0
PhIP	0.1% formic acid water	0.1% formic acid methanol	gradient elution	7.86	42.552	1.06308	0.83	-1.1	0.48	-2.09	-1.18	-7.94	-1.74	0	-2.14	24.01	2.2	1	3	1	17	264	1.11e+28	-453005	-27.08	0.93	254.21	269.18	2.43	0	10.11	144	42.9	263	195	8.87	3.5	6.32	15.87	-0.61	-4.74	10.22	56.7	2	3	4	0
7,8-DiMeIQx	0.1% formic acid water	0.1% formic acid methanol	gradient elution	7.25	38.5667	1.08013	0.86	-1.03	0.84	-1.7	-1.3	-7.87	-1.36	0	-2.17	23.45	1.4	1	4	0	17	297	1.11e+29	-463843	-25.35	1.03	254.55	269.67	2.43	0.01	6.62	143	68.9	284	281	10.44	2.87	6.01	15.48	-1.09	-4.51	6.74	69.6	2	3	5	0
Sarcosine	0.1% formic acid water	0.1% formic acid methanol	gradient elution	0.81	1	-0.136975	-0.22	1.03	4.28	1.7	-1.4	-3.36	1.14	0	-3.44	18.18	-2.8	2	3	2	6	52.8	1110000000000	-203238	-12.38	0.78	127.98	113.01	2.05	0	2.92	94.2	17.5	201	42.4	4.57	4.19	4.37	24.65	-2.74	-4.93	8.22	49.3	0	0	1	0
Creatinine	0.1% formic acid water	0.1% formic acid methanol	gradient elution	0.89	1	0.858323	0.27	-0.85	1.29	-0.34	-2.16	-4.06	0.18	0	-3.48	18.18	-1.8	1	1	0	8	151	111000000000000	-248681	-30.05	0.8	143.83	134.46	2.13	0	11.98	146	74.4	333	274	12.86	4.35	5.11	15.98	-5.3	-5.49	12.08	58.7	1	1	3	0
L-Dihydroorotic acid	0.1% formic acid water	0.1% formic acid methanol	gradient elution	1.01	1	-1.69402	-1.33	-0.28	1.72	-0.17	-2.23	-4.13	-0.01	0	-3.4	18.18	-1.5	3	4	1	11	225	1.11e+16	-379565	-23.86	1.38	167.39	163.4	2.21	0.01	5.18	172	-17.2	327	-144	5.51	8.7	2.35	17.25	-6.68	-4.92	4.87	95.5	1	1	2	0
L-Carnosine	0.1% formic acid water	0.1% formic acid methanol	gradient elution	0.75	1	-0.0567834	-0.78	-0.98	-0.26	0.05	-3.29	-6.89	0.18	0	-4.05	18.18	-4	4	5	6	16	259	1.11e+29	-499765	-38.44	1.62	256.29	270.05	2.43	0	12.99	233	51	527	223	14.27	9.82	9.18	20.43	-2.61	-2.2	9.07	121	1	1	4	0
Uric acid	0.1% formic acid water	0.1% formic acid methanol	gradient elution	1.88	3.48267	-0.724844	-0.91	-0.98	-0.06	-1.76	-2.7	-4.59	-0.59	0	-3.31	18.53	-1.9	4	3	0	12	332	1110000000000000	-400333	-32.33	1.46	170.49	165.06	2.22	0.01	4.89	213	-41.9	498	-282	9.31	15.52	5.46	20.01	-5.65	-2.96	4.55	99.3	2	2	4	0
Betaine	0.1% formic acid water	0.1% formic acid methanol	gradient elution	0.87	1	0.723113	0.38	-2.41	-0.47	0.21	-2.88	-4.36	1.14	0	-4.32	18.18	0.5	0	2	1	8	87.6	1.11e+18	-252565	-41.59	0.81	153.39	154.86	2.19	0	15.35	178	181	468	789	21.46	0.08	1.63	14.25	-9.97	-2.66	15.47	40.1	0	0	1	0
Cytosine	0.1% formic acid water	0.1% formic acid methanol	gradient elution	0.9	1	0.781972	0.25	-0.79	0.33	-1.16	-2.53	-3.85	-0.01	0	-3.42	18.18	-1.7	2	2	0	8	170	1110000000000	-247927	-34.38	0.87	136.73	126.12	2.1	0	12.89	167	25.9	432	122	12.95	9.67	6.77	18.33	-4	-2.61	13.02	67.5	1	1	3	0
Hypoxanthine	0.1% formic acid water	0.1% formic acid methanol	gradient elution	2.08	4.78933	0.020324	-0.06	-0.64	1.31	-1.16	-2.06	-4.14	-0.59	0	-3.06	18.71	-0.5	2	3	0	10	190	11100000000000	-305849	-25.27	0.97	150.2	143.93	2.16	0.01	2.51	159	5.76	351	-26.8	8.83	8.14	3.33	11.33	-6.92	-2.86	2.6	70.1	2	2	4	0
Xanthine	0.1% formic acid water	0.1% formic acid methanol	gradient elution	2.5	7.53333	-0.554241	-0.37	-0.59	1.37	-1.12	-2	-4.4	-0.59	0	-2.97	19.1	-0.7	3	3	0	11	217	111000000000000	-353097	-23.72	1.25	159.89	153.96	2.19	0.01	6.06	170	-15.1	367	-128	7.64	10.2	7.74	22.93	-2.99	-2.73	6.1	86.9	2	2	4	0
Guanine	0.1% formic acid water	0.1% formic acid methanol	gradient elution	1.52	1.13067	0.20348	0.06	-0.96	0.35	-1.63	-2.61	-4.52	-0.59	0	-3.19	18.2	-1.1	3	3	0	11	225	1110000000000000	-340610	-30.43	1.22	164.42	158.81	2.2	0.01	3.28	191	-7.34	441	-50.1	10.78	11.63	4.81	13.86	-5.99	-2.81	3.34	96.2	2	2	5	0
Uracil	0.1% formic acid water	0.1% formic acid methanol	gradient elution	1.49	1	-0.0485196	-0.62	-0.14	2.33	-0.31	-1.67	-3.6	-0.01	0	-3.15	18.18	-1.1	2	2	0	8	161	111000000000	-260420	-21.07	0.9	132.41	121.21	2.08	0	6.46	134	3.97	267	-37	6.39	6.45	8.21	24.76	-2.54	-2.48	6.5	58.2	1	1	2	0
Adenine	0.1% formic acid water	0.1% formic acid methanol	gradient elution	1.45	1	0.863058	0.52	-0.75	0.65	-1.26	-2.24	-4.3	-0.59	0	-3.03	18.18	-0.1	2	4	0	10	127	111000000000000	-293365	-30.51	0.99	153.88	148.09	2.17	0	11.17	161	9.31	380	47.5	10.2	8.73	5.5	15	-4.52	-2.45	11.33	80.5	2	2	5	0
Beta-Thymidine	0.1% formic acid water	0.1% formic acid methanol	gradient elution	4.95	23.54	-1.55943	-1.71	-0.98	1.16	-1.1	-1.84	-7.11	-0.97	0	-2.68	21.34	-1.2	3	5	2	17	381	1.11e+30	-549390	-24.52	1.42	246.36	266.66	2.43	0.01	4.01	176	50.1	310	96.6	9.28	5.39	15.53	45.1	-0.93	-3.96	6.43	99.1	1	2	2	0
Cytidine	0.1% formic acid water	0.1% formic acid methanol	gradient elution	1.06	1	-0.578502	-0.7	-0.86	-2.05	-1.38	-3.27	-6.41	-0.97	0	-3.32	18.18	-2.1	4	5	2	17	383	1.11e+29	-559442	-33.42	1.74	241.37	261.47	2.42	0.01	6.86	228	40.6	467	146	13.35	9.24	15.82	45.67	-2.4	-3.46	9.4	129	1	2	3	0
Inosine	0.1% formic acid water	0.1% formic acid methanol	gradient elution	4.18	18.5093	-1.3164	-1.24	-1.81	-1.34	-2.31	-2.91	-7.2	-1.55	0	-2.92	20.64	-1.3	4	7	2	19	405	1.11e+30	-617361	-37.38	1.8	261.27	285.84	2.46	0.01	9.42	243	21.5	459	3.18	11.36	10.23	10.31	29.87	-2.75	-2.08	9.18	129	2	3	4	0
Xanthosine	0.1% formic acid water	0.1% formic acid methanol	gradient elution	4.65	21.58	-1.11782	-1.15	-1.76	-1.92	-2.15	-2.78	-7.3	-1.55	0	-2.85	21.07	-2.4	5	7	2	20	434	1.11e+31	-664603	-37.75	1.91	265.99	291.82	2.47	0.01	15.45	240	28.5	439	14	11	9.33	12.24	32.43	-2.45	-3.34	12.18	146	2	3	4	0
Guanosine	0.1% formic acid water	0.1% formic acid methanol	gradient elution	4.21	18.7053	-0.806267	-0.56	-2.13	-2.39	-2.67	-3.19	-7.65	-1.55	0	-2.97	20.66	-1.9	5	7	2	20	446	1.11e+32	-652123	-42.64	2.09	276.17	298.73	2.48	0.01	11.43	271	-5.63	543	-85.9	12.26	14.35	13.14	36.02	-2.86	-2.22	11.13	155	2	3	5	0
Adenosine	0.1% formic acid water	0.1% formic acid methanol	gradient elution	4.23	18.836	0.0485061	0.13	-0.92	0.66	-1.6	-1.84	-7.22	-1.55	0	-2.2	20.68	-1.1	4	8	2	19	335	1.11e+31	-604889	-23.66	1.73	253.58	283.19	2.45	0.01	2.18	191	36.3	322	107	8.99	5.54	14.19	39.95	-0.74	-3.53	3.84	140	2	3	5	0

## Sheet: ANN-C
Compounds	Mobile phase A	Mobile phase B	Elution conditions	Peak time	B%	predicted_values	true_values	ln(gamma)	log(pv)	Total mean interaction energy in the mix (H_int)	H-Bond interaction energy in the mix (H_HB)	VdW interaction energy in the mix (H_vdW)	Gas liquid transition energy in the mix (H_glt)	w_RS	log10(S_RS)	Solvent_MolWeight	XLogP3	Hydrogen Bond Donor Count	Hydrogen Bond Acceptor Count	Rotatable Bond Count	Heavy Atom Count	Complexity	Atomic weights	E_gas	E_diel	Averaging corr dE	Area	Volume	Log(MV)	Total COSMO charge	Dipole moment t_value	Sigma2	Sigma3	Sigma4	Sigma5	H-bond moment (accept)	H-bond moment (donor)	PKA(25,H2O)	PKA(25,MeCN)	logD	WANS*10^5	丨d丨(dipole moment)	Polar Surface Area	Nitrogen Heterocycle Count	Ring Count	Nitrogen Count	Sulfur Count
D-Pantothenic acid	Pure water	Pure methanol	gradient elution	1.7	2.30667	-0.699377	-0.9	0.19	1.6	1.49	-2.76	-6.72	1.14	0	-3.93	18.34	-1.1	4	5	6	15	239	1.11e+31	-492236	-26.02	1.56	247.96	269.32	2.43	0	7.46	186	7.26	354	-39.4	8.13	8.95	6.22	23.15	-1.05	-7.18	4.69	107	0	0	1	0
Niacinamide	Pure water	Pure methanol	gradient elution	4.21	18.7053	0.471337	0.76	-0.2	3.02	-0.07	-1.19	-4.53	-0.01	0	-2.81	20.64	-0.4	1	2	1	9	114	111000000000000	-261773	-16.8	0.79	152.74	146.35	2.17	0	2.95	112	27.7	215	95.8	7.01	3.68	5.08	12.91	-3.24	-5.1	4.94	56	1	1	2	0
Pyridoxal	Pure water	Pure methanol	gradient elution	3.4	13.4133	0.4919	1.03	0.32	2.47	0.24	-1.52	-5.31	-0.01	0	-2.79	19.9	0	2	4	2	12	162	1.11e+20	-370806	-16.87	1.08	190.02	193.09	2.29	0.01	3.53	121	8.31	226	-19.7	4.94	5.51	5.04	18.08	-1.4	-2.71	3.58	70.4	1	1	1	0
Biotin	Pure water	Pure methanol	gradient elution	5.13	24.716	-0.70249	-1.01	-1.32	0.62	-0.66	-1.95	-8.07	-0.4	0	-3.1	21.48	0.3	3	4	5	16	298	1.11e+31	-705617	-29.67	1.27	265.94	285.19	2.46	0	8.59	187	46.4	337	92.1	9.56	6.53	5.1	24.78	-2.78	-2.77	9.65	104	1	2	2	1
Pyridoxine	Pure water	Pure methanol	gradient elution	4.51	20.6653	0.888967	1.55	-0.46	1.77	-0.41	-1.73	-5.58	-0.01	0	-2.81	20.91	-0.8	3	4	2	12	142	1.11e+22	-371565	-22.39	1.06	195.11	198.18	2.3	0	9.44	137	11.5	264	32	6.46	6.06	11.25	32	0.01	-3.22	2.9	73.6	1	1	1	0
Pyridoxamine	Pure water	Pure methanol	gradient elution	4.7	21.9067	0.656442	1.31	-0.41	2.14	-0.4	-1.81	-5.77	-0.01	0	-2.75	21.09	-1	3	4	2	12	143	1.11e+23	-359090	-19.85	1.23	199.15	205.79	2.31	0.01	2.37	144	49.5	321	233	9.73	4.96	8.51	18.04	-0.23	-3.37	4.35	79.4	1	1	2	0
Thiamine	Pure water	Pure methanol	gradient elution	7.5	40.2	0.48653	1.36	0	0	-0.75	-1.53	-9.18	-0.97	0	-3.29	23.65	0	2	6	4	19	269	1.11e+34	-727954	-65.42	1.49	291.55	320.17	2.51	-0.99	0	200	-71.2	335	-70.9	6.56	7.95	14.5	36.27	1.75	-2.99	10.15	104	2	2	4	1
Nicotinic acid	Pure water	Pure methanol	gradient elution	0.98	1	0.337726	0.68	1.42	3.56	0.98	-1.28	-3.94	-0.01	0	-2.99	18.16	0.4	1	3	1	9	114	11100000000000	-274248	-12.08	0.77	149.15	142	2.15	0	0.88	92.9	1.16	177	-39.1	3.37	4.37	3.73	20.67	-2.73	-2.8	3.67	50.2	1	1	1	0
Glycine	Pure water	Pure methanol	gradient elution	0.8	1	-0.339874	-0.68	0.42	4.08	1.18	-1.56	-2.67	1.14	0	-3.39	18.16	-3.2	2	3	1	5	42.9	1111111111	-178568	-12.73	0.91	106.87	90.66	1.96	0	1.77	108	19.8	231	83.2	5.48	4.2	6.42	14.8	-1.74	-5.51	8.14	63.3	0	0	1	0
Alanine	Pure water	Pure methanol	gradient elution	0.82	1	-0.0782756	0.12	0.84	3.79	1.55	-1.5	-3.22	1.14	0	-3.4	18.16	-3	2	3	1	6	61.8	1110000000000	-203245	-12.07	0.88	123.86	112.49	2.05	0	1.93	103	20.6	223	81.1	5.25	4.15	6.92	15.51	-0.69	-4.07	2.88	63.3	0	0	1	0
Leucine	Pure water	Pure methanol	gradient elution	2.04	4.528	0.366911	0.61	1.58	3.98	2.22	-1.29	-4.97	1.14	0	-3.38	18.65	-1.5	2	3	3	9	101	1.11e+21	-277279	-11.49	0.91	176.64	178.51	2.25	0	1.75	97.3	10	188	15.9	4.1	4.03	4.32	23.12	-1.46	-4.42	4.6	63.3	0	0	1	0
Isoleucine	Pure water	Pure methanol	gradient elution	1.89	3.548	0.327619	0.5	1.68	3.99	2.28	-1.26	-4.91	1.14	0	-3.39	18.51	-1.7	2	3	3	9	103	1.11e+21	-277278	-11.39	0.9	174.76	177.8	2.25	0	1.86	95.2	4.07	178	-13.2	3.66	4.06	5.29	24.73	-0.48	-4.81	8.21	63.3	0	0	1	0
Valine	Pure water	Pure methanol	gradient elution	1.04	1	0.215094	0.43	1.05	3.48	2.27	-0.96	-4.35	1.14	0	-3.57	18.16	-2.3	2	3	2	8	90.4	1.11e+18	-252603	-16.64	0.58	154.87	154.22	2.19	0	7.95	86.9	30.2	126	74.6	3.87	1.16	5.48	13.49	-1.89	-5.23	8.12	63.3	0	0	1	0
Proline	Pure water	Pure methanol	gradient elution	0.96	1	0.339355	0.62	1.16	3.62	0.95	-1.39	-4	0.18	0	-3.11	18.16	-2.5	2	3	1	8	103	1.11e+16	-251835	-13.13	0.77	147.6	142.26	2.15	0	3.61	94.9	18	192	36.7	4.47	4	3.51	21.36	-3.35	-4.13	3.48	49.3	1	1	1	0
Phenylalanine	Pure water	Pure methanol	gradient elution	4.4	19.9467	0.267407	0.34	0.05	2.97	0.3	-1.22	-5.87	-0.01	0	-2.77	20.81	-1.5	2	3	3	12	153	1.11e+22	-348280	-15.74	1.01	200.74	208.03	2.32	0	2.66	122	9.49	216	30.8	4.48	4.38	4.16	22.91	-1.94	-2.63	7.78	63.3	0	1	1	0
Methionine	Pure water	Pure methanol	gradient elution	1.4	1	0.0728598	0.24	1.24	3.26	2.08	-1.52	-5.31	1.14	0	-3.62	18.16	-1.9	2	4	4	9	97	1.11e+19	-502501	-15.83	1.08	186.45	185.96	2.27	0.01	4.25	126	19.1	229	42.1	4.86	4.41	4.94	22.93	-1.51	-3.09	4.05	88.6	0	0	1	1
Tryptophan	Pure water	Pure methanol	gradient elution	5.36	26.2187	-0.130338	-0.08	-0.71	1.74	-0.62	-1.37	-6.93	-0.59	0	-2.61	21.69	-1.1	3	3	3	15	245	1.11e+26	-430876	-21.02	1.24	233.33	250.05	2.4	0	5.34	153	-10.6	271	-20.2	4.73	6.7	4.11	22.25	-1.98	-4.08	5.74	79.1	1	2	2	0
Serine	Pure water	Pure methanol	gradient elution	0.8	1	-0.322696	-0.42	0.59	2.82	1.41	-1.57	-3.34	1.14	0	-3.45	18.16	-3.1	3	4	2	7	72.6	11100000000000	-250467	-14.94	1.06	132.32	122.02	2.09	0	3.06	118	4.07	216	-33.2	4.49	4.85	3.58	19.55	-4.08	-3.26	0.99	83.6	0	0	1	0
Glutamine	Pure water	Pure methanol	gradient elution	0.83	1	-0.298129	-0.02	-0.22	1.53	0.89	-2.44	-4.79	1.14	0	-3.87	18.16	-3.1	3	4	4	10	146	1.11e+19	-333835	-24.89	1.35	180.5	176.05	2.25	0	6.95	174	25	351	64	9.61	7.18	5.6	22.19	-3.61	-5.52	7.53	106	0	0	2	0
Threonine	Pure water	Pure methanol	gradient elution	0.83	1	-0.210147	-0.19	1	3.49	1.7	-1.63	-3.86	1.14	0	-3.45	18.16	-2.9	3	4	2	8	93.3	1.11e+16	-275147	-14.56	1.14	149.43	144.38	2.16	0.01	4	119	6.4	228	-10.9	5.24	4.98	2.45	17.53	-4.59	-5.42	3.68	83.6	0	0	1	0
Cysteine	Pure water	Pure methanol	gradient elution	0.87	1	-0.426444	-1.13	1.02	3.62	1.64	-1.19	-4.18	1.14	0	-3.3	18.16	-2.5	3	4	2	7	75.3	11100000000000	-453148	-13.45	1	147.18	141.36	2.15	0.01	3.06	108	-15.6	173	-97.6	1.79	4.69	5.27	20.11	-1.25	-3.34	5	64.3	0	0	1	1
Asparagine	Pure water	Pure methanol	gradient elution	0.81	1	-0.452476	-0.64	-0.51	2.07	0.57	-2.46	-4.16	1.14	0	-3.86	18.16	-3.4	3	4	3	9	134	1.11e+16	-309157	-24.85	1.33	160.84	155.26	2.19	0	3.88	177	14.7	352	34.5	9.05	7.57	3.77	19.29	-6.05	-4.96	6.4	106	0	0	2	0
Glutamic acid	Pure water	Pure methanol	gradient elution	0.6	1	-0.295894	-0.76	-0.05	2.12	1.4	-1.87	-4.41	1.14	0	-3.93	18.16	-3.7	3	5	4	10	145	1.11e+18	-346311	-25.1	1.06	172.73	167.41	2.22	0	8.05	150	9.3	247	-26.7	4.8	5.32	4.16	20.54	-4.48	-4.16	4.84	101	0	0	1	1
Lysine	Pure water	Pure methanol	gradient elution	1.4	1	0.0322705	0.34	0.51	2.83	2.08	-1.6	-5.39	1.14	0	-3.89	18.16	-3	3	4	5	10	106	1.11e+23	-312026	-21.17	0.86	191.1	191.01	2.28	0	5.99	127	75.3	255	325	8.64	1.15	8.95	18.74	-1	-1.73	0.96	89.3	0	0	2	0
Arginine	Pure water	Pure methanol	gradient elution	1.5	1	0.238025	1.31	-0.43	1.47	1.17	-2.23	-6.02	1.14	0	-3.97	18.16	-4.2	4	4	5	12	176	1.11e+25	-380778	-28.48	1.38	214.93	214.24	2.33	0	9.11	182	56.4	339	241	10.62	3.9	10.66	22.26	-2.7	-2.93	1.97	128	0	0	4	0
Histidine	Pure water	Pure methanol	gradient elution	1.35	1	0.167562	1.03	-0.54	1.3	0.29	-1.91	-4.93	0.18	0	-3.62	18.16	-3.2	3	4	3	11	151	1.11e+19	-344509	-27.47	0.98	180.91	181.77	2.26	0	5.04	160	36.7	296	139	8.38	4.38	5.7	14.6	-3.9	-4.52	8.26	92	1	1	3	0
Citrulline	Pure water	Pure methanol	gradient elution	0.87	1	-0.326578	-0.27	-0.54	1.3	0.87	-2.92	-5.79	1.14	0	-4.15	18.16	-4.3	4	4	5	12	171	1.11e+24	-393268	-29.64	1.53	214.73	215.15	2.33	0	7.6	204	40.5	433	151	12.42	8.36	5.05	24.14	-4.38	-3.03	2.31	118	0	0	3	0
Taurine	Pure water	Pure methanol	gradient elution	0.8	1	-0.749679	-1.43	0.11	3.08	1.25	-1.79	-3.57	1.14	0	-3.67	18.16	-4.1	2	4	2	7	120	11100000000000	-476406	-18.56	1.09	143.51	133.49	2.13	0.01	3.57	138	-7.89	285	-71.8	4.16	6.16	-2.47	10.55	-10.36	-3.86	3.47	88.8	0	0	1	1
Aspartic acid	Pure water	Pure methanol	gradient elution	0.6	1	-0.478875	-1.3	-0.2	2.73	0.87	-2.4	-3.69	1.14	0	-3.77	18.16	-2.8	3	5	3	9	133	1110000000000000	-321630	-21.27	1.32	154.67	151	2.18	0.01	2.79	162	-13.7	337	-89.9	5.61	8.84	3.86	21.36	-4.48	-3.1	8.53	101	0	0	1	0
Tyrosine	Pure water	Pure methanol	gradient elution	5.2	25.1733	0.234708	0.83	-0.75	2.22	-0.33	-1.8	-6.02	-0.01	0	-2.95	21.55	-2.3	3	4	3	13	176	1.11e+23	-395507	-20.45	1.27	210.41	219.03	2.34	0	4.34	158	-11.2	301	-58.2	5.35	7.81	4.18	23.28	-2.58	-2.6	8.84	83.6	0	1	1	0
Hypotaurine	Pure water	Pure methanol	gradient elution	0.82	1	-0.563168	-0.93	0.03	3.16	0.84	-1.88	-3.74	1.14	0	-3.53	18.16	-1.5	2	4	2	6	55.5	1110000000000	-429187	-19.14	0.95	136.46	125.99	2.1	0	5.56	129	43.8	272	164	8.05	3.84	8.34	19	-1.9	-2.55	5.19	82.5	0	0	1	1
L-Hydroxyproline	Pure water	Pure methanol	gradient elution	0.84	1	-0.10953	0.02	0.21	2.82	0.21	-2.18	-4.04	0.18	0	-3.32	18.16	-3.3	3	4	1	9	125	1.11e+17	-299059	-18.75	1.12	155.95	154.27	2.19	0	3.05	140	34.4	301	118	8.1	5.75	7.9	18.5	-1.19	-2.19	3.72	69.6	1	1	1	0
N-omiga-acetylhistamine	Pure water	Pure methanol	gradient elution	4.6	21.2533	0.908275	1.64	-0.89	2.28	0.05	-1.73	-5.87	0.18	0	-3.35	21	-0.4	2	2	3	11	138	1.11e+21	-321960	-23.57	0.83	195.51	194.44	2.29	0	4.66	148	58.4	320	214	11.2	4.88	6.06	14.64	-2.8	-2.61	4.77	57.8	1	1	3	0
L-pyroglutamic acid	Pure water	Pure methanol	gradient elution	0.83	1	-0.472853	-0.34	0.04	2.43	0.28	-1.92	-3.91	0.18	0	-3.39	18.16	-0.8	2	3	1	9	154	1110000000000000	-298326	-20.95	0.96	151.34	146.44	2.17	0	7.17	137	11.3	267	-26.3	6.36	6.48	3.66	21.17	-4.87	-2.3	6.22	66.4	1	1	1	0
Histamine	Pure water	Pure methanol	gradient elution	4.6	21.2533	0.404459	-0.03	-0.53	2.94	0.05	-1.46	-4.65	0.18	0	-3.07	21	-0.7	2	2	2	8	64.7	1.11e+16	-226118	-18.32	0.8	155.19	146.49	2.17	0	4.89	122	68.6	307	360	10.5	2.98	8.7	18.47	-1.26	-2.85	4.92	54.7	1	1	3	0
AaC	Pure water	Pure methanol	gradient elution	10	56.5333	0.965083	1.51	-0.63	2.2	-2.05	-0.55	-6.71	-1.36	0.01	-1.74	25.95	2.6	2	2	0	14	219	1.11e+22	-369670	-14.85	0.86	210.7	216.51	2.34	0	2.51	108	-19	154	-31.5	2.67	3.95	5.78	12.59	0.02	-2.83	2.59	54.7	2	3	3	0
IQx	Pure water	Pure methanol	gradient elution	7.35	39.22	0.91505	1.68	-0.94	0.96	-1.63	-1.26	-6.67	-1.36	0	-2.32	23.52	0.6	1	4	0	15	246	1.11e+23	-414479	-25.04	0.93	218.25	227.81	2.36	0.01	8.8	141	56.1	274	235	9.64	3.08	5.71	14.84	-2.23	-2.75	8.88	69.6	2	3	5	0
MeAaC	Pure water	Pure methanol	gradient elution	10.95	62.74	1.06228	1.49	-0.63	2.3	-2.23	-0.49	-7.31	-1.36	0.01	-1.6	26.82	2.9	2	2	0	15	243	1.11e+25	-394350	-14.53	0.87	227.94	238.72	2.38	0	2.95	104	-11.8	144	-14.1	2.67	3.43	5.81	12.56	0.58	-2.26	3.04	54.7	2	3	3	0
8-MeIQx	Pure water	Pure methanol	gradient elution	8.27	45.2307	0.959701	1.68	-1.05	0.92	-1.78	-1.23	-7.35	-1.36	0	-2.24	24.36	1	1	4	0	16	271	1.11e+26	-439162	-25.13	0.98	237.6	249.06	2.4	0.01	7.72	142	63.8	281	265	10.06	2.97	5.88	15.22	-1.59	-1.95	7.78	69.6	2	3	5	0
MeIQ	Pure water	Pure methanol	gradient elution	8.77	48.4973	1.06732	1.65	-0.82	1.35	-1.94	-0.88	-7.45	-1.36	0.01	-1.87	24.82	2	1	3	0	16	270	1.11e+27	-429091	-21.18	0.93	236.91	253.92	2.4	0	9.17	124	38.5	216	166	7.22	2.74	7.22	16.13	0.27	-4.33	9.28	56.7	2	3	4	0
IQ[4,5-b]	Pure water	Pure methanol	gradient elution	8.9	49.3467	0.98872	1.67	-1.04	0.7	-1.85	-1.15	-6.98	-1.36	0	-2.35	24.94	1.7	1	3	0	15	245	1.11e+24	-404413	-27.45	0.9	223.43	232.81	2.37	0	10.84	139	39.2	269	182	8.87	4.02	6.83	16.69	-0.82	-4.58	11	56.7	2	3	4	0
Harman	Pure water	Pure methanol	gradient elution	10.5	59.8	1.29123	2.02	-0.28	2.69	-2.12	-0.47	-6.93	-1.36	0.01	-1.55	26.4	3.6	1	1	0	14	216	1.11e+23	-359587	-12.73	0.59	214.44	223.28	2.35	0	4.55	81.6	10	132	63.3	3.7	2.33	7.72	16.34	1.94	-4.95	4.58	28.7	2	3	2	0
IQ	Pure water	Pure methanol	gradient elution	8.09	44.0547	1.06802	1.64	-0.72	1.43	-1.82	-0.89	-6.95	-1.36	0	-1.94	24.19	1.5	1	3	0	15	245	1.11e+24	-404413	-20.86	0.92	222.22	233.02	2.37	0	8.83	123	32.7	213	148	6.9	2.78	7	15.75	-0.15	-2.69	8.95	56.7	2	3	4	0
Norharman	Pure water	Pure methanol	gradient elution	10.33	58.6893	1.2273	1.98	-0.36	2.73	-1.99	-0.53	-6.32	-1.36	0.01	-1.74	26.25	3.2	1	1	0	13	193	1.11e+20	-334905	-13.23	0.56	196.55	201.82	2.3	0	4.61	85.1	3.38	142	46.2	3.74	2.88	7.61	16.32	1.37	-4.84	4.64	28.7	2	3	2	0
DMIP	Pure water	Pure methanol	gradient elution	7.33	39.0893	1.15012	1.84	-0.89	1.51	-0.84	-1.28	-6	-0.59	0	-2.72	23.5	1	1	3	0	12	172	1.11e+21	-332645	-25.27	0.81	195.56	198.01	2.3	0.01	9.99	128	57.4	269	243	9.75	3.19	7.16	17.5	-1.15	-4.24	10.15	56.7	2	2	4	0
Phe-p-1	Pure water	Pure methanol	gradient elution	10.16	57.5787	1.24175	2.02	-0.31	2.74	-1.81	-0.45	-6.71	-1.16	0.01	-1.69	26.09	2.3	1	2	1	13	152	1.11e+22	-335660	-12.87	0.73	209.56	213.73	2.33	0	3.22	91.3	4.88	123	51	3.16	1.78	7	14.9	1.32	-6	3.7	38.9	1	2	2	0
PhIP	Pure water	Pure methanol	gradient elution	10.02	56.664	1.10198	1.68	-1.18	0.48	-2.35	-1.09	-8.02	-1.74	0	-2.13	25.96	2.2	1	3	1	17	264	1.11e+28	-453005	-27.08	0.93	254.21	269.18	2.43	0	10.11	144	42.9	263	195	8.87	3.5	6.32	15.87	-0.61	-4.74	10.22	56.7	2	3	4	0
7,8-DiMeIQx	Pure water	Pure methanol	gradient elution	9	50	0.983623	1.75	-1.14	0.84	-1.95	-1.21	-7.94	-1.36	0	-2.15	25.03	1.4	1	4	0	17	297	1.11e+29	-463843	-25.35	1.03	254.55	269.67	2.43	0.01	6.62	143	68.9	284	281	10.44	2.87	6.01	15.48	-1.09	-4.51	6.74	69.6	2	3	5	0
Sarcosine	Pure water	Pure methanol	gradient elution	0.82	1	-0.0703216	0.12	1.04	4.28	1.7	-1.4	-3.36	1.14	0	-3.44	18.16	-2.8	2	3	2	6	52.8	1110000000000	-203238	-12.38	0.78	127.98	113.01	2.05	0	2.92	94.2	17.5	201	42.4	4.57	4.19	4.37	24.65	-2.74	-4.93	8.22	49.3	0	0	1	0
Creatinine	Pure water	Pure methanol	gradient elution	1.4	1	0.707784	1.38	-0.84	1.29	-0.34	-2.16	-4.06	0.18	0	-3.48	18.16	-1.8	1	1	0	8	151	111000000000000	-248681	-30.05	0.8	143.83	134.46	2.13	0	11.98	146	74.4	333	274	12.86	4.35	5.11	15.98	-5.3	-5.49	12.08	58.7	1	1	3	0
L-Dihydroorotic acid	Pure water	Pure methanol	gradient elution	4.12	18.1173	-1.44048	-1.34	-0.74	1.72	-0.39	-1.95	-4.41	-0.01	0	-3.24	20.56	-1.5	3	4	1	11	225	1.11e+16	-379565	-23.86	1.38	167.39	163.4	2.21	0.01	5.18	172	-17.2	327	-144	5.51	8.7	2.35	17.25	-6.68	-4.92	4.87	95.5	1	1	2	0
L-Carnosine	Pure water	Pure methanol	gradient elution	1.4	1	-0.0860598	0.15	-0.97	-0.26	0.06	-3.29	-6.89	0.18	0	-4.06	18.16	-4	4	5	6	16	259	1.11e+29	-499765	-38.44	1.62	256.29	270.05	2.43	0	12.99	233	51	527	223	14.27	9.82	9.18	20.43	-2.61	-2.2	9.07	121	1	1	4	0
Betaine	Pure water	Pure methanol	gradient elution	0.88	1	0.568395	1.05	-2.41	-0.47	0.22	-2.88	-4.36	1.14	0	-4.32	18.16	0.5	0	2	1	8	87.6	1.11e+18	-252565	-41.59	0.81	153.39	154.86	2.19	0	15.35	178	181	468	789	21.46	0.08	1.63	14.25	-9.97	-2.66	15.47	40.1	0	0	1	0
Cytosine	Pure water	Pure methanol	gradient elution	1.24	1	0.65314	1.25	-0.79	0.33	-1.16	-2.53	-3.85	-0.01	0	-3.42	18.16	-1.7	2	2	0	8	170	1110000000000	-247927	-34.38	0.87	136.73	126.12	2.1	0	12.89	167	25.9	432	122	12.95	9.67	6.77	18.33	-4	-2.61	13.02	67.5	1	1	3	0
Hypoxanthine	Pure water	Pure methanol	gradient elution	2.2	5.57333	0.0572417	0.45	-0.65	1.31	-1.16	-2.04	-4.15	-0.59	0	-3.06	18.8	-0.5	2	3	0	10	190	11100000000000	-305849	-25.27	0.97	150.2	143.93	2.16	0.01	2.51	159	5.76	351	-26.8	8.83	8.14	3.33	11.33	-6.92	-2.86	2.6	70.1	2	2	4	0
Xanthine	Pure water	Pure methanol	gradient elution	2.41	6.94533	-0.283627	-0.21	-0.57	1.37	-1.12	-2.01	-4.4	-0.59	0	-2.98	18.99	-0.7	3	3	0	11	217	111000000000000	-353097	-23.72	1.25	159.89	153.96	2.19	0.01	6.06	170	-15.1	367	-128	7.64	10.2	7.74	22.93	-2.99	-2.73	6.1	86.9	2	2	4	0
Guanine	Pure water	Pure methanol	gradient elution	2.2	5.57333	0.297494	0.53	-1.03	0.35	-1.62	-2.51	-4.57	-0.59	0	-3.17	18.8	-1.1	3	3	0	11	225	1110000000000000	-340610	-30.43	1.22	164.42	158.81	2.2	0.01	3.28	191	-7.34	441	-50.1	10.78	11.63	4.81	13.86	-5.99	-2.81	3.34	96.2	2	2	5	0
Uracil	Pure water	Pure methanol	gradient elution	1.49	1	-0.307319	-0.76	-0.14	2.33	-0.31	-1.67	-3.6	-0.01	0	-3.15	18.16	-1.1	2	2	0	8	161	111000000000	-260420	-21.07	0.9	132.41	121.21	2.08	0	6.46	134	3.97	267	-37	6.39	6.45	8.21	24.76	-2.54	-2.48	6.5	58.2	1	1	2	0
Adenine	Pure water	Pure methanol	gradient elution	4.11	18.052	0.739355	1.46	-0.94	0.65	-1.32	-1.96	-4.45	-0.59	0	-2.98	20.55	-0.1	2	4	0	10	127	111000000000000	-293365	-30.51	0.99	153.88	148.09	2.17	0	11.17	161	9.31	380	47.5	10.2	8.73	5.5	15	-4.52	-2.45	11.33	80.5	2	2	5	0
Cytidine	Pure water	Pure methanol	gradient elution	2	4.26667	-0.422153	-0.02	-1.09	-2.05	-1.51	-3.17	-6.49	-0.97	0	-3.23	18.61	-2.1	4	5	2	17	383	1.11e+29	-559442	-33.42	1.74	241.37	261.47	2.42	0.01	6.86	228	40.6	467	146	13.35	9.24	15.82	45.67	-2.4	-3.46	9.4	129	1	2	3	0
Inosine	Pure water	Pure methanol	gradient elution	4.17	18.444	-1.03445	-1.89	-1.81	-1.34	-2.31	-2.91	-7.2	-1.55	0	-2.92	20.6	-1.3	4	7	2	19	405	1.11e+30	-617361	-37.38	1.8	261.27	285.84	2.46	0.01	9.42	243	21.5	459	3.18	11.36	10.23	10.31	29.87	-2.75	-2.08	9.18	129	2	3	4	0
Xanthosine	Pure water	Pure methanol	gradient elution	2.55	7.86	-1.07724	-1.17	-1.33	-1.92	-1.81	-3.1	-7.03	-1.55	0	-3	19.12	-2.4	5	7	2	20	434	1.11e+31	-664603	-37.75	1.91	265.99	291.82	2.47	0.01	15.45	240	28.5	439	14	11	9.33	12.24	32.43	-2.45	-3.34	12.18	146	2	3	4	0
Guanosine	Pure water	Pure methanol	gradient elution	4.3	19.2933	-0.57284	-0.81	-2.13	-2.39	-2.68	-3.18	-7.66	-1.55	0	-2.97	20.72	-1.9	5	7	2	20	446	1.11e+32	-652123	-42.64	2.09	276.17	298.73	2.48	0.01	11.43	271	-5.63	543	-85.9	12.26	14.35	13.14	36.02	-2.86	-2.22	11.13	155	2	3	5	0
Uridine	Pure water	Pure methanol	gradient elution	1.21	1	-1.15959	-0.52	0.1	-0.25	-0.2	-2.3	-6.11	-0.97	0	-3.19	18.16	-2	4	6	2	17	371	1.11e+28	-571934	-25.98	1.71	235.87	256.94	2.41	0.01	5.57	194	28.6	328	37.3	8.29	6.3	11.64	34.25	-0.98	-1.56	4.28	119	1	2	2	0
Adenosine	Pure water	Pure methanol	gradient elution	5.28	25.696	0.0108554	1.04	-1.13	0.66	-1.84	-1.74	-7.3	-1.55	0	-2.12	21.62	-1.1	4	8	2	19	335	1.11e+31	-604889	-23.66	1.73	253.58	283.19	2.45	0.01	2.18	191	36.3	322	107	8.99	5.54	14.19	39.95	-0.74	-3.53	3.84	140	2	3	5	0
D-Pantothenic acid	0.1% formic acid water	0.1% formic acid methanol	gradient elution	5.34	26.088	-0.81677	-0.57	-1.17	1.6	0.36	-2.31	-7.14	1.14	0	-3.39	21.7	-1.1	4	5	6	15	239	1.11e+31	-492236	-26.02	1.56	247.96	269.32	2.43	0	7.46	186	7.26	354	-39.4	8.13	8.95	6.22	23.15	-1.05	-7.18	4.69	107	0	0	1	0
Niacinamide	0.1% formic acid water	0.1% formic acid methanol	gradient elution	2.18	5.44267	0.455828	0.28	0.24	3.02	0.24	-1.34	-4.4	-0.01	0	-2.97	18.81	-0.4	1	2	1	9	114	111000000000000	-261773	-16.8	0.79	152.74	146.35	2.17	0	2.95	112	27.7	215	95.8	7.01	3.68	5.08	12.91	-3.24	-5.1	4.94	56	1	1	2	0
Pyridoxal	0.1% formic acid water	0.1% formic acid methanol	gradient elution	1.62	1.784	0.397497	0.12	1.19	2.47	0.93	-1.68	-5.09	-0.01	0	-3.13	18.29	0	2	4	2	12	162	1.11e+20	-370806	-16.87	1.08	190.02	193.09	2.29	0.01	3.53	121	8.31	226	-19.7	4.94	5.51	5.04	18.08	-1.4	-2.71	3.58	70.4	1	1	1	0
Biotin	0.1% formic acid water	0.1% formic acid methanol	gradient elution	7.18	38.1093	-0.711221	-0.5	-1.5	0.62	-0.95	-1.78	-8.2	-0.4	0	-3.05	23.38	0.3	3	4	5	16	298	1.11e+31	-705617	-29.67	1.27	265.94	285.19	2.46	0	8.59	187	46.4	337	92.1	9.56	6.53	5.1	24.78	-2.78	-2.77	9.65	104	1	2	2	1
Pyridoxine	0.1% formic acid water	0.1% formic acid methanol	gradient elution	2.2	5.57333	0.818227	0.74	0.26	1.77	0.18	-1.93	-5.36	-0.01	0	-3.08	18.82	-0.8	3	4	2	12	142	1.11e+22	-371565	-22.39	1.06	195.11	198.18	2.3	0	9.44	137	11.5	264	32	6.46	6.06	11.25	32	0.01	-3.22	2.9	73.6	1	1	1	0
Pyridoxamine	0.1% formic acid water	0.1% formic acid methanol	gradient elution	0.85	1	0.472215	0.47	0.77	2.14	0.53	-2.14	-5.45	-0.01	0	-3.21	18.18	-1	3	4	2	12	143	1.11e+23	-359090	-19.85	1.23	199.15	205.79	2.31	0.01	2.37	144	49.5	321	233	9.73	4.96	8.51	18.04	-0.23	-3.37	4.35	79.4	1	1	2	0
Thiamine	0.1% formic acid water	0.1% formic acid methanol	gradient elution	0.91	1	0.155965	0.14	0	0	0.71	-2.02	-8.57	-0.97	0	-4.15	18.18	0	2	6	4	19	269	1.11e+34	-727954	-65.42	1.49	291.55	320.17	2.51	-0.99	0	200	-71.2	335	-70.9	6.56	7.95	14.5	36.27	1.75	-2.99	10.15	104	2	2	4	1
Nicotinic acid	0.1% formic acid water	0.1% formic acid methanol	gradient elution	1.67	2.11067	0.33531	0.3	1.32	3.56	0.9	-1.26	-3.96	-0.01	0	-2.95	18.34	0.4	1	3	1	9	114	11100000000000	-274248	-12.08	0.77	149.15	142	2.15	0	0.88	92.9	1.16	177	-39.1	3.37	4.37	3.73	20.67	-2.73	-2.8	3.67	50.2	1	1	1	0
Glycine	0.1% formic acid water	0.1% formic acid methanol	gradient elution	0.79	1	-0.340181	-0.75	0.42	4.08	1.18	-1.56	-2.67	1.14	0	-3.39	18.18	-3.2	2	3	1	5	42.9	1111111111	-178568	-12.73	0.91	106.87	90.66	1.96	0	1.77	108	19.8	231	83.2	5.48	4.2	6.42	14.8	-1.74	-5.51	8.14	63.3	0	0	1	0
Alanine	0.1% formic acid water	0.1% formic acid methanol	gradient elution	0.81	1	-0.0777511	-0.22	0.84	3.79	1.54	-1.5	-3.22	1.14	0	-3.4	18.18	-3	2	3	1	6	61.8	1110000000000	-203245	-12.07	0.88	123.86	112.49	2.05	0	1.93	103	20.6	223	81.1	5.25	4.15	6.92	15.51	-0.69	-4.07	2.88	63.3	0	0	1	0
Leucine	0.1% formic acid water	0.1% formic acid methanol	gradient elution	2.62	8.31733	0.391619	0.19	1.25	3.98	1.96	-1.25	-5.03	1.14	0	-3.25	19.21	-1.5	2	3	3	9	101	1.11e+21	-277279	-11.49	0.91	176.64	178.51	2.25	0	1.75	97.3	10	188	15.9	4.1	4.03	4.32	23.12	-1.46	-4.42	4.6	63.3	0	0	1	0
Isoleucine	0.1% formic acid water	0.1% formic acid methanol	gradient elution	2.42	7.01067	0.35437	0.17	1.36	3.99	2.03	-1.22	-4.97	1.14	0	-3.26	19.03	-1.7	2	3	3	9	103	1.11e+21	-277278	-11.39	0.9	174.76	177.8	2.25	0	1.86	95.2	4.07	178	-13.2	3.66	4.06	5.29	24.73	-0.48	-4.81	8.21	63.3	0	0	1	0
Valine	0.1% formic acid water	0.1% formic acid methanol	gradient elution	1.26	1	0.216721	0.06	1.05	3.48	2.26	-0.95	-4.35	1.14	0	-3.56	18.18	-2.3	2	3	2	8	90.4	1.11e+18	-252603	-16.64	0.58	154.87	154.22	2.19	0	7.95	86.9	30.2	126	74.6	3.87	1.16	5.48	13.49	-1.89	-5.23	8.12	63.3	0	0	1	0
Proline	0.1% formic acid water	0.1% formic acid methanol	gradient elution	0.96	1	0.338608	0.3	1.15	3.62	0.95	-1.39	-4	0.18	0	-3.11	18.18	-2.5	2	3	1	8	103	1.11e+16	-251835	-13.13	0.77	147.6	142.26	2.15	0	3.61	94.9	18	192	36.7	4.47	4	3.51	21.36	-3.35	-4.13	3.48	49.3	1	1	1	0
Phenylalanine	0.1% formic acid water	0.1% formic acid methanol	gradient elution	4.62	21.384	0.266577	0.25	0	2.97	0.25	-1.21	-5.88	-0.01	0	-2.75	21.04	-1.5	2	3	3	12	153	1.11e+22	-348280	-15.74	1.01	200.74	208.03	2.32	0	2.66	122	9.49	216	30.8	4.48	4.38	4.16	22.91	-1.94	-2.63	7.78	63.3	0	1	1	0
Methionine	0.1% formic acid water	0.1% formic acid methanol	gradient elution	1.5	1	0.0731153	-0.03	1.23	3.26	2.07	-1.52	-5.31	1.14	0	-3.62	18.18	-1.9	2	4	4	9	97	1.11e+19	-502501	-15.83	1.08	186.45	185.96	2.27	0.01	4.25	126	19.1	229	42.1	4.86	4.41	4.94	22.93	-1.51	-3.09	4.05	88.6	0	0	1	1
Tryptophan	0.1% formic acid water	0.1% formic acid methanol	gradient elution	5.75	28.7667	-0.137526	-0.06	-0.77	1.74	-0.71	-1.35	-6.96	-0.59	0	-2.59	22.07	-1.1	3	3	3	15	245	1.11e+26	-430876	-21.02	1.24	233.33	250.05	2.4	0	5.34	153	-10.6	271	-20.2	4.73	6.7	4.11	22.25	-1.98	-4.08	5.74	79.1	1	2	2	0
Serine	0.1% formic acid water	0.1% formic acid methanol	gradient elution	0.79	1	-0.322923	-0.29	0.59	2.82	1.41	-1.57	-3.34	1.14	0	-3.45	18.18	-3.1	3	4	2	7	72.6	11100000000000	-250467	-14.94	1.06	132.32	122.02	2.09	0	3.06	118	4.07	216	-33.2	4.49	4.85	3.58	19.55	-4.08	-3.26	0.99	83.6	0	0	1	0
Glutamine	0.1% formic acid water	0.1% formic acid methanol	gradient elution	0.82	1	-0.300901	-0.25	-0.23	1.53	0.89	-2.43	-4.79	1.14	0	-3.87	18.18	-3.1	3	4	4	10	146	1.11e+19	-333835	-24.89	1.35	180.5	176.05	2.25	0	6.95	174	25	351	64	9.61	7.18	5.6	22.19	-3.61	-5.52	7.53	106	0	0	2	0
Threonine	0.1% formic acid water	0.1% formic acid methanol	gradient elution	0.84	1	-0.209705	-0.22	1	3.49	1.69	-1.63	-3.86	1.14	0	-3.45	18.18	-2.9	3	4	2	8	93.3	1.11e+16	-275147	-14.56	1.14	149.43	144.38	2.16	0.01	4	119	6.4	228	-10.9	5.24	4.98	2.45	17.53	-4.59	-5.42	3.68	83.6	0	0	1	0
Cysteine	0.1% formic acid water	0.1% formic acid methanol	gradient elution	0.88	1	-0.428235	-0.51	1.01	3.62	1.64	-1.19	-4.18	1.14	0	-3.3	18.18	-2.5	3	4	2	7	75.3	11100000000000	-453148	-13.45	1	147.18	141.36	2.15	0.01	3.06	108	-15.6	173	-97.6	1.79	4.69	5.27	20.11	-1.25	-3.34	5	64.3	0	0	1	1
Asparagine	0.1% formic acid water	0.1% formic acid methanol	gradient elution	0.8	1	-0.452478	-0.35	-0.51	2.07	0.57	-2.46	-4.16	1.14	0	-3.86	18.18	-3.4	3	4	3	9	134	1.11e+16	-309157	-24.85	1.33	160.84	155.26	2.19	0	3.88	177	14.7	352	34.5	9.05	7.57	3.77	19.29	-6.05	-4.96	6.4	106	0	0	2	0
Glutamic acid	0.1% formic acid water	0.1% formic acid methanol	gradient elution	0.85	1	-0.295591	-0.29	-0.05	2.12	1.4	-1.87	-4.41	1.14	0	-3.93	18.18	-3.7	3	5	4	10	145	1.11e+18	-346311	-25.1	1.06	172.73	167.41	2.22	0	8.05	150	9.3	247	-26.7	4.8	5.32	4.16	20.54	-4.48	-4.16	4.84	101	0	0	1	1
Lysine	0.1% formic acid water	0.1% formic acid methanol	gradient elution	0.71	1	0.0314222	-0.3	0.5	2.83	2.08	-1.6	-5.39	1.14	0	-3.89	18.18	-3	3	4	5	10	106	1.11e+23	-312026	-21.17	0.86	191.1	191.01	2.28	0	5.99	127	75.3	255	325	8.64	1.15	8.95	18.74	-1	-1.73	0.96	89.3	0	0	2	0
Arginine	0.1% formic acid water	0.1% formic acid methanol	gradient elution	0.75	1	0.237387	0.16	-0.44	1.47	1.17	-2.22	-6.02	1.14	0	-3.97	18.18	-4.2	4	4	5	12	176	1.11e+25	-380778	-28.48	1.38	214.93	214.24	2.33	0	9.11	182	56.4	339	241	10.62	3.9	10.66	22.26	-2.7	-2.93	1.97	128	0	0	4	0
Histidine	0.1% formic acid water	0.1% formic acid methanol	gradient elution	0.73	1	0.168159	-0.01	-0.54	1.3	0.28	-1.91	-4.93	0.18	0	-3.62	18.18	-3.2	3	4	3	11	151	1.11e+19	-344509	-27.47	0.98	180.91	181.77	2.26	0	5.04	160	36.7	296	139	8.38	4.38	5.7	14.6	-3.9	-4.52	8.26	92	1	1	3	0
Citrulline	0.1% formic acid water	0.1% formic acid methanol	gradient elution	0.87	1	-0.326458	-0.39	-0.54	1.3	0.87	-2.92	-5.79	1.14	0	-4.15	18.18	-4.3	4	4	5	12	171	1.11e+24	-393268	-29.64	1.53	214.73	215.15	2.33	0	7.6	204	40.5	433	151	12.42	8.36	5.05	24.14	-4.38	-3.03	2.31	118	0	0	3	0
Taurine	0.1% formic acid water	0.1% formic acid methanol	gradient elution	0.81	1	-0.749547	-0.86	0.11	3.08	1.25	-1.79	-3.57	1.14	0	-3.67	18.18	-4.1	2	4	2	7	120	11100000000000	-476406	-18.56	1.09	143.51	133.49	2.13	0.01	3.57	138	-7.89	285	-71.8	4.16	6.16	-2.47	10.55	-10.36	-3.86	3.47	88.8	0	0	1	1
Aspartic acid	0.1% formic acid water	0.1% formic acid methanol	gradient elution	0.82	1	-0.478407	-0.44	-0.2	2.73	0.87	-2.4	-3.7	1.14	0	-3.77	18.18	-2.8	3	5	3	9	133	1110000000000000	-321630	-21.27	1.32	154.67	151	2.18	0.01	2.79	162	-13.7	337	-89.9	5.61	8.84	3.86	21.36	-4.48	-3.1	8.53	101	0	0	1	0
Tyrosine	0.1% formic acid water	0.1% formic acid methanol	gradient elution	4.3	19.2933	0.22003	0.14	-0.58	2.22	-0.16	-1.86	-5.95	-0.01	0	-3.01	20.75	-2.3	3	4	3	13	176	1.11e+23	-395507	-20.45	1.27	210.41	219.03	2.34	0	4.34	158	-11.2	301	-58.2	5.35	7.81	4.18	23.28	-2.58	-2.6	8.84	83.6	0	1	1	0
Hypotaurine	0.1% formic acid water	0.1% formic acid methanol	gradient elution	0.82	1	-0.564838	-0.48	0.02	3.16	0.84	-1.88	-3.74	1.14	0	-3.53	18.18	-1.5	2	4	2	6	55.5	1110000000000	-429187	-19.14	0.95	136.46	125.99	2.1	0	5.56	129	43.8	272	164	8.05	3.84	8.34	19	-1.9	-2.55	5.19	82.5	0	0	1	1
L-Hydroxyproline	0.1% formic acid water	0.1% formic acid methanol	gradient elution	0.83	1	-0.106863	-0.07	0.21	2.82	0.21	-2.18	-4.04	0.18	0	-3.31	18.18	-3.3	3	4	1	9	125	1.11e+17	-299059	-18.75	1.12	155.95	154.27	2.19	0	3.05	140	34.4	301	118	8.1	5.75	7.9	18.5	-1.19	-2.19	3.72	69.6	1	1	1	0
Spermidine	0.1% formic acid water	0.1% formic acid methanol	gradient elution	0.62	1	0.371852	0.47	1.49	3.54	2.68	-1.89	-6.45	1.14	0	-3.93	18.18	-1	3	3	7	10	56.8	1.11e+28	-277732	-15.74	0.99	217.83	216.4	2.34	0	1.9	124	142	373	727	14.62	0.09	9.46	19.87	0.54	-2.29	2.35	64.1	0	0	3	0
N-omiga-acetylhistamine	0.1% formic acid water	0.1% formic acid methanol	gradient elution	1.01	1	0.731962	0.79	-0.11	2.28	0.61	-2.03	-5.63	0.18	0	-3.64	18.18	-0.4	2	2	3	11	138	1.11e+21	-321960	-23.57	0.83	195.51	194.44	2.29	0	4.66	148	58.4	320	214	11.2	4.88	6.06	14.64	-2.8	-2.61	4.77	57.8	1	1	3	0
L-pyroglutamic acid	0.1% formic acid water	0.1% formic acid methanol	gradient elution	0.81	1	-0.475529	-0.52	0.03	2.43	0.27	-1.92	-3.91	0.18	0	-3.39	18.18	-0.8	2	3	1	9	154	1110000000000000	-298326	-20.95	0.96	151.34	146.44	2.17	0	7.17	137	11.3	267	-26.3	6.36	6.48	3.66	21.17	-4.87	-2.3	6.22	66.4	1	1	1	0
Tyramine	0.1% formic acid water	0.1% formic acid methanol	gradient elution	2.73	9.036	0.477028	0	0.76	3.22	0.64	-1.3	-5.39	-0.01	0	-2.94	19.31	1.1	2	2	2	10	87.3	1.11e+20	-277120	-13.98	0.82	183.62	181.83	2.26	0	2.6	106	27.2	227	168	5.88	3.52	8.82	18.57	0.95	-2.63	3.17	46.2	0	1	1	0
Histamine	0.1% formic acid water	0.1% formic acid methanol	gradient elution	0.66	1	0.37172	0.69	0.15	2.94	0.52	-1.69	-4.48	0.18	0	-3.32	18.18	-0.7	2	2	2	8	64.7	1.11e+16	-226118	-18.32	0.8	155.19	146.49	2.17	0	4.89	122	68.6	307	360	10.5	2.98	8.7	18.47	-1.26	-2.85	4.92	54.7	1	1	3	0
AaC	0.1% formic acid water	0.1% formic acid methanol	gradient elution	8.33	45.6227	0.969168	0.83	-0.51	2.2	-1.81	-0.59	-6.66	-1.36	0.01	-1.77	24.44	2.6	2	2	0	14	219	1.11e+22	-369670	-14.85	0.86	210.7	216.51	2.34	0	2.51	108	-19	154	-31.5	2.67	3.95	5.78	12.59	0.02	-2.83	2.59	54.7	2	3	3	0
IQx	0.1% formic acid water	0.1% formic acid methanol	gradient elution	5.76	28.832	0.857667	0.76	-0.84	0.96	-1.44	-1.36	-6.6	-1.36	0	-2.34	22.08	0.6	1	4	0	15	246	1.11e+23	-414479	-25.04	0.93	218.25	227.81	2.36	0.01	8.8	141	56.1	274	235	9.64	3.08	5.71	14.84	-2.23	-2.75	8.88	69.6	2	3	5	0
MeAaC	0.1% formic acid water	0.1% formic acid methanol	gradient elution	9.17	51.1107	1.07608	0.95	-0.5	2.3	-1.96	-0.52	-7.26	-1.36	0.01	-1.63	25.21	2.9	2	2	0	15	243	1.11e+25	-394350	-14.53	0.87	227.94	238.72	2.38	0	2.95	104	-11.8	144	-14.1	2.67	3.43	5.81	12.56	0.58	-2.26	3.04	54.7	2	3	3	0
8-MeIQx	0.1% formic acid water	0.1% formic acid methanol	gradient elution	6.57	34.124	0.893382	0.77	-0.94	0.92	-1.56	-1.33	-7.28	-1.36	0	-2.27	22.83	1	1	4	0	16	271	1.11e+26	-439162	-25.13	0.98	237.6	249.06	2.4	0.01	7.72	142	63.8	281	265	10.06	2.97	5.88	15.22	-1.59	-1.95	7.78	69.6	2	3	5	0
MeIQ	0.1% formic acid water	0.1% formic acid methanol	gradient elution	5.76	28.832	0.893218	0.83	-0.48	1.35	-1.41	-1.02	-7.32	-1.36	0	-1.98	22.08	2	1	3	0	16	270	1.11e+27	-429091	-21.18	0.93	236.91	253.92	2.4	0	9.17	124	38.5	216	166	7.22	2.74	7.22	16.13	0.27	-4.33	9.28	56.7	2	3	4	0
IQ[4,5-b]	0.1% formic acid water	0.1% formic acid methanol	gradient elution	6.61	34.3853	0.895223	0.78	-0.95	0.7	-1.6	-1.26	-6.89	-1.36	0	-2.36	22.86	1.7	1	3	0	15	245	1.11e+24	-404413	-27.45	0.9	223.43	232.81	2.37	0	10.84	139	39.2	269	182	8.87	4.02	6.83	16.69	-0.82	-4.58	11	56.7	2	3	4	0
Harman	0.1% formic acid water	0.1% formic acid methanol	gradient elution	7.43	39.7427	1.2119	1.06	0.04	2.69	-1.58	-0.53	-6.83	-1.36	0.01	-1.65	23.61	3.6	1	1	0	14	216	1.11e+23	-359587	-12.73	0.59	214.44	223.28	2.35	0	4.55	81.6	10	132	63.3	3.7	2.33	7.72	16.34	1.94	-4.95	4.58	28.7	2	3	2	0
IQ	0.1% formic acid water	0.1% formic acid methanol	gradient elution	5.4	26.48	0.967251	0.89	-0.41	1.43	-1.36	-1.02	-6.82	-1.36	0	-2.04	21.75	1.5	1	3	0	15	245	1.11e+24	-404413	-20.86	0.92	222.22	233.02	2.37	0	8.83	123	32.7	213	148	6.9	2.78	7	15.75	-0.15	-2.69	8.95	56.7	2	3	4	0
Norharman	0.1% formic acid water	0.1% formic acid methanol	gradient elution	6.96	36.672	1.17992	1.02	-0.06	2.73	-1.48	-0.6	-6.21	-1.36	0.01	-1.82	23.18	3.2	1	1	0	13	193	1.11e+20	-334905	-13.23	0.56	196.55	201.82	2.3	0	4.61	85.1	3.38	142	46.2	3.74	2.88	7.61	16.32	1.37	-4.84	4.64	28.7	2	3	2	0
DMIP	0.1% formic acid water	0.1% formic acid methanol	gradient elution	5.1	24.52	1.09196	0.94	-0.73	1.51	-0.6	-1.41	-5.91	-0.59	0	-2.76	21.48	1	1	3	0	12	172	1.11e+21	-332645	-25.27	0.81	195.56	198.01	2.3	0.01	9.99	128	57.4	269	243	9.75	3.19	7.16	17.5	-1.15	-4.24	10.15	56.7	2	2	4	0
Phe-p-1	0.1% formic acid water	0.1% formic acid methanol	gradient elution	7.18	38.1093	1.19428	1.05	-0.01	2.74	-1.31	-0.51	-6.62	-1.16	0.01	-1.78	23.38	2.3	1	2	1	13	152	1.11e+22	-335660	-12.87	0.73	209.56	213.73	2.33	0	3.22	91.3	4.88	123	51	3.16	1.78	7	14.9	1.32	-6	3.7	38.9	1	2	2	0
PhIP	0.1% formic acid water	0.1% formic acid methanol	gradient elution	7.86	42.552	1.02147	0.83	-1.1	0.48	-2.09	-1.18	-7.94	-1.74	0	-2.14	24.01	2.2	1	3	1	17	264	1.11e+28	-453005	-27.08	0.93	254.21	269.18	2.43	0	10.11	144	42.9	263	195	8.87	3.5	6.32	15.87	-0.61	-4.74	10.22	56.7	2	3	4	0
7,8-DiMeIQx	0.1% formic acid water	0.1% formic acid methanol	gradient elution	7.25	38.5667	0.921224	0.86	-1.03	0.84	-1.7	-1.3	-7.87	-1.36	0	-2.17	23.45	1.4	1	4	0	17	297	1.11e+29	-463843	-25.35	1.03	254.55	269.67	2.43	0.01	6.62	143	68.9	284	281	10.44	2.87	6.01	15.48	-1.09	-4.51	6.74	69.6	2	3	5	0
Sarcosine	0.1% formic acid water	0.1% formic acid methanol	gradient elution	0.81	1	-0.0722119	-0.22	1.03	4.28	1.7	-1.4	-3.36	1.14	0	-3.44	18.18	-2.8	2	3	2	6	52.8	1110000000000	-203238	-12.38	0.78	127.98	113.01	2.05	0	2.92	94.2	17.5	201	42.4	4.57	4.19	4.37	24.65	-2.74	-4.93	8.22	49.3	0	0	1	0
Creatinine	0.1% formic acid water	0.1% formic acid methanol	gradient elution	0.89	1	0.708916	0.27	-0.85	1.29	-0.34	-2.16	-4.06	0.18	0	-3.48	18.18	-1.8	1	1	0	8	151	111000000000000	-248681	-30.05	0.8	143.83	134.46	2.13	0	11.98	146	74.4	333	274	12.86	4.35	5.11	15.98	-5.3	-5.49	12.08	58.7	1	1	3	0
L-Dihydroorotic acid	0.1% formic acid water	0.1% formic acid methanol	gradient elution	1.01	1	-1.2639	-1.33	-0.28	1.72	-0.17	-2.23	-4.13	-0.01	0	-3.4	18.18	-1.5	3	4	1	11	225	1.11e+16	-379565	-23.86	1.38	167.39	163.4	2.21	0.01	5.18	172	-17.2	327	-144	5.51	8.7	2.35	17.25	-6.68	-4.92	4.87	95.5	1	1	2	0
L-Carnosine	0.1% formic acid water	0.1% formic acid methanol	gradient elution	0.75	1	-0.0844911	-0.78	-0.98	-0.26	0.05	-3.29	-6.89	0.18	0	-4.05	18.18	-4	4	5	6	16	259	1.11e+29	-499765	-38.44	1.62	256.29	270.05	2.43	0	12.99	233	51	527	223	14.27	9.82	9.18	20.43	-2.61	-2.2	9.07	121	1	1	4	0
Uric acid	0.1% formic acid water	0.1% formic acid methanol	gradient elution	1.88	3.48267	-0.619548	-0.91	-0.98	-0.06	-1.76	-2.7	-4.59	-0.59	0	-3.31	18.53	-1.9	4	3	0	12	332	1110000000000000	-400333	-32.33	1.46	170.49	165.06	2.22	0.01	4.89	213	-41.9	498	-282	9.31	15.52	5.46	20.01	-5.65	-2.96	4.55	99.3	2	2	4	0
Betaine	0.1% formic acid water	0.1% formic acid methanol	gradient elution	0.87	1	0.568904	0.38	-2.41	-0.47	0.21	-2.88	-4.36	1.14	0	-4.32	18.18	0.5	0	2	1	8	87.6	1.11e+18	-252565	-41.59	0.81	153.39	154.86	2.19	0	15.35	178	181	468	789	21.46	0.08	1.63	14.25	-9.97	-2.66	15.47	40.1	0	0	1	0
Cytosine	0.1% formic acid water	0.1% formic acid methanol	gradient elution	0.9	1	0.653717	0.25	-0.79	0.33	-1.16	-2.53	-3.85	-0.01	0	-3.42	18.18	-1.7	2	2	0	8	170	1110000000000	-247927	-34.38	0.87	136.73	126.12	2.1	0	12.89	167	25.9	432	122	12.95	9.67	6.77	18.33	-4	-2.61	13.02	67.5	1	1	3	0
Hypoxanthine	0.1% formic acid water	0.1% formic acid methanol	gradient elution	2.08	4.78933	0.060227	-0.06	-0.64	1.31	-1.16	-2.06	-4.14	-0.59	0	-3.06	18.71	-0.5	2	3	0	10	190	11100000000000	-305849	-25.27	0.97	150.2	143.93	2.16	0.01	2.51	159	5.76	351	-26.8	8.83	8.14	3.33	11.33	-6.92	-2.86	2.6	70.1	2	2	4	0
Xanthine	0.1% formic acid water	0.1% formic acid methanol	gradient elution	2.5	7.53333	-0.282386	-0.37	-0.59	1.37	-1.12	-2	-4.4	-0.59	0	-2.97	19.1	-0.7	3	3	0	11	217	111000000000000	-353097	-23.72	1.25	159.89	153.96	2.19	0.01	6.06	170	-15.1	367	-128	7.64	10.2	7.74	22.93	-2.99	-2.73	6.1	86.9	2	2	4	0
Guanine	0.1% formic acid water	0.1% formic acid methanol	gradient elution	1.52	1.13067	0.308492	0.06	-0.96	0.35	-1.63	-2.61	-4.52	-0.59	0	-3.19	18.2	-1.1	3	3	0	11	225	1110000000000000	-340610	-30.43	1.22	164.42	158.81	2.2	0.01	3.28	191	-7.34	441	-50.1	10.78	11.63	4.81	13.86	-5.99	-2.81	3.34	96.2	2	2	5	0
Uracil	0.1% formic acid water	0.1% formic acid methanol	gradient elution	1.49	1	-0.307229	-0.62	-0.14	2.33	-0.31	-1.67	-3.6	-0.01	0	-3.15	18.18	-1.1	2	2	0	8	161	111000000000	-260420	-21.07	0.9	132.41	121.21	2.08	0	6.46	134	3.97	267	-37	6.39	6.45	8.21	24.76	-2.54	-2.48	6.5	58.2	1	1	2	0
Adenine	0.1% formic acid water	0.1% formic acid methanol	gradient elution	1.45	1	0.71173	0.52	-0.75	0.65	-1.26	-2.24	-4.3	-0.59	0	-3.03	18.18	-0.1	2	4	0	10	127	111000000000000	-293365	-30.51	0.99	153.88	148.09	2.17	0	11.17	161	9.31	380	47.5	10.2	8.73	5.5	15	-4.52	-2.45	11.33	80.5	2	2	5	0
Beta-Thymidine	0.1% formic acid water	0.1% formic acid methanol	gradient elution	4.95	23.54	-1.40183	-1.71	-0.98	1.16	-1.1	-1.84	-7.11	-0.97	0	-2.68	21.34	-1.2	3	5	2	17	381	1.11e+30	-549390	-24.52	1.42	246.36	266.66	2.43	0.01	4.01	176	50.1	310	96.6	9.28	5.39	15.53	45.1	-0.93	-3.96	6.43	99.1	1	2	2	0
Cytidine	0.1% formic acid water	0.1% formic acid methanol	gradient elution	1.06	1	-0.42679	-0.7	-0.86	-2.05	-1.38	-3.27	-6.41	-0.97	0	-3.32	18.18	-2.1	4	5	2	17	383	1.11e+29	-559442	-33.42	1.74	241.37	261.47	2.42	0.01	6.86	228	40.6	467	146	13.35	9.24	15.82	45.67	-2.4	-3.46	9.4	129	1	2	3	0
Inosine	0.1% formic acid water	0.1% formic acid methanol	gradient elution	4.18	18.5093	-1.03448	-1.24	-1.81	-1.34	-2.31	-2.91	-7.2	-1.55	0	-2.92	20.64	-1.3	4	7	2	19	405	1.11e+30	-617361	-37.38	1.8	261.27	285.84	2.46	0.01	9.42	243	21.5	459	3.18	11.36	10.23	10.31	29.87	-2.75	-2.08	9.18	129	2	3	4	0
Xanthosine	0.1% formic acid water	0.1% formic acid methanol	gradient elution	4.65	21.58	-1.0205	-1.15	-1.76	-1.92	-2.15	-2.78	-7.3	-1.55	0	-2.85	21.07	-2.4	5	7	2	20	434	1.11e+31	-664603	-37.75	1.91	265.99	291.82	2.47	0.01	15.45	240	28.5	439	14	11	9.33	12.24	32.43	-2.45	-3.34	12.18	146	2	3	4	0
Guanosine	0.1% formic acid water	0.1% formic acid methanol	gradient elution	4.21	18.7053	-0.571667	-0.56	-2.13	-2.39	-2.67	-3.19	-7.65	-1.55	0	-2.97	20.66	-1.9	5	7	2	20	446	1.11e+32	-652123	-42.64	2.09	276.17	298.73	2.48	0.01	11.43	271	-5.63	543	-85.9	12.26	14.35	13.14	36.02	-2.86	-2.22	11.13	155	2	3	5	0
Adenosine	0.1% formic acid water	0.1% formic acid methanol	gradient elution	4.23	18.836	0.0318845	0.13	-0.92	0.66	-1.6	-1.84	-7.22	-1.55	0	-2.2	20.68	-1.1	4	8	2	19	335	1.11e+31	-604889	-23.66	1.73	253.58	283.19	2.45	0.01	2.18	191	36.3	322	107	8.99	5.54	14.19	39.95	-0.74	-3.53	3.84	140	2	3	5	0

## Sheet: MLR-MC
Compounds	Mobile phase A	Mobile phase B	Elution conditions	Peak time	B%	predicted_values	true_values	AATS6dv	AATS6i	ATSC4c	ATSC8d	ATSC7s	ATSC8s	ATSC3Z	ATSC6m	ATSC5v	ATSC6i	AATSC2c	MATS8d	MATS3i	GATS3se	GATS8se	BCUTd-1l	Xc-6d	SssCH2	SdsCH	SaaNH	SdsN	SsssN	AETA_eta_B	BIC1	PEOE_VSA2	SMR_VSA9	SlogP_VSA4	SlogP_VSA11	EState_VSA3	EState_VSA6	n5AHRing	n6AHRing	ln(gamma)	Total mean interaction energy in the mix (H_int)	H-Bond interaction energy in the mix (H_HB)	Solvent_density	M+1	Dipole moment t_value	PKA(25,MeCN)	Sulfur Count
D-Pantothenic acid	Pure water	Pure methanol	gradient elution	1.7	2.30667	-1.08646	-0.9	3.1875	165.167	0.172518	-2.9834	32.1706	-3.39523	-98.1133	112.195	197.571	-4.13803	0.00179049	-0.118086	-0.348219	0.850036	0.967632	0.972576	0.117851	-0.56422	0	0	0	0	0.0403765	0.626558	9.58907	0	5.41499	0	0	0	0	0	0.19	1.49	-2.76	457.6	220.12	7.46	23.15	0
Niacinamide	Pure water	Pure methanol	gradient elution	4.21	18.7053	0.525945	0.76	0	176.484	0.12616	0	2.37136	0	-33.3556	-51.3149	111.629	0.917752	0.00515938	0	-0.381849	1.13373	0	0.97302	0	0	0	0	0	0	0.012187	0.73139	9.77852	0	0	0	5.56345	18.3296	0	0	-0.2	-0.07	-1.19	472.68	123.06	2.95	12.91	0
Pyridoxal	Pure water	Pure methanol	gradient elution	3.4	13.4133	0.50695	1.03	0.25	173.88	-0.0880824	0.979592	-3.84511	3.97298	2.18821	-133.402	-158.857	0.491843	-0.003459	0.521739	-0.147566	0.752946	0	0.957469	0	-0.296713	0.509491	0	0	0	0.0176922	0.78577	9.77852	5.74951	6.92374	5.74951	17.5435	6.92374	0	0	0.32	0.24	-1.52	468.09	168.07	3.53	18.08	0
Biotin	Pure water	Pure methanol	gradient elution	5.13	24.716	-1.84564	-1.01	1.73457	166.727	-0.0469806	-2.05078	-22.899	-9.19049	-119.098	-237.505	61.8081	-0.0757756	0.00826852	-0.104895	-0.135185	0.866324	1.40842	0.972733	0	3.84562	0	0	0	0	0.0155944	0.604004	4.79454	0	0	0	5.24994	0	2	0	-1.32	-0.66	-1.95	477.61	245.1	8.59	24.78	1
Pyridoxine	Pure water	Pure methanol	gradient elution	4.51	20.6653	0.982851	1.55	0.16129	177.19	-0.0286503	0.816635	-1.19975	2.91367	17.586	11.4992	-346.724	4.7732	-0.00287479	0.455696	-0.145423	0.711448	0	0.987195	0	-0.512083	0	0	0	0	0.0176922	0.681116	4.98398	5.74951	6.92374	5.74951	16.8208	6.92374	0	0	-0.46	-0.41	-1.73	474.32	170.08	9.44	32	0
Pyridoxamine	Pure water	Pure methanol	gradient elution	4.7	21.9067	1.01936	1.31	0.131579	179.43	-0.0324451	0.75	0.310957	2.22454	32.375	21.124	-584.022	7.83375	-0.00221284	0.428571	-0.144951	0.724291	0	0.987195	0	0.0679167	0	0	0	0	0.0176922	0.739481	4.98398	5.74951	6.92374	5.74951	16.8208	6.92374	0	0	-0.41	-0.4	-1.81	475.34	169.1	2.37	18.04	0
Nicotinic acid	Pure water	Pure methanol	gradient elution	0.98	1	0.288037	0.68	0	177.102	0.151025	0	1.71485	0	-13.7755	-76.6296	87.6328	1.3341	0.00526081	0	-0.379721	0.847878	0	0.97302	0	0	0	0	0	0	0.012187	0.741757	4.98398	0	0	0	0	6.06637	0	0	1.42	0.98	-1.28	456.28	124.04	0.88	20.67	0
Glycine	Pure water	Pure methanol	gradient elution	0.8	1	-0.148655	-0.68	0	0	-0.23662	0	0	0	-18	0	67.9816	0	0.00646842	0	0.00697033	1.1298	0	0.972633	0	-0.277778	0	0	0	0	0.0288316	0.879588	4.79454	0	0	0	0	0	0	0	0.42	1.18	-1.56	456.28	76.04	1.77	14.8	0
Alanine	Pure water	Pure methanol	gradient elution	0.82	1	-0.03389	0.12	0	0	-0.300229	0	0	0	-26.5917	0	158.987	0	0.00448718	0	-0.145146	0.920777	0	0.972646	0	0	0	0	0	0	0.0452465	0.792124	4.79454	0	0	0	0	0	0	0	0.84	1.55	-1.5	456.28	90.06	1.93	15.51	0
Leucine	Pure water	Pure methanol	gradient elution	2.04	4.528	0.209765	0.61	0	182.681	-0.243313	0	3.94249	0	-48.6446	-337.533	-268.032	6.87103	0.00200733	0	-0.212961	0.679665	0	0.972732	0	0.550926	0	0	0	0	0.0419591	0.620628	4.79454	0	5.91791	0	12.3387	0	0	0	1.58	2.22	-1.29	459.8	132.1	1.75	23.12	0
Isoleucine	Pure water	Pure methanol	gradient elution	1.89	3.548	0.139095	0.5	0	183.24	-0.209198	0	1.97125	0	6.35537	-58.3046	156.045	5.01987	0.00165898	0	-0.157321	0.656972	0	0.972768	0	0.812963	0	0	0	0	0.0358656	0.620628	4.79454	0	5.91791	0	0	0	0	0	1.68	2.28	-1.26	458.83	132.1	1.86	24.73	0
Valine	Pure water	Pure methanol	gradient elution	1.04	1	0.185414	0.43	0	184.918	-0.199833	0	0	0	-24.6981	159.61	98.2167	1.90852	0.00210128	0	-0.306527	0.701903	0	0.97275	0	0	0	0	0	0	0.0450994	0.653082	4.79454	0	5.91791	0	0	13.8475	0	0	1.05	2.27	-0.96	456.28	118.09	7.95	13.49	0
Proline	Pure water	Pure methanol	gradient elution	0.96	1	0.296508	0.62	0	184.918	-0.108799	0	0	0	-17.8858	132.916	-146.36	1.58933	0.00115071	0	-0.0232467	0.687688	0	0.973023	0	2.64213	0	0	0	0	0.0137104	0.674795	4.79454	0	0	0	0	0	1	0	1.16	0.95	-1.39	456.28	116.07	3.61	21.36	0
Phenylalanine	Pure water	Pure methanol	gradient elution	4.4	19.9467	0.0539151	0.34	2.9	168.347	-0.271772	1.38374	-12.174	-5.11494	-47.5312	-68.6233	75.7902	-6.16042	0.00160522	0.387302	-0.0559979	0.729389	1.70862	0.972872	0	0.385093	0	0	0	0	0.0179864	0.677269	4.79454	0	0	0	6.42082	0	0	0	0.05	0.3	-1.22	473.72	166.09	2.66	22.91	0
Methionine	Pure water	Pure methanol	gradient elution	1.4	1	-0.217905	0.24	0.6875	170.668	-0.285717	0.3675	-19.2941	2.07871	-66	-146.383	212.133	-3.99597	0.00183107	0.28655	-0.112273	0.829346	0	0.972807	0	1.36505	0	0	0	0	0.0259416	0.699208	4.79454	0	0	0	6.42082	11.7619	0	0	1.24	2.08	-1.52	456.28	150.06	4.25	22.93	1
Tryptophan	Pure water	Pure methanol	gradient elution	5.36	26.2187	-0.342544	-0.08	4	167.646	-0.358401	2.4952	-10.8272	-11.9136	-41	131.282	-111.107	-3.61455	0.00129651	0.217584	-0.0621933	0.737639	1.96944	0.97287	0	0.346574	0	3.08396	0	0	0.0155115	0.728807	4.79454	0	0	0	6.42082	0	0	0	-0.71	-0.62	-1.37	478.79	205.1	5.34	22.25	0
Serine	Pure water	Pure methanol	gradient elution	0.8	1	-0.547621	-0.42	0	184.918	-0.0793225	0	0	0	0	42.2324	150.707	0.184897	0.000371321	0	-0.155377	0.844324	0	0.972823	0	-0.50463	0	0	0	0	0.0333535	0.835752	4.79454	0	0	0	0	0	0	0	0.59	1.41	-1.57	456.28	106.05	3.06	19.55	0
Glutamine	Pure water	Pure methanol	gradient elution	0.83	1	-0.342376	-0.02	5.82353	183.925	-0.369256	0.32	-23.3139	3.29389	-64.08	59.0726	203.805	3.47946	0.00893018	0.296296	-0.117783	1.0135	0	0.97149	0	0.123148	0	0	0	0	0.0377632	0.737981	9.58907	0	0	0	0	0	0	0	-0.22	0.89	-2.44	456.28	147.08	6.95	22.19	0
Threonine	Pure water	Pure methanol	gradient elution	0.83	1	-0.140561	-0.19	0	184.918	-0.0112833	0	0	0	-29.827	143.955	132.723	0.966889	0.00134405	0	-0.172276	1.00328	0	0.97275	0	0	0	0	0	0	0.0450994	0.775358	4.79454	0	0	0	0	0	0	0	1	1.7	-1.63	456.28	120.07	4	17.53	0
Cysteine	Pure water	Pure methanol	gradient elution	0.87	1	-0.717168	-1.13	0	184.918	-0.191786	0	0	0	11.3469	58.4591	145.624	0.439189	0.00259616	0	-0.10926	0.859568	0	0.972823	0	0.189815	0	0	0	0	0.0333535	0.873274	4.79454	0	0	0	0	0	0	0	1.02	1.64	-1.19	456.28	122.03	3.06	20.11	1
Asparagine	Pure water	Pure methanol	gradient elution	0.81	1	-0.341089	-0.64	0	186.323	-0.360932	0	4.38312	0	-81.7785	-137.418	-17.398	2.35764	0.0116293	0	-0.169425	1.1441	0	0.971481	0	-0.310185	0	0	0	0	0.0419591	0.772083	9.58907	0	0	0	0	0	0	0	-0.51	0.57	-2.46	456.28	133.06	3.88	19.29	0
Glutamic acid	Pure water	Pure methanol	gradient elution	0.6	1	-0.408015	-0.76	8.64286	181.513	-0.386969	0.177285	-19.313	2.12034	-49.3463	86.6142	198.188	2.45247	0.00983419	0.316832	-0.104615	0.944428	0	0.97149	0	-0.224074	0	0	0	0	0.0377632	0.71972	9.58907	0	0	0	0	0	0	0	-0.05	1.4	-1.87	456.28	148.06	8.05	20.54	1
Lysine	Pure water	Pure methanol	gradient elution	1.4	1	0.169139	0.34	1.43333	176.871	-0.259629	1.22222	3.55556	-13.1944	17.5556	4.08586	74.0145	-2.66724	0.00164722	0.285714	-0.0802053	0.674361	2.15039	0.972806	0	2.76768	0	0	0	0	0.0233474	0.606647	4.79454	0	0	0	12.9656	0	0	0	0.51	2.08	-1.6	456.28	147.11	5.99	18.74	0
Arginine	Pure water	Pure methanol	gradient elution	1.5	1	0.566371	1.31	2.80556	179.105	-0.208656	-0.739645	11.78	26.3079	-58.3964	91.4679	41.1409	-1.50151	0.0136703	-0.0753466	-0.0466721	0.941005	0.851054	0.972728	0	1.37579	0	0	3.6796	0	0.0314694	0.67178	9.78694	0	0	0	19.3864	0	0	0	-0.43	1.17	-2.23	456.28	175.12	9.11	22.26	0
Histidine	Pure water	Pure methanol	gradient elution	1.35	1	0.511408	1.03	4.19048	179.568	-0.27497	0.3025	-5.77778	1.17361	-71.6	-105.157	58.7578	1.89288	0.00298234	0.552511	-0.123024	0.886498	0	0.972873	0	0.287037	0	2.76847	0	0	0.0196215	0.828206	4.79454	0	0	0	0	6.19684	0	0	-0.54	0.29	-1.91	456.28	156.08	5.04	14.6	0
Citrulline	Pure water	Pure methanol	gradient elution	0.87	1	-0.569187	-0.27	3	178.858	-0.269396	0.16	0.810578	45.5554	-38.472	-21.8523	46.9787	1.06057	0.013287	0.0208333	-0.066654	0.896729	0.980287	0.971489	0	1.19676	0	0	0	0	0.0314694	0.687895	4.79454	0	0	0	19.3864	0	0	0	-0.54	0.87	-2.92	456.28	176.1	7.6	24.14	0
Taurine	Pure water	Pure methanol	gradient elution	0.8	1	-0.729815	-1.43	0	184.918	0.274994	0	0	0	-63.9388	125.792	-57.6948	0.488671	0.00701129	0	-0.187146	1.21226	0	0.968528	0	-0.383102	0	0	0	0	0.0505076	0.75513	4.55275	0	0	0	0	0	0	0	0.11	1.25	-1.79	456.28	126.02	3.57	10.55	1
Aspartic acid	Pure water	Pure methanol	gradient elution	0.6	1	-0.500008	-1.3	0	185.095	-0.407537	0	2.88292	0	-69.8906	-117.694	46.8817	1.67049	0.0133137	0	-0.150448	1.083	0	0.971481	0	-0.532407	0	0	0	0	0.0419591	0.75299	9.58907	0	0	0	0	0	0	0	-0.2	0.87	-2.4	456.28	134.05	2.79	21.36	0
Tyrosine	Pure water	Pure methanol	gradient elution	5.2	25.1733	0.306409	0.83	3.51613	167.88	-0.290316	0.767361	-9.83922	28.5537	-74	-214.017	199.551	-7.94974	0.00320108	0.13194	-0.0847118	0.844114	1.07785	0.972817	0	0.273426	0	0	0	0	0.0247684	0.721847	4.79454	5.74951	0	5.74951	0	12.1327	0	0	-0.75	-0.33	-1.8	477.97	182.08	4.34	23.28	0
Hypotaurine	Pure water	Pure methanol	gradient elution	0.82	1	-0.441978	-0.93	0	184.918	0.209276	0	0	0	-38.6391	109.154	-29.781	0.569958	0.00335309	0	-0.195251	1.14817	0	0.972911	0	0.46142	0	0	0	0	0.0240263	0.792124	0	0	0	0	0	0	0	0	0.03	0.84	-1.88	456.28	110.03	5.56	19	1
L-Hydroxyproline	Pure water	Pure methanol	gradient elution	0.84	1	-0.276692	0.02	0	185.051	-0.400291	0	1.21408	0	-57	-45.8895	-60.5483	2.15365	0.000677485	0	-0.0570443	0.870699	0	0.972959	0	0.728472	0	0	0	0	0.0239818	0.75264	4.79454	0	0	0	12.9656	0	1	0	0.21	0.21	-2.18	456.28	132.07	3.05	18.5	0
N-omiga-acetylhistamine	Pure water	Pure methanol	gradient elution	4.6	21.2533	1.06748	1.64	3.375	170.64	0.141687	0.5	-1.48646	-4.16208	-108.967	321.703	104.971	-0.182039	0.00368699	0.0827068	0.0116427	1.42407	1.03534	0.972968	0	1.46935	0	2.94846	0	0	0.0115018	0.728783	4.79454	0	0	0	6.54476	12.5242	0	0	-0.89	0.05	-1.73	474.8	154.1	4.66	14.64	0
L-pyroglutamic acid	Pure water	Pure methanol	gradient elution	0.83	1	-0.28378	-0.34	0	185.007	-0.504649	0	0	0	-50.1875	43.7405	-14.2835	1.35384	0.00711642	0	-0.000584856	0.965489	0	0.972787	0	0.768981	0	0	0	0	0.0239818	0.755265	4.79454	0	0	0	12.8416	0	1	0	0.04	0.28	-1.92	456.28	130.05	7.17	21.17	0
Histamine	Pure water	Pure methanol	gradient elution	4.6	21.2533	0.494497	-0.03	0	182.607	0.128306	0	0.715302	0	-32.1488	-0.949554	-137.239	2.02706	-3.71e-05	0	-0.119711	0.938476	0	0.987943	0	1.57162	0	2.94694	0	0	-0.00220476	0.757906	0	0	0	0	6.54476	12.5242	0	0	-0.53	0.05	-1.46	474.8	112.09	4.89	18.47	0
AaC	Pure water	Pure methanol	gradient elution	10	56.5333	0.723608	1.51	1.96154	162.88	0.146992	3.60681	-1.57745	-1.67113	-31.3875	15.0306	-109.367	-5.02864	0.00641062	0.542045	-0.12069	1.21336	1.00514	0.993852	0	0	0	3.22769	0	0	0.00506264	0.581567	0	0	0	0	5.81786	0	0	0	-0.63	-2.05	-0.55	499.53	184.09	2.51	12.59	0
IQx	Pure water	Pure methanol	gradient elution	7.35	39.22	0.894601	1.68	1.84375	172.366	0.0162182	3.5625	-5.28337	0.127315	-17.4444	-134.658	-110.419	1.36099	0.00422157	0.446475	-0.0245659	1.15317	0.407619	0.992546	0	0	0	0	0	0	0.00955711	0.704411	9.96796	0	0	0	5.94834	12.3937	0	0	-0.94	-1.63	-1.26	488.38	200.09	8.8	14.84	0
MeAaC	Pure water	Pure methanol	gradient elution	10.95	62.74	0.558574	1.49	1.71429	160.865	0.0545901	5.56509	-1.16457	-0.829882	-35	-364.037	150.544	-5.79105	0.00534724	0.422697	-0.281273	1.11919	0.665968	0.992526	0	0	0	3.25491	0	0	0.0106796	0.661372	0	0	6.92374	0	5.81786	0	0	0	-0.63	-2.23	-0.49	503.13	198.1	2.95	12.56	0
8-MeIQx	Pure water	Pure methanol	gradient elution	8.27	45.2307	0.680668	1.68	1.82927	168.51	-0.0121457	7.81893	-1.98217	-7.89712	-41.2442	-384.006	-240.894	-0.460649	0.00429773	0.523993	-0.0419453	1.28946	0.879974	0.992546	0	0	0	0	0	0	0.0155944	0.703025	4.98398	0	6.92374	0	5.94834	6.19684	0	0	-1.05	-1.78	-1.23	492.45	214.11	7.72	15.22	0
MeIQ	Pure water	Pure methanol	gradient elution	8.77	48.4973	1.06189	1.65	1.16981	167.004	0.00823206	4.08163	0.403061	0.413265	-24	-305.586	-929.345	-10.6339	0.005709	0.386473	-0.183861	1.15048	0.417761	0.992544	0	0	0	0	0	0	0.0145421	0.693166	4.98398	0	6.92374	0	5.94834	6.19684	0	0	-0.82	-1.94	-0.88	494.56	213.11	9.17	16.13	0
IQ[4,5-b]	Pure water	Pure methanol	gradient elution	8.9	49.3467	1.23834	1.67	2.6	160.132	0.102611	6.232	-3.88071	-0.0924444	-22.3744	-282.441	411.565	-12.6158	0.0072498	0.470411	-0.127017	1.09071	0.528921	0.992546	0	0	0	0	0	0	0.0106796	0.667055	0	0	0	0	11.5955	0	0	0	-1.04	-1.85	-1.15	495.11	199.1	10.84	16.69	0
Harman	Pure water	Pure methanol	gradient elution	10.5	59.8	1.48221	2.02	1.45161	162.332	-0.147276	3.9375	-1.09274	2.32557	-26	-87.8478	-263.891	-8.21315	-0.000671716	0.931034	0.0601656	1.19402	0	0.993878	0	0	0	3.38375	0	0	0.00386002	0.61804	4.98398	0	6.92374	0	0	0	0	0	-0.28	-2.12	-0.47	501.45	183.09	4.55	16.34	0
IQ	Pure water	Pure methanol	gradient elution	8.09	44.0547	1.23515	1.64	1.68571	166.537	-0.00633223	3.1312	-2.95182	-0.471467	-19.1744	-120.622	-181.98	-9.63379	0.00659881	0.393921	-0.123164	1.20767	0.486488	0.992546	0	0	0	0	0	0	0.00955711	0.679819	4.98398	0	0	0	5.94834	6.19684	0	0	-0.72	-1.82	-0.89	491.67	199.1	8.83	15.75	0
Norharman	Pure water	Pure methanol	gradient elution	10.33	58.6893	1.22038	1.98	1.77273	167.047	-0.0911327	0.655329	-0.223923	0.393109	-21.7959	43.0066	-221.607	-3.45951	-0.00147856	1.22458	0.0112688	0.887975	0	1.7516	0	0	0	3.31546	0	0	-0.00271355	0.558507	4.98398	0	0	0	0	0	0	0	-0.36	-1.99	-0.53	500.8	169.08	4.61	16.32	0
DMIP	Pure water	Pure methanol	gradient elution	7.33	39.0893	1.06894	1.84	0.125	163.631	0.11134	2.42975	1.11111	2.66667	-54.0331	-558.981	13.6029	-16.5283	0.00799472	0.590361	-0.333732	1.0747	0	0.992546	0	0	0	0	0	0	0.0193894	0.732239	0	0	6.92374	0	11.5955	6.19684	0	0	-0.89	-0.84	-1.28	488.29	163.1	9.99	17.5	0
Phe-p-1	Pure water	Pure methanol	gradient elution	10.16	57.5787	1.30441	2.02	2.53846	162.062	-0.0397603	0.964083	-1.98173	-1.03592	-43.1739	-37.7978	172.434	-8.27026	0.00354391	0.152057	-0.0635823	1.05992	1.42371	0.99385	0	0	0	0	0	0	0.00415694	0.499656	0	11.1269	0	0	5.81786	6.19684	0	0	-0.31	-1.81	-0.45	500.15	171.09	3.22	14.9	0
PhIP	Pure water	Pure methanol	gradient elution	10.02	56.664	1.75193	1.68	3.55814	159.92	0.107045	-1.02021	1	-3	-28.409	-197.079	416.339	-12.8847	0.00574838	-0.0536384	-0.118507	0.957673	1.15047	0.992546	0	0	0	0	0	0	0.00942314	0.623992	0	11.1269	0	0	11.5955	0	0	0	-1.18	-2.35	-1.09	499.6	225.11	10.11	15.87	0
7,8-DiMeIQx	Pure water	Pure methanol	gradient elution	9	50	1.2311	1.75	1.86	165.806	-0.0452133	-2.17	-4.19506	-4.93741	-37	-393.581	48.3821	-8.11469	0.00432243	-0.108122	-0.00311479	1.41426	1.1293	0.992526	0	0	0	0	0	0	0.019931	0.647383	0	0	13.8475	0	5.94834	0	0	0	-1.14	-1.95	-1.21	495.52	228.12	6.62	15.48	0
Sarcosine	Pure water	Pure methanol	gradient elution	0.82	1	0.156729	0.12	0	184.918	-0.0870714	0	0	0	-31.4142	102.506	-139.296	0.647508	0.00144374	0	0.0438904	0.979599	0	0.972911	0	0.0416667	0	0	0	0	0.0240263	0.758664	4.79454	0	0	0	0	7.04767	0	0	1.04	1.7	-1.4	456.28	90.06	2.92	24.65	0
Creatinine	Pure water	Pure methanol	gradient elution	1.4	1	1.14009	1.38	0	0	0.152068	0	0	0	-90	0	354.201	0	0.0113129	0	-0.314768	1.21391	0	0.977938	0	0.325231	0	0	3.45139	1.59954	0.0269795	0.733849	4.79454	0	0	0	12.5043	11.9476	1	0	-0.84	-0.34	-2.16	456.28	114.07	11.98	15.98	0
L-Dihydroorotic acid	Pure water	Pure methanol	gradient elution	4.12	18.1173	-1.73114	-1.34	0	187.676	-0.668696	0	2.87668	0	-93.699	-261.215	52.8209	2.2227	0.023258	0	0.00627894	1.17376	0	0.972618	0	-0.207269	0	0	0	0	0.0292718	0.789096	10.1113	0	0	0	0	0	0	1	-0.74	-0.39	-1.95	472.18	159.04	5.18	17.25	0
L-Carnosine	Pure water	Pure methanol	gradient elution	1.4	1	-0.00635839	0.15	4.07273	169.76	-0.217252	0.471111	-6.65895	-14.0108	-64	-135.378	-24.5087	-9.90795	0.00368761	0.0268763	-0.0283864	1.01613	1.00508	0.972726	0	0.486737	0	2.7773	0	0	0.017749	0.74402	4.79454	0	0	0	5.69393	0	0	0	-0.97	0.06	-3.29	456.28	227.11	12.99	20.43	0
Betaine	Pure water	Pure methanol	gradient elution	0.88	1	1.09482	1.05	0	0	0.225178	0	0	0	-195.141	0	-361.885	0	-0.00155603	0	-0.418567	0.585225	0	0.97275	0	0.0694444	0	0	0	0	0.0622139	0.469603	0	0	0	0	4.48303	21.143	0	0	-2.41	0.22	-2.88	456.28	118.09	15.35	14.25	0
Cytosine	Pure water	Pure methanol	gradient elution	1.24	1	0.921377	1.25	0	0	0.333051	0	0	0	-59.5266	0	103.863	0	0.025124	0	-0.23766	1.29445	0	0.977719	0	0	0	2.28125	0	0	0.015815	0.795208	4.98398	0	0	0	5.81786	0	0	0	-0.79	-1.16	-2.53	456.28	244.09	12.89	18.33	0
Hypoxanthine	Pure water	Pure methanol	gradient elution	2.2	5.57333	0.172513	0.45	0	184.918	-0.0837538	0	0	0	8	227.824	-171.705	0.962155	0.00358131	0	-0.178483	0.936594	0	0.977857	0	0	0	5.09292	0	0	0.00372035	0.728136	4.79454	0	0	0	11.1639	0	0	0	-0.65	-1.16	-2.04	460.81	269.09	2.51	11.33	0
Xanthine	Pure water	Pure methanol	gradient elution	2.41	6.94533	-0.517101	-0.21	0	185.095	0.0136869	0	0	0	-39.08	-23.5938	51.4977	0.85468	0.0206783	0	-0.142003	1.21659	0	0.977215	0	0	0	7.00843	0	0	0.0130324	0.726429	14.7625	0	0	0	0	0	0	0	-0.57	-1.12	-2.01	462.13	285.08	6.06	22.93	0
Guanine	Pure water	Pure methanol	gradient elution	2.2	5.57333	0.36094	0.53	0	183.104	0.252645	0	6.0434	0	-34.5625	-126.049	-267.038	0.929041	0.017625	0	-0.158414	1.18512	0	0.977827	0	0	0	4.98125	0	0	0.0130324	0.739928	9.77852	0	0	0	11.1639	0	0	0	-1.03	-1.62	-2.51	460.81	284.1	3.28	13.86	0
Uracil	Pure water	Pure methanol	gradient elution	1.49	1	-0.307983	-0.76	0	0	0.20339	0	0	0	-49.0833	0	51.7353	0	0.0294644	0	-0.145434	1.43607	0	0.977161	0	0	0	4.26444	0	0	0.015815	0.746961	9.77852	0	0	0	0	0	0	0	-0.14	-0.31	-1.67	456.28	113.04	6.46	24.76	0
Adenine	Pure water	Pure methanol	gradient elution	4.11	18.052	0.955616	1.46	0	184.918	-0.079507	0	0	0	-9.66667	256.043	-97.6406	0.874208	0.00452556	0	-0.225925	0.799775	0	0.99388	0	0	0	2.82671	0	0	0.00372035	0.726429	0	0	0	0	16.9817	0	0	0	-0.94	-1.32	-1.96	472.13	268.1	11.17	15	0
Cytidine	Pure water	Pure methanol	gradient elution	2	4.26667	-0.740134	-0.02	4.16327	169.415	0.0668159	-2.00556	7.58074	-8.60617	-0.142222	-162.492	114.67	-4.55627	0.00237271	-0.114785	-0.173472	0.958414	0.945774	0.977702	0	-0.452502	0	0	0	0	0.0219589	0.743214	4.5671	0	0	0	0	0	1	0	-1.09	-1.51	-3.17	459.54	112.05	6.86	45.67	0
Inosine	Pure water	Pure methanol	gradient elution	4.17	18.444	-1.32642	-1.89	5.35714	169.805	-0.101128	-2.70968	7.21745	-2.62545	37.0198	105.495	-117.475	2.62073	-0.0026822	-0.123529	-0.15604	0.923862	1.12176	0.977719	0	-0.421262	0	2.38292	0	0	0.0149466	0.729478	9.36164	0	0	0	0	0	1	0	-1.81	-2.31	-2.91	472.46	137.05	9.42	29.87	0
Xanthosine	Pure water	Pure methanol	gradient elution	2.55	7.86	-1.27774	-1.17	5.96667	169.774	0.140549	-3.3125	11.7093	-7.90332	-5.75	-0.995879	79.4792	1.15486	0.00466733	-0.12619	-0.13932	0.981139	1.27513	0.977214	0	-0.47375	0	4.40017	0	0	0.0195069	0.73973	19.3296	0	0	0	0	0	1	0	-1.33	-1.81	-3.1	463	153.04	15.45	32.43	0
Guanosine	Pure water	Pure methanol	gradient elution	4.3	19.2933	-0.932085	-0.81	5.45161	170.413	0.270673	-7.46281	14.5278	-6.16667	0.200184	-141.2	-123.263	0.0426856	0.00370835	-0.257265	-0.134567	0.991755	1.1482	0.977701	0	-0.446918	0	2.29959	0	0	0.390138	0.744966	14.3456	0	0	0	0	0	1	0	-2.13	-2.68	-3.18	473.18	152.06	11.43	36.02	0
Uridine	Pure water	Pure methanol	gradient elution	1.21	1	-1.06598	-0.52	4.39216	169.337	-0.0564181	1.80737	7.79994	-8.20627	-15.0868	-141.765	124.291	-3.09495	0.00479804	0.121445	-0.147671	1.00023	1.1985	0.977214	0	-0.479335	0	2.0005	0	0	0.0219589	0.732168	14.3456	0	0	0	0	0	1	0	0.1	-0.2	-2.3	456.28	245.08	5.57	34.25	0
Adenosine	Pure water	Pure methanol	gradient elution	5.28	25.696	-0.194659	1.04	4.86207	170.386	-0.089798	-3.91895	5.23438	-3.44618	23.1875	108.274	-131.049	1.21257	-0.00231705	-0.159468	-0.169932	0.942973	0.96672	0.987734	0	-0.390397	0	0	0	0	0.0149466	0.723325	4.5671	0	0	0	11.1639	0	1	0	-1.13	-1.84	-1.74	478.38	136.06	2.18	39.95	0
D-Pantothenic acid	0.1% formic acid water	0.1% formic acid methanol	gradient elution	5.34	26.088	-1.02182	-0.57	3.1875	165.167	0.172518	-2.9834	32.1706	-3.39523	-98.1133	112.195	197.571	-4.13803	0.00179049	-0.118086	-0.348219	0.850036	0.967632	0.972576	0.117851	-0.56422	0	0	0	0	0.0403765	0.626558	9.58907	0	5.41499	0	0	0	0	0	-1.17	0.36	-2.31	479.1	220.12	7.46	23.15	0
Niacinamide	0.1% formic acid water	0.1% formic acid methanol	gradient elution	2.18	5.44267	0.575416	0.28	0	176.484	0.12616	0	2.37136	0	-33.3556	-51.3149	111.629	0.917752	0.00515938	0	-0.381849	1.13373	0	0.97302	0	0	0	0	0	0	0.012187	0.73139	9.77852	0	0	0	5.56345	18.3296	0	0	0.24	0.24	-1.34	461.17	123.06	2.95	12.91	0
Pyridoxal	0.1% formic acid water	0.1% formic acid methanol	gradient elution	1.62	1.784	0.487522	0.12	0.25	173.88	-0.0880824	0.979592	-3.84511	3.97298	2.18821	-133.402	-158.857	0.491843	-0.003459	0.521739	-0.147566	0.752946	0	0.957469	0	-0.296713	0.509491	0	0	0	0.0176922	0.78577	9.77852	5.74951	6.92374	5.74951	17.5435	6.92374	0	0	1.19	0.93	-1.68	457.57	168.07	3.53	18.08	0
Biotin	0.1% formic acid water	0.1% formic acid methanol	gradient elution	7.18	38.1093	-1.80182	-0.5	1.73457	166.727	-0.0469806	-2.05078	-22.899	-9.19049	-119.098	-237.505	61.8081	-0.0757756	0.00826852	-0.104895	-0.135185	0.866324	1.40842	0.972733	0	3.84562	0	0	0	0	0.0155944	0.604004	4.79454	0	0	0	5.24994	0	2	0	-1.5	-0.95	-1.78	487.99	245.1	8.59	24.78	1
Pyridoxine	0.1% formic acid water	0.1% formic acid methanol	gradient elution	2.2	5.57333	0.978265	0.74	0.16129	177.19	-0.0286503	0.816635	-1.19975	2.91367	17.586	11.4992	-346.724	4.7732	-0.00287479	0.455696	-0.145423	0.711448	0	0.987195	0	-0.512083	0	0	0	0	0.0176922	0.681116	4.98398	5.74951	6.92374	5.74951	16.8208	6.92374	0	0	0.26	0.18	-1.93	461.3	170.08	9.44	32	0
Pyridoxamine	0.1% formic acid water	0.1% formic acid methanol	gradient elution	0.85	1	1.00548	0.47	0.131579	179.43	-0.0324451	0.75	0.310957	2.22454	32.375	21.124	-584.022	7.83375	-0.00221284	0.428571	-0.144951	0.724291	0	0.987195	0	0.0679167	0	0	0	0	0.0176922	0.739481	4.98398	5.74951	6.92374	5.74951	16.8208	6.92374	0	0	0.77	0.53	-2.14	456.78	169.1	2.37	18.04	0
Nicotinic acid	0.1% formic acid water	0.1% formic acid methanol	gradient elution	0.91	1	-0.339233	0.14	0	177.102	0.151025	0	1.71485	0	-13.7755	-76.6296	87.6328	1.3341	0.00526081	0	-0.379721	0.847878	0	0.97302	0	0	0	0	0	0	0.012187	0.741757	4.98398	0	0	0	0	6.06637	0	0	0	0.71	-2.02	456.78	265.11	0	36.27	1
Glycine	0.1% formic acid water	0.1% formic acid methanol	gradient elution	0.79	1	-0.15325	-0.75	0	0	-0.23662	0	0	0	-18	0	67.9816	0	0.00646842	0	0.00697033	1.1298	0	0.972633	0	-0.277778	0	0	0	0	0.0288316	0.879588	4.79454	0	0	0	0	0	0	0	0.42	1.18	-1.56	456.78	76.04	1.77	14.8	0
Alanine	0.1% formic acid water	0.1% formic acid methanol	gradient elution	0.81	1	-0.0331387	-0.22	0	0	-0.300229	0	0	0	-26.5917	0	158.987	0	0.00448718	0	-0.145146	0.920777	0	0.972646	0	0	0	0	0	0	0.0452465	0.792124	4.79454	0	0	0	0	0	0	0	0.84	1.54	-1.5	456.78	90.06	1.93	15.51	0
Leucine	0.1% formic acid water	0.1% formic acid methanol	gradient elution	2.62	8.31733	0.209693	0.19	0	182.681	-0.243313	0	3.94249	0	-48.6446	-337.533	-268.032	6.87103	0.00200733	0	-0.212961	0.679665	0	0.972732	0	0.550926	0	0	0	0	0.0419591	0.620628	4.79454	0	5.91791	0	12.3387	0	0	0	1.25	1.96	-1.25	463.9	132.1	1.75	23.12	0
Isoleucine	0.1% formic acid water	0.1% formic acid methanol	gradient elution	2.42	7.01067	0.139462	0.17	0	183.24	-0.209198	0	1.97125	0	6.35537	-58.3046	156.045	5.01987	0.00165898	0	-0.157321	0.656972	0	0.972768	0	0.812963	0	0	0	0	0.0358656	0.620628	4.79454	0	5.91791	0	0	0	0	0	1.36	2.03	-1.22	462.67	132.1	1.86	24.73	0
Valine	0.1% formic acid water	0.1% formic acid methanol	gradient elution	1.26	1	0.188829	0.06	0	184.918	-0.199833	0	0	0	-24.6981	159.61	98.2167	1.90852	0.00210128	0	-0.306527	0.701903	0	0.97275	0	0	0	0	0	0	0.0450994	0.653082	4.79454	0	5.91791	0	0	13.8475	0	0	1.05	2.26	-0.95	456.78	118.09	7.95	13.49	0
Proline	0.1% formic acid water	0.1% formic acid methanol	gradient elution	0.96	1	0.288519	0.3	0	184.918	-0.108799	0	0	0	-17.8858	132.916	-146.36	1.58933	0.00115071	0	-0.0232467	0.687688	0	0.973023	0	2.64213	0	0	0	0	0.0137104	0.674795	4.79454	0	0	0	0	0	1	0	1.15	0.95	-1.39	456.78	116.07	3.61	21.36	0
Phenylalanine	0.1% formic acid water	0.1% formic acid methanol	gradient elution	4.62	21.384	0.051446	0.25	2.9	168.347	-0.271772	1.38374	-12.174	-5.11494	-47.5312	-68.6233	75.7902	-6.16042	0.00160522	0.387302	-0.0559979	0.729389	1.70862	0.972872	0	0.385093	0	0	0	0	0.0179864	0.677269	4.79454	0	0	0	6.42082	0	0	0	0	0.25	-1.21	475.34	166.09	2.66	22.91	0
Methionine	0.1% formic acid water	0.1% formic acid methanol	gradient elution	1.5	1	-0.220549	-0.03	0.6875	170.668	-0.285717	0.3675	-19.2941	2.07871	-66	-146.383	212.133	-3.99597	0.00183107	0.28655	-0.112273	0.829346	0	0.972807	0	1.36505	0	0	0	0	0.0259416	0.699208	4.79454	0	0	0	6.42082	11.7619	0	0	1.23	2.07	-1.52	456.78	150.06	4.25	22.93	1
Tryptophan	0.1% formic acid water	0.1% formic acid methanol	gradient elution	5.75	28.7667	-0.331345	-0.06	4	167.646	-0.358401	2.4952	-10.8272	-11.9136	-41	131.282	-111.107	-3.61455	0.00129651	0.217584	-0.0621933	0.737639	1.96944	0.97287	0	0.346574	0	3.08396	0	0	0.0155115	0.728807	4.79454	0	0	0	6.42082	0	0	0	-0.77	-0.71	-1.35	481.17	205.1	5.34	22.25	0
Serine	0.1% formic acid water	0.1% formic acid methanol	gradient elution	0.79	1	-0.552215	-0.29	0	184.918	-0.0793225	0	0	0	0	42.2324	150.707	0.184897	0.000371321	0	-0.155377	0.844324	0	0.972823	0	-0.50463	0	0	0	0	0.0333535	0.835752	4.79454	0	0	0	0	0	0	0	0.59	1.41	-1.57	456.78	106.05	3.06	19.55	0
Glutamine	0.1% formic acid water	0.1% formic acid methanol	gradient elution	0.82	1	-0.347701	-0.25	5.82353	183.925	-0.369256	0.32	-23.3139	3.29389	-64.08	59.0726	203.805	3.47946	0.00893018	0.296296	-0.117783	1.0135	0	0.97149	0	0.123148	0	0	0	0	0.0377632	0.737981	9.58907	0	0	0	0	0	0	0	-0.23	0.89	-2.43	456.78	147.08	6.95	22.19	0
Threonine	0.1% formic acid water	0.1% formic acid methanol	gradient elution	0.84	1	-0.139809	-0.22	0	184.918	-0.0112833	0	0	0	-29.827	143.955	132.723	0.966889	0.00134405	0	-0.172276	1.00328	0	0.97275	0	0	0	0	0	0	0.0450994	0.775358	4.79454	0	0	0	0	0	0	0	1	1.69	-1.63	456.78	120.07	4	17.53	0
Cysteine	0.1% formic acid water	0.1% formic acid methanol	gradient elution	0.88	1	-0.725157	-0.51	0	184.918	-0.191786	0	0	0	11.3469	58.4591	145.624	0.439189	0.00259616	0	-0.10926	0.859568	0	0.972823	0	0.189815	0	0	0	0	0.0333535	0.873274	4.79454	0	0	0	0	0	0	0	1.01	1.64	-1.19	456.78	122.03	3.06	20.11	1
Asparagine	0.1% formic acid water	0.1% formic acid methanol	gradient elution	0.8	1	-0.345683	-0.35	0	186.323	-0.360932	0	4.38312	0	-81.7785	-137.418	-17.398	2.35764	0.0116293	0	-0.169425	1.1441	0	0.971481	0	-0.310185	0	0	0	0	0.0419591	0.772083	9.58907	0	0	0	0	0	0	0	-0.51	0.57	-2.46	456.78	133.06	3.88	19.29	0
Glutamic acid	0.1% formic acid water	0.1% formic acid methanol	gradient elution	0.85	1	-0.412609	-0.29	8.64286	181.513	-0.386969	0.177285	-19.313	2.12034	-49.3463	86.6142	198.188	2.45247	0.00983419	0.316832	-0.104615	0.944428	0	0.97149	0	-0.224074	0	0	0	0	0.0377632	0.71972	9.58907	0	0	0	0	0	0	0	-0.05	1.4	-1.87	456.78	148.06	8.05	20.54	1
Lysine	0.1% formic acid water	0.1% formic acid methanol	gradient elution	0.71	1	0.16115	-0.3	1.43333	176.871	-0.259629	1.22222	3.55556	-13.1944	17.5556	4.08586	74.0145	-2.66724	0.00164722	0.285714	-0.0802053	0.674361	2.15039	0.972806	0	2.76768	0	0	0	0	0.0233474	0.606647	4.79454	0	0	0	12.9656	0	0	0	0.5	2.08	-1.6	456.78	147.11	5.99	18.74	0
Arginine	0.1% formic acid water	0.1% formic acid methanol	gradient elution	0.75	1	0.561046	0.16	2.80556	179.105	-0.208656	-0.739645	11.78	26.3079	-58.3964	91.4679	41.1409	-1.50151	0.0136703	-0.0753466	-0.0466721	0.941005	0.851054	0.972728	0	1.37579	0	0	3.6796	0	0.0314694	0.67178	9.78694	0	0	0	19.3864	0	0	0	-0.44	1.17	-2.22	456.78	175.12	9.11	22.26	0
Histidine	0.1% formic acid water	0.1% formic acid methanol	gradient elution	0.73	1	0.51216	-0.01	4.19048	179.568	-0.27497	0.3025	-5.77778	1.17361	-71.6	-105.157	58.7578	1.89288	0.00298234	0.552511	-0.123024	0.886498	0	0.972873	0	0.287037	0	2.76847	0	0	0.0196215	0.828206	4.79454	0	0	0	0	6.19684	0	0	-0.54	0.28	-1.91	456.78	156.08	5.04	14.6	0
Citrulline	0.1% formic acid water	0.1% formic acid methanol	gradient elution	0.87	1	-0.573781	-0.39	3	178.858	-0.269396	0.16	0.810578	45.5554	-38.472	-21.8523	46.9787	1.06057	0.013287	0.0208333	-0.066654	0.896729	0.980287	0.971489	0	1.19676	0	0	0	0	0.0314694	0.687895	4.79454	0	0	0	19.3864	0	0	0	-0.54	0.87	-2.92	456.78	176.1	7.6	24.14	0
Taurine	0.1% formic acid water	0.1% formic acid methanol	gradient elution	0.81	1	-0.734409	-0.86	0	184.918	0.274994	0	0	0	-63.9388	125.792	-57.6948	0.488671	0.00701129	0	-0.187146	1.21226	0	0.968528	0	-0.383102	0	0	0	0	0.0505076	0.75513	4.55275	0	0	0	0	0	0	0	0.11	1.25	-1.79	456.78	126.02	3.57	10.55	1
Aspartic acid	0.1% formic acid water	0.1% formic acid methanol	gradient elution	0.82	1	-0.504602	-0.44	0	185.095	-0.407537	0	2.88292	0	-69.8906	-117.694	46.8817	1.67049	0.0133137	0	-0.150448	1.083	0	0.971481	0	-0.532407	0	0	0	0	0.0419591	0.75299	9.58907	0	0	0	0	0	0	0	-0.2	0.87	-2.4	456.78	134.05	2.79	21.36	0
Tyrosine	0.1% formic acid water	0.1% formic acid methanol	gradient elution	4.3	19.2933	0.297329	0.14	3.51613	167.88	-0.290316	0.767361	-9.83922	28.5537	-74	-214.017	199.551	-7.94974	0.00320108	0.13194	-0.0847118	0.844114	1.07785	0.972817	0	0.273426	0	0	0	0	0.0247684	0.721847	4.79454	5.74951	0	5.74951	0	12.1327	0	0	-0.58	-0.16	-1.86	473.61	182.08	4.34	23.28	0
Hypotaurine	0.1% formic acid water	0.1% formic acid methanol	gradient elution	0.82	1	-0.449968	-0.48	0	184.918	0.209276	0	0	0	-38.6391	109.154	-29.781	0.569958	0.00335309	0	-0.195251	1.14817	0	0.972911	0	0.46142	0	0	0	0	0.0240263	0.792124	0	0	0	0	0	0	0	0	0.02	0.84	-1.88	456.78	110.03	5.56	19	1
L-Hydroxyproline	0.1% formic acid water	0.1% formic acid methanol	gradient elution	0.83	1	-0.281286	-0.07	0	185.051	-0.400291	0	1.21408	0	-57	-45.8895	-60.5483	2.15365	0.000677485	0	-0.0570443	0.870699	0	0.972959	0	0.728472	0	0	0	0	0.0239818	0.75264	4.79454	0	0	0	12.9656	0	1	0	0.21	0.21	-2.18	456.78	132.07	3.05	18.5	0
Spermidine	0.1% formic acid water	0.1% formic acid methanol	gradient elution	0.62	1	1.60061	0.47	0.465116	172.353	0.0605035	-0.475624	-1.28864	-1.40785	1.46492	-28.0035	28.3531	-2.84336	-0.000981045	-0.0793651	-0.0851324	0.886785	0.985447	0.987144	0	7.08338	0	0	0	0	-8.88e-17	0.439083	0	0	0	0	0	0	0	0	1.49	2.68	-1.89	456.78	146.17	1.9	19.87	0
N-omiga-acetylhistamine	0.1% formic acid water	0.1% formic acid methanol	gradient elution	1.01	1	1.11861	0.79	3.375	170.64	0.141687	0.5	-1.48646	-4.16208	-108.967	321.703	104.971	-0.182039	0.00368699	0.0827068	0.0116427	1.42407	1.03534	0.972968	0	1.46935	0	2.94846	0	0	0.0115018	0.728783	4.79454	0	0	0	6.54476	12.5242	0	0	-0.11	0.61	-2.03	456.78	154.1	4.66	14.64	0
L-pyroglutamic acid	0.1% formic acid water	0.1% formic acid methanol	gradient elution	0.81	1	-0.286424	-0.52	0	185.007	-0.504649	0	0	0	-50.1875	43.7405	-14.2835	1.35384	0.00711642	0	-0.000584856	0.965489	0	0.972787	0	0.768981	0	0	0	0	0.0239818	0.755265	4.79454	0	0	0	12.8416	0	1	0	0.03	0.27	-1.92	456.78	130.05	7.17	21.17	0
Tyramine	0.1% formic acid water	0.1% formic acid methanol	gradient elution	2.73	9.036	0.379913	0	1.04762	173.041	-0.00213992	1.13379	7.05329	-6.54371	-27.737	-62.072	-91.5163	-2.59498	0.00106733	0.515464	-0.0525485	0.941397	4.08884	0.987822	0	1.53279	0	0	0	0	0.00885151	0.687949	0	5.74951	0	5.74951	12.2943	12.1327	0	0	0.76	0.64	-1.3	464.57	138.09	2.6	18.57	0
Histamine	0.1% formic acid water	0.1% formic acid methanol	gradient elution	0.66	1	0.578425	0.69	0	182.607	0.128306	0	0.715302	0	-32.1488	-0.949554	-137.239	2.02706	-3.71e-05	0	-0.119711	0.938476	0	0.987943	0	1.57162	0	2.94694	0	0	-0.00220476	0.757906	0	0	0	0	6.54476	12.5242	0	0	0.15	0.52	-1.69	456.78	112.09	4.89	18.47	0
AaC	0.1% formic acid water	0.1% formic acid methanol	gradient elution	8.33	45.6227	0.684758	0.83	1.96154	162.88	0.146992	3.60681	-1.57745	-1.67113	-31.3875	15.0306	-109.367	-5.02864	0.00641062	0.542045	-0.12069	1.21336	1.00514	0.993852	0	0	0	3.22769	0	0	0.00506264	0.581567	0	0	0	0	5.81786	0	0	0	-0.51	-1.81	-0.59	493.07	184.09	2.51	12.59	0
IQx	0.1% formic acid water	0.1% formic acid methanol	gradient elution	5.76	28.832	0.866136	0.76	1.84375	172.366	0.0162182	3.5625	-5.28337	0.127315	-17.4444	-134.658	-110.419	1.36099	0.00422157	0.446475	-0.0245659	1.15317	0.407619	0.992546	0	0	0	0	0	0	0.00955711	0.704411	9.96796	0	0	0	5.94834	12.3937	0	0	-0.84	-1.44	-1.36	481.22	200.09	8.8	14.84	0
MeAaC	0.1% formic acid water	0.1% formic acid methanol	gradient elution	9.17	51.1107	0.510666	0.95	1.71429	160.865	0.0545901	5.56509	-1.16457	-0.829882	-35	-364.037	150.544	-5.79105	0.00534724	0.422697	-0.281273	1.11919	0.665968	0.992526	0	0	0	3.25491	0	0	0.0106796	0.661372	0	0	6.92374	0	5.81786	0	0	0	-0.5	-1.96	-0.52	496.57	198.1	2.95	12.56	0
8-MeIQx	0.1% formic acid water	0.1% formic acid methanol	gradient elution	6.57	34.124	0.640848	0.77	1.82927	168.51	-0.0121457	7.81893	-1.98217	-7.89712	-41.2442	-384.006	-240.894	-0.460649	0.00429773	0.523993	-0.0419453	1.28946	0.879974	0.992546	0	0	0	0	0	0	0.0155944	0.703025	4.98398	0	6.92374	0	5.94834	6.19684	0	0	-0.94	-1.56	-1.33	485.15	214.11	7.72	15.22	0
MeIQ	0.1% formic acid water	0.1% formic acid methanol	gradient elution	5.76	28.832	0.979287	0.83	1.16981	167.004	0.00823206	4.08163	0.403061	0.413265	-24	-305.586	-929.345	-10.6339	0.005709	0.386473	-0.183861	1.15048	0.417761	0.992544	0	0	0	0	0	0	0.0145421	0.693166	4.98398	0	6.92374	0	5.94834	6.19684	0	0	-0.48	-1.41	-1.02	481.22	213.11	9.17	16.13	0
IQ[4,5-b]	0.1% formic acid water	0.1% formic acid methanol	gradient elution	6.61	34.3853	1.19572	0.78	2.6	160.132	0.102611	6.232	-3.88071	-0.0924444	-22.3744	-282.441	411.565	-12.6158	0.0072498	0.470411	-0.127017	1.09071	0.528921	0.992546	0	0	0	0	0	0	0.0106796	0.667055	0	0	0	0	11.5955	0	0	0	-0.95	-1.6	-1.26	485.34	199.1	10.84	16.69	0
Harman	0.1% formic acid water	0.1% formic acid methanol	gradient elution	7.43	39.7427	1.39951	1.06	1.45161	162.332	-0.147276	3.9375	-1.09274	2.32557	-26	-87.8478	-263.891	-8.21315	-0.000671716	0.931034	0.0601656	1.19402	0	0.993878	0	0	0	3.38375	0	0	0.00386002	0.61804	4.98398	0	6.92374	0	0	0	0	0	0.04	-1.58	-0.53	489.12	183.09	4.55	16.34	0
IQ	0.1% formic acid water	0.1% formic acid methanol	gradient elution	5.4	26.48	1.17252	0.89	1.68571	166.537	-0.00633223	3.1312	-2.95182	-0.471467	-19.1744	-120.622	-181.98	-9.63379	0.00659881	0.393921	-0.123164	1.20767	0.486488	0.992546	0	0	0	0	0	0	0.00955711	0.679819	4.98398	0	0	0	5.94834	6.19684	0	0	-0.41	-1.36	-1.02	479.41	199.1	8.83	15.75	0
Norharman	0.1% formic acid water	0.1% formic acid methanol	gradient elution	6.96	36.672	1.15794	1.02	1.77273	167.047	-0.0911327	0.655329	-0.223923	0.393109	-21.7959	43.0066	-221.607	-3.45951	-0.00147856	1.22458	0.0112688	0.887975	0	1.7516	0	0	0	3.31546	0	0	-0.00271355	0.558507	4.98398	0	0	0	0	0	0	0	-0.06	-1.48	-0.6	486.98	169.08	4.61	16.32	0
DMIP	0.1% formic acid water	0.1% formic acid methanol	gradient elution	5.1	24.52	1.05608	0.94	0.125	163.631	0.11134	2.42975	1.11111	2.66667	-54.0331	-558.981	13.6029	-16.5283	0.00799472	0.590361	-0.333732	1.0747	0	0.992546	0	0	0	0	0	0	0.0193894	0.732239	0	0	6.92374	0	11.5955	6.19684	0	0	-0.73	-0.6	-1.41	477.87	163.1	9.99	17.5	0
Phe-p-1	0.1% formic acid water	0.1% formic acid methanol	gradient elution	7.18	38.1093	1.23473	1.05	2.53846	162.062	-0.0397603	0.964083	-1.98173	-1.03592	-43.1739	-37.7978	172.434	-8.27026	0.00354391	0.152057	-0.0635823	1.05992	1.42371	0.99385	0	0	0	0	0	0	0.00415694	0.499656	0	11.1269	0	0	5.81786	6.19684	0	0	-0.01	-1.31	-0.51	487.99	171.09	3.22	14.9	0
PhIP	0.1% formic acid water	0.1% formic acid methanol	gradient elution	7.86	42.552	1.69487	0.83	3.55814	159.92	0.107045	-1.02021	1	-3	-28.409	-197.079	416.339	-12.8847	0.00574838	-0.0536384	-0.118507	0.957673	1.15047	0.992546	0	0	0	0	0	0	0.00942314	0.623992	0	11.1269	0	0	11.5955	0	0	0	-1.1	-2.09	-1.18	491.03	225.11	10.11	15.87	0
7,8-DiMeIQx	0.1% formic acid water	0.1% formic acid methanol	gradient elution	7.25	38.5667	1.17708	0.86	1.86	165.806	-0.0452133	-2.17	-4.19506	-4.93741	-37	-393.581	48.3821	-8.11469	0.00432243	-0.108122	-0.00311479	1.41426	1.1293	0.992526	0	0	0	0	0	0	0.019931	0.647383	0	0	13.8475	0	5.94834	0	0	0	-1.03	-1.7	-1.3	488.31	228.12	6.62	15.48	0
Sarcosine	0.1% formic acid water	0.1% formic acid methanol	gradient elution	0.81	1	0.14874	-0.22	0	184.918	-0.0870714	0	0	0	-31.4142	102.506	-139.296	0.647508	0.00144374	0	0.0438904	0.979599	0	0.972911	0	0.0416667	0	0	0	0	0.0240263	0.758664	4.79454	0	0	0	0	7.04767	0	0	1.03	1.7	-1.4	456.78	90.06	2.92	24.65	0
Creatinine	0.1% formic acid water	0.1% formic acid methanol	gradient elution	0.89	1	1.13211	0.27	0	0	0.152068	0	0	0	-90	0	354.201	0	0.0113129	0	-0.314768	1.21391	0	0.977938	0	0.325231	0	0	3.45139	1.59954	0.0269795	0.733849	4.79454	0	0	0	12.5043	11.9476	1	0	-0.85	-0.34	-2.16	456.78	114.07	11.98	15.98	0
L-Dihydroorotic acid	0.1% formic acid water	0.1% formic acid methanol	gradient elution	1.01	1	-1.62566	-1.33	0	187.676	-0.668696	0	2.87668	0	-93.699	-261.215	52.8209	2.2227	0.023258	0	0.00627894	1.17376	0	0.972618	0	-0.207269	0	0	0	0	0.0292718	0.789096	10.1113	0	0	0	0	0	0	1	-0.28	-0.17	-2.23	456.78	159.04	5.18	17.25	0
L-Carnosine	0.1% formic acid water	0.1% formic acid methanol	gradient elution	0.75	1	-0.00900211	-0.78	4.07273	169.76	-0.217252	0.471111	-6.65895	-14.0108	-64	-135.378	-24.5087	-9.90795	0.00368761	0.0268763	-0.0283864	1.01613	1.00508	0.972726	0	0.486737	0	2.7773	0	0	0.017749	0.74402	4.79454	0	0	0	5.69393	0	0	0	-0.98	0.05	-3.29	456.78	227.11	12.99	20.43	0
Uric acid	0.1% formic acid water	0.1% formic acid methanol	gradient elution	1.88	3.48267	0.285252	-0.91	9	185.184	0.250054	0	0	0	-88.5	16.056	25.4208	1.01156	0.0348402	0	-0.116719	1.36475	0	0.976844	0	0	0	8.70546	0	0	0.0207925	0.586893	24.7305	0	0	0	0	0	0	0	-0.98	-1.76	-2.7	459.26	169.04	4.89	20.01	0
Betaine	0.1% formic acid water	0.1% formic acid methanol	gradient elution	0.87	1	1.09557	0.38	0	0	0.225178	0	0	0	-195.141	0	-361.885	0	-0.00155603	0	-0.418567	0.585225	0	0.97275	0	0.0694444	0	0	0	0	0.0622139	0.469603	0	0	0	0	4.48303	21.143	0	0	-2.41	0.21	-2.88	456.78	118.09	15.35	14.25	0
Cytosine	0.1% formic acid water	0.1% formic acid methanol	gradient elution	0.9	1	0.916783	0.25	0	0	0.333051	0	0	0	-59.5266	0	103.863	0	0.025124	0	-0.23766	1.29445	0	0.977719	0	0	0	2.28125	0	0	0.015815	0.795208	4.98398	0	0	0	5.81786	0	0	0	-0.79	-1.16	-2.53	456.78	244.09	12.89	18.33	0
Hypoxanthine	0.1% formic acid water	0.1% formic acid methanol	gradient elution	2.08	4.78933	0.173061	-0.06	0	184.918	-0.0837538	0	0	0	8	227.824	-171.705	0.962155	0.00358131	0	-0.178483	0.936594	0	0.977857	0	0	0	5.09292	0	0	0.00372035	0.728136	4.79454	0	0	0	11.1639	0	0	0	-0.64	-1.16	-2.06	460.54	269.09	2.51	11.33	0
Xanthine	0.1% formic acid water	0.1% formic acid methanol	gradient elution	2.5	7.53333	-0.530783	-0.37	0	185.095	0.0136869	0	0	0	-39.08	-23.5938	51.4977	0.85468	0.0206783	0	-0.142003	1.21659	0	0.977215	0	0	0	7.00843	0	0	0.0130324	0.726429	14.7625	0	0	0	0	0	0	0	-0.59	-1.12	-2	463.17	285.08	6.06	22.93	0
Guanine	0.1% formic acid water	0.1% formic acid methanol	gradient elution	1.52	1.13067	0.399245	0.06	0	183.104	0.252645	0	6.0434	0	-34.5625	-126.049	-267.038	0.929041	0.017625	0	-0.158414	1.18512	0	0.977827	0	0	0	4.98125	0	0	0.0130324	0.739928	9.77852	0	0	0	11.1639	0	0	0	-0.96	-1.63	-2.61	456.91	284.1	3.28	13.86	0
Uracil	0.1% formic acid water	0.1% formic acid methanol	gradient elution	1.49	1	-0.312577	-0.62	0	0	0.20339	0	0	0	-49.0833	0	51.7353	0	0.0294644	0	-0.145434	1.43607	0	0.977161	0	0	0	4.26444	0	0	0.015815	0.746961	9.77852	0	0	0	0	0	0	0	-0.14	-0.31	-1.67	456.78	113.04	6.46	24.76	0
Adenine	0.1% formic acid water	0.1% formic acid methanol	gradient elution	1.45	1	1.0545	0.52	0	184.918	-0.079507	0	0	0	-9.66667	256.043	-97.6406	0.874208	0.00452556	0	-0.225925	0.799775	0	0.99388	0	0	0	2.82671	0	0	0.00372035	0.726429	0	0	0	0	16.9817	0	0	0	-0.75	-1.26	-2.24	456.78	268.1	11.17	15	0
Beta-Thymidine	0.1% formic acid water	0.1% formic acid methanol	gradient elution	4.95	23.54	-1.41753	-1.71	3.76786	167.29	0.287893	2.82726	-4.76015	-3.13025	-46.2508	-217.644	116.213	0.246177	0.00686201	0.128257	-0.297668	1.07617	1.14028	0.977251	0	-0.105784	0	2.15934	0	0	0.0229493	0.706637	14.3456	0	6.92374	0	5.56345	6.92374	1	0	-0.98	-1.1	-1.84	477.09	243.1	4.01	45.1	0
Cytidine	0.1% formic acid water	0.1% formic acid methanol	gradient elution	1.06	1	-0.732819	-0.7	4.16327	169.415	0.0668159	-2.00556	7.58074	-8.60617	-0.142222	-162.492	114.67	-4.55627	0.00237271	-0.114785	-0.173472	0.958414	0.945774	0.977702	0	-0.452502	0	0	0	0	0.0219589	0.743214	4.5671	0	0	0	0	0	1	0	-0.86	-1.38	-3.27	456.78	112.05	6.86	45.67	0
Inosine	0.1% formic acid water	0.1% formic acid methanol	gradient elution	4.18	18.5093	-1.33093	-1.24	5.35714	169.805	-0.101128	-2.70968	7.21745	-2.62545	37.0198	105.495	-117.475	2.62073	-0.0026822	-0.123529	-0.15604	0.923862	1.12176	0.977719	0	-0.421262	0	2.38292	0	0	0.0149466	0.729478	9.36164	0	0	0	0	0	1	0	-1.81	-2.31	-2.91	472.95	137.05	9.42	29.87	0
Xanthosine	0.1% formic acid water	0.1% formic acid methanol	gradient elution	4.65	21.58	-1.27159	-1.15	5.96667	169.774	0.140549	-3.3125	11.7093	-7.90332	-5.75	-0.995879	79.4792	1.15486	0.00466733	-0.12619	-0.13932	0.981139	1.27513	0.977214	0	-0.47375	0	4.40017	0	0	0.0195069	0.73973	19.3296	0	0	0	0	0	1	0	-1.76	-2.15	-2.78	475.5	153.04	15.45	32.43	0
Guanosine	0.1% formic acid water	0.1% formic acid methanol	gradient elution	4.21	18.7053	-0.939543	-0.56	5.45161	170.413	0.270673	-7.46281	14.5278	-6.16667	0.200184	-141.2	-123.263	0.0426856	0.00370835	-0.257265	-0.134567	0.991755	1.1482	0.977701	0	-0.446918	0	2.29959	0	0	0.390138	0.744966	14.3456	0	0	0	0	0	1	0	-2.13	-2.67	-3.19	473.12	152.06	11.43	36.02	0
Adenosine	0.1% formic acid water	0.1% formic acid methanol	gradient elution	4.23	18.836	-0.230974	0.13	4.86207	170.386	-0.089798	-3.91895	5.23438	-3.44618	23.1875	108.274	-131.049	1.21257	-0.00231705	-0.159468	-0.169932	0.942973	0.96672	0.987734	0	-0.390397	0	0	0	0	0.0149466	0.723325	4.5671	0	0	0	11.1639	0	1	0	-0.92	-1.6	-1.84	473.23	136.06	2.18	39.95	0

## Sheet: RF-MC
Compounds	Mobile phase A	Mobile phase B	Elution conditions	Peak time	B%	predicted_values	true_values	AATS6dv	AATS6i	ATSC4c	ATSC8d	ATSC7s	ATSC8s	ATSC3Z	ATSC6m	ATSC5v	ATSC6i	AATSC2c	MATS8d	MATS3i	GATS3se	GATS8se	BCUTd-1l	Xc-6d	SssCH2	SdsCH	SaaNH	SdsN	SsssN	AETA_eta_B	BIC1	PEOE_VSA2	SMR_VSA9	SlogP_VSA4	SlogP_VSA11	EState_VSA3	EState_VSA6	n5AHRing	n6AHRing	ln(gamma)	Total mean interaction energy in the mix (H_int)	H-Bond interaction energy in the mix (H_HB)	Solvent_density	M+1	Dipole moment t_value	PKA(25,MeCN)	Sulfur Count
D-Pantothenic acid	Pure water	Pure methanol	gradient elution	1.7	2.30667	-0.904875	-0.9	3.1875	165.167	0.172518	-2.9834	32.1706	-3.39523	-98.1133	112.195	197.571	-4.13803	0.00179049	-0.118086	-0.348219	0.850036	0.967632	0.972576	0.117851	-0.56422	0	0	0	0	0.0403765	0.626558	9.58907	0	5.41499	0	0	0	0	0	0.19	1.49	-2.76	457.6	220.12	7.46	23.15	0
Niacinamide	Pure water	Pure methanol	gradient elution	4.21	18.7053	0.408006	0.76	0	176.484	0.12616	0	2.37136	0	-33.3556	-51.3149	111.629	0.917752	0.00515938	0	-0.381849	1.13373	0	0.97302	0	0	0	0	0	0	0.012187	0.73139	9.77852	0	0	0	5.56345	18.3296	0	0	-0.2	-0.07	-1.19	472.68	123.06	2.95	12.91	0
Pyridoxal	Pure water	Pure methanol	gradient elution	3.4	13.4133	0.563374	1.03	0.25	173.88	-0.0880824	0.979592	-3.84511	3.97298	2.18821	-133.402	-158.857	0.491843	-0.003459	0.521739	-0.147566	0.752946	0	0.957469	0	-0.296713	0.509491	0	0	0	0.0176922	0.78577	9.77852	5.74951	6.92374	5.74951	17.5435	6.92374	0	0	0.32	0.24	-1.52	468.09	168.07	3.53	18.08	0
Biotin	Pure water	Pure methanol	gradient elution	5.13	24.716	0.035403	-1.01	1.73457	166.727	-0.0469806	-2.05078	-22.899	-9.19049	-119.098	-237.505	61.8081	-0.0757756	0.00826852	-0.104895	-0.135185	0.866324	1.40842	0.972733	0	3.84562	0	0	0	0	0.0155944	0.604004	4.79454	0	0	0	5.24994	0	2	0	-1.32	-0.66	-1.95	477.61	245.1	8.59	24.78	1
Pyridoxine	Pure water	Pure methanol	gradient elution	4.51	20.6653	1.06926	1.55	0.16129	177.19	-0.0286503	0.816635	-1.19975	2.91367	17.586	11.4992	-346.724	4.7732	-0.00287479	0.455696	-0.145423	0.711448	0	0.987195	0	-0.512083	0	0	0	0	0.0176922	0.681116	4.98398	5.74951	6.92374	5.74951	16.8208	6.92374	0	0	-0.46	-0.41	-1.73	474.32	170.08	9.44	32	0
Pyridoxamine	Pure water	Pure methanol	gradient elution	4.7	21.9067	0.890198	1.31	0.131579	179.43	-0.0324451	0.75	0.310957	2.22454	32.375	21.124	-584.022	7.83375	-0.00221284	0.428571	-0.144951	0.724291	0	0.987195	0	0.0679167	0	0	0	0	0.0176922	0.739481	4.98398	5.74951	6.92374	5.74951	16.8208	6.92374	0	0	-0.41	-0.4	-1.81	475.34	169.1	2.37	18.04	0
Nicotinic acid	Pure water	Pure methanol	gradient elution	0.98	1	0.205446	0.68	0	177.102	0.151025	0	1.71485	0	-13.7755	-76.6296	87.6328	1.3341	0.00526081	0	-0.379721	0.847878	0	0.97302	0	0	0	0	0	0	0.012187	0.741757	4.98398	0	0	0	0	6.06637	0	0	1.42	0.98	-1.28	456.28	124.04	0.88	20.67	0
Glycine	Pure water	Pure methanol	gradient elution	0.8	1	-0.36701	-0.68	0	0	-0.23662	0	0	0	-18	0	67.9816	0	0.00646842	0	0.00697033	1.1298	0	0.972633	0	-0.277778	0	0	0	0	0.0288316	0.879588	4.79454	0	0	0	0	0	0	0	0.42	1.18	-1.56	456.28	76.04	1.77	14.8	0
Alanine	Pure water	Pure methanol	gradient elution	0.82	1	-0.191786	0.12	0	0	-0.300229	0	0	0	-26.5917	0	158.987	0	0.00448718	0	-0.145146	0.920777	0	0.972646	0	0	0	0	0	0	0.0452465	0.792124	4.79454	0	0	0	0	0	0	0	0.84	1.55	-1.5	456.28	90.06	1.93	15.51	0
Leucine	Pure water	Pure methanol	gradient elution	2.04	4.528	0.324062	0.61	0	182.681	-0.243313	0	3.94249	0	-48.6446	-337.533	-268.032	6.87103	0.00200733	0	-0.212961	0.679665	0	0.972732	0	0.550926	0	0	0	0	0.0419591	0.620628	4.79454	0	5.91791	0	12.3387	0	0	0	1.58	2.22	-1.29	459.8	132.1	1.75	23.12	0
Isoleucine	Pure water	Pure methanol	gradient elution	1.89	3.548	0.324532	0.5	0	183.24	-0.209198	0	1.97125	0	6.35537	-58.3046	156.045	5.01987	0.00165898	0	-0.157321	0.656972	0	0.972768	0	0.812963	0	0	0	0	0.0358656	0.620628	4.79454	0	5.91791	0	0	0	0	0	1.68	2.28	-1.26	458.83	132.1	1.86	24.73	0
Valine	Pure water	Pure methanol	gradient elution	1.04	1	0.213693	0.43	0	184.918	-0.199833	0	0	0	-24.6981	159.61	98.2167	1.90852	0.00210128	0	-0.306527	0.701903	0	0.97275	0	0	0	0	0	0	0.0450994	0.653082	4.79454	0	5.91791	0	0	13.8475	0	0	1.05	2.27	-0.96	456.28	118.09	7.95	13.49	0
Proline	Pure water	Pure methanol	gradient elution	0.96	1	0.327674	0.62	0	184.918	-0.108799	0	0	0	-17.8858	132.916	-146.36	1.58933	0.00115071	0	-0.0232467	0.687688	0	0.973023	0	2.64213	0	0	0	0	0.0137104	0.674795	4.79454	0	0	0	0	0	1	0	1.16	0.95	-1.39	456.28	116.07	3.61	21.36	0
Phenylalanine	Pure water	Pure methanol	gradient elution	4.4	19.9467	0.159186	0.34	2.9	168.347	-0.271772	1.38374	-12.174	-5.11494	-47.5312	-68.6233	75.7902	-6.16042	0.00160522	0.387302	-0.0559979	0.729389	1.70862	0.972872	0	0.385093	0	0	0	0	0.0179864	0.677269	4.79454	0	0	0	6.42082	0	0	0	0.05	0.3	-1.22	473.72	166.09	2.66	22.91	0
Methionine	Pure water	Pure methanol	gradient elution	1.4	1	-0.0417441	0.24	0.6875	170.668	-0.285717	0.3675	-19.2941	2.07871	-66	-146.383	212.133	-3.99597	0.00183107	0.28655	-0.112273	0.829346	0	0.972807	0	1.36505	0	0	0	0	0.0259416	0.699208	4.79454	0	0	0	6.42082	11.7619	0	0	1.24	2.08	-1.52	456.28	150.06	4.25	22.93	1
Tryptophan	Pure water	Pure methanol	gradient elution	5.36	26.2187	-0.205344	-0.08	4	167.646	-0.358401	2.4952	-10.8272	-11.9136	-41	131.282	-111.107	-3.61455	0.00129651	0.217584	-0.0621933	0.737639	1.96944	0.97287	0	0.346574	0	3.08396	0	0	0.0155115	0.728807	4.79454	0	0	0	6.42082	0	0	0	-0.71	-0.62	-1.37	478.79	205.1	5.34	22.25	0
Serine	Pure water	Pure methanol	gradient elution	0.8	1	-0.456438	-0.42	0	184.918	-0.0793225	0	0	0	0	42.2324	150.707	0.184897	0.000371321	0	-0.155377	0.844324	0	0.972823	0	-0.50463	0	0	0	0	0.0333535	0.835752	4.79454	0	0	0	0	0	0	0	0.59	1.41	-1.57	456.28	106.05	3.06	19.55	0
Glutamine	Pure water	Pure methanol	gradient elution	0.83	1	-0.476434	-0.02	5.82353	183.925	-0.369256	0.32	-23.3139	3.29389	-64.08	59.0726	203.805	3.47946	0.00893018	0.296296	-0.117783	1.0135	0	0.97149	0	0.123148	0	0	0	0	0.0377632	0.737981	9.58907	0	0	0	0	0	0	0	-0.22	0.89	-2.44	456.28	147.08	6.95	22.19	0
Threonine	Pure water	Pure methanol	gradient elution	0.83	1	-0.289963	-0.19	0	184.918	-0.0112833	0	0	0	-29.827	143.955	132.723	0.966889	0.00134405	0	-0.172276	1.00328	0	0.97275	0	0	0	0	0	0	0.0450994	0.775358	4.79454	0	0	0	0	0	0	0	1	1.7	-1.63	456.28	120.07	4	17.53	0
Cysteine	Pure water	Pure methanol	gradient elution	0.87	1	-0.601382	-1.13	0	184.918	-0.191786	0	0	0	11.3469	58.4591	145.624	0.439189	0.00259616	0	-0.10926	0.859568	0	0.972823	0	0.189815	0	0	0	0	0.0333535	0.873274	4.79454	0	0	0	0	0	0	0	1.02	1.64	-1.19	456.28	122.03	3.06	20.11	1
Asparagine	Pure water	Pure methanol	gradient elution	0.81	1	-0.588779	-0.64	0	186.323	-0.360932	0	4.38312	0	-81.7785	-137.418	-17.398	2.35764	0.0116293	0	-0.169425	1.1441	0	0.971481	0	-0.310185	0	0	0	0	0.0419591	0.772083	9.58907	0	0	0	0	0	0	0	-0.51	0.57	-2.46	456.28	133.06	3.88	19.29	0
Glutamic acid	Pure water	Pure methanol	gradient elution	0.6	1	-0.544059	-0.76	8.64286	181.513	-0.386969	0.177285	-19.313	2.12034	-49.3463	86.6142	198.188	2.45247	0.00983419	0.316832	-0.104615	0.944428	0	0.97149	0	-0.224074	0	0	0	0	0.0377632	0.71972	9.58907	0	0	0	0	0	0	0	-0.05	1.4	-1.87	456.28	148.06	8.05	20.54	1
Lysine	Pure water	Pure methanol	gradient elution	1.4	1	0.0142927	0.34	1.43333	176.871	-0.259629	1.22222	3.55556	-13.1944	17.5556	4.08586	74.0145	-2.66724	0.00164722	0.285714	-0.0802053	0.674361	2.15039	0.972806	0	2.76768	0	0	0	0	0.0233474	0.606647	4.79454	0	0	0	12.9656	0	0	0	0.51	2.08	-1.6	456.28	147.11	5.99	18.74	0
Arginine	Pure water	Pure methanol	gradient elution	1.5	1	0.391962	1.31	2.80556	179.105	-0.208656	-0.739645	11.78	26.3079	-58.3964	91.4679	41.1409	-1.50151	0.0136703	-0.0753466	-0.0466721	0.941005	0.851054	0.972728	0	1.37579	0	0	3.6796	0	0.0314694	0.67178	9.78694	0	0	0	19.3864	0	0	0	-0.43	1.17	-2.23	456.28	175.12	9.11	22.26	0
Histidine	Pure water	Pure methanol	gradient elution	1.35	1	0.215306	1.03	4.19048	179.568	-0.27497	0.3025	-5.77778	1.17361	-71.6	-105.157	58.7578	1.89288	0.00298234	0.552511	-0.123024	0.886498	0	0.972873	0	0.287037	0	2.76847	0	0	0.0196215	0.828206	4.79454	0	0	0	0	6.19684	0	0	-0.54	0.29	-1.91	456.28	156.08	5.04	14.6	0
Citrulline	Pure water	Pure methanol	gradient elution	0.87	1	-0.555583	-0.27	3	178.858	-0.269396	0.16	0.810578	45.5554	-38.472	-21.8523	46.9787	1.06057	0.013287	0.0208333	-0.066654	0.896729	0.980287	0.971489	0	1.19676	0	0	0	0	0.0314694	0.687895	4.79454	0	0	0	19.3864	0	0	0	-0.54	0.87	-2.92	456.28	176.1	7.6	24.14	0
Taurine	Pure water	Pure methanol	gradient elution	0.8	1	-0.907664	-1.43	0	184.918	0.274994	0	0	0	-63.9388	125.792	-57.6948	0.488671	0.00701129	0	-0.187146	1.21226	0	0.968528	0	-0.383102	0	0	0	0	0.0505076	0.75513	4.55275	0	0	0	0	0	0	0	0.11	1.25	-1.79	456.28	126.02	3.57	10.55	1
Aspartic acid	Pure water	Pure methanol	gradient elution	0.6	1	-0.539484	-1.3	0	185.095	-0.407537	0	2.88292	0	-69.8906	-117.694	46.8817	1.67049	0.0133137	0	-0.150448	1.083	0	0.971481	0	-0.532407	0	0	0	0	0.0419591	0.75299	9.58907	0	0	0	0	0	0	0	-0.2	0.87	-2.4	456.28	134.05	2.79	21.36	0
Tyrosine	Pure water	Pure methanol	gradient elution	5.2	25.1733	0.312571	0.83	3.51613	167.88	-0.290316	0.767361	-9.83922	28.5537	-74	-214.017	199.551	-7.94974	0.00320108	0.13194	-0.0847118	0.844114	1.07785	0.972817	0	0.273426	0	0	0	0	0.0247684	0.721847	4.79454	5.74951	0	5.74951	0	12.1327	0	0	-0.75	-0.33	-1.8	477.97	182.08	4.34	23.28	0
Hypotaurine	Pure water	Pure methanol	gradient elution	0.82	1	-0.661356	-0.93	0	184.918	0.209276	0	0	0	-38.6391	109.154	-29.781	0.569958	0.00335309	0	-0.195251	1.14817	0	0.972911	0	0.46142	0	0	0	0	0.0240263	0.792124	0	0	0	0	0	0	0	0	0.03	0.84	-1.88	456.28	110.03	5.56	19	1
L-Hydroxyproline	Pure water	Pure methanol	gradient elution	0.84	1	-0.225628	0.02	0	185.051	-0.400291	0	1.21408	0	-57	-45.8895	-60.5483	2.15365	0.000677485	0	-0.0570443	0.870699	0	0.972959	0	0.728472	0	0	0	0	0.0239818	0.75264	4.79454	0	0	0	12.9656	0	1	0	0.21	0.21	-2.18	456.28	132.07	3.05	18.5	0
N-omiga-acetylhistamine	Pure water	Pure methanol	gradient elution	4.6	21.2533	1.18657	1.64	3.375	170.64	0.141687	0.5	-1.48646	-4.16208	-108.967	321.703	104.971	-0.182039	0.00368699	0.0827068	0.0116427	1.42407	1.03534	0.972968	0	1.46935	0	2.94846	0	0	0.0115018	0.728783	4.79454	0	0	0	6.54476	12.5242	0	0	-0.89	0.05	-1.73	474.8	154.1	4.66	14.64	0
L-pyroglutamic acid	Pure water	Pure methanol	gradient elution	0.83	1	-0.59616	-0.34	0	185.007	-0.504649	0	0	0	-50.1875	43.7405	-14.2835	1.35384	0.00711642	0	-0.000584856	0.965489	0	0.972787	0	0.768981	0	0	0	0	0.0239818	0.755265	4.79454	0	0	0	12.8416	0	1	0	0.04	0.28	-1.92	456.28	130.05	7.17	21.17	0
Histamine	Pure water	Pure methanol	gradient elution	4.6	21.2533	0.310006	-0.03	0	182.607	0.128306	0	0.715302	0	-32.1488	-0.949554	-137.239	2.02706	-3.71e-05	0	-0.119711	0.938476	0	0.987943	0	1.57162	0	2.94694	0	0	-0.00220476	0.757906	0	0	0	0	6.54476	12.5242	0	0	-0.53	0.05	-1.46	474.8	112.09	4.89	18.47	0
AaC	Pure water	Pure methanol	gradient elution	10	56.5333	1.0196	1.51	1.96154	162.88	0.146992	3.60681	-1.57745	-1.67113	-31.3875	15.0306	-109.367	-5.02864	0.00641062	0.542045	-0.12069	1.21336	1.00514	0.993852	0	0	0	3.22769	0	0	0.00506264	0.581567	0	0	0	0	5.81786	0	0	0	-0.63	-2.05	-0.55	499.53	184.09	2.51	12.59	0
IQx	Pure water	Pure methanol	gradient elution	7.35	39.22	1.0393	1.68	1.84375	172.366	0.0162182	3.5625	-5.28337	0.127315	-17.4444	-134.658	-110.419	1.36099	0.00422157	0.446475	-0.0245659	1.15317	0.407619	0.992546	0	0	0	0	0	0	0.00955711	0.704411	9.96796	0	0	0	5.94834	12.3937	0	0	-0.94	-1.63	-1.26	488.38	200.09	8.8	14.84	0
MeAaC	Pure water	Pure methanol	gradient elution	10.95	62.74	1.08765	1.49	1.71429	160.865	0.0545901	5.56509	-1.16457	-0.829882	-35	-364.037	150.544	-5.79105	0.00534724	0.422697	-0.281273	1.11919	0.665968	0.992526	0	0	0	3.25491	0	0	0.0106796	0.661372	0	0	6.92374	0	5.81786	0	0	0	-0.63	-2.23	-0.49	503.13	198.1	2.95	12.56	0
8-MeIQx	Pure water	Pure methanol	gradient elution	8.27	45.2307	1.03286	1.68	1.82927	168.51	-0.0121457	7.81893	-1.98217	-7.89712	-41.2442	-384.006	-240.894	-0.460649	0.00429773	0.523993	-0.0419453	1.28946	0.879974	0.992546	0	0	0	0	0	0	0.0155944	0.703025	4.98398	0	6.92374	0	5.94834	6.19684	0	0	-1.05	-1.78	-1.23	492.45	214.11	7.72	15.22	0
MeIQ	Pure water	Pure methanol	gradient elution	8.77	48.4973	1.16161	1.65	1.16981	167.004	0.00823206	4.08163	0.403061	0.413265	-24	-305.586	-929.345	-10.6339	0.005709	0.386473	-0.183861	1.15048	0.417761	0.992544	0	0	0	0	0	0	0.0145421	0.693166	4.98398	0	6.92374	0	5.94834	6.19684	0	0	-0.82	-1.94	-0.88	494.56	213.11	9.17	16.13	0
IQ[4,5-b]	Pure water	Pure methanol	gradient elution	8.9	49.3467	1.06366	1.67	2.6	160.132	0.102611	6.232	-3.88071	-0.0924444	-22.3744	-282.441	411.565	-12.6158	0.0072498	0.470411	-0.127017	1.09071	0.528921	0.992546	0	0	0	0	0	0	0.0106796	0.667055	0	0	0	0	11.5955	0	0	0	-1.04	-1.85	-1.15	495.11	199.1	10.84	16.69	0
Harman	Pure water	Pure methanol	gradient elution	10.5	59.8	1.30514	2.02	1.45161	162.332	-0.147276	3.9375	-1.09274	2.32557	-26	-87.8478	-263.891	-8.21315	-0.000671716	0.931034	0.0601656	1.19402	0	0.993878	0	0	0	3.38375	0	0	0.00386002	0.61804	4.98398	0	6.92374	0	0	0	0	0	-0.28	-2.12	-0.47	501.45	183.09	4.55	16.34	0
IQ	Pure water	Pure methanol	gradient elution	8.09	44.0547	1.22532	1.64	1.68571	166.537	-0.00633223	3.1312	-2.95182	-0.471467	-19.1744	-120.622	-181.98	-9.63379	0.00659881	0.393921	-0.123164	1.20767	0.486488	0.992546	0	0	0	0	0	0	0.00955711	0.679819	4.98398	0	0	0	5.94834	6.19684	0	0	-0.72	-1.82	-0.89	491.67	199.1	8.83	15.75	0
Norharman	Pure water	Pure methanol	gradient elution	10.33	58.6893	1.24926	1.98	1.77273	167.047	-0.0911327	0.655329	-0.223923	0.393109	-21.7959	43.0066	-221.607	-3.45951	-0.00147856	1.22458	0.0112688	0.887975	0	1.7516	0	0	0	3.31546	0	0	-0.00271355	0.558507	4.98398	0	0	0	0	0	0	0	-0.36	-1.99	-0.53	500.8	169.08	4.61	16.32	0
DMIP	Pure water	Pure methanol	gradient elution	7.33	39.0893	1.20039	1.84	0.125	163.631	0.11134	2.42975	1.11111	2.66667	-54.0331	-558.981	13.6029	-16.5283	0.00799472	0.590361	-0.333732	1.0747	0	0.992546	0	0	0	0	0	0	0.0193894	0.732239	0	0	6.92374	0	11.5955	6.19684	0	0	-0.89	-0.84	-1.28	488.29	163.1	9.99	17.5	0
Phe-p-1	Pure water	Pure methanol	gradient elution	10.16	57.5787	1.31529	2.02	2.53846	162.062	-0.0397603	0.964083	-1.98173	-1.03592	-43.1739	-37.7978	172.434	-8.27026	0.00354391	0.152057	-0.0635823	1.05992	1.42371	0.99385	0	0	0	0	0	0	0.00415694	0.499656	0	11.1269	0	0	5.81786	6.19684	0	0	-0.31	-1.81	-0.45	500.15	171.09	3.22	14.9	0
PhIP	Pure water	Pure methanol	gradient elution	10.02	56.664	0.940627	1.68	3.55814	159.92	0.107045	-1.02021	1	-3	-28.409	-197.079	416.339	-12.8847	0.00574838	-0.0536384	-0.118507	0.957673	1.15047	0.992546	0	0	0	0	0	0	0.00942314	0.623992	0	11.1269	0	0	11.5955	0	0	0	-1.18	-2.35	-1.09	499.6	225.11	10.11	15.87	0
7,8-DiMeIQx	Pure water	Pure methanol	gradient elution	9	50	1.14714	1.75	1.86	165.806	-0.0452133	-2.17	-4.19506	-4.93741	-37	-393.581	48.3821	-8.11469	0.00432243	-0.108122	-0.00311479	1.41426	1.1293	0.992526	0	0	0	0	0	0	0.019931	0.647383	0	0	13.8475	0	5.94834	0	0	0	-1.14	-1.95	-1.21	495.52	228.12	6.62	15.48	0
Sarcosine	Pure water	Pure methanol	gradient elution	0.82	1	-0.198846	0.12	0	184.918	-0.0870714	0	0	0	-31.4142	102.506	-139.296	0.647508	0.00144374	0	0.0438904	0.979599	0	0.972911	0	0.0416667	0	0	0	0	0.0240263	0.758664	4.79454	0	0	0	0	7.04767	0	0	1.04	1.7	-1.4	456.28	90.06	2.92	24.65	0
Creatinine	Pure water	Pure methanol	gradient elution	1.4	1	0.898859	1.38	0	0	0.152068	0	0	0	-90	0	354.201	0	0.0113129	0	-0.314768	1.21391	0	0.977938	0	0.325231	0	0	3.45139	1.59954	0.0269795	0.733849	4.79454	0	0	0	12.5043	11.9476	1	0	-0.84	-0.34	-2.16	456.28	114.07	11.98	15.98	0
L-Dihydroorotic acid	Pure water	Pure methanol	gradient elution	4.12	18.1173	-1.75141	-1.34	0	187.676	-0.668696	0	2.87668	0	-93.699	-261.215	52.8209	2.2227	0.023258	0	0.00627894	1.17376	0	0.972618	0	-0.207269	0	0	0	0	0.0292718	0.789096	10.1113	0	0	0	0	0	0	1	-0.74	-0.39	-1.95	472.18	159.04	5.18	17.25	0
L-Carnosine	Pure water	Pure methanol	gradient elution	1.4	1	-0.0532239	0.15	4.07273	169.76	-0.217252	0.471111	-6.65895	-14.0108	-64	-135.378	-24.5087	-9.90795	0.00368761	0.0268763	-0.0283864	1.01613	1.00508	0.972726	0	0.486737	0	2.7773	0	0	0.017749	0.74402	4.79454	0	0	0	5.69393	0	0	0	-0.97	0.06	-3.29	456.28	227.11	12.99	20.43	0
Betaine	Pure water	Pure methanol	gradient elution	0.88	1	0.772768	1.05	0	0	0.225178	0	0	0	-195.141	0	-361.885	0	-0.00155603	0	-0.418567	0.585225	0	0.97275	0	0.0694444	0	0	0	0	0.0622139	0.469603	0	0	0	0	4.48303	21.143	0	0	-2.41	0.22	-2.88	456.28	118.09	15.35	14.25	0
Cytosine	Pure water	Pure methanol	gradient elution	1.24	1	0.78903	1.25	0	0	0.333051	0	0	0	-59.5266	0	103.863	0	0.025124	0	-0.23766	1.29445	0	0.977719	0	0	0	2.28125	0	0	0.015815	0.795208	4.98398	0	0	0	5.81786	0	0	0	-0.79	-1.16	-2.53	456.28	244.09	12.89	18.33	0
Hypoxanthine	Pure water	Pure methanol	gradient elution	2.2	5.57333	0.02892	0.45	0	184.918	-0.0837538	0	0	0	8	227.824	-171.705	0.962155	0.00358131	0	-0.178483	0.936594	0	0.977857	0	0	0	5.09292	0	0	0.00372035	0.728136	4.79454	0	0	0	11.1639	0	0	0	-0.65	-1.16	-2.04	460.81	269.09	2.51	11.33	0
Xanthine	Pure water	Pure methanol	gradient elution	2.41	6.94533	-0.566757	-0.21	0	185.095	0.0136869	0	0	0	-39.08	-23.5938	51.4977	0.85468	0.0206783	0	-0.142003	1.21659	0	0.977215	0	0	0	7.00843	0	0	0.0130324	0.726429	14.7625	0	0	0	0	0	0	0	-0.57	-1.12	-2.01	462.13	285.08	6.06	22.93	0
Guanine	Pure water	Pure methanol	gradient elution	2.2	5.57333	0.200253	0.53	0	183.104	0.252645	0	6.0434	0	-34.5625	-126.049	-267.038	0.929041	0.017625	0	-0.158414	1.18512	0	0.977827	0	0	0	4.98125	0	0	0.0130324	0.739928	9.77852	0	0	0	11.1639	0	0	0	-1.03	-1.62	-2.51	460.81	284.1	3.28	13.86	0
Uracil	Pure water	Pure methanol	gradient elution	1.49	1	-0.103871	-0.76	0	0	0.20339	0	0	0	-49.0833	0	51.7353	0	0.0294644	0	-0.145434	1.43607	0	0.977161	0	0	0	4.26444	0	0	0.015815	0.746961	9.77852	0	0	0	0	0	0	0	-0.14	-0.31	-1.67	456.28	113.04	6.46	24.76	0
Adenine	Pure water	Pure methanol	gradient elution	4.11	18.052	0.873279	1.46	0	184.918	-0.079507	0	0	0	-9.66667	256.043	-97.6406	0.874208	0.00452556	0	-0.225925	0.799775	0	0.99388	0	0	0	2.82671	0	0	0.00372035	0.726429	0	0	0	0	16.9817	0	0	0	-0.94	-1.32	-1.96	472.13	268.1	11.17	15	0
Cytidine	Pure water	Pure methanol	gradient elution	2	4.26667	-0.562778	-0.02	4.16327	169.415	0.0668159	-2.00556	7.58074	-8.60617	-0.142222	-162.492	114.67	-4.55627	0.00237271	-0.114785	-0.173472	0.958414	0.945774	0.977702	0	-0.452502	0	0	0	0	0.0219589	0.743214	4.5671	0	0	0	0	0	1	0	-1.09	-1.51	-3.17	459.54	112.05	6.86	45.67	0
Inosine	Pure water	Pure methanol	gradient elution	4.17	18.444	-1.30058	-1.89	5.35714	169.805	-0.101128	-2.70968	7.21745	-2.62545	37.0198	105.495	-117.475	2.62073	-0.0026822	-0.123529	-0.15604	0.923862	1.12176	0.977719	0	-0.421262	0	2.38292	0	0	0.0149466	0.729478	9.36164	0	0	0	0	0	1	0	-1.81	-2.31	-2.91	472.46	137.05	9.42	29.87	0
Xanthosine	Pure water	Pure methanol	gradient elution	2.55	7.86	-1.17014	-1.17	5.96667	169.774	0.140549	-3.3125	11.7093	-7.90332	-5.75	-0.995879	79.4792	1.15486	0.00466733	-0.12619	-0.13932	0.981139	1.27513	0.977214	0	-0.47375	0	4.40017	0	0	0.0195069	0.73973	19.3296	0	0	0	0	0	1	0	-1.33	-1.81	-3.1	463	153.04	15.45	32.43	0
Guanosine	Pure water	Pure methanol	gradient elution	4.3	19.2933	-0.81336	-0.81	5.45161	170.413	0.270673	-7.46281	14.5278	-6.16667	0.200184	-141.2	-123.263	0.0426856	0.00370835	-0.257265	-0.134567	0.991755	1.1482	0.977701	0	-0.446918	0	2.29959	0	0	0.390138	0.744966	14.3456	0	0	0	0	0	1	0	-2.13	-2.68	-3.18	473.18	152.06	11.43	36.02	0
Uridine	Pure water	Pure methanol	gradient elution	1.21	1	-1.12641	-0.52	4.39216	169.337	-0.0564181	1.80737	7.79994	-8.20627	-15.0868	-141.765	124.291	-3.09495	0.00479804	0.121445	-0.147671	1.00023	1.1985	0.977214	0	-0.479335	0	2.0005	0	0	0.0219589	0.732168	14.3456	0	0	0	0	0	1	0	0.1	-0.2	-2.3	456.28	245.08	5.57	34.25	0
Adenosine	Pure water	Pure methanol	gradient elution	5.28	25.696	0.0283553	1.04	4.86207	170.386	-0.089798	-3.91895	5.23438	-3.44618	23.1875	108.274	-131.049	1.21257	-0.00231705	-0.159468	-0.169932	0.942973	0.96672	0.987734	0	-0.390397	0	0	0	0	0.0149466	0.723325	4.5671	0	0	0	11.1639	0	1	0	-1.13	-1.84	-1.74	478.38	136.06	2.18	39.95	0
D-Pantothenic acid	0.1% formic acid water	0.1% formic acid methanol	gradient elution	5.34	26.088	-0.913905	-0.57	3.1875	165.167	0.172518	-2.9834	32.1706	-3.39523	-98.1133	112.195	197.571	-4.13803	0.00179049	-0.118086	-0.348219	0.850036	0.967632	0.972576	0.117851	-0.56422	0	0	0	0	0.0403765	0.626558	9.58907	0	5.41499	0	0	0	0	0	-1.17	0.36	-2.31	479.1	220.12	7.46	23.15	0
Niacinamide	0.1% formic acid water	0.1% formic acid methanol	gradient elution	2.18	5.44267	0.403647	0.28	0	176.484	0.12616	0	2.37136	0	-33.3556	-51.3149	111.629	0.917752	0.00515938	0	-0.381849	1.13373	0	0.97302	0	0	0	0	0	0	0.012187	0.73139	9.77852	0	0	0	5.56345	18.3296	0	0	0.24	0.24	-1.34	461.17	123.06	2.95	12.91	0
Pyridoxal	0.1% formic acid water	0.1% formic acid methanol	gradient elution	1.62	1.784	0.559296	0.12	0.25	173.88	-0.0880824	0.979592	-3.84511	3.97298	2.18821	-133.402	-158.857	0.491843	-0.003459	0.521739	-0.147566	0.752946	0	0.957469	0	-0.296713	0.509491	0	0	0	0.0176922	0.78577	9.77852	5.74951	6.92374	5.74951	17.5435	6.92374	0	0	1.19	0.93	-1.68	457.57	168.07	3.53	18.08	0
Biotin	0.1% formic acid water	0.1% formic acid methanol	gradient elution	7.18	38.1093	0.043805	-0.5	1.73457	166.727	-0.0469806	-2.05078	-22.899	-9.19049	-119.098	-237.505	61.8081	-0.0757756	0.00826852	-0.104895	-0.135185	0.866324	1.40842	0.972733	0	3.84562	0	0	0	0	0.0155944	0.604004	4.79454	0	0	0	5.24994	0	2	0	-1.5	-0.95	-1.78	487.99	245.1	8.59	24.78	1
Pyridoxine	0.1% formic acid water	0.1% formic acid methanol	gradient elution	2.2	5.57333	1.00153	0.74	0.16129	177.19	-0.0286503	0.816635	-1.19975	2.91367	17.586	11.4992	-346.724	4.7732	-0.00287479	0.455696	-0.145423	0.711448	0	0.987195	0	-0.512083	0	0	0	0	0.0176922	0.681116	4.98398	5.74951	6.92374	5.74951	16.8208	6.92374	0	0	0.26	0.18	-1.93	461.3	170.08	9.44	32	0
Pyridoxamine	0.1% formic acid water	0.1% formic acid methanol	gradient elution	0.85	1	0.81322	0.47	0.131579	179.43	-0.0324451	0.75	0.310957	2.22454	32.375	21.124	-584.022	7.83375	-0.00221284	0.428571	-0.144951	0.724291	0	0.987195	0	0.0679167	0	0	0	0	0.0176922	0.739481	4.98398	5.74951	6.92374	5.74951	16.8208	6.92374	0	0	0.77	0.53	-2.14	456.78	169.1	2.37	18.04	0
Nicotinic acid	0.1% formic acid water	0.1% formic acid methanol	gradient elution	0.91	1	0.0327479	0.14	0	177.102	0.151025	0	1.71485	0	-13.7755	-76.6296	87.6328	1.3341	0.00526081	0	-0.379721	0.847878	0	0.97302	0	0	0	0	0	0	0.012187	0.741757	4.98398	0	0	0	0	6.06637	0	0	0	0.71	-2.02	456.78	265.11	0	36.27	1
Glycine	0.1% formic acid water	0.1% formic acid methanol	gradient elution	0.79	1	-0.36701	-0.75	0	0	-0.23662	0	0	0	-18	0	67.9816	0	0.00646842	0	0.00697033	1.1298	0	0.972633	0	-0.277778	0	0	0	0	0.0288316	0.879588	4.79454	0	0	0	0	0	0	0	0.42	1.18	-1.56	456.78	76.04	1.77	14.8	0
Alanine	0.1% formic acid water	0.1% formic acid methanol	gradient elution	0.81	1	-0.191786	-0.22	0	0	-0.300229	0	0	0	-26.5917	0	158.987	0	0.00448718	0	-0.145146	0.920777	0	0.972646	0	0	0	0	0	0	0.0452465	0.792124	4.79454	0	0	0	0	0	0	0	0.84	1.54	-1.5	456.78	90.06	1.93	15.51	0
Leucine	0.1% formic acid water	0.1% formic acid methanol	gradient elution	2.62	8.31733	0.287719	0.19	0	182.681	-0.243313	0	3.94249	0	-48.6446	-337.533	-268.032	6.87103	0.00200733	0	-0.212961	0.679665	0	0.972732	0	0.550926	0	0	0	0	0.0419591	0.620628	4.79454	0	5.91791	0	12.3387	0	0	0	1.25	1.96	-1.25	463.9	132.1	1.75	23.12	0
Isoleucine	0.1% formic acid water	0.1% formic acid methanol	gradient elution	2.42	7.01067	0.282884	0.17	0	183.24	-0.209198	0	1.97125	0	6.35537	-58.3046	156.045	5.01987	0.00165898	0	-0.157321	0.656972	0	0.972768	0	0.812963	0	0	0	0	0.0358656	0.620628	4.79454	0	5.91791	0	0	0	0	0	1.36	2.03	-1.22	462.67	132.1	1.86	24.73	0
Valine	0.1% formic acid water	0.1% formic acid methanol	gradient elution	1.26	1	0.213693	0.06	0	184.918	-0.199833	0	0	0	-24.6981	159.61	98.2167	1.90852	0.00210128	0	-0.306527	0.701903	0	0.97275	0	0	0	0	0	0	0.0450994	0.653082	4.79454	0	5.91791	0	0	13.8475	0	0	1.05	2.26	-0.95	456.78	118.09	7.95	13.49	0
Proline	0.1% formic acid water	0.1% formic acid methanol	gradient elution	0.96	1	0.327674	0.3	0	184.918	-0.108799	0	0	0	-17.8858	132.916	-146.36	1.58933	0.00115071	0	-0.0232467	0.687688	0	0.973023	0	2.64213	0	0	0	0	0.0137104	0.674795	4.79454	0	0	0	0	0	1	0	1.15	0.95	-1.39	456.78	116.07	3.61	21.36	0
Phenylalanine	0.1% formic acid water	0.1% formic acid methanol	gradient elution	4.62	21.384	0.15128	0.25	2.9	168.347	-0.271772	1.38374	-12.174	-5.11494	-47.5312	-68.6233	75.7902	-6.16042	0.00160522	0.387302	-0.0559979	0.729389	1.70862	0.972872	0	0.385093	0	0	0	0	0.0179864	0.677269	4.79454	0	0	0	6.42082	0	0	0	0	0.25	-1.21	475.34	166.09	2.66	22.91	0
Methionine	0.1% formic acid water	0.1% formic acid methanol	gradient elution	1.5	1	-0.0417441	-0.03	0.6875	170.668	-0.285717	0.3675	-19.2941	2.07871	-66	-146.383	212.133	-3.99597	0.00183107	0.28655	-0.112273	0.829346	0	0.972807	0	1.36505	0	0	0	0	0.0259416	0.699208	4.79454	0	0	0	6.42082	11.7619	0	0	1.23	2.07	-1.52	456.78	150.06	4.25	22.93	1
Tryptophan	0.1% formic acid water	0.1% formic acid methanol	gradient elution	5.75	28.7667	-0.207542	-0.06	4	167.646	-0.358401	2.4952	-10.8272	-11.9136	-41	131.282	-111.107	-3.61455	0.00129651	0.217584	-0.0621933	0.737639	1.96944	0.97287	0	0.346574	0	3.08396	0	0	0.0155115	0.728807	4.79454	0	0	0	6.42082	0	0	0	-0.77	-0.71	-1.35	481.17	205.1	5.34	22.25	0
Serine	0.1% formic acid water	0.1% formic acid methanol	gradient elution	0.79	1	-0.456438	-0.29	0	184.918	-0.0793225	0	0	0	0	42.2324	150.707	0.184897	0.000371321	0	-0.155377	0.844324	0	0.972823	0	-0.50463	0	0	0	0	0.0333535	0.835752	4.79454	0	0	0	0	0	0	0	0.59	1.41	-1.57	456.78	106.05	3.06	19.55	0
Glutamine	0.1% formic acid water	0.1% formic acid methanol	gradient elution	0.82	1	-0.476842	-0.25	5.82353	183.925	-0.369256	0.32	-23.3139	3.29389	-64.08	59.0726	203.805	3.47946	0.00893018	0.296296	-0.117783	1.0135	0	0.97149	0	0.123148	0	0	0	0	0.0377632	0.737981	9.58907	0	0	0	0	0	0	0	-0.23	0.89	-2.43	456.78	147.08	6.95	22.19	0
Threonine	0.1% formic acid water	0.1% formic acid methanol	gradient elution	0.84	1	-0.289963	-0.22	0	184.918	-0.0112833	0	0	0	-29.827	143.955	132.723	0.966889	0.00134405	0	-0.172276	1.00328	0	0.97275	0	0	0	0	0	0	0.0450994	0.775358	4.79454	0	0	0	0	0	0	0	1	1.69	-1.63	456.78	120.07	4	17.53	0
Cysteine	0.1% formic acid water	0.1% formic acid methanol	gradient elution	0.88	1	-0.601382	-0.51	0	184.918	-0.191786	0	0	0	11.3469	58.4591	145.624	0.439189	0.00259616	0	-0.10926	0.859568	0	0.972823	0	0.189815	0	0	0	0	0.0333535	0.873274	4.79454	0	0	0	0	0	0	0	1.01	1.64	-1.19	456.78	122.03	3.06	20.11	1
Asparagine	0.1% formic acid water	0.1% formic acid methanol	gradient elution	0.8	1	-0.588779	-0.35	0	186.323	-0.360932	0	4.38312	0	-81.7785	-137.418	-17.398	2.35764	0.0116293	0	-0.169425	1.1441	0	0.971481	0	-0.310185	0	0	0	0	0.0419591	0.772083	9.58907	0	0	0	0	0	0	0	-0.51	0.57	-2.46	456.78	133.06	3.88	19.29	0
Glutamic acid	0.1% formic acid water	0.1% formic acid methanol	gradient elution	0.85	1	-0.544059	-0.29	8.64286	181.513	-0.386969	0.177285	-19.313	2.12034	-49.3463	86.6142	198.188	2.45247	0.00983419	0.316832	-0.104615	0.944428	0	0.97149	0	-0.224074	0	0	0	0	0.0377632	0.71972	9.58907	0	0	0	0	0	0	0	-0.05	1.4	-1.87	456.78	148.06	8.05	20.54	1
Lysine	0.1% formic acid water	0.1% formic acid methanol	gradient elution	0.71	1	0.0142927	-0.3	1.43333	176.871	-0.259629	1.22222	3.55556	-13.1944	17.5556	4.08586	74.0145	-2.66724	0.00164722	0.285714	-0.0802053	0.674361	2.15039	0.972806	0	2.76768	0	0	0	0	0.0233474	0.606647	4.79454	0	0	0	12.9656	0	0	0	0.5	2.08	-1.6	456.78	147.11	5.99	18.74	0
Arginine	0.1% formic acid water	0.1% formic acid methanol	gradient elution	0.75	1	0.391962	0.16	2.80556	179.105	-0.208656	-0.739645	11.78	26.3079	-58.3964	91.4679	41.1409	-1.50151	0.0136703	-0.0753466	-0.0466721	0.941005	0.851054	0.972728	0	1.37579	0	0	3.6796	0	0.0314694	0.67178	9.78694	0	0	0	19.3864	0	0	0	-0.44	1.17	-2.22	456.78	175.12	9.11	22.26	0
Histidine	0.1% formic acid water	0.1% formic acid methanol	gradient elution	0.73	1	0.215306	-0.01	4.19048	179.568	-0.27497	0.3025	-5.77778	1.17361	-71.6	-105.157	58.7578	1.89288	0.00298234	0.552511	-0.123024	0.886498	0	0.972873	0	0.287037	0	2.76847	0	0	0.0196215	0.828206	4.79454	0	0	0	0	6.19684	0	0	-0.54	0.28	-1.91	456.78	156.08	5.04	14.6	0
Citrulline	0.1% formic acid water	0.1% formic acid methanol	gradient elution	0.87	1	-0.555583	-0.39	3	178.858	-0.269396	0.16	0.810578	45.5554	-38.472	-21.8523	46.9787	1.06057	0.013287	0.0208333	-0.066654	0.896729	0.980287	0.971489	0	1.19676	0	0	0	0	0.0314694	0.687895	4.79454	0	0	0	19.3864	0	0	0	-0.54	0.87	-2.92	456.78	176.1	7.6	24.14	0
Taurine	0.1% formic acid water	0.1% formic acid methanol	gradient elution	0.81	1	-0.907664	-0.86	0	184.918	0.274994	0	0	0	-63.9388	125.792	-57.6948	0.488671	0.00701129	0	-0.187146	1.21226	0	0.968528	0	-0.383102	0	0	0	0	0.0505076	0.75513	4.55275	0	0	0	0	0	0	0	0.11	1.25	-1.79	456.78	126.02	3.57	10.55	1
Aspartic acid	0.1% formic acid water	0.1% formic acid methanol	gradient elution	0.82	1	-0.539484	-0.44	0	185.095	-0.407537	0	2.88292	0	-69.8906	-117.694	46.8817	1.67049	0.0133137	0	-0.150448	1.083	0	0.971481	0	-0.532407	0	0	0	0	0.0419591	0.75299	9.58907	0	0	0	0	0	0	0	-0.2	0.87	-2.4	456.78	134.05	2.79	21.36	0
Tyrosine	0.1% formic acid water	0.1% formic acid methanol	gradient elution	4.3	19.2933	0.302748	0.14	3.51613	167.88	-0.290316	0.767361	-9.83922	28.5537	-74	-214.017	199.551	-7.94974	0.00320108	0.13194	-0.0847118	0.844114	1.07785	0.972817	0	0.273426	0	0	0	0	0.0247684	0.721847	4.79454	5.74951	0	5.74951	0	12.1327	0	0	-0.58	-0.16	-1.86	473.61	182.08	4.34	23.28	0
Hypotaurine	0.1% formic acid water	0.1% formic acid methanol	gradient elution	0.82	1	-0.661356	-0.48	0	184.918	0.209276	0	0	0	-38.6391	109.154	-29.781	0.569958	0.00335309	0	-0.195251	1.14817	0	0.972911	0	0.46142	0	0	0	0	0.0240263	0.792124	0	0	0	0	0	0	0	0	0.02	0.84	-1.88	456.78	110.03	5.56	19	1
L-Hydroxyproline	0.1% formic acid water	0.1% formic acid methanol	gradient elution	0.83	1	-0.225628	-0.07	0	185.051	-0.400291	0	1.21408	0	-57	-45.8895	-60.5483	2.15365	0.000677485	0	-0.0570443	0.870699	0	0.972959	0	0.728472	0	0	0	0	0.0239818	0.75264	4.79454	0	0	0	12.9656	0	1	0	0.21	0.21	-2.18	456.78	132.07	3.05	18.5	0
Spermidine	0.1% formic acid water	0.1% formic acid methanol	gradient elution	0.62	1	0.308832	0.47	0.465116	172.353	0.0605035	-0.475624	-1.28864	-1.40785	1.46492	-28.0035	28.3531	-2.84336	-0.000981045	-0.0793651	-0.0851324	0.886785	0.985447	0.987144	0	7.08338	0	0	0	0	-8.88e-17	0.439083	0	0	0	0	0	0	0	0	1.49	2.68	-1.89	456.78	146.17	1.9	19.87	0
N-omiga-acetylhistamine	0.1% formic acid water	0.1% formic acid methanol	gradient elution	1.01	1	1.10206	0.79	3.375	170.64	0.141687	0.5	-1.48646	-4.16208	-108.967	321.703	104.971	-0.182039	0.00368699	0.0827068	0.0116427	1.42407	1.03534	0.972968	0	1.46935	0	2.94846	0	0	0.0115018	0.728783	4.79454	0	0	0	6.54476	12.5242	0	0	-0.11	0.61	-2.03	456.78	154.1	4.66	14.64	0
L-pyroglutamic acid	0.1% formic acid water	0.1% formic acid methanol	gradient elution	0.81	1	-0.59598	-0.52	0	185.007	-0.504649	0	0	0	-50.1875	43.7405	-14.2835	1.35384	0.00711642	0	-0.000584856	0.965489	0	0.972787	0	0.768981	0	0	0	0	0.0239818	0.755265	4.79454	0	0	0	12.8416	0	1	0	0.03	0.27	-1.92	456.78	130.05	7.17	21.17	0
Tyramine	0.1% formic acid water	0.1% formic acid methanol	gradient elution	2.73	9.036	0.311807	0	1.04762	173.041	-0.00213992	1.13379	7.05329	-6.54371	-27.737	-62.072	-91.5163	-2.59498	0.00106733	0.515464	-0.0525485	0.941397	4.08884	0.987822	0	1.53279	0	0	0	0	0.00885151	0.687949	0	5.74951	0	5.74951	12.2943	12.1327	0	0	0.76	0.64	-1.3	464.57	138.09	2.6	18.57	0
Histamine	0.1% formic acid water	0.1% formic acid methanol	gradient elution	0.66	1	0.273764	0.69	0	182.607	0.128306	0	0.715302	0	-32.1488	-0.949554	-137.239	2.02706	-3.71e-05	0	-0.119711	0.938476	0	0.987943	0	1.57162	0	2.94694	0	0	-0.00220476	0.757906	0	0	0	0	6.54476	12.5242	0	0	0.15	0.52	-1.69	456.78	112.09	4.89	18.47	0
AaC	0.1% formic acid water	0.1% formic acid methanol	gradient elution	8.33	45.6227	1.00437	0.83	1.96154	162.88	0.146992	3.60681	-1.57745	-1.67113	-31.3875	15.0306	-109.367	-5.02864	0.00641062	0.542045	-0.12069	1.21336	1.00514	0.993852	0	0	0	3.22769	0	0	0.00506264	0.581567	0	0	0	0	5.81786	0	0	0	-0.51	-1.81	-0.59	493.07	184.09	2.51	12.59	0
IQx	0.1% formic acid water	0.1% formic acid methanol	gradient elution	5.76	28.832	1.0246	0.76	1.84375	172.366	0.0162182	3.5625	-5.28337	0.127315	-17.4444	-134.658	-110.419	1.36099	0.00422157	0.446475	-0.0245659	1.15317	0.407619	0.992546	0	0	0	0	0	0	0.00955711	0.704411	9.96796	0	0	0	5.94834	12.3937	0	0	-0.84	-1.44	-1.36	481.22	200.09	8.8	14.84	0
MeAaC	0.1% formic acid water	0.1% formic acid methanol	gradient elution	9.17	51.1107	1.06057	0.95	1.71429	160.865	0.0545901	5.56509	-1.16457	-0.829882	-35	-364.037	150.544	-5.79105	0.00534724	0.422697	-0.281273	1.11919	0.665968	0.992526	0	0	0	3.25491	0	0	0.0106796	0.661372	0	0	6.92374	0	5.81786	0	0	0	-0.5	-1.96	-0.52	496.57	198.1	2.95	12.56	0
8-MeIQx	0.1% formic acid water	0.1% formic acid methanol	gradient elution	6.57	34.124	0.994637	0.77	1.82927	168.51	-0.0121457	7.81893	-1.98217	-7.89712	-41.2442	-384.006	-240.894	-0.460649	0.00429773	0.523993	-0.0419453	1.28946	0.879974	0.992546	0	0	0	0	0	0	0.0155944	0.703025	4.98398	0	6.92374	0	5.94834	6.19684	0	0	-0.94	-1.56	-1.33	485.15	214.11	7.72	15.22	0
MeIQ	0.1% formic acid water	0.1% formic acid methanol	gradient elution	5.76	28.832	1.06743	0.83	1.16981	167.004	0.00823206	4.08163	0.403061	0.413265	-24	-305.586	-929.345	-10.6339	0.005709	0.386473	-0.183861	1.15048	0.417761	0.992544	0	0	0	0	0	0	0.0145421	0.693166	4.98398	0	6.92374	0	5.94834	6.19684	0	0	-0.48	-1.41	-1.02	481.22	213.11	9.17	16.13	0
IQ[4,5-b]	0.1% formic acid water	0.1% formic acid methanol	gradient elution	6.61	34.3853	1.01317	0.78	2.6	160.132	0.102611	6.232	-3.88071	-0.0924444	-22.3744	-282.441	411.565	-12.6158	0.0072498	0.470411	-0.127017	1.09071	0.528921	0.992546	0	0	0	0	0	0	0.0106796	0.667055	0	0	0	0	11.5955	0	0	0	-0.95	-1.6	-1.26	485.34	199.1	10.84	16.69	0
Harman	0.1% formic acid water	0.1% formic acid methanol	gradient elution	7.43	39.7427	1.19107	1.06	1.45161	162.332	-0.147276	3.9375	-1.09274	2.32557	-26	-87.8478	-263.891	-8.21315	-0.000671716	0.931034	0.0601656	1.19402	0	0.993878	0	0	0	3.38375	0	0	0.00386002	0.61804	4.98398	0	6.92374	0	0	0	0	0	0.04	-1.58	-0.53	489.12	183.09	4.55	16.34	0
IQ	0.1% formic acid water	0.1% formic acid methanol	gradient elution	5.4	26.48	1.11742	0.89	1.68571	166.537	-0.00633223	3.1312	-2.95182	-0.471467	-19.1744	-120.622	-181.98	-9.63379	0.00659881	0.393921	-0.123164	1.20767	0.486488	0.992546	0	0	0	0	0	0	0.00955711	0.679819	4.98398	0	0	0	5.94834	6.19684	0	0	-0.41	-1.36	-1.02	479.41	199.1	8.83	15.75	0
Norharman	0.1% formic acid water	0.1% formic acid methanol	gradient elution	6.96	36.672	1.1461	1.02	1.77273	167.047	-0.0911327	0.655329	-0.223923	0.393109	-21.7959	43.0066	-221.607	-3.45951	-0.00147856	1.22458	0.0112688	0.887975	0	1.7516	0	0	0	3.31546	0	0	-0.00271355	0.558507	4.98398	0	0	0	0	0	0	0	-0.06	-1.48	-0.6	486.98	169.08	4.61	16.32	0
DMIP	0.1% formic acid water	0.1% formic acid methanol	gradient elution	5.1	24.52	1.13378	0.94	0.125	163.631	0.11134	2.42975	1.11111	2.66667	-54.0331	-558.981	13.6029	-16.5283	0.00799472	0.590361	-0.333732	1.0747	0	0.992546	0	0	0	0	0	0	0.0193894	0.732239	0	0	6.92374	0	11.5955	6.19684	0	0	-0.73	-0.6	-1.41	477.87	163.1	9.99	17.5	0
Phe-p-1	0.1% formic acid water	0.1% formic acid methanol	gradient elution	7.18	38.1093	1.21185	1.05	2.53846	162.062	-0.0397603	0.964083	-1.98173	-1.03592	-43.1739	-37.7978	172.434	-8.27026	0.00354391	0.152057	-0.0635823	1.05992	1.42371	0.99385	0	0	0	0	0	0	0.00415694	0.499656	0	11.1269	0	0	5.81786	6.19684	0	0	-0.01	-1.31	-0.51	487.99	171.09	3.22	14.9	0
PhIP	0.1% formic acid water	0.1% formic acid methanol	gradient elution	7.86	42.552	0.9372	0.83	3.55814	159.92	0.107045	-1.02021	1	-3	-28.409	-197.079	416.339	-12.8847	0.00574838	-0.0536384	-0.118507	0.957673	1.15047	0.992546	0	0	0	0	0	0	0.00942314	0.623992	0	11.1269	0	0	11.5955	0	0	0	-1.1	-2.09	-1.18	491.03	225.11	10.11	15.87	0
7,8-DiMeIQx	0.1% formic acid water	0.1% formic acid methanol	gradient elution	7.25	38.5667	1.09006	0.86	1.86	165.806	-0.0452133	-2.17	-4.19506	-4.93741	-37	-393.581	48.3821	-8.11469	0.00432243	-0.108122	-0.00311479	1.41426	1.1293	0.992526	0	0	0	0	0	0	0.019931	0.647383	0	0	13.8475	0	5.94834	0	0	0	-1.03	-1.7	-1.3	488.31	228.12	6.62	15.48	0
Sarcosine	0.1% formic acid water	0.1% formic acid methanol	gradient elution	0.81	1	-0.198846	-0.22	0	184.918	-0.0870714	0	0	0	-31.4142	102.506	-139.296	0.647508	0.00144374	0	0.0438904	0.979599	0	0.972911	0	0.0416667	0	0	0	0	0.0240263	0.758664	4.79454	0	0	0	0	7.04767	0	0	1.03	1.7	-1.4	456.78	90.06	2.92	24.65	0
Creatinine	0.1% formic acid water	0.1% formic acid methanol	gradient elution	0.89	1	0.89939	0.27	0	0	0.152068	0	0	0	-90	0	354.201	0	0.0113129	0	-0.314768	1.21391	0	0.977938	0	0.325231	0	0	3.45139	1.59954	0.0269795	0.733849	4.79454	0	0	0	12.5043	11.9476	1	0	-0.85	-0.34	-2.16	456.78	114.07	11.98	15.98	0
L-Dihydroorotic acid	0.1% formic acid water	0.1% formic acid methanol	gradient elution	1.01	1	-1.73112	-1.33	0	187.676	-0.668696	0	2.87668	0	-93.699	-261.215	52.8209	2.2227	0.023258	0	0.00627894	1.17376	0	0.972618	0	-0.207269	0	0	0	0	0.0292718	0.789096	10.1113	0	0	0	0	0	0	1	-0.28	-0.17	-2.23	456.78	159.04	5.18	17.25	0
L-Carnosine	0.1% formic acid water	0.1% formic acid methanol	gradient elution	0.75	1	-0.0539286	-0.78	4.07273	169.76	-0.217252	0.471111	-6.65895	-14.0108	-64	-135.378	-24.5087	-9.90795	0.00368761	0.0268763	-0.0283864	1.01613	1.00508	0.972726	0	0.486737	0	2.7773	0	0	0.017749	0.74402	4.79454	0	0	0	5.69393	0	0	0	-0.98	0.05	-3.29	456.78	227.11	12.99	20.43	0
Uric acid	0.1% formic acid water	0.1% formic acid methanol	gradient elution	1.88	3.48267	-0.395085	-0.91	9	185.184	0.250054	0	0	0	-88.5	16.056	25.4208	1.01156	0.0348402	0	-0.116719	1.36475	0	0.976844	0	0	0	8.70546	0	0	0.0207925	0.586893	24.7305	0	0	0	0	0	0	0	-0.98	-1.76	-2.7	459.26	169.04	4.89	20.01	0
Betaine	0.1% formic acid water	0.1% formic acid methanol	gradient elution	0.87	1	0.772153	0.38	0	0	0.225178	0	0	0	-195.141	0	-361.885	0	-0.00155603	0	-0.418567	0.585225	0	0.97275	0	0.0694444	0	0	0	0	0.0622139	0.469603	0	0	0	0	4.48303	21.143	0	0	-2.41	0.21	-2.88	456.78	118.09	15.35	14.25	0
Cytosine	0.1% formic acid water	0.1% formic acid methanol	gradient elution	0.9	1	0.78903	0.25	0	0	0.333051	0	0	0	-59.5266	0	103.863	0	0.025124	0	-0.23766	1.29445	0	0.977719	0	0	0	2.28125	0	0	0.015815	0.795208	4.98398	0	0	0	5.81786	0	0	0	-0.79	-1.16	-2.53	456.78	244.09	12.89	18.33	0
Hypoxanthine	0.1% formic acid water	0.1% formic acid methanol	gradient elution	2.08	4.78933	0.0288908	-0.06	0	184.918	-0.0837538	0	0	0	8	227.824	-171.705	0.962155	0.00358131	0	-0.178483	0.936594	0	0.977857	0	0	0	5.09292	0	0	0.00372035	0.728136	4.79454	0	0	0	11.1639	0	0	0	-0.64	-1.16	-2.06	460.54	269.09	2.51	11.33	0
Xanthine	0.1% formic acid water	0.1% formic acid methanol	gradient elution	2.5	7.53333	-0.566511	-0.37	0	185.095	0.0136869	0	0	0	-39.08	-23.5938	51.4977	0.85468	0.0206783	0	-0.142003	1.21659	0	0.977215	0	0	0	7.00843	0	0	0.0130324	0.726429	14.7625	0	0	0	0	0	0	0	-0.59	-1.12	-2	463.17	285.08	6.06	22.93	0
Guanine	0.1% formic acid water	0.1% formic acid methanol	gradient elution	1.52	1.13067	0.209605	0.06	0	183.104	0.252645	0	6.0434	0	-34.5625	-126.049	-267.038	0.929041	0.017625	0	-0.158414	1.18512	0	0.977827	0	0	0	4.98125	0	0	0.0130324	0.739928	9.77852	0	0	0	11.1639	0	0	0	-0.96	-1.63	-2.61	456.91	284.1	3.28	13.86	0
Uracil	0.1% formic acid water	0.1% formic acid methanol	gradient elution	1.49	1	-0.103871	-0.62	0	0	0.20339	0	0	0	-49.0833	0	51.7353	0	0.0294644	0	-0.145434	1.43607	0	0.977161	0	0	0	4.26444	0	0	0.015815	0.746961	9.77852	0	0	0	0	0	0	0	-0.14	-0.31	-1.67	456.78	113.04	6.46	24.76	0
Adenine	0.1% formic acid water	0.1% formic acid methanol	gradient elution	1.45	1	0.85058	0.52	0	184.918	-0.079507	0	0	0	-9.66667	256.043	-97.6406	0.874208	0.00452556	0	-0.225925	0.799775	0	0.99388	0	0	0	2.82671	0	0	0.00372035	0.726429	0	0	0	0	16.9817	0	0	0	-0.75	-1.26	-2.24	456.78	268.1	11.17	15	0
Beta-Thymidine	0.1% formic acid water	0.1% formic acid methanol	gradient elution	4.95	23.54	-1.58824	-1.71	3.76786	167.29	0.287893	2.82726	-4.76015	-3.13025	-46.2508	-217.644	116.213	0.246177	0.00686201	0.128257	-0.297668	1.07617	1.14028	0.977251	0	-0.105784	0	2.15934	0	0	0.0229493	0.706637	14.3456	0	6.92374	0	5.56345	6.92374	1	0	-0.98	-1.1	-1.84	477.09	243.1	4.01	45.1	0
Cytidine	0.1% formic acid water	0.1% formic acid methanol	gradient elution	1.06	1	-0.564768	-0.7	4.16327	169.415	0.0668159	-2.00556	7.58074	-8.60617	-0.142222	-162.492	114.67	-4.55627	0.00237271	-0.114785	-0.173472	0.958414	0.945774	0.977702	0	-0.452502	0	0	0	0	0.0219589	0.743214	4.5671	0	0	0	0	0	1	0	-0.86	-1.38	-3.27	456.78	112.05	6.86	45.67	0
Inosine	0.1% formic acid water	0.1% formic acid methanol	gradient elution	4.18	18.5093	-1.30058	-1.24	5.35714	169.805	-0.101128	-2.70968	7.21745	-2.62545	37.0198	105.495	-117.475	2.62073	-0.0026822	-0.123529	-0.15604	0.923862	1.12176	0.977719	0	-0.421262	0	2.38292	0	0	0.0149466	0.729478	9.36164	0	0	0	0	0	1	0	-1.81	-2.31	-2.91	472.95	137.05	9.42	29.87	0
Xanthosine	0.1% formic acid water	0.1% formic acid methanol	gradient elution	4.65	21.58	-1.11799	-1.15	5.96667	169.774	0.140549	-3.3125	11.7093	-7.90332	-5.75	-0.995879	79.4792	1.15486	0.00466733	-0.12619	-0.13932	0.981139	1.27513	0.977214	0	-0.47375	0	4.40017	0	0	0.0195069	0.73973	19.3296	0	0	0	0	0	1	0	-1.76	-2.15	-2.78	475.5	153.04	15.45	32.43	0
Guanosine	0.1% formic acid water	0.1% formic acid methanol	gradient elution	4.21	18.7053	-0.81336	-0.56	5.45161	170.413	0.270673	-7.46281	14.5278	-6.16667	0.200184	-141.2	-123.263	0.0426856	0.00370835	-0.257265	-0.134567	0.991755	1.1482	0.977701	0	-0.446918	0	2.29959	0	0	0.390138	0.744966	14.3456	0	0	0	0	0	1	0	-2.13	-2.67	-3.19	473.12	152.06	11.43	36.02	0
Adenosine	0.1% formic acid water	0.1% formic acid methanol	gradient elution	4.23	18.836	0.0424367	0.13	4.86207	170.386	-0.089798	-3.91895	5.23438	-3.44618	23.1875	108.274	-131.049	1.21257	-0.00231705	-0.159468	-0.169932	0.942973	0.96672	0.987734	0	-0.390397	0	0	0	0	0.0149466	0.723325	4.5671	0	0	0	11.1639	0	1	0	-0.92	-1.6	-1.84	473.23	136.06	2.18	39.95	0

## Sheet: ANN-MC
Compounds	Mobile phase A	Mobile phase B	Elution conditions	Peak time	B%	predicted_values	true_values	AATS6dv	AATS6i	ATSC4c	ATSC8d	ATSC7s	ATSC8s	ATSC3Z	ATSC6m	ATSC5v	ATSC6i	AATSC2c	MATS8d	MATS3i	GATS3se	GATS8se	BCUTd-1l	Xc-6d	SssCH2	SdsCH	SaaNH	SdsN	SsssN	AETA_eta_B	BIC1	PEOE_VSA2	SMR_VSA9	SlogP_VSA4	SlogP_VSA11	EState_VSA3	EState_VSA6	n5AHRing	n6AHRing	ln(gamma)	Total mean interaction energy in the mix (H_int)	H-Bond interaction energy in the mix (H_HB)	Solvent_density	M+1	Dipole moment t_value	PKA(25,MeCN)	Sulfur Count
D-Pantothenic acid	Pure water	Pure methanol	gradient elution	1.7	2.30667	-0.84478	-0.9	3.1875	165.167	0.172518	-2.9834	32.1706	-3.39523	-98.1133	112.195	197.571	-4.13803	0.00179049	-0.118086	-0.348219	0.850036	0.967632	0.972576	0.117851	-0.56422	0	0	0	0	0.0403765	0.626558	9.58907	0	5.41499	0	0	0	0	0	0.19	1.49	-2.76	457.6	220.12	7.46	23.15	0
Niacinamide	Pure water	Pure methanol	gradient elution	4.21	18.7053	0.413199	0.76	0	176.484	0.12616	0	2.37136	0	-33.3556	-51.3149	111.629	0.917752	0.00515938	0	-0.381849	1.13373	0	0.97302	0	0	0	0	0	0	0.012187	0.73139	9.77852	0	0	0	5.56345	18.3296	0	0	-0.2	-0.07	-1.19	472.68	123.06	2.95	12.91	0
Pyridoxal	Pure water	Pure methanol	gradient elution	3.4	13.4133	0.586703	1.03	0.25	173.88	-0.0880824	0.979592	-3.84511	3.97298	2.18821	-133.402	-158.857	0.491843	-0.003459	0.521739	-0.147566	0.752946	0	0.957469	0	-0.296713	0.509491	0	0	0	0.0176922	0.78577	9.77852	5.74951	6.92374	5.74951	17.5435	6.92374	0	0	0.32	0.24	-1.52	468.09	168.07	3.53	18.08	0
Biotin	Pure water	Pure methanol	gradient elution	5.13	24.716	-0.128284	-1.01	1.73457	166.727	-0.0469806	-2.05078	-22.899	-9.19049	-119.098	-237.505	61.8081	-0.0757756	0.00826852	-0.104895	-0.135185	0.866324	1.40842	0.972733	0	3.84562	0	0	0	0	0.0155944	0.604004	4.79454	0	0	0	5.24994	0	2	0	-1.32	-0.66	-1.95	477.61	245.1	8.59	24.78	1
Pyridoxine	Pure water	Pure methanol	gradient elution	4.51	20.6653	1.11877	1.55	0.16129	177.19	-0.0286503	0.816635	-1.19975	2.91367	17.586	11.4992	-346.724	4.7732	-0.00287479	0.455696	-0.145423	0.711448	0	0.987195	0	-0.512083	0	0	0	0	0.0176922	0.681116	4.98398	5.74951	6.92374	5.74951	16.8208	6.92374	0	0	-0.46	-0.41	-1.73	474.32	170.08	9.44	32	0
Pyridoxamine	Pure water	Pure methanol	gradient elution	4.7	21.9067	0.936763	1.31	0.131579	179.43	-0.0324451	0.75	0.310957	2.22454	32.375	21.124	-584.022	7.83375	-0.00221284	0.428571	-0.144951	0.724291	0	0.987195	0	0.0679167	0	0	0	0	0.0176922	0.739481	4.98398	5.74951	6.92374	5.74951	16.8208	6.92374	0	0	-0.41	-0.4	-1.81	475.34	169.1	2.37	18.04	0
Nicotinic acid	Pure water	Pure methanol	gradient elution	0.98	1	0.436989	0.68	0	177.102	0.151025	0	1.71485	0	-13.7755	-76.6296	87.6328	1.3341	0.00526081	0	-0.379721	0.847878	0	0.97302	0	0	0	0	0	0	0.012187	0.741757	4.98398	0	0	0	0	6.06637	0	0	1.42	0.98	-1.28	456.28	124.04	0.88	20.67	0
Glycine	Pure water	Pure methanol	gradient elution	0.8	1	-0.201655	-0.68	0	0	-0.23662	0	0	0	-18	0	67.9816	0	0.00646842	0	0.00697033	1.1298	0	0.972633	0	-0.277778	0	0	0	0	0.0288316	0.879588	4.79454	0	0	0	0	0	0	0	0.42	1.18	-1.56	456.28	76.04	1.77	14.8	0
Alanine	Pure water	Pure methanol	gradient elution	0.82	1	-0.0305393	0.12	0	0	-0.300229	0	0	0	-26.5917	0	158.987	0	0.00448718	0	-0.145146	0.920777	0	0.972646	0	0	0	0	0	0	0.0452465	0.792124	4.79454	0	0	0	0	0	0	0	0.84	1.55	-1.5	456.28	90.06	1.93	15.51	0
Leucine	Pure water	Pure methanol	gradient elution	2.04	4.528	0.430824	0.61	0	182.681	-0.243313	0	3.94249	0	-48.6446	-337.533	-268.032	6.87103	0.00200733	0	-0.212961	0.679665	0	0.972732	0	0.550926	0	0	0	0	0.0419591	0.620628	4.79454	0	5.91791	0	12.3387	0	0	0	1.58	2.22	-1.29	459.8	132.1	1.75	23.12	0
Isoleucine	Pure water	Pure methanol	gradient elution	1.89	3.548	0.409549	0.5	0	183.24	-0.209198	0	1.97125	0	6.35537	-58.3046	156.045	5.01987	0.00165898	0	-0.157321	0.656972	0	0.972768	0	0.812963	0	0	0	0	0.0358656	0.620628	4.79454	0	5.91791	0	0	0	0	0	1.68	2.28	-1.26	458.83	132.1	1.86	24.73	0
Valine	Pure water	Pure methanol	gradient elution	1.04	1	0.340226	0.43	0	184.918	-0.199833	0	0	0	-24.6981	159.61	98.2167	1.90852	0.00210128	0	-0.306527	0.701903	0	0.97275	0	0	0	0	0	0	0.0450994	0.653082	4.79454	0	5.91791	0	0	13.8475	0	0	1.05	2.27	-0.96	456.28	118.09	7.95	13.49	0
Proline	Pure water	Pure methanol	gradient elution	0.96	1	0.34547	0.62	0	184.918	-0.108799	0	0	0	-17.8858	132.916	-146.36	1.58933	0.00115071	0	-0.0232467	0.687688	0	0.973023	0	2.64213	0	0	0	0	0.0137104	0.674795	4.79454	0	0	0	0	0	1	0	1.16	0.95	-1.39	456.28	116.07	3.61	21.36	0
Phenylalanine	Pure water	Pure methanol	gradient elution	4.4	19.9467	0.208896	0.34	2.9	168.347	-0.271772	1.38374	-12.174	-5.11494	-47.5312	-68.6233	75.7902	-6.16042	0.00160522	0.387302	-0.0559979	0.729389	1.70862	0.972872	0	0.385093	0	0	0	0	0.0179864	0.677269	4.79454	0	0	0	6.42082	0	0	0	0.05	0.3	-1.22	473.72	166.09	2.66	22.91	0
Methionine	Pure water	Pure methanol	gradient elution	1.4	1	0.165566	0.24	0.6875	170.668	-0.285717	0.3675	-19.2941	2.07871	-66	-146.383	212.133	-3.99597	0.00183107	0.28655	-0.112273	0.829346	0	0.972807	0	1.36505	0	0	0	0	0.0259416	0.699208	4.79454	0	0	0	6.42082	11.7619	0	0	1.24	2.08	-1.52	456.28	150.06	4.25	22.93	1
Tryptophan	Pure water	Pure methanol	gradient elution	5.36	26.2187	-0.100371	-0.08	4	167.646	-0.358401	2.4952	-10.8272	-11.9136	-41	131.282	-111.107	-3.61455	0.00129651	0.217584	-0.0621933	0.737639	1.96944	0.97287	0	0.346574	0	3.08396	0	0	0.0155115	0.728807	4.79454	0	0	0	6.42082	0	0	0	-0.71	-0.62	-1.37	478.79	205.1	5.34	22.25	0
Serine	Pure water	Pure methanol	gradient elution	0.8	1	-0.31689	-0.42	0	184.918	-0.0793225	0	0	0	0	42.2324	150.707	0.184897	0.000371321	0	-0.155377	0.844324	0	0.972823	0	-0.50463	0	0	0	0	0.0333535	0.835752	4.79454	0	0	0	0	0	0	0	0.59	1.41	-1.57	456.28	106.05	3.06	19.55	0
Glutamine	Pure water	Pure methanol	gradient elution	0.83	1	-0.342488	-0.02	5.82353	183.925	-0.369256	0.32	-23.3139	3.29389	-64.08	59.0726	203.805	3.47946	0.00893018	0.296296	-0.117783	1.0135	0	0.97149	0	0.123148	0	0	0	0	0.0377632	0.737981	9.58907	0	0	0	0	0	0	0	-0.22	0.89	-2.44	456.28	147.08	6.95	22.19	0
Threonine	Pure water	Pure methanol	gradient elution	0.83	1	-0.174741	-0.19	0	184.918	-0.0112833	0	0	0	-29.827	143.955	132.723	0.966889	0.00134405	0	-0.172276	1.00328	0	0.97275	0	0	0	0	0	0	0.0450994	0.775358	4.79454	0	0	0	0	0	0	0	1	1.7	-1.63	456.28	120.07	4	17.53	0
Cysteine	Pure water	Pure methanol	gradient elution	0.87	1	-0.49951	-1.13	0	184.918	-0.191786	0	0	0	11.3469	58.4591	145.624	0.439189	0.00259616	0	-0.10926	0.859568	0	0.972823	0	0.189815	0	0	0	0	0.0333535	0.873274	4.79454	0	0	0	0	0	0	0	1.02	1.64	-1.19	456.28	122.03	3.06	20.11	1
Asparagine	Pure water	Pure methanol	gradient elution	0.81	1	-0.462217	-0.64	0	186.323	-0.360932	0	4.38312	0	-81.7785	-137.418	-17.398	2.35764	0.0116293	0	-0.169425	1.1441	0	0.971481	0	-0.310185	0	0	0	0	0.0419591	0.772083	9.58907	0	0	0	0	0	0	0	-0.51	0.57	-2.46	456.28	133.06	3.88	19.29	0
Glutamic acid	Pure water	Pure methanol	gradient elution	0.6	1	-0.3625	-0.76	8.64286	181.513	-0.386969	0.177285	-19.313	2.12034	-49.3463	86.6142	198.188	2.45247	0.00983419	0.316832	-0.104615	0.944428	0	0.97149	0	-0.224074	0	0	0	0	0.0377632	0.71972	9.58907	0	0	0	0	0	0	0	-0.05	1.4	-1.87	456.28	148.06	8.05	20.54	1
Lysine	Pure water	Pure methanol	gradient elution	1.4	1	0.1605	0.34	1.43333	176.871	-0.259629	1.22222	3.55556	-13.1944	17.5556	4.08586	74.0145	-2.66724	0.00164722	0.285714	-0.0802053	0.674361	2.15039	0.972806	0	2.76768	0	0	0	0	0.0233474	0.606647	4.79454	0	0	0	12.9656	0	0	0	0.51	2.08	-1.6	456.28	147.11	5.99	18.74	0
Arginine	Pure water	Pure methanol	gradient elution	1.5	1	0.324303	1.31	2.80556	179.105	-0.208656	-0.739645	11.78	26.3079	-58.3964	91.4679	41.1409	-1.50151	0.0136703	-0.0753466	-0.0466721	0.941005	0.851054	0.972728	0	1.37579	0	0	3.6796	0	0.0314694	0.67178	9.78694	0	0	0	19.3864	0	0	0	-0.43	1.17	-2.23	456.28	175.12	9.11	22.26	0
Histidine	Pure water	Pure methanol	gradient elution	1.35	1	0.101271	1.03	4.19048	179.568	-0.27497	0.3025	-5.77778	1.17361	-71.6	-105.157	58.7578	1.89288	0.00298234	0.552511	-0.123024	0.886498	0	0.972873	0	0.287037	0	2.76847	0	0	0.0196215	0.828206	4.79454	0	0	0	0	6.19684	0	0	-0.54	0.29	-1.91	456.28	156.08	5.04	14.6	0
Citrulline	Pure water	Pure methanol	gradient elution	0.87	1	-0.379186	-0.27	3	178.858	-0.269396	0.16	0.810578	45.5554	-38.472	-21.8523	46.9787	1.06057	0.013287	0.0208333	-0.066654	0.896729	0.980287	0.971489	0	1.19676	0	0	0	0	0.0314694	0.687895	4.79454	0	0	0	19.3864	0	0	0	-0.54	0.87	-2.92	456.28	176.1	7.6	24.14	0
Taurine	Pure water	Pure methanol	gradient elution	0.8	1	-0.852615	-1.43	0	184.918	0.274994	0	0	0	-63.9388	125.792	-57.6948	0.488671	0.00701129	0	-0.187146	1.21226	0	0.968528	0	-0.383102	0	0	0	0	0.0505076	0.75513	4.55275	0	0	0	0	0	0	0	0.11	1.25	-1.79	456.28	126.02	3.57	10.55	1
Aspartic acid	Pure water	Pure methanol	gradient elution	0.6	1	-0.488361	-1.3	0	185.095	-0.407537	0	2.88292	0	-69.8906	-117.694	46.8817	1.67049	0.0133137	0	-0.150448	1.083	0	0.971481	0	-0.532407	0	0	0	0	0.0419591	0.75299	9.58907	0	0	0	0	0	0	0	-0.2	0.87	-2.4	456.28	134.05	2.79	21.36	0
Tyrosine	Pure water	Pure methanol	gradient elution	5.2	25.1733	0.406831	0.83	3.51613	167.88	-0.290316	0.767361	-9.83922	28.5537	-74	-214.017	199.551	-7.94974	0.00320108	0.13194	-0.0847118	0.844114	1.07785	0.972817	0	0.273426	0	0	0	0	0.0247684	0.721847	4.79454	5.74951	0	5.74951	0	12.1327	0	0	-0.75	-0.33	-1.8	477.97	182.08	4.34	23.28	0
Hypotaurine	Pure water	Pure methanol	gradient elution	0.82	1	-0.600769	-0.93	0	184.918	0.209276	0	0	0	-38.6391	109.154	-29.781	0.569958	0.00335309	0	-0.195251	1.14817	0	0.972911	0	0.46142	0	0	0	0	0.0240263	0.792124	0	0	0	0	0	0	0	0	0.03	0.84	-1.88	456.28	110.03	5.56	19	1
L-Hydroxyproline	Pure water	Pure methanol	gradient elution	0.84	1	-0.0782749	0.02	0	185.051	-0.400291	0	1.21408	0	-57	-45.8895	-60.5483	2.15365	0.000677485	0	-0.0570443	0.870699	0	0.972959	0	0.728472	0	0	0	0	0.0239818	0.75264	4.79454	0	0	0	12.9656	0	1	0	0.21	0.21	-2.18	456.28	132.07	3.05	18.5	0
N-omiga-acetylhistamine	Pure water	Pure methanol	gradient elution	4.6	21.2533	1.24416	1.64	3.375	170.64	0.141687	0.5	-1.48646	-4.16208	-108.967	321.703	104.971	-0.182039	0.00368699	0.0827068	0.0116427	1.42407	1.03534	0.972968	0	1.46935	0	2.94846	0	0	0.0115018	0.728783	4.79454	0	0	0	6.54476	12.5242	0	0	-0.89	0.05	-1.73	474.8	154.1	4.66	14.64	0
L-pyroglutamic acid	Pure water	Pure methanol	gradient elution	0.83	1	-0.448334	-0.34	0	185.007	-0.504649	0	0	0	-50.1875	43.7405	-14.2835	1.35384	0.00711642	0	-0.000584856	0.965489	0	0.972787	0	0.768981	0	0	0	0	0.0239818	0.755265	4.79454	0	0	0	12.8416	0	1	0	0.04	0.28	-1.92	456.28	130.05	7.17	21.17	0
Histamine	Pure water	Pure methanol	gradient elution	4.6	21.2533	0.451244	-0.03	0	182.607	0.128306	0	0.715302	0	-32.1488	-0.949554	-137.239	2.02706	-3.71e-05	0	-0.119711	0.938476	0	0.987943	0	1.57162	0	2.94694	0	0	-0.00220476	0.757906	0	0	0	0	6.54476	12.5242	0	0	-0.53	0.05	-1.46	474.8	112.09	4.89	18.47	0
AaC	Pure water	Pure methanol	gradient elution	10	56.5333	0.858976	1.51	1.96154	162.88	0.146992	3.60681	-1.57745	-1.67113	-31.3875	15.0306	-109.367	-5.02864	0.00641062	0.542045	-0.12069	1.21336	1.00514	0.993852	0	0	0	3.22769	0	0	0.00506264	0.581567	0	0	0	0	5.81786	0	0	0	-0.63	-2.05	-0.55	499.53	184.09	2.51	12.59	0
IQx	Pure water	Pure methanol	gradient elution	7.35	39.22	0.964828	1.68	1.84375	172.366	0.0162182	3.5625	-5.28337	0.127315	-17.4444	-134.658	-110.419	1.36099	0.00422157	0.446475	-0.0245659	1.15317	0.407619	0.992546	0	0	0	0	0	0	0.00955711	0.704411	9.96796	0	0	0	5.94834	12.3937	0	0	-0.94	-1.63	-1.26	488.38	200.09	8.8	14.84	0
MeAaC	Pure water	Pure methanol	gradient elution	10.95	62.74	0.719914	1.49	1.71429	160.865	0.0545901	5.56509	-1.16457	-0.829882	-35	-364.037	150.544	-5.79105	0.00534724	0.422697	-0.281273	1.11919	0.665968	0.992526	0	0	0	3.25491	0	0	0.0106796	0.661372	0	0	6.92374	0	5.81786	0	0	0	-0.63	-2.23	-0.49	503.13	198.1	2.95	12.56	0
8-MeIQx	Pure water	Pure methanol	gradient elution	8.27	45.2307	1.05495	1.68	1.82927	168.51	-0.0121457	7.81893	-1.98217	-7.89712	-41.2442	-384.006	-240.894	-0.460649	0.00429773	0.523993	-0.0419453	1.28946	0.879974	0.992546	0	0	0	0	0	0	0.0155944	0.703025	4.98398	0	6.92374	0	5.94834	6.19684	0	0	-1.05	-1.78	-1.23	492.45	214.11	7.72	15.22	0
MeIQ	Pure water	Pure methanol	gradient elution	8.77	48.4973	1.1204	1.65	1.16981	167.004	0.00823206	4.08163	0.403061	0.413265	-24	-305.586	-929.345	-10.6339	0.005709	0.386473	-0.183861	1.15048	0.417761	0.992544	0	0	0	0	0	0	0.0145421	0.693166	4.98398	0	6.92374	0	5.94834	6.19684	0	0	-0.82	-1.94	-0.88	494.56	213.11	9.17	16.13	0
IQ[4,5-b]	Pure water	Pure methanol	gradient elution	8.9	49.3467	1.04811	1.67	2.6	160.132	0.102611	6.232	-3.88071	-0.0924444	-22.3744	-282.441	411.565	-12.6158	0.0072498	0.470411	-0.127017	1.09071	0.528921	0.992546	0	0	0	0	0	0	0.0106796	0.667055	0	0	0	0	11.5955	0	0	0	-1.04	-1.85	-1.15	495.11	199.1	10.84	16.69	0
Harman	Pure water	Pure methanol	gradient elution	10.5	59.8	1.37088	2.02	1.45161	162.332	-0.147276	3.9375	-1.09274	2.32557	-26	-87.8478	-263.891	-8.21315	-0.000671716	0.931034	0.0601656	1.19402	0	0.993878	0	0	0	3.38375	0	0	0.00386002	0.61804	4.98398	0	6.92374	0	0	0	0	0	-0.28	-2.12	-0.47	501.45	183.09	4.55	16.34	0
IQ	Pure water	Pure methanol	gradient elution	8.09	44.0547	1.25415	1.64	1.68571	166.537	-0.00633223	3.1312	-2.95182	-0.471467	-19.1744	-120.622	-181.98	-9.63379	0.00659881	0.393921	-0.123164	1.20767	0.486488	0.992546	0	0	0	0	0	0	0.00955711	0.679819	4.98398	0	0	0	5.94834	6.19684	0	0	-0.72	-1.82	-0.89	491.67	199.1	8.83	15.75	0
Norharman	Pure water	Pure methanol	gradient elution	10.33	58.6893	1.22947	1.98	1.77273	167.047	-0.0911327	0.655329	-0.223923	0.393109	-21.7959	43.0066	-221.607	-3.45951	-0.00147856	1.22458	0.0112688	0.887975	0	1.7516	0	0	0	3.31546	0	0	-0.00271355	0.558507	4.98398	0	0	0	0	0	0	0	-0.36	-1.99	-0.53	500.8	169.08	4.61	16.32	0
DMIP	Pure water	Pure methanol	gradient elution	7.33	39.0893	1.23528	1.84	0.125	163.631	0.11134	2.42975	1.11111	2.66667	-54.0331	-558.981	13.6029	-16.5283	0.00799472	0.590361	-0.333732	1.0747	0	0.992546	0	0	0	0	0	0	0.0193894	0.732239	0	0	6.92374	0	11.5955	6.19684	0	0	-0.89	-0.84	-1.28	488.29	163.1	9.99	17.5	0
Phe-p-1	Pure water	Pure methanol	gradient elution	10.16	57.5787	1.2857	2.02	2.53846	162.062	-0.0397603	0.964083	-1.98173	-1.03592	-43.1739	-37.7978	172.434	-8.27026	0.00354391	0.152057	-0.0635823	1.05992	1.42371	0.99385	0	0	0	0	0	0	0.00415694	0.499656	0	11.1269	0	0	5.81786	6.19684	0	0	-0.31	-1.81	-0.45	500.15	171.09	3.22	14.9	0
PhIP	Pure water	Pure methanol	gradient elution	10.02	56.664	1.02368	1.68	3.55814	159.92	0.107045	-1.02021	1	-3	-28.409	-197.079	416.339	-12.8847	0.00574838	-0.0536384	-0.118507	0.957673	1.15047	0.992546	0	0	0	0	0	0	0.00942314	0.623992	0	11.1269	0	0	11.5955	0	0	0	-1.18	-2.35	-1.09	499.6	225.11	10.11	15.87	0
7,8-DiMeIQx	Pure water	Pure methanol	gradient elution	9	50	1.07224	1.75	1.86	165.806	-0.0452133	-2.17	-4.19506	-4.93741	-37	-393.581	48.3821	-8.11469	0.00432243	-0.108122	-0.00311479	1.41426	1.1293	0.992526	0	0	0	0	0	0	0.019931	0.647383	0	0	13.8475	0	5.94834	0	0	0	-1.14	-1.95	-1.21	495.52	228.12	6.62	15.48	0
Sarcosine	Pure water	Pure methanol	gradient elution	0.82	1	-0.0962131	0.12	0	184.918	-0.0870714	0	0	0	-31.4142	102.506	-139.296	0.647508	0.00144374	0	0.0438904	0.979599	0	0.972911	0	0.0416667	0	0	0	0	0.0240263	0.758664	4.79454	0	0	0	0	7.04767	0	0	1.04	1.7	-1.4	456.28	90.06	2.92	24.65	0
Creatinine	Pure water	Pure methanol	gradient elution	1.4	1	0.773615	1.38	0	0	0.152068	0	0	0	-90	0	354.201	0	0.0113129	0	-0.314768	1.21391	0	0.977938	0	0.325231	0	0	3.45139	1.59954	0.0269795	0.733849	4.79454	0	0	0	12.5043	11.9476	1	0	-0.84	-0.34	-2.16	456.28	114.07	11.98	15.98	0
L-Dihydroorotic acid	Pure water	Pure methanol	gradient elution	4.12	18.1173	-1.38928	-1.34	0	187.676	-0.668696	0	2.87668	0	-93.699	-261.215	52.8209	2.2227	0.023258	0	0.00627894	1.17376	0	0.972618	0	-0.207269	0	0	0	0	0.0292718	0.789096	10.1113	0	0	0	0	0	0	1	-0.74	-0.39	-1.95	472.18	159.04	5.18	17.25	0
L-Carnosine	Pure water	Pure methanol	gradient elution	1.4	1	-0.0454155	0.15	4.07273	169.76	-0.217252	0.471111	-6.65895	-14.0108	-64	-135.378	-24.5087	-9.90795	0.00368761	0.0268763	-0.0283864	1.01613	1.00508	0.972726	0	0.486737	0	2.7773	0	0	0.017749	0.74402	4.79454	0	0	0	5.69393	0	0	0	-0.97	0.06	-3.29	456.28	227.11	12.99	20.43	0
Betaine	Pure water	Pure methanol	gradient elution	0.88	1	0.622558	1.05	0	0	0.225178	0	0	0	-195.141	0	-361.885	0	-0.00155603	0	-0.418567	0.585225	0	0.97275	0	0.0694444	0	0	0	0	0.0622139	0.469603	0	0	0	0	4.48303	21.143	0	0	-2.41	0.22	-2.88	456.28	118.09	15.35	14.25	0
Cytosine	Pure water	Pure methanol	gradient elution	1.24	1	0.878341	1.25	0	0	0.333051	0	0	0	-59.5266	0	103.863	0	0.025124	0	-0.23766	1.29445	0	0.977719	0	0	0	2.28125	0	0	0.015815	0.795208	4.98398	0	0	0	5.81786	0	0	0	-0.79	-1.16	-2.53	456.28	244.09	12.89	18.33	0
Hypoxanthine	Pure water	Pure methanol	gradient elution	2.2	5.57333	0.0940392	0.45	0	184.918	-0.0837538	0	0	0	8	227.824	-171.705	0.962155	0.00358131	0	-0.178483	0.936594	0	0.977857	0	0	0	5.09292	0	0	0.00372035	0.728136	4.79454	0	0	0	11.1639	0	0	0	-0.65	-1.16	-2.04	460.81	269.09	2.51	11.33	0
Xanthine	Pure water	Pure methanol	gradient elution	2.41	6.94533	-0.355118	-0.21	0	185.095	0.0136869	0	0	0	-39.08	-23.5938	51.4977	0.85468	0.0206783	0	-0.142003	1.21659	0	0.977215	0	0	0	7.00843	0	0	0.0130324	0.726429	14.7625	0	0	0	0	0	0	0	-0.57	-1.12	-2.01	462.13	285.08	6.06	22.93	0
Guanine	Pure water	Pure methanol	gradient elution	2.2	5.57333	0.245461	0.53	0	183.104	0.252645	0	6.0434	0	-34.5625	-126.049	-267.038	0.929041	0.017625	0	-0.158414	1.18512	0	0.977827	0	0	0	4.98125	0	0	0.0130324	0.739928	9.77852	0	0	0	11.1639	0	0	0	-1.03	-1.62	-2.51	460.81	284.1	3.28	13.86	0
Uracil	Pure water	Pure methanol	gradient elution	1.49	1	0.175547	-0.76	0	0	0.20339	0	0	0	-49.0833	0	51.7353	0	0.0294644	0	-0.145434	1.43607	0	0.977161	0	0	0	4.26444	0	0	0.015815	0.746961	9.77852	0	0	0	0	0	0	0	-0.14	-0.31	-1.67	456.28	113.04	6.46	24.76	0
Adenine	Pure water	Pure methanol	gradient elution	4.11	18.052	0.863726	1.46	0	184.918	-0.079507	0	0	0	-9.66667	256.043	-97.6406	0.874208	0.00452556	0	-0.225925	0.799775	0	0.99388	0	0	0	2.82671	0	0	0.00372035	0.726429	0	0	0	0	16.9817	0	0	0	-0.94	-1.32	-1.96	472.13	268.1	11.17	15	0
Cytidine	Pure water	Pure methanol	gradient elution	2	4.26667	-0.510284	-0.02	4.16327	169.415	0.0668159	-2.00556	7.58074	-8.60617	-0.142222	-162.492	114.67	-4.55627	0.00237271	-0.114785	-0.173472	0.958414	0.945774	0.977702	0	-0.452502	0	0	0	0	0.0219589	0.743214	4.5671	0	0	0	0	0	1	0	-1.09	-1.51	-3.17	459.54	112.05	6.86	45.67	0
Inosine	Pure water	Pure methanol	gradient elution	4.17	18.444	-1.19484	-1.89	5.35714	169.805	-0.101128	-2.70968	7.21745	-2.62545	37.0198	105.495	-117.475	2.62073	-0.0026822	-0.123529	-0.15604	0.923862	1.12176	0.977719	0	-0.421262	0	2.38292	0	0	0.0149466	0.729478	9.36164	0	0	0	0	0	1	0	-1.81	-2.31	-2.91	472.46	137.05	9.42	29.87	0
Xanthosine	Pure water	Pure methanol	gradient elution	2.55	7.86	-1.19832	-1.17	5.96667	169.774	0.140549	-3.3125	11.7093	-7.90332	-5.75	-0.995879	79.4792	1.15486	0.00466733	-0.12619	-0.13932	0.981139	1.27513	0.977214	0	-0.47375	0	4.40017	0	0	0.0195069	0.73973	19.3296	0	0	0	0	0	1	0	-1.33	-1.81	-3.1	463	153.04	15.45	32.43	0
Guanosine	Pure water	Pure methanol	gradient elution	4.3	19.2933	-0.640633	-0.81	5.45161	170.413	0.270673	-7.46281	14.5278	-6.16667	0.200184	-141.2	-123.263	0.0426856	0.00370835	-0.257265	-0.134567	0.991755	1.1482	0.977701	0	-0.446918	0	2.29959	0	0	0.390138	0.744966	14.3456	0	0	0	0	0	1	0	-2.13	-2.68	-3.18	473.18	152.06	11.43	36.02	0
Uridine	Pure water	Pure methanol	gradient elution	1.21	1	-1.56881	-0.52	4.39216	169.337	-0.0564181	1.80737	7.79994	-8.20627	-15.0868	-141.765	124.291	-3.09495	0.00479804	0.121445	-0.147671	1.00023	1.1985	0.977214	0	-0.479335	0	2.0005	0	0	0.0219589	0.732168	14.3456	0	0	0	0	0	1	0	0.1	-0.2	-2.3	456.28	245.08	5.57	34.25	0
Adenosine	Pure water	Pure methanol	gradient elution	5.28	25.696	0.0332728	1.04	4.86207	170.386	-0.089798	-3.91895	5.23438	-3.44618	23.1875	108.274	-131.049	1.21257	-0.00231705	-0.159468	-0.169932	0.942973	0.96672	0.987734	0	-0.390397	0	0	0	0	0.0149466	0.723325	4.5671	0	0	0	11.1639	0	1	0	-1.13	-1.84	-1.74	478.38	136.06	2.18	39.95	0
D-Pantothenic acid	0.1% formic acid water	0.1% formic acid methanol	gradient elution	5.34	26.088	-0.855032	-0.57	3.1875	165.167	0.172518	-2.9834	32.1706	-3.39523	-98.1133	112.195	197.571	-4.13803	0.00179049	-0.118086	-0.348219	0.850036	0.967632	0.972576	0.117851	-0.56422	0	0	0	0	0.0403765	0.626558	9.58907	0	5.41499	0	0	0	0	0	-1.17	0.36	-2.31	479.1	220.12	7.46	23.15	0
Niacinamide	0.1% formic acid water	0.1% formic acid methanol	gradient elution	2.18	5.44267	0.387904	0.28	0	176.484	0.12616	0	2.37136	0	-33.3556	-51.3149	111.629	0.917752	0.00515938	0	-0.381849	1.13373	0	0.97302	0	0	0	0	0	0	0.012187	0.73139	9.77852	0	0	0	5.56345	18.3296	0	0	0.24	0.24	-1.34	461.17	123.06	2.95	12.91	0
Pyridoxal	0.1% formic acid water	0.1% formic acid methanol	gradient elution	1.62	1.784	0.532604	0.12	0.25	173.88	-0.0880824	0.979592	-3.84511	3.97298	2.18821	-133.402	-158.857	0.491843	-0.003459	0.521739	-0.147566	0.752946	0	0.957469	0	-0.296713	0.509491	0	0	0	0.0176922	0.78577	9.77852	5.74951	6.92374	5.74951	17.5435	6.92374	0	0	1.19	0.93	-1.68	457.57	168.07	3.53	18.08	0
Biotin	0.1% formic acid water	0.1% formic acid methanol	gradient elution	7.18	38.1093	-0.118143	-0.5	1.73457	166.727	-0.0469806	-2.05078	-22.899	-9.19049	-119.098	-237.505	61.8081	-0.0757756	0.00826852	-0.104895	-0.135185	0.866324	1.40842	0.972733	0	3.84562	0	0	0	0	0.0155944	0.604004	4.79454	0	0	0	5.24994	0	2	0	-1.5	-0.95	-1.78	487.99	245.1	8.59	24.78	1
Pyridoxine	0.1% formic acid water	0.1% formic acid methanol	gradient elution	2.2	5.57333	1.02219	0.74	0.16129	177.19	-0.0286503	0.816635	-1.19975	2.91367	17.586	11.4992	-346.724	4.7732	-0.00287479	0.455696	-0.145423	0.711448	0	0.987195	0	-0.512083	0	0	0	0	0.0176922	0.681116	4.98398	5.74951	6.92374	5.74951	16.8208	6.92374	0	0	0.26	0.18	-1.93	461.3	170.08	9.44	32	0
Pyridoxamine	0.1% formic acid water	0.1% formic acid methanol	gradient elution	0.85	1	0.812509	0.47	0.131579	179.43	-0.0324451	0.75	0.310957	2.22454	32.375	21.124	-584.022	7.83375	-0.00221284	0.428571	-0.144951	0.724291	0	0.987195	0	0.0679167	0	0	0	0	0.0176922	0.739481	4.98398	5.74951	6.92374	5.74951	16.8208	6.92374	0	0	0.77	0.53	-2.14	456.78	169.1	2.37	18.04	0
Nicotinic acid	0.1% formic acid water	0.1% formic acid methanol	gradient elution	0.91	1	-0.412635	0.14	0	177.102	0.151025	0	1.71485	0	-13.7755	-76.6296	87.6328	1.3341	0.00526081	0	-0.379721	0.847878	0	0.97302	0	0	0	0	0	0	0.012187	0.741757	4.98398	0	0	0	0	6.06637	0	0	0	0.71	-2.02	456.78	265.11	0	36.27	1
Glycine	0.1% formic acid water	0.1% formic acid methanol	gradient elution	0.79	1	-0.203815	-0.75	0	0	-0.23662	0	0	0	-18	0	67.9816	0	0.00646842	0	0.00697033	1.1298	0	0.972633	0	-0.277778	0	0	0	0	0.0288316	0.879588	4.79454	0	0	0	0	0	0	0	0.42	1.18	-1.56	456.78	76.04	1.77	14.8	0
Alanine	0.1% formic acid water	0.1% formic acid methanol	gradient elution	0.81	1	-0.0319436	-0.22	0	0	-0.300229	0	0	0	-26.5917	0	158.987	0	0.00448718	0	-0.145146	0.920777	0	0.972646	0	0	0	0	0	0	0.0452465	0.792124	4.79454	0	0	0	0	0	0	0	0.84	1.54	-1.5	456.78	90.06	1.93	15.51	0
Leucine	0.1% formic acid water	0.1% formic acid methanol	gradient elution	2.62	8.31733	0.418643	0.19	0	182.681	-0.243313	0	3.94249	0	-48.6446	-337.533	-268.032	6.87103	0.00200733	0	-0.212961	0.679665	0	0.972732	0	0.550926	0	0	0	0	0.0419591	0.620628	4.79454	0	5.91791	0	12.3387	0	0	0	1.25	1.96	-1.25	463.9	132.1	1.75	23.12	0
Isoleucine	0.1% formic acid water	0.1% formic acid methanol	gradient elution	2.42	7.01067	0.390729	0.17	0	183.24	-0.209198	0	1.97125	0	6.35537	-58.3046	156.045	5.01987	0.00165898	0	-0.157321	0.656972	0	0.972768	0	0.812963	0	0	0	0	0.0358656	0.620628	4.79454	0	5.91791	0	0	0	0	0	1.36	2.03	-1.22	462.67	132.1	1.86	24.73	0
Valine	0.1% formic acid water	0.1% formic acid methanol	gradient elution	1.26	1	0.341417	0.06	0	184.918	-0.199833	0	0	0	-24.6981	159.61	98.2167	1.90852	0.00210128	0	-0.306527	0.701903	0	0.97275	0	0	0	0	0	0	0.0450994	0.653082	4.79454	0	5.91791	0	0	13.8475	0	0	1.05	2.26	-0.95	456.78	118.09	7.95	13.49	0
Proline	0.1% formic acid water	0.1% formic acid methanol	gradient elution	0.96	1	0.344401	0.3	0	184.918	-0.108799	0	0	0	-17.8858	132.916	-146.36	1.58933	0.00115071	0	-0.0232467	0.687688	0	0.973023	0	2.64213	0	0	0	0	0.0137104	0.674795	4.79454	0	0	0	0	0	1	0	1.15	0.95	-1.39	456.78	116.07	3.61	21.36	0
Phenylalanine	0.1% formic acid water	0.1% formic acid methanol	gradient elution	4.62	21.384	0.205536	0.25	2.9	168.347	-0.271772	1.38374	-12.174	-5.11494	-47.5312	-68.6233	75.7902	-6.16042	0.00160522	0.387302	-0.0559979	0.729389	1.70862	0.972872	0	0.385093	0	0	0	0	0.0179864	0.677269	4.79454	0	0	0	6.42082	0	0	0	0	0.25	-1.21	475.34	166.09	2.66	22.91	0
Methionine	0.1% formic acid water	0.1% formic acid methanol	gradient elution	1.5	1	0.165037	-0.03	0.6875	170.668	-0.285717	0.3675	-19.2941	2.07871	-66	-146.383	212.133	-3.99597	0.00183107	0.28655	-0.112273	0.829346	0	0.972807	0	1.36505	0	0	0	0	0.0259416	0.699208	4.79454	0	0	0	6.42082	11.7619	0	0	1.23	2.07	-1.52	456.78	150.06	4.25	22.93	1
Tryptophan	0.1% formic acid water	0.1% formic acid methanol	gradient elution	5.75	28.7667	-0.106933	-0.06	4	167.646	-0.358401	2.4952	-10.8272	-11.9136	-41	131.282	-111.107	-3.61455	0.00129651	0.217584	-0.0621933	0.737639	1.96944	0.97287	0	0.346574	0	3.08396	0	0	0.0155115	0.728807	4.79454	0	0	0	6.42082	0	0	0	-0.77	-0.71	-1.35	481.17	205.1	5.34	22.25	0
Serine	0.1% formic acid water	0.1% formic acid methanol	gradient elution	0.79	1	-0.319456	-0.29	0	184.918	-0.0793225	0	0	0	0	42.2324	150.707	0.184897	0.000371321	0	-0.155377	0.844324	0	0.972823	0	-0.50463	0	0	0	0	0.0333535	0.835752	4.79454	0	0	0	0	0	0	0	0.59	1.41	-1.57	456.78	106.05	3.06	19.55	0
Glutamine	0.1% formic acid water	0.1% formic acid methanol	gradient elution	0.82	1	-0.342005	-0.25	5.82353	183.925	-0.369256	0.32	-23.3139	3.29389	-64.08	59.0726	203.805	3.47946	0.00893018	0.296296	-0.117783	1.0135	0	0.97149	0	0.123148	0	0	0	0	0.0377632	0.737981	9.58907	0	0	0	0	0	0	0	-0.23	0.89	-2.43	456.78	147.08	6.95	22.19	0
Threonine	0.1% formic acid water	0.1% formic acid methanol	gradient elution	0.84	1	-0.175984	-0.22	0	184.918	-0.0112833	0	0	0	-29.827	143.955	132.723	0.966889	0.00134405	0	-0.172276	1.00328	0	0.97275	0	0	0	0	0	0	0.0450994	0.775358	4.79454	0	0	0	0	0	0	0	1	1.69	-1.63	456.78	120.07	4	17.53	0
Cysteine	0.1% formic acid water	0.1% formic acid methanol	gradient elution	0.88	1	-0.502485	-0.51	0	184.918	-0.191786	0	0	0	11.3469	58.4591	145.624	0.439189	0.00259616	0	-0.10926	0.859568	0	0.972823	0	0.189815	0	0	0	0	0.0333535	0.873274	4.79454	0	0	0	0	0	0	0	1.01	1.64	-1.19	456.78	122.03	3.06	20.11	1
Asparagine	0.1% formic acid water	0.1% formic acid methanol	gradient elution	0.8	1	-0.463518	-0.35	0	186.323	-0.360932	0	4.38312	0	-81.7785	-137.418	-17.398	2.35764	0.0116293	0	-0.169425	1.1441	0	0.971481	0	-0.310185	0	0	0	0	0.0419591	0.772083	9.58907	0	0	0	0	0	0	0	-0.51	0.57	-2.46	456.78	133.06	3.88	19.29	0
Glutamic acid	0.1% formic acid water	0.1% formic acid methanol	gradient elution	0.85	1	-0.361973	-0.29	8.64286	181.513	-0.386969	0.177285	-19.313	2.12034	-49.3463	86.6142	198.188	2.45247	0.00983419	0.316832	-0.104615	0.944428	0	0.97149	0	-0.224074	0	0	0	0	0.0377632	0.71972	9.58907	0	0	0	0	0	0	0	-0.05	1.4	-1.87	456.78	148.06	8.05	20.54	1
Lysine	0.1% formic acid water	0.1% formic acid methanol	gradient elution	0.71	1	0.159166	-0.3	1.43333	176.871	-0.259629	1.22222	3.55556	-13.1944	17.5556	4.08586	74.0145	-2.66724	0.00164722	0.285714	-0.0802053	0.674361	2.15039	0.972806	0	2.76768	0	0	0	0	0.0233474	0.606647	4.79454	0	0	0	12.9656	0	0	0	0.5	2.08	-1.6	456.78	147.11	5.99	18.74	0
Arginine	0.1% formic acid water	0.1% formic acid methanol	gradient elution	0.75	1	0.32279	0.16	2.80556	179.105	-0.208656	-0.739645	11.78	26.3079	-58.3964	91.4679	41.1409	-1.50151	0.0136703	-0.0753466	-0.0466721	0.941005	0.851054	0.972728	0	1.37579	0	0	3.6796	0	0.0314694	0.67178	9.78694	0	0	0	19.3864	0	0	0	-0.44	1.17	-2.22	456.78	175.12	9.11	22.26	0
Histidine	0.1% formic acid water	0.1% formic acid methanol	gradient elution	0.73	1	0.102394	-0.01	4.19048	179.568	-0.27497	0.3025	-5.77778	1.17361	-71.6	-105.157	58.7578	1.89288	0.00298234	0.552511	-0.123024	0.886498	0	0.972873	0	0.287037	0	2.76847	0	0	0.0196215	0.828206	4.79454	0	0	0	0	6.19684	0	0	-0.54	0.28	-1.91	456.78	156.08	5.04	14.6	0
Citrulline	0.1% formic acid water	0.1% formic acid methanol	gradient elution	0.87	1	-0.383194	-0.39	3	178.858	-0.269396	0.16	0.810578	45.5554	-38.472	-21.8523	46.9787	1.06057	0.013287	0.0208333	-0.066654	0.896729	0.980287	0.971489	0	1.19676	0	0	0	0	0.0314694	0.687895	4.79454	0	0	0	19.3864	0	0	0	-0.54	0.87	-2.92	456.78	176.1	7.6	24.14	0
Taurine	0.1% formic acid water	0.1% formic acid methanol	gradient elution	0.81	1	-0.854276	-0.86	0	184.918	0.274994	0	0	0	-63.9388	125.792	-57.6948	0.488671	0.00701129	0	-0.187146	1.21226	0	0.968528	0	-0.383102	0	0	0	0	0.0505076	0.75513	4.55275	0	0	0	0	0	0	0	0.11	1.25	-1.79	456.78	126.02	3.57	10.55	1
Aspartic acid	0.1% formic acid water	0.1% formic acid methanol	gradient elution	0.82	1	-0.490165	-0.44	0	185.095	-0.407537	0	2.88292	0	-69.8906	-117.694	46.8817	1.67049	0.0133137	0	-0.150448	1.083	0	0.971481	0	-0.532407	0	0	0	0	0.0419591	0.75299	9.58907	0	0	0	0	0	0	0	-0.2	0.87	-2.4	456.78	134.05	2.79	21.36	0
Tyrosine	0.1% formic acid water	0.1% formic acid methanol	gradient elution	4.3	19.2933	0.381554	0.14	3.51613	167.88	-0.290316	0.767361	-9.83922	28.5537	-74	-214.017	199.551	-7.94974	0.00320108	0.13194	-0.0847118	0.844114	1.07785	0.972817	0	0.273426	0	0	0	0	0.0247684	0.721847	4.79454	5.74951	0	5.74951	0	12.1327	0	0	-0.58	-0.16	-1.86	473.61	182.08	4.34	23.28	0
Hypotaurine	0.1% formic acid water	0.1% formic acid methanol	gradient elution	0.82	1	-0.603928	-0.48	0	184.918	0.209276	0	0	0	-38.6391	109.154	-29.781	0.569958	0.00335309	0	-0.195251	1.14817	0	0.972911	0	0.46142	0	0	0	0	0.0240263	0.792124	0	0	0	0	0	0	0	0	0.02	0.84	-1.88	456.78	110.03	5.56	19	1
L-Hydroxyproline	0.1% formic acid water	0.1% formic acid methanol	gradient elution	0.83	1	-0.0798042	-0.07	0	185.051	-0.400291	0	1.21408	0	-57	-45.8895	-60.5483	2.15365	0.000677485	0	-0.0570443	0.870699	0	0.972959	0	0.728472	0	0	0	0	0.0239818	0.75264	4.79454	0	0	0	12.9656	0	1	0	0.21	0.21	-2.18	456.78	132.07	3.05	18.5	0
Spermidine	0.1% formic acid water	0.1% formic acid methanol	gradient elution	0.62	1	0.174233	0.47	0.465116	172.353	0.0605035	-0.475624	-1.28864	-1.40785	1.46492	-28.0035	28.3531	-2.84336	-0.000981045	-0.0793651	-0.0851324	0.886785	0.985447	0.987144	0	7.08338	0	0	0	0	-8.88e-17	0.439083	0	0	0	0	0	0	0	0	1.49	2.68	-1.89	456.78	146.17	1.9	19.87	0
N-omiga-acetylhistamine	0.1% formic acid water	0.1% formic acid methanol	gradient elution	1.01	1	0.89465	0.79	3.375	170.64	0.141687	0.5	-1.48646	-4.16208	-108.967	321.703	104.971	-0.182039	0.00368699	0.0827068	0.0116427	1.42407	1.03534	0.972968	0	1.46935	0	2.94846	0	0	0.0115018	0.728783	4.79454	0	0	0	6.54476	12.5242	0	0	-0.11	0.61	-2.03	456.78	154.1	4.66	14.64	0
L-pyroglutamic acid	0.1% formic acid water	0.1% formic acid methanol	gradient elution	0.81	1	-0.452317	-0.52	0	185.007	-0.504649	0	0	0	-50.1875	43.7405	-14.2835	1.35384	0.00711642	0	-0.000584856	0.965489	0	0.972787	0	0.768981	0	0	0	0	0.0239818	0.755265	4.79454	0	0	0	12.8416	0	1	0	0.03	0.27	-1.92	456.78	130.05	7.17	21.17	0
Tyramine	0.1% formic acid water	0.1% formic acid methanol	gradient elution	2.73	9.036	0.298632	0	1.04762	173.041	-0.00213992	1.13379	7.05329	-6.54371	-27.737	-62.072	-91.5163	-2.59498	0.00106733	0.515464	-0.0525485	0.941397	4.08884	0.987822	0	1.53279	0	0	0	0	0.00885151	0.687949	0	5.74951	0	5.74951	12.2943	12.1327	0	0	0.76	0.64	-1.3	464.57	138.09	2.6	18.57	0
Histamine	0.1% formic acid water	0.1% formic acid methanol	gradient elution	0.66	1	0.356493	0.69	0	182.607	0.128306	0	0.715302	0	-32.1488	-0.949554	-137.239	2.02706	-3.71e-05	0	-0.119711	0.938476	0	0.987943	0	1.57162	0	2.94694	0	0	-0.00220476	0.757906	0	0	0	0	6.54476	12.5242	0	0	0.15	0.52	-1.69	456.78	112.09	4.89	18.47	0
AaC	0.1% formic acid water	0.1% formic acid methanol	gradient elution	8.33	45.6227	0.818222	0.83	1.96154	162.88	0.146992	3.60681	-1.57745	-1.67113	-31.3875	15.0306	-109.367	-5.02864	0.00641062	0.542045	-0.12069	1.21336	1.00514	0.993852	0	0	0	3.22769	0	0	0.00506264	0.581567	0	0	0	0	5.81786	0	0	0	-0.51	-1.81	-0.59	493.07	184.09	2.51	12.59	0
IQx	0.1% formic acid water	0.1% formic acid methanol	gradient elution	5.76	28.832	0.893521	0.76	1.84375	172.366	0.0162182	3.5625	-5.28337	0.127315	-17.4444	-134.658	-110.419	1.36099	0.00422157	0.446475	-0.0245659	1.15317	0.407619	0.992546	0	0	0	0	0	0	0.00955711	0.704411	9.96796	0	0	0	5.94834	12.3937	0	0	-0.84	-1.44	-1.36	481.22	200.09	8.8	14.84	0
MeAaC	0.1% formic acid water	0.1% formic acid methanol	gradient elution	9.17	51.1107	0.658007	0.95	1.71429	160.865	0.0545901	5.56509	-1.16457	-0.829882	-35	-364.037	150.544	-5.79105	0.00534724	0.422697	-0.281273	1.11919	0.665968	0.992526	0	0	0	3.25491	0	0	0.0106796	0.661372	0	0	6.92374	0	5.81786	0	0	0	-0.5	-1.96	-0.52	496.57	198.1	2.95	12.56	0
8-MeIQx	0.1% formic acid water	0.1% formic acid methanol	gradient elution	6.57	34.124	0.961965	0.77	1.82927	168.51	-0.0121457	7.81893	-1.98217	-7.89712	-41.2442	-384.006	-240.894	-0.460649	0.00429773	0.523993	-0.0419453	1.28946	0.879974	0.992546	0	0	0	0	0	0	0.0155944	0.703025	4.98398	0	6.92374	0	5.94834	6.19684	0	0	-0.94	-1.56	-1.33	485.15	214.11	7.72	15.22	0
MeIQ	0.1% formic acid water	0.1% formic acid methanol	gradient elution	5.76	28.832	0.97199	0.83	1.16981	167.004	0.00823206	4.08163	0.403061	0.413265	-24	-305.586	-929.345	-10.6339	0.005709	0.386473	-0.183861	1.15048	0.417761	0.992544	0	0	0	0	0	0	0.0145421	0.693166	4.98398	0	6.92374	0	5.94834	6.19684	0	0	-0.48	-1.41	-1.02	481.22	213.11	9.17	16.13	0
IQ[4,5-b]	0.1% formic acid water	0.1% formic acid methanol	gradient elution	6.61	34.3853	0.976206	0.78	2.6	160.132	0.102611	6.232	-3.88071	-0.0924444	-22.3744	-282.441	411.565	-12.6158	0.0072498	0.470411	-0.127017	1.09071	0.528921	0.992546	0	0	0	0	0	0	0.0106796	0.667055	0	0	0	0	11.5955	0	0	0	-0.95	-1.6	-1.26	485.34	199.1	10.84	16.69	0
Harman	0.1% formic acid water	0.1% formic acid methanol	gradient elution	7.43	39.7427	1.23397	1.06	1.45161	162.332	-0.147276	3.9375	-1.09274	2.32557	-26	-87.8478	-263.891	-8.21315	-0.000671716	0.931034	0.0601656	1.19402	0	0.993878	0	0	0	3.38375	0	0	0.00386002	0.61804	4.98398	0	6.92374	0	0	0	0	0	0.04	-1.58	-0.53	489.12	183.09	4.55	16.34	0
IQ	0.1% formic acid water	0.1% formic acid methanol	gradient elution	5.4	26.48	1.13825	0.89	1.68571	166.537	-0.00633223	3.1312	-2.95182	-0.471467	-19.1744	-120.622	-181.98	-9.63379	0.00659881	0.393921	-0.123164	1.20767	0.486488	0.992546	0	0	0	0	0	0	0.00955711	0.679819	4.98398	0	0	0	5.94834	6.19684	0	0	-0.41	-1.36	-1.02	479.41	199.1	8.83	15.75	0
Norharman	0.1% formic acid water	0.1% formic acid methanol	gradient elution	6.96	36.672	1.06649	1.02	1.77273	167.047	-0.0911327	0.655329	-0.223923	0.393109	-21.7959	43.0066	-221.607	-3.45951	-0.00147856	1.22458	0.0112688	0.887975	0	1.7516	0	0	0	3.31546	0	0	-0.00271355	0.558507	4.98398	0	0	0	0	0	0	0	-0.06	-1.48	-0.6	486.98	169.08	4.61	16.32	0
DMIP	0.1% formic acid water	0.1% formic acid methanol	gradient elution	5.1	24.52	1.17395	0.94	0.125	163.631	0.11134	2.42975	1.11111	2.66667	-54.0331	-558.981	13.6029	-16.5283	0.00799472	0.590361	-0.333732	1.0747	0	0.992546	0	0	0	0	0	0	0.0193894	0.732239	0	0	6.92374	0	11.5955	6.19684	0	0	-0.73	-0.6	-1.41	477.87	163.1	9.99	17.5	0
Phe-p-1	0.1% formic acid water	0.1% formic acid methanol	gradient elution	7.18	38.1093	1.17015	1.05	2.53846	162.062	-0.0397603	0.964083	-1.98173	-1.03592	-43.1739	-37.7978	172.434	-8.27026	0.00354391	0.152057	-0.0635823	1.05992	1.42371	0.99385	0	0	0	0	0	0	0.00415694	0.499656	0	11.1269	0	0	5.81786	6.19684	0	0	-0.01	-1.31	-0.51	487.99	171.09	3.22	14.9	0
PhIP	0.1% formic acid water	0.1% formic acid methanol	gradient elution	7.86	42.552	0.979957	0.83	3.55814	159.92	0.107045	-1.02021	1	-3	-28.409	-197.079	416.339	-12.8847	0.00574838	-0.0536384	-0.118507	0.957673	1.15047	0.992546	0	0	0	0	0	0	0.00942314	0.623992	0	11.1269	0	0	11.5955	0	0	0	-1.1	-2.09	-1.18	491.03	225.11	10.11	15.87	0
7,8-DiMeIQx	0.1% formic acid water	0.1% formic acid methanol	gradient elution	7.25	38.5667	1.02188	0.86	1.86	165.806	-0.0452133	-2.17	-4.19506	-4.93741	-37	-393.581	48.3821	-8.11469	0.00432243	-0.108122	-0.00311479	1.41426	1.1293	0.992526	0	0	0	0	0	0	0.019931	0.647383	0	0	13.8475	0	5.94834	0	0	0	-1.03	-1.7	-1.3	488.31	228.12	6.62	15.48	0
Sarcosine	0.1% formic acid water	0.1% formic acid methanol	gradient elution	0.81	1	-0.0982904	-0.22	0	184.918	-0.0870714	0	0	0	-31.4142	102.506	-139.296	0.647508	0.00144374	0	0.0438904	0.979599	0	0.972911	0	0.0416667	0	0	0	0	0.0240263	0.758664	4.79454	0	0	0	0	7.04767	0	0	1.03	1.7	-1.4	456.78	90.06	2.92	24.65	0
Creatinine	0.1% formic acid water	0.1% formic acid methanol	gradient elution	0.89	1	0.773526	0.27	0	0	0.152068	0	0	0	-90	0	354.201	0	0.0113129	0	-0.314768	1.21391	0	0.977938	0	0.325231	0	0	3.45139	1.59954	0.0269795	0.733849	4.79454	0	0	0	12.5043	11.9476	1	0	-0.85	-0.34	-2.16	456.78	114.07	11.98	15.98	0
L-Dihydroorotic acid	0.1% formic acid water	0.1% formic acid methanol	gradient elution	1.01	1	-1.16322	-1.33	0	187.676	-0.668696	0	2.87668	0	-93.699	-261.215	52.8209	2.2227	0.023258	0	0.00627894	1.17376	0	0.972618	0	-0.207269	0	0	0	0	0.0292718	0.789096	10.1113	0	0	0	0	0	0	1	-0.28	-0.17	-2.23	456.78	159.04	5.18	17.25	0
L-Carnosine	0.1% formic acid water	0.1% formic acid methanol	gradient elution	0.75	1	-0.0437508	-0.78	4.07273	169.76	-0.217252	0.471111	-6.65895	-14.0108	-64	-135.378	-24.5087	-9.90795	0.00368761	0.0268763	-0.0283864	1.01613	1.00508	0.972726	0	0.486737	0	2.7773	0	0	0.017749	0.74402	4.79454	0	0	0	5.69393	0	0	0	-0.98	0.05	-3.29	456.78	227.11	12.99	20.43	0
Uric acid	0.1% formic acid water	0.1% formic acid methanol	gradient elution	1.88	3.48267	-0.0014044	-0.91	9	185.184	0.250054	0	0	0	-88.5	16.056	25.4208	1.01156	0.0348402	0	-0.116719	1.36475	0	0.976844	0	0	0	8.70546	0	0	0.0207925	0.586893	24.7305	0	0	0	0	0	0	0	-0.98	-1.76	-2.7	459.26	169.04	4.89	20.01	0
Betaine	0.1% formic acid water	0.1% formic acid methanol	gradient elution	0.87	1	0.622248	0.38	0	0	0.225178	0	0	0	-195.141	0	-361.885	0	-0.00155603	0	-0.418567	0.585225	0	0.97275	0	0.0694444	0	0	0	0	0.0622139	0.469603	0	0	0	0	4.48303	21.143	0	0	-2.41	0.21	-2.88	456.78	118.09	15.35	14.25	0
Cytosine	0.1% formic acid water	0.1% formic acid methanol	gradient elution	0.9	1	0.877091	0.25	0	0	0.333051	0	0	0	-59.5266	0	103.863	0	0.025124	0	-0.23766	1.29445	0	0.977719	0	0	0	2.28125	0	0	0.015815	0.795208	4.98398	0	0	0	5.81786	0	0	0	-0.79	-1.16	-2.53	456.78	244.09	12.89	18.33	0
Hypoxanthine	0.1% formic acid water	0.1% formic acid methanol	gradient elution	2.08	4.78933	0.0913765	-0.06	0	184.918	-0.0837538	0	0	0	8	227.824	-171.705	0.962155	0.00358131	0	-0.178483	0.936594	0	0.977857	0	0	0	5.09292	0	0	0.00372035	0.728136	4.79454	0	0	0	11.1639	0	0	0	-0.64	-1.16	-2.06	460.54	269.09	2.51	11.33	0
Xanthine	0.1% formic acid water	0.1% formic acid methanol	gradient elution	2.5	7.53333	-0.351094	-0.37	0	185.095	0.0136869	0	0	0	-39.08	-23.5938	51.4977	0.85468	0.0206783	0	-0.142003	1.21659	0	0.977215	0	0	0	7.00843	0	0	0.0130324	0.726429	14.7625	0	0	0	0	0	0	0	-0.59	-1.12	-2	463.17	285.08	6.06	22.93	0
Guanine	0.1% formic acid water	0.1% formic acid methanol	gradient elution	1.52	1.13067	0.22525	0.06	0	183.104	0.252645	0	6.0434	0	-34.5625	-126.049	-267.038	0.929041	0.017625	0	-0.158414	1.18512	0	0.977827	0	0	0	4.98125	0	0	0.0130324	0.739928	9.77852	0	0	0	11.1639	0	0	0	-0.96	-1.63	-2.61	456.91	284.1	3.28	13.86	0
Uracil	0.1% formic acid water	0.1% formic acid methanol	gradient elution	1.49	1	0.174399	-0.62	0	0	0.20339	0	0	0	-49.0833	0	51.7353	0	0.0294644	0	-0.145434	1.43607	0	0.977161	0	0	0	4.26444	0	0	0.015815	0.746961	9.77852	0	0	0	0	0	0	0	-0.14	-0.31	-1.67	456.78	113.04	6.46	24.76	0
Adenine	0.1% formic acid water	0.1% formic acid methanol	gradient elution	1.45	1	0.836807	0.52	0	184.918	-0.079507	0	0	0	-9.66667	256.043	-97.6406	0.874208	0.00452556	0	-0.225925	0.799775	0	0.99388	0	0	0	2.82671	0	0	0.00372035	0.726429	0	0	0	0	16.9817	0	0	0	-0.75	-1.26	-2.24	456.78	268.1	11.17	15	0
Beta-Thymidine	0.1% formic acid water	0.1% formic acid methanol	gradient elution	4.95	23.54	-1.42188	-1.71	3.76786	167.29	0.287893	2.82726	-4.76015	-3.13025	-46.2508	-217.644	116.213	0.246177	0.00686201	0.128257	-0.297668	1.07617	1.14028	0.977251	0	-0.105784	0	2.15934	0	0	0.0229493	0.706637	14.3456	0	6.92374	0	5.56345	6.92374	1	0	-0.98	-1.1	-1.84	477.09	243.1	4.01	45.1	0
Cytidine	0.1% formic acid water	0.1% formic acid methanol	gradient elution	1.06	1	-0.513919	-0.7	4.16327	169.415	0.0668159	-2.00556	7.58074	-8.60617	-0.142222	-162.492	114.67	-4.55627	0.00237271	-0.114785	-0.173472	0.958414	0.945774	0.977702	0	-0.452502	0	0	0	0	0.0219589	0.743214	4.5671	0	0	0	0	0	1	0	-0.86	-1.38	-3.27	456.78	112.05	6.86	45.67	0
Inosine	0.1% formic acid water	0.1% formic acid methanol	gradient elution	4.18	18.5093	-1.19748	-1.24	5.35714	169.805	-0.101128	-2.70968	7.21745	-2.62545	37.0198	105.495	-117.475	2.62073	-0.0026822	-0.123529	-0.15604	0.923862	1.12176	0.977719	0	-0.421262	0	2.38292	0	0	0.0149466	0.729478	9.36164	0	0	0	0	0	1	0	-1.81	-2.31	-2.91	472.95	137.05	9.42	29.87	0
Xanthosine	0.1% formic acid water	0.1% formic acid methanol	gradient elution	4.65	21.58	-1.05977	-1.15	5.96667	169.774	0.140549	-3.3125	11.7093	-7.90332	-5.75	-0.995879	79.4792	1.15486	0.00466733	-0.12619	-0.13932	0.981139	1.27513	0.977214	0	-0.47375	0	4.40017	0	0	0.0195069	0.73973	19.3296	0	0	0	0	0	1	0	-1.76	-2.15	-2.78	475.5	153.04	15.45	32.43	0
Guanosine	0.1% formic acid water	0.1% formic acid methanol	gradient elution	4.21	18.7053	-0.641073	-0.56	5.45161	170.413	0.270673	-7.46281	14.5278	-6.16667	0.200184	-141.2	-123.263	0.0426856	0.00370835	-0.257265	-0.134567	0.991755	1.1482	0.977701	0	-0.446918	0	2.29959	0	0	0.390138	0.744966	14.3456	0	0	0	0	0	1	0	-2.13	-2.67	-3.19	473.12	152.06	11.43	36.02	0
Adenosine	0.1% formic acid water	0.1% formic acid methanol	gradient elution	4.23	18.836	0.0758472	0.13	4.86207	170.386	-0.089798	-3.91895	5.23438	-3.44618	23.1875	108.274	-131.049	1.21257	-0.00231705	-0.159468	-0.169932	0.942973	0.96672	0.987734	0	-0.390397	0	0	0	0	0.0149466	0.723325	4.5671	0	0	0	11.1639	0	1	0	-0.92	-1.6	-1.84	473.23	136.06	2.18	39.95	0

## Sheet: Original data
Compounds	slope	log（slope）	Mobile phase A	Mobile phase B	Elution conditions	Peak time
D-Pantothenic acid	5227.92	3.71833	Pure water	Pure methanol	gradient elution	1.7
Niacinamide	238725	5.3779	Pure water	Pure methanol	gradient elution	4.21
Pyridoxal	439945	5.6434	Pure water	Pure methanol	gradient elution	3.4
Biotin	4051.77	3.60764	Pure water	Pure methanol	gradient elution	5.13
Pyridoxine	1475840	6.16904	Pure water	Pure methanol	gradient elution	4.51
Pyridoxamine	840046	5.9243	Pure water	Pure methanol	gradient elution	4.7
Thiamine	934307	5.97049	Pure water	Pure methanol	gradient elution	7.5
Nicotinic acid	198631	5.29805	Pure water	Pure methanol	gradient elution	0.98
Glycine	8687.2	3.93888	Pure water	Pure methanol	gradient elution	0.8
Alanine	53911.2	4.73168	Pure water	Pure methanol	gradient elution	0.82
Leucine	168569	5.22678	Pure water	Pure methanol	gradient elution	2.04
Isoleucine	130842	5.11675	Pure water	Pure methanol	gradient elution	1.89
Valine	111627	5.04777	Pure water	Pure methanol	gradient elution	1.04
Proline	172396	5.23653	Pure water	Pure methanol	gradient elution	0.96
Phenylalanine	90859.8	4.95837	Pure water	Pure methanol	gradient elution	4.4
Methionine	71464.9	4.85409	Pure water	Pure methanol	gradient elution	1.4
Tryptophan	33991.4	4.53137	Pure water	Pure methanol	gradient elution	5.36
Serine	15729.1	4.1967	Pure water	Pure methanol	gradient elution	0.8
Glutamine	39662.6	4.59838	Pure water	Pure methanol	gradient elution	0.83
Threonine	26544.2	4.42397	Pure water	Pure methanol	gradient elution	0.83
Cysteine	3024.92	3.48071	Pure water	Pure methanol	gradient elution	0.87
Asparagine	9507.22	3.97805	Pure water	Pure methanol	gradient elution	0.81
Glutamic acid	7076.29	3.84981	Pure water	Pure methanol	gradient elution	0.6
Lysine	89307.4	4.95089	Pure water	Pure methanol	gradient elution	1.4
Arginine	848556	5.92868	Pure water	Pure methanol	gradient elution	1.5
Histidine	437876	5.64135	Pure water	Pure methanol	gradient elution	1.35
Citrulline	22099.6	4.34438	Pure water	Pure methanol	gradient elution	0.87
Taurine	1536.58	3.18656	Pure water	Pure methanol	gradient elution	0.8
Aspartic acid	2070.36	3.31605	Pure water	Pure methanol	gradient elution	0.6
Tyrosine	278540	5.44489	Pure water	Pure methanol	gradient elution	5.2
Hypotaurine	4863.87	3.68698	Pure water	Pure methanol	gradient elution	0.82
L-Hydroxyproline	42990.4	4.63337	Pure water	Pure methanol	gradient elution	0.84
N-omiga-acetylhistamine	1798840	6.25499	Pure water	Pure methanol	gradient elution	4.6
L-pyroglutamic acid	18628.6	4.27018	Pure water	Pure methanol	gradient elution	0.83
Histamine	38101.4	4.58094	Pure water	Pure methanol	gradient elution	4.6
AaC	1334070	6.12518	Pure water	Pure methanol	gradient elution	10
IQx	1950690	6.29019	Pure water	Pure methanol	gradient elution	7.35
MeAaC	1287190	6.10964	Pure water	Pure methanol	gradient elution	10.95
8-MeIQx	1968930	6.29423	Pure water	Pure methanol	gradient elution	8.27
MeIQ	1831300	6.26276	Pure water	Pure methanol	gradient elution	8.77
IQ[4,5-b]	1920450	6.2834	Pure water	Pure methanol	gradient elution	8.9
Harman	4310970	6.63458	Pure water	Pure methanol	gradient elution	10.5
IQ	1817780	6.25954	Pure water	Pure methanol	gradient elution	8.09
Norharman	3914820	6.59271	Pure water	Pure methanol	gradient elution	10.33
DMIP	2824880	6.451	Pure water	Pure methanol	gradient elution	7.33
Phe-p-1	4321600	6.63564	Pure water	Pure methanol	gradient elution	10.16
PhIP	1961210	6.29252	Pure water	Pure methanol	gradient elution	10.02
7,8-DiMeIQx	2299850	6.3617	Pure water	Pure methanol	gradient elution	9
Sarcosine	54050.4	4.7328	Pure water	Pure methanol	gradient elution	0.82
Creatinine	988673	5.99505	Pure water	Pure methanol	gradient elution	1.4
L-Dihydroorotic acid	1867.17	3.27118	Pure water	Pure methanol	gradient elution	4.12
L-Carnosine	58717.1	4.76876	Pure water	Pure methanol	gradient elution	1.4
Betaine	464533	5.66702	Pure water	Pure methanol	gradient elution	0.88
Cytosine	736128	5.86695	Pure water	Pure methanol	gradient elution	1.24
Hypoxanthine	115871	5.06397	Pure water	Pure methanol	gradient elution	2.2
Xanthine	25560.8	4.40757	Pure water	Pure methanol	gradient elution	2.41
Guanine	139624	5.14496	Pure water	Pure methanol	gradient elution	2.2
Uracil	7171.25	3.85559	Pure water	Pure methanol	gradient elution	1.49
Adenine	1194080	6.07703	Pure water	Pure methanol	gradient elution	4.11
Cytidine	39670.2	4.59846	Pure water	Pure methanol	gradient elution	2
Inosine	528.506	2.72305	Pure water	Pure methanol	gradient elution	4.17
Xanthosine	2773.79	3.44307	Pure water	Pure methanol	gradient elution	2.55
Guanosine	6438.97	3.80882	Pure water	Pure methanol	gradient elution	4.3
Uridine	12343.1	4.09142	Pure water	Pure methanol	gradient elution	1.21
Adenosine	448700	5.65196	Pure water	Pure methanol	gradient elution	5.28
d3-Hypoxanthion	41186.3	4.61475	Pure water	Pure methanol	gradient elution	5.34
D-Pantothenic acid	38294.7	4.58314	0.1% formic acid water	0.1% formic acid methanol	gradient elution	2.15
Niacinamide	275002	5.43934	0.1% formic acid water	0.1% formic acid methanol	gradient elution	2.18
Pyridoxal	187767	5.27362	0.1% formic acid water	0.1% formic acid methanol	gradient elution	1.62
Biotin	45400.7	4.65706	0.1% formic acid water	0.1% formic acid methanol	gradient elution	7.18
Pyridoxine	777070	5.89046	0.1% formic acid water	0.1% formic acid methanol	gradient elution	2.2
Pyridoxamine	425486	5.62889	0.1% formic acid water	0.1% formic acid methanol	gradient elution	0.85
Thiamine	196991	5.29445	0.1% formic acid water	0.1% formic acid methanol	gradient elution	0.91
Nicotinic acid	282673	5.45128	0.1% formic acid water	0.1% formic acid methanol	gradient elution	1.67
Glycine	25208.8	4.40155	0.1% formic acid water	0.1% formic acid methanol	gradient elution	0.79
Alanine	86173.5	4.93537	0.1% formic acid water	0.1% formic acid methanol	gradient elution	0.81
Leucine	223850	5.34996	0.1% formic acid water	0.1% formic acid methanol	gradient elution	2.62
Isoleucine	213448	5.32929	0.1% formic acid water	0.1% formic acid methanol	gradient elution	2.42
Valine	163831	5.2144	0.1% formic acid water	0.1% formic acid methanol	gradient elution	1.26
Proline	287486	5.45862	0.1% formic acid water	0.1% formic acid methanol	gradient elution	0.96
Phenylalanine	253501	5.40398	0.1% formic acid water	0.1% formic acid methanol	gradient elution	4.62
Methionine	133424	5.12523	0.1% formic acid water	0.1% formic acid methanol	gradient elution	1.5
Tryptophan	124756	5.09606	0.1% formic acid water	0.1% formic acid methanol	gradient elution	5.75
Serine	73046.1	4.8636	0.1% formic acid water	0.1% formic acid methanol	gradient elution	0.79
Glutamine	81178	4.90944	0.1% formic acid water	0.1% formic acid methanol	gradient elution	0.82
Threonine	85290.4	4.9309	0.1% formic acid water	0.1% formic acid methanol	gradient elution	0.84
Cysteine	43863.3	4.6421	0.1% formic acid water	0.1% formic acid methanol	gradient elution	0.88
Asparagine	64174.1	4.80736	0.1% formic acid water	0.1% formic acid methanol	gradient elution	0.8
Glutamic acid	73861.6	4.86842	0.1% formic acid water	0.1% formic acid methanol	gradient elution	0.85
Lysine	71460.3	4.85406	0.1% formic acid water	0.1% formic acid methanol	gradient elution	0.71
Arginine	208445	5.31899	0.1% formic acid water	0.1% formic acid methanol	gradient elution	0.75
Histidine	140624	5.14806	0.1% formic acid water	0.1% formic acid methanol	gradient elution	0.73
Citrulline	57772.6	4.76172	0.1% formic acid water	0.1% formic acid methanol	gradient elution	0.87
Taurine	19918.6	4.29926	0.1% formic acid water	0.1% formic acid methanol	gradient elution	0.81
Aspartic acid	52339	4.71883	0.1% formic acid water	0.1% formic acid methanol	gradient elution	0.82
Tyrosine	196472	5.2933	0.1% formic acid water	0.1% formic acid methanol	gradient elution	4.3
Hypotaurine	47096.7	4.67299	0.1% formic acid water	0.1% formic acid methanol	gradient elution	0.82
L-Hydroxyproline	121462	5.08444	0.1% formic acid water	0.1% formic acid methanol	gradient elution	0.83
Spermidine	423446	5.6268	0.1% formic acid water	0.1% formic acid methanol	gradient elution	0.62
N-omiga-acetylhistamine	879094	5.94404	0.1% formic acid water	0.1% formic acid methanol	gradient elution	1.01
L-pyroglutamic acid	43631.9	4.6398	0.1% formic acid water	0.1% formic acid methanol	gradient elution	0.81
Tyramine	142161	5.15278	0.1% formic acid water	0.1% formic acid methanol	gradient elution	2.73
Histamine	695562	5.84234	0.1% formic acid water	0.1% formic acid methanol	gradient elution	0.66
AaC	969829	5.9867	0.1% formic acid water	0.1% formic acid methanol	gradient elution	8.33
IQx	815285	5.91131	0.1% formic acid water	0.1% formic acid methanol	gradient elution	5.76
MeAaC	1259460	6.10018	0.1% formic acid water	0.1% formic acid methanol	gradient elution	9.17
8-MeIQx	842948	5.9258	0.1% formic acid water	0.1% formic acid methanol	gradient elution	6.57
MeIQ	962673	5.98348	0.1% formic acid water	0.1% formic acid methanol	gradient elution	5.76
IQ[4,5-b]	869507	5.93927	0.1% formic acid water	0.1% formic acid methanol	gradient elution	6.61
Harman	1635340	6.21361	0.1% formic acid water	0.1% formic acid methanol	gradient elution	7.43
IQ	1099890	6.04135	0.1% formic acid water	0.1% formic acid methanol	gradient elution	5.4
Norharman	1488440	6.17273	0.1% formic acid water	0.1% formic acid methanol	gradient elution	6.96
DMIP	1239910	6.09339	0.1% formic acid water	0.1% formic acid methanol	gradient elution	5.1
Phe-p-1	1614250	6.20797	0.1% formic acid water	0.1% formic acid methanol	gradient elution	7.18
PhIP	960195	5.98236	0.1% formic acid water	0.1% formic acid methanol	gradient elution	7.86
7,8-DiMeIQx	1046330	6.01967	0.1% formic acid water	0.1% formic acid methanol	gradient elution	7.25
Sarcosine	86392.9	4.93648	0.1% formic acid water	0.1% formic acid methanol	gradient elution	0.81
Creatinine	263732	5.42116	0.1% formic acid water	0.1% formic acid methanol	gradient elution	0.89
L-Dihydroorotic acid	6719.92	3.82736	0.1% formic acid water	0.1% formic acid methanol	gradient elution	1.01
L-Carnosine	23582.3	4.37259	0.1% formic acid water	0.1% formic acid methanol	gradient elution	0.75
Uric acid	17648.5	4.24671	0.1% formic acid water	0.1% formic acid methanol	gradient elution	1.88
Betaine	340265	5.53182	0.1% formic acid water	0.1% formic acid methanol	gradient elution	0.87
Cytosine	256819	5.40963	0.1% formic acid water	0.1% formic acid methanol	gradient elution	0.9
Hypoxanthine	125514	5.09869	0.1% formic acid water	0.1% formic acid methanol	gradient elution	2.08
Xanthine	60805.8	4.78395	0.1% formic acid water	0.1% formic acid methanol	gradient elution	2.5
Guanine	162953	5.21206	0.1% formic acid water	0.1% formic acid methanol	gradient elution	1.52
Uracil	33954.1	4.53089	0.1% formic acid water	0.1% formic acid methanol	gradient elution	1.49
Adenine	474062	5.67584	0.1% formic acid water	0.1% formic acid methanol	gradient elution	1.45
Beta-Thymidine	2767	3.44201	0.1% formic acid water	0.1% formic acid methanol	gradient elution	4.95
Cytidine	28709.9	4.45803	0.1% formic acid water	0.1% formic acid methanol	gradient elution	1.06
Inosine	8165.03	3.91196	0.1% formic acid water	0.1% formic acid methanol	gradient elution	4.18
Xanthosine	10224	4.00962	0.1% formic acid water	0.1% formic acid methanol	gradient elution	4.65
Guanosine	39384	4.59532	0.1% formic acid water	0.1% formic acid methanol	gradient elution	4.21
Adenosine	192517	5.28447	0.1% formic acid water	0.1% formic acid methanol	gradient elution	4.23
d3-Hypoxanthion	142947	5.15518	0.1% formic acid water	0.1% formic acid methanol	gradient elution	2.05
