# Supplementary material for: Prediction of mass spectrometry ionization efficiency based on COSMO-RS and machine learning algorithms
Source: Royal Society of Chemistry journal article supplement (doi:10.1039/d4an00301b), 2024-01-01
Supplement: d4an00301b4.xlsx [file d4an00301b4.xlsx]

## Sheet: MLR-C
Compounds	Mobile phase A	Mobile phase B	Elution conditions	predicted_values	true_values	Standardized residuals	Leverage Value
Glutamicacid	Pure water	Pure methanol	65% B isocratic elution	-0.69129	-1.95	-3.2348	0.08421
Cysteine	Pure water	Pure methanol	80% B isocratic elution	-0.620194	-1.8	-3.03203	0.06923
Citrulline	Pure water	Pure methanol	95% B isocratic elution	-0.0930327	-1.42	-3.41022	0.04644
8-MeIQx	0.1% formic acid water	0.1% formic acid methanol	5% B isocratic elution	0.985677	-1.32	-5.92545	0.04153
Thiamine	0.1% formic acid water	0.1% formic acid methanol	5% B isocratic elution	0.165462	0.2	0.102866	0.35049

## Sheet: RF-C
Compounds	Mobile phase A	Mobile phase B	Elution conditions	predicted_values	true_values	Standardized residuals	Leverage Value
Histamine	Pure water	Pure methanol	5% B isocratic elution	0.2754	-0.22	-3.13557	0.0452
Glutamicacid	Pure water	Pure methanol	65% B isocratic elution	-1.3048	-1.95	-4.08371	0.08421
8-MeIQx	0.1% formic acid water	0.1% formic acid methanol	5% B isocratic elution	-0.4442	-1.32	-5.54326	0.04153
Tyramine	0.1% formic acid water	0.1% formic acid methanol	65% B isocratic elution	0.3582	-0.13	-3.09	0.04648
Thiamine	0.1% formic acid water	0.1% formic acid methanol	5% B isocratic elution	0.165462	0.2	0.102866	0.35049

## Sheet: ANN-C
Compounds	Mobile phase A	Mobile phase B	Elution conditions	predicted_values	true_values	Standardized residuals	Leverage Value
Glutamicacid	Pure water	Pure methanol	65% B isocratic elution	-0.444526	-1.95	-4.48382	0.08421
Cysteine	Pure water	Pure methanol	80% B isocratic elution	-0.65375	-1.8	-3.41393	0.06923
Thiamine	0.1% formic acid water	0.1% formic acid methanol	5% B isocratic elution	0.165462	0.2	0.102866	0.35049

## Sheet: MLR-MC
Compounds	Mobile phase A	Mobile phase B	Elution conditions	predicted_values	true_values	Standardized residuals	Leverage Value
Glutamicacid	Pure water	Pure methanol	65% B isocratic elution	-0.624105	-1.95	-3.67278	0.05499
8-MeIQx	0.1% formic acid water	0.1% formic acid methanol	5% B isocratic elution	0.540163	-1.32	-5.15272	0.05766

## Sheet: RF-MC
Compounds	Mobile phase A	Mobile phase B	Elution conditions	predicted_values	true_values	Standardized residuals	Leverage Value
Adenine	Pure water	Pure methanol	20% B isocratic elution	0.9914	1.49	3.13943	0.04158
Glutamicacid	Pure water	Pure methanol	65% B isocratic elution	-1.2376	-1.95	-4.48562	0.05499
Tyramine	Pure water	Pure methanol	80% B isocratic elution	0.6792	1.17	3.09032	0.05533
Tyramine	0.1% formic acid water	0.1% formic acid methanol	80% B isocratic elution	0.2912	-0.21	-3.1558	0.05538
Tyramine	0.1% formic acid water	0.1% formic acid methanol	95% B isocratic elution	0.3596	-0.15	-3.20869	0.05687
Biotin	Pure water	Pure methanol	gradient elution	0.6194	-1.01	-3.14485	0.063048

## Sheet: ANN-MC
Compounds	Mobile phase A	Mobile phase B	Elution conditions	predicted_values	true_values	Standardized residuals	Leverage Value
Glutamicacid	Pure water	Pure methanol	65% B isocratic elution	-0.384248	-1.95	-4.53061	0.05499
Tyramine	Pure water	Pure methanol	65% B isocratic elution	0.0797113	1.13	3.03908	0.05447
Cysteine	Pure water	Pure methanol	80% B isocratic elution	-0.524454	-1.8	-3.69088	0.03361
Tyramine	Pure water	Pure methanol	80% B isocratic elution	0.0780764	1.17	3.15956	0.05533
Tyramine	Pure water	Pure methanol	95% B isocratic elution	0.0767679	1.16	3.13441	0.05679
