# Supplementary material for: Prediction of mass spectrometry ionization efficiency based on COSMO-RS and machine learning algorithms
Source: Royal Society of Chemistry journal article supplement (doi:10.1039/d4an00301b), 2024-01-01
Supplement: d4an00301b5.xlsx [file d4an00301b5.xlsx]

## Sheet: Sheet1
Class	Compounds	Without formic acid	Slope	Intercept	R2	with 0.1% formic acid	Slope	Intercept	R2
Vitamins	D-Pantothenic acid		0.0194164	3.77312	0.00182293		0.24211	4.42304	0.867632
	niacinamide		0.142103	5.45456	0.567846		0.509342	5.31296	0.98501
	Pyridoxal		0.0582619	5.81312	0.0641797		0.435059	5.28831	0.893635
	Biotin		0.490045	3.89106	0.357931		0.225286	4.50716	0.847762
	Pyridoxine		0.475573	6.16141	0.872542		0.50317	5.83489	0.968511
	Pyridoxamine		0.567888	5.93277	0.950647		0.815742	5.49777	0.988577
	Thiamine		1.00237	5.42791	0.990679		0.896157	5.28902	0.981214
	Nicotinic acid		-0.79096	5.29199	0.714559		0.553057	5.33248	0.984498
Amino acid (AA)	Glycine		-0.530822	4.09898	0.998109		0.724552	4.29473	0.985664
	Alanine		-0.421607	4.87057	0.66537		0.704668	4.81372	0.986306
	Leucine		-0.243764	5.31583	0.330498		0.651943	5.27734	0.956315
	Isoleucine		-0.264761	5.34654	0.542703		0.712229	5.23975	0.970827
	Valine		-0.36133	5.25791	0.740503		0.729522	5.11865	0.96964
	Proline		-0.329131	5.37678	0.897624		0.64786	5.34807	0.973891
	Phenylalanine		-0.353631	5.21327	0.598829		0.66436	5.16267	0.962252
	Methionine		-0.827712	5.15099	0.930468		0.535867	5.00364	0.969595
	Tryptophan		-0.409064	4.84356	0.644793		0.591241	4.79057	0.931772
	Serine		-0.694497	4.48349	0.855628		0.699539	4.72419	0.99107
	Glutamine		-0.330086	4.37759	0.971325		0.597855	4.72965	0.981355
	Threonine		-0.0281468	4.51055	0.000732155		0.706641	4.80816	0.985859
	Cysteine		-1.20928	4.27636	0.848113		0.601367	4.57619	0.966549
	Asparagine		-0.488082	4.15043	0.962071		0.659297	4.6596	0.985272
	Glutamic acid		-2.19404	4.55251	0.889142		0.650342	4.75077	0.976518
	Lysine		0.091144	5.07976	0.275315		0.701539	4.73583	0.977057
	Arginine		0.224383	5.62147	0.81116		0.684741	5.04596	0.937859
	Histidine		-0.0432633	5.40373	0.0623904		0.649854	4.98281	0.974055
	Citrulline		-0.71893	4.38649	0.941505		0.572752	4.62397	0.985007
	Taurine		0.720998	3.39818	0.84106		0.517987	4.26836	0.98587
	Aspartic acid		-1.61669	3.92758	0.978352		0.684149	4.62077	0.984725
	Tyrosine		0.709575	5.17795	0.888221		0.597607	5.11567	0.895236
AA-related derivatives and metabolites	Hypotaurine		0.193146	3.7925	0.46863		0.606943	4.59427	0.989551
	L-Hydroxyproline		-0.119983	4.53496	0.382275		0.682035	4.95036	0.976001
	Spermidine		/	/	/*		0.635132	5.45539	0.85541
	N-omiga-acetylhistamine		0.539128	6.20357	0.890951		0.780385	5.84778	0.954397
	L-pyroglutamicacid		-0.695383	4.27006	0.950483		0.571948	4.49187	0.953375
	Tyramine		1.01329	5.2682	0.988244		0.447711	5.0029	0.899456
	Histamine		0.555642	4.5371	0.843304		0.829223	5.67286	0.954624
Heterocyclic amines	AaC		0.131441	6.22023	0.0467341		0.86715	5.4222	0.735344
	IQx		1.26086	5.58671	0.536167		0.744433	5.58487	0.863716
	MeAaC		0.895228	5.77556	0.534555		0.468218	5.84351	0.957164
	8-MeIQx		0.56265	6.03926	0.815698		2.01721	4.73622	0.562906
	MeIQ		0.554511	6.11528	0.781829		0.751291	5.74499	0.937231
	IQ[4,5-b]		0.625723	5.92875	0.836919		0.592697	5.71825	0.9139
	Harman		0.804274	6.1159	0.951199		0.613341	5.94546	0.922509
	IQ		0.749249	6.09862	0.977374		0.775207	5.87524	0.981889
	Norharman		1.17577	5.78896	0.814268		0.620874	5.88717	0.911101
	DMIP		0.925434	5.98512	0.729519		0.72758	5.86546	0.942889
	Phe-p-1		0.642974	6.23633	0.857214		0.555194	6.00512	0.929203
	PhIP		0.380742	6.08602	0.434452		0.472074	5.76035	0.933264
	7,8-DiMeIQx		0.635399	6.10099	0.864323		0.59542	5.82205	0.837784
Other metabolites	Sarcosine(JAA)		-0.437064	4.8759	0.685404		0.696876	4.81954	0.98751
	Creatinine(JIG)		-0.0484616	6.10611	0.0664047		0.689543	5.50055	0.861344
	L-dihydrowheyacid		-0.236575	3.56972	0.119629		-0.660149	3.64253	0.795774
	L-Carnosine(JIT)		0.295519	4.99974	0.504175		1.13942	4.49312	0.885325
	Uric acid		-2.85294	4.06817	0.927959		-0.559071	4.39625	0.630289
	Betaine		0.299939	5.65308	0.221673		0.566917	5.58703	0.877794
Nucleobases	Cytosine		-0.246624	6.1186	0.534212		0.497651	5.3777	0.953937
	Hypoxanthine		0.0889841	4.76786	0.0543868		0.571622	5.12794	0.96665
	Xanthine		-0.285983	4.13732	0.0797885		0.599995	4.74738	0.937821
	Guanine		-0.578625	5.37511	0.497815		0.673395	5.11773	0.941719
	Uracil		0.668044	4.30567	1.00*		-0.032337	4.57431	0.0199838
	Adenine		-0.203644	6.19966	0.128893		0.377849	5.58046	0.822873
Nucleosides	Beta-Thymidine		-3.97491	5.00128	0.943733		0.314858	3.38265	0.941414
	Cytidine		-0.293441	4.66516	0.434151		0.414235	4.28017	0.633681
	Inosine		0.710125	3.11664	0.202408		0.408609	3.83802	0.878842
	Xanthosine		0.575215	3.53958	0.334324		0.401592	3.91258	0.914948
	Guanosine		-0.390114	4.02848	0.1724		0.463437	4.44338	0.958082
	Uridine		0.684566	3.74178	0.266171		1.24343	3.53932	0.603607
	Adenosine		-0.483317	5.24306	0.408322		0.167076	5.10901	0.533085
Deuterated label	d3-Hypoxanthion		0.255653	4.74185	0.635568		0.533572	5.08671	0.980873
Correlation parameters obtained from the correlation between the content (from 5% to 95%) of the isocratic elution mobile phase B (y-axis) and the mass spectral IE (x-axis) of the compound under this condition. Asterisks indicate that the point used for regression under this condition is less than or equal to 2.
